# Supplementary material for: Experimentally induced active and quiet sleep engage non-overlapping transcriptional programs in Drosophila
Source: bioRxiv preprint, doi:10.1101/2023.04.03.535331, version 3 (2023-10-15)
Supplement: Figure6-source data 1 [file 535331_file14.xlsx]

## Sheet: Significant THIP
R23E10Gal4 > UASChrimson +THIP vs -THIP
Downregulated			Upregulated
Gene Name	Log2Fold Change	qFDR	Gene Name	Log2Fold Change	qFDR
tor	-5.5927	0.0485	CG10513	0.6312	0.0429
Pxt	-4.0111	0.0151	Gasp	0.6613	0.0383
CycB	-3.2959	0.018	Act57B	0.7229	0.0283
pgc	-3.2679	0.0356	Nplp3	0.7604	0.0383
Pen	-3.0667	0.0356	Bin1	0.7851	0.0383
RpS5b	-2.9064	0.0426	verm	0.8415	0.0177
dhd	-2.7329	0.0323	Cht7	1.1045	0.0456
Obp99a	-2.4686	0.016	CG16885	1.1807	0.0356
Yp2	-2.4115	0.0104	Cpr76Bd	1.4662	0.0243
CR45601	-2.4067	0.0402	CR45145	1.4668	0.0246
Yp1	-2.3202	0.0103	Cpr100A	1.5109	0.0116
CG43351	-2.3117	0.022	CG16884	1.5916	0.0356
CG1979	-2.2851	0.0288	CG7203	1.7404	0.0112
CG14400	-2.2651	0.0057	CR44138	2.1014	0.042
Yp3	-2.2277	0.006	CR43463	2.1671	0.0115
CR43411	-2.2015	0.0253	CG5999	2.8634	0.0045
CR44065	-2.0314	0.0178	Fbp1	4.2873	0.0054
CG9928	-1.8835	0.0357	CG5724	4.3238	0.0115
CG16756	-1.86	0.0033	Eh	5.7702	0.0412
CG2233	-1.8358	0.042
CG5819	-1.7837	0.0033
CG17244	-1.7735	0.0175
CG1315	-1.7439	0.0253
Iris	-1.7142	0.0333
CG33493	-1.7104	0.014
CG8665	-1.7038	0.0356
CG8539	-1.6861	0.0033
CG6067	-1.6778	0.0175
CG6503	-1.6677	0.0269
Odc1	-1.6563	0.0104
CG33120	-1.654	0.0383
Rfabg	-1.6437	0.0054
bgm	-1.636	0.0102
CG6415	-1.607	0.0356
CG9377	-1.6068	0.014
Cyp4ac1	-1.5776	0.0057
Est-Q	-1.5512	0.014
CG1468	-1.5401	0.042
CG2736	-1.5298	0.0333
CG42329	-1.5242	0.0033
CG3597	-1.5225	0.042
Nplp2	-1.5133	0.0455
CG13315	-1.5037	0.042
CG1887	-1.4783	0.022
Spat	-1.4735	0.0412
CG13607	-1.4074	0.0341
CG32191	-1.406	0.0356
CG44286	-1.3991	0.0175
Tps1	-1.3951	0.042
CG13912	-1.3828	0.0288
Ela	-1.3556	0.0323
shf	-1.3509	0.03
CG1628	-1.3353	0.0206
CG7470	-1.2256	0.0322
AkhR	-1.2227	0.014
CCHa2	-1.2025	0.0341
Galk	-1.1948	0.0482
Acox57D-d	-1.1627	0.0115
CG30046	-1.153	0.014
CG3829	-1.14	0.0412
Tequila	-1.1297	0.0014
Apoltp	-1.0948	0.0387
CG11400	-1.0864	0.0388
CG11594	-1.0826	0.0333
Oat	-0.9824	0.0255
srp	-0.9703	0.0383
Mtp	-0.9682	0.0363
Acer	-0.9634	0.0363
CG2145	-0.9556	0.0322
CG3523	-0.9508	0.0314
RpL39	-0.9485	0
Ef1alpha48D	-0.8515	0.016
Ugt86Dd	-0.8503	0.0104
RpL41	-0.8432	0.0046
RpLP1	-0.8289	0.0023
CG4038	-0.8234	0.0356
RpLP2	-0.8053	0.0104
CG9837	-0.7952	0.0383
CG9649	-0.7875	0.0306
RpS23	-0.7489	0.0175
RpS21	-0.7353	0.002
Mtap	-0.7146	0.0366
Ef1beta	-0.7115	0.0322
Egfr	-0.708	0.0115
ACC	-0.6963	0.0157
CG9238	-0.6919	0.0288
RpL29	-0.6878	0.0054
RpS13	-0.6771	0.0033
RpL23	-0.663	0.01
eIF-5A	-0.6621	0.002
RpS29	-0.6587	0.002
RpS20	-0.6552	0.0175
RpS8	-0.6505	0.0481
CG4847	-0.6504	0.0356
RpS9	-0.6467	0.0387
RpL9	-0.6463	0.0054
Ef1gamma	-0.6367	0.0361
RpL35	-0.6318	0.0356
RpS16	-0.6308	0.0361
RpS27A	-0.6199	0.0098
sta	-0.6196	0.0306
tsl	-0.6192	0.0409
RpL27	-0.6191	0.042
RpL30	-0.6169	0.0135
MtnA	-0.6114	0.014
RpL18A	-0.6088	0.0301
RpL10	-0.6007	0.0045
RpS15	-0.596	0.0356
RpL12	-0.5888	0.0175
RpS2	-0.5805	0.018

## Sheet: All Genes
Row.names	dm7_1	dm7_2	dm7_3	dm7_4	dm7_5	dm8_1	dm8_2	dm8_3	dm8_4	dm8_5	logFC	logCPM	F	PValue	FDR
128up	20.3083	20.0024	22.5563	20.9788	19.4915	20.8725	14.5569	15.9613	20.7567	11.3806	0.259786	4.49957	4.20556	0.0628123	0.560951
140up	15.5421	16.4968	12.218	15.4581	13.9225	14.2032	14.5569	13.1854	13.2088	17.7404	0.0257111	3.85757	0.0388861	0.844133	1
14-3-3epsilon	622.926	684.411	714.91	609.49	646.8	626.917	608.476	610.693	759.193	697.901	-0.0120708	9.19045	0.0209163	0.885341	1
14-3-3zeta	1726.62	1937.34	2008.14	1711.65	1749.4	1797.14	1874.92	1861.57	1904.9	1856.05	-0.0252774	10.6062	0.115709	0.734554	1
18w	37.301	45.9848	40.7267	39.9702	50.1211	34.7052	21.8353	41.1177	31.4496	36.485	0.318169	5.44024	5.57313	0.0204685	0.363071
26-29-p	118.949	116.096	93.6714	97.8276	117.48	84.6016	68.4172	78.245	64.4717	66.2755	0.577224	6.83069	15.1784	0.000191382	0.0332723
2mit	136.149	161.669	140.664	144.202	153.413	164.14	190.695	168.808	176.118	174.057	-0.239835	7.24247	7.19012	0.0087669	0.233138
312	14.5059	16.9092	20.9899	18.108	15.4474	14.4502	17.4682	16.3083	16.0393	15.0626	0.124676	3.92417	0.97464	0.353599	0.907858
4EHP	204.948	239.822	225.563	195.434	203.468	226.263	211.074	219.815	267.951	217.571	-0.0998503	7.43629	0.986945	0.32324	0.885465
4E-T	113.561	134.655	143.17	119.69	120.596	119.801	129.556	128.731	134.604	134.894	-0.0361453	6.98591	0.113384	0.737133	1
5.8SrRNA:CR40454	12.6409	4.33041	3.75939	3.53328	4.11046	2.22311	10.1898	7.28667	0.943488	5.3556	0.376643	5.96192	0.0386032	0.844694	1
5-HT1A	63.4117	66.3996	66.1025	63.3782	66.6292	70.0279	65.5058	74.7751	76.108	70.6269	-0.140431	6.06899	2.30471	0.1326	0.727525
5-HT1B	33.9853	34.4371	39.4736	42.6202	41.3698	37.0518	33.4808	38.6888	40.57	40.5017	-0.0014675	5.22628	0.00018407	0.989206	1
5-HT2A	108.173	124.963	122.493	139.564	117.082	117.701	142.657	137.579	141.523	111.129	-0.0803624	6.94023	0.721743	0.3979	0.944168
5-HT2B	25.2818	29.9004	27.5688	28.7079	28.508	29.8885	24.7466	36.2599	30.1916	29.7905	-0.139857	4.83607	1.24778	0.267047	0.881103
5-HT7	29.8408	33.406	28.822	25.6163	31.0273	28.4064	29.1137	31.5756	35.2235	36.485	-0.115468	4.86802	1.19379	0.409311	0.954622
5PtaseI	71.2863	64.3375	71.1151	75.303	67.0933	77.6853	94.6195	74.2547	78.9385	73.6395	-0.173322	6.45989	6.25911	0.014223	0.303068
5SrRNA:CR33353	0	0	0	0	0	0	0	0	0	0	0	-1.30545	0	1	1
5SrRNA:CR33354	0	0	0	0	0	0	0	0	0	0	0	-1.30545	0	1	1
5SrRNA:CR33355	0	0	0	0	0	0	0	0	0	0	0	-1.30545	0	1	1
5SrRNA:CR33357	0	0	0	0	0	0	0	0	0	0	0	-1.30545	0	1	1
5SrRNA:CR33358	0	0	0	0	0	0	0	0	0	0	0	-1.30545	0	1	1
5SrRNA:CR33359	0	0	0	0	0	0	0	0	0	0	0	-1.30545	0	1	1
5SrRNA:CR33360	0	0	0	0	0	0	0	0	0	0	0	-1.30545	0	1	1
5SrRNA:CR33361	0	0	0	0	0	0	0	0	0	0	0	-1.30545	0	1	1
5SrRNA:CR33362	0	0	0	0	0	0	0	0	0	0	0	-1.30545	0	1	1
5SrRNA:CR33364	0	0	0	0	0	0	0	0	0	0	0	-1.30545	0	1	1
5SrRNA:CR33365	0	0	0	0	0	0	0	0	0	0	0	-1.30545	0	1	1
5SrRNA:CR33366	0	0	0	0	0	0	0	0	0	0	0	-1.30545	0	1	1
5SrRNA:CR33367	0	0	0	0	0.0662977	0	0	0	0	0	1.0767	-1.06526	0.803273	0.37401	0.919975
5SrRNA:CR33368	0	0	0	0	0	0	0	0	0	0	0	-1.30545	0	1	1
5SrRNA:CR33369	0	0	0	0	0	0	0	0	0	0	0	-1.30545	0	1	1
5SrRNA:CR33370	0	0	0	0	0	0	0	0	0	0	0	-1.30545	0	1	1
5SrRNA:CR33372	0	0	0	0	0	0	0	0	0	0	0	-1.30545	0	1	1
5SrRNA:CR33373	0	0	0	0	0	0	0	0	0	0	0	-1.30545	0	1	1
5SrRNA:CR33374	0	0	0	0	0	0	0	0	0	0	0	-1.30545	0	1	1
5SrRNA:CR33375	0	0	0	0	0	0	0	0	0	0	0	-1.30545	0	1	1
5SrRNA:CR33376	0	0	0	0	0	0	0	0	0	0	0	-1.30545	0	1	1
5SrRNA:CR33377	0	0	0	0	0	0	0	0	0	0	0	-1.30545	0	1	1
5SrRNA:CR33378	0	0	0	0	0	0	0	0	0	0	0	-1.30545	0	1	1
5SrRNA:CR33379	0	0	0	0	0	0	0	0	0	0	0	-1.30545	0	1	1
5SrRNA:CR33380	0	0	0	0	0	0	0	0	0	0	0	-1.30545	0	1	1
5SrRNA:CR33381	0	0	0	0	0	0	0	0	0	0	0	-1.30545	0	1	1
5SrRNA:CR33382	0	0	0	0	0	0	0	0	0	0	0	-1.30545	0	1	1
5SrRNA:CR33383	0	0	0	0	0	0	0	0	0	0	0	-1.30545	0	1	1
5SrRNA:CR33384	0	0	0	0	0	0	0	0	0	0	0	-1.30545	0	1	1
5SrRNA:CR33385	0	0	0	0	0	0	0	0	0	0	0	-1.30545	0	1	1
5SrRNA:CR33386	0	0	0	0	0	0	0	0	0	0	0	-1.30545	0	1	1
5SrRNA:CR33387	0	0	0	0	0	0	0	0	0	0	0	-1.30545	0	1	1
5SrRNA:CR33388	0	0	0	0	0	0	0	0	0	0	0	-1.30545	0	1	1
5SrRNA:CR33389	0	0	0	0	0	0	0	0	0	0	0	-1.30545	0	1	1
5SrRNA:CR33390	0	0	0	0	0	0	0	0	0	0	0	-1.30545	0	1	1
5SrRNA:CR33391	0	0	0	0	0	0	0	0	0	0	0	-1.30545	0	1	1
5SrRNA:CR33392	0	0	0	0	0	0	0	0	0	0	0	-1.30545	0	1	1
5SrRNA:CR33393	0	0	0	0	0	0	0	0	0	0	0	-1.30545	0	1	1
5SrRNA:CR33394	0	0	0	0	0	0	0	0	0	0	0	-1.30545	0	1	1
5SrRNA:CR33395	0	0	0	0	0	0	0	0	0	0	0	-1.30545	0	1	1
5SrRNA:CR33396	0	0	0	0	0	0	0	0	0	0	0	-1.30545	0	1	1
5SrRNA:CR33397	0	0	0	0	0	0	0	0	0	0	0	-1.30545	0	1	1
5SrRNA:CR33398	0	0	0	0	0	0	0	0	0	0	0	-1.30545	0	1	1
5SrRNA:CR33399	0	0	0	0	0	0	0	0	0	0	0	-1.30545	0	1	1
5SrRNA:CR33400	0	0	0	0	0	0	0	0	0	0	0	-1.30545	0	1	1
5SrRNA:CR33401	0	0	0	0	0	0	0	0	0	0	0	-1.30545	0	1	1
5SrRNA:CR33402	0	0	0	0	0	0	0	0	0	0	0	-1.30545	0	1	1
5SrRNA:CR33403	0	0	0	0	0	0	0	0	0	0	0	-1.30545	0	1	1
5SrRNA:CR33404	0	0	0	0	0	0	0	0	0	0	0	-1.30545	0	1	1
5SrRNA:CR33405	0	0	0	0	0	0	0	0	0	0	0	-1.30545	0	1	1
5SrRNA:CR33406	0	0	0	0	0	0	0	0	0	0	0	-1.30545	0	1	1
5SrRNA:CR33407	0	0	0	0	0	0	0	0	0	0	0	-1.30545	0	1	1
5SrRNA:CR33408	0	0	0	0	0	0	0	0	0	0	0	-1.30545	0	1	1
5SrRNA:CR33409	0	0	0	0	0	0	0	0	0	0	0	-1.30545	0	1	1
5SrRNA:CR33410	0	0	0	0	0	0	0	0	0	0	0	-1.30545	0	1	1
5SrRNA:CR33411	0	0	0	0	0	0	0	0	0	0	0	-1.30545	0	1	1
5SrRNA:CR33412	0	0	0	0	0	0	0	0	0	0	0	-1.30545	0	1	1
5SrRNA:CR33413	0	0	0	0	0	0	0	0	0	0	0	-1.30545	0	1	1
5SrRNA:CR33414	0	0	0	0	0	0	0	0	0	0	0	-1.30545	0	1	1
5SrRNA:CR33415	0	0	0	0	0	0	0	0	0	0	0	-1.30545	0	1	1
5SrRNA:CR33417	0	0	0	0	0	0	0	0	0	0	0	-1.30545	0	1	1
5SrRNA:CR33418	0	0	0	0	0	0	0	0	0	0	0	-1.30545	0	1	1
5SrRNA:CR33419	0	0	0	0	0	0	0	0	0	0	0	-1.30545	0	1	1
5SrRNA:CR33420	0	0	0	0	0	0	0	0	0	0	0	-1.30545	0	1	1
5SrRNA:CR33421	0	0	0	0	0	0	0	0	0	0	0	-1.30545	0	1	1
5SrRNA:CR33422	0	0	0	0	0	0	0	0	0	0	0	-1.30545	0	1	1
5SrRNA:CR33423	0	0	0	0	0	0	0	0	0	0	0	-1.30545	0	1	1
5SrRNA:CR33424	0	0	0	0	0	0	0	0	0	0	0	-1.30545	0	1	1
5SrRNA:CR33425	0	0	0	0	0	0	0	0	0	0	0	-1.30545	0	1	1
5SrRNA:CR33426	0	0	0	0	0	0	0	0	0	0	0	-1.30545	0	1	1
5SrRNA:CR33427	0	0	0	0	0	0	0	0	0	0	0	-1.30545	0	1	1
5SrRNA:CR33428	0	0	0	0	0	0	0	0	0	0	0	-1.21544	0	1	1
5SrRNA:CR33429	0	0	0	0	0	0	0	0	0	0	0	-1.30545	0	1	1
5SrRNA:CR33430	0	0	0	0	0	0	0	0	0	0	0	-1.30545	0	1	1
5SrRNA:CR33431	0	0	0	0	0	0	0	0	0	0	0	-1.30545	0	1	1
5SrRNA:CR33432	0	0	0	0	0	0	0	0	0	0	0	-1.30545	0	1	1
5SrRNA:CR33433	0	0	0	0	0	0	0	0	0	0	0	-1.30545	0	1	1
5SrRNA:CR33434	0	0	0	0	0	0	0	0	0	0	0	-1.30545	0	1	1
5SrRNA:CR33435	0	0	0	0	0	0	0	0	0	0	0	-1.30545	0	1	1
5SrRNA:CR33436	0	0	0	0	0	0	0	0	0	0	0	-1.30545	0	1	1
5SrRNA:CR33437	0	0	0	0	0	0	0	0	0	0	0	-1.30545	0	1	1
5SrRNA:CR33438	0	0	0	0	0	0	0	0	0	0	0	-1.30545	0	1	1
5SrRNA:CR33439	0	0	0	0	0	0	0	0	0	0	0	-1.30545	0	1	1
5SrRNA:CR33440	0	0	0	0	0	0	0	0	0	0	0	-1.30545	0	1	1
5SrRNA:CR33441	0	0	0	0	0	0	0	0	0	0	0	-1.30545	0	1	1
5SrRNA:CR33442	0	0	0	0	0	0	0	0	0	0	0	-1.30545	0	1	1
5SrRNA:CR33443	0	0	0	0	0	0	0	0	0	0	0	-1.30545	0	1	1
5SrRNA:CR33444	0	0	0	0	0	0	0	0	0	0	0	-1.30545	0	1	1
5SrRNA:CR33445	0	0	0	0	0	0	0	0	0	0	0	-1.30545	0	1	1
5SrRNA:CR33446	0	0	0	0	0	0	0	0	0	0	0	-1.30545	0	1	1
5SrRNA:CR33447	0	0	0	0	0	0	0	0	0	0	0	-1.30545	0	1	1
5SrRNA:CR33448	0	0	0	0	0	0	0	0	0	0	0	-1.30545	0	1	1
5SrRNA:CR33449	0	0	0	0	0	0	0	0	0	0	0	-1.30545	0	1	1
5SrRNA:CR33450	0	0	0	0	0	0	0	0	0	0	0	-1.30545	0	1	1
5SrRNA:CR33451	0	0	0	0	0	0	0	0	0	0	0	-1.30545	0	1	1
5SrRNA:CR33452	0	0	0	0	0	0	0	0	0	0	0	-1.29802	0	1	1
5SrRNA-Psi:CR33356	0	0	0	0	0	0	0	0	0	0	0	-1.30545	0	1	1
5SrRNA-Psi:CR33363	0.621683	0	0	0	0	0.123506	0	0	0.628992	0	-0.437097	-0.868537	0.112226	0.738557	1
5SrRNA-Psi:CR33371	0	0	0	0	0	0	0	0	0	0	0	-1.30545	0	1	1
5SrRNA-Psi:CR33416	0	0	0	0	0	0	0	0	0	0	0	-1.30545	0	1	1
7B2	375.289	366.641	362.154	393.96	384.328	427.948	423.604	361.037	343.115	402.005	-0.0541179	8.70109	0.455351	0.50159	1
7SLRNA:CR32864	0	0	0	0	0	0	0	0	0	0	0	-1.30545	0	1	1
7SLRNA:CR42652	0	0	0	0	0	0	0	0	0	0	0	-1.30545	0	1	1
825-Oak	0	0	0	0	0	0	0	0	0	0	0	-1.27624	0	1	1
a	36.6793	39.5923	36.9673	36.4369	35.5356	38.5339	34.9364	34.178	33.9656	36.8197	0.0470372	5.16355	0.219921	0.848826	1
a10	0.207228	0	0.626564	0.662489	0.397786	0.370518	0	0	0	50.8782	-4.66382	4.14282	4.30496	0.0409495	0.496349
A16	16.5782	15.4657	13.1579	17.6664	18.5634	15.5618	11.6455	13.3589	19.1843	14.7279	0.108887	4.08445	0.316215	0.575334	1
A2bp1	336.745	372.003	346.177	302.978	363.311	343.841	393.035	444.314	412.933	363.511	-0.18515	8.08675	1.93173	0.168108	0.727525
a5	0	0	0	0	0	0	0	0	0	15.0626	-6.78272	2.31086	4.44478	0.0380172	0.483585
a6	16.371	15.8782	13.1579	15.6789	16.1766	16.5498	13.1012	18.3902	20.1277	16.0668	-0.155932	4.12068	1.61221	0.20756	0.789284
Aac11	342.34	373.24	380.011	329.257	335.4	363.972	378.478	346.811	403.813	372.883	-0.0836759	8.32881	1.51308	0.221978	0.809292
Aatf	9.53247	12.1664	10.9649	9.93734	11.7347	10.6215	10.1898	6.7662	10.0639	8.70285	0.256425	3.48866	1.42815	0.235308	0.829203
Aats-ala	64.655	65.9872	53.8845	68.0156	71.4689	65.5817	61.1388	58.2934	56.9238	57.238	0.119652	5.90138	1.53318	0.218959	0.805307
Aats-ala-m	19.0649	19.3837	19.4235	22.083	24.1987	21.6136	26.2023	21.86	24.5307	24.1002	-0.146818	4.61228	1.97538	0.604122	1
Aats-arg	24.2456	23.7141	26.0024	20.5372	28.1102	21.243	14.5569	19.6046	17.9263	19.414	0.360102	4.53628	9.48585	0.00276965	0.128332
Aats-asn	79.161	97.3311	92.4182	106.882	98.5847	95.0997	84.4297	77.204	79.882	74.9784	0.204845	6.68002	3.07851	0.0828467	0.628587
Aats-asp	54.9153	56.5015	61.4033	52.3367	60.1983	56.8128	74.2399	48.0573	50.6338	46.192	0.0932326	5.76218	0.78983	0.376597	0.9227
Aats-cys	32.5347	24.539	27.8821	27.6037	28.8395	26.9243	27.658	27.0648	31.1351	21.7571	0.0758559	4.79195	0.488205	0.486589	1
Aats-gln	31.7058	28.0445	24.7493	26.7204	33.2151	29.2709	30.5694	20.1251	24.2162	25.1044	0.200136	4.91984	1.76636	0.187301	0.753626
Aats-glupro	105.686	114.034	114.975	115.052	114.496	105.721	85.8854	97.8496	97.8082	94.0577	0.216959	6.55566	5.8822	0.0173574	0.333572
Aats-gly	36.4721	35.2619	35.4009	35.9953	38.4527	34.3347	39.3035	34.0045	27.3611	39.8323	0.0778249	5.2344	0.449535	0.504328	1
Aats-his	69.8357	64.5437	69.5486	71.5489	77.7672	82.9961	80.0627	67.8354	63.5282	70.2922	-0.0359498	6.20688	0.171017	0.702398	1
Aats-ile	167.025	172.185	160.714	168.493	168.33	148.948	177.594	160.654	163.223	170.04	0.0355231	7.46732	0.189905	0.664073	1
Aats-leu	23.8312	21.0334	23.8094	29.5912	26.1876	24.0837	24.7466	23.9419	25.1597	22.7613	0.0513469	4.80907	0.268379	0.605734	1
Aats-lys	179.459	186.208	174.498	191.459	192.462	198.474	202.34	142.09	191.843	181.421	0.0202411	7.85531	0.0282649	0.866877	1
Aats-met	10.1542	9.89807	9.08518	12.1456	9.67946	10.745	2.91137	10.236	9.74937	7.02922	0.1658	3.32866	0.959772	0.640075	1
Aats-phe	40.2022	43.0979	51.3783	44.8285	46.0769	47.7968	62.5945	46.4959	48.7469	50.8782	-0.154439	5.58631	3.45286	0.0759145	0.613144
Aats-pro	7.46019	7.21735	6.89221	10.8207	9.21538	7.53387	13.1012	8.8481	8.80589	5.69032	0.0388624	3.24011	0.0598373	0.807328	1
Aats-ser	16.9927	14.4347	18.1704	18.108	15.9777	18.1554	23.291	17.3492	21.0712	18.4099	-0.196763	4.14288	2.80636	0.0974747	0.664138
Aats-thr	109.623	118.983	120.614	150.385	129.214	120.295	122.278	106.351	138.064	119.162	0.0559622	7.0199	0.363526	0.54812	1
Aats-trp	31.7058	24.7452	26.9423	30.6953	26.9832	31.6175	39.3035	28.7997	31.7641	32.4683	-0.182554	4.88986	2.79368	0.0982229	0.6667
Aats-tyr	50.3563	41.6544	42.9197	58.2991	56.353	44.4622	52.4047	36.7803	44.0294	53.556	0.142771	5.75944	1.82505	0.180209	0.743552
Aats-tyr-m	10.3614	10.5167	12.5313	9.05402	14.3203	12.7211	20.3796	11.624	14.1523	12.3848	-0.212881	3.8417	1.86721	0.555344	1
Aats-val	69.6285	69.4927	62.9697	68.0156	83.4025	84.9722	64.0501	70.0908	77.366	71.2964	-0.068449	6.21767	0.448145	0.504986	1
aay	134.491	125.169	130.325	132.056	144.595	101.769	133.923	142.958	150.644	170.71	-0.0676415	7.34883	0.189721	0.664226	1
ab	55.9515	53.6146	47.9322	56.9741	57.2812	46.8088	49.4933	52.2212	64.4717	52.8865	0.0316143	5.66372	0.109764	0.741208	1
ABCB7	75.8453	63.1002	61.4033	69.3406	64.7729	72.3745	82.974	62.8042	66.6731	71.9658	-0.0726831	6.25171	0.869448	0.353683	0.907858
abd-A	0	0	0	0	0	0	0	0	0	0	0	-0.907285	0	1	1
Abd-B	0	0.20621	0	0	0	0	0	0	0	0	1.20679	-0.982545	0.89093	0.349341	0.903636
Abi	48.9057	47.6345	45.4259	53.8825	49.8559	51.008	55.316	48.5778	58.1817	45.8573	-0.0635713	5.77172	0.579943	0.50601	1
Abl	160.809	167.855	146.303	156.789	167.137	181.06	148.48	168.114	171.715	166.358	-0.0720269	7.48554	0.703496	0.403905	0.950989
abo	9.94693	11.1353	11.5914	10.5998	8.48611	10.992	11.6455	9.36858	5.97542	8.36812	0.16447	3.41129	1.05671	0.743055	1
Abp1	39.166	54.2332	45.7392	50.57	51.1818	51.008	40.7592	40.7707	44.3439	47.5309	0.0903057	5.48132	0.703198	0.404005	0.950989
abs	20.3083	22.2707	19.4235	18.9914	25.6572	24.7012	14.5569	21.86	26.1032	22.7613	-0.089195	4.50635	0.644912	0.607425	1
ac	0	0	0	0	0	0	0	0.173492	0	0	-1.53675	-1.28411	2.51031	0.169634	0.727525
Ac13E	98.2259	115.89	92.7315	110.194	113.236	110.167	103.354	119.71	119.508	121.84	-0.121167	6.94107	1.24445	0.267681	0.881124
Ac3	283.073	323.543	310.149	287.741	285.345	326.674	355.187	345.596	316.697	321.336	-0.158863	8.03186	3.31194	0.0722104	0.597769
Ac76E	122.886	116.096	115.914	121.236	131.071	111.032	131.012	130.987	108.816	125.522	0.00793383	6.85816	0.0067495	0.934712	1
Ac78C	30.8769	32.375	36.0275	33.787	34.9389	37.1753	26.2023	38.8623	32.3931	30.46	-0.0176745	5.22541	0.0274437	0.868807	1
Acam	0	0	0	0	0	0	0	0	0	0	0	-1.30545	0	1	1
ACC	503.77	506.245	500.625	398.598	545.365	304.813	275.124	327.9	278.014	325.353	0.696295	8.90643	18.4564	4.50282e-05	0.0156914
AcCoAS	524.908	517.793	534.773	473.017	527.796	462.53	553.16	454.029	485.896	521.167	0.061384	9.16212	0.372246	0.54337	1
Ace	510.194	571.408	563.908	509.675	538.205	562.941	599.742	603.059	653.522	642.337	-0.185005	8.88857	2.92243	0.0909139	0.644425
Acer	66.1056	84.1336	84.5862	58.9616	104.949	41.251	36.3921	39.0357	41.5135	45.1879	0.963446	6.12843	14.4956	0.000260694	0.0363385
Acf1	46.8334	48.4593	31.3282	49.245	45.878	47.0558	40.7592	32.443	34.5945	56.5685	0.0746372	5.60763	0.264856	0.608106	1
achi	16.7854	16.4968	13.7844	14.7956	14.5855	15.6853	11.6455	14.7468	13.5233	15.7321	0.0610481	3.75878	0.180279	0.866669	1
acj6	25.489	27.0135	30.3884	27.6037	29.7677	30.6295	24.7466	31.5756	38.683	26.4433	-0.144506	4.6953	1.46482	0.229436	0.820618
Ack	150.033	151.358	140.35	163.414	159.048	164.14	165.948	155.449	140.894	168.367	-0.0528982	7.19358	0.490585	0.485532	1
Ack-like	81.4405	86.1957	78.3205	86.1236	85.2588	87.5658	77.1513	93.1653	94.0343	94.7271	-0.109639	6.48884	1.81383	0.18154	0.745734
Acn	230.23	264.361	251.252	264.112	262.141	281.964	234.365	227.101	293.11	292.215	-0.0672171	8.02257	0.21306	0.645529	1
Acon	1328.33	1069.2	1030.39	1378.86	1203.37	1130.2	1577.96	1364	1193.2	1305.76	-0.126579	10.3481	2.07277	0.15353	0.727525
Acox57D-d	10.5686	7.21735	12.5313	6.62489	13.9225	5.43427	2.91137	5.03127	3.45945	4.35142	1.16272	3.01144	19.8933	2.43064e-05	0.0114803
Acox57D-p	19.8939	16.9092	24.1227	13.2498	22.4086	14.4502	18.9239	16.4818	14.4668	15.3973	0.3177	4.5567	3.1113	0.0812545	0.628587
Acp1	11.1903	0.82484	1.87969	13.4706	41.5024	3.33466	64.0501	50.8332	35.538	140.919	-1.86695	5.03699	12.8558	0.000554138	0.0534558
Acp24A4	0	0	0	0	0	0	0	0	0	0	0	-1.0255	0	1	1
Acp26Aa	0	0	0	0	0	0	0	0	0	0	0	-1.29083	0	1	1
Acp26Ab	0	0	0	0	0	0	0	0.173492	0	0	-1.5368	-1.23446	2.25895	0.169634	0.727525
Acp29AB	0	0	0	0	0	0	0	0	0	0	0	-1.30545	0	1	1
Acp32CD	0	0	0	0	0	0	0	0	0	0	0	-1.30545	0	1	1
Acp33A	0	0	0	0	0	0	0	0	0	0	0	-1.29789	0	1	1
Acp36DE	0	0	0.313282	0.44166	0.0662977	0	0	0	0	0	2.66293	-0.929386	3.65293	0.0594149	0.549271
Acp53C14a	0	0	0	0	0.0662977	0.123506	0	0	0.628992	0	-1.72656	-1.19275	2.18755	0.14639	0.727525
Acp53C14b	0	0	0.626564	0.22083	0	0	0	0.346984	0	0	0.161515	-0.895409	0.0118781	0.913476	1
Acp53C14c	0	0	0	0	0.198893	0	0	0.173492	0.314496	0	-0.275708	-0.966979	0.0443539	0.961378	1
Acp53Ea	0	0.20621	0.313282	0	0.0662977	0.123506	0	0	0	0	0.786033	-0.984184	0.445677	0.555473	1
Acp54A1	0	0	0	0	0	0	0	0	0	0	0	-1.18854	0	1	1
Acp62F	0.414455	0	0	0	0	0.370518	0	0.173492	0	0	-1.09719	-1.13416	0.996574	0.323234	0.885465
Acp63F	0	0	0	0	0	0	0	0	0.314496	0	-1.59576	-1.10316	1.94661	0.169634	0.727525
Acp65Aa	2.2795	0.61863	1.87969	1.54581	2.32042	1.72908	1.45569	1.73492	5.66093	3.34725	-0.600346	2.47901	2.17591	0.143789	0.727525
Acp76A	0	0	0	0	0	0	0	0	0	0	0	-1.27716	0	1	1
Acp95EF	0	0	0	0	0	0	0	0	0	0	0	-1.14502	0	1	1
Acp98AB	0	0	0	0	0	0	0	0	0	0	0	-1.29789	0	1	1
Acph-1	18.0288	19.7961	19.7368	16.3414	19.4915	17.1673	17.4682	20.6456	20.4422	17.7404	-0.00995741	4.23042	0.00587693	0.939069	1
Acsl	351.458	434.072	412.906	335.882	416.814	307.16	314.428	345.596	296.57	322.005	0.298736	8.5732	6.00812	0.0162365	0.32682
Act42A	39.166	30.5191	42.9197	48.1409	40.4416	36.9283	40.7592	37.9948	38.054	53.556	-0.0382015	5.39883	0.0679582	0.794948	1
Act57B	1443.96	1038.47	1023.18	1435.84	1902.08	1527.65	2611.5	2790.27	1885.4	2493.03	-0.722893	10.9548	16.0085	0.000131922	0.0282906
Act5C	886.727	853.503	918.543	949.347	858.025	877.263	838.475	805.698	963.615	828.109	0.0498407	9.9438	0.545265	0.462242	1
Act79B	433.52	64.1313	16.9172	22.083	30.0992	408.805	138.29	600.803	60.6977	260.081	-1.40377	8.36959	2.57298	0.11232	0.702166
Act87E	253.854	122.695	112.468	136.914	158.982	223.175	232.91	315.062	178.319	301.587	-0.673755	8.18575	6.18554	0.0147845	0.3099
Act88F	9.7397	5.15525	1.87969	10.1582	3.11599	7.03984	8.73411	18.0432	6.60441	7.36395	-0.749367	3.61698	1.7699	0.186864	0.75263
Actbeta	144.645	154.657	133.771	148.839	138.032	143.514	138.29	170.89	173.287	140.25	-0.0967219	7.20421	0.645482	0.423918	0.968288
Actn	331.771	230.13	218.671	280.012	324.063	299.255	323.162	375.611	302.231	382.591	-0.280551	8.30717	3.16497	0.0787193	0.622916
Actn3	0.414455	0	0.313282	0	0	0	0	0	0	0	2.39681	-1.25495	3.46153	0.0853424	0.628587
ACXA	0	0	0	0	0.0662977	0	0	0	0	0	1.07441	-1.28427	1.3154	0.32055	0.882172
ACXB	0	0.41242	0	0.662489	1.12706	0.988048	0	0.693969	0.314496	0.66945	-0.29298	-0.188097	0.190402	0.663661	1
ACXC	6.21683	3.91799	4.07267	6.62489	4.24305	5.18725	7.27843	3.12286	2.83046	3.34725	0.319233	1.58053	0.869639	0.353631	0.907858
ACXD	2.2795	1.85589	3.13282	2.2083	2.7845	3.21116	0	4.16381	0.314496	2.6778	-0.0704325	1.66969	0.0476479	0.827718	1
ACXE	0	0	0	0	0.0662977	0	0	0	0.314496	0	-0.52293	-1.27726	0.196208	0.751481	1
Acyp	0	0	0	0	0	0	0	0	0	0	0	-1.30545	0	1	1
Acyp2	18.4433	23.0955	23.8094	19.8747	18.7623	16.4263	16.0125	21.513	15.7248	21.0877	0.166496	4.2141	1.44159	0.233135	0.827312
Ada	2.69396	1.03105	0.313282	2.42913	1.65744	1.9761	1.45569	2.08191	4.08845	1.67362	-0.469465	1.22826	1.42483	0.235848	0.829583
Ada1-1	0	0.20621	0	0	0.132595	0	0	0	0	0	2.16504	0.257103	3.83196	0.0853424	0.628587
Ada1-2	3.10841	2.88694	4.38595	5.29992	4.64084	2.84064	5.82274	4.3373	4.71744	4.0167	0.0141304	1.92399	0.00257199	0.959669	1
Ada2a	20.1011	19.3837	16.604	18.5497	20.6186	20.1315	11.6455	20.4721	20.1277	21.0877	-0.031966	4.3059	0.0610242	0.805465	1
Ada2b	26.3179	27.4259	22.8696	24.9538	26.6517	22.2311	18.9239	20.6456	20.1277	17.7404	0.348681	4.62074	4.61371	0.0344916	0.462851
Adam	80.4043	87.8454	88.6589	79.4987	91.093	84.8487	75.6956	67.1415	88.0589	91.0452	0.0681578	6.35124	0.301588	0.584292	1
AdamTS-A	50.978	36.7054	43.5462	36.6577	42.099	45.8207	36.3921	40.4237	33.9656	37.4892	0.0946985	5.25049	0.664739	0.576688	1
Adar	318.923	393.036	337.092	323.074	317.699	335.442	397.402	412.391	355.38	364.181	-0.140146	8.07901	0.830746	0.364571	0.912627
adat	9.53247	8.86702	11.9047	11.704	9.67946	9.75698	13.1012	14.9203	8.49139	14.0584	-0.21589	3.48332	2.06025	0.154764	0.727525
ade2	52.2214	36.9116	43.8595	44.166	56.6182	31.7411	29.1137	30.8816	26.7322	47.1962	0.494512	6.24837	3.047	0.0844096	0.628587
ade3	88.6934	53.2021	59.5236	46.5951	75.6457	28.2829	42.2149	31.5756	32.3931	49.874	0.86085	6.35801	6.71021	0.0112351	0.268471
ade5	104.857	99.5994	112.468	64.0406	155.733	36.8048	39.3035	44.2405	37.7395	62.9283	1.28137	7.20821	7.97554	0.00587512	0.187903
AdenoK	45.3829	47.6345	50.7517	40.8535	56.4856	34.3347	26.2023	32.6165	34.5945	34.4767	0.544814	5.52498	12.1973	0.00075388	0.0600483
Adf1	53.0503	43.7165	55.1377	50.57	48.5962	52.9841	52.4047	56.038	55.3513	50.8782	-0.0986508	5.6231	1.71928	0.19323	0.76528
Adgf-A	28.8046	24.3328	25.0626	28.487	37.2593	23.8367	26.2023	50.3127	19.8132	28.4516	-0.0634763	5.16835	0.102287	0.749867	1
Adgf-B	0	0	0	0	0.132595	0	0	0	0	0	1.64508	-1.27097	2.2937	0.160087	0.727525
Adgf-C	17.8216	23.0955	18.4836	23.1871	17.8341	17.2908	29.1137	18.9106	15.0958	18.4099	0.109135	4.22786	0.692929	0.407445	0.953534
Adgf-D	46.2118	39.3861	42.6064	37.9827	52.6404	28.0359	32.0251	26.0238	34.2801	34.4767	0.524572	5.49283	6.7522	0.0109927	0.264567
Adgf-E	0	0	0	0	0	0	0	0	0	0	0	-1.26896	0	1	1
Adh	8.08188	8.86702	3.4461	6.18323	8.22092	5.80478	7.27843	4.85778	7.23341	7.36395	0.188754	2.74188	0.62782	0.430307	0.975358
Adhr	0	0	0	0	0	0	0	0	0	0	0	-1.30545	0	1	1
AdipoR	321.41	388.293	415.099	283.766	425.101	251.829	270.757	287.824	262.919	288.533	0.429592	8.40093	8.0753	0.00558658	0.180751
Adk1	94.4958	72.1735	83.6463	91.2027	98.7173	102.387	126.645	107.739	100.953	118.158	-0.319642	6.8587	8.95699	0.00359517	0.147426
Adk2	58.231	56.7077	57.9572	54.545	64.9055	53.6016	49.4933	50.6597	59.1252	51.8824	0.138764	5.98828	2.14042	0.147059	0.727525
Adk3	12.6409	15.4657	11.9047	13.029	14.3866	14.0797	5.82274	16.3083	8.49139	10.3765	0.165416	3.90132	1.41106	0.426308	0.970846
AdoR	9.94693	11.5478	10.6516	14.7956	12.1325	12.1036	7.27843	14.5733	12.5798	9.70702	-0.0101666	3.65462	0.00590185	0.93894	1
adp	27.7685	21.4458	27.8821	30.9162	33.8781	27.1713	27.658	27.5853	26.1032	26.1085	0.0869069	4.9795	0.693412	0.407282	0.95344
AdSL	27.354	21.4458	20.3633	18.9914	25.5246	16.6733	13.1012	18.9106	19.8132	20.7529	0.318116	4.98217	1.21267	0.273836	0.882172
AdSS	133.869	128.881	136.591	131.615	150.695	157.347	144.113	159.092	113.848	150.626	-0.0905177	7.13285	1.05722	0.306694	0.882172
Ady43A	31.9131	31.9625	30.3884	34.2286	36.9941	32.1116	50.949	36.7803	34.909	31.4641	-0.105408	4.94961	0.827509	0.960479	1
Aef1	83.3055	81.4529	79.2604	74.1988	82.4743	83.8606	94.6195	82.2353	93.7198	84.0159	-0.119239	6.19739	2.50717	0.116951	0.711026
aft	13.8843	9.89807	13.1579	11.9248	10.475	10.004	5.82274	9.54207	10.3784	10.0417	0.284636	3.6584	3.16514	0.0884863	0.637282
Afti	87.2428	95.8876	89.912	89.4361	86.4522	93.0001	104.809	93.3388	90.5748	94.0577	-0.0742813	6.49132	0.789889	0.37658	0.9227
Ag5r	0.828911	0.82484	0.313282	1.10415	1.06076	1.35857	2.91137	0.693969	145.612	0.66945	-5.06051	5.38462	7.34191	0.00810997	0.222386
Ag5r2	0	0.20621	0.626564	0.22083	0.0662977	0.123506	0	0	0	0	1.46645	-0.242649	1.46572	0.229451	0.820618
AGBE	91.1802	72.7921	71.1151	65.8073	75.8446	71.757	61.1388	73.3872	63.2137	66.945	0.149946	6.55845	1.28857	0.259424	0.870604
ago	85.3778	76.5039	79.887	87.8903	87.3804	83.3666	88.7968	84.6642	80.8254	87.3632	-0.0209124	6.43563	0.0387076	0.844487	1
AGO1	432.07	530.784	480.888	422.447	453.675	443.881	470.186	481.441	491.243	494.054	-0.0375654	8.70067	0.143281	0.705961	1
AGO2	259.242	229.305	277.881	274.491	274.274	267.391	269.302	242.889	286.506	277.152	-0.0296795	8.02896	0.269593	0.872932	1
AGO3	10.9831	1.85589	2.50626	0.44166	3.58008	1.60558	1.45569	0.867461	0	1.00417	1.92913	1.72367	7.40504	0.00785207	0.218367
agt	8.08188	8.2484	6.89221	6.84572	7.55794	8.39841	10.1898	7.11318	8.49139	5.69032	-0.0287735	3.02149	0.0260125	0.872243	1
Ahcy13	38.3371	30.1066	27.8821	31.5787	48.1321	24.2072	20.3796	16.1348	22.6437	24.1002	0.726131	5.14826	7.86844	0.00620226	0.192835
Ahcy89E	17.4071	13.4036	16.9172	15.0164	12.3314	11.1155	10.1898	11.1035	9.43488	15.3973	0.362713	3.9297	4.81916	0.030802	0.443777
AIF	37.9227	33.1998	32.8946	36.2161	39.4471	34.0877	43.6706	34.8719	33.9656	36.1503	0.0136552	5.11289	0.0151308	0.902385	1
Ak6	5.18069	7.42356	8.45862	5.52075	5.56901	3.70518	17.4682	4.68429	3.45945	0.66945	0.560599	2.27996	4.35863	0.0397402	0.489611
Akap200	161.016	173.835	209.899	172.247	195.711	139.068	122.278	125.261	174.231	151.296	0.349679	7.18903	6.78907	0.0107843	0.261433
Akh	0.207228	0	0	0.22083	0.198893	0.123506	0	0.346984	0	0	0.0551795	-0.0962036	0.00206551	0.963854	1
AkhR	32.9492	41.8606	43.5462	29.1495	50.2537	18.4024	16.0125	15.0938	17.6118	17.4057	1.22267	5.25501	18.8193	3.84983e-05	0.0140471
akirin	104.857	110.941	105.889	85.9028	108.463	90.6534	85.8854	108.953	104.413	91.7146	0.0897166	6.41533	0.72559	0.396651	0.943046
Akt1	91.1802	106.817	100.25	84.7986	91.756	84.8487	61.1388	95.7677	102.211	84.0159	0.119491	6.42941	1.86139	0.175976	0.736548
al	1.03614	0.61863	0	1.32498	0.530382	0.864542	7.27843	0.520477	0.314496	1.00417	-0.637557	0.104309	1.10909	0.29519	0.882172
Alas	143.402	128.263	130.325	139.785	144.595	152.159	176.138	147.989	149.386	152.969	-0.171319	7.52471	4.14627	0.0447613	0.515294
alc	106.308	96.3	106.516	121.015	117.347	111.526	116.455	84.4907	112.59	108.451	0.0487221	6.94057	0.170062	0.681069	1
ald	2.07228	2.88694	4.69923	3.97494	4.04416	5.80478	4.36706	3.81683	3.14496	3.34725	-0.246889	2.20971	0.873981	0.352438	0.906819
Ald	1725.38	1518.53	1480.88	1519.75	1616.01	1539.38	2135.49	1906.85	1709.29	1699.06	-0.192251	10.6658	3.66321	0.0589075	0.548538
Aldh	615.673	526.866	517.229	542.579	636.458	461.048	545.882	564.023	459.479	621.919	0.0996469	9.09651	0.813811	0.369482	0.916825
Aldh-III	141.536	123.932	136.591	127.419	144.927	135.116	136.834	164.644	128.629	154.643	-0.0972422	7.27405	1.56487	0.214301	0.799465
Alg10	9.11802	7.42356	8.7719	7.72904	6.56347	7.78088	10.1898	6.41921	4.08845	6.6945	0.228787	3.09181	1.29774	0.356219	0.909679
Alg-2	43.3106	48.8717	57.3306	46.5951	44.9498	43.7211	39.3035	48.4043	37.425	35.1461	0.220602	5.25046	1.38953	0.241692	0.841264
Alh	117.291	106.198	101.19	114.39	118.408	132.398	126.645	126.823	126.742	130.543	-0.205839	6.99064	5.20027	0.0250226	0.395576
alien	52.4286	60.2133	62.9697	64.0406	55.0271	48.7849	50.949	47.0164	59.7542	52.5518	0.18568	5.71128	3.89282	0.0516612	0.522845
ALiX	125.787	119.189	123.12	122.119	126.562	140.303	135.379	129.252	119.194	123.179	-0.0674208	7.20162	0.692825	0.40748	0.953534
Alk	252.818	290.962	250.626	263.671	275.533	280.235	263.479	292.855	270.781	273.47	-0.0521084	7.92558	0.223881	0.637281	1
AlkB	4.14455	6.80493	5.01252	6.40406	7.35905	6.54582	2.91137	7.80715	5.03193	5.69032	-0.012659	2.43405	0.00304841	0.983832	1
alph	117.084	144.347	137.844	139.785	124.64	119.307	101.898	108.086	120.452	108.116	0.241253	6.87359	7.91948	0.00604406	0.190156
alpha4GT1	27.5613	29.0756	25.3759	26.7204	29.5025	26.5538	32.0251	29.8407	27.6756	25.1044	-0.00449295	4.83614	0.00136124	0.970653	1
alpha4GT2	0	0	0.313282	0	0.0662977	0.123506	0	0	0.314496	0	-0.480912	-1.23499	0.230734	0.654252	1
alpha-Cat	193.551	202.704	218.671	204.268	190.076	191.681	202.34	209.405	198.132	192.467	0.0218535	7.629	0.0544324	0.81607	1
alpha-catenin-related	86.4139	93.4131	95.5511	103.128	91.2256	97.4463	117.91	87.9605	99.3807	101.756	-0.0857075	6.6393	1.22603	0.271227	0.882172
alphaCOP	83.0983	88.6702	91.1651	98.9318	103.756	99.0519	87.3411	86.0521	86.4864	97.7397	0.0251816	6.68801	0.107147	0.744201	1
alpha-Est1	52.4286	44.7475	40.4134	40.191	58.8724	44.9562	45.1262	59.8548	43.7149	56.5685	-0.0827111	5.76452	0.413034	0.522121	1
alpha-Est10	17.1999	15.8782	18.1704	15.8997	14.4529	14.2032	10.1898	21.6865	12.8943	17.4057	0.0141334	4.06219	0.00641993	0.936322	1
alpha-Est2	13.4698	24.9514	24.1227	10.379	26.9169	6.0518	10.1898	8.32763	5.66093	10.7112	1.38179	4.11055	12.6839	0.000600335	0.0534558
alpha-Est3	14.5059	12.785	10.6516	18.5497	17.2374	19.761	23.291	14.9203	19.4987	18.0751	-0.311169	3.90687	3.6073	0.0608334	0.554045
alpha-Est4	1.24337	0.82484	2.50626	1.32498	1.79004	2.0996	0	2.42889	0.943488	1.3389	-0.149706	1.25973	0.184742	0.66839	1
alpha-Est5	5.38792	4.94904	5.95236	4.4166	6.56347	3.21116	0	2.60238	1.57248	4.35142	0.99109	2.35062	8.697	0.00409096	0.155909
alpha-Est6	0	0.20621	0	0	0.0662977	0	0	0	0	0	1.76508	-1.20678	2.21878	0.160087	0.727525
alpha-Est7	128.274	141.254	143.797	119.469	170.849	84.7252	103.354	108.78	89.3168	125.857	0.465237	6.97623	8.19566	0.00525796	0.1759
alpha-Est8	74.8092	81.6591	82.3932	82.5903	77.502	63.3586	72.7843	78.0715	76.108	84.6854	0.0891676	6.04423	0.625632	0.431109	0.975859
alpha-Est9	125.165	131.149	128.759	111.519	116.154	116.219	139.746	139.661	105.356	110.459	0.0120023	6.67177	0.0164852	0.898132	1
alphagamma-element:CR32865	0	0	0.313282	0.44166	0	0.123506	0	0	0.628992	0.334725	-0.807132	-0.860855	0.717419	0.39968	0.946412
alphaKap4	0	0	0	0	0	0	0	0	0	0	0	-1.30545	0	1	1
alpha-Man-I	187.955	219.407	199.247	184.172	196.97	211.319	216.897	231.439	223.292	212.216	-0.149515	7.51135	2.87383	0.0935997	0.653167
alpha-Man-Ib	94.2886	98.9807	106.516	104.452	92.8168	91.1475	97.5309	97.5026	95.2923	87.3632	0.0858391	6.69664	1.31568	0.254507	0.860375
alpha-Man-II	44.7612	40.2109	45.1126	42.841	42.2979	45.8207	48.0376	50.3127	48.1179	39.4975	-0.106535	5.58535	1.58265	0.211739	0.795187
alpha-Man-IIb	134.284	153.833	137.218	149.943	141.479	139.685	164.492	149.03	167.941	151.965	-0.102935	7.24135	1.69037	0.196979	0.77127
alphaSnap	509.987	537.177	547.617	540.591	498.691	540.833	564.806	508.159	555.085	513.803	-0.0253414	8.8774	0.136813	0.712367	1
alpha-Spec	670.796	719.26	665.725	731.388	702.822	722.757	599.742	666.384	626.161	762.838	0.0450215	9.43372	0.162952	0.687441	1
alphaTry	0.414455	0	0.626564	0.662489	0.464084	0.247012	0	0	0	0	1.91248	3.80672	0.273681	0.602498	1
alphaTub67C	9.7397	1.64968	3.13282	3.53328	6.29828	3.70518	1.45569	2.2554	2.51597	1.3389	0.971921	2.91972	3.50607	0.0644966	0.565675
alphaTub84B	900.819	823.602	793.231	966.572	919.615	931.112	930.183	823.741	882.79	914.468	-0.0247166	9.96489	0.131176	0.718092	1
alphaTub84D	117.705	109.91	105.263	136.252	122.187	121.159	167.404	117.281	119.823	135.564	-0.136709	7.14797	2.52743	0.115503	0.707983
alphaTub85E	4.14455	1.85589	2.19298	5.07909	3.11599	2.47012	8.73411	4.5108	4.40294	3.01252	-0.26898	1.55942	0.25416	0.615433	1
Alr	14.5059	14.6409	13.4711	15.0164	16.6407	17.1673	26.2023	10.93	16.0393	13.389	-0.0461313	4.03777	0.092981	0.761148	1
alrm	54.9153	50.5214	65.7893	75.5238	51.5133	34.0877	58.2274	52.5681	42.1425	58.5769	0.310131	5.76075	3.21703	0.0763431	0.614907
alt	122.057	131.768	125	122.561	132.529	117.331	112.088	101.84	132.088	111.129	0.141953	6.7302	1.00543	0.318775	0.882172
aly	0	0	0	0	0.132595	0	1.45569	0.173492	0	0	-0.737359	-1.19464	0.36003	0.654252	1
Ama	0.621683	0.61863	0.626564	0.883319	1.12706	0.61753	1.45569	1.04095	1.25798	2.34307	-0.564339	0.549713	0.772028	0.382006	0.929364
amd	5.18069	7.83598	10.6516	4.19577	8.02202	6.0518	7.27843	10.4095	5.03193	9.03757	-0.0936356	3.00778	0.167474	0.712833	1
amn	0.414455	0	0	0.22083	0.198893	0	0	0.173492	0.314496	0.334725	0.180121	-0.866817	0.0379928	0.845933	1
Amnionless	3.31564	4.1242	5.63908	5.29992	5.6353	4.81674	5.82274	4.5108	2.51597	3.01252	0.265971	2.53841	1.48701	0.22597	0.815091
amon	348.142	395.923	390.35	387.998	380.217	423.996	391.579	418.116	433.69	401.335	-0.122586	8.41766	3.17603	0.078208	0.620581
amos	0	0	0	0	0	0	0	0	0	0	0	-1.26955	0	1	1
AMPdeam	291.155	268.279	251.879	258.813	290.052	287.769	224.176	280.363	271.095	271.462	0.0200914	8.27517	0.15328	0.971175	1
Amph	244.529	255.288	266.29	240.042	247.092	234.414	286.77	296.325	257.887	247.362	-0.0744245	7.90393	0.913404	0.341856	0.898448
AMPKalpha	177.801	169.092	144.423	178.43	180.462	182.542	187.783	189.8	174.545	187.111	-0.114025	7.73229	3.21774	0.0763114	0.614907
Amun	121.85	113.622	118.421	135.81	127.822	126.841	120.822	99.758	129.258	123.179	0.0444636	6.95354	0.159846	0.690276	1
amx	11.6047	11.5478	11.2782	14.3539	12.2651	9.38646	2.91137	13.5324	9.74937	9.3723	0.291852	3.53417	3.47203	0.0657819	0.56993
Amy-d	3.52287	3.09315	3.75939	0.883319	4.50824	0.864542	1.45569	2.2554	1.25798	7.69867	0.41685	4.18998	0.117196	0.73292	1
Amy-p	0.621683	0.20621	0.626564	0	0.397786	0.123506	1.45569	1.04095	0.628992	4.35142	-1.61912	4.05434	0.390479	0.53368	1
Amyrel	0.207228	0	0	0	0.0662977	0.123506	0	0.520477	0.628992	0	-1.8959	-1.10889	4.20769	0.0441436	0.512711
ana	26.5251	30.1066	35.4009	24.7329	26.6517	23.2191	33.4808	24.8094	23.2727	27.4474	0.159918	4.602	1.61549	0.207103	0.788713
ana1	19.6866	18.7651	18.4836	20.9788	19.16	22.6016	16.0125	18.2167	20.7567	21.7571	-0.0683592	4.4177	0.211826	0.646486	1
ana2	3.10841	0.41242	3.4461	1.98747	1.45855	2.22311	1.45569	1.56143	3.45945	2.00835	-0.159632	1.6057	0.129856	0.719453	1
ana3	4.76624	4.1242	4.07267	3.97494	5.03863	4.56972	1.45569	3.64334	4.08845	3.68197	0.203925	2.39249	0.364184	0.547759	1
Ance	27.1468	21.4458	22.5563	26.2787	24.1987	24.2072	24.7466	27.9322	24.2162	23.7655	-0.0414367	4.75568	0.108816	0.742288	1
Ance-2	0.207228	0	0	0.22083	0	0	0	0	0	0	1.89147	-0.986552	2.32315	0.160087	0.727525
Ance-3	35.6432	37.324	30.7017	25.3954	32.7511	30.506	34.9364	44.067	25.1597	35.4808	-0.0714128	5.00663	0.242619	0.623559	1
Ance-4	26.9396	27.6321	36.0275	20.5372	45.7454	10.992	7.27843	8.8481	6.91891	12.3848	1.71378	4.81059	12.0923	0.000792022	0.0613341
Ance-5	27.7685	32.9936	38.5337	29.3704	47.4692	30.3825	10.1898	19.4311	19.4987	26.4433	0.638828	4.95008	8.79722	0.00389193	0.153629
Andorra	0.621683	0	0.313282	0	0.265191	0	0	0	0	0	3.40374	-0.947028	7.41376	0.00804211	0.221214
angel	7.66742	8.2484	6.26564	6.84572	9.08279	8.1514	13.1012	6.41921	9.74937	13.0543	-0.274438	3.31618	2.31205	0.443098	0.98822
Ank	704.367	790.815	725.875	699.81	665.496	663.969	745.311	840.223	733.719	656.73	-0.0212804	9.40695	0.0314775	0.859591	1
Ank2	1356.93	1565.55	1401.31	1491.71	1478.44	1636.33	1420.75	1313.86	1589.46	1520.32	-0.0368478	10.5443	0.111623	0.739107	1
Anp	0	0	0	0	0	0	0	0	0	0	0	-1.16203	0	1	1
Ant2	3.93733	2.68073	6.57893	3.53328	4.04416	4.0757	4.36706	3.46984	3.14496	3.34725	0.167714	2.25148	0.460134	0.545071	1
antdh	8.70356	4.94904	7.83205	5.07909	7.75683	13.7092	4.36706	6.93969	6.91891	23.7655	-0.77898	4.10634	1.52986	0.219456	0.805742
Antp	4.55901	2.47452	3.13282	1.98747	2.38672	4.69323	2.91137	4.85778	3.14496	3.34725	-0.48823	1.83749	1.69846	0.195921	0.769914
antr	0	0.41242	0.313282	0.22083	0.132595	0.123506	0	0.346984	0	0	0.417498	-0.352539	0.230513	0.727423	1
AnxB10	140.5	117.746	127.193	144.423	137.833	148.454	133.923	109.474	108.501	127.53	0.0929057	7.11947	0.616331	0.434542	0.977705
AnxB11	66.1056	73.4107	71.4283	65.5865	72.1319	69.2869	82.974	76.3366	72.0196	65.9408	-0.0571695	5.98859	0.429756	0.614432	1
AnxB9	249.917	239.616	269.109	279.571	248.815	246.395	267.846	268.219	210.712	223.931	0.0838607	7.88553	1.43071	0.234891	0.82879
aop	55.9515	61.863	57.6439	53.22	62.4524	54.3427	48.0376	67.1415	54.4078	69.288	-0.0293423	5.8666	0.0926584	0.918793	1
aos	26.9396	24.1266	27.8821	33.787	26.9169	27.9124	42.2149	31.7491	30.1916	25.1044	-0.118473	4.62307	1.26682	0.263453	0.875888
Aos1	16.9927	16.2906	15.9774	15.0164	15.6463	14.6972	14.5569	12.8384	13.5233	16.0668	0.16332	4.076	0.913643	0.341793	0.898448
ap	91.3874	100.012	96.4909	78.3946	102.231	83.4901	82.974	88.3075	76.737	71.2964	0.21923	6.32417	3.54959	0.0628932	0.561068
AP-1-2beta	123.3	123.932	120.927	147.293	138.297	133.263	154.303	128.905	136.177	153.304	-0.100795	7.1575	1.68377	0.423031	0.967328
AP-1gamma	138.221	154.657	158.208	140.889	150.562	149.442	119.366	159.092	164.167	147.279	-0.00817758	7.18281	0.0127464	0.91037	1
AP-1mu	61.7538	55.058	56.0775	66.0281	61.3254	61.506	77.1513	57.0789	59.7542	60.2505	-0.0422158	5.97381	0.254322	0.908926	1
AP-1sigma	118.327	118.777	117.481	102.023	106.938	106.833	131.012	128.905	116.363	105.438	-0.0543357	6.64705	0.210937	0.647177	1
AP-2alpha	254.89	263.949	263.157	253.071	264.462	259.733	288.226	283.66	272.353	285.52	-0.0944949	7.9051	2.42926	0.122712	0.724493
AP-2mu	93.8741	76.2977	92.105	94.736	96.3969	94.1116	136.834	102.881	92.4618	104.769	-0.198924	6.75881	7.64746	0.0122452	0.281355
AP-2sigma	55.9515	50.109	52.9447	58.5199	54.2978	55.3307	78.607	54.4765	57.5528	53.2213	-0.0959093	5.85736	1.08814	0.464027	1
Apc	188.163	200.848	173.872	202.059	200.02	207.367	192.15	206.456	195.931	218.91	-0.083593	7.69237	0.791681	0.376041	0.92189
APC10	8.91079	7.42356	7.20549	7.50821	7.95572	7.90439	2.91137	6.7662	8.17689	8.0334	0.0959578	3.01766	0.301637	0.608548	1
Apc2	4.76624	2.26831	4.07267	2.2083	4.83973	2.22311	0	1.04095	1.25798	2.6778	1.12191	1.89929	6.94855	0.00992937	0.251624
APC4	11.1903	10.3105	9.71175	9.71651	10.5413	13.3387	8.73411	9.36858	9.12038	8.36812	0.0247126	3.47742	0.0205119	0.886447	1
APC7	2.90119	1.44347	1.56641	0	2.12153	0.61753	1.45569	0.693969	0	0	1.77975	1.33568	5.23452	0.0245628	0.394473
ApepP	16.9927	14.4347	16.604	17.8872	14.1877	15.9323	17.4682	15.6143	14.4668	15.7321	0.0247288	3.92877	0.0219848	0.88247	1
Apf	12.2264	12.5788	10.6516	12.5873	10.8728	11.7331	4.36706	9.02159	13.5233	12.7195	0.0938108	3.66228	0.34079	0.677203	1
aph-1	10.9831	9.89807	10.025	10.5998	11.138	12.8446	10.1898	11.7975	11.3219	11.3806	-0.153505	3.69076	1.01434	0.316652	0.882172
Aph-4	69.4213	64.1313	57.6439	86.1236	75.1153	70.3984	77.1513	51.8742	70.4471	61.2546	0.114877	5.88498	0.985952	0.323482	0.885578
aPKC	221.319	236.935	213.345	211.113	220.374	266.897	254.745	265.096	260.717	247.696	-0.232538	7.76923	6.42191	0.0130586	0.290081
Aplip1	171.584	174.66	173.558	193.668	175.689	188.47	180.505	163.083	196.874	200.5	-0.0645557	7.53481	1.1243	0.291922	0.882172
Apoltp	198.317	254.875	264.723	206.034	418.736	150.43	84.4297	111.902	109.759	162.342	1.09482	7.65255	14.1985	0.000298483	0.0387033
app	262.35	311.583	285.087	276.921	271.489	294.315	304.238	304.826	281.159	278.491	-0.0548911	8.19102	0.320822	0.572569	1
APP-BP1	20.5155	23.5079	24.1227	26.4996	26.718	25.6893	20.3796	24.9829	27.0466	27.1127	-0.0695056	4.86748	0.457964	0.621699	1
Appl	962.987	1185.29	1130.64	1070.58	1100.41	1193.93	1020.44	1067.15	1140.68	1253.88	-0.0597667	9.98094	0.379676	0.539383	1
Aprt	9.94693	12.3726	10.3383	9.05402	12.5303	6.79283	5.82274	7.98064	8.17689	9.70702	0.476892	3.34876	6.75494	0.010977	0.264567
Aps	183.604	206.416	183.27	177.326	175.225	177.355	158.67	172.798	190.585	170.375	0.0841796	7.233	1.03211	0.312475	0.882172
apt	24.6601	21.652	22.5563	24.7329	23.1379	21.8606	27.658	22.207	27.0466	24.1002	-0.0433769	4.44823	0.0935529	0.976976	1
AQP	41.2383	24.9514	23.8094	32.0203	32.6185	28.7769	33.4808	48.7513	28.9336	33.4725	-0.168199	5.15248	0.691836	0.407813	0.953536
aqrs	0	0	0	0	0	0.123506	0	0	0	0	-1.48927	-1.27722	2.87106	0.169634	0.727525
ara	6.83851	8.66081	2.50626	6.18323	8.48611	7.65738	8.73411	9.02159	10.3784	8.70285	-0.377721	3.05996	3.89186	0.105603	0.684396
aralar1	145.681	126.407	143.483	127.419	142.938	105.721	122.278	112.77	108.187	114.811	0.291434	7.45101	6.54923	0.0122178	0.28111
Arc1	455.694	281.683	300.124	426.202	353.698	339.395	394.491	413.952	364.815	326.691	-0.01471	7.63497	0.00927137	0.923513	1
Arc2	7.04574	9.07323	6.57893	9.71651	5.96679	6.79283	2.91137	5.72524	4.40294	6.35977	0.418496	2.67511	2.94798	0.0895362	0.639484
Arc42	23.4167	19.1775	21.3032	20.9788	26.8506	19.0199	23.291	19.9516	17.9263	20.4182	0.192999	4.52978	1.51161	0.222201	0.809587
aret	79.7826	87.433	80.2002	68.4572	87.8445	75.3387	74.2399	91.6039	93.7198	77.3214	-0.037718	6.1867	0.09256	0.761673	1
Arf102F	104.443	91.7634	109.962	90.5402	86.9826	84.9722	107.721	109.127	97.1792	96.066	-0.0273627	6.379	0.0435178	0.83524	1
Arf51F	110.452	129.706	135.025	106.44	113.236	101.892	126.645	114.158	124.226	105.438	0.0645674	6.51724	0.393028	0.532351	1
Arf79F	262.143	283.539	312.969	270.517	281.832	243.554	227.087	255.207	303.803	249.37	0.136643	7.93139	3.20418	0.0769225	0.617289
ArfGAP1	44.7612	44.9538	47.3056	50.1284	56.0879	47.1793	52.4047	34.3515	47.8034	47.5309	0.11583	5.60212	0.906064	0.343793	0.899207
ArfGAP3	55.537	51.5525	40.4134	51.6742	57.2812	52.3666	36.3921	40.7707	53.4643	53.556	0.0949996	5.65245	0.888995	0.348356	0.902533
Arfip	41.2383	40.4171	37.5939	32.2412	37.6571	37.4223	42.2149	31.9226	34.2801	36.485	0.0787928	5.17456	0.849163	0.359332	0.911293
Arfrp1	15.3348	10.3105	15.3508	10.8207	13.6573	14.0797	16.0125	12.3179	8.49139	10.3765	0.131069	3.69199	0.715871	0.399818	0.946604
arg	2.90119	2.47452	3.4461	3.31245	5.6353	2.22311	5.82274	2.77588	1.88698	4.35142	0.33347	1.98033	0.616069	0.43464	0.977705
Argk	2248.01	2108.08	1963.97	2740.06	2383.93	2146.04	2870.61	2350.82	2070.33	2473.95	-0.0565764	11.2158	0.313836	0.576772	1
ari-1	139.671	147.852	146.303	148.839	140.816	140.92	128.1	149.55	162.594	158.325	-0.0403944	7.13816	0.355734	0.552431	1
ari-2	47.8696	45.5724	42.9197	50.1284	48.1321	50.514	42.2149	46.6694	56.9238	50.2087	-0.0863511	5.7276	1.14211	0.288158	0.882172
Ark	67.9707	74.0293	68.6088	78.8362	77.6346	81.02	78.607	80.8474	77.366	90.7104	-0.155349	6.31363	2.99798	0.0869059	0.633344
Arl1	23.4167	17.9403	13.1579	19.2122	21.9445	18.1554	20.3796	17.3492	20.7567	16.7362	0.0729017	4.3596	0.367697	0.545838	1
Arl2	12.4337	11.754	13.4711	11.704	11.2706	10.251	18.9239	11.4505	12.8943	10.0417	0.0340502	3.56968	0.0462042	0.830307	1
Arl4	116.047	115.065	134.398	111.298	110.187	108.932	148.48	135.324	142.781	117.488	-0.143357	6.69425	0.95423	0.331348	0.889978
Arl6	0.414455	0.82484	0.939847	0.883319	0.994466	1.60558	0	1.73492	0.628992	1.67362	-0.700169	0.782274	1.96714	0.164303	0.727525
arm	443.674	436.134	429.51	455.572	453.476	474.387	521.135	481.961	475.832	498.071	-0.142175	9.01024	6.23594	0.0143974	0.304457
armi	13.0553	12.5788	9.39847	11.4831	10.011	7.65738	5.82274	10.583	5.66093	6.6945	0.552976	3.43322	4.98256	0.0281675	0.421429
Arp1	86.8284	87.2268	76.7541	85.9028	89.2367	85.8367	80.0627	74.7751	79.253	88.7021	0.060538	6.47141	0.768645	0.383046	0.929667
Arp10	25.2818	21.2396	17.5438	26.9412	24.0661	26.6773	23.291	20.4721	24.2162	23.4307	-0.0333129	4.72694	0.0680297	0.794843	1
Arp2	82.0621	77.3287	79.2604	87.2278	84.6622	83.1196	96.0752	94.2063	77.366	76.9867	-0.0477023	6.16738	0.426259	0.515549	1
Arp3	41.4455	39.3861	40.1001	40.191	38.8505	37.4223	49.4933	36.0864	41.828	41.1712	-0.00805421	5.28579	0.00910181	0.924213	1
Arp5	15.7493	15.672	15.3508	18.7705	17.2374	14.2032	10.1898	13.5324	17.6118	14.3932	0.202549	4.0509	1.32682	0.252521	0.856881
Arp53D	0.414455	0	0	0	0.132595	0.123506	0	0	0	0	1.03661	-1.19604	0.912075	0.362573	0.911293
Arp6	14.9204	14.8471	17.8571	18.3289	17.9004	17.0438	20.3796	14.9203	13.8378	13.389	0.121476	4.17904	0.817514	0.3684	0.916383
Arp8	7.87465	6.59872	6.89221	8.1707	7.55794	8.39841	5.82274	7.11318	5.66093	9.03757	-0.00315633	3.01342	0.000301035	0.986197	1
Arpc1	85.3778	75.0604	72.6815	93.1902	89.8997	88.8008	75.6956	73.5607	87.7444	76.9867	0.0430101	6.56573	0.149863	0.699609	1
Arpc2	57.1948	44.9538	54.5111	43.7243	47.9332	45.3267	30.5694	46.6694	46.8599	42.8448	0.181565	5.46517	1.6717	0.199447	0.775488
Arpc3A	15.7493	14.6409	13.4711	15.0164	14.3203	18.4024	17.4682	20.1251	16.3538	16.7362	-0.294142	4.00816	5.59605	0.0202187	0.360937
Arpc3B	1.45059	1.44347	3.4461	1.54581	1.06076	1.72908	1.45569	1.21445	0.314496	3.01252	0.114743	0.919506	0.0727808	0.846412	1
Arpc4	23.0023	26.6011	27.5688	28.9287	27.0495	29.1474	30.5694	19.7781	27.6756	23.7655	0.0524873	4.74355	0.142055	0.707163	1
Arpc5	17.4071	15.8782	19.4235	15.2373	20.2208	16.3028	29.1137	14.3999	16.9828	15.7321	0.0557289	4.16825	0.146668	0.702672	1
arr	54.0864	51.1401	50.1252	53.8825	54.8945	50.1435	43.6706	60.2018	48.7469	50.8782	0.0384783	5.78432	0.178044	0.674098	1
Arr1	5702.9	6280.33	6321.41	6678.11	5624.5	6347.59	6476.34	5493.11	6265.07	5291.67	0.0351246	12.5268	0.155271	0.694511	1
Arr2	7461.23	8527.19	8359.94	8355.76	7317.15	8088.41	7307.54	6939.69	7388.77	6026.39	0.16277	13.0717	3.22709	0.0758934	0.613144
Ars2	126.823	151.564	150.062	138.46	132.595	129.558	106.265	116.76	126.742	126.191	0.196578	7.07035	6.33167	0.0136912	0.297418
Art1	22.795	22.2707	19.4235	18.9914	23.2042	21.7371	13.1012	20.6456	18.8698	20.7529	0.110385	4.50151	0.488969	0.486249	1
Art2	1.65782	0.41242	0.939847	1.98747	1.06076	1.35857	1.45569	1.73492	2.20147	1.67362	-0.480604	0.830367	1.82598	0.180099	0.743552
Art3	14.0915	12.1664	12.8446	11.704	14.6518	12.8446	8.73411	10.0625	13.2088	10.3765	0.208157	3.50627	1.28259	0.260524	0.871556
Art4	23.624	26.1887	20.6766	17.6664	23.602	20.502	21.8353	25.5034	20.1277	19.414	0.0596495	4.58906	0.192357	0.662047	1
Art6	0	0	0	0	0	0	0	0	0	0	0	-1.30545	0	1	1
Art7	10.7758	10.7229	7.20549	9.71651	9.28168	9.63347	10.1898	11.1035	12.2653	11.0459	-0.178114	3.53121	1.02552	0.314016	0.882172
Art8	3.52287	3.71178	3.13282	5.74157	4.64084	4.32271	1.45569	3.12286	3.45945	1.67362	0.414597	1.92242	2.35465	0.128532	0.727525
Art9	0	0	0	0	0	0	0	0	0	0	0	-1.30545	0	1	1
aru	52.843	50.109	53.8845	62.4948	54.0326	52.1196	39.3035	49.0983	55.3513	54.2254	0.100597	5.76068	0.623039	0.432062	0.976128
arx	6.0096	3.71178	5.95236	5.07909	5.03863	3.45817	4.36706	3.29635	5.97542	3.34725	0.372617	2.207	2.07356	0.153453	0.727525
ARY	0	0	0	0	0	0	0	0	0	0	0	-1.30545	0	1	1
Asap	140.086	135.892	124.06	137.798	138.562	156.359	160.125	149.03	137.749	137.907	-0.126431	7.20559	3.269	0.0740492	0.6045
Asator	616.709	699.464	689.534	636.873	620.414	692.004	767.146	800.666	766.427	743.759	-0.208192	9.23876	4.73479	0.0322637	0.447754
Asciz	7.46019	6.59872	7.51877	6.84572	7.49164	7.41036	0	7.98064	6.91891	7.36395	0.0569061	3.11856	0.0809123	0.973571	1
ase	0	0.20621	0	0	0	0	0	0	0	0	1.20798	-1.14381	0.957504	0.332808	0.890522
asf1	16.371	16.4968	19.7368	13.029	16.3755	14.4502	18.9239	12.6649	12.8943	14.3932	0.215403	3.97402	1.80315	0.182818	0.747859
ash1	73.3586	77.5349	77.0674	77.0696	70.4082	71.6335	65.5058	73.9077	71.3906	81.3381	0.0336796	6.21808	0.139849	0.977341	1
ash2	35.0215	26.1887	34.461	30.4745	31.4914	28.5299	39.3035	27.4118	26.7322	30.46	0.0980947	5.04346	1.11953	0.292943	0.882172
asl	3.7301	2.26831	4.38595	3.75411	4.17676	4.81674	2.91137	2.77588	3.77395	3.34725	-0.00056449	2.14875	3.36846e-06	0.99854	1
asp	7.66742	0.61863	1.87969	1.32498	3.71267	1.23506	0	0.173492	0.628992	0.66945	2.13759	1.92596	7.31498	0.00822265	0.223643
asparagine-synthetase	77.9176	79.8032	86.4659	98.0484	78.0987	72.3745	80.0627	76.857	71.7051	78.6603	0.15165	6.30438	2.72012	0.10269	0.676977
Asph	130.139	100.012	116.228	131.835	124.308	122.518	113.543	150.244	124.226	154.308	-0.15202	7.07952	1.67613	0.198858	0.773919
ASPP	64.4478	67.6368	65.1627	65.1448	69.0822	73.2391	58.2274	67.1415	72.3341	69.6228	-0.0554671	6.11922	0.245561	0.621465	1
asrij	20.3083	18.9713	24.1227	26.2787	21.0827	21.8606	24.7466	20.2986	19.4987	24.1002	0.0215408	4.47681	0.0288401	0.882258	1
ast	7.66742	11.3415	10.025	9.49568	10.8728	10.1275	10.1898	7.11318	8.17689	7.02922	0.24472	3.27704	2.1926	0.142281	0.727525
AstA	63.8261	61.2443	74.8744	69.3406	63.3143	66.0757	68.4172	75.6426	55.9803	73.6395	-0.0345753	5.89274	0.122147	0.727561	1
AstA-R1	14.9204	19.3837	14.7243	13.029	17.4363	20.6255	17.4682	22.0335	13.5233	14.3932	-0.164942	3.91524	0.769382	0.382819	0.929667
AstA-R2	0.207228	1.44347	0	0.883319	1.25966	0.494024	2.91137	1.38794	0.314496	1.67362	-0.283651	0.916377	0.285377	0.968078	1
AstC	119.156	143.522	146.303	126.756	130.673	149.689	163.037	150.418	144.668	137.907	-0.157151	6.88144	2.6777	0.105368	0.684032
AstCC	0.414455	0.41242	0.939847	0.662489	0.994466	0.741036	1.45569	0.346984	0.943488	0.66945	0.0229876	0.365133	0.00215989	0.963038	1
AstC-R1	78.5393	89.0827	76.7541	71.7697	80.2202	86.5777	96.0752	85.5317	89.0023	80.6687	-0.133367	5.60065	1.40406	0.239265	0.836579
AstC-R2	16.9927	24.1266	22.8696	13.4706	18.8285	18.7729	32.0251	20.8191	23.5872	22.7613	-0.224623	4.10071	2.42651	0.122922	0.724493
asun	10.1542	9.07323	10.3383	9.93734	9.28168	8.76893	7.27843	8.67461	7.5479	10.0417	0.169023	3.42913	1.50379	0.297835	0.882172
Asx	81.8549	86.4019	82.7065	79.4987	87.2478	82.3785	66.9615	89.3485	89.6313	85.3548	-0.00487154	6.38856	0.00267746	0.958851	1
Atac1	4.35178	4.33041	5.95236	6.18323	7.62424	5.31076	5.82274	5.55175	5.97542	5.02087	0.0812423	2.59425	0.187686	0.66592	1
Atac2	7.87465	7.42356	10.025	9.71651	9.34798	9.88048	5.82274	10.583	10.3784	7.36395	-0.0763158	3.47627	0.294975	0.588436	1
Atac3	18.4433	14.4347	15.3508	13.029	14.9833	15.0677	20.3796	15.0938	15.0958	12.7195	0.015356	3.95047	0.0124321	0.911477	1
ATbp	9.11802	8.04219	9.08518	9.93734	9.48057	9.50997	16.0125	7.11318	8.49139	5.02087	0.134703	3.09212	0.530324	0.468422	1
Ate1	55.537	56.0891	57.9572	57.4157	61.0602	57.5538	74.2399	54.4765	65.7296	51.5476	-0.043781	5.8801	0.21933	0.64072	1
Atet	120.399	119.602	130.012	142.214	122.187	118.319	164.492	122.659	128.629	134.894	-0.0571231	7.07133	0.560023	0.983302	1
Atf-2	15.3348	11.3415	11.5914	11.4831	14.4529	13.8327	10.1898	10.93	16.6683	16.0668	-0.0937357	3.85457	0.388876	0.818357	1
Atf3	80.6116	85.9895	86.4659	84.357	83.1373	82.9961	59.6831	100.105	81.4544	78.3256	0.0315286	6.17719	0.0935516	0.760439	1
Atf6	139.879	166.411	161.34	136.914	137.037	134.869	151.391	176.442	147.184	119.162	0.0242374	6.76548	0.0165668	0.897882	1
Atg1	134.076	142.491	146.929	137.798	136.838	145.243	125.189	140.876	146.555	143.932	-0.0164231	7.17093	0.0689246	0.793528	1
Atg10	2.69396	1.64968	2.81954	3.09162	2.18782	1.9761	5.82274	1.73492	2.51597	1.3389	0.197478	1.76524	0.328247	0.568168	1
Atg101	80.6116	80.6281	83.0198	78.3946	81.6125	81.6375	88.7968	89.522	96.5502	84.0159	-0.121779	6.32034	3.07243	0.0831459	0.628587
Atg12	14.7132	15.4657	14.411	16.3414	12.7292	15.4383	14.5569	16.1348	13.5233	13.0543	-0.0019759	3.91794	0.000216225	0.988301	1
Atg13	42.0672	41.242	33.8345	39.0869	37.5245	35.6932	29.1137	41.9851	36.4815	35.4808	0.0863257	5.16599	0.613657	0.455551	0.999738
Atg14	41.6528	37.324	35.7142	45.4909	37.6571	38.4104	42.2149	31.2286	34.909	32.803	0.165502	5.30432	2.41269	0.123978	0.727106
Atg16	19.0649	17.3216	20.0501	18.9914	20.0882	19.6375	13.1012	18.2167	19.8132	18.0751	0.0544436	4.42293	0.253509	0.660844	1
Atg17	121.85	129.087	125	121.456	127.093	113.008	100.442	111.902	115.106	125.522	0.133363	6.9428	3.16262	0.0788286	0.622916
Atg18a	78.332	73.6169	82.7065	66.2489	87.7782	77.1913	82.974	87.0931	79.882	87.3632	-0.0895812	6.4414	1.54706	0.619812	1
Atg18b	60.7177	56.2953	60.4635	47.6992	55.0934	63.7291	81.5184	71.1318	61.6412	62.2588	-0.258674	5.92619	7.70725	0.00673077	0.201405
Atg2	80.8188	93.8255	92.105	94.5152	109.192	83.8606	80.0627	81.3678	68.5601	83.3465	0.246039	6.53181	9.86228	0.00230377	0.117128
Atg3	32.9492	37.1178	41.6665	38.6452	36.4637	32.2351	34.9364	28.2792	37.425	34.4767	0.169749	5.16952	1.83995	0.178459	0.741621
Atg4a	43.3106	44.9538	49.1853	50.3492	56.6182	47.5498	61.1388	43.8935	39.941	46.5268	0.0762915	5.82993	0.416664	0.520302	1
Atg4b	33.1564	38.5612	40.1001	39.3077	35.9997	41.1275	37.8478	40.4237	33.6511	38.8281	-0.0466055	5.39688	0.29775	0.58669	1
Atg5	19.0649	23.3017	15.0375	15.4581	18.6297	19.3904	14.5569	21.513	15.7248	18.4099	-0.00816615	4.23398	0.0050073	0.943749	1
Atg6	27.1468	26.6011	26.9423	27.8246	25.4583	26.8008	23.291	20.1251	22.3292	24.7696	0.184993	4.79268	2.89732	0.0922907	0.649584
Atg7	17.1999	15.4657	17.2305	18.5497	17.3037	19.3904	21.8353	16.6553	16.9828	15.7321	-0.0474702	4.12857	0.109993	0.740948	1
Atg8a	518.069	500.471	571.427	514.754	532.437	513.291	673.982	613.989	574.27	523.51	-0.133074	9.03773	2.17524	0.14385	0.727525
Atg8b	0	0.20621	0	0.662489	0.198893	0.123506	0	0.173492	0	0	1.04502	-0.928699	0.924356	0.339416	0.896198
Atg9	37.9227	34.2308	34.7743	36.2161	40.9057	42.9801	36.3921	35.0454	31.7641	37.8239	-0.00239778	5.47401	0.000503489	0.982149	1
atilla	109.416	89.7013	98.6839	93.8527	96.2643	88.4303	112.088	110.688	86.8009	93.3882	0.00230807	6.80831	0.000518754	0.981881	1
atk	1.45059	0.61863	0.939847	1.98747	0.86187	0.123506	0	0.346984	1.25798	1.00417	1.10293	1.81729	0.989781	0.322549	0.884766
atl	128.274	123.932	111.842	122.34	131.269	129.434	129.556	129.078	115.734	117.154	-0.00401129	6.94355	0.00272561	0.958483	1
atms	39.5805	35.6743	30.3884	41.7368	40.7731	40.263	34.9364	34.0045	45.9164	43.849	-0.0851591	5.28974	0.595938	0.657555	1
ato	0.207228	0.41242	0.313282	0.22083	0.596679	0.61753	2.91137	0.346984	0.628992	0.334725	-0.655039	-0.194208	1.08678	0.454944	0.998951
Atox1	74.3947	88.2578	75.501	84.5778	74.5186	79.9084	91.7082	65.58	89.0023	74.9784	0.00333661	6.13471	0.00137758	0.970478	1
ATP7	48.6985	44.9538	47.6189	39.0869	44.8835	46.1913	32.0251	46.3224	42.1425	41.8406	0.0719125	5.43623	0.551037	0.826403	1
Atpalpha	4553	4909.03	4724.92	4918.98	4821.1	4708.42	4895.47	5071.18	5463.11	5394.43	-0.093754	12.1995	1.51894	0.221094	0.807587
ATPCL	305.868	313.439	310.776	309.603	322.605	296.044	328.985	312.459	291.538	333.051	0.0028199	8.3503	0.00180407	0.966218	1
ATPsyn-b	461.081	387.468	395.049	492.892	487.819	424.12	637.59	436.159	426.456	544.263	-0.141457	9.00558	1.62592	0.205657	0.786864
ATPsyn-beta	2565.48	2104.99	2205.82	2642.01	2411.98	2114.42	3238.9	2719.84	2268.14	2579.06	-0.113698	11.3167	1.17609	0.281143	0.882172
ATPsyn-Cf6	273.126	231.367	249.686	301.654	267.776	236.267	337.719	247.747	258.516	297.57	-0.0461977	8.10439	0.165126	0.685476	1
ATPsyn-d	305.661	225.181	271.302	361.057	329.102	270.108	419.237	263.361	313.238	368.532	-0.117871	8.43465	0.810349	0.370497	0.91775
ATPsyn-gamma	436.836	331.379	364.034	461.976	450.493	389.168	591.008	396.95	429.916	480.33	-0.152142	8.91584	1.87089	0.174889	0.735571
AttA	7.46019	6.80493	6.89221	5.74157	8.41981	4.94024	1.45569	6.7662	2.83046	3.34725	0.652194	4.78178	0.246651	0.620693	1
AttB	3.7301	4.33041	3.75939	4.85826	4.30935	4.32271	1.45569	2.94937	0.314496	3.34725	0.523893	4.39467	0.175392	0.676394	1
AttC	2.2795	7.01114	3.4461	1.98747	8.41981	1.60558	0	1.38794	0	1.67362	2.05758	6.12878	0.836665	0.362875	0.911469
AttD	0	1.64968	0.313282	0	0.0662977	0.123506	0	0.173492	0	0	1.62937	1.06325	0.598644	0.441189	0.986333
att-ORFA	13.0553	12.9912	18.7969	17.8872	14.7181	11.1155	10.1898	18.2167	11.0074	14.3932	0.196309	3.80582	1.75392	0.188846	0.756418
att-ORFB	0	0	0	0	0	0	0	0	0	0	0	-1.30545	0	1	1
Atu	16.1638	16.4968	16.2907	16.1206	20.2871	20.1315	10.1898	9.54207	18.8698	20.4182	0.0658064	4.09064	0.0872651	0.768386	1
Atx-1	0	0.20621	0.626564	0	0.0662977	0.494024	0	0.173492	0.314496	0	-0.869446	-0.653065	0.934426	0.33639	0.893707
Atx2	150.24	176.516	156.954	181.964	182.518	178.219	161.581	175.748	182.722	185.438	-0.0630632	7.46295	0.574919	0.450356	0.995113
Atxn7	26.1107	26.3949	26.0024	32.0203	30.6958	28.9004	32.0251	24.6359	28.3046	26.778	0.0360515	4.9602	0.0894727	0.76556	1
aub	8.28911	3.29936	5.95236	3.53328	4.83973	4.0757	2.91137	3.64334	3.14496	2.34307	0.606305	2.02395	1.99922	0.160941	0.727525
aur	4.97346	1.44347	1.87969	3.75411	2.25412	2.96415	1.45569	1.73492	2.51597	1.67362	0.351024	1.65133	0.650334	0.422188	0.966726
aust	0	0	0	0	0	0	0	0	0	0	0	-1.2841	0	1	1
aux	98.6404	90.9386	91.7917	96.5026	101.833	92.506	96.0752	111.902	103.469	115.145	-0.11734	6.7132	2.4547	0.120797	0.72117
ave	11.1903	12.1664	10.025	9.49568	10.6739	9.01594	16.0125	11.1035	9.43488	11.0459	0.01825	3.37612	0.0133792	0.908181	1
Aven	5.18069	5.56767	6.89221	8.1707	6.89496	7.78088	5.82274	6.41921	7.23341	4.35142	0.00547335	2.89853	0.00117056	0.972785	1
awd	265.873	215.902	231.516	247.55	294.097	221.693	225.631	199.169	200.648	192.467	0.277097	8.05745	4.94713	0.0287177	0.426285
Awh	7.46019	4.53662	5.01252	6.62489	5.7016	6.0518	8.73411	6.5927	6.60441	3.01252	-0.00696726	2.63882	0.00107294	0.973944	1
Axn	79.5754	78.7722	83.3331	73.3155	82.6069	82.008	90.2525	85.1847	94.3488	79.3298	-0.110617	6.35691	2.84214	0.095398	0.657389
axo	113.975	117.127	126.566	115.715	114.231	108.438	94.6195	106.871	97.4937	89.7063	0.232318	6.47757	4.77797	0.0315066	0.446886
Axs	25.2818	25.9824	27.8821	30.9162	30.2318	31	30.5694	37.6478	22.3292	33.4725	-0.150705	5.12823	1.69767	0.196024	0.769914
Axud1	40.8238	37.324	36.654	34.8911	39.5134	41.004	27.658	36.9538	38.9975	30.46	0.0735577	5.5303	0.699875	0.62416	1
az2	8.49633	9.89807	9.39847	10.8207	10.6076	11.7331	10.1898	9.19509	13.5233	10.7112	-0.170077	3.5311	1.25108	0.271738	0.882172
b	30.6697	24.3328	21.9298	25.1746	25.0605	33.9642	17.4682	29.3202	20.7567	25.7738	-0.0726183	5.05224	0.176474	0.675455	1
B4	207.849	224.975	218.044	198.526	209.633	211.072	196.517	222.417	224.236	213.22	-0.0159526	7.49599	0.0280102	0.867473	1
B52	553.712	529.753	531.327	556.933	555.906	585.542	593.92	560.206	542.191	559.995	-0.0581958	9.13884	0.949102	0.332644	0.890522
b6	2.07228	2.26831	1.56641	0.662489	1.06076	1.35857	0	1.56143	1.88698	1.3389	0.0428809	1.48118	0.012894	0.909854	1
bab1	11.1903	15.0533	17.5438	13.9123	13.2595	15.4383	17.4682	15.6143	19.1843	13.7237	-0.193659	3.74809	1.45302	0.231306	0.824547
bab2	43.1033	47.8407	52.0048	46.5951	49.3918	53.2311	48.0376	54.997	48.1179	57.238	-0.142981	5.59599	2.01347	0.159474	0.727525
babo	156.457	169.917	174.811	174.235	160.639	165.745	179.049	191.882	168.884	159.329	-0.0481397	7.33847	0.256876	0.613554	1
babos	37.301	31.1377	37.2806	33.3453	38.7842	26.3068	33.4808	27.0648	26.7322	31.7989	0.326089	5.25649	2.65193	0.107033	0.688592
Bacc	621.89	758.852	786.025	595.136	621.077	659.646	615.755	671.241	698.81	636.312	0.0421202	9.05547	0.239453	0.625831	1
Bace	0.414455	0	0.313282	0.22083	0.596679	0.123506	0	0	0.628992	0.334725	0.871796	2.47841	0.192503	0.661927	1
baf	26.5251	26.3949	32.5813	29.3704	28.9721	23.7132	26.2023	23.4214	23.9017	21.7571	0.286489	4.7054	4.69702	0.0329418	0.452396
bai	70.8719	68.4617	76.4409	75.5238	72.6623	65.9522	62.5945	64.3656	69.1891	70.9617	0.121701	6.16706	2.30434	0.132632	0.727525
Baldspot	201.011	228.687	247.806	206.034	206.12	201.932	202.34	212.528	223.292	205.856	0.0564271	7.46264	0.33097	0.56657	1
ball	8.70356	7.83598	5.95236	5.9624	7.16015	7.03984	4.36706	3.81683	4.08845	5.69032	0.461535	2.8849	2.45776	0.120568	0.720673
bam	0.828911	0.41242	0	0	0.596679	0.123506	0	0	0	0	2.63179	-0.288454	4.62982	0.0348148	0.463652
ban	0	0	0	0	0	0	0	0	0	0	0	-1.30545	0	1	1
bap	0.828911	1.03105	0.313282	1.32498	0.662977	1.11155	1.45569	1.04095	0.314496	0.66945	-0.0813199	0.41652	0.0309426	0.860776	1
Bap170	33.3636	30.1066	30.7017	33.5661	37.3256	40.263	26.2023	33.484	37.425	36.485	-0.108571	5.34873	0.75285	0.387958	0.933897
Bap55	20.5155	14.2285	17.8571	20.5372	18.6297	16.7968	20.3796	17.0022	19.8132	15.7321	0.0630714	4.25141	0.211548	0.646702	1
Bap60	38.3371	36.4991	36.0275	34.0078	37.6571	37.2988	24.7466	28.7997	33.9656	36.8197	0.139999	5.28485	1.4943	0.224845	0.813601
barc	71.0791	75.679	78.3205	73.978	67.1596	77.8088	58.2274	57.5994	73.592	66.945	0.113042	6.01279	0.794393	0.375228	0.921556
barr	7.66742	7.83598	7.20549	8.39153	8.41981	7.65738	4.36706	6.24572	8.49139	6.35977	0.188659	3.08627	0.712357	0.400973	0.947861
baz	70.8719	69.4927	60.7767	65.8073	66.1651	71.016	56.7717	84.6642	71.7051	63.263	-0.0847414	6.09482	0.6553	0.420428	0.96518
bbc	193.136	203.529	213.345	214.426	199.291	201.438	196.517	201.945	189.327	197.822	0.0514413	7.60362	1.25827	0.384587	0.93118
bbg	37.5082	44.5413	50.1252	42.6202	48.8614	40.757	49.4933	47.7104	33.6511	40.167	0.0993206	5.4857	0.750073	0.388831	0.934795
BBS1	0.414455	0.61863	0.313282	0.662489	0.397786	0.864542	0	0.346984	0	0.334725	0.126212	-0.0614709	0.0326029	0.913773	1
BBS4	5.18069	3.71178	1.56641	2.87079	2.51931	3.58168	1.45569	3.46984	3.45945	4.0167	-0.121722	1.74943	0.148575	0.70084	1
BBS8	1.86505	1.44347	1.25313	1.32498	1.45855	1.85259	4.36706	2.42889	1.88698	3.68197	-0.784199	0.889953	3.59847	0.0611438	0.554045
bbx	1.65782	2.26831	0.313282	0.44166	1.12706	1.23506	0	1.56143	1.88698	2.00835	-0.331987	0.714966	0.465749	0.496759	1
bc10	56.9876	48.6655	51.6916	46.1534	49.3255	52.3666	52.4047	50.1392	50.9483	49.874	-0.0148667	5.60007	0.0239191	0.877448	1
BCAS2	6.42406	9.89807	9.39847	6.84572	8.22092	7.78088	2.91137	5.37826	9.74937	6.6945	0.215488	3.09326	0.958583	0.330253	0.889978
bcd	2.07228	0.20621	0.313282	0.44166	1.25966	0.123506	0	0.173492	0.314496	0	2.48356	0.552632	4.73786	0.0335078	0.456407
bchs	175.936	207.86	187.029	195.655	197.302	193.41	164.492	215.998	196.56	213.889	-0.0395804	7.68494	0.153063	0.69658	1
BCL7-like	13.2626	11.3415	8.7719	10.379	12.5966	11.6096	21.8353	14.3999	11.6363	7.69867	-0.121474	3.44372	0.555798	0.725221	1
bcn92	19.4794	22.0645	29.1352	23.6288	20.4197	22.2311	20.3796	17.3492	26.4177	20.4182	0.0888057	4.39773	0.273784	0.602132	1
Bdbt	13.2626	12.785	15.6641	9.71651	15.2485	13.4622	16.0125	10.7565	14.1523	18.4099	-0.0801828	3.87451	0.263625	0.816594	1
bdg	30.2552	27.2197	29.1352	32.9036	30.2981	30.012	24.7466	31.0551	25.7887	30.46	0.0513395	5.03605	0.287864	0.726539	1
be	33.3636	33.406	26.3157	32.6828	35.2704	32.2351	36.3921	43.8935	30.5061	35.8156	-0.143635	4.95624	2.2169	0.146599	0.727525
BEAF-32	29.6336	27.0135	31.0149	31.3578	29.171	31.6175	21.8353	28.6262	30.1916	29.1211	0.0255124	4.84448	0.0528274	0.818753	1
beag	24.2456	22.6831	25.0626	26.4996	26.1876	26.4303	24.7466	18.0432	18.2408	27.4474	0.132626	4.588	0.688855	0.408821	0.954411
beat-Ia	35.4359	32.375	27.5688	31.137	30.961	32.1116	29.1137	34.0045	35.8525	33.8072	-0.0800274	4.98329	0.654107	0.42085	0.965314
beat-Ib	79.5754	78.7722	74.5612	85.4611	77.5683	84.4781	94.6195	73.7342	102.211	89.7063	-0.157045	5.98237	2.99008	0.087316	0.633344
beat-Ic	46.0045	62.6878	60.7767	46.5951	52.6404	57.3068	45.1262	58.8139	72.3341	60.9199	-0.159625	5.45845	1.53806	0.218234	0.804438
beat-IIa	108.38	120.633	115.601	103.128	108.463	110.167	136.834	125.782	128.629	116.484	-0.14233	6.81697	3.0716	0.0831869	0.628587
beat-IIb	31.4986	37.7364	41.3532	41.516	38.9168	41.1275	36.3921	35.2189	46.8599	42.1753	-0.0900203	5.39418	0.95753	0.330518	0.889978
beat-IIIa	0	0	0	0	0	0	0	0	0	0	0	-1.30545	0	1	1
beat-IIIb	74.1875	75.679	73.9346	75.7446	73.5242	83.1196	103.354	83.9702	80.1965	74.6436	-0.167426	6.035	3.10304	0.0816523	0.628587
beat-IIIc	44.1395	47.8407	52.0048	44.166	46.0769	47.9203	48.0376	49.0983	53.7788	43.5142	-0.0529397	5.17535	0.146316	0.703013	1
beat-IV	61.5466	58.1512	65.7893	58.2991	64.7729	70.3984	69.8729	63.3247	75.7935	70.2922	-0.178323	5.96346	4.85045	0.030278	0.437358
beat-Va	47.6624	31.5501	31.0149	31.137	47.8006	36.5578	58.2274	42.3321	88.3733	52.8865	-0.519153	5.36573	5.40903	0.0223543	0.376414
beat-Vb	31.2914	28.8694	27.8821	28.2662	30.4969	33.7172	46.5819	35.2189	35.2235	37.8239	-0.317357	5.03845	7.90757	0.0060806	0.190825
beat-Vc	19.4794	21.8582	23.8094	19.8747	20.0219	20.8725	33.4808	24.1154	23.5872	21.4224	-0.173208	4.52598	2.79047	0.103982	0.680216
beat-VI	67.5562	65.9872	64.2228	60.0657	63.3806	64.7172	98.9866	63.4981	75.479	73.6395	-0.18804	5.81618	3.79663	0.0545725	0.531026
beat-VII	149.618	157.751	145.363	139.785	149.833	156.359	152.847	164.991	174.545	178.074	-0.158967	6.98033	2.3848	0.126143	0.727525
beg	11.3975	8.86702	9.08518	10.1582	11.9999	10.6215	5.82274	6.7662	9.43488	10.7112	0.201427	3.45298	1.75046	0.189279	0.756418
bel	175.315	185.589	155.701	184.835	187.821	175.255	160.125	178.523	182.722	178.074	0.0198648	7.42624	0.0908491	0.763818	1
Bem46	19.8939	17.1154	17.8571	17.0039	18.8285	17.9084	26.2023	20.4721	16.0393	18.0751	-0.0602842	4.35199	0.185459	0.834439	1
ben	210.543	234.667	244.36	187.926	201.943	227.251	200.885	227.969	204.737	186.776	0.0380866	7.50506	0.161394	0.68886	1
Best1	76.8815	71.9672	77.0674	75.303	75.3805	76.2032	80.0627	87.4401	72.0196	73.6395	-0.0475774	6.24789	0.382046	0.538122	1
Best2	71.7008	79.8032	77.3807	75.303	71.0711	69.7809	74.2399	90.3894	78.624	75.9825	-0.0586089	6.0499	0.364833	0.547403	1
Best3	0.207228	0.20621	0.313282	0	0.0662977	0.370518	0	0.346984	0.314496	0.334725	-1.15542	-0.900544	1.90516	0.171593	0.730213
Best4	0	0	0	0	0.132595	0	0	0	0	0	1.64854	-1.08695	1.76269	0.189389	0.756418
Bet1	14.5059	8.86702	15.9774	11.9248	15.1159	15.3148	13.1012	13.5324	13.2088	15.3973	-0.101249	4.04185	0.524894	0.505422	1
Bet3	28.8046	29.9004	29.4485	26.2787	27.9776	32.1116	30.5694	26.0238	30.5061	22.7613	0.0092382	4.65212	0.00622986	0.93727	1
Bet5	18.8577	16.2906	15.6641	19.8747	14.4529	14.6972	20.3796	15.9613	13.8378	21.4224	0.0211973	4.09454	0.0301169	0.872605	1
beta3GalTII	8.08188	7.01114	8.45862	5.9624	7.16015	7.78088	7.27843	6.7662	8.17689	6.6945	-0.0116527	3.0068	0.00491633	0.944262	1
beta4GalNAcTA	28.5974	23.5079	34.7743	25.3954	27.4472	28.2829	45.1262	26.5443	26.4177	24.1002	-0.0299538	4.84703	0.050081	0.997742	1
beta4GalNAcTB	14.0915	9.07323	12.218	15.2373	14.6518	13.4622	11.6455	15.4408	11.0074	14.7279	-0.0431213	3.85381	0.103792	0.862371	1
beta4GalT7	5.38792	7.01114	6.89221	6.84572	6.82866	7.53387	7.27843	6.07223	4.71744	4.35142	0.143344	2.80728	0.4463	0.55366	1
betaCOP	93.4597	72.5859	88.0323	88.1111	102.761	98.1873	84.4297	79.8064	89.6313	83.0118	0.0306268	6.88592	0.0627977	0.802717	1
beta'COP	60.7177	52.7897	61.09	61.8323	72.9275	63.7291	48.0376	53.4356	42.4569	63.263	0.176404	6.02063	4.75956	0.0318271	0.447357
betaggt-I	24.8673	22.4769	31.0149	22.7455	25.7898	22.7251	17.4682	20.9926	27.0466	22.4266	0.161052	4.45584	1.48934	0.22561	0.814338
betaggt-II	32.1203	30.3129	30.0751	36.6577	34.0107	35.9403	34.9364	30.8816	32.3931	36.1503	-0.0538789	5.11844	0.205171	0.651704	1
betaNACtes1	0	0	0	0	0	0	0	0	0	0	0	-1.28433	0	1	1
betaNACtes2	0	0	0	0	0	0	0	0	0	0	0	-1.27608	0	1	1
betaNACtes3	0	0	0	0	0	0	0	0	0	0	0	-1.23441	0	1	1
betaNACtes4	0	0	0	0	0	0	0	0	0	0	0	-1.20276	0	1	1
betaNACtes6	0	0	0	0	0	0	0	0	0	0	0	-1.24289	0	1	1
beta-Spec	677.634	754.11	681.389	775.113	756.324	770.431	650.691	672.456	726.486	803.005	0.00700137	9.46634	0.00280102	0.957913	1
betaTry	0	0	0.939847	0	0.265191	0.247012	0	0	0	0	0.989288	3.85975	0.0528493	0.818876	1
betaTub56D	399.535	331.585	357.768	427.527	413.631	422.02	497.844	391.745	374.565	372.214	-0.0863018	8.82155	0.843691	0.360878	0.911293
betaTub60D	21.7589	14.2285	16.2907	17.6664	13.3921	13.7092	5.82274	10.4095	12.5798	12.3848	0.49014	3.9412	4.73677	0.0322285	0.447754
betaTub85D	2.48673	0.61863	0.939847	1.10415	1.39225	1.60558	1.45569	1.21445	1.25798	1.3389	-0.0491488	0.635646	0.0111719	0.916065	1
betaTub97EF	92.6308	78.7722	84.5862	104.232	95.6676	77.5618	106.265	78.245	87.4299	78.6603	0.12019	6.86197	1.80781	0.182259	0.746668
bft	0	0	0	0	0	0	0	0	0	0	0	-1.30545	0	1	1
BG642163	0	0	0	0	0	0	0	0	0	0	0	-1.2267	0	1	1
BG642167	0	0	0.313282	0.22083	0	0	0	0	0	0	1.92377	-1.27612	2.30647	0.160087	0.727525
BG642312	0.207228	0	0	0.22083	0	0.123506	0	0	0	0.66945	-0.917964	-1.02147	0.688988	0.409137	0.954622
Bgb	32.742	30.7253	30.7017	42.841	38.7179	40.1395	45.1262	34.0045	38.054	33.8072	-0.0889128	5.29782	0.701418	0.58157	1
bgcn	0.414455	0.20621	0	0.44166	0.331489	0.370518	0	0.346984	0.314496	0.66945	-0.348384	-0.497191	0.169387	0.681667	1
bgm	123.508	82.8964	110.275	63.599	137.966	34.0877	21.8353	29.3202	42.1425	34.4767	1.63601	6.37912	20.8134	1.64652e-05	0.0102005
B-H1	6.0096	5.98009	6.57893	8.39153	6.76237	9.75698	13.1012	9.71556	7.5479	6.35977	-0.399316	2.92583	3.99295	0.0488075	0.522845
B-H2	4.76624	5.98009	5.63908	3.75411	4.77343	5.80478	10.1898	6.5927	7.5479	4.0167	-0.357357	2.35437	1.83781	0.178709	0.741755
BHD	8.91079	7.62977	9.08518	9.49568	10.2098	9.88048	8.73411	7.28667	11.3219	8.36812	-0.000857794	3.3402	2.5614e-05	0.995973	1
bi	29.2191	38.5612	31.9548	32.9036	34.74	35.9403	42.2149	37.8213	41.828	40.167	-0.224487	5.11025	4.47331	0.0372822	0.481049
BI-1	153.556	138.161	155.701	142.877	148.043	151.048	176.138	168.461	151.273	154.978	-0.112856	7.31523	1.30809	0.255872	0.862722
bib	14.7132	11.1353	13.7844	13.4706	14.5855	16.1793	14.5569	14.7468	21.3857	17.4057	-0.32372	3.64004	4.50946	0.0365413	0.478268
bic	266.288	294.674	305.45	288.183	316.77	269.614	294.048	248.094	278.958	257.738	0.130446	8.25718	2.45205	0.120994	0.721252
BicC	0	0	0	0	0	0	0	0	0	0	0	-1.30545	0	1	1
BicD	141.329	152.389	148.809	142.435	145.523	147.219	107.721	141.223	160.707	145.271	0.0398185	7.00318	0.236606	0.627889	1
bif	321.203	324.987	305.763	335.661	342.295	366.072	298.415	333.279	342.172	340.75	-0.0482142	8.64232	0.284097	0.595384	1
BigH1	6.0096	0.41242	2.19298	1.32498	4.57454	0.61753	0	0.173492	0.314496	0	3.13991	2.04073	10.2512	0.00196733	0.108851
bigmax	17.1999	15.2595	17.5438	18.7705	21.0164	20.749	8.73411	12.6649	18.2408	14.7279	0.176364	4.43549	1.0585	0.306403	0.882172
Bili	88.0717	97.1249	85.526	87.6694	92.7505	90.7769	123.733	107.912	108.501	94.0577	-0.199547	6.60801	5.09892	0.0264377	0.408332
bin	0.414455	0.41242	0	0.22083	0.265191	0.247012	0	0.346984	0.314496	0.334725	-0.064703	-0.794691	0.00526493	0.942349	1
Bin1	8.91079	7.83598	12.5313	8.1707	9.08279	9.01594	20.3796	13.0119	14.7813	26.778	-0.785147	3.2448	14.3019	0.000284727	0.0382623
bin3	119.156	101.249	104.323	107.986	112.375	110.538	123.733	113.117	100.324	108.451	-0.0188886	6.65091	0.0567078	0.867173	1
bip1	9.11802	9.89807	10.3383	8.83319	10.1435	9.01594	5.82274	9.88906	10.6929	8.36812	0.0730569	3.41816	0.161706	0.688575	1
bip2	307.733	315.707	310.776	295.249	280.837	287.275	310.061	331.544	316.697	294.223	-0.028092	8.04774	0.0688744	0.793602	1
Bka	7.87465	7.42356	7.83205	10.1582	7.82313	8.1514	8.73411	6.5927	7.5479	9.70702	0.0379255	3.01989	0.0443017	0.833784	1
bl	134.698	135.892	141.604	142.877	129.678	134.622	122.278	125.088	132.403	136.233	0.0682032	7.15134	0.907646	0.369064	0.916651
blanks	0	0.20621	0	0	0.331489	0.123506	0	0	0	0	1.35316	-0.916321	1.50891	0.222945	0.81055
Blimp-1	95.3247	106.404	98.9972	85.682	103.424	87.1953	65.5058	106.871	100.324	87.6979	0.103275	6.64918	0.375348	0.541698	1
Blm	8.28911	8.2484	10.6516	6.18323	9.54687	10.004	13.1012	8.67461	7.23341	9.70702	-0.113075	3.42503	0.342602	0.583514	1
Blos1	14.7132	12.9912	17.2305	13.6914	12.1325	11.8566	2.91137	11.624	12.8943	11.3806	0.317655	3.93662	3.58032	0.0742482	0.605533
Blos2	6.21683	7.21735	5.95236	5.9624	9.01649	8.52192	4.36706	8.32763	7.8624	7.69867	-0.157192	3.20724	0.802607	0.521043	1
Blos3	5.80237	7.21735	3.75939	8.61236	7.22645	8.02789	13.1012	6.07223	9.43488	10.3765	-0.385181	3.03186	4.36962	0.0812116	0.628587
Blos4	9.94693	7.21735	7.83205	7.94987	7.88943	7.53387	14.5569	6.07223	8.17689	3.68197	0.207207	2.98113	1.15365	0.285751	0.882172
blot	72.5297	60.8319	59.5236	71.328	67.7563	76.0797	45.1262	79.9799	72.0196	74.6436	-0.108348	6.06118	1.4069	0.238794	0.835984
blow	18.6505	17.1154	19.1102	17.8872	19.6904	19.1434	20.3796	18.5637	24.8452	19.0793	-0.130587	4.45103	0.837747	0.397402	0.943688
blp	19.6866	20.8272	19.1102	24.7329	22.0771	17.6614	20.3796	16.4818	21.3857	18.4099	0.202713	4.31232	2.61734	0.109314	0.694651
blue	53.0503	47.2221	42.2931	58.5199	60.8613	59.4064	52.4047	54.8235	52.8353	62.9283	-0.10974	5.86849	1.31993	0.371886	0.918975
blw	1957.27	1455.02	1520.99	2156.4	2043.16	1639.42	2803.65	2068.89	1898.61	2324.66	-0.231059	11.0881	4.92724	0.0290316	0.427099
BM-40-SPARC	213.237	174.454	202.38	213.763	236.152	197.486	190.695	129.946	153.788	195.814	0.26927	7.43917	2.50562	0.117062	0.711026
Bmcp	28.5974	26.8073	26.629	28.2662	27.5798	26.5538	32.0251	31.2286	27.3611	19.7488	0.0307999	4.73414	0.0688417	0.79365	1
bmm	87.8645	47.6345	55.4509	55.2075	69.6126	42.8566	52.4047	62.9777	59.4397	61.9241	0.178576	6.41391	0.838105	0.362465	0.911293
bnb	380.884	418.812	417.292	438.789	441.742	403.741	369.744	382.03	463.567	420.749	0.0380148	8.4295	0.111001	0.739808	1
bnk	0	0	0.626564	0	0	0	0	0	0	0	1.94707	-1.26169	2.16251	0.160087	0.727525
bnl	13.8843	12.3726	13.7844	29.812	19.0274	16.1793	26.2023	12.4914	21.7002	22.7613	-0.075282	3.43006	0.162851	0.687533	1
BobA	0	0	0	0	0	0	0	0	0	0	0	-1.20567	0	1	1
boca	20.5155	16.4968	20.6766	20.3163	18.2319	18.7729	21.8353	12.3179	14.4668	13.7237	0.299987	4.29884	3.32995	0.0714544	0.594126
bocksbeutel	24.6601	25.1576	25.6891	32.6828	29.3699	24.4542	27.658	25.6768	26.7322	29.4558	0.0539786	4.56679	0.210208	0.647746	1
boi	10.9831	6.39251	5.63908	5.52075	7.29275	7.28686	7.27843	7.46016	9.43488	7.69867	-0.117496	2.98297	0.28861	0.592481	1
bol	322.239	377.777	369.986	304.524	316.306	356.068	324.618	361.037	393.12	346.106	-0.0785823	8.06304	0.351198	0.55497	1
boly	0	0	0	0	0	0	0	0	0	0	0	-1.30545	0	1	1
bon	118.12	110.322	111.215	109.973	119.535	114.861	96.0752	127.343	119.194	117.488	-0.0282654	6.74921	0.14399	0.705269	1
bond	55.9515	79.8032	62.0299	65.8073	68.817	60.6415	55.316	74.7751	67.6166	73.3047	-0.0129257	6.07824	0.00899586	0.924654	1
bonsai	23.0023	22.0645	26.629	24.5121	23.2705	19.3904	20.3796	18.2167	24.2162	20.0835	0.227789	4.41122	2.46322	0.120163	0.719386
bor	56.1587	57.7388	65.1627	72.2113	62.5187	65.3347	81.5184	52.9151	60.0687	67.9491	-0.0322429	5.64378	0.095983	0.826257	1
bora	2.69396	0.20621	0	0.883319	1.19336	0.247012	0	0	0.314496	0	2.6889	0.472976	6.01582	0.0167813	0.333572
borr	4.55901	0.61863	0.313282	0.44166	1.52485	0.370518	0	0.173492	0	0	2.90867	0.964198	8.29428	0.00505597	0.173302
boss	244.736	227.656	211.779	249.096	241.257	223.546	307.15	243.236	268.894	262.759	-0.142476	8.30133	2.94056	0.089934	0.64123
botv	27.7685	26.3949	29.4485	29.1495	26.1876	22.3546	17.4682	21.6865	22.6437	26.4433	0.293538	4.61883	8.89458	0.0037082	0.149824
bou	7.46019	9.07323	13.1579	11.4831	9.48057	7.90439	8.73411	10.583	8.80589	9.70702	0.124218	3.57403	0.554568	0.45846	1
bowl	24.0384	25.3638	25.6891	25.1746	25.7898	21.9841	17.4682	34.3515	21.7002	19.414	0.0789728	4.43265	0.32732	0.718053	1
BoYb	1.45059	0	0	0.44166	0.596679	0.123506	0	0	0	0.334725	2.192	0.233314	3.76425	0.0561098	0.536008
br	39.7877	50.9338	52.6314	44.166	45.215	54.5897	37.8478	49.0983	47.1744	54.2254	-0.0969315	5.52028	0.687882	0.409151	0.954622
Br140	31.2914	29.6942	28.5087	27.3829	30.7621	30.1355	23.291	27.0648	23.2727	29.1211	0.127482	4.95266	0.934599	0.336345	0.893707
brat	106.929	131.768	115.914	97.6068	111.712	113.379	122.278	142.09	132.403	97.7397	-0.109442	6.66327	0.549782	0.4604	1
Brca2	15.3348	20.4148	17.2305	20.5372	19.2263	16.9203	13.1012	17.3492	10.0639	13.0543	0.355412	4.1639	6.83484	0.0105313	0.260511
Brd	0	0	0	0	0	0	0	0	0	0	0	-1.18369	0	1	1
Brd8	9.11802	8.45461	14.411	13.2498	13.8562	13.7092	13.1012	8.67461	9.74937	12.7195	0.0536811	3.54538	0.0609824	0.80553	1
Bre1	47.0407	43.5103	51.3783	48.8034	49.8559	54.5897	42.2149	35.3924	43.0859	55.2296	0.05071	5.48894	0.0715581	0.789713	1
Brf	27.5613	27.4259	29.7618	33.787	32.0881	33.4701	27.658	26.8913	31.7641	23.7655	0.0583606	5.07354	0.343068	0.559577	1
brk	8.28911	12.3726	14.0977	8.83319	9.67946	8.52192	5.82274	10.4095	7.23341	9.70702	0.263009	3.35116	2.11573	0.149384	0.727525
brm	97.397	99.187	97.1175	97.1651	97.5239	96.5817	82.974	78.4185	94.6633	102.426	0.0949935	6.56348	0.669844	0.415337	0.960773
Brms1	21.1372	26.8073	20.9899	28.0454	25.9224	28.2829	33.4808	21.6865	25.1597	26.4433	-0.0869641	4.81379	0.407352	0.611863	1
brn	5.18069	4.33041	4.69923	3.09162	4.11046	3.95219	1.45569	4.16381	5.34643	5.02087	-0.0170257	2.31071	0.00515514	0.942926	1
Bro	0	0	0	0	0.0662977	0	0	0	0	0	1.07462	-1.25585	1.1364	0.32055	0.882172
brp	691.311	764.008	774.747	751.484	791.926	854.415	716.197	716.523	910.466	895.724	-0.11903	9.50698	1.04746	0.308925	0.882172
bru	57.1948	54.027	49.8119	64.4823	58.4083	60.1474	66.9615	57.5994	53.1498	57.5727	-0.0389905	5.90755	0.234186	0.763677	1
bru-2	37.0937	40.8296	35.7142	40.6327	41.2372	33.8407	52.4047	53.4356	43.7149	44.8531	-0.194762	5.24611	2.29138	0.133711	0.727525
bru-3	326.591	426.03	376.565	336.545	345.08	367.678	350.82	373.876	473.002	404.348	-0.124411	8.05128	0.833604	0.363751	0.911666
Bruce	331.564	397.573	353.696	358.407	371.201	354.586	356.643	362.946	342.486	368.197	0.0222769	8.57699	0.0604686	0.806335	1
brv1	0	0	0	0	0	0	0	0	0	0	0	-1.30545	0	1	1
brv2	0.207228	0.20621	0	0	0	0	0	0	0	0	1.88706	-1.04019	2.18674	0.160087	0.727525
brv3	0	0	0	0.22083	0.132595	0.123506	0	0	0.943488	0.66945	-1.6543	-0.747445	2.12193	0.148796	0.727525
BRWD3	79.161	85.1647	87.4057	93.1902	89.2367	84.1076	74.2399	80.3269	72.963	85.0201	0.122371	6.40579	1.1792	0.280513	0.882172
bs	20.3083	13.1974	13.7844	15.2373	15.7789	14.5737	13.1012	17.6962	21.7002	17.071	-0.127138	4.17514	0.918249	0.353372	0.907858
bsf	115.84	114.446	115.601	140.889	120.264	114.12	131.012	106.177	120.452	116.819	0.0557758	6.82779	0.398439	0.529548	1
Bsg	540.035	636.776	617.792	529.55	548.547	513.044	540.059	562.288	606.663	561.668	0.0447559	8.82922	0.247409	0.620158	1
Bsg25A	0	0	0	0	0	0	0	0	0	0	0	-1.2771	0	1	1
Bsg25D	70.2502	78.7722	72.9948	63.8198	73.9219	77.4383	61.1388	68.1824	81.1399	68.6186	-0.00320862	6.12482	0.000753481	0.978164	1
bsh	3.52287	6.1863	4.38595	2.42913	4.11046	5.68128	2.91137	5.55175	4.71744	5.69032	-0.345514	2.32454	2.48426	0.118613	0.713425
bsk	178.837	194.662	202.38	174.897	174.297	187.729	221.264	198.996	218.26	191.797	-0.133535	7.49941	2.3453	0.129282	0.727525
bt	1335.37	1255.41	1078	1161.12	1143.83	1165.28	1183.47	1573.92	1032.49	1308.1	-0.0689702	10.0845	0.17441	0.677249	1
BTBD9	42.6889	37.9426	41.3532	39.7494	43.8228	45.8207	52.4047	47.0164	49.0614	54.5602	-0.26152	5.62515	6.92722	0.0100395	0.252928
BtbVII	143.194	141.254	136.591	142.656	156.794	155.865	149.936	142.611	155.046	153.639	-0.0704602	7.34398	0.984694	0.377675	0.923727
btd	2.07228	1.64968	1.25313	0.883319	1.59114	1.35857	0	2.2554	1.57248	1.3389	-0.026122	0.789783	0.00461528	0.945992	1
Btd	0.207228	0.20621	0.626564	0.662489	0.198893	0	0	0.346984	0	0	1.59425	-0.630858	2.5087	0.116841	0.710914
Bteb2	0	0	0	0	0	0	0	0	0	0	0	-1.29099	0	1	1
BthD	1.65782	0.20621	0.313282	0.662489	0.994466	0	0	0	0.314496	0	3.47244	0.369734	7.90424	0.00614947	0.191907
Btk29A	42.8961	43.7165	42.9197	40.191	40.9057	39.1514	36.3921	44.067	35.538	40.167	0.0941701	5.25116	0.812601	0.369836	0.917163
btl	11.6047	12.3726	10.3383	15.0164	12.7292	12.4741	17.4682	17.6962	15.7248	9.03757	-0.184591	3.50501	1.33501	0.251072	0.855304
btn	0	0	0	0	0	0	0	0	0	0	0	-1.26416	0	1	1
btsz	262.972	299.211	246.866	276.479	276.13	288.14	260.568	299.448	270.466	254.056	-0.014299	7.99335	0.0315058	0.859528	1
btv	4.97346	2.68073	5.95236	4.4166	2.9171	5.18725	0	3.64334	2.20147	6.6945	-0.0372874	2.29957	0.0120548	0.912825	1
btz	48.0768	45.5724	39.1603	48.8034	47.5355	42.9801	53.8603	35.9129	50.9483	42.5101	0.0564374	5.59632	0.216461	0.64291	1
Bub1	25.2818	25.3638	24.7493	27.6037	26.2539	22.9721	21.8353	21.86	30.8206	26.4433	0.0542896	4.68366	0.189627	0.664303	1
Bub3	16.371	14.4347	14.0977	16.7831	15.8452	12.4741	16.0125	12.4914	12.8943	11.3806	0.299034	4.11139	3.81285	0.0540693	0.528589
BubR1	7.25297	5.56767	3.4461	6.84572	9.81206	10.1275	2.91137	5.55175	9.43488	8.36812	-0.201716	3.15569	0.616941	0.434316	0.977705
Buffy	19.2722	17.3216	17.8571	16.5622	18.4971	16.7968	20.3796	19.9516	18.5553	14.7279	0.00752454	4.19936	0.00307057	0.955936	1
bun	596.608	719.672	733.394	613.024	655.353	667.056	682.716	677.487	722.397	723.34	-0.0661494	9.21542	0.844225	0.360727	0.911293
bur	88.4862	100.012	101.503	84.1362	99.9106	95.4702	64.0501	80.5004	76.108	85.3548	0.214796	6.51203	7.79737	0.00642976	0.196619
Burs	0	0	0.313282	0	0	0	0	0	0	0	1.23688	-1.24941	1.07124	0.32055	0.882172
bves	105.064	114.859	104.323	101.803	105.148	117.207	133.923	108.606	118.879	116.484	-0.152254	6.65787	2.81003	0.0972598	0.663755
bw	31.2914	43.0979	30.0751	44.3868	38.6516	36.6813	37.8478	31.5756	33.9656	39.1628	0.0817837	5.4188	0.411909	0.522686	1
bwa	63.4117	51.5525	56.3908	56.9741	65.1043	54.3427	48.0376	57.9464	52.5208	62.2588	0.0807859	6.02223	0.570079	0.452262	0.997494
Bx	95.3247	106.611	93.6714	89.4361	98.3195	102.387	78.607	92.4713	90.8893	88.7021	0.0782866	6.40274	0.921453	0.40129	0.948075
Bx42	35.4359	30.3129	33.5212	39.9702	36.5963	38.1634	32.0251	30.1876	40.57	41.8406	-0.0661577	5.24679	0.21967	0.640461	1
bxd	0	0	0	0	0	0	0	0	0	0	0	-1.29076	0	1	1
by	123.922	123.107	125.313	113.286	136.905	133.016	120.822	127.343	102.526	112.133	0.0623856	7.03783	0.833714	0.363719	0.911666
byn	0	0	0	0	0	0.123506	0	0	0	0	-1.48981	-1.21322	2.2768	0.169634	0.727525
bys	16.7854	16.4968	15.0375	15.2373	18.2982	15.0677	16.0125	11.4505	14.7813	13.0543	0.255749	3.85998	2.42767	0.122833	0.724493
Bzd	23.4167	16.4968	17.8571	22.083	20.8838	20.8725	21.8353	16.3083	14.1523	19.0793	0.158191	4.29684	1.53174	0.219175	0.805567
c11.1	87.4501	93.2069	91.4784	103.128	94.1427	96.5817	80.0627	106.871	90.2603	83.0118	0.0234591	6.56386	0.082106	0.775143	1
c12.1	24.8673	20.8272	21.3032	16.5622	23.6683	25.3187	24.7466	18.2167	13.5233	20.7529	0.0926404	4.51561	0.581143	0.447923	0.992577
c12.2	36.8865	36.7054	36.9673	37.0994	43.9554	38.4104	45.1262	39.0357	22.0147	37.4892	0.10824	5.24462	0.670669	0.415052	0.960416
C15	1.03614	2.26831	2.19298	2.87079	2.71821	1.23506	0	1.21445	1.88698	1.67362	0.714739	1.10264	3.82211	0.0537846	0.527743
C1GalTA	60.7177	58.3574	62.6564	54.3241	58.4083	66.8168	77.1513	60.5488	65.7296	58.9116	-0.14149	5.83065	3.9611	0.0496963	0.522845
c(2)M	0.414455	0.20621	0	0.44166	0.464084	0.123506	0	0.520477	0.943488	0.334725	-0.244075	-0.302006	0.0724038	0.788568	1
c(3)G	10.3614	13.1974	13.7844	9.93734	11.801	11.7331	10.1898	15.4408	14.4668	11.3806	-0.140933	3.28219	0.480073	0.490231	1
C3G	164.124	183.733	170.426	179.093	180.86	179.207	177.594	180.258	174.86	175.061	-0.0140558	7.45446	0.0358223	0.850323	1
C901	0.621683	0.82484	0.313282	1.10415	1.19336	1.60558	0	0.693969	1.25798	1.3389	-0.391602	0.409203	0.693775	0.40716	0.95344
ca	106.308	100.424	104.636	113.065	113.435	121.777	123.733	128.384	111.646	117.488	-0.162965	6.92349	3.58075	0.061772	0.556114
Ca-alpha1D	530.088	623.372	562.968	579.237	581.563	619.63	621.578	654.066	582.446	596.814	-0.0956008	9.11176	0.820417	0.367555	0.915439
Ca-alpha1T	747.056	850.203	757.83	751.705	843.97	846.881	858.854	829.119	910.151	935.221	-0.148738	9.78961	1.64126	0.203551	0.782171
Ca-beta	275.613	304.572	279.134	262.787	279.379	304.442	307.15	336.748	331.164	337.403	-0.207824	8.16195	4.27294	0.0416896	0.502046
CaBP1	45.5901	42.4792	42.9197	44.3868	44.2206	49.8964	42.2149	40.0767	45.9164	46.8615	-0.0433228	5.5527	0.0948772	0.758801	1
cac	454.036	583.78	527.88	508.35	524.481	561.211	492.022	534.876	592.825	598.488	-0.0994957	8.93491	0.910412	0.342644	0.898448
cact	152.934	140.017	141.604	142.435	149.833	145.367	126.645	135.497	140.894	142.593	0.0669418	7.15203	0.51529	0.474777	1
cactin	14.2987	14.4347	16.604	18.108	16.6407	19.514	14.5569	11.277	20.7567	13.7237	-0.0117439	3.95013	0.00231264	0.961755	1
cad	3.93733	1.44347	1.25313	1.10415	2.58561	1.9761	1.45569	0.867461	1.88698	1.67362	0.432495	1.36677	0.55369	0.458911	1
Cad74A	6.83851	8.45461	6.26564	7.06655	7.02756	6.42231	7.27843	6.93969	6.91891	13.0543	-0.163467	3.10794	0.911548	0.525713	1
Cad86C	13.677	11.1353	10.3383	14.5748	12.6629	16.1793	17.4682	15.4408	11.3219	20.7529	-0.354706	3.96245	4.50014	0.0367309	0.479623
Cad87A	92.2163	91.351	80.5135	100.478	93.2809	91.271	80.0627	98.1966	90.5748	103.43	-0.0290975	6.466	0.128433	0.720929	1
Cad88C	2.2795	2.0621	2.19298	1.54581	1.79004	1.60558	2.91137	1.21445	1.88698	1.67362	0.235068	0.938797	0.421434	0.517929	1
Cad89D	1.65782	4.1242	2.19298	4.85826	3.11599	2.71713	4.36706	2.42889	3.77395	1.3389	0.248624	1.75696	0.538463	0.465039	1
Cad96Ca	23.8312	19.7961	27.5688	23.8496	23.9335	26.5538	16.0125	30.5346	25.4742	24.7696	-0.123713	4.81902	1.31247	0.255083	0.861593
Cad96Cb	0.621683	1.44347	2.19298	0.883319	0.464084	2.34661	1.45569	1.38794	1.25798	2.00835	-0.810128	1.059	3.93328	0.050487	0.522845
Cad99C	35.8504	35.8805	30.7017	37.0994	39.7786	40.6335	39.3035	48.2308	40.2555	45.1879	-0.25696	5.27878	4.80758	0.0309984	0.445579
CadN	289.704	350.969	318.921	309.383	317.632	324.203	288.226	338.83	360.098	347.779	-0.0690475	8.29205	0.412211	0.522534	1
CadN2	75.2236	84.9585	71.1151	76.8488	76.2424	88.1833	98.9866	79.8064	78.624	79.9992	-0.129851	6.29508	1.96291	0.164752	0.727525
Caf1	27.9757	24.539	26.3157	22.083	25.9887	28.6534	10.1898	22.901	24.2162	25.1044	0.0915568	4.79206	0.396967	0.828245	1
Caf1-105	8.08188	5.15525	6.89221	5.52075	5.96679	7.28686	0	3.29635	4.71744	5.3556	0.357823	2.72014	1.09671	0.297883	0.882172
Caf1-180	7.25297	3.29936	2.19298	2.64996	5.8342	3.70518	0	2.2554	3.45945	4.68615	0.455135	2.46432	0.91577	0.341235	0.898448
cag	12.6409	9.69186	11.2782	10.8207	14.3866	13.4622	17.4682	10.93	10.0639	11.7154	-0.0272723	3.58228	0.036321	0.849297	1
CAH1	200.804	209.922	189.536	230.546	223.622	194.028	251.834	226.581	197.503	206.86	-0.0199207	7.83682	0.0856544	0.770472	1
CAH2	159.98	130.118	134.085	165.181	145.59	154.383	179.049	152.847	162.594	142.593	-0.0972041	7.41991	0.928838	0.337831	0.895183
CAHbeta	16.5782	16.4968	12.8446	12.8081	17.37	13.0916	17.4682	10.4095	8.17689	15.0626	0.335646	3.83648	2.72765	0.102222	0.676104
cal1	29.8408	27.4259	29.4485	28.487	31.1599	32.9761	23.291	24.8094	31.1351	28.1169	0.0330386	4.86139	0.0459943	0.830687	1
CalpA	126.616	150.946	138.784	132.498	130.408	139.809	116.455	155.449	128	125.187	0.0179843	7.00248	0.070174	0.791709	1
CalpB	72.9441	86.1957	72.0549	88.7736	76.5076	70.6455	71.3286	87.6136	73.2775	74.3089	0.0650654	6.29702	0.903793	0.344395	0.899327
CalpC	7.87465	7.62977	7.20549	7.50821	8.02202	6.91634	10.1898	8.67461	5.66093	6.6945	0.0730635	3.2913	0.185916	0.667402	1
Cals	747.056	841.13	823.932	678.831	697.452	692.869	866.133	905.976	829.011	749.449	-0.0930532	9.10136	0.244464	0.622244	1
Calx	428.34	433.041	408.52	405.223	427.62	470.558	443.984	536.958	481.808	418.741	-0.163455	8.95314	3.17703	0.0781621	0.620581
calypso	12.8481	10.3105	14.0977	13.4706	11.801	13.5857	14.5569	9.54207	13.2088	10.7112	0.0478024	3.74234	0.0992051	0.860325	1
Cam	2920.67	3420.2	3447.98	3032.66	3010.38	2966.49	3249.09	2894.2	3928.37	3456.03	-0.0591103	11.4915	0.296841	0.587261	1
CaMKI	638.261	747.923	722.429	603.528	661.054	619.506	653.603	733.352	580.559	555.978	0.102171	9.11899	0.745816	0.390174	0.936522
CaMKII	976.664	1202	1106.83	783.283	981.007	1064.75	1304.29	1373.71	1137.53	999.823	-0.218667	9.60651	1.62397	0.205926	0.786864
Camta	227.95	272.403	212.405	228.78	223.954	221.57	219.808	240.46	263.233	246.692	-0.0349708	7.66584	0.116793	0.733361	1
can	0.207228	0.20621	0	0	0.464084	0.247012	0	0.346984	0	0	0.339379	-0.23872	0.165025	0.685567	1
cana	32.1203	27.8383	28.5087	27.3829	25.2594	22.3546	14.5569	23.4214	25.4742	24.7696	0.291866	4.62962	3.05263	0.084128	0.628587
CanA1	18.0288	18.1465	15.9774	13.6914	18.5634	22.7251	16.0125	24.9829	10.0639	20.7529	-0.207461	4.25443	2.02281	0.15852	0.727525
CanA-14F	185.054	224.356	193.295	169.597	198.959	207.367	139.746	211.313	209.769	200.5	-0.0127542	7.30728	0.0134741	0.907858	1
CanB	162.052	171.36	171.679	156.127	159.976	157.717	183.416	151.459	184.609	168.032	-0.0348889	7.33649	0.183626	0.669332	1
CanB2	111.696	100.63	105.576	99.1526	98.4521	104.363	88.7968	109.647	103.469	97.4049	0.0198869	6.6123	0.0668737	0.796554	1
Cand1	55.9515	48.2531	52.0048	54.7658	54.563	56.9363	62.5945	57.2524	54.4078	55.8991	-0.100394	5.87151	1.75021	0.18931	0.756418
Cap	47.8696	45.3662	52.0048	51.0117	51.3807	49.5259	33.4808	42.8526	57.2383	53.2213	0.0324974	5.59466	0.0354865	0.851018	1
CAP	511.438	494.079	467.73	532.2	511.553	541.451	516.768	562.982	529.297	528.865	-0.0909869	8.98902	1.34955	0.248528	0.850302
Ca-P60A	3321.24	2183.56	2027.88	2947.64	2972.72	2751.59	4282.63	4412.43	3067.28	4022.05	-0.461676	11.7682	6.31431	0.0138165	0.298742
Capa	98.4331	79.8032	96.4909	84.1362	61.1265	110.414	69.8729	69.0499	102.211	68.9533	-0.0304232	6.06979	0.0412056	0.839615	1
CapaR	2.07228	1.03105	0.313282	1.32498	1.25966	1.48207	2.91137	2.08191	1.57248	0.66945	-0.358232	0.856006	0.73661	0.393103	0.940793
Cap-D2	5.80237	4.74283	4.07267	2.64996	4.04416	4.44622	4.36706	2.08191	1.57248	2.00835	0.590536	2.23112	2.07884	0.152937	0.727525
Cap-D3	9.94693	10.3105	12.8446	11.9248	10.9391	12.2271	16.0125	13.0119	11.6363	12.3848	-0.183937	3.95814	2.47446	0.123724	0.726405
Cap-G	25.2818	16.4968	17.2305	16.5622	19.4252	22.8486	13.1012	20.9926	19.4987	19.0793	-0.0710091	4.49372	0.202106	0.654142	1
Cap-H2	48.0768	58.7698	52.9447	56.3116	53.5685	55.9482	49.4933	60.8958	57.8672	56.5685	-0.0740685	5.74744	0.780884	0.379301	0.926486
Capr	113.975	114.446	109.962	119.469	124.706	120.789	113.543	99.5845	117.936	101.756	0.0766283	6.74775	0.31762	0.574488	1
caps	90.9729	114.859	102.443	98.7109	105.347	98.0638	104.809	115.372	101.897	98.7438	-0.0176188	6.57661	0.0359127	0.850137	1
Caps	776.689	893.92	859.333	849.311	780.854	816.869	818.095	878.217	774.289	864.26	0.00246437	9.5513	0.000455136	0.983028	1
capt	150.24	146.615	137.218	150.164	164.352	190.199	174.682	179.044	151.902	167.697	-0.205338	7.39815	8.82939	0.00383019	0.152325
capu	123.922	93.8255	89.912	102.465	99.3803	112.638	104.809	110.688	98.1227	112.468	-0.0831406	6.91229	0.618786	0.433632	0.977542
car	28.183	28.2508	26.9423	31.5787	32.8174	35.8168	29.1137	28.2792	30.5061	32.4683	-0.0869655	4.97047	0.685066	0.410108	0.955813
cas	0	0	0	0	0.198893	0.123506	0	0	0	0	0.565166	-0.292473	0.218607	0.641388	1
Cas	34.3998	27.4259	23.8094	26.2787	26.9832	22.8486	17.4682	24.1154	21.3857	20.0835	0.353037	4.78944	2.68947	0.104617	0.680906
CASK	315.193	332.617	306.077	338.311	352.24	373.976	311.517	363.293	342.486	392.632	-0.121353	8.45988	1.73997	0.190597	0.759438
casp	56.7804	56.5015	66.4158	64.4823	64.4414	57.9243	66.9615	52.9151	70.4471	63.5977	-0.000289596	6.01221	1.37689e-05	0.997048	1
Cat	213.859	176.309	162.907	202.501	202.208	176.614	192.15	245.318	165.739	226.274	-0.0723335	7.71688	0.343348	0.559417	1
cathD	332.6	287.457	293.859	310.045	329.102	317.04	318.795	311.765	263.548	302.591	0.0390356	8.41005	0.149131	0.700308	1
cato	0	0	0	0	0	0	0	0	0	0	0	-1.30545	0	1	1
Catsup	41.2383	38.9737	41.3532	40.6327	45.1487	39.2749	36.3921	38.1683	32.3931	33.4725	0.203797	5.30721	3.51727	0.0640798	0.563724
caup	10.1542	9.48565	14.7243	9.71651	10.3424	12.5976	14.5569	11.624	13.2088	13.7237	-0.259499	3.59455	2.15952	0.145289	0.727525
cav	5.59515	4.33041	5.3258	5.29992	5.23752	7.28686	1.45569	5.55175	6.60441	5.69032	-0.207777	2.49615	0.612402	0.436005	0.979592
caz	98.4331	108.466	92.7315	93.8527	93.6787	96.2112	91.7082	91.2569	99.6952	74.9784	0.101114	6.24674	1.45828	0.230471	0.822506
cbc	11.812	16.4968	10.6516	17.2247	15.9777	14.6972	23.291	11.971	17.6118	15.0626	-0.08414	3.99805	0.38118	0.738187	1
Cbl	100.298	105.992	104.636	87.8903	94.6068	105.104	101.898	103.748	115.106	96.4008	-0.0854152	6.61251	1.30736	0.256003	0.862912
CBP	8.08188	2.0621	3.4461	3.53328	4.90603	2.71713	0	3.81683	1.57248	3.01252	0.725809	2.72876	3.6025	0.061002	0.554045
Cbp20	15.3348	11.5478	9.71175	14.7956	14.9833	14.2032	14.5569	11.971	10.6929	16.4015	0.00454275	3.99989	0.00110392	0.973571	1
Cbp53E	433.727	461.704	480.262	462.859	447.244	453.391	518.224	481.614	539.675	565.35	-0.161623	8.77543	2.72611	0.102318	0.676202
Cbp80	37.5082	40.8296	40.4134	36.4369	44.3532	37.1753	21.8353	32.2695	36.4815	34.8114	0.245768	5.32311	8.20661	0.00522907	0.175284
cbs	45.7973	47.4283	42.2931	44.166	39.9775	46.0678	39.3035	34.5249	48.7469	49.874	-0.00297531	5.50802	0.000442392	0.983267	1
Cbs	68.7996	68.0493	69.8619	67.1323	73.4579	75.9562	52.4047	73.0402	66.0441	70.2922	0.0126918	5.67539	0.00843221	0.927046	1
cbt	84.3416	103.311	115.914	96.2818	98.2532	93.2471	58.2274	92.1244	102.211	91.3799	0.152222	6.62421	2.40231	0.124779	0.727525
cbx	32.1203	24.7452	30.3884	27.1621	29.0384	25.9363	23.291	22.554	24.8452	28.1169	0.192892	4.76672	3.64321	0.0595886	0.549271
Cby	0.207228	0.20621	0.626564	0.22083	0.132595	0.494024	0	0.693969	0	0.334725	-0.718875	-0.394328	0.830523	0.364635	0.91265
CCAP	2.48673	2.0621	1.56641	1.98747	1.25966	1.48207	0	1.90841	3.77395	1.3389	-0.0670644	1.23557	0.035756	0.85046	1
CCAP-R	2.90119	3.91799	6.89221	3.97494	3.38118	5.06375	1.45569	5.55175	6.60441	4.68615	-0.33094	2.01276	1.49686	0.224451	0.813029
CCDC151	0.621683	0	0	0	0.265191	0.370518	0	0.173492	0	0.334725	-0.156363	-0.797355	0.0301816	0.862501	1
Ccdc56	0	0	0	0	0	0	0	0	0	0	0	-1.30545	0	1	1
CCHa1	3.7301	6.1863	6.89221	7.50821	4.57454	5.18725	0	4.16381	6.60441	5.02087	0.235515	2.399	0.834734	0.527694	1
CCHa1-R	7.46019	6.59872	8.14534	7.72904	9.54687	12.7211	11.6455	12.1445	9.43488	11.7154	-0.537103	3.47898	8.63459	0.00422021	0.158058
CCHa2	23.2095	62.894	49.4986	33.1245	60.2646	17.4144	14.5569	21.166	23.9017	20.4182	1.20248	5.21891	15.0628	0.000201621	0.0340657
CCHa2-R	5.38792	5.56767	5.95236	8.39153	8.7513	8.1514	20.3796	8.15413	6.60441	7.69867	-0.330761	2.9004	2.72833	0.306576	0.882172
Cchl	121.021	100.63	121.553	133.16	123.579	120.665	142.657	105.83	130.83	121.505	-0.0366376	7.05747	0.123671	0.725936	1
CCKLR-17D1	11.6047	12.5788	10.6516	13.4706	10.7402	13.9562	11.6455	12.1445	11.6363	11.0459	-0.0578589	3.59733	0.138137	0.711042	1
CCKLR-17D3	14.2987	11.1353	15.0375	13.029	13.1269	14.4502	7.27843	13.7059	15.4103	16.4015	-0.10087	3.97766	0.440183	0.508785	1
Ccm3	80.1971	85.7833	94.9245	71.1072	76.4413	83.8606	91.7082	83.6232	82.3979	79.9992	-0.0400978	5.98781	0.125736	0.723751	1
Ccn	55.1226	61.863	64.5361	62.4948	59.9331	65.7052	61.1388	62.1102	63.8427	63.9324	-0.0654831	5.85112	0.544784	0.462439	1
Ccp84Aa	2.48673	0	0	0.662489	0.994466	0.61753	1.45569	0.867461	0	2.6778	-0.167382	0.501346	0.0358686	0.850227	1
Ccp84Ab	8.91079	0	0	0.662489	2.18782	0.864542	1.45569	4.85778	4.08845	4.0167	-0.384734	1.31987	0.335705	0.563813	1
Ccp84Ac	0	0	0	0	0	0	0	0.173492	0	0	-1.53679	-1.24106	2.28139	0.169634	0.727525
Ccp84Ad	0.621683	0	0	0	0	0	0	0.346984	0	0.334725	-0.425489	-1.04854	0.118345	0.732056	1
Ccp84Ae	0	0.20621	0	0	0	0	0	0	0	0	1.20824	-1.17294	1.05198	0.32055	0.882172
Ccp84Af	0	0	0	0	0	0	0	0	0	0	0	-1.29805	0	1	1
Ccp84Ag	1.45059	0.20621	0.939847	2.42913	2.45302	0.988048	4.36706	2.77588	1.88698	4.35142	-0.581023	1.99316	2.59333	0.309608	0.882172
Ccs	13.2626	14.0223	12.218	12.1456	11.0717	12.5976	5.82274	12.3179	13.5233	13.0543	0.027751	3.73568	0.033841	0.854473	1
Cct1	138.843	129.912	136.278	146.41	151.623	145.737	131.012	138.967	179.577	141.923	-0.0741036	7.25654	1.01599	0.316261	0.882172
Cct2	90.7657	73.4107	87.4057	103.569	87.8445	75.7092	90.2525	64.8861	78.9385	83.6812	0.190753	6.12131	2.92953	0.0905283	0.643718
Cct5	43.5178	37.7364	31.9548	42.1785	42.3642	43.2271	26.2023	35.2189	30.8206	34.8114	0.17441	5.46661	1.25026	0.266575	0.880418
Cctgamma	42.2744	30.9315	33.8345	35.9953	39.8449	38.7809	42.2149	30.8816	33.0221	34.1419	0.061845	5.33523	0.14882	0.700606	1
c-cup	0	0	0.313282	0	0	0	0	0	0	0	1.233	-0.936187	1.41427	0.32055	0.882172
Ccz1	16.9927	21.0334	21.6165	16.1206	17.1711	19.1434	24.7466	20.9926	17.9263	18.7446	-0.0995743	4.2839	0.664724	0.417119	0.962631
cd	7.04574	8.04219	7.51877	7.72904	8.02202	7.78088	13.1012	10.7565	7.5479	3.68197	-0.0691596	3.77093	0.112214	0.738442	1
CD98hc	359.333	371.59	373.746	395.285	372.593	370.148	385.757	340.045	386.201	362.842	0.0231282	8.64963	0.146408	0.702923	1
Cda4	0.828911	0.41242	0.313282	0.662489	0.530382	0.247012	0	1.73492	0	2.6778	-0.843161	0.982132	2.06319	0.154474	0.727525
Cda5	97.1898	95.0628	81.1401	86.7861	111.977	90.5299	133.923	126.823	119.194	152.3	-0.383096	7.14121	12.1008	0.000788841	0.0613341
Cda9	1.65782	0.41242	1.56641	1.10415	0.928168	1.60558	0	1.38794	1.88698	1.00417	-0.331195	0.636625	0.399004	0.529257	1
CDase	66.7273	69.0803	80.5135	64.924	63.9773	65.0877	53.8603	58.9873	51.8918	62.2588	0.223812	5.87697	5.03332	0.0273986	0.413998
cdc14	114.804	113.415	102.443	109.752	110.253	117.331	120.822	134.977	122.653	110.459	-0.139318	7.02542	3.77179	0.0553526	0.533885
Cdc16	13.8843	16.2906	16.604	14.5748	14.3866	12.8446	7.27843	13.8794	10.6929	11.3806	0.337942	3.89474	5.14123	0.0258369	0.402771
cdc2	6.63128	0.61863	1.56641	0.44166	1.98893	0.741036	0	0.693969	0.943488	0	1.85146	1.39423	6.07546	0.0156685	0.320918
Cdc23	3.93733	3.29936	5.95236	5.29992	5.7679	5.55777	2.91137	5.37826	5.97542	5.02087	-0.118835	2.47053	0.211369	0.646841	1
Cdc27	44.3467	44.7475	44.1728	50.3492	50.6514	50.761	50.949	46.3224	45.6019	52.2171	-0.0610158	5.59861	0.348188	0.684472	1
cdc2c	7.66742	11.3415	8.14534	9.27485	9.61317	8.64542	8.73411	9.02159	7.5479	10.3765	0.063126	3.31233	0.060812	0.805797	1
cdc2rk	12.4337	8.04219	11.5914	11.4831	11.4032	11.1155	14.5569	10.7565	13.5233	10.7112	-0.0919122	3.68698	0.438675	0.705083	1
Cdc37	30.4625	29.488	37.2806	34.4494	39.4471	36.9283	30.5694	25.1564	35.2235	32.803	0.087884	5.15592	0.214475	0.644437	1
Cdc42	87.2428	106.198	104.323	95.1776	100.706	100.904	119.366	103.401	114.162	96.7355	-0.103599	6.67131	2.54192	0.114479	0.707863
CDC45L	18.8577	9.27944	12.5313	12.5873	14.7844	14.6972	21.8353	9.88906	10.6929	11.7154	0.108862	3.87373	0.263982	0.608698	1
Cdc5	22.795	26.8073	23.4962	31.3578	26.3865	25.5658	24.7466	21.86	25.7887	24.4349	0.102186	4.67973	0.360515	0.549778	1
Cdc6	4.97346	0.41242	0.626564	0.883319	2.25412	0.494024	0	0.520477	0.314496	0.66945	1.94337	0.96099	6.43137	0.0129941	0.289802
Cdep	316.229	395.923	341.478	360.836	375.908	380.275	355.187	371.273	391.862	398.323	-0.0848876	8.58972	0.773314	0.381611	0.928891
CdGAPr	78.1248	80.2156	85.526	74.1988	82.5406	81.3905	93.1638	83.9702	80.8254	82.0076	-0.0616631	6.32206	0.416046	0.520611	1
cdi	121.85	124.551	106.829	110.415	118.341	118.319	93.1638	131.507	129.258	104.769	-0.00460569	7.01822	0.00235133	0.961436	1
Cdk12	63.4117	68.2555	69.2354	66.6906	64.7066	67.4343	65.5058	59.8548	54.4078	66.2755	0.0866305	5.94411	1.3794	0.243401	0.844481
Cdk4	16.371	18.3527	21.9298	18.3289	18.6297	14.9442	14.5569	15.7878	20.7567	17.4057	0.15045	4.35087	0.978082	0.32541	0.88795
Cdk5	27.1468	21.0334	23.8094	20.3163	24.729	26.5538	32.0251	27.5853	27.6756	20.4182	-0.168011	4.57173	2.40465	0.124598	0.727525
Cdk5alpha	185.883	187.032	191.102	199.851	183.844	200.45	213.986	189.453	210.083	208.199	-0.10611	7.77097	2.92229	0.0909215	0.644425
Cdk7	11.812	8.04219	10.9649	7.28738	9.34798	7.53387	7.27843	8.8481	11.0074	7.36395	0.150966	3.21356	0.587377	0.445506	0.990522
Cdk8	6.21683	3.91799	3.13282	2.42913	4.30935	4.0757	1.45569	3.12286	3.14496	4.0167	0.227059	2.2188	0.680267	0.411746	0.956699
Cdk9	24.4529	16.703	18.4836	17.4456	19.3589	19.0199	18.9239	16.8287	25.4742	22.4266	-0.0861966	4.40825	0.461737	0.674658	1
Cdlc2	0	0	0	0	0	0	0	0	0	0	0	-1.29815	0	1	1
cdm	156.25	152.389	134.711	161.206	155.998	166.857	184.872	164.471	165.11	174.057	-0.162616	7.26105	8.44403	0.0046418	0.166617
CdsA	746.848	799.476	777.253	807.133	734.844	789.945	899.613	856.878	812.972	780.244	-0.0976379	9.74586	0.906247	0.343744	0.899207
CecA1	0.414455	0.61863	0.626564	0.22083	0.0662977	0.370518	0	0	0	1.67362	-0.383734	2.34376	0.0252451	0.874125	1
CecA2	0.414455	0	0	0	0.0662977	0.123506	0	0.173492	0	0	-0.0199129	1.58751	8.57312e-05	0.992634	1
CecB	0.207228	0	0	0.22083	0.132595	0.247012	0	0	0	0	0.324817	0.624845	0.020123	0.887595	1
CecC	2.69396	0.20621	0	0.44166	0.331489	0.61753	0	0.346984	0.314496	0	0.856026	2.00865	0.204607	0.652205	1
Ced-12	23.2095	32.1687	26.629	27.8246	26.8506	22.7251	34.9364	27.5853	22.6437	25.4391	0.0917868	4.80813	0.764642	0.384283	0.930904
ced-6	182.568	201.673	200.187	175.56	196.705	157.964	179.049	180.779	166.997	166.024	0.172775	7.42472	4.89595	0.0295328	0.43257
Cen	88.9007	77.9473	90.5386	80.1612	87.513	76.9443	65.5058	73.5607	93.0908	93.0535	0.0645145	6.2983	0.351884	0.554585	1
CenB1A	60.3032	55.2642	62.6564	66.6906	59.9994	68.9164	49.4933	61.5897	63.5282	56.5685	-0.00428676	5.98421	0.00258483	0.959568	1
CenG1A	123.508	133.005	130.952	124.327	125.303	135.857	154.303	137.059	136.177	122.844	-0.0985944	6.85928	1.66856	0.199865	0.776573
Cenp-C	6.63128	7.62977	4.07267	4.4166	7.75683	7.53387	7.27843	6.07223	7.8624	7.36395	-0.189462	2.96348	0.463692	0.497708	1
Cep135	10.5686	9.07323	10.3383	11.2623	8.7513	10.1275	5.82274	8.67461	10.0639	9.70702	0.0865176	3.4614	0.179087	0.940004	1
Cep89	0	0	0	0	0	0	0	0	0	0	0	-1.2483	0	1	1
Cep97	45.5901	47.0159	40.7267	39.0869	42.6294	46.1913	34.9364	39.3827	50.6338	49.5393	-0.0611454	5.50172	0.313801	0.576794	1
cer	25.6962	32.9936	38.2204	28.487	31.4914	22.7251	13.1012	23.4214	17.6118	25.4391	0.543387	4.551	12.9488	0.000530684	0.0534139
Cerk	79.161	69.6989	75.501	71.1072	77.5683	76.2032	64.0501	73.7342	62.8992	75.3131	0.0705082	6.436	1.2007	0.286582	0.882172
cert	56.7804	54.4394	50.1252	54.7658	59.2701	62.7411	56.7717	51.3537	51.8918	50.8782	0.0131801	5.59057	0.0300851	0.862699	1
cerv	14.2987	14.8471	14.7243	13.2498	13.0606	17.6614	16.0125	10.7565	15.7248	14.7279	-0.0868088	3.82754	0.483026	0.488903	1
Cf2	110.66	122.076	105.263	87.2278	107.27	103.004	106.265	125.782	116.049	110.794	-0.0815422	6.55094	0.610921	0.436559	0.980309
Cfp1	22.1734	15.2595	21.9298	20.3163	18.3645	21.8606	11.6455	18.7372	16.0393	19.414	0.0802208	4.17625	0.200204	0.655666	1
cg	216.346	240.647	208.019	209.347	223.887	236.02	209.619	219.815	245.936	241.002	-0.0731771	7.79686	1.51239	0.222084	0.809499
CG10000	0	0.20621	0	0	0.0662977	0	0	0	0.314496	0	0.170238	-1.03165	0.0282218	0.867093	1
CG10005	0	0.20621	0.313282	0.22083	0.132595	0.247012	0	0.173492	0	0.334725	-0.205004	-0.757912	0.0544205	0.816089	1
CG10011	141.329	161.462	147.869	154.581	150.96	153.148	129.556	155.102	156.933	160.668	-0.00827748	7.31117	0.00521065	0.94262	1
CG10013	0.414455	0	0	0	0.0662977	0	0	0	0	0	2.25322	-1.23566	3.70577	0.0853424	0.628587
CG10014	0	0	0	0.22083	0.0662977	0.123506	1.45569	0	0	0	-0.502621	2.43845	0.244824	0.654252	1
CG10019	23.4167	33.406	17.8571	27.1621	23.9335	24.2072	16.0125	25.1564	25.7887	25.4391	0.0630251	4.36495	0.155639	0.694167	1
CG10026	14.9204	21.2396	28.5087	15.4581	25.0605	11.8566	7.27843	17.1757	16.9828	16.7362	0.508885	3.93782	5.48643	0.0214429	0.368629
CG10029	0	0	0	0	0	0	0	0	0	0	0	-1.29851	0	1	1
CG10031	30.4625	29.9004	36.0275	21.4205	32.2207	13.8327	7.27843	18.2167	16.9828	16.0668	0.95596	4.59264	9.23367	0.00313553	0.13694
CG10032	0	0	0	0	0	0	0	0	0	0	0	-1.29805	0	1	1
CG10035	0.414455	0.61863	0	0.44166	0.265191	0.123506	0	0.693969	0.628992	0.66945	-0.360895	0.103006	0.246343	0.620911	1
CG10038	10.7758	10.5167	12.218	11.0415	12.6629	11.7331	13.1012	11.7975	9.74937	11.0459	0.0206007	3.57252	0.0159995	0.899636	1
CG10041	0	0.20621	0.626564	0	0.265191	0	0	0.346984	0.628992	0.334725	-0.295878	-0.747885	0.102077	0.847131	1
CG10050	5.18069	5.36146	5.3258	4.4166	6.16569	5.43427	5.82274	4.3373	4.40294	8.70285	-0.0666271	2.61481	0.0933978	0.858408	1
CG10051	0.828911	0	0.313282	0.44166	0.530382	1.11155	0	0.173492	0.943488	0.66945	-0.608063	-0.251973	0.773431	0.381576	0.928891
CG10053	3.52287	5.36146	2.19298	4.85826	5.23752	5.43427	5.82274	2.60238	5.34643	2.34307	0.0786465	2.10231	0.0916403	0.762823	1
CG10055	24.8673	22.8893	16.9172	23.8496	23.4031	23.4661	21.8353	23.0745	24.8452	22.0918	-0.0434987	4.47945	0.110257	0.797034	1
CG10062	11.3975	16.0844	15.9774	14.1331	12.5303	12.7211	11.6455	15.6143	8.49139	9.70702	0.226529	3.60266	1.81105	0.300466	0.882172
CG10063	0.207228	0	0.313282	0.22083	0	0	0	0	0.314496	0	0.802026	-1.08449	0.440444	0.555473	1
CG10064	0	0	0	0.22083	0	0	0	0	0	0	1.21083	-0.831863	1.04086	0.32055	0.882172
CG10068	25.0745	25.7762	24.7493	21.8622	26.5191	24.2072	34.9364	29.4937	27.0466	24.1002	-0.127066	4.5937	1.12035	0.448452	0.993018
CG10073	0.207228	0	0.626564	0	0.331489	0.123506	0	0.693969	0.314496	0	-0.26776	-0.417945	0.0771289	0.781884	1
CG10075	18.8577	18.5589	18.7969	27.1621	22.2097	17.6614	29.1137	20.9926	17.6118	21.7571	0.0561698	4.46526	0.223386	0.637653	1
CG10077	2678	2765.48	2685.77	2617.5	2696.92	2933.89	3100.61	3239.97	2950.92	2821.06	-0.162395	11.2953	3.09343	0.0821182	0.628587
CG10081	0	0	0	0	0	0	0	0	0	0	0	-1.29808	0	1	1
CG10082	397.255	374.683	384.084	478.097	397.322	418.191	375.567	407.013	385.886	401.335	0.0291418	8.60236	0.198984	0.656648	1
CG10086	0	0	0	0	0	0	0	0	0	0	0	-1.05947	0	1	1
CG10089	67.5562	53.6146	68.9221	62.4948	63.248	71.8805	68.4172	77.551	77.995	78.3256	-0.254292	6.12206	7.79109	0.00645026	0.196632
CG10092	13.2626	13.6099	16.2907	15.2373	13.7899	15.3148	10.1898	14.2264	13.2088	15.3973	0.0166244	3.99127	0.0210477	0.884984	1
CG10096	0	0	0	0	0	0	0	0	0	0	0	-1.30545	0	1	1
CG10097	0	0	0	0	0	0	0	0	0	0	0	-1.30545	0	1	1
CG10098	42.4817	46.3972	45.7392	49.9075	46.0769	49.7729	45.1262	42.8526	38.054	40.5017	0.091099	5.54119	1.1702	0.417972	0.963397
CG10103	64.8623	64.9561	69.2354	73.3155	66.2314	69.1634	69.8729	73.7342	77.6805	65.6061	-0.0756963	6.15732	0.900461	0.345281	0.900175
CG10104	0	0	0	0	0	0	0	0	0	0	0	-1.28358	0	1	1
CG10116	0.828911	0.61863	0.939847	0.883319	0.662977	0.61753	0	0.520477	0.314496	0.334725	0.712079	0.183912	1.25971	0.264787	0.878078
CG10126	38.1299	40.8296	38.847	41.0743	39.0493	36.1873	36.3921	42.8526	40.8845	35.4808	0.0366451	5.26568	0.10467	0.74707	1
CG10131	20.7228	13.1974	15.3508	17.4456	16.6407	17.0438	8.73411	9.02159	9.12038	15.0626	0.433991	3.58612	4.20168	0.043389	0.510744
CG10132	109.002	108.054	103.383	122.119	119.27	133.016	98.9866	108.606	125.169	138.241	-0.117152	6.94382	1.35318	0.247897	0.850056
CG10133	6.42406	6.59872	6.26564	8.1707	6.56347	8.89244	4.36706	6.41921	5.97542	9.3723	-0.127871	2.89973	0.546534	0.461723	1
CG10137	73.1514	70.9362	61.7166	75.0821	75.049	80.5259	74.2399	80.1534	80.511	72.3006	-0.126627	6.34091	3.10842	0.0813926	0.628587
CG10139	16.7854	17.3216	14.7243	18.108	16.4418	17.2908	18.9239	12.4914	16.6683	16.4015	0.065709	4.05346	0.21529	0.643809	1
CG10140	0.207228	0.20621	0.939847	0	0.132595	0	0	0.173492	0	0	1.87036	-0.91156	3.23507	0.0963605	0.660312
CG10144	20.1011	19.3837	20.0501	23.8496	21.4805	20.6255	17.4682	18.2167	21.0712	20.0835	0.0900197	4.55439	0.654052	0.420869	0.965314
CG10147	16.9927	16.9092	16.604	12.1456	13.0606	16.6733	16.0125	14.7468	11.3219	11.7154	0.097432	3.54101	0.326389	0.89692	1
CG10151	17.4071	20.8272	17.2305	20.0955	17.9004	22.9721	27.658	19.6046	26.1032	26.4433	-0.36011	4.60787	7.45704	0.00764605	0.215652
CG10154	0	0	0	0	0	0	0	0	0	0	0	-1.30545	0	1	1
CG10157	24.6601	14.6409	21.6165	18.108	32.8837	12.5976	16.0125	10.93	13.8378	14.0584	0.80153	3.75936	9.19612	0.00319415	0.137905
CG10158	15.9565	16.2906	20.0501	18.9914	18.033	16.4263	24.7466	19.2576	17.6118	17.4057	-0.0406098	4.26453	0.0982209	0.988502	1
CG10163	0	0	0	0	0	0	0	0	0	0	0	-1.22641	0	1	1
CG10164	0	0	0	0	0	0	0	0	0	0	0	-1.24807	0	1	1
CG10165	6.83851	7.83598	5.01252	7.94987	8.95019	6.66933	7.27843	7.80715	4.40294	3.34725	0.336696	3.10834	2.62136	0.109047	0.693808
CG10166	16.9927	15.0533	25.0626	18.9914	16.6407	17.2908	17.4682	17.5227	15.4103	12.3848	0.196027	4.18526	2.25618	0.282763	0.882172
CG10168	0	0	0	0	0	0	0	0.173492	0	0	-1.53675	-1.28375	2.4591	0.169634	0.727525
CG10170	0	0	0	0	0	0	0	0	0	0	0	-1.00613	0	1	1
CG10171	15.9565	15.0533	14.0977	12.8081	11.6684	9.88048	13.1012	15.4408	9.74937	8.70285	0.293396	3.79855	3.55521	0.0626895	0.560715
CG10175	65.2767	69.4927	82.3932	57.4157	76.9053	51.3785	59.6831	91.2569	45.6019	54.2254	0.20858	6.0865	1.67069	0.199582	0.775831
CG10176	27.5613	23.3017	33.5212	20.5372	22.4749	19.1434	21.8353	31.9226	15.4103	27.1127	0.116178	4.36257	0.356665	0.551912	1
CG10177	0.621683	0.41242	0	0.662489	0.86187	0.247012	0	0.346984	0	0	1.52746	-0.061879	4.752	0.0319597	0.447597
CG10178	24.6601	29.2818	29.4485	23.408	32.0218	16.5498	18.9239	24.6359	18.2408	20.0835	0.493967	4.86079	6.6488	0.0115998	0.273053
CG10182	0	0	0	0	0.0662977	0	0	0.173492	0	0	-0.459466	-0.962565	0.100308	0.752443	1
CG10183	0	0	0	0	0.0662977	0	0	0	0.314496	0	-0.519297	-1.09625	0.150513	0.751481	1
CG10184	11.1903	8.2484	8.7719	12.8081	10.7402	7.53387	7.27843	7.63366	11.3219	9.03757	0.276201	3.53662	1.97991	0.162956	0.727525
CG10185	47.0407	2.68073	49.8119	41.7368	30.3643	59.7769	27.658	19.2576	41.828	44.1837	-0.226695	4.85916	0.0999393	0.752658	1
CG10186	1284.4	1333.15	1327.69	1506.94	1428.52	1616.08	1413.47	1382.91	1495.74	1546.09	-0.115914	10.4472	2.17106	0.144231	0.727525
CG10188	90.144	97.3311	87.4057	101.361	102.761	108.438	96.0752	95.7677	110.074	101.422	-0.0989167	6.77495	1.45579	0.230865	0.823561
CG10189	15.5421	14.4347	16.2907	24.5121	19.9556	15.8088	29.1137	16.4818	20.7567	19.414	-0.0593614	4.01575	0.177121	0.674895	1
CG10194	15.1276	15.0533	11.9047	10.1582	13.7899	12.2271	8.73411	11.1035	12.5798	18.4099	0.0357487	3.92168	0.0612739	0.805076	1
CG10195	16.371	16.2906	18.7969	14.7956	14.5192	13.4622	10.1898	12.8384	12.8943	13.7237	0.304669	3.95767	4.77299	0.0315929	0.446886
CG10202	0	0	0	0	0	0.123506	0	0	0	0	-1.49584	-0.661446	2.20777	0.169634	0.727525
CG10205	71.0791	67.2244	72.6815	69.7822	89.303	78.3028	98.9866	91.7774	54.4078	87.6979	-0.127337	6.25391	1.08535	0.300384	0.882172
CG10208	4.76624	6.39251	7.20549	6.62489	7.75683	7.28686	4.36706	6.5927	7.5479	8.0334	-0.101077	2.85512	0.282684	0.739234	1
CG10209	17.4071	14.2285	18.7969	20.9788	17.4363	19.761	13.1012	11.1035	12.5798	15.3973	0.267182	4.06542	2.55497	0.113567	0.704609
CG10211	88.279	99.8056	81.4534	86.3445	100.773	102.881	61.1388	124.22	93.0908	86.0243	-0.0689976	6.27049	0.205712	0.651276	1
CG10214	14.7132	14.2285	16.604	17.4456	13.3921	15.3148	10.1898	12.6649	13.8378	17.4057	0.0810369	3.75384	0.389086	0.916989	1
CG10217	49.3202	44.5413	45.1126	45.2701	51.6459	49.4024	46.5819	54.8235	48.7469	41.8406	-0.0392392	5.68205	0.231489	0.641537	1
CG10219	148.789	119.808	114.975	158.556	145.126	139.685	244.555	158.225	153.16	157.321	-0.279055	7.37345	4.74343	0.0321107	0.447597
CG10222	7.66742	8.04219	6.57893	3.75411	6.36458	4.0757	5.82274	5.20477	5.66093	5.02087	0.379707	2.64265	2.67111	0.105791	0.684554
CG10226	213.03	224.356	219.298	205.151	187.954	166.239	211.074	170.543	201.592	218.241	0.124416	7.25651	1.91619	0.169811	0.727525
CG10232	0.828911	0.20621	0.939847	0.883319	0.928168	0.741036	0	0.867461	0.314496	0.66945	0.242379	0.473712	0.150498	0.699005	1
CG10237	182.153	137.336	164.786	170.481	172.043	179.207	151.391	251.911	149.071	185.772	-0.162714	7.20554	2.05391	0.155392	0.727525
CG1024	11.812	12.785	15.9774	17.4456	14.5192	17.1673	18.9239	11.1035	13.5233	15.3973	-0.0273638	3.9177	0.0420098	0.838079	1
CG10249	110.452	107.023	104.636	103.569	114.231	103.992	110.632	119.536	103.469	111.129	-0.0217155	6.99613	0.139518	0.818201	1
CG10252	0.414455	0.20621	0	0	0.0662977	0.123506	0	0.346984	0	0	-0.06898	-0.981903	0.00693879	0.933847	1
CG10253	42.8961	43.3041	43.2329	39.9702	43.6902	49.0319	59.6831	39.3827	44.3439	43.849	-0.110836	5.55793	1.62924	0.221122	0.807587
CG10254	87.2428	80.0094	77.0674	88.9944	87.9771	87.0718	64.0501	83.7967	69.5036	89.3715	0.0765662	6.53951	0.439402	0.50916	1
CG10257	14.7132	11.1353	14.0977	17.4456	14.3866	16.4263	16.0125	13.0119	19.4987	14.7279	-0.14235	4.37351	1.07274	0.303191	0.882172
CG10262	10.1542	7.01114	5.63908	9.49568	6.96126	9.75698	14.5569	8.8481	6.28992	7.02922	-0.142024	3.19087	0.602741	0.439635	0.984969
CG10264	0	0	0	0	0	0	0	0	0	0.334725	-1.60188	-1.24029	2.34498	0.169634	0.727525
CG10265	8.49633	7.01114	12.218	10.379	9.54687	7.78088	7.27843	7.28667	10.0639	6.35977	0.276587	3.22879	2.31532	0.131724	0.727525
CG10268	10.9831	11.9602	14.0977	11.9248	13.7899	10.992	5.82274	10.583	13.8378	13.7237	0.119919	3.15318	0.495464	0.483376	1
CG10274	13.4698	17.734	14.0977	13.9123	15.7789	16.4263	11.6455	12.8384	11.3219	9.70702	0.237089	3.91405	2.45457	0.120806	0.72117
CG10280	0	0	0	0	0	0	0	0	0	0	0	-1.24843	0	1	1
CG10283	49.7346	47.0159	52.0048	54.1033	46.8725	50.8845	48.0376	49.2718	44.3439	43.1795	0.0777838	5.66142	0.781257	0.757268	1
CG10286	10.5686	12.5788	12.8446	11.2623	12.9944	11.7331	5.82274	9.02159	7.8624	10.7112	0.327615	3.60222	3.39918	0.0686262	0.584345
CG10289	155.421	191.775	181.39	159.439	156.131	167.598	148.48	181.82	161.336	170.71	0.0156158	7.25068	0.0260121	0.872244	1
CG10298	0	0	0	0	0.0662977	0	0	0	0	0	1.07441	-1.27746	1.43295	0.32055	0.882172
CG10300	0	0	0	0	0	0.123506	0	0	0	0	-1.49117	-1.02446	1.81593	0.182936	0.748095
CG10301	0	0	0	0.22083	0.132595	0	0	0	0	0	2.14783	-0.950722	2.88776	0.0933897	0.653167
CG10306	92.6308	76.5039	80.2002	110.857	95.9991	87.0718	88.7968	79.6329	98.1227	92.3841	0.0368528	6.796	0.127376	0.722031	1
CG10307	39.9949	27.2197	37.9071	31.3578	31.4251	32.8526	36.3921	32.9635	24.8452	30.7947	0.101773	5.10287	0.437693	0.509983	1
CG10311	83.0983	64.5437	69.5486	81.2654	76.6401	79.6614	87.3411	89.6955	77.366	89.0368	-0.168676	6.19721	2.32034	0.131311	0.727525
CG10317	0	0	0.313282	0.883319	0.464084	0.247012	0	0.346984	0	0	0.856149	-0.886531	0.859242	0.357479	0.910506
CG10320	134.491	96.7124	111.215	148.398	121.789	106.215	147.024	87.9605	110.074	126.526	0.112911	6.99346	0.696465	0.406255	0.952833
CG10321	57.4021	50.5214	44.4861	59.8449	52.4415	51.749	46.5819	39.7297	46.8599	54.8949	0.143363	5.70899	1.8104	0.18195	0.746446
CG10324	5.80237	7.42356	11.2782	9.49568	6.89496	6.42231	4.36706	6.07223	11.0074	9.03757	0.074566	2.84345	0.0796425	0.778451	1
CG10326	83.72	85.9895	112.155	92.9693	79.8224	86.2072	93.1638	83.4497	101.582	86.0243	0.0139059	6.37914	0.0380633	0.84577	1
CG10332	0	0	0	0	0	0	0	0	0	0	0	-1.30545	0	1	1
CG10333	32.5347	37.5302	35.4009	39.0869	34.6737	33.7172	27.658	26.1973	39.312	35.4808	0.125855	5.00522	0.78107	0.379245	0.926483
CG10336	2.48673	2.26831	3.4461	1.54581	1.59114	0.988048	1.45569	1.04095	1.25798	3.01252	0.579636	1.26183	1.44206	0.233059	0.827312
CG10337	2.90119	1.85589	4.38595	1.54581	2.7845	3.58168	2.91137	3.46984	2.83046	3.01252	-0.290664	1.62132	0.729373	0.395427	0.94246
CG10338	20.93	24.7452	18.1704	17.8872	22.2097	22.3546	23.291	23.7684	17.9263	23.4307	-0.0794791	4.33532	0.437051	0.514326	1
CG10339	8.28911	7.42356	5.01252	7.50821	7.75683	9.13945	10.1898	10.7565	7.5479	6.35977	-0.261816	3.15341	1.73262	0.191527	0.76169
CG10340	38.5443	29.6942	43.5462	39.3077	38.1212	33.8407	42.2149	34.5249	38.3685	36.485	0.0521804	5.26226	0.186896	0.66658	1
CG10341	14.2987	14.4347	16.9172	15.2373	17.4363	16.4263	13.1012	14.0529	11.6363	15.3973	0.128895	3.77181	0.636519	0.427142	0.972225
CG10343	9.53247	11.3415	11.9047	10.5998	11.801	10.992	8.73411	9.02159	9.74937	9.03757	0.189638	3.54069	1.11747	0.293385	0.882172
CG10344	3.93733	4.1242	4.69923	5.52075	4.44195	3.45817	5.82274	6.5927	4.08845	3.01252	0.0202029	2.11379	0.00513224	0.943053	1
CG10345	129.932	67.2244	68.6088	83.4737	70.0104	87.5658	69.8729	126.302	78.3095	96.4008	-0.156864	6.47468	0.736914	0.393005	0.940793
CG10347	16.7854	21.4458	18.7969	20.3163	17.2374	19.8845	21.8353	20.6456	18.2408	20.0835	-0.082204	4.38572	0.428219	0.514587	1
CG10348	6.42406	5.15525	5.3258	6.18323	5.03863	5.43427	8.73411	5.20477	5.34643	7.69867	-0.113483	2.47781	0.254551	0.615162	1
CG10352	23.2095	18.1465	20.6766	19.433	19.2263	15.3148	17.4682	16.6553	16.6683	20.4182	0.229003	4.03851	2.17735	0.143658	0.727525
CG10353	152.934	169.505	134.085	150.827	152.286	154.753	142.657	154.061	154.103	141.923	0.0201375	7.54977	0.0823891	0.828708	1
CG10357	0	0	0.313282	0	0.0662977	0.247012	0	0	0	5.3556	-3.58245	1.26081	2.87132	0.0939124	0.653582
CG10359	9.32524	10.1043	5.95236	7.28738	7.49164	6.91634	13.1012	8.8481	7.8624	10.7112	-0.125209	3.46047	0.397924	0.638509	1
CG10361	5.80237	8.2484	8.45862	7.72904	8.48611	3.21116	2.91137	4.16381	4.40294	5.69032	0.907982	2.997	10.0708	0.00208145	0.112007
CG10362	77.7104	79.1846	71.1151	81.4862	75.7783	82.8726	81.5184	84.4907	77.6805	83.6812	-0.0913853	6.47814	1.33033	0.251899	0.856881
CG10365	55.3298	46.8096	45.7392	47.0367	53.1045	57.5538	43.6706	54.65	48.7469	41.8406	-0.0115455	5.61501	0.0125471	0.91107	1
CG10366	19.6866	13.6099	17.2305	19.6539	20.2871	21.9841	17.4682	17.5227	20.4422	18.4099	-0.0954465	4.43305	0.518523	0.473399	1
CG10375	20.1011	22.2707	25.0626	26.4996	23.1379	20.502	14.5569	20.4721	19.1843	18.4099	0.279707	4.40598	4.47949	0.0371544	0.481049
CG10376	38.7516	33.1998	29.1352	35.9953	38.1212	36.0638	33.4808	36.2599	38.054	40.167	-0.0741011	5.08569	0.570929	0.71133	1
CG10383	41.4455	28.6632	28.822	28.487	36.7289	32.9761	18.9239	35.2189	26.4177	36.485	0.0726361	5.54183	0.121787	0.727946	1
CG10384	93.6669	93.8255	88.9721	102.686	100.971	106.462	87.3411	97.6761	114.162	117.488	-0.135302	6.76053	2.46747	0.119848	0.718786
CG10395	20.5155	17.5278	20.6766	18.7705	16.9722	18.6494	27.658	16.1348	18.5553	19.7488	-0.0252571	4.07598	0.0228609	0.880169	1
CG10396	0.207228	0.20621	0.626564	0.22083	0.198893	0.123506	0	0.693969	0.628992	0.334725	-0.565531	-0.744841	0.483113	0.488864	1
CG10399	3.93733	3.29936	3.75939	3.75411	5.23752	3.82869	2.91137	3.64334	2.83046	3.68197	0.226691	2.25751	0.717367	0.399328	0.945712
CG10405	0	0.20621	0	0	0.0662977	0.247012	0	0	0	0	-0.413599	-0.89003	0.112089	0.738711	1
CG10407	3.7301	3.91799	7.20549	3.53328	4.90603	5.55777	4.36706	4.3373	3.77395	6.6945	-0.130088	2.8238	0.233179	0.630387	1
CG1041	33.7781	29.9004	32.2681	26.4996	35.8008	26.0598	32.0251	30.7081	27.0466	31.4641	0.127165	4.94796	1.25241	0.266168	0.880137
CG10413	84.7561	99.187	90.5386	84.357	90.0323	94.3586	84.4297	95.2472	94.6633	85.0201	-0.0239482	6.50155	0.0452323	0.832074	1
CG10417	119.363	127.231	130.952	105.777	105.016	107.08	135.379	120.23	120.452	101.087	0.0214716	6.71051	0.0441357	0.834092	1
CG10418	4.14455	4.94904	5.63908	4.85826	4.83973	6.66933	5.82274	5.89873	5.34643	3.68197	-0.196285	2.52509	0.744055	0.390732	0.937429
CG10420	20.7228	20.0024	14.411	18.3289	18.0993	16.9203	14.5569	13.1854	18.5553	14.7279	0.228269	4.08094	2.49534	0.117805	0.71164
CG10424	15.9565	19.5899	16.604	15.0164	19.16	14.9442	11.6455	16.4818	13.2088	14.3932	0.252586	3.99328	3.35995	0.0702134	0.591883
CG10425	18.0288	13.4036	16.2907	14.1331	15.5137	15.0677	5.82274	11.7975	10.6929	11.0459	0.384385	3.99182	9.00336	0.00683714	0.202709
CG10426	30.2552	27.2197	27.2556	29.3704	27.381	34.7052	21.8353	29.6672	34.2801	31.1294	-0.147558	5.04272	2.53272	0.115128	0.707983
CG10428	24.0384	23.0955	23.4962	22.3038	23.3368	20.8725	18.9239	22.3805	23.9017	20.4182	0.107394	4.80932	1.11397	0.294138	0.882172
CG10431	2.90119	4.74283	5.3258	3.97494	3.71267	4.32271	2.91137	2.77588	4.08845	2.6778	0.228243	1.99759	1.00937	0.499381	1
CG10433	346.899	255.906	330.513	309.824	309.212	263.932	234.365	229.877	287.135	251.044	0.290355	8.17585	5.87369	0.017436	0.333698
CG10435	27.9757	24.7452	28.1954	26.9412	29.9003	32.3586	18.9239	24.8094	29.8771	34.4767	-0.0750392	4.95877	0.422835	0.517236	1
CG10440	34.607	29.0756	27.5688	37.0994	35.2041	40.3865	46.5819	37.4743	39.312	45.8573	-0.330876	5.22692	11.6366	0.000982127	0.0690254
CG10444	87.6573	67.0182	72.9948	74.4196	66.0325	62.7411	72.7843	77.551	76.4225	89.0368	-0.0414273	6.05944	0.108348	0.742822	1
CG10445	1.86505	2.0621	4.07267	1.76664	1.39225	1.85259	0	1.38794	2.51597	1.67362	0.31819	0.7218	0.506245	0.71101	1
CG10459	0.414455	0.20621	0.939847	0	0.662977	0.247012	0	0.867461	0.628992	0.334725	-0.0857492	0.120563	0.0165841	0.959873	1
CG10462	34.1926	35.4681	38.2204	32.2412	36.1985	26.1833	29.1137	30.8816	29.5626	33.1378	0.24611	5.08498	4.55544	0.0356218	0.471067
CG10463	3.93733	3.50557	5.63908	3.09162	5.50271	4.44622	2.91137	3.81683	2.51597	6.02505	0.0963047	2.57287	0.184147	0.668892	1
CG10465	74.8092	77.9473	84.5862	71.1072	69.8778	68.9164	91.7082	81.7148	71.0761	56.2338	0.0548794	5.92573	0.217967	0.641758	1
CG10466	5.38792	5.56767	4.38595	5.07909	3.97786	3.58168	8.73411	2.94937	3.45945	3.34725	0.390792	2.41575	3.46658	0.0659899	0.570741
CG10467	10.5686	11.5478	11.5914	12.5873	13.3258	10.1275	10.1898	9.71556	10.3784	6.6945	0.349994	3.4847	5.13072	0.0259848	0.404323
CG10469	4.14455	5.77388	4.38595	5.07909	3.97786	3.45817	2.91137	4.85778	4.40294	4.0167	0.18646	2.11166	0.624957	0.481236	1
CG10470	18.6505	17.734	20.9899	19.433	20.8838	20.749	5.82274	20.6456	14.7813	14.3932	0.210812	4.40374	2.44022	0.22417	0.813029
CG10472	3.10841	3.29936	3.4461	4.4166	4.04416	3.95219	1.45569	4.3373	4.40294	2.34307	0.00615776	2.56379	0.000325809	0.98564	1
CG10474	0	0	0	0	0	0	0	0	0	0	0	-1.29821	0	1	1
CG10476	0	0	0	0	0	0	0	0	0	0	0	-1.30545	0	1	1
CG10477	0	0.20621	0.313282	0.22083	0.132595	0	0	0	0.314496	0	1.27827	-0.229619	0.888127	0.349575	0.903636
CG10479	29.0119	30.7253	36.654	34.6703	26.055	28.7769	29.1137	27.9322	30.8206	34.1419	0.0490929	4.79414	0.139397	0.892751	1
CG10481	0	0	0	0	0	0	0	0	0	0	0	-1.29879	0	1	1
CG10483	43.1033	42.273	50.1252	45.4909	42.5631	49.8964	49.4933	39.2092	44.3439	45.5226	-0.0242625	5.55017	0.0886857	0.766563	1
CG10486	0	0	0	0	0.0662977	0	0	0	0	0	1.07675	-1.05922	1.02331	0.32055	0.882172
CG10492	54.0864	51.9649	46.679	53.6616	54.8945	55.2072	58.2274	54.1296	59.1252	57.5727	-0.112857	5.85315	1.86006	0.211946	0.795344
CG10494	8.91079	8.66081	5.01252	5.9624	8.15462	6.91634	2.91137	8.50112	8.49139	8.36812	-0.0272255	3.01404	0.018791	0.946409	1
CG10495	3.7301	4.74283	4.38595	3.97494	4.70714	4.32271	0	6.41921	3.45945	8.0334	-0.229219	2.47323	0.847007	0.35994	0.911293
CG10505	1.45059	1.23726	1.56641	2.87079	1.45855	2.34661	2.91137	1.38794	2.51597	1.3389	-0.224491	1.53812	0.420641	0.518322	1
CG10508	101.956	94.6503	98.3706	101.582	102.032	124.865	107.721	112.076	133.032	116.15	-0.259262	6.89505	14.7903	0.000228056	0.0355782
CG10510	0	0	0	0	0.0662977	0	0	0	0	0	1.07487	-1.23652	1.23312	0.32055	0.882172
CG10512	45.7973	40.2109	42.2931	46.3743	46.9388	36.1873	39.3035	42.6791	31.1351	45.1879	0.193122	5.52364	1.4806	0.226965	0.816439
CG10513	13.2626	11.1353	12.8446	14.5748	13.4584	10.8685	26.2023	18.2167	28.3046	23.7655	-0.631207	4.63784	13.6304	0.000387249	0.0428974
CG10514	9.11802	6.59872	9.71175	9.71651	7.82313	8.39841	7.27843	9.36858	5.03193	8.70285	0.101829	2.9165	0.253477	0.877869	1
CG10516	12.6409	13.8161	16.604	10.5998	18.0993	10.745	11.6455	10.583	9.43488	10.7112	0.462198	3.85536	4.04862	0.0472948	0.522823
CG10527	187.127	187.857	197.994	213.984	211.357	212.43	231.454	220.162	165.11	180.417	-0.00923103	7.74114	0.00835617	0.927375	1
CG10543	84.3416	101.249	96.8042	91.2027	99.1814	98.8048	93.1638	98.8906	97.8082	109.79	-0.0808773	6.5047	0.612618	0.435925	0.979545
CG10550	206.606	204.148	210.839	211.997	197.435	192.175	199.429	208.364	174.86	183.764	0.105991	7.29341	1.63302	0.204678	0.78524
CG10553	12.2264	18.1465	12.8446	16.5622	15.1159	10.8685	16.0125	16.8287	13.2088	18.7446	0.0198399	4.06222	0.00701482	0.933444	1
CG10555	41.86	41.242	32.5813	37.7619	40.8394	47.1793	29.1137	43.5465	40.2555	39.1628	-0.0776465	5.34073	0.579188	0.448685	0.993401
CG10559	2.07228	1.44347	3.75939	1.98747	1.79004	1.72908	4.36706	1.90841	2.83046	1.67362	-0.020708	1.32977	0.00449575	0.947589	1
CG10560	25.489	37.9426	27.5688	34.8911	29.171	28.0359	34.9364	29.3202	30.5061	32.803	0.0208051	4.82432	0.0137249	0.907008	1
CG10561	56.5731	46.8096	51.065	57.8574	53.4359	49.8964	61.1388	59.6813	49.6904	59.581	-0.0611363	5.74887	0.457169	0.606941	1
CG10562	11.812	13.4036	13.4711	10.379	11.4032	11.2391	11.6455	11.7975	7.5479	9.03757	0.232612	3.6514	2.13026	0.167663	0.727525
CG10565	71.4935	70.9362	66.4158	76.1863	76.375	65.4582	55.316	58.6404	72.0196	64.6019	0.182243	6.22722	1.49656	0.224498	0.813029
CG10566	31.4986	28.8694	34.1478	37.3202	30.1655	32.7291	53.8603	29.3202	42.1425	33.1378	-0.170039	5.18292	1.60294	0.208861	0.791748
CG10570	0	0	0	0	0	0	0	0	0	0	0	-1.30545	0	1	1
CG10576	79.5754	82.6902	84.5862	76.1863	101.833	72.4981	55.316	58.9873	64.1572	56.2338	0.454655	6.33279	9.29639	0.00304008	0.134611
CG10581	6.63128	4.1242	5.95236	5.52075	4.90603	4.32271	4.36706	5.55175	7.5479	4.68615	0.00655482	2.43318	0.000924184	0.975817	1
CG10584	13.0553	10.1043	12.8446	14.3539	13.1269	12.5976	14.5569	14.3999	16.9828	13.7237	-0.173384	3.79373	1.65104	0.246339	0.848022
CG10585	22.5878	29.9004	23.1829	27.3829	29.9003	33.4701	30.5694	29.8407	36.167	30.46	-0.26876	4.94229	7.84549	0.00627479	0.194008
CG10587	0	0	0	0	0	0	0	0	0	0	0	-1.30545	0	1	1
CG10588	0	0	0.313282	0	0	0	0	0	0	0	1.23614	-1.20137	1.38335	0.32055	0.882172
CG10589	0	0	0	0	0	0	0	0	0	0	0	-1.25546	0	1	1
CG10590	38.5443	35.8805	41.3532	40.191	41.9664	40.263	32.0251	42.6791	35.8525	34.8114	0.065215	5.34357	0.54822	0.556467	1
CG10591	0	0	0	0	0.0662977	0	0	0	0	0	1.07603	-1.1336	1.05929	0.32055	0.882172
CG10592	0	0	0	0	0.198893	0	0	0	0	0	2.05755	-0.567114	2.44576	0.125144	0.727525
CG10597	0	0	0	0	0	0	0	0	0	0	0	-1.22699	0	1	1
CG10598	0	0	0	0	0	0	0	0	0	0	0	-1.27041	0	1	1
CG10600	72.1152	82.0715	78.6338	76.8488	74.9164	74.4741	66.9615	66.7945	75.7935	79.6645	0.0726335	6.31957	0.643452	0.424645	0.969433
CG10602	62.9972	64.1313	72.9948	64.4823	64.8392	61.753	49.4933	65.58	60.3832	51.5476	0.164997	5.93946	3.99962	0.0486236	0.522845
CG10616	31.4986	27.6321	27.8821	27.3829	26.5191	32.7291	32.0251	28.2792	31.4496	19.7488	-0.0281273	4.82261	0.079045	0.779262	1
CG10621	23.2095	40.0047	37.2806	35.5536	30.6958	5.43427	18.9239	15.7878	11.9508	46.8615	0.828036	5.50022	3.34566	0.0708015	0.592444
CG10623	24.2456	28.6632	24.436	28.487	27.7124	31.1235	32.0251	24.2889	27.9901	28.1169	-0.0813722	4.96352	0.599137	0.441002	0.986333
CG10625	2.90119	2.26831	4.38595	1.76664	2.38672	3.95219	2.91137	3.29635	3.14496	4.68615	-0.472806	1.99888	2.58758	0.11132	0.699233
CG10628	9.32524	13.4036	11.5914	14.3539	12.5303	11.4861	10.1898	7.46016	9.74937	12.0501	0.274273	3.69959	2.5308	0.115264	0.707983
CG10631	166.611	178.578	152.568	170.039	176.286	181.183	154.303	181.993	162.909	179.747	-0.0335423	7.34753	0.110531	0.740338	1
CG10635	23.0023	21.4458	28.822	26.9412	24.729	26.5538	17.4682	17.6962	23.9017	21.7571	0.177557	4.40328	1.11058	0.294869	0.882172
CG10638	65.8984	48.2531	58.2705	66.4698	59.3364	56.9363	50.949	61.9367	66.3586	54.5602	0.0216713	5.41327	0.0349454	0.852145	1
CG10639	34.8142	30.9315	31.6415	35.1119	38.6516	31.6175	46.5819	34.8719	33.6511	39.8323	-0.071222	5.31354	0.416989	0.52014	1
CG10646	11.1903	10.9291	10.9649	11.0415	10.1435	11.4861	8.73411	9.71556	15.4103	13.0543	-0.141279	3.50013	0.839941	0.361942	0.911293
CG10650	3.93733	0.82484	1.56641	2.87079	4.24305	3.58168	0	2.77588	5.03193	2.34307	-0.15162	2.11403	0.122769	0.726895	1
CG10651	0	0	0	0	0	0.494024	0	0.173492	0	0	-3.24859	-0.80652	9.23427	0.00345233	0.142586
CG10654	30.048	26.3949	32.8946	26.0579	28.1102	31	29.1137	25.1564	28.3046	29.7905	-0.000171907	4.77213	1.98401e-06	0.998879	1
CG10657	45.7973	43.0979	46.679	48.5826	56.8834	47.4263	71.3286	73.9077	42.7714	52.2171	-0.222084	5.56239	2.15968	0.145274	0.727525
CG10659	0	0	0	0	0	0	0	0	0	0	0	-1.049	0	1	1
CG10660	16.7854	15.0533	16.2907	16.1206	14.917	13.3387	18.9239	17.3492	17.2973	13.0543	0.0199004	4.17812	0.0236923	0.878026	1
CG10663	5.38792	4.53662	4.38595	4.63743	4.44195	5.31076	18.9239	9.19509	8.80589	4.68615	-0.777416	2.47793	9.35656	0.00295135	0.133065
CG10669	22.795	20.8272	17.5438	22.7455	21.0164	25.6893	30.5694	16.8287	26.4177	26.778	-0.216474	4.45886	3.531	0.0635729	0.562043
CG10671	23.2095	24.1266	28.5087	29.1495	29.5025	29.1474	24.7466	27.0648	32.7076	24.1002	-0.0507185	4.96172	0.252295	0.675096	1
CG10672	40.2022	38.5612	34.461	40.6327	42.099	37.6693	43.6706	37.8213	32.0786	41.1712	0.0521782	5.34835	0.199781	0.656006	1
CG10674	11.1903	13.1974	13.7844	13.4706	13.9225	14.2032	14.5569	10.93	10.6929	8.70285	0.17617	3.7177	1.48952	0.225582	0.814338
CG10680	114.597	119.396	128.132	73.7572	143.402	64.2231	46.5819	61.9367	54.7223	59.581	0.986573	6.96691	6.4262	0.0130293	0.289816
CG10681	5.80237	4.53662	9.39847	5.74157	8.6187	6.29881	14.5569	8.15413	9.12038	9.70702	-0.333722	3.07187	2.60814	0.335315	0.892524
CG10688	16.9927	16.2906	16.604	16.5622	17.0385	12.8446	11.6455	14.3999	11.0074	11.0459	0.429841	3.81924	7.77285	0.00651023	0.197052
CG10694	0	0	0	0	0	0	1.45569	0	0	0	-1.66328	-1.1271	2.08345	0.169634	0.727525
CG10700	0	0	0	0	0	0	0	0	0	0	0	-1.19658	0	1	1
CG10702	35.4359	33.6122	37.2806	44.3868	33.6129	27.9124	37.8478	34.0045	39.6265	41.1712	0.0470958	5.29193	0.205049	0.651801	1
CG10710	3.52287	5.15525	3.4461	7.28738	6.03309	4.19921	0	4.85778	5.03193	5.02087	0.23607	2.62807	1.07914	0.301763	0.882172
CG10713	25.2818	26.8073	24.436	26.7204	25.4583	30.3825	34.9364	27.4118	35.8525	26.1085	-0.24108	4.74892	4.6647	0.0335341	0.456407
CG10721	13.2626	13.4036	15.0375	18.9914	14.7844	14.8207	7.27843	18.3902	13.2088	17.4057	-0.0156068	4.28273	0.0137681	0.906862	1
CG10725	0	0	0	0	0	0	0	0	0	0	0	-1.13901	0	1	1
CG10730	0.414455	0.61863	0	0.22083	0.198893	0.494024	0	0.867461	0	0	-0.410814	-0.481186	0.322204	0.571745	1
CG10731	8.70356	8.66081	8.45862	5.52075	6.89496	8.76893	11.6455	6.41921	10.3784	10.3765	-0.253135	3.37365	2.36457	0.12774	0.727525
CG10732	97.397	102.28	97.1175	106.44	98.9825	107.327	82.974	108.953	94.9778	98.7438	0.00915072	6.58014	0.00714072	0.93285	1
CG10734	0	0	0	0	0.198893	0.123506	0	0	0.314496	0.334725	-0.767958	-1.01926	0.497949	0.583336	1
CG10737	314.779	289.106	280.388	277.362	281.235	327.168	280.947	377.172	286.191	312.633	-0.140161	8.2595	2.95592	0.0891125	0.638569
CG10738	9.11802	8.04219	8.45862	9.71651	8.95019	8.64542	7.27843	7.98064	9.43488	7.02922	0.109705	3.31074	0.356055	0.552252	1
CG1074	19.8939	19.5899	21.3032	15.2373	19.3589	20.6255	21.8353	11.4505	14.4668	21.4224	0.130106	4.17683	1.06557	0.304804	0.882172
CG10747	27.354	25.3638	32.2681	30.9162	30.2981	34.5817	33.4808	33.137	24.2162	25.7738	-0.0468575	4.95873	0.204362	0.652345	1
CG10748	0	0	0	0.22083	0	0	0	0	0	0	1.21445	-1.29811	1.2205	0.32055	0.882172
CG10749	0	0	0	0	0	0	0	0	0	0	0	-1.29809	0	1	1
CG10750	0	0	0	0.22083	0	0	0	0	0	0	1.21416	-1.24678	1.06564	0.32055	0.882172
CG10752	0	0.61863	0	0.44166	0.331489	0.123506	0	0.173492	0	0	1.45585	-0.90431	2.1645	0.146529	0.727525
CG10754	14.7132	10.9291	12.8446	11.0415	13.2595	12.8446	10.1898	14.2264	16.6683	13.7237	-0.143574	3.9491	1.29655	0.292992	0.882172
CG10761	0	0	0	0	0	0	0	0	0	0	0	-1.2705	0	1	1
CG10764	0.621683	0.20621	0.626564	0	0.464084	0.247012	0	0.346984	0	0.334725	0.663581	-0.560838	0.492287	0.484778	1
CG1077	0.207228	0	0	0.22083	0.331489	0.741036	0	0.173492	0.943488	0	-1.14505	-0.519662	1.70095	0.195596	0.769459
CG10777	184.433	230.543	226.19	180.197	193.788	189.705	197.973	204.374	211.341	186.442	0.0356065	7.35355	0.107601	0.743679	1
CG10778	18.236	16.2906	21.3032	19.2122	21.8119	20.6255	16.0125	16.6553	20.1277	19.7488	0.0351303	4.35681	0.0903151	0.764493	1
CG10793	0.207228	0	0	0.22083	0.397786	0	1.45569	0	0.314496	0.66945	-0.134877	-0.814787	0.0105786	0.918354	1
CG10795	12.4337	9.69186	10.025	15.0164	12.1988	13.4622	8.73411	14.0529	14.4668	11.3806	-0.12412	3.86211	0.777183	0.380428	0.927626
CG10799	43.3106	27.2197	43.2329	22.3038	53.1708	12.9681	18.9239	10.583	12.5798	20.4182	1.42546	5.33231	9.5475	0.00268712	0.124854
CG10801	0	0	0	0	0	0	0	0	0	0	0	-1.17312	0	1	1
CG10802	26.7324	30.7253	26.629	32.0203	30.2981	29.5179	34.9364	24.2889	32.0786	26.778	0.0264405	4.93304	0.0739327	0.786338	1
CG10803	51.3925	51.3463	50.4384	38.4244	45.215	48.0439	40.7592	46.6694	57.5528	46.192	-0.0344929	5.38595	0.0905426	0.764205	1
CG10804	93.0452	103.517	98.3706	100.257	102.563	113.626	135.379	123.006	124.54	116.15	-0.289641	6.64613	9.76812	0.0024121	0.119018
CG10809	14.5059	13.1974	20.6766	14.3539	18.7623	16.0558	20.3796	14.2264	19.4987	16.4015	-0.0409371	4.15883	0.103909	0.74796	1
CG10814	0.207228	0.20621	0.626564	0.662489	1.92263	0.247012	0	0.173492	0.314496	0.334725	1.71323	0.238209	2.37002	0.127673	0.727525
CG10822	0	0	0	0	0	0	0	0	0	0	0	-1.29814	0	1	1
CG10824	14.5059	12.3726	15.0375	13.029	14.5855	12.9681	8.73411	14.7468	4.71744	12.0501	0.307505	3.95397	2.04367	0.156415	0.727525
CG10827	0.207228	0	0	0	0.265191	0.247012	0	0.173492	0.314496	0	-0.398407	-0.389113	0.158131	0.691953	1
CG10830	257.998	276.115	294.799	273.829	259.025	269.243	310.061	283.139	323.931	304.934	-0.129143	7.93137	1.9173	0.169689	0.727525
CG10834	0	0	0	0	0	0	0	0	0	0	0	-1.25523	0	1	1
CG10839	0	0	0	0	0	0	0	0	0	0	0	-1.29797	0	1	1
CG10841	0	0	0	0.22083	0.0662977	0.494024	0	0	0	0	-1.18379	-1.03977	1.38449	0.242695	0.842581
CG10845	0	0	0	0	0	0	0	0	0	0	0	-1.29087	0	1	1
CG10853	0	0	0	0	0	0	0	0	0	0	0	-1.27038	0	1	1
CG10859	0	0	0	0	0.0662977	0.123506	0	0	0	0	-0.414491	-1.16224	0.131677	0.751481	1
CG10862	0	0	0	0	0	0	0	0	0.628992	0	-2.37352	-1.22587	3.9648	0.0534676	0.527728
CG10863	189.821	189.507	208.019	194.551	197.103	152.283	176.138	147.295	166.997	178.743	0.259598	7.43044	6.68193	0.0114016	0.270134
CG10864	2.48673	3.91799	2.81954	1.54581	2.51931	1.85259	2.91137	3.12286	3.77395	2.6778	-0.072351	1.66144	0.0750317	0.933628	1
CG10866	19.4794	16.703	17.8571	18.5497	16.3755	17.0438	18.9239	20.4721	23.9017	21.4224	-0.198528	4.27847	2.07086	0.153718	0.727525
CG10869	1.65782	1.03105	0.626564	0.883319	1.06076	1.35857	1.45569	1.73492	0.943488	1.67362	-0.419827	0.639035	0.798846	0.3739	0.919975
CG10874	30.048	24.539	26.9423	28.2662	29.4362	26.4303	21.8353	24.9829	25.7887	29.7905	0.0928796	4.74364	0.815352	0.369031	0.916651
CG10877	5.18069	2.47452	4.69923	5.74157	4.50824	2.96415	7.27843	6.41921	3.45945	5.3556	-0.07243	1.88279	0.0775864	0.992364	1
CG10880	6.83851	4.33041	4.69923	4.4166	5.10492	6.66933	1.45569	5.72524	6.28992	8.0334	-0.289533	2.7144	1.75228	0.189051	0.756418
CG10881	0	0	0	0.22083	0	0	0	0	0	0	1.21418	-1.24817	1.30788	0.32055	0.882172
CG10887	0	0	0	0	0	0.123506	0	0	0	0	-1.48974	-1.22075	2.48218	0.169634	0.727525
CG10889	2.90119	4.33041	3.75939	3.31245	5.7016	4.81674	7.27843	4.3373	2.20147	5.02087	-0.0833073	2.30129	0.122006	0.78312	1
CG10898	14.0915	15.8782	14.0977	19.433	16.707	15.0677	20.3796	20.2986	14.7813	17.071	-0.0915978	4.3067	0.639987	0.58483	1
CG10899	0	0	0	0	0	0.123506	0	0	0	0	-1.48992	-1.19973	2.197	0.169634	0.727525
CG1090	272.919	287.457	300.438	292.379	294.561	290.857	330.441	330.503	325.189	316.315	-0.136455	8.09805	1.83226	0.17936	0.742752
CG10903	7.87465	8.2484	9.08518	10.1582	9.21538	8.1514	4.36706	6.41921	8.49139	10.3765	0.169555	3.18555	0.981056	0.324679	0.887403
CG10904	10.1542	9.27944	13.4711	9.93734	8.81759	11.6096	8.73411	7.11318	9.43488	10.0417	0.0955685	3.38632	0.360142	0.995848	1
CG10907	12.4337	12.785	10.025	10.8207	9.21538	9.75698	13.1012	7.28667	14.1523	12.0501	0.028915	3.32963	0.0237211	0.877953	1
CG10909	0	0	0	0	0	0	0	0	0	0	0	-1.27631	0	1	1
CG1091	44.9684	43.3041	44.4861	45.0493	43.8891	47.6733	48.0376	39.3827	44.0294	37.8239	0.042868	5.39716	0.264804	0.673676	1
CG10910	0	0	0	0	0	0	0	0	0	0	0	-0.303139	0	1	1
CG10911	0	0	0	0	0	0	0	0.173492	0	0	-1.53994	1.63504	0.283919	0.596013	1
CG10912	0	0	0	0	0	0.247012	0	0	0.314496	0.334725	-3.11864	0.0356266	2.78184	0.0997326	0.669702
CG10914	8.70356	5.15525	8.45862	9.71651	7.69053	7.78088	4.36706	6.7662	9.43488	5.3556	0.148147	3.03025	0.765846	0.492546	1
CG10915	76.8815	79.8032	83.0198	91.6444	87.513	93.9881	74.2399	86.9196	83.3414	95.0619	-0.0645653	6.46061	0.647711	0.423122	0.967328
CG10916	19.6866	17.5278	17.8571	21.4205	17.6352	19.514	14.5569	19.2576	19.4987	17.4057	0.0186039	4.06629	0.02199	0.882456	1
CG10918	0.207228	0.41242	0.313282	0.22083	0.265191	0.123506	1.45569	0.173492	0.628992	0.334725	-0.202371	-0.246781	0.0533535	0.817869	1
CG10919	0	0	0.313282	0	0.132595	0.370518	0	0	0.314496	0	-0.867878	-0.87661	0.732958	0.394386	0.941768
CG1092	22.5878	22.8893	23.1829	18.108	24.5964	20.502	13.1012	12.6649	13.5233	18.0751	0.479742	4.15709	6.83473	0.0105319	0.260511
CG10920	0	0	0	0	0	0	0	0	0	0	0	-1.27055	0	1	1
CG10924	15.3348	16.703	15.0375	14.1331	17.0385	15.6853	13.1012	12.6649	26.1032	38.1586	-0.442899	4.60565	2.94233	0.0898385	0.64123
CG10927	2.90119	0.61863	2.50626	2.42913	2.05523	3.45817	2.91137	1.90841	2.83046	4.35142	-0.557083	1.4439	2.38387	0.126216	0.727525
CG10931	0	0.20621	0	0	0.0662977	0	0	0	0	0	1.76504	-1.22248	2.62384	0.160087	0.727525
CG10932	23.4167	20.4148	21.6165	19.433	26.3865	20.255	14.5569	15.4408	12.2653	10.3765	0.578893	4.52872	10.8052	0.00145993	0.0878429
CG10933	4.35178	2.88694	2.50626	2.87079	3.24859	3.33466	0	4.16381	4.08845	6.02505	-0.307078	1.86578	1.36798	0.245347	0.846592
CG10934	0	0.20621	0	0.22083	0.0662977	0	0	0.346984	0.314496	1.00417	-1.53735	-0.992387	2.79291	0.0988401	0.667497
CG10936	7.46019	4.74283	6.57893	6.84572	14.5192	4.81674	7.27843	13.8794	9.74937	24.4349	-0.513137	3.6398	4.41659	0.0384769	0.485063
CG10943	0	0.61863	0.939847	0	0.729275	0.123506	0	0	0	0.334725	2.01853	-0.918926	4.03347	0.0486291	0.522845
CG10947	70.8719	62.0692	67.0424	74.1988	67.69	70.2749	81.5184	72.6932	59.7542	83.6812	-0.0927299	5.89156	0.514519	0.475107	1
CG10948	89.1079	99.8056	95.2378	100.698	96.1317	92.3825	64.0501	93.6858	98.4372	84.6854	0.122975	6.39119	1.85131	0.177139	0.73872
CG10949	8.70356	10.7229	12.8446	14.3539	13.6573	16.1793	14.5569	9.71556	11.3219	13.389	-0.0918352	3.62542	0.245466	0.621532	1
CG10950	0.207228	0	0	0	0.0662977	0	0	0.173492	0.628992	0	-1.07391	-1.07618	0.96634	0.342294	0.898448
CG10953	0	0	0.313282	0	0	0	0	0	0	0	1.23515	-1.12979	0.918635	0.34272	0.898448
CG10958	9.32524	10.1043	10.9649	10.5998	11.2706	11.8566	7.27843	8.15413	7.8624	9.70702	0.164579	3.46654	0.923307	0.339266	0.896198
CG10959	4.14455	4.33041	4.38595	4.63743	3.84527	3.70518	2.91137	4.85778	4.71744	3.34725	0.0539729	2.2222	0.0403791	0.968636	1
CG10960	227.743	189.919	192.355	183.51	188.75	188.964	219.808	219.988	199.39	182.425	-0.0364877	7.48649	0.126303	0.723155	1
CG10962	2.2795	2.47452	2.19298	1.54581	3.97786	0.988048	0	0.346984	0.314496	0.66945	2.08111	1.60197	12.9386	0.000533204	0.0534139
CG10969	0	0	0	0	0	0.123506	0	0	0	0	-1.48929	-1.27012	2.36703	0.169634	0.727525
CG10970	0.207228	0	0	0.44166	0.331489	0.370518	1.45569	0.173492	0.314496	0	-0.339332	-0.434121	0.169872	0.765126	1
CG10973	19.0649	21.0334	19.7368	15.6789	14.5192	16.5498	23.291	16.3083	12.8943	13.0543	0.189386	4.05957	1.88996	0.2899	0.882172
CG10979	52.4286	54.4394	56.3908	55.6491	52.9719	58.5419	61.1388	49.6188	53.4643	57.5727	-0.0333402	5.66595	0.178384	0.673806	1
CG10984	62.1683	64.7499	67.669	64.4823	63.3143	65.9522	55.316	57.5994	77.0515	67.9491	-0.0218779	5.93901	0.0375272	0.846846	1
CG10993	0	0.20621	0	0	0.132595	0.123506	0	0.346984	0	0	-0.554892	-1.14461	0.347752	0.583336	1
CG10996	0	0.20621	0	0	0.0662977	0	0	0.173492	0	0	0.228288	-1.18168	0.0444216	0.840512	1
CG11000	179.045	202.911	185.15	198.084	202.407	216.506	219.808	236.47	239.646	241.337	-0.255006	7.70337	7.53548	0.00734594	0.21149
CG11007	12.0192	11.5478	13.7844	17.6664	14.8507	13.8327	30.5694	15.0938	15.0958	16.0668	-0.223591	4.07638	2.14247	0.3393	0.896198
CG11018	0	0	0	0	0	0	0	0	0	0	0	-1.30545	0	1	1
CG11023	0	0	0	0.44166	0.0662977	0.247012	0	0.173492	0	0	-0.400103	-0.982514	0.156389	0.693835	1
CG11029	0.207228	0.20621	1.87969	0.22083	0.464084	0.247012	0	0.693969	0.628992	0.66945	0.0677753	0.193556	0.00860322	0.926312	1
CG1103	15.1276	10.1043	14.0977	9.05402	13.1269	12.8446	13.1012	16.4818	10.0639	11.0459	-0.0604507	3.66931	0.102765	0.749303	1
CG11030	44.9684	61.0381	55.1377	44.8285	49.7896	58.7889	55.316	54.1296	53.7788	42.5101	-0.0503189	5.29467	0.177111	0.674904	1
CG11034	7.04574	3.91799	3.75939	5.29992	4.50824	4.32271	5.82274	4.68429	5.03193	3.34725	0.135173	2.48689	0.134592	0.714607	1
CG11035	17.4071	14.8471	12.5313	17.4456	13.5247	15.4383	8.73411	14.5733	15.7248	14.0584	0.0689229	3.93979	0.182479	0.94674	1
CG11037	0	0	0	0	0	0	0	0	0	0	0	-1.29789	0	1	1
CG1104	42.2744	48.2531	41.6665	52.3367	51.8448	52.2431	21.8353	40.2502	45.6019	40.167	0.172022	5.56914	2.19021	0.142495	0.727525
CG11041	1.65782	0.20621	0.626564	0.662489	1.39225	0.864542	1.45569	0.520477	1.25798	2.6778	-0.318667	0.775977	0.355906	0.552335	1
CG11043	0.621683	0.20621	0.626564	0	0.265191	0.247012	0	0.520477	0.943488	0	-0.269343	-0.236393	0.125157	0.724361	1
CG11044	16.7854	16.0844	11.2782	10.8207	14.8507	20.8725	11.6455	21.166	12.2653	13.389	-0.258397	4.44404	2.02994	0.157797	0.727525
CG1105	56.3659	47.4283	49.4986	47.6992	47.668	56.0717	53.8603	56.5585	38.054	44.1837	-0.000572514	5.52951	3.43015e-05	0.99534	1
CG11050	274.577	276.115	301.377	329.92	305.102	299.626	368.288	268.045	291.538	272.131	-0.00254746	7.80562	0.000794488	0.977578	1
CG11052	26.3179	27.2197	26.9423	25.1746	22.0108	25.3187	26.2023	25.8503	32.3931	22.4266	-0.0559743	3.9357	0.111801	0.738906	1
CG11060	0.207228	0	0	0	0.0662977	0.123506	0	0	0.314496	0	-0.506026	-0.778603	0.187805	0.66582	1
CG11068	0	0.41242	0	0.22083	0.397786	0.247012	1.45569	0.173492	0	0	0.303222	-0.660841	0.125808	0.723716	1
CG11069	10.3614	5.36146	6.26564	6.40406	7.95572	8.27491	10.1898	9.02159	5.03193	7.69867	-0.0937179	3.21854	0.305001	0.589589	1
CG11070	52.2214	43.9227	46.9923	46.8159	49.3918	45.8207	45.1262	43.8935	51.8918	46.8615	0.0347896	5.78004	0.225748	0.635883	1
CG11073	182.36	145.79	145.363	179.535	182.186	182.789	224.176	189.453	174.86	164.685	-0.151012	7.57056	2.38762	0.125922	0.727525
CG11076	66.5201	63.5126	69.5486	73.3155	68.5518	66.1992	61.1388	57.9464	82.0834	64.2672	0.0359533	6.03904	0.184156	0.668885	1
CG11077	25.6962	25.9824	28.822	25.6163	28.8395	25.4422	42.2149	29.3202	27.9901	20.0835	-0.0255489	5.00976	0.0342163	0.853677	1
CG11085	4.35178	4.74283	4.38595	3.75411	3.77897	3.70518	2.91137	4.68429	6.60441	4.35142	-0.140726	2.20716	0.341498	0.560475	1
CG11089	62.5827	31.9625	43.5462	39.5285	52.7067	26.8008	24.7466	32.2695	43.7149	50.5435	0.352985	6.63662	0.691094	0.408064	0.953707
CG1109	31.9131	32.1687	26.629	30.6953	33.1489	28.4064	39.3035	27.2383	26.7322	31.1294	0.0744687	4.91145	0.443182	0.507348	1
CG11095	11.3975	6.59872	11.2782	9.71651	10.6739	8.64542	8.73411	10.0625	14.1523	9.3723	-0.045752	3.71223	0.0791577	0.905292	1
CG11099	138.221	134.036	130.325	145.306	143.535	151.171	195.062	153.194	148.128	162.676	-0.213063	7.37259	8.25887	0.00509348	0.173502
CG11103	9.94693	8.2484	9.71175	8.1707	11.2706	11.3626	13.1012	9.19509	10.3784	11.7154	-0.178422	3.49898	1.32251	0.452469	0.997556
CG11106	0	0	0	0	0	0	0	0	0	0	0	-1.30545	0	1	1
CG11107	52.0141	48.8717	58.8971	58.9616	58.8061	60.8885	45.1262	57.2524	51.8918	58.5769	-0.00570034	5.84323	0.00601539	0.938357	1
CG11109	11.6047	9.89807	11.5914	11.9248	9.21538	13.2151	8.73411	7.80715	10.6929	9.3723	0.0658632	3.68931	0.204037	0.710862	1
CG11110	7.04574	8.2484	8.7719	7.28738	8.81759	9.01594	11.6455	6.24572	7.8624	6.35977	0.0550442	3.31522	0.114389	0.736015	1
CG11112	0	0	0	0	0	0	0	0	0	0	0	-1.27047	0	1	1
CG11113	0	0	0	0	0	0	0	0	0	0	0	-1.29816	0	1	1
CG11122	100.92	108.054	81.1401	105.115	110.916	110.538	110.632	113.117	86.1719	116.484	-0.0801662	6.83584	0.310868	0.578577	1
CG11123	17.1999	11.1353	10.025	15.4581	16.9059	15.0677	11.6455	13.7059	14.1523	14.3932	0.0255781	3.96146	0.0328507	0.856594	1
CG11125	6.21683	5.98009	6.89221	6.40406	5.7679	6.91634	1.45569	4.85778	6.91891	8.0334	-0.00359575	2.80898	0.000240909	0.987652	1
CG11127	16.1638	14.2285	16.2907	18.9914	19.9556	16.6733	26.2023	16.4818	15.4103	17.7404	-0.0161416	4.27053	0.0161541	0.899155	1
CG1113	3.52287	4.74283	6.57893	4.85826	5.7679	4.94024	4.36706	2.60238	4.40294	7.36395	0.12677	2.36141	0.272506	0.60298	1
CG11131	0.207228	0	0	0	0.132595	0.370518	0	0	0	0	-0.481137	-1.05894	0.2028	0.653766	1
CG11134	11.3975	8.2484	10.6516	7.06655	13.4584	7.16335	7.27843	5.72524	6.91891	8.36812	0.562537	3.26588	5.37382	0.0227824	0.378525
CG11137	62.79	54.6456	62.3432	51.0117	57.1486	58.7889	77.1513	60.3753	47.4889	55.5643	-0.0227479	5.98195	0.0377065	0.846485	1
CG11138	103.199	122.901	120.927	113.065	120.463	126.841	109.176	117.454	124.855	117.154	-0.0440764	6.67524	0.230363	0.632457	1
CG11141	26.5251	24.9514	21.9298	25.6163	28.0439	29.8885	32.0251	27.0648	26.7322	28.1169	-0.153103	4.77348	1.92161	0.170244	0.727525
CG11145	0	0	0	0	0	0	0	0	0	0	0	-1.27208	0	1	1
CG11147	126.202	114.034	104.323	104.673	109.458	106.956	93.1638	155.622	90.8893	101.422	0.00994612	6.67314	0.00805821	0.928678	1
CG11148	339.646	355.3	352.756	338.532	365.499	353.104	343.542	367.283	366.073	382.256	-0.050375	8.44178	0.792894	0.375677	0.921682
CG11149	0	0	0	0	0	0	0	0	0	0	0	-1.0655	0	1	1
CG11151	55.537	57.945	67.0424	63.1573	59.2701	52.9841	64.0501	58.8139	51.8918	59.2463	0.0920499	6.06074	0.834578	0.363472	0.911666
CG11155	655.047	684.204	655.7	606.84	618.889	618.395	727.843	820.618	683.085	668.111	-0.126942	9.20832	0.627872	0.430288	0.975358
CG11158	11.6047	10.1043	12.8446	11.704	16.9722	12.3506	8.73411	10.7565	8.49139	9.70702	0.309056	3.34803	2.93332	0.0903237	0.643142
CG11159	0.207228	1.23726	0	0.22083	0.198893	0.247012	0	0.867461	0	0	0.193662	-0.525429	0.0492586	0.824878	1
CG1116	28.8046	24.539	23.1829	22.9663	28.1102	29.3944	29.1137	30.8816	29.5626	28.1169	-0.200368	4.94012	3.62151	0.0603377	0.552639
CG11160	12.6409	8.86702	8.14534	7.72904	7.22645	9.01594	11.6455	12.3179	5.03193	9.03757	-0.0632242	3.23964	0.0638099	0.801167	1
CG11162	0	0	0	0	0	0	0	0	0	0	0	-1.23464	0	1	1
CG11164	2.90119	1.03105	0.313282	0.44166	1.25966	0.864542	1.45569	0.346984	1.25798	1.67362	0.319209	0.679388	0.221858	0.638804	1
CG11165	0	0	0	0	0	0	0	0	0	0	0	-1.29804	0	1	1
CG11168	31.0841	25.3638	30.3884	25.6163	27.5135	27.4183	24.7466	30.0141	25.7887	20.0835	0.107297	4.80266	1.27507	0.497183	1
CG11170	5.59515	3.29936	5.63908	1.76664	3.24859	3.33466	7.27843	2.77588	2.83046	3.34725	0.186264	2.29598	0.582831	0.447266	0.991836
CG11178	20.3083	20.8272	20.3633	21.6413	22.7401	23.4661	17.4682	22.554	21.7002	26.1085	-0.102828	4.46084	0.684209	0.4104	0.956361
CG11180	10.1542	9.07323	9.71175	9.71651	14.4529	9.38646	4.36706	8.15413	6.60441	8.70285	0.434816	3.25645	4.27697	0.0415957	0.502046
CG11190	33.1564	31.9625	34.7743	38.6452	35.8671	38.4104	32.0251	35.7394	39.941	38.8281	-0.102526	5.15463	1.56185	0.21474	0.799711
CG11191	26.3179	27.2197	30.0751	34.2286	31.4251	33.5936	33.4808	23.7684	31.4496	33.8072	-0.0466044	5.03348	0.0942116	0.759622	1
CG11192	0	0	0.313282	0	0	0	0	0	0	0	1.23721	-1.26967	1.34218	0.32055	0.882172
CG11200	32.9492	29.6942	28.5087	32.9036	26.718	27.6654	20.3796	30.3611	18.2408	23.7655	0.276206	4.73509	4.79056	0.0455094	0.518906
CG11208	31.7058	23.9203	21.9298	26.7204	29.9003	25.6893	36.3921	26.1973	18.8698	24.7696	0.0969493	4.95774	0.637584	0.426757	0.971602
CG11210	63.6189	63.7189	62.9697	60.949	63.7121	61.506	93.1638	71.9993	60.0687	62.5935	-0.108816	6.08668	1.13771	0.335446	0.892524
CG11211	222.355	134.861	126.879	153.035	163.623	203.785	231.454	247.4	183.037	173.053	-0.369019	7.53658	2.12527	0.14848	0.727525
CG11221	25.0745	33.6122	23.4962	26.9412	29.171	28.7769	36.3921	34.3515	29.2481	29.7905	-0.168295	4.6826	2.02661	0.158134	0.727525
CG11226	0	0	0.626564	0.44166	0.132595	0.123506	0	0	0	0	1.65962	-0.652961	1.96128	0.164925	0.727525
CG11227	0	0	0	0.22083	0	0	0	0	0	0	1.21425	-1.25466	1.11733	0.32055	0.882172
CG11231	0	0	0	0	0	0	0	0	0	0	0	-1.18828	0	1	1
CG11236	9.7397	13.1974	14.0977	7.28738	16.3755	3.21116	7.27843	4.16381	5.03193	3.01252	1.61745	3.56198	12.5494	0.000639247	0.054579
CG1124	162.466	176.928	196.115	159.439	180.396	166.486	144.113	249.482	124.226	144.266	0.0652886	7.18308	0.173102	0.678392	1
CG11241	31.9131	31.3439	29.4485	33.787	34.6737	29.8885	32.0251	25.3299	29.2481	24.4349	0.218446	4.75234	3.25017	0.0748716	0.607655
CG11247	80.6116	77.5349	93.3581	81.0445	82.8721	78.9204	72.7843	85.1847	88.6878	88.0326	-0.00633367	6.35644	0.00822522	0.927945	1
CG11248	36.4721	37.7364	31.3282	37.5411	42.099	40.263	43.6706	33.3105	41.828	38.4934	-0.0659822	5.34136	0.331541	0.778861	1
CG11249	0.414455	0	0.313282	0	0.0662977	0.123506	0	0	0	0	1.16143	-0.852113	1.04372	0.362573	0.911293
CG11251	0	0	0	0	0	0	0	0	0	0	0	-1.27043	0	1	1
CG11257	7.25297	7.01114	5.63908	4.4166	5.8342	5.68128	2.91137	5.72524	7.23341	4.68615	0.103325	2.90357	0.222816	0.651448	1
CG1126	1.24337	1.44347	1.87969	1.32498	0.928168	1.48207	0	1.90841	0.628992	1.00417	0.0664705	0.674592	0.0246709	0.875553	1
CG11261	7.87465	8.04219	4.69923	5.07909	4.90603	5.06375	5.82274	4.68429	4.40294	4.35142	0.357693	2.27929	1.82721	0.179954	0.743552
CG11262	0	0	0	0	0	0	0	0	0	0	0	-1.26261	0	1	1
CG11263	1.86505	0.82484	0.313282	0.883319	0.530382	1.11155	0	0.693969	0.628992	1.00417	0.0712685	0.312357	0.0132478	0.908631	1
CG11266	282.244	315.501	305.763	282.441	303.312	330.502	294.048	311.939	281.159	284.181	-0.0139453	8.19618	0.061785	0.804281	1
CG11267	59.6816	45.9848	55.4509	47.6992	58.2094	49.2789	43.6706	53.2621	60.6977	70.2922	-0.0708699	5.7783	0.37294	0.542995	1
CG11269	0	0	0	0	0	0	0	0.346984	0	0	-2.25906	-1.20639	3.8507	0.0568565	0.538222
CG11275	39.3733	32.5812	29.7618	34.0078	34.74	34.7052	42.2149	43.373	31.4496	35.1461	-0.112973	5.42651	1.3613	0.246495	0.848022
CG11279	10.7758	13.4036	14.411	13.2498	14.1877	12.1036	7.27843	13.0119	9.12038	11.0459	0.247206	3.80888	2.436	0.122202	0.722837
CG11284	54.9153	41.0358	51.6916	40.4119	49.7233	44.8327	43.6706	49.2718	42.7714	40.8364	0.0969685	5.44402	0.918111	0.340621	0.897821
CG11286	0	0	0	0	0	0	0	0	0	0	0	-1.27728	0	1	1
CG11289	0	0	0	0	0	0	0	0	0	0	0	-1.1019	0	1	1
CG1129	25.489	23.9203	31.3282	25.6163	23.6683	22.7251	23.291	22.901	25.1597	23.4307	0.138232	4.62812	1.90936	0.210306	0.793637
CG11291	0	0	0	0	0.0662977	0.123506	0	0	0	0	-0.414203	-1.06033	0.113189	0.751481	1
CG11294	8.70356	6.59872	7.51877	5.29992	6.76237	9.01594	8.73411	6.7662	7.8624	8.0334	-0.202424	2.80185	1.01063	0.317534	0.882172
CG11298	0	0	0	0	0	0	0	0	0	0	0	-1.30545	0	1	1
CG11300	0	0	0	0	0	0	0	0	0	0	0	-1.19243	0	1	1
CG11306	78.332	83.515	68.2955	84.5778	79.0269	77.8088	91.7082	85.8786	84.5994	75.9825	-0.0663162	6.46993	0.725381	0.431512	0.975859
CG11307	14.2987	12.5788	11.5914	9.71651	10.7402	12.9681	13.1012	11.7975	11.6363	14.3932	-0.112999	3.74506	0.621369	0.432677	0.976311
CG11309	47.0407	55.058	43.8595	40.4119	57.5464	40.3865	37.8478	41.8116	38.054	34.4767	0.340167	5.61505	5.24361	0.0244421	0.393876
CG11313	0.414455	0	0	0.22083	0	0.247012	0	0	0	0	0.0151358	2.22878	2.72281e-06	0.998689	1
CG11317	54.5009	54.4394	71.7416	53.4408	58.2094	68.7929	71.3286	56.2115	78.624	58.9116	-0.185484	6.09997	3.59188	0.0613766	0.554045
CG11318	0.414455	1.44347	1.56641	0.883319	0.994466	1.35857	0	2.2554	0.628992	0.66945	-0.231945	0.124643	0.200651	0.655307	1
CG11319	284.109	311.583	290.413	291.937	301.389	312.47	298.415	333.452	344.373	357.151	-0.156604	8.07234	2.16824	0.144489	0.727525
CG11320	0.621683	0.20621	0.313282	0.662489	0.265191	0.61753	0	0	0.314496	0	0.535935	-0.358179	0.356993	0.55173	1
CG11321	190.649	198.786	156.641	190.576	192.197	189.829	184.872	195.005	168.255	194.14	-0.00479991	7.46038	0.00169281	0.967275	1
CG11322	0.207228	0	0	0.662489	0.662977	0.247012	0	1.04095	0.628992	0.334725	-0.499407	-0.463695	0.423178	0.517066	1
CG11327	0.621683	0	0	0.22083	0.132595	0.247012	0	0.173492	0	0	0.449058	-0.96472	0.216151	0.727423	1
CG11329	0.414455	0.61863	0	0.22083	0.596679	0.494024	0	0.346984	0.628992	0	0.174014	0.0700426	0.0513793	0.821211	1
CG11333	0	0	0	0	0	0	0	0	0	0	0	-1.27627	0	1	1
CG11334	23.8312	19.1775	17.5438	22.3038	27.381	21.1195	18.9239	17.6962	15.0958	23.096	0.213762	4.52922	2.04424	0.156358	0.727525
CG11337	12.6409	12.785	11.9047	9.49568	12.5303	9.75698	11.6455	12.1445	9.12038	14.0584	0.0859508	3.69004	0.452489	0.502934	1
CG11340	0	0.20621	0	0.22083	0.132595	0.123506	0	0	0	1.00417	-0.683398	-0.902667	0.376879	0.541038	1
CG11342	3.52287	1.64968	1.87969	1.98747	2.18782	2.96415	2.91137	3.46984	2.51597	2.6778	-0.38141	1.46224	1.32735	0.252427	0.856881
CG11345	0.207228	0	0	0	0	0	0	0	0	0	1.20688	-0.937302	1.10618	0.32055	0.882172
CG11349	2.2795	1.64968	1.87969	3.75411	1.59114	0.494024	8.73411	1.73492	1.88698	2.00835	0.138123	0.689378	0.0797421	0.778384	1
CG11350	0	0	0	0.22083	0	0	0	0	0	0	1.21336	-1.17011	1.0735	0.32055	0.882172
CG11353	5.18069	20.8272	10.3383	12.3665	9.74576	9.01594	5.82274	13.0119	12.5798	11.3806	0.0940421	2.87002	0.0864678	0.769416	1
CG11356	0	0.41242	0	0.22083	0.132595	0.123506	0	0	0.314496	0	0.572365	-0.869465	0.27014	0.604555	1
CG11357	58.6454	54.2332	64.8494	55.2075	59.9994	56.1953	58.2274	64.1921	65.4151	61.9241	-0.0676388	5.7618	0.708417	0.402273	0.948924
CG1136	36.6793	32.7874	24.436	29.812	35.2704	32.1116	40.7592	51.8742	31.1351	41.8406	-0.300953	5.15406	4.09877	0.0459751	0.520378
CG11360	233.546	299.004	291.039	191.018	227.202	270.602	279.492	329.982	273.926	189.789	-0.11518	7.40139	0.320402	0.57282	1
CG11362	0	0.20621	0.626564	0.22083	0.0662977	0.123506	0	0.346984	0	0.334725	-0.115102	-1.01626	0.0201424	0.88752	1
CG11367	16.9927	12.3726	13.7844	13.4706	14.3203	9.63347	10.1898	12.6649	12.2653	17.7404	0.17599	3.82248	1.45217	0.231442	0.824563
CG11368	292.398	275.29	307.017	266.542	295.82	298.885	280.947	382.377	216.688	274.809	-0.0201153	8.26512	0.0150811	0.902544	1
CG11369	0	0	0	0	0	0	0	0	0	0	0	-1.27014	0	1	1
CG1137	0.207228	0.41242	0	0	0.132595	0	0	0.520477	0.314496	0	-0.295691	-0.632264	0.0964046	0.756929	1
CG11370	5.38792	0	1.25313	0.44166	0	4.19921	0	4.5108	0	0	-0.748707	0.294008	0.625014	0.431335	0.975859
CG11373	0	0	0	0	0	0	0	0	0	0	0	-1.29816	0	1	1
CG11374	4.35178	3.91799	4.69923	6.62489	5.03863	3.08765	2.91137	7.11318	5.66093	4.35142	0.023123	2.38155	0.00766891	0.930417	1
CG11377	28.5974	25.9824	27.8821	27.3829	24.3313	26.4303	16.0125	24.2889	28.6191	21.7571	0.133592	4.61025	1.29006	0.557187	1
CG11378	16.371	20.0024	18.4836	26.4996	22.276	16.9203	18.9239	17.0022	21.7002	24.4349	0.0858679	4.74913	0.505304	0.479076	1
CG11379	0.207228	0	0	0	0	0	0	0	0	0	1.20927	-1.24184	1.22299	0.32055	0.882172
CG1138	0	0	0	0	0	0	0	0	0	0	0	-1.291	0	1	1
CG11380	0.828911	0.41242	0.313282	0.662489	1.45855	0.741036	0	1.73492	1.88698	2.34307	-0.771339	1.05799	3.32495	0.172941	0.731796
CG11381	0	0	0	0	0.0662977	0	0	0	0	0	1.08561	-0.596603	1.01533	0.32055	0.882172
CG11382	0	0	0	0	0.132595	0	0	0	0	0.334725	0.0536484	-0.811252	0.00560633	0.940536	1
CG11384	0.207228	0	0	0	0	0.123506	0	0	0	0.334725	-1.06844	-1.16638	0.79072	0.378043	0.924358
CG11388	89.3151	80.8343	88.0323	92.086	88.0434	90.2829	117.91	96.2882	106.929	93.723	-0.186656	6.85171	5.88281	0.0173518	0.333572
CG1139	0	0	0	0	0.0662977	0.247012	0	0	0	0	-1.10352	-0.400082	0.79512	0.375011	0.921388
CG11391	0.414455	0.41242	0.313282	0.44166	0.331489	0.370518	0	0.693969	0.314496	10.7112	-2.5022	2.83244	1.61316	0.207428	0.789284
CG11395	64.655	69.2865	89.912	44.166	112.64	25.4422	21.8353	33.137	23.9017	32.803	1.44466	6.37588	12.3196	0.000711814	0.0579371
CG11396	26.7324	25.3638	26.629	30.2537	25.0605	25.5658	30.5694	21.6865	24.8452	25.4391	0.0989489	4.71742	0.838113	0.362462	0.911293
CG11398	7.66742	7.01114	7.83205	7.06655	8.28721	7.28686	8.73411	6.7662	4.71744	6.35977	0.211107	2.80146	1.37528	0.244102	0.845275
CG11399	76.0525	74.0293	64.5361	60.0657	68.817	79.9084	61.1388	75.8161	71.7051	73.3047	-0.094318	6.20105	1.10938	0.295126	0.882172
CG11400	33.1564	38.1488	38.5337	23.8496	53.6348	17.5379	11.6455	17.3492	20.1277	19.0793	1.08639	5.27972	14.1778	0.000301308	0.0387691
CG11403	2.48673	3.29936	2.19298	3.75411	3.58008	4.32271	4.36706	1.90841	3.45945	3.01252	-0.0697169	1.95935	0.0594843	0.895128	1
CG11404	0	0	0.626564	0.22083	0.132595	0.123506	0	0.346984	0	0.334725	-0.213259	-0.826314	0.0489836	0.825359	1
CG11406	1.86505	1.64968	1.56641	1.54581	1.92263	3.45817	1.45569	2.2554	1.88698	4.0167	-0.68211	1.26252	4.50775	0.036576	0.478348
CG11407	35.0215	25.9824	40.1001	29.3704	27.0495	29.0239	21.8353	35.9129	32.0786	39.8323	-0.0689147	5.66476	0.218601	0.641275	1
CG11409	1.45059	0.61863	1.87969	0.883319	2.32042	0.988048	2.91137	3.81683	3.77395	3.34725	-0.905174	1.38374	6.1493	0.0249797	0.395389
CG11412	41.86	48.0469	44.4861	46.5951	47.3366	46.0678	52.4047	38.5153	50.6338	49.2046	-0.0306005	5.46305	0.0603603	0.806505	1
CG11413	4.55901	2.47452	3.75939	6.40406	5.30382	3.58168	4.36706	6.93969	6.60441	7.36395	-0.345306	2.63717	1.35172	0.24815	0.850302
CG11414	46.6262	41.0358	41.9798	39.0869	51.9111	44.7092	36.3921	41.1177	41.828	38.4934	0.111125	5.71926	1.29603	0.258059	0.867301
CG11417	8.28911	6.80493	9.08518	6.40406	10.6076	10.004	1.45569	4.3373	9.74937	6.02505	0.230862	3.03368	0.466367	0.496474	1
CG11418	12.2264	10.5167	9.39847	11.9248	13.0606	11.1155	8.73411	14.3999	10.3784	10.7112	0.0071995	3.63914	0.00269154	0.958743	1
CG1142	15.7493	14.4347	18.4836	13.029	14.1214	14.0797	14.5569	10.0625	13.2088	12.3848	0.254109	3.68731	1.68373	0.197852	0.772339
CG11423	0	0.61863	0.313282	0	0.132595	0.123506	0	0.173492	0.628992	0	-0.025318	-0.497649	0.000748843	0.978234	1
CG11425	35.2287	18.9713	15.9774	18.3289	24.3976	23.0956	24.7466	26.5443	19.1843	27.7822	-0.0870576	4.94032	0.109636	0.741354	1
CG11426	1679.37	1520.39	1687.96	1994.76	1968.98	1831.47	2225.74	1624.23	2030.07	1920.65	-0.120688	11.0573	1.04848	0.308691	0.882172
CG1143	9.32524	5.15525	8.45862	5.74157	6.09939	6.29881	5.82274	7.80715	3.14496	8.0334	0.105868	3.29229	0.246677	0.833896	1
CG11436	9.94693	9.89807	7.20549	9.05402	9.34798	11.3626	7.27843	9.71556	7.23341	10.3765	-0.0675905	3.39024	0.233712	0.629997	1
CG11437	1.03614	1.03105	0.939847	1.32498	1.25966	1.48207	1.45569	1.21445	2.83046	1.3389	-0.510407	1.44443	1.64647	0.202841	0.780701
CG11438	7.66742	7.01114	5.3258	7.94987	8.88389	6.0518	7.27843	8.32763	8.49139	8.36812	-0.0179453	3.76074	0.00848756	0.926808	1
CG11444	38.9588	36.9116	44.4861	34.8911	41.3035	42.4861	29.1137	34.5249	42.1425	31.4641	0.0939466	5.25013	0.482922	0.48895	1
CG11447	9.94693	10.7229	8.14534	14.1331	10.6739	10.498	13.1012	11.971	11.0074	11.0459	-0.067184	3.43547	0.165623	0.711496	1
CG11448	247.43	251.164	251.252	263.671	259.423	286.287	282.403	270.995	310.093	282.173	-0.169891	8.02675	5.63789	0.0197711	0.357316
CG11449	0.621683	0.61863	0.313282	0.662489	1.32595	0.494024	0	0.520477	0.628992	1.3389	0.353373	1.57752	0.525018	0.470649	1
CG11453	0.621683	0.41242	0	0.883319	0.464084	0.988048	0	0.867461	0.943488	1.67362	-1.00507	0.899586	5.47818	0.0287618	0.426285
CG11454	12.4337	14.4347	15.9774	15.6789	14.9833	14.8207	10.1898	17.1757	16.6683	16.7362	-0.100565	3.96558	0.557105	0.457437	1
CG11455	131.175	113.209	141.917	128.744	126.96	107.944	171.771	120.924	123.911	125.187	0.0102818	6.98771	0.0107962	0.917484	1
CG11456	20.3083	20.0024	20.9899	17.4456	18.4308	22.2311	17.4682	20.6456	24.5307	22.7613	-0.18094	4.31193	2.13861	0.147228	0.727525
CG11458	82.2694	59.8009	70.4885	96.9443	229.191	41.3745	142.657	169.675	87.7444	195.145	-0.201689	7.21074	0.420076	0.518602	1
CG11459	1.45059	1.85589	4.07267	1.54581	3.97786	0.988048	0	1.04095	2.20147	0.66945	1.247	2.61929	1.02671	0.313736	0.882172
CG1146	65.6912	61.0381	60.7767	54.1033	57.8779	67.4343	59.6831	71.4788	53.7788	48.2004	-0.0165578	5.86716	0.0214757	0.883829	1
CG11470	0	0.20621	0	0	0.0662977	0	0	0	0	0	1.76531	-1.10541	2.30029	0.160087	0.727525
CG11474	40.6166	42.0668	39.7868	40.4119	38.4527	40.1395	43.6706	42.5056	43.0859	46.5268	-0.0967926	5.33623	1.05375	0.307485	0.882172
CG11475	1.03614	0.61863	2.81954	0.883319	1.52485	0.988048	0	1.38794	0.628992	1.67362	0.278995	1.17676	0.430066	0.513684	1
CG11486	259.035	279.621	257.205	230.546	268.174	279.865	283.859	279.322	260.403	244.349	-0.0561504	7.95774	0.540885	0.46404	1
CG11498	5.18069	2.88694	4.69923	3.97494	5.9005	6.29881	4.36706	4.85778	6.60441	5.02087	-0.275695	2.35922	1.56996	0.253193	0.857962
CG11504	18.0288	14.8471	18.7969	21.4205	21.4805	20.8725	20.3796	16.3083	25.1597	19.0793	-0.0909358	4.45027	0.268185	0.605864	1
CG11505	194.38	226.006	197.368	187.043	200.418	193.287	208.163	223.805	217.631	204.182	-0.0587442	7.5563	0.34895	0.556236	1
CG11509	12.4337	13.6099	14.411	12.8081	11.5358	10.6215	17.4682	11.4505	14.4668	18.4099	-0.102057	3.3523	0.275216	0.722948	1
CG11523	16.7854	12.785	12.5313	16.7831	14.6518	11.6096	11.6455	9.54207	14.4668	14.0584	0.277539	3.8403	3.15234	0.079308	0.622916
CG11526	74.8092	69.2865	60.1502	68.2364	69.7452	69.6574	75.6956	69.0499	65.7296	69.288	-0.018221	6.18239	0.0609956	0.917134	1
CG11529	7.25297	5.36146	1.56641	2.87079	2.9834	4.19921	1.45569	2.60238	1.88698	0.66945	0.694296	1.39749	3.35933	0.070239	0.591883
CG11534	17.6143	13.6099	11.2782	17.4456	17.6352	17.0438	16.0125	15.6143	13.2088	17.4057	-0.0168464	4.11005	0.0171665	0.89606	1
CG11537	343.583	337.978	331.453	363.486	358.405	362.984	413.415	381.336	388.088	405.017	-0.16656	8.3748	5.44872	0.021882	0.372351
CG11539	2.69396	3.09315	4.07267	4.4166	4.17676	3.58168	13.1012	3.81683	3.77395	3.68197	-0.237803	2.20742	1.05851	0.733862	1
CG11550	85.3778	74.0293	90.8518	89.6569	90.7616	67.1873	85.8854	105.483	54.4078	92.3841	0.0927085	6.09425	0.321337	0.572262	1
CG11555	13.8843	11.9602	14.7243	11.704	10.8728	9.50997	13.1012	8.32763	12.5798	7.36395	0.365444	3.35254	3.48691	0.0652167	0.568462
CG11560	11.3975	8.86702	11.5914	12.1456	12.0662	14.3267	8.73411	11.624	13.5233	13.0543	-0.182779	3.66985	1.58493	0.211413	0.795034
CG11562	9.94693	8.86702	9.39847	13.2498	12.2651	12.5976	5.82274	7.46016	15.7248	9.03757	0.020193	3.45799	0.0134536	0.907928	1
CG11563	11.1903	10.1043	11.5914	8.39153	12.5966	10.498	4.36706	11.277	8.80589	7.69867	0.218819	3.37861	1.11718	0.293447	0.882172
CG11566	0	0	0	0	0	0	0	0	0	0	0	-1.30545	0	1	1
CG11570	0	0	0	0	0.0662977	0	0	0	0	0	1.07488	-1.23573	1.4089	0.32055	0.882172
CG11576	47.6624	44.3351	41.6665	43.5035	44.8835	41.1275	36.3921	40.7707	45.6019	48.5351	0.0500122	5.55636	0.352915	0.554006	1
CG11577	35.6432	37.324	37.5939	39.3077	34.8063	35.9403	37.8478	28.7997	28.3046	37.1545	0.153546	4.94699	2.08321	0.152511	0.727525
CG11581	0	0	0	0	0	0	0	0	0	0	0	-1.30545	0	1	1
CG11583	11.1903	10.5167	7.83205	10.379	13.1932	11.4861	7.27843	6.7662	12.2653	6.02505	0.255783	3.45951	1.78264	0.185302	0.751231
CG11584	0	0	0	0	0.0662977	0	0	0	0	0	1.07481	-1.24103	0.693975	0.413319	0.958092
CG11585	0	0	0.313282	0.44166	0.86187	0.494024	1.45569	1.04095	0	0.66945	-0.638391	-0.465457	0.653999	0.420994	0.965314
CG11586	18.4433	18.5589	22.5563	20.758	22.0108	19.514	18.9239	14.7468	20.1277	17.4057	0.185357	4.39157	0.966602	0.32825	0.889978
CG11588	0	0	0	0	0	0	0	0	0	0	0	-1.30545	0	1	1
CG11590	7.46019	7.62977	9.08518	7.50821	9.87836	11.4861	10.1898	8.8481	10.3784	8.36812	-0.236152	3.29748	1.78038	0.185578	0.751231
CG11593	47.8696	39.7985	46.9923	44.3868	45.0161	49.2789	26.2023	43.1996	49.3759	38.1586	0.0610752	5.54131	0.600559	0.804986	1
CG11594	69.0068	41.8606	54.5111	37.3202	54.2315	21.8606	21.8353	22.0335	21.7002	33.8072	1.08263	5.86694	15.1604	0.000192946	0.0332723
CG11596	22.5878	21.4458	25.6891	23.1871	21.2153	22.6016	27.658	19.6046	18.5553	18.7446	0.12989	4.46541	1.07355	0.303011	0.882172
CG11597	6.42406	7.83598	8.45862	7.28738	6.03309	6.1753	8.73411	7.28667	7.23341	9.03757	-0.0649144	2.75985	0.0962885	0.757071	1
CG11598	0	0	0	0	0	0.123506	0	0	0	0	-1.49005	-1.18425	2.10682	0.169634	0.727525
CG11600	0	0	0	0	0	0	0	0	0	0	0	-1.25488	0	1	1
CG11601	25.2818	23.0955	20.6766	23.408	26.3202	24.8247	23.291	22.901	22.6437	17.4057	0.10259	4.69927	0.629843	0.429568	0.974553
CG11608	0	0	0	0	0	0	0	0	0	0	0	-1.30545	0	1	1
CG1161	73.9803	70.73	69.8619	74.6405	77.1042	72.004	81.5184	72.1728	82.0834	77.6562	-0.0623144	6.3586	0.534675	0.968565	1
CG11617	11.1903	9.89807	12.218	12.1456	11.4032	9.63347	14.5569	11.277	11.3219	12.7195	-0.00911543	3.28775	0.00276694	0.95817	1
CG11619	8.91079	8.66081	7.20549	9.27485	10.6076	9.38646	14.5569	8.50112	11.9508	9.03757	-0.144352	3.33613	0.628962	0.899295	1
CG11626	1.45059	1.03105	0.939847	1.54581	1.19336	0.864542	2.91137	1.73492	0.314496	1.67362	-0.00965743	1.49975	0.00068996	0.979104	1
CG11629	0	0	0	0	0	0	0	0	0	0	0	-1.30545	0	1	1
CG11630	0	0	0	0	0.0662977	0.123506	0	0.173492	0	0	-1.14177	-1.16048	1.10963	0.332285	0.889978
CG11634	0	0	0	0	0	0	0	0	0	0	0	-1.29804	0	1	1
CG11635	0	0.41242	0.313282	0	0	0	1.45569	0.346984	0	0	-0.467926	-0.540043	0.154941	0.694818	1
CG11638	60.9249	67.8431	62.6564	70.2239	65.038	68.0518	90.2525	67.315	88.0589	77.3214	-0.236914	5.76561	3.72902	0.0567244	0.53819
CG11652	17.1999	15.4657	11.5914	18.7705	14.1214	17.4144	14.5569	18.9106	11.3219	15.3973	-0.0399907	4.45438	0.115483	0.734804	1
CG11655	23.8312	14.4347	22.8696	20.758	22.2097	21.243	17.4682	20.1251	19.1843	19.0793	0.0759378	4.53852	0.359032	0.550598	1
CG11656	0	0	0	0.662489	0	0	0	0	0	0	2.38132	-1.16532	2.74905	0.102987	0.678484
CG11658	94.2886	81.2467	79.5737	92.5277	87.8445	87.8128	119.366	101.146	94.9778	94.3924	-0.171103	6.61518	5.06727	0.0268967	0.410687
CG11659	0	0	0	0	0	0	0	0	0	0	0	-1.2632	0	1	1
CG11663	0	0	0	0	0	0	0	0	0	0	0	-1.30545	0	1	1
CG11664	0	0	0	0	0	0	0	0	0	0	0	-1.30545	0	1	1
CG11665	139.879	119.602	122.807	110.194	116.618	117.084	100.442	133.936	121.395	110.459	0.0485343	6.74813	0.18406	0.668965	1
CG11666	0	0	0	0	0	0	0	0	0	0	0	-1.2982	0	1	1
CG11668	6.21683	8.45461	4.38595	6.40406	7.35905	7.03984	4.36706	6.41921	4.40294	6.35977	0.144817	3.18321	0.48275	0.489027	1
CG11670	0	0	0	0	0	0	0	0	0	0	0	-1.26917	0	1	1
CG11671	0	0	0	0	0	0	0	0	0	0	0	-0.943543	0	1	1
CG11672	0	0	0	0	0	0	0	0	0	0	0	-0.344313	0	1	1
CG11674	2.90119	0.82484	0.939847	0.44166	2.7845	0.494024	0	0.173492	0.943488	0.334725	1.93774	1.647	6.94793	0.00993256	0.251624
CG11679	4.76624	3.09315	5.3258	5.52075	5.50271	6.29881	13.1012	5.89873	3.77395	4.68615	-0.266347	2.81822	1.50137	0.234825	0.82879
CG11686	21.3444	19.3837	24.436	19.2122	22.6738	24.5777	23.291	26.3708	11.6363	18.0751	0.0345707	4.32082	0.0323649	0.857647	1
CG11693	0	0	0.313282	0.22083	0.132595	0.123506	0	0.173492	0	0.334725	-0.197618	-0.640104	0.037429	0.847215	1
CG11694	0	0	0	0	0	0	0	0	0	0	0	-1.30545	0	1	1
CG11695	13.4698	12.785	13.4711	15.6789	15.9777	18.8964	13.1012	12.8384	16.6683	17.4057	-0.167493	4.18668	0.923049	0.339333	0.896198
CG11696	12.0192	10.3105	11.2782	17.8872	13.2595	12.3506	10.1898	10.93	10.0639	13.389	0.167294	3.85042	1.32109	0.25354	0.858301
CG11697	0	0	0	0	0	0	0	0	0.314496	0	-1.59734	-1.28335	2.41678	0.169634	0.727525
CG11698	0	0	0	0	0	0	0	0	0	0	0	-1.25524	0	1	1
CG11699	27.5613	21.4458	26.3157	27.8246	28.9058	28.1594	36.3921	22.0335	29.8771	32.803	-0.125034	4.8116	1.08627	0.747257	1
CG11700	1.86505	2.26831	1.87969	1.98747	0.729275	1.35857	0	1.04095	2.51597	1.00417	0.269129	1.37136	0.413131	0.845244	1
CG11703	0	0	0	0	0	0	0	0	0	0	0	-1.30545	0	1	1
CG11710	22.1734	23.3017	19.1102	20.3163	20.8175	19.3904	17.4682	20.6456	20.1277	23.4307	0.0484557	4.49104	0.178433	0.673764	1
CG11714	0	0.20621	0	0	0.265191	0.123506	0	0	0	0.334725	0.386151	-0.707026	0.161835	0.688457	1
CG1172	28.3902	34.6433	34.461	27.8246	28.508	29.5179	26.2023	28.7997	32.0786	24.7696	0.101166	4.90677	0.897653	0.52068	1
CG11722	13.0553	15.0533	10.9649	17.2247	14.1877	11.8566	26.2023	16.3083	16.0393	13.7237	-0.125338	3.93336	0.709298	0.831355	1
CG11723	17.6143	20.0024	22.5563	18.7705	16.9722	17.6614	17.4682	21.513	19.1843	23.096	-0.0706592	4.32976	0.395468	0.531084	1
CG11726	0	0	0	0	0	0	0	0	0	0	0	-1.28351	0	1	1
CG11737	40.4094	29.9004	35.4009	31.7995	34.8063	32.3586	39.3035	38.8623	37.1105	36.1503	-0.0793438	5.17339	0.469021	0.49763	1
CG11739	79.161	68.0493	79.5737	68.0156	89.8997	58.0478	55.316	51.7007	66.6731	63.263	0.382843	6.45832	5.97376	0.0165346	0.331226
CG11741	7.25297	6.39251	9.08518	4.4166	8.95019	3.82869	1.45569	2.2554	2.83046	2.00835	1.39909	1.97037	6.11571	0.015339	0.317017
CG11752	65.2767	49.078	49.1853	60.7282	62.9828	60.3945	104.809	60.0283	54.0933	69.288	-0.208884	6.17695	2.24918	0.137298	0.727525
CG11753	17.6143	14.6409	16.604	22.9663	20.486	22.2311	24.7466	21.86	18.2408	19.7488	-0.181099	4.51148	1.59314	0.210244	0.793637
CG11755	6.42406	6.39251	6.26564	5.9624	7.02756	7.90439	5.82274	7.11318	6.91891	8.70285	-0.214451	2.65281	1.15396	0.285685	0.882172
CG11756	0	0	0	0	0.0662977	0	0	0	0	0	1.07479	-1.24246	1.32675	0.32055	0.882172
CG11760	0.414455	0.41242	0	1.32498	0.265191	0.494024	0	0.693969	0.943488	1.00417	-0.552647	0.43335	0.971798	0.32696	0.889584
CG11762	0	0	0	0	0	0.123506	0	0	0	0	-1.48955	-1.24226	2.376	0.169634	0.727525
CG11768	0.207228	0	1.25313	0	0.132595	0.123506	0	0.173492	0.314496	0	0.682297	-0.798798	0.420129	0.518576	1
CG11771	68.7996	54.2332	61.09	69.1197	58.4083	58.7889	53.8603	55.691	61.3267	61.9241	0.0864906	5.98614	1.43024	0.254461	0.860375
CG11777	4.35178	3.71178	8.14534	3.97494	6.16569	4.56972	5.82274	4.85778	7.8624	4.68615	-0.044413	2.55969	0.0402195	0.841519	1
CG11779	44.1395	48.8717	52.0048	62.7157	53.2371	45.5737	55.316	50.1392	46.8599	43.5142	0.132023	5.66048	2.40154	0.124839	0.727525
CG11781	11.1903	9.27944	12.218	9.05402	11.2706	8.89244	8.73411	10.93	9.74937	9.70702	0.124352	3.50468	0.535544	0.466248	1
CG11786	0	0.20621	0.313282	0	0.132595	0	0	0.173492	0.314496	0	0.236752	-1.10953	0.0629778	0.802616	1
CG11788	2.90119	3.29936	4.07267	4.19577	5.10492	4.94024	4.36706	3.81683	5.66093	5.69032	-0.292987	2.24569	1.44425	0.360093	0.911293
CG11790	56.1587	47.4283	46.0525	51.4533	52.11	47.9203	59.6831	47.3634	52.2063	46.192	0.0276854	5.63097	0.0879131	0.767552	1
CG11791	133.869	112.178	133.771	112.402	110.982	120.912	110.632	141.223	113.533	117.488	-0.0124142	6.82548	0.016638	0.897664	1
CG11796	80.4043	51.7587	62.0299	68.0156	76.7727	41.498	55.316	95.7677	51.8918	136.233	-0.181136	6.19024	0.559564	0.456449	1
CG11802	20.7228	21.0334	21.9298	24.2913	25.5246	20.996	30.5694	15.0938	29.5626	26.778	-0.0412919	4.67915	0.105191	0.746463	1
CG11807	39.3733	39.1799	44.1728	42.1785	40.0438	42.8566	65.5058	44.2405	45.6019	41.5059	-0.174749	5.39831	3.51896	0.0640172	0.563724
CG11808	4.14455	4.1242	5.95236	3.75411	3.71267	4.32271	5.82274	3.12286	5.03193	3.01252	0.0817318	2.03587	0.0784078	0.851226	1
CG11811	26.1107	28.457	28.822	25.3954	25.9887	27.6654	27.658	25.6768	33.0221	27.1127	-0.0680515	4.7097	0.407844	0.52474	1
CG11815	0	0	0	0	0	0	0	0	0	0	0	-1.30545	0	1	1
CG11816	0	0	0	0.22083	0.0662977	0	0	0	0	0	1.77037	-0.889266	1.93178	0.168273	0.727525
CG11825	1.86505	1.23726	1.87969	1.76664	1.39225	1.23506	1.45569	2.94937	3.45945	2.6778	-0.585557	1.12931	2.25737	0.136593	0.727525
CG11828	0.621683	0	0.313282	0.662489	0.198893	0.247012	2.91137	1.21445	0.314496	0	-0.849391	-0.255339	1.48948	0.225589	0.814338
CG11835	19.2722	14.2285	14.7243	17.4456	21.7456	22.1076	18.9239	22.901	22.3292	18.4099	-0.263641	4.29585	1.96679	0.16434	0.727525
CG11836	4.35178	6.59872	4.38595	6.40406	4.97233	6.1753	1.45569	5.55175	4.71744	2.6778	0.188349	2.09792	0.437552	0.817553	1
CG11837	4.14455	5.56767	5.01252	6.18323	6.36458	4.81674	4.36706	4.3373	5.03193	3.34725	0.31822	2.53133	2.17734	0.14366	0.727525
CG11839	4.35178	5.15525	4.69923	3.75411	4.83973	4.81674	2.91137	3.81683	4.71744	4.68615	0.062885	2.27813	0.074879	0.785008	1
CG11841	26.1107	27.8383	29.1352	26.4996	31.624	20.6255	10.1898	14.5733	16.6683	17.4057	0.754393	4.62547	8.30393	0.00497952	0.171737
CG11842	22.795	9.89807	13.1579	7.28738	21.0164	6.91634	1.45569	3.29635	4.40294	4.35142	1.68021	4.35199	10.881	0.00140777	0.0858864
CG11843	0.621683	0.82484	0.626564	1.54581	1.06076	0.741036	1.45569	0.693969	0.943488	0	0.494593	0.564365	0.801688	0.373055	0.919975
CG11851	15.9565	12.9912	8.45862	9.71651	12.5303	10.3745	10.1898	10.4095	8.17689	8.36812	0.337852	3.68715	2.70125	0.103871	0.680216
CG11852	3.52287	5.15525	5.63908	6.84572	7.22645	6.66933	2.91137	6.24572	3.14496	6.35977	0.0605829	2.79312	0.0546974	0.815631	1
CG11854	1.03614	1.03105	1.87969	1.10415	0.795572	0.61753	0	0.693969	0	1.3389	0.819904	0.270091	2.08924	0.151925	0.727525
CG11857	77.9176	79.597	83.9596	74.4196	81.281	79.2909	74.2399	92.9918	81.1399	65.9408	0.00275323	6.43884	0.00134548	0.970823	1
CG11858	10.7758	8.86702	6.89221	6.18323	8.6187	6.66933	7.27843	5.20477	5.97542	5.3556	0.485001	3.01654	5.01381	0.0276914	0.416917
CG11864	0	0	0	0	0	0	0	0	0	0	0	-1.30545	0	1	1
CG11865	0	0	0	0.22083	0	0	0	0	0	0	1.21445	-1.27661	1.22027	0.32055	0.882172
CG11873	167.647	184.558	166.979	169.597	172.507	185.877	167.404	193.617	186.496	213.554	-0.1429	7.52608	1.84213	0.178206	0.740951
CG11876	232.095	183.321	195.175	266.983	258.893	232.685	323.162	233.52	214.801	271.462	-0.151499	8.14185	2.26824	0.135665	0.727525
CG11878	0.207228	0.20621	0.313282	0.22083	0.132595	0	0	0.173492	0	0	1.5866	-0.355931	1.5888	0.210862	0.793852
CG11880	70.4574	51.3463	71.1151	67.1323	69.7452	58.9124	75.6956	71.1318	58.4962	73.9742	-0.0196355	6.04937	0.0576123	0.810874	1
CG11882	3.7301	2.26831	2.19298	1.54581	2.12153	3.08765	1.45569	3.46984	2.51597	2.00835	-0.239272	2.328	0.97524	0.32611	0.8887
CG11883	95.1175	99.8056	96.1776	102.465	105.082	109.55	109.176	114.331	111.332	120.501	-0.180842	6.83847	6.47512	0.0127	0.285913
CG11885	8.28911	5.98009	4.07267	7.06655	5.6353	5.55777	2.91137	6.07223	6.60441	3.68197	0.221415	2.50323	0.914974	0.358442	0.911055
CG11889	0	0	0	0	0	0	0	0	0	0	0	-1.29058	0	1	1
CG11891	0	0	0	0	0	0	0	0	0	0	0	-1.30545	0	1	1
CG11892	1.86505	2.26831	2.19298	2.42913	1.92263	1.72908	1.45569	1.90841	2.51597	1.3389	0.198988	1.34934	0.22307	0.637891	1
CG11893	0	0	0	0.22083	0	0	0	0	0	0	1.167	1.96362	1.51871	0.32055	0.882172
CG11897	48.284	50.7276	55.7642	44.166	53.1708	41.745	37.8478	47.3634	49.6904	45.5226	0.163826	5.56421	1.58987	0.210709	0.793698
CG11898	0	0	0	0.22083	0.0662977	0.123506	0	0	0	0.334725	-0.506394	-0.935074	0.1957	0.659421	1
CG11899	36.6793	38.5612	44.1728	36.2161	51.1155	29.6415	18.9239	31.2286	28.3046	49.2046	0.349384	5.8856	1.80841	0.182187	0.746557
CG11902	31.7058	30.1066	29.7618	32.9036	30.8947	33.9642	43.6706	27.7588	37.7395	28.4516	-0.0962554	4.96367	0.844288	0.419357	0.96464
CG11905	0.414455	0.41242	0	0	0.662977	0	0	0.346984	0.628992	0.334725	0.452359	-0.457943	0.280337	0.597826	1
CG11906	9.94693	9.07323	11.9047	11.704	13.3258	12.8446	27.658	8.67461	12.2653	13.7237	-0.218958	3.77375	2.03942	0.688627	1
CG11911	0	0	0	0	0.132595	0	0	0	0	0	1.70973	0.885354	1.11621	0.296116	0.882172
CG11912	0	0	0	0	0	0	0	0	0	0	0	-0.879899	0	1	1
CG11913	0	0.41242	0.626564	0.44166	0.198893	0.247012	0	0.173492	0	0.334725	0.608796	-0.568715	0.446401	0.539351	1
CG11920	7.04574	7.62977	5.63908	7.06655	8.6187	7.65738	2.91137	6.41921	4.08845	4.35142	0.365514	3.05901	3.2857	0.0733281	0.602062
CG11927	14.7132	11.1353	13.4711	9.49568	14.1214	11.1155	8.73411	14.3999	13.8378	18.7446	-0.124208	3.83168	0.849048	0.685852	1
CG11929	0	0	0	0	0.0662977	0	0	0	0	0	1.0745	-1.26525	1.35304	0.32055	0.882172
CG11951	15.5421	16.2906	15.6641	10.5998	14.6518	11.1155	8.73411	12.8384	9.12038	15.0626	0.309493	3.97554	2.21333	0.140432	0.727525
CG11961	32.3275	30.1066	36.654	32.9036	32.1544	30.1355	30.5694	35.9129	28.6191	30.7947	0.0621967	5.13933	0.371699	0.614698	1
CG11964	19.2722	16.0844	17.5438	19.6539	20.8838	22.4781	21.8353	17.8697	19.4987	15.0626	-0.0303766	4.34834	0.0264362	0.871216	1
CG11966	0.207228	0.20621	0	0.22083	0	0	0	0.520477	0	0	-0.362909	-1.14771	0.142951	0.706632	1
CG11970	38.9588	38.9737	31.6415	40.6327	39.9112	44.8327	40.7592	34.178	36.796	48.2004	-0.100449	5.37971	1.03893	0.31089	0.882172
CG11975	37.7154	30.7253	34.1478	30.0329	34.6737	29.3944	43.6706	32.79	28.6191	25.1044	0.127112	5.09765	1.26098	0.264549	0.87765
CG11977	0	0	0	0	0	0	0	0.173492	0	0	-1.53683	-1.19954	2.24187	0.169634	0.727525
CG11980	26.1107	19.7961	22.243	24.7329	23.8009	23.9602	18.9239	24.8094	21.3857	20.0835	0.0639767	4.61669	0.243035	0.741546	1
CG11982	38.1299	36.7054	42.6064	41.9577	43.8891	39.2749	48.0376	38.1683	42.1425	44.8531	-0.0373207	5.52815	0.15292	0.696715	1
CG11983	3.10841	2.47452	3.4461	2.87079	2.7845	3.82869	2.91137	2.94937	2.83046	3.34725	-0.162526	2.05235	0.371279	0.543893	1
CG11984	166.611	144.966	139.724	158.777	168.529	176.243	158.67	138.273	155.99	163.011	-0.0234462	7.45499	0.0394079	0.843105	1
CG11985	12.2264	11.3415	10.6516	12.5873	12.7292	13.3387	11.6455	10.236	12.8943	11.3806	0.00315468	3.54583	0.000403167	0.984026	1
CG11986	7.87465	7.21735	7.20549	5.9624	6.23198	5.06375	5.82274	6.7662	5.03193	8.70285	0.132386	2.66241	0.455919	0.501325	1
CG11997	1.03614	1.64968	0.313282	1.10415	1.52485	1.35857	1.45569	1.21445	3.45945	1.3389	-0.542242	0.440799	1.19645	0.303941	0.882172
CG11999	12.8481	14.2285	10.9649	15.8997	16.5081	15.1912	5.82274	12.6649	12.8943	11.7154	0.174722	4.02638	1.1825	0.279845	0.882172
CG12003	0	0	0	0	0	0	0	0	0	0	0	-1.29152	0	1	1
CG12004	145.267	150.121	147.869	146.631	149.965	158.829	167.404	175.401	156.619	156.651	-0.13795	7.28193	3.0378	0.0848724	0.628587
CG12006	44.3467	40.0047	40.7267	42.841	39.4471	43.5976	43.6706	42.3321	38.3685	35.8156	0.028171	5.69449	0.121347	0.796109	1
CG12007	26.9396	26.6011	28.1954	22.3038	24.1324	23.9602	7.27843	20.1251	24.2162	18.4099	0.324629	4.60522	9.0524	0.010474	0.260511
CG12009	0	0	0	0	0.132595	0.123506	0	0	0	0	0.158065	-1.05345	0.0248487	0.875191	1
CG12010	6.42406	4.74283	6.57893	5.29992	4.83973	4.44622	7.27843	6.93969	5.97542	6.35977	-0.117166	2.68208	0.251279	0.61744	1
CG12011	0.207228	0.20621	0.313282	0	0.662977	0.370518	0	0.520477	0.314496	0	0.0783401	0.134776	0.00673663	0.934774	1
CG12012	24.8673	30.3129	31.3282	24.7329	28.4417	25.3187	26.2023	31.5756	25.1597	23.7655	0.0717975	4.7813	0.364395	0.547643	1
CG12014	6.21683	7.21735	5.3258	6.84572	7.35905	5.80478	5.82274	5.72524	7.8624	5.69032	0.116391	3.22013	0.450725	0.503766	1
CG12016	0	0.41242	0.939847	0	0.265191	0.123506	0	0.693969	0.628992	0	-0.226841	-0.632519	0.0588109	0.808955	1
CG12017	0.207228	0.41242	0.313282	0	0.331489	0.247012	0	1.21445	0.628992	2.00835	-1.65281	-0.546845	4.43361	0.0384075	0.485063
CG12018	6.42406	3.91799	3.13282	4.19577	4.30935	4.56972	5.82274	4.16381	7.23341	5.3556	-0.240016	2.45828	0.853077	0.358233	0.91102
CG12020	0	0	0.313282	0	0	0	0	0	0	0	1.23726	-1.2834	1.20385	0.32055	0.882172
CG12024	71.908	58.5636	62.0299	67.3531	72.3308	66.3227	78.607	63.6716	72.6486	60.5852	-0.0192185	6.15795	0.0659323	0.797959	1
CG12025	185.469	218.376	228.383	199.63	201.678	188.1	200.885	232.48	207.567	205.856	-0.00422299	7.52963	0.00210502	0.96351	1
CG12027	0	0	0	0	0	0	0	0	0	0	0	-1.13404	0	1	1
CG12034	23.8312	19.1775	16.9172	21.1997	22.6738	18.1554	17.4682	26.7178	14.7813	16.7362	0.123976	4.59472	0.937846	0.335512	0.892524
CG12035	0	0	0	0	0	0	0	0	0	0	0	-1.29805	0	1	1
CG12038	30.8769	33.6122	28.5087	38.866	30.8284	38.5339	40.7592	28.1057	42.1425	34.4767	-0.15645	5.18618	2.17969	0.143446	0.727525
CG12042	19.2722	21.652	21.3032	27.3829	25.392	27.6654	23.291	22.7275	25.4742	28.7863	-0.159989	4.81574	2.56359	0.120928	0.721252
CG12050	22.3806	16.4968	20.0501	19.2122	22.6738	20.8725	24.7466	20.6456	15.4103	19.7488	0.0303669	4.27887	0.0453366	0.831883	1
CG12054	149.826	169.298	151.002	147.514	159.247	154.012	180.505	161.868	192.786	160.668	-0.123374	7.22641	2.5949	0.110823	0.697946
CG12056	15.7493	16.2906	14.7243	16.7831	16.3092	18.1554	16.0125	13.0119	11.6363	14.7279	0.123892	4.09513	0.989892	0.38101	0.928524
CG12057	0	0	0	0	0.0662977	0	0	0	0.943488	0	-1.72009	0.826683	1.74216	0.191346	0.761332
CG12061	0.207228	0	0	0	0	0	0	0.346984	0	0	-1.05044	-1.18131	0.950244	0.334629	0.891894
CG12065	68.5923	63.1002	62.6564	77.0696	68.6844	66.4463	74.2399	64.8861	59.1252	65.6061	0.0573777	5.94661	0.340796	0.560878	1
CG12069	0	0	0	0	0.0662977	0	0	0	0	0	1.07441	-1.27714	1.37394	0.32055	0.882172
CG12071	96.5681	104.136	102.13	105.998	107.933	110.414	110.632	94.7267	117.621	109.79	-0.0679329	6.67601	0.234996	0.629059	1
CG12075	41.0311	49.4904	57.6439	55.8699	48.8614	52.8606	43.6706	55.5175	48.7469	49.5393	-0.00994429	5.55366	0.00929594	0.923412	1
CG12078	0	0	0	0	0	0	0	0	0.314496	0	-1.59731	-1.26954	2.50372	0.169634	0.727525
CG1208	28.3902	19.3837	20.9899	27.6037	25.5246	22.7251	37.8478	24.8094	27.0466	32.1336	-0.177345	4.38812	0.827383	0.365538	0.914425
CG12081	19.4794	18.3527	19.1102	21.1997	22.7401	18.1554	27.658	22.7275	22.0147	24.7696	-0.136238	4.6548	1.69683	0.840654	1
CG12082	31.9131	26.8073	26.629	34.6703	32.7511	31.9881	24.7466	23.248	26.1032	25.7738	0.200295	4.90229	2.32115	0.131245	0.727525
CG12084	90.7657	71.761	83.3331	103.79	86.85	91.271	94.6195	94.7267	92.4618	97.7397	-0.107853	6.57966	2.12841	0.148185	0.727525
CG12090	130.968	137.542	145.363	139.564	148.706	154.259	110.632	142.784	131.774	136.902	0.038277	7.43769	0.237061	0.797279	1
CG12091	172.621	164.555	166.04	180.197	178.076	164.51	161.581	162.215	170.457	172.049	0.0515392	7.60576	0.532885	0.467354	1
CG12093	27.9757	23.5079	23.1829	24.9538	25.9887	25.3187	29.1137	21.86	24.5307	25.1044	0.0306415	4.87401	0.0911004	0.763502	1
CG12096	20.3083	20.621	22.5563	18.108	20.3534	19.514	17.4682	19.6046	18.2408	21.0877	0.0690191	4.37147	0.317598	0.574502	1
CG12099	177.18	199.611	194.862	193.668	196.374	191.558	151.391	176.095	182.722	180.417	0.115073	7.60514	2.68219	0.105081	0.682597
CG12104	13.0553	13.6099	14.0977	13.4706	16.5744	15.6853	5.82274	14.2264	15.7248	13.7237	0.0193737	3.83348	0.0135712	0.907528	1
CG12105	2.07228	2.68073	3.75939	4.63743	4.24305	5.18725	2.91137	3.81683	1.57248	4.68615	-0.137292	2.40244	0.20986	0.648017	1
CG12106	10.5686	9.27944	10.3383	11.9248	11.5358	10.745	21.8353	11.7975	13.2088	14.0584	-0.283959	3.63862	3.75586	0.18432	0.749603
CG12107	28.183	21.0334	26.0024	22.9663	26.1876	25.6893	27.658	22.0335	18.5553	25.4391	0.0845845	4.79313	0.484403	0.488286	1
CG12111	0.207228	0.41242	0.313282	0	0.132595	0.123506	0	0	0	0.334725	0.852919	-0.877672	0.631519	0.428957	0.974092
CG12112	9.94693	7.21735	10.025	7.94987	7.22645	8.27491	7.27843	6.41921	6.28992	4.68615	0.332484	2.83742	2.14265	0.152096	0.727525
CG12115	0.207228	0	0	0	0.331489	0	0	0.173492	0.314496	0	0.52792	-1.07378	0.289024	0.592735	1
CG12116	101.749	135.067	196.115	101.803	223.423	97.6933	55.316	45.455	55.0368	75.3131	1.1821	7.16738	10.9045	0.00139206	0.0855909
CG12118	37.7154	26.6011	34.461	33.1245	34.4748	38.0399	46.5819	36.6069	33.9656	34.4767	-0.155509	5.38536	2.04751	0.15603	0.727525
CG12119	62.3755	16.9092	15.0375	17.0039	14.3866	36.6813	21.8353	35.9129	21.0712	29.1211	-0.272028	5.13091	0.536853	0.465706	1
CG12121	85.1706	96.5062	95.5511	85.682	86.5848	90.5299	84.4297	89.3485	86.1719	90.041	0.0228366	6.51305	0.123174	0.806902	1
CG12123	10.9831	9.07323	8.7719	11.9248	10.475	10.498	7.27843	9.71556	8.80589	11.7154	0.0495285	3.39824	0.114817	0.750115	1
CG12125	22.795	28.0445	27.8821	25.1746	28.8395	26.8008	33.4808	27.4118	34.909	22.4266	-0.096525	4.73819	0.719623	0.689805	1
CG12126	0	0	0	0	0	0	0	0	0	0	0	-1.30545	0	1	1
CG12128	18.0288	18.3527	19.4235	16.7831	17.8341	18.7729	11.6455	18.0432	22.6437	18.0751	-0.0419735	4.20619	0.100941	0.751463	1
CG12129	16.1638	17.1154	21.6165	15.6789	15.2485	13.4622	23.291	13.8794	16.9828	14.0584	0.153258	3.95387	0.93429	0.336425	0.893707
CG1213	224.22	177.134	189.849	202.28	209.501	162.781	184.872	225.366	133.346	170.375	0.196166	7.52475	1.96942	0.164061	0.727525
CG12133	0	0	0	0	0	0	0	0	0	0	0	-1.2276	0	1	1
CG12134	4.55901	4.53662	5.95236	9.27485	6.76237	6.1753	4.36706	4.68429	4.71744	2.34307	0.422522	2.53503	2.73038	0.102054	0.675792
CG12147	0	0	0	0	0.0662977	0	0	0	0	0	1.07462	-1.25635	1.36377	0.32055	0.882172
CG12155	22.795	24.7452	23.8094	26.4996	27.7124	29.765	24.7466	27.5853	28.9336	27.1127	-0.151367	4.85911	2.20345	0.141309	0.727525
CG12158	305.039	337.772	365.6	286.195	330.361	325.315	176.138	284.354	194.987	280.834	0.348024	8.07607	5.19557	0.0250864	0.395868
CG12159	20.3083	21.4458	22.243	18.108	23.2705	17.6614	11.6455	18.2167	19.8132	18.7446	0.238909	4.49437	4.25424	0.0421285	0.504079
CG12162	44.7612	36.0867	34.1478	48.1409	48.2647	45.4502	39.3035	46.8429	49.3759	36.1503	-0.0477207	5.67106	0.229623	0.842292	1
CG12163	263.179	258.381	293.545	274.271	312.527	252.199	197.973	230.398	235.872	255.73	0.250754	8.00131	7.24593	0.00851914	0.227999
CG12164	0.414455	0.20621	0	0	0.0662977	0	0	0.173492	0	0	1.06286	0.686846	0.89047	0.362573	0.911293
CG12170	22.5878	16.2906	20.6766	25.6163	22.4749	18.8964	30.5694	19.0841	15.4103	20.7529	0.131577	4.5868	1.17201	0.281974	0.882172
CG12171	15.9565	15.0533	11.2782	14.7956	16.5081	16.3028	21.8353	13.5324	15.7248	9.03757	0.0345107	4.07034	0.0432196	0.835797	1
CG12173	14.5059	15.2595	14.0977	18.9914	14.3866	13.7092	17.4682	11.624	11.6363	12.3848	0.265895	3.91887	3.50427	0.064564	0.565721
CG12177	21.3444	25.3638	23.1829	25.3954	26.6517	24.3307	40.7592	24.9829	22.6437	22.7613	-0.0578051	4.71396	0.178512	0.677618	1
CG12179	5.80237	5.56767	4.07267	5.9624	6.89496	7.78088	4.36706	3.99032	8.80589	5.69032	-0.135182	2.80912	0.381427	0.627832	1
CG1218	12.8481	9.07323	5.63908	8.83319	6.89496	10.8685	7.27843	7.63366	6.60441	7.02922	0.0797653	3.17584	0.133733	0.715478	1
CG12182	13.0553	17.1154	11.9047	17.6664	13.9225	12.4741	16.0125	16.6553	16.6683	12.7195	0.00386982	3.89928	0.000854976	0.97674	1
CG12184	0	0.20621	0.313282	0.22083	0.0662977	0	0	0	0	0	2.65783	-0.887792	4.91568	0.0469604	0.521467
CG12194	81.4405	76.7101	67.0424	81.9279	80.1539	90.6534	110.632	95.4207	90.8893	95.7313	-0.302099	6.65929	9.9055	0.00225573	0.115741
CG12200	1.03614	0	0	0.22083	0.795572	0	0	0.173492	0	0	2.75791	-1.01058	7.75765	0.00694354	0.205203
CG12203	110.452	81.2467	93.0448	115.052	110.054	113.502	133.923	97.5026	107.872	119.162	-0.147183	6.92512	1.72871	0.192024	0.762674
CG12204	3.10841	5.36146	4.38595	2.42913	4.77343	5.06375	4.36706	2.77588	2.83046	7.02922	-0.102957	2.22231	0.0895204	0.7655	1
CG12206	0.621683	0.61863	0.313282	0.44166	0.928168	0.741036	0	1.21445	0.943488	1.00417	-0.482546	0.60611	0.886292	0.40661	0.953033
CG12207	98.8476	86.4019	99.3105	90.9819	91.1593	92.506	104.809	111.729	107.243	92.3841	-0.122459	6.58759	3.82161	0.0537999	0.527743
CG12209	0	0.20621	0.313282	0	0	0.123506	0	0.173492	0	0	-0.30624	-0.951016	0.0983372	0.754583	1
CG12213	78.332	83.9274	83.3331	83.2528	87.1815	89.0479	82.974	74.6016	87.7444	91.3799	-0.0335561	6.2462	0.156425	0.844308	1
CG12219	13.677	12.9912	15.9774	15.2373	14.7181	16.5498	14.5569	12.4914	12.8943	13.389	0.0490098	3.94798	0.101648	0.877795	1
CG12224	7.04574	8.66081	6.89221	7.50821	10.0773	4.44622	8.73411	7.46016	8.49139	4.35142	0.375275	2.92525	1.81	0.181997	0.746446
CG12229	0	0	0	0	0.0662977	0	0	0	0.314496	0.334725	-1.29659	-0.941001	1.04058	0.332285	0.889978
CG12231	0	0	0	0	0.0662977	0	0	0	0	0	1.07522	-1.20714	0.964836	0.331999	0.889978
CG12236	41.86	50.3152	37.9071	49.245	48.6625	51.502	37.8478	46.4959	50.3193	40.8364	-0.0161962	5.47183	0.0241254	0.876925	1
CG12237	57.6093	50.3152	49.1853	66.2489	62.2535	67.0638	74.2399	53.2621	60.3832	59.581	-0.112116	6.13705	2.15276	0.29079	0.882172
CG12239	357.26	433.866	437.655	512.988	439.421	524.654	327.529	275.506	506.967	441.167	0.0652402	8.52481	0.0508195	0.822171	1
CG12241	30.8769	31.7563	24.7493	35.9953	30.4969	32.2351	42.2149	30.8816	31.1351	35.4808	-0.115692	5.08259	1.5337	0.328605	0.889978
CG12253	10.7758	10.3105	13.4711	12.1456	12.0662	14.6972	11.6455	11.1035	14.4668	9.03757	-0.0785574	3.61126	0.238111	0.626799	1
CG12256	4.14455	5.15525	3.13282	3.53328	1.65744	2.71713	0	2.2554	2.51597	3.01252	0.467351	2.02262	1.40749	0.238696	0.835984
CG12259	7.04574	7.83598	10.9649	7.50821	7.95572	8.02789	4.36706	3.99032	9.12038	7.36395	0.258913	2.91993	1.24107	0.268328	0.881618
CG12262	113.146	113.003	123.12	102.244	148.838	79.0439	80.0627	101.666	70.4471	82.677	0.533138	6.99319	6.66921	0.0114773	0.271159
CG12263	23.4167	25.57	22.243	25.8371	24.9942	29.765	23.291	28.4527	25.4742	27.7822	-0.167786	4.85497	1.94932	0.166206	0.727525
CG12264	58.4382	51.9649	63.283	63.8198	52.9056	47.0558	55.316	51.8742	44.6584	60.9199	0.168816	5.68563	3.40972	0.0682068	0.582089
CG12267	7.25297	7.01114	9.08518	7.72904	7.02756	6.42231	5.82274	5.89873	9.12038	8.36812	0.0738298	2.90103	0.145334	0.703963	1
CG12268	6.63128	5.36146	6.57893	6.62489	6.29828	5.31076	1.45569	6.07223	4.08845	9.03757	0.13937	2.78874	0.304427	0.582532	1
CG12269	65.0695	68.8741	85.2128	75.5238	59.0713	52.9841	43.6706	51.7007	58.8107	57.5727	0.390375	6.07295	7.50338	0.00746724	0.213148
CG1227	10.3614	8.66081	10.9649	8.39153	11.6684	10.251	14.5569	9.54207	11.3219	7.02922	0.0117059	3.45997	0.00379471	0.951021	1
CG12272	40.4094	33.8184	33.2079	36.6577	32.7511	31.494	39.3035	35.2189	36.4815	31.4641	0.0448796	5.18319	0.222282	0.638484	1
CG12278	0.621683	0.41242	0.313282	0.44166	0.265191	0.123506	0	0.867461	0.314496	0.66945	-0.170463	-0.556099	0.0523658	0.819533	1
CG12279	12.4337	11.1353	10.9649	9.71651	9.81206	11.1155	11.6455	10.7565	8.80589	10.7112	0.0323229	3.44521	0.0474075	0.894408	1
CG12288	1.86505	3.09315	3.4461	2.87079	2.25412	2.22311	1.45569	0.693969	1.57248	1.3389	0.8193	1.28117	3.39844	0.0686559	0.584345
CG12289	0	0	0	0	0	0	0	0	0	0	0	-1.30545	0	1	1
CG12290	43.3106	45.9848	50.1252	46.3743	49.4581	52.6136	46.5819	54.997	47.4889	58.9116	-0.161329	5.57521	2.17267	0.144085	0.727525
CG12299	38.1299	32.1687	37.2806	42.1785	38.7179	42.7331	55.316	34.0045	42.7714	35.1461	-0.106771	5.3565	0.703644	0.403856	0.950989
CG12301	9.32524	9.27944	8.7719	9.05402	11.0717	6.54582	8.73411	5.55175	6.60441	3.68197	0.699892	3.22453	7.67356	0.00684706	0.202709
CG12304	34.3998	24.7452	28.5087	28.487	31.6903	32.8526	30.5694	29.3202	31.4496	25.1044	-0.0124461	4.98934	0.0163421	0.915421	1
CG12307	0	0	0	0	0	0	0	0	0	0	0	-1.28329	0	1	1
CG12309	0	0	0	0	0	0.123506	0	0	0.314496	0	-2.27247	-1.24038	4.34115	0.0521063	0.522845
CG1231	6.0096	6.59872	7.83205	6.18323	6.23198	6.79283	4.36706	6.7662	8.80589	5.69032	-0.0606961	2.81691	0.0960902	0.757313	1
CG12310	0	0	0	0	0	0	0	0	0.628992	0	-2.33707	0.284939	0.610667	0.438801	0.983891
CG12316	32.1203	38.7675	34.7743	34.0078	34.4748	31.3705	33.4808	26.1973	28.9336	30.46	0.230369	4.98621	2.42712	0.122875	0.724493
CG12320	7.25297	5.15525	5.95236	5.07909	6.29828	7.90439	7.27843	5.37826	5.97542	6.35977	-0.128348	2.91774	0.439096	0.509307	1
CG12321	13.677	11.1353	13.1579	14.7956	16.1766	13.8327	5.82274	15.9613	10.3784	14.7279	0.0816344	3.71864	0.25207	0.616887	1
CG12325	15.3348	13.6099	15.6641	13.6914	15.6463	15.6853	8.73411	11.7975	10.3784	10.3765	0.300334	3.76814	4.23125	0.0426748	0.507231
CG1233	35.4359	34.6433	36.654	37.3202	39.8449	37.2988	34.9364	32.9635	33.9656	35.8156	0.0733703	5.3005	0.739914	0.392048	0.939042
CG12333	37.301	47.8407	38.2204	46.8159	47.668	50.02	48.0376	41.9851	48.4324	41.8406	-0.0703214	5.87062	0.50604	0.531444	1
CG12338	31.7058	42.273	45.1126	35.5536	55.0934	32.8526	21.8353	26.8913	31.1351	25.7738	0.565003	5.39873	10.5739	0.00163172	0.0941163
CG1234	15.3348	15.0533	9.71175	11.2623	16.5081	11.7331	5.82274	13.1854	11.3219	15.3973	0.173528	3.8029	1.05414	0.307397	0.882172
CG12341	15.5421	14.4347	17.5438	15.8997	16.6407	14.4502	16.0125	19.4311	22.0147	18.7446	-0.187021	4.18665	2.03584	0.183432	0.74919
CG12343	20.5155	18.1465	20.0501	19.2122	19.4915	20.255	10.1898	18.3902	18.5553	15.7321	0.143188	4.38142	1.06427	0.428945	0.974092
CG12344	24.6601	14.6409	20.6766	17.2247	14.7181	16.4263	29.1137	18.2167	14.4668	16.0668	0.0506869	4.04125	0.0547939	0.815471	1
CG12347	0	0	0.313282	0	0	0	0	0	0	0	1.23726	-1.28385	1.26044	0.32055	0.882172
CG12355	58.231	51.9649	64.8494	56.5324	53.1045	56.8128	64.0501	66.4475	59.1252	58.2421	-0.0962915	5.65567	0.415233	0.521017	1
CG1236	13.2626	12.9912	13.1579	13.6914	16.1766	14.4502	11.6455	15.6143	13.2088	9.70702	0.0712857	4.02841	0.248725	0.61923	1
CG12360	75.4309	81.2467	81.1401	82.1487	79.8887	79.9084	96.0752	82.0618	83.9704	74.9784	-0.0444519	6.27453	0.450228	0.665739	1
CG12362	0	0	0	0.44166	0.132595	0.370518	0	0	0	0	-0.0909498	-0.819014	0.0105483	0.918433	1
CG12374	0.207228	0.41242	1.25313	0.22083	0.265191	0	0	0	0	0	3.99438	4.01347	0.704451	0.403953	0.950989
CG12375	22.5878	22.4769	20.3633	22.7455	26.4528	23.4661	26.2023	24.9829	27.9901	16.0668	-0.0268017	4.63608	0.0468916	0.829069	1
CG12376	0	0	0	0	0	0	0	0	0	0	0	-1.24852	0	1	1
CG12379	2.90119	1.85589	2.81954	1.54581	3.31489	2.22311	1.45569	2.60238	3.14496	5.69032	-0.286156	1.65678	0.938525	0.665744	1
CG12384	51.8069	50.3152	54.1978	51.0117	58.6735	49.5259	59.6831	60.7223	50.0048	53.556	-0.0255638	5.91714	0.0574008	0.811215	1
CG1239	4.97346	5.98009	3.13282	6.18323	6.62977	4.94024	0	4.16381	5.03193	4.35142	0.354386	2.56457	1.7807	0.185538	0.751231
CG12391	33.1564	27.2197	31.6415	29.3704	32.8837	28.6534	32.0251	18.9106	31.4496	32.4683	0.139069	4.84019	0.400324	0.528578	1
CG12393	26.1107	24.1266	25.6891	28.2662	29.4362	27.1713	39.3035	22.7275	25.4742	28.7863	-0.027739	4.82486	0.0447688	0.832924	1
CG12395	0	0	0	0	0	0	0	0	0	0	0	-1.26917	0	1	1
CG12398	0	0	0	0	0.0662977	0.123506	0	0	0	0	-0.414337	-1.11011	0.121181	0.751481	1
CG12400	121.643	102.074	116.228	130.069	122.452	102.51	119.366	109.474	110.388	122.509	0.0781898	6.91478	0.525929	0.470266	1
CG12402	32.9492	38.1488	35.7142	37.5411	37.856	41.1275	53.8603	39.3827	51.2628	38.8281	-0.266293	5.11907	6.07345	0.0156851	0.320918
CG12404	26.9396	27.6321	34.1478	28.9287	30.2318	31	24.7466	34.178	31.7641	27.7822	-0.0517625	5.08198	0.250884	0.617716	1
CG12413	7.87465	10.7229	9.39847	13.6914	9.08279	9.13945	18.9239	7.28667	10.0639	8.36812	0.0916689	3.39891	0.234391	0.629501	1
CG12420	0	0	0.626564	0.22083	0.198893	0.123506	0	0.346984	0	0.334725	-0.042472	-0.346332	0.00299177	0.956505	1
CG12426	0	0	0	0	0.0662977	0	0	0.173492	0	0	-0.460201	-1.05818	0.127232	0.751481	1
CG12428	15.5421	19.3837	19.7368	19.2122	21.3479	17.2908	18.9239	17.5227	18.8698	21.7571	0.0320407	4.87943	0.0263431	0.871441	1
CG12438	0	0	0	0	0	0	0	0	0	0	0	-1.26934	0	1	1
CG12439	0	0	0	0	0	0	0	0	0	0	0	-1.29814	0	1	1
CG12446	0	0	0.313282	0	0	0	0	0	0	0	1.23686	-1.2484	1.26916	0.32055	0.882172
CG12448	0.207228	0.41242	0.313282	0	0.198893	0.123506	0	0.173492	0.314496	0.334725	0.11949	-0.851837	0.0162096	0.898997	1
CG1246	1.03614	0.41242	0.313282	0	0.464084	0.370518	0	0.693969	0	0.66945	0.0994073	0.163108	0.0143545	0.904909	1
CG12464	0	0	0	0	0	0	0	0	0	0	0	-1.30545	0	1	1
CG12470	1.45059	1.85589	1.25313	1.32498	1.45855	1.35857	0	2.08191	0.628992	1.00417	0.230413	0.646943	0.284931	0.706342	1
CG12477	0	0	0	0	0	0	0	0	0.314496	0	-1.59686	-1.22648	2.41786	0.169634	0.727525
CG12479	0	0	0	0	0	0.123506	0	0	0	0	-1.48927	-1.29133	2.72559	0.169634	0.727525
CG12480	0	0	0	0	0	0	0	0.173492	0	0	-1.53687	-1.16784	2.16484	0.169634	0.727525
CG12481	0	0	0	0	0	0	0	0	0	0	0	-1.30545	0	1	1
CG12483	3.93733	1.23726	1.87969	0.883319	1.06076	1.72908	2.91137	3.46984	0.628992	1.67362	-0.228484	1.29718	0.268208	0.605848	1
CG12484	123.508	113.003	135.338	125.873	127.292	133.51	141.201	144.692	133.661	143.262	-0.155135	6.98961	4.60652	0.0346291	0.463051
CG12490	0	0	0	0	0	0	0	0.173492	0	0	-1.53695	-1.07803	1.68024	0.202476	0.780293
CG12491	0	0	0	0	0	0	0	0	0	0	0	-1.30545	0	1	1
CG12493	0.207228	0.41242	0	0.22083	0.0662977	0	1.45569	0.346984	0	0.334725	-0.317767	-0.747851	0.0849141	0.771437	1
CG12496	0	0	0	0	0	0	0	0	0	0	0	-1.24806	0	1	1
CG12498	0	0	0	0	0	0.123506	0	0	0	0	-1.48962	-1.23493	2.0715	0.169634	0.727525
CG12499	21.1372	16.0844	15.6641	16.5622	21.4805	16.4263	21.8353	16.4818	14.4668	15.3973	0.171652	4.27434	0.848218	0.359599	0.911293
CG12502	93.8741	96.3	110.589	108.427	101.303	108.685	100.442	105.136	117.936	106.443	-0.0841174	6.75538	1.18474	0.279393	0.882172
CG12506	0	0	0	0	0	0	0	0	0	0	0	1.63259	0	1	1
CG12507	0.621683	0.20621	0.626564	0.662489	0.464084	0.247012	0	0.693969	0.628992	1.67362	-0.425172	-0.593637	0.380179	0.539114	1
CG12511	0	0	0	0	0	0	0	0	0	0	0	-1.28365	0	1	1
CG12512	55.3298	39.3861	37.2806	45.4909	50.9829	55.4542	50.949	52.0477	50.0048	46.5268	-0.155426	5.51549	1.79173	0.184196	0.749603
CG12516	0	0	0	0	0	0	0	0.173492	0	0	-1.53675	-1.29089	2.59564	0.169634	0.727525
CG12517	0	0	0	0	0	0	0	0	0	0	0	-1.00964	0	1	1
CG12519	0	0	0.313282	0	0.0662977	0.123506	0	0	0	0	0.301321	-1.17899	0.0567571	0.840512	1
CG12520	1.24337	0.82484	0.939847	1.10415	0.86187	0.988048	1.45569	2.08191	0.943488	1.3389	-0.456684	0.379263	0.952972	0.331665	0.889978
CG12521	0	0	0	0.22083	0	0	0	0	0	0.334725	-0.387773	-1.0586	0.107449	0.751481	1
CG12522	1.45059	1.23726	0.313282	1.32498	0.662977	0.864542	0	0.867461	0.314496	1.00417	0.418689	-0.083964	0.386021	0.536634	1
CG12523	0.207228	0	0	0	0	0	0	0	0	0	1.2092	-1.23487	1.18928	0.32055	0.882172
CG12531	198.939	233.636	208.333	203.826	216.528	244.912	222.72	262.667	267.007	253.387	-0.24171	7.96295	4.74951	0.0320034	0.447597
CG12535	0	0.20621	0	0.22083	0.0662977	0.370518	0	0.173492	0	0.334725	-1.07113	-0.84726	1.25389	0.266034	0.880137
CG12538	0	0	0	0	0	0	0	0	0	0	0	-1.29828	0	1	1
CG12539	0.207228	0	0	0	0.132595	0.123506	0	0.346984	0	0.334725	-0.964126	-1.06429	0.754514	0.388144	0.933901
CG12540	0	0	0	0	0.0662977	0	0	0	0	0	1.0747	-1.2495	0.998722	0.325314	0.88795
CG12541	42.0672	48.8717	38.5337	41.2952	34.2096	35.3227	34.9364	42.8526	47.1744	35.4808	0.0484805	5.32239	0.149702	0.878872	1
CG12546	0	0	0	0	0	0	0	0	0	0	0	-1.30545	0	1	1
CG12547	137.599	148.884	150.689	127.419	120.463	131.41	154.303	151.632	135.548	117.154	-0.00486177	6.85636	0.00133411	0.970947	1
CG12560	13.8843	8.45461	12.5313	12.3665	12.0662	10.745	2.91137	14.0529	9.74937	11.3806	0.125645	3.60512	0.419238	0.573293	1
CG12567	104.65	110.941	105.889	89.4361	91.6897	92.6295	106.265	124.394	106.614	89.0368	-0.047017	6.30905	0.0930671	0.761041	1
CG12576	102.163	108.673	112.155	104.673	103.093	114.49	107.721	124.914	94.6633	106.443	-0.052314	6.89955	0.430177	0.51363	1
CG12581	102.163	96.0938	101.817	106.661	112.308	101.151	110.632	131.507	90.5748	90.041	-0.0107372	6.76455	0.0169219	0.965656	1
CG12582	77.9176	66.3996	62.6564	67.7948	71.0711	59.6534	64.0501	57.2524	50.6338	56.9032	0.275757	6.11199	9.12157	0.00331394	0.137998
CG12589	0	0	0	0	0.132595	0	0	0	0.314496	0	0.0502944	-1.18775	0.00783999	0.92979	1
CG12590	1.24337	1.03105	1.25313	1.54581	0.928168	0.864542	0	1.73492	0.628992	1.00417	0.191642	0.528099	0.150414	0.8743	1
CG12592	0	0	0	0	0	0	0	0	0	0	0	-0.938341	0	1	1
CG12594	48.4913	51.1401	41.9798	52.7783	45.4139	54.2192	64.0501	46.6694	59.7542	47.1962	-0.155614	5.55105	3.90021	0.0514446	0.522845
CG12605	204.948	234.667	214.598	181.522	209.567	229.104	171.771	226.581	222.034	225.605	-0.0518763	7.54733	0.236334	0.628087	1
CG12607	0	0	0	0	0	0	0	0.173492	0	0	-1.5369	-1.13745	1.88886	0.174888	0.735571
CG12608	19.8939	21.8582	21.6165	25.1746	21.2816	24.5777	26.2023	20.4721	20.1277	25.1044	-0.0649733	4.39446	0.194572	0.660231	1
CG12609	0	0	0	0	0	0	0	0	0	0	0	-1.173	0	1	1
CG12617	0	0	0	0	0	0	0	0	0	0	0	-0.984795	0	1	1
CG12620	0	0	0	0	0	0	0	0	0	0	0	-1.29802	0	1	1
CG12637	0	0	0	0	0.0662977	0.123506	0	0	0	0	-0.414859	-1.27062	0.158591	0.751481	1
CG12640	0	0.20621	0	0	0.331489	0.123506	1.45569	0	0	0.334725	-0.0314662	-1.0568	1.26265e-05	0.997174	1
CG12643	7.87465	5.15525	10.025	4.63743	6.69607	5.18725	7.27843	4.85778	4.71744	6.6945	0.315618	2.72142	1.04976	0.308396	0.882172
CG12645	0.207228	0.20621	0.313282	0	0	0.247012	0	0	0	0	0.21552	-1.09544	0.0242806	0.961378	1
CG1265	38.1299	27.0135	22.243	36.2161	30.6295	36.3108	43.6706	44.2405	30.8206	34.4767	-0.273886	5.26507	4.32967	0.0403879	0.493116
CG12655	5.59515	4.94904	4.07267	3.97494	6.09939	5.31076	5.82274	6.5927	2.51597	3.34725	0.0888272	3.01251	0.125148	0.724371	1
CG12659	2.90119	3.29936	2.81954	3.53328	1.85634	3.58168	1.45569	3.12286	2.83046	1.67362	-0.00495176	1.68953	0.000339541	0.985341	1
CG12661	0	0	0	0	0	0	0	0	0	0.334725	-1.60225	-1.27674	2.54973	0.169634	0.727525
CG12662	0	0	0	0	0	0	0	0	0	0	0	-1.26239	0	1	1
CG12672	0.828911	1.03105	3.13282	1.98747	1.39225	2.0996	0	2.08191	3.77395	0.66945	-0.352429	1.57464	0.998661	0.320401	0.882172
CG12674	0	0	0	0	0	0	0	0	0	0	0	-1.27761	0	1	1
CG12679	0	0	0	0	0	0	0	0	0	0	0	-1.30545	0	1	1
CG12680	0.207228	0	0	0	0	0	0	0.173492	0	0	-0.327443	-1.24823	0.0984408	0.755799	1
CG12681	0.207228	0	0	0.22083	0.0662977	0	0	0.346984	0	0	-0.00297285	-0.955143	7.95502e-05	0.992909	1
CG12682	0	0	0	0	0	0	0	0	0	0	0	-1.22849	0	1	1
CG12684	0	0	0	0	0	0	0	0	0	0	0	-1.23676	0	1	1
CG12688	0	0.20621	0	0.22083	0.198893	0	0	0.346984	0	0.334725	-0.0384395	-0.862322	0.000769234	0.97794	1
CG12689	0.207228	0.20621	0.939847	0	0.132595	0.123506	0	0.173492	0	0.334725	0.654182	-0.886428	0.44527	0.555155	1
CG12691	0	0	0	0	0	0	0	0	0	0	0	-1.30545	0	1	1
CG12692	0	0	0	0	0	0	0	0	0	0	0	-1.29072	0	1	1
CG12693	0.414455	0	0	0.22083	0.265191	0	0	0	0	0.334725	1.57347	-1.03137	2.13089	0.148313	0.727525
CG12698	0	0.20621	0	0	0	0	0	0	0	0.334725	-0.392804	-1.02949	0.108447	0.751481	1
CG12699	0	0.20621	0	0	0	0	1.45569	0	0	0	-0.456887	-1.23213	0.0978319	0.75653	1
CG12702	1.03614	0.20621	0.313282	0	0.530382	0.247012	0	0	0.314496	0.334725	1.0849	-0.0853266	1.46267	0.229775	0.821425
CG12708	0	0	0	0	0.132595	0	0	0	0	0	1.66876	-0.43545	1.55154	0.216992	0.802617
CG1271	21.5517	20.8272	19.4235	19.2122	22.2097	22.1076	13.1012	22.3805	14.1523	21.4224	0.0846465	4.47957	0.450655	0.613827	1
CG12713	2.90119	3.09315	1.56641	3.09162	2.9171	3.33466	4.36706	4.85778	1.57248	2.00835	-0.203977	1.67398	0.532989	0.46731	1
CG12715	0	0	0	0.22083	0	0.123506	0	0	0	0	-0.277073	-1.1543	0.0667269	0.797125	1
CG12716	1.03614	0	0.939847	0.44166	0.795572	0.61753	0	0.867461	0.628992	1.3389	-0.23313	2.05259	0.214669	0.69059	1
CG12717	16.1638	21.652	19.7368	19.2122	16.3755	20.749	7.27843	15.0938	15.0958	16.4015	0.197231	4.23802	1.52281	0.596617	1
CG12721	1.24337	0.20621	0	0	0.265191	0	0	0	0.314496	0	2.30517	-0.231704	2.974	0.0887222	0.637282
CG12723	0.207228	0	0	0.22083	0	0	1.45569	0.346984	0	0	-0.961191	-0.969256	0.731302	0.395179	0.94246
CG12725	0	0	0	0	0	0	0	0	0	0	0	-1.24748	0	1	1
CG12728	9.94693	14.0223	14.0977	13.4706	13.3921	14.2032	11.6455	13.3589	10.0639	15.3973	-0.0211468	3.68123	0.0158129	0.90022	1
CG12729	0	0	0	0	0	0	0	0	0	0	0	-1.29111	0	1	1
CG1273	0.414455	0	0	0	0	0.494024	0	0.173492	0	0	-1.37436	-0.696323	1.70274	0.195529	0.769459
CG12730	45.7973	40.4171	39.4736	36.2161	42.3642	36.3108	40.7592	48.4043	42.1425	41.5059	-0.0340284	5.32781	0.0830222	0.988784	1
CG12736	37.5082	30.3129	30.0751	37.9827	40.2427	32.8526	34.9364	35.9129	31.4496	30.7947	0.0988282	5.04449	0.892108	0.347517	0.902037
CG12744	2.69396	2.47452	3.75939	3.09162	3.31489	2.22311	4.36706	3.12286	1.25798	0.66945	0.52835	1.30819	1.91206	0.170267	0.727525
CG12746	47.4551	47.4283	47.9322	54.7658	48.994	50.267	56.7717	52.2212	49.0614	49.874	-0.0533861	5.71474	0.378572	0.539972	1
CG1275	153.763	137.748	138.784	155.906	146.584	152.9	181.961	177.656	144.668	178.074	-0.1822	7.40053	4.0434	0.0474345	0.522845
CG12766	2.2795	3.50557	2.50626	2.87079	3.04969	1.9761	0	1.04095	0.628992	2.34307	0.991284	1.31608	6.23782	0.0143832	0.304457
CG12768	19.2722	21.8582	29.1352	26.2787	24.8616	23.2191	13.1012	22.554	22.3292	25.1044	0.121524	4.32939	0.964367	0.328807	0.889978
CG12769	69.8357	60.0071	58.8971	65.8073	70.8722	70.769	97.5309	77.551	73.9065	82.677	-0.277021	5.99418	7.52531	0.00738414	0.212224
CG12772	26.3179	27.6321	24.7493	27.8246	30.2318	30.6295	33.4808	30.0141	25.1597	31.4641	-0.117078	4.97713	1.42828	0.340074	0.897111
CG12773	37.9227	40.6233	35.4009	37.9827	42.1653	42.4861	20.3796	34.8719	36.796	34.1419	0.138418	5.3027	1.44643	0.232358	0.826596
CG12780	0	0	0	0	0	0	0	0	0	0	0	-0.973315	0	1	1
CG12782	0	0	0	0	0	0	0	0	0	0	0	-1.30545	0	1	1
CG12783	0.207228	0	0.313282	0.22083	0.198893	0.123506	0	0.693969	0.943488	0.334725	-1.21036	-0.39427	2.69178	0.10447	0.680552
CG12784	0	0	0	0	0	0	0	0	0	0	0	-1.30545	0	1	1
CG12788	0	0	0	0	0	0	0	0	0	0	0	-1.30545	0	1	1
CG12795	17.1999	15.4657	19.4235	13.9123	17.37	16.9203	16.0125	16.4818	21.7002	16.0668	-0.0752178	4.38094	0.283818	0.606181	1
CG12796	0.207228	0.20621	0	0	0	0	0	0	0.628992	0	-0.483834	-1.14165	0.18581	0.667994	1
CG12811	21.7589	17.3216	22.243	17.2247	19.6904	14.8207	8.73411	12.8384	13.2088	16.4015	0.505303	4.03726	7.85471	0.00624554	0.193461
CG12814	80.8188	74.8542	74.5612	79.7196	77.5683	81.1435	97.5309	108.953	79.5675	75.3131	-0.183644	6.1415	3.0543	0.0840446	0.628587
CG12817	12.8481	18.3527	14.7243	15.0164	14.6518	16.3028	11.6455	13.5324	20.1277	15.0626	-0.0604321	4.49268	0.227073	0.634895	1
CG12818	5.38792	5.36146	8.45862	6.40406	4.90603	5.55777	1.45569	2.77588	9.12038	4.35142	0.242447	2.49872	0.622672	0.432197	0.976128
CG12822	35.0215	33.6122	34.7743	35.3328	40.309	44.7092	43.6706	37.3008	44.6584	40.5017	-0.224541	5.34887	6.48305	0.0126475	0.285885
CG12824	0	0	0	0	0.198893	0.123506	0	0.346984	0.314496	0	-1.04801	-0.590414	0.963401	0.329048	0.889978
CG12825	2.90119	1.03105	0.626564	2.42913	1.59114	3.21116	1.45569	3.12286	1.57248	2.6778	-0.600678	1.77443	2.70049	0.10392	0.680216
CG12826	0.621683	0	0.313282	0.22083	0.265191	0.247012	0	0	0.314496	0	0.883031	-0.76485	0.765356	0.384177	0.930901
CG12828	0.207228	0	0	0	0	0	0	0	0	0	1.20886	-1.19932	1.15286	0.32055	0.882172
CG12831	0	0.20621	0	0	0	0	0	0.173492	0	0	-0.328288	-1.20611	0.0963104	0.757563	1
CG12836	1.24337	0.61863	0.939847	1.76664	0.795572	1.23506	0	0.520477	1.25798	1.00417	0.153993	0.544089	0.0852335	0.943276	1
CG12848	14.5059	15.2595	13.7844	15.0164	11.2706	11.1155	11.6455	9.02159	13.2088	13.0543	0.274303	3.86631	3.19996	0.0771137	0.6176
CG12849	0	0	0	0	0	0	0	0.173492	0	0	-1.53675	-1.2908	2.35387	0.169634	0.727525
CG12851	72.1152	77.9473	67.669	73.978	69.9441	74.3506	94.6195	85.3582	85.2284	69.6228	-0.160873	6.19339	3.33981	0.0710439	0.593233
CG12853	0.207228	0	0	0	0.0662977	0	0	0	0	0	1.76581	-1.02952	2.29041	0.160087	0.727525
CG12857	0.621683	1.44347	1.56641	1.10415	1.12706	1.23506	2.91137	1.90841	0.943488	2.00835	-0.479021	0.350386	1.21052	0.274259	0.882172
CG12858	370.937	372.415	369.986	359.511	372.195	380.522	441.073	437.894	439.665	440.163	-0.212052	8.51991	6.62736	0.0117301	0.274803
CG12859	67.5562	52.3773	65.7893	75.5238	63.248	54.8367	96.0752	63.4981	71.7051	56.5685	-0.026015	6.16417	0.0442911	0.833804	1
CG12860	0	0	0	0	0	0	0	0	0	0	0	-1.22343	0	1	1
CG12861	0	0	0	0	0	0	0	0	0	0	0	-1.29807	0	1	1
CG12862	0	0	0	0	0.0662977	0	0	0	0	0	1.07441	-1.27716	1.36687	0.32055	0.882172
CG12863	6.83851	6.1863	3.75939	4.4166	8.08832	6.79283	11.6455	7.80715	6.91891	5.3556	-0.234264	2.83231	1.4096	0.618189	1
CG12866	0	0	0	0	0	0	0	0	0	0	0	-1.27693	0	1	1
CG12868	16.5782	16.2906	19.1102	18.3289	11.0054	13.9562	11.6455	15.9613	14.4668	15.3973	0.127414	3.69989	0.577501	0.791638	1
CG12869	2.2795	1.03105	4.38595	3.75411	2.45302	1.85259	0	0.693969	3.14496	1.67362	0.708112	0.956804	4.37125	0.0394615	0.489257
CG1287	0.414455	0.20621	0	0.22083	0.331489	0.370518	0	0.867461	0.314496	0.334725	-0.777146	-0.51765	0.864446	0.355065	0.909104
CG12877	22.3806	25.7762	20.9899	22.7455	19.823	21.6136	4.36706	18.2167	20.1277	23.4307	0.211362	4.49029	1.5526	0.21609	0.801691
CG1288	0	0	0	0	0	0	0	0	0	0.334725	-1.60225	-1.29066	2.30812	0.169634	0.727525
CG12880	2.48673	3.29936	2.81954	2.42913	1.52485	3.08765	1.45569	3.12286	2.20147	1.67362	-0.0653479	1.36513	0.0431369	0.835952	1
CG12883	4.14455	5.98009	7.51877	5.29992	4.50824	5.43427	2.91137	2.94937	3.45945	6.02505	0.301191	2.44264	1.53546	0.298654	0.882172
CG12885	4.35178	1.03105	1.87969	2.87079	1.85634	2.96415	1.45569	3.64334	2.51597	2.6778	-0.277458	1.28155	0.563436	0.454901	0.998951
CG12895	25.2818	28.0445	29.1352	26.4996	26.3202	27.0478	36.3921	30.3611	25.1597	20.7529	-0.00715395	4.68665	0.00347749	0.953111	1
CG12896	3.93733	1.64968	2.81954	1.98747	2.65191	2.22311	4.36706	2.08191	1.88698	3.01252	0.107884	1.29917	0.0683359	0.794392	1
CG12898	0	0	0	0	0.0662977	0	0	0	0	0	1.07521	-1.20839	1.34785	0.32055	0.882172
CG12902	0	0	0	0	0	0	0	0	0	0	0	-1.30545	0	1	1
CG12907	0	0	0	0	0	0	0	0	0	0	0	-1.30545	0	1	1
CG12909	6.0096	3.09315	3.13282	2.64996	4.44195	3.45817	1.45569	1.73492	4.71744	3.68197	0.308852	1.97551	0.813523	0.369566	0.916899
CG1291	17.6143	16.2906	17.2305	16.3414	19.7567	19.514	13.1012	16.6553	18.2408	15.7321	0.0278984	4.19737	0.0426017	0.836958	1
CG12910	6.83851	7.62977	9.39847	9.93734	10.6739	10.251	20.3796	9.71556	12.2653	11.7154	-0.367171	4.01145	6.8209	0.0858395	0.630165
CG12911	1.03614	0.20621	0	0.883319	0.596679	0.61753	1.45569	1.04095	2.20147	2.00835	-1.22727	-0.0961456	4.55936	0.0355446	0.470748
CG12912	0	0	0	0	0	0	0	0	0	0	0	-1.30545	0	1	1
CG12913	24.6601	25.7762	24.1227	24.9538	22.6075	28.4064	26.2023	27.0648	24.8452	25.4391	-0.122073	4.74976	1.48019	0.227029	0.816493
CG12914	0	0	0	0	0	0	0	0	0	0	0	-1.25519	0	1	1
CG12917	0	0	0	0.22083	0.198893	0.123506	0	0.173492	0	0	0.212792	-0.990932	0.0451041	0.83242	1
CG12920	0	0	0	0	0	0	0	0	0	0.334725	-1.60131	-1.18697	2.54874	0.169634	0.727525
CG12923	0.414455	0.20621	0	0.22083	0.331489	0.123506	1.45569	0	0.314496	0.334725	0.261509	-0.325357	0.128023	0.721356	1
CG12926	24.6601	27.4259	30.3884	25.8371	23.2705	21.3665	27.658	20.6456	17.6118	19.7488	0.337063	4.37645	6.60231	0.0118842	0.277248
CG12929	3.31564	2.47452	3.4461	3.31245	3.51378	3.58168	7.27843	2.94937	4.08845	6.6945	-0.443018	2.10552	3.24575	0.156246	0.727525
CG12934	0.414455	0	0	0.44166	0.132595	0.123506	0	0.346984	0.314496	0	0.00724598	-0.656807	5.35142e-06	0.99816	1
CG12935	6.63128	7.01114	7.20549	6.62489	6.62977	5.80478	10.1898	6.07223	4.08845	4.68615	0.272295	2.84676	1.70128	0.195554	0.769459
CG12942	9.7397	11.5478	10.6516	9.49568	9.21538	10.8685	1.45569	9.02159	5.34643	7.02922	0.362206	3.09117	2.90614	0.167838	0.727525
CG12945	49.113	53.4084	44.7994	36.6577	46.7399	50.267	30.5694	57.9464	45.6019	38.1586	5.39538e-05	5.34478	1.14393e-07	0.999731	1
CG12947	4.76624	4.74283	3.75939	4.85826	4.77343	4.56972	2.91137	4.16381	4.08845	4.0167	0.151459	2.53112	0.434324	0.511612	1
CG12948	9.11802	8.66081	9.08518	8.1707	10.475	9.26295	11.6455	6.7662	10.6929	11.0459	-0.0417076	3.47158	0.0685679	0.794051	1
CG12950	142.78	146.203	147.869	145.527	139.093	159.57	205.252	175.921	175.174	143.262	-0.240036	7.06924	6.27787	0.0140834	0.301631
CG12951	0	0	0	0	0	0	0	0	0	0	0	-1.25749	0	1	1
CG12963	0.207228	0	0	0	0	0.123506	0	0	0	0	-0.289648	-0.718971	0.0584508	0.809657	1
CG12964	0.414455	0.82484	1.25313	1.10415	0.596679	1.23506	0	0.867461	1.57248	1.00417	-0.43704	0.309609	1.1406	0.288474	0.882172
CG12970	1.03614	0.20621	0	0.22083	0.596679	0.123506	1.45569	0.346984	0.314496	0	0.746811	-0.717586	0.85138	0.358831	0.911293
CG12971	0	0.20621	0	0.44166	0.132595	0.123506	0	0.173492	0	0	0.630037	-0.916839	0.377215	0.565605	1
CG12974	1.45059	0.82484	0.939847	1.10415	0.729275	0.61753	0	0.693969	0.628992	1.67362	0.300143	0.0195064	0.212623	0.645868	1
CG12975	16.5782	18.1465	15.9774	12.5873	13.4584	14.3267	17.4682	11.7975	16.6683	11.7154	0.131182	3.89906	0.735774	0.39337	0.940793
CG12983	0	0	0	0	0	0	0	0.173492	0	0	-1.53679	-1.24143	2.3374	0.169634	0.727525
CG12984	0	0	0	0	0	0	0	0	0	0	0	-1.23474	0	1	1
CG12985	1.24337	1.85589	1.87969	0.883319	1.19336	1.60558	1.45569	1.04095	0.943488	0.334725	0.332973	0.746813	0.588271	0.598385	1
CG12986	0	0	0	0	0.132595	0	0	0	0	0	1.64639	-1.20795	2.2889	0.160087	0.727525
CG1299	78.1248	48.6655	48.2455	45.4909	52.8393	46.4383	42.2149	66.968	42.1425	49.5393	0.120026	5.81636	0.919854	0.340166	0.897186
CG12990	0.207228	0	0	0	0.132595	0	0	0	0	0.334725	0.542696	-1.05847	0.266383	0.607283	1
CG12991	86.4139	85.5771	85.526	94.2943	88.9715	83.8606	93.1638	111.555	112.904	100.083	-0.190312	6.48997	5.36176	0.022931	0.378525
CG12992	0.828911	1.23726	0.313282	1.10415	0.729275	0.247012	1.45569	1.21445	0.628992	0.66945	0.237359	0.329138	0.182837	0.670001	1
CG12994	17.4071	12.5788	17.8571	14.5748	15.7126	18.1554	17.4682	15.0938	12.2653	12.7195	0.0491836	4.10101	0.125471	0.968303	1
CG12995	0.621683	0.20621	0	0.44166	0.265191	0.247012	1.45569	0	0.943488	0.66945	-0.46944	-0.234583	0.316954	0.575119	1
CG12998	1.24337	0	0	1.32498	0.132595	0.123506	1.45569	0.173492	0.314496	0.66945	0.600631	-0.139538	0.536938	0.46567	1
CG13000	0	0	0	0	0	0	0	0	0	0	0	-1.23423	0	1	1
CG13001	13.2626	14.4347	15.0375	14.5748	13.0606	14.2032	8.73411	11.1035	15.7248	14.3932	0.0723103	3.71005	0.255979	0.786244	1
CG13002	0.414455	0.20621	0.313282	0	0	0.494024	0	0.520477	0	0	-0.937143	-0.942274	0.726077	0.396864	0.94335
CG13003	29.2191	29.6942	26.3157	22.5246	22.0108	22.7251	16.0125	30.7081	16.6683	19.414	0.227475	4.57795	2.46651	0.307684	0.882172
CG13004	10.5686	10.9291	13.1579	8.1707	14.8507	9.26295	7.27843	9.19509	14.4668	10.3765	0.172512	3.66857	1.12631	0.291496	0.882172
CG13005	7.66742	3.91799	4.38595	7.28738	5.03863	7.28686	4.36706	5.03127	5.66093	5.69032	-0.0539811	2.58915	0.064677	0.79985	1
CG13008	1.86505	0.61863	1.56641	0.662489	0.928168	1.35857	1.45569	1.04095	0.943488	1.3389	-0.133409	1.00196	0.100803	0.751628	1
CG13010	0.414455	0	0.626564	0.22083	0.0662977	0	0	0.173492	0.628992	0	0.400099	-0.413692	0.164047	0.727423	1
CG13012	10.7758	9.07323	11.5914	10.1582	9.61317	10.251	8.73411	9.88906	11.6363	7.69867	0.0504589	3.48127	0.0808504	0.971979	1
CG13014	6.42406	3.71178	5.63908	8.61236	5.7679	4.0757	5.82274	6.07223	3.77395	5.69032	0.277995	2.7176	1.55762	0.215356	0.800682
CG13016	9.94693	7.83598	6.89221	7.72904	8.41981	9.88048	10.1898	10.0625	9.43488	7.02922	-0.177472	3.28829	0.865942	0.354651	0.908321
CG13018	5.18069	3.50557	5.63908	5.07909	4.97233	3.21116	5.82274	3.46984	5.03193	4.0167	0.288989	2.20517	1.18554	0.279232	0.882172
CG13021	0	0	0	0.22083	0	0	0	0	0.628992	0	-1.15942	-1.19947	0.872312	0.35551	0.909679
CG13022	2.69396	3.71178	2.50626	2.87079	2.9171	3.21116	4.36706	2.2554	2.20147	4.68615	-0.0756957	2.19113	0.0690126	0.860494	1
CG13023	0.828911	0.82484	0.626564	0.662489	0.86187	1.35857	0	1.04095	1.88698	1.67362	-0.773321	0.262667	2.44485	0.121534	0.721654
CG13024	10.3614	10.3105	8.14534	7.94987	10.8728	6.42231	8.73411	12.4914	8.17689	11.3806	0.0273472	2.98261	0.0238596	0.8776	1
CG13025	12.0192	11.3415	9.08518	14.1331	11.3369	12.8446	16.0125	9.36858	9.12038	9.70702	0.0970659	3.4409	0.2511	0.617564	1
CG13026	4.76624	5.77388	4.69923	9.49568	6.03309	7.78088	16.0125	8.32763	9.74937	6.6945	-0.506573	2.83306	2.76203	0.100118	0.670861
CG13028	0	0	0	0	0	0	0	0	0	0	0	-1.21293	0	1	1
CG13029	0	0	0	0.22083	0.0662977	0	0	0	0	0	1.77003	-1.16892	2.30099	0.160087	0.727525
CG13031	0	0	0	0	0	0	0	0	0	0	0	-1.15352	0	1	1
CG13032	0.207228	0	0.313282	0.22083	0.397786	0.741036	0	0	0.314496	0.66945	-0.661051	-0.666681	0.619462	0.433597	0.977542
CG13033	0	0	0	0	0	0.123506	0	0	0	0	-1.49059	-1.1124	1.83357	0.180856	0.74475
CG13038	0.207228	0	0	0	0.198893	0	0	0.173492	0	0	0.894304	-0.731458	0.599037	0.441251	0.986333
CG13039	0	0	0	0	0	0	0	0	0	0	0	-1.30545	0	1	1
CG1304	0	0	0	0	0	0	0	0	0	0	0	-1.13041	0	1	1
CG13040	0	0	0	0	0	0	0	0	0	0	0	-1.24777	0	1	1
CG13041	0	0	0	0	0.198893	0	0	0.346984	0.314496	0	-0.745224	-0.824135	0.424532	0.516571	1
CG13042	0.207228	0	0	0.22083	0.0662977	0.247012	0	0.867461	0	0.334725	-1.72216	-0.57349	3.5196	0.0639933	0.563724
CG13043	0.414455	0	0	0.22083	2.25412	0.370518	0	1.90841	0.628992	0.334725	0.00640839	0.651828	0.00031708	0.985834	1
CG13044	1.24337	0	0	0.662489	1.39225	0	2.91137	2.42889	0	6.6945	-1.46955	0.296861	3.92752	0.0508048	0.522845
CG13045	0	0	0	0	0	0	0	0	0	0	0	-1.22163	0	1	1
CG13046	1.86505	1.64968	1.56641	0.883319	2.8508	1.35857	5.82274	2.77588	2.83046	3.01252	-0.499589	1.21909	1.97749	0.566446	1
CG13047	0	0	0	0.22083	0.0662977	0.494024	0	0	0	0.334725	-1.52561	-0.913246	2.43239	0.122475	0.723714
CG13048	0	0	0	0	0	0	0	0	0	0	0	-1.27753	0	1	1
CG13049	0	0	0	0	0.132595	0	0	0.173492	0.314496	0	-0.66425	-0.996379	0.321388	0.654252	1
CG13050	0	0	0	0	0	0	0	0	0	0	0	-1.29936	0	1	1
CG13051	0.621683	0	0.626564	0.44166	0.530382	1.11155	0	0.867461	0.943488	0.334725	-0.808233	-0.249509	1.59734	0.209649	0.793071
CG13053	0.207228	0.20621	0	0.22083	0	0	0	0	0	0	2.36773	-0.918142	2.87887	0.0934883	0.653167
CG13054	1.65782	2.0621	3.75939	2.64996	2.7845	3.08765	1.45569	2.94937	3.14496	1.67362	-0.0660205	1.39639	0.0486083	0.826018	1
CG13055	3.52287	8.66081	4.07267	6.18323	7.02756	5.43427	8.73411	6.93969	4.08845	8.70285	-0.095778	2.57197	0.19656	0.870254	1
CG13056	0.621683	0.20621	0.313282	0.44166	1.45855	0.123506	0	0.693969	1.57248	0.334725	0.3035	0.0565903	0.270073	0.6046	1
CG13058	0	0	0	0.22083	0.132595	0	0	0.173492	0	0.334725	-0.171914	-1.05371	0.0213885	0.961378	1
CG13059	0	0.41242	0	0	0.265191	0	0	0	0.628992	0.334725	0.0339528	-0.93312	0.00392901	0.950178	1
CG13060	0	0	0	0	0.132595	0	0	0	0	0	1.64691	-1.18113	2.34746	0.160087	0.727525
CG13062	0.207228	0.20621	0	0.662489	0.265191	0.370518	2.91137	0.173492	0.314496	0	-0.371422	-0.196052	0.201719	0.695206	1
CG13063	0.207228	0	0	0	0.331489	0	0	0	0	0	2.83934	-1.21183	5.44917	0.026193	0.406429
CG13064	0	0	0	0	0	0	0	0	0	0	0	-1.25512	0	1	1
CG13065	0.414455	0	0	0	0.132595	0.123506	0	0.693969	0	0.334725	-1.09389	-1.00364	1.51284	0.222541	0.810346
CG13066	0.207228	0	0	0	0.132595	0.123506	0	0	0	0	0.651559	-1.21547	0.353432	0.555982	1
CG13067	33.7781	16.703	16.9172	18.7705	17.6352	15.9323	26.2023	23.0745	29.8771	19.414	-0.10341	3.99454	0.313881	0.576745	1
CG13068	1.03614	0	0.313282	0	0.331489	0.61753	1.45569	0.520477	0	1.3389	-0.90155	-0.346767	1.9429	0.166897	0.727525
CG13069	0.414455	0.20621	0	0.22083	0.464084	0.370518	1.45569	0.346984	0.314496	0.334725	-0.365161	-0.235619	0.219302	0.778352	1
CG1307	32.1203	23.9203	26.629	30.6953	30.2318	26.0598	21.8353	21.6865	27.3611	29.1211	0.17607	4.88922	1.82736	0.179937	0.743552
CG13070	0	0	0.313282	0	0	0	0	0	0	0	1.2371	-1.26296	1.12027	0.32055	0.882172
CG13071	8.28911	12.1664	9.08518	8.83319	12.9281	11.8566	10.1898	11.624	13.2088	15.7321	-0.282932	3.35607	1.98883	0.169339	0.727525
CG13073	0.828911	0.41242	0.313282	0.22083	0	0.370518	1.45569	0.346984	0	0.66945	-0.385858	-0.613091	0.224492	0.636823	1
CG13074	0.828911	0.61863	0	0.22083	0.265191	0.123506	0	0.520477	0.314496	0.334725	0.368454	-0.562265	0.217759	0.641917	1
CG13075	0	0	0.313282	0.22083	0.0662977	0.741036	1.45569	0.346984	0.314496	0	-1.99025	-0.741611	5.4701	0.0216319	0.369598
CG13077	38.3371	39.5923	43.2329	45.2701	40.1764	33.7172	30.5694	37.4743	47.4889	38.1586	0.118244	5.35061	0.869058	0.353791	0.907858
CG13078	0	0	0	0	0	0	0	0.346984	0.314496	0	-2.78681	-1.19265	4.92145	0.0323891	0.448042
CG13081	0	0	0.313282	0.22083	0.132595	0	0	0	0	0	2.55602	-0.998734	5.65761	0.0469604	0.521467
CG13082	3.93733	2.68073	1.56641	5.52075	4.30935	4.0757	1.45569	3.29635	5.34643	6.35977	-0.235443	2.22543	0.592824	0.443411	0.988265
CG13083	0	0	0	0	0	0	0	0	0	0	0	0.61937	0	1	1
CG13084	0	0	0	0	0	0	0	0.346984	0	0	-2.26439	0.420458	2.93563	0.0907663	0.644144
CG13085	0.828911	0.82484	0.626564	1.10415	0.662977	0.741036	1.45569	0.867461	0.943488	1.00417	-0.170535	0.464311	0.134365	0.714837	1
CG13086	3.7301	5.98009	3.75939	3.31245	5.6353	1.48207	2.91137	1.73492	0.628992	2.6778	1.44059	2.25365	9.18486	0.00321196	0.137905
CG13088	2.48673	5.56767	3.13282	2.64996	4.30935	3.70518	5.82274	4.5108	4.71744	3.34725	-0.177381	2.17693	0.561411	0.689906	1
CG1309	74.1875	68.6679	62.9697	70.2239	68.2866	70.6455	80.0627	80.6739	53.1498	71.6311	-0.0368601	6.36573	0.161502	0.688761	1
CG13090	4.55901	5.77388	10.9649	7.72904	7.62424	7.90439	13.1012	5.72524	6.28992	7.69867	-0.0269383	3.19044	0.0223404	0.955049	1
CG13091	0	0.20621	0	0.22083	0	0.123506	0	0	0	0	0.402656	-1.13883	0.088039	0.840512	1
CG13096	12.2264	11.1353	12.218	9.71651	15.5137	12.4741	4.36706	6.7662	10.3784	8.36812	0.421604	3.52015	2.70471	0.103654	0.680194
CG13097	15.3348	11.9602	9.39847	9.71651	15.1822	14.6972	4.36706	7.80715	9.74937	10.7112	0.272293	3.64396	1.23865	0.26879	0.882172
CG13101	10.7758	9.27944	8.45862	6.40406	10.6076	8.1514	8.73411	15.4408	5.66093	7.36395	-0.0215566	3.27198	0.00840646	0.927157	1
CG13102	0	0	0	0	0	0	0	0	0	0	0	-0.893564	0	1	1
CG13108	15.5421	15.0533	13.4711	17.2247	14.6518	17.1673	5.82274	11.4505	19.1843	19.0793	-0.0332832	3.94586	0.0275288	0.868606	1
CG1311	39.166	38.7675	35.4009	38.6452	33.0163	36.6813	36.3921	41.6381	37.425	27.1127	0.0358422	5.59418	0.0866136	0.769227	1
CG13110	0	0	0	0	0	0	0	0	0	0	0	-1.30545	0	1	1
CG13113	0	0	0	0	0	0	0	0	0	0	0	-1.06921	0	1	1
CG13114	0	0	0	0	0.0662977	0.123506	0	0	0	0	-0.410853	-0.444282	0.0783055	0.780376	1
CG13116	27.354	25.7762	25.0626	25.8371	24.9279	25.8128	32.0251	27.0648	22.6437	23.096	0.0127881	4.35128	0.00864446	0.962859	1
CG13117	53.4647	52.3773	46.9923	62.9365	60.8613	54.3427	48.0376	55.8645	61.6412	56.5685	-0.00911986	5.74924	0.00752169	0.931087	1
CG13123	1.86505	3.71178	5.01252	2.64996	3.44748	5.06375	4.36706	3.12286	2.83046	5.02087	-0.303025	2.02766	1.33746	0.250641	0.854048
CG13124	413.212	401.903	411.966	393.74	399.576	437.952	411.959	475.022	357.582	413.385	-0.0542961	8.60158	0.475792	0.492167	1
CG13126	13.8843	12.9912	13.1579	13.4706	12.3977	12.2271	18.9239	12.4914	13.8378	14.0584	-0.046308	3.68289	0.148294	0.919306	1
CG13127	0	0	0	0	0	0	0	0	0	0	0	-1.30545	0	1	1
CG13131	0	0	0	0	0	0	0	0	0	0	0	-1.28377	0	1	1
CG13133	18.0288	2.0621	6.89221	8.61236	5.6353	15.4383	8.73411	6.07223	9.12038	8.36812	-0.275854	2.83977	0.185457	0.667787	1
CG13135	0	0	0	0	0	0	0	0	0	0	0	-1.23722	0	1	1
CG13137	0.207228	0	0	0.22083	0.132595	0	0	0	0	0	2.53083	-1.20792	4.66833	0.0469604	0.521467
CG13138	0	0	0	0.22083	0	0.123506	0	0	0	0	-0.277162	-1.14913	0.0769118	0.782494	1
CG1314	0	0.20621	0	0.22083	0.0662977	0	0	0.173492	0	0	0.719521	-1.02484	0.38574	0.555473	1
CG13142	8.28911	6.39251	6.26564	9.93734	8.02202	8.39841	8.73411	7.98064	9.43488	6.6945	-0.0651439	3.14287	0.120178	0.729677	1
CG13144	2.69396	1.03105	1.56641	2.2083	1.39225	0.988048	1.45569	1.04095	2.83046	1.67362	0.207686	1.02906	0.201869	0.654332	1
CG13148	6.0096	5.77388	3.75939	6.84572	7.88943	7.28686	11.6455	6.24572	6.60441	8.70285	-0.261243	2.91461	1.56054	0.502102	1
CG1315	8.70356	7.83598	8.7719	3.53328	10.0773	3.08765	1.45569	1.90841	0.628992	3.68197	1.74393	2.82227	16.379	0.00011188	0.0252895
CG13151	3.93733	5.36146	4.38595	6.18323	6.62977	5.80478	0	4.85778	5.97542	4.0167	0.15486	2.74104	0.44651	0.505763	1
CG13154	0.207228	0	0	0	0.0662977	0	0	0.173492	0	0.66945	-1.08244	-1.02273	0.94	0.342294	0.898448
CG13155	0	0	0	0	0	0	0	0	0	0	0	-1.21435	0	1	1
CG13157	0	0	0	0	0	0	0	0	0	0	0	-1.30545	0	1	1
CG13159	0	0	0	0	0	0.123506	0	0	0	0	-1.4906	-1.11158	1.83475	0.186723	0.752425
CG1316	162.052	174.866	183.583	167.389	157.789	188.964	190.695	157.357	176.118	160.668	-0.0431383	7.44342	0.329389	0.567497	1
CG13160	0	0	0	0	0	0	0	0	0	0	0	-1.17032	0	1	1
CG13163	7.46019	10.9291	10.6516	12.1456	9.81206	6.91634	10.1898	10.0625	7.5479	8.36812	0.278905	3.11214	2.80771	0.0973955	0.664138
CG13168	2.2795	2.47452	2.19298	2.87079	2.05523	2.59363	2.91137	2.08191	2.51597	2.00835	-0.00249018	1.40823	5.87738e-05	0.993901	1
CG1317	200.182	186.62	187.656	201.618	196.44	210.578	203.796	195.699	197.503	198.827	-0.0487723	7.71275	0.443836	0.507036	1
CG13170	0	0	0	0	0	0	0	0	0	0	0	-1.12944	0	1	1
CG13171	0	0	0	0	0	0	0	0	0	0	0	-1.28406	0	1	1
CG13175	0	0	0	0	0	0	0	0	0	0	0	-1.30545	0	1	1
CG13177	2.90119	0	0	1.32498	1.72374	0.370518	0	2.42889	0	4.0167	-0.207048	0.972399	0.0449465	0.832597	1
CG13178	1.45059	0.41242	1.56641	0.662489	0.928168	0.988048	1.45569	0.693969	0.314496	2.00835	-0.0284278	0.821126	0.00268002	0.968078	1
CG13183	0.621683	1.23726	0.939847	1.10415	1.32595	0.370518	1.45569	2.08191	0.943488	1.00417	-0.0411002	0.758494	0.00873858	0.925736	1
CG13185	31.2914	42.8917	36.3407	38.4244	48.4636	36.4343	11.6455	24.2889	23.2727	30.1252	0.554545	5.11366	9.8372	0.00233212	0.117498
CG13186	0	0	0	0	0	0	0	0	0	0	0	-1.27663	0	1	1
CG13188	5.18069	5.36146	5.63908	6.40406	7.82313	6.1753	11.6455	7.11318	9.74937	10.0417	-0.415719	3.11898	4.36319	0.153116	0.727525
CG1319	23.4167	28.457	25.0626	25.3954	28.1102	22.4781	26.2023	28.2792	20.4422	28.4516	0.0644989	4.64228	0.313015	0.577271	1
CG13192	13.0553	12.1664	9.71175	13.4706	13.1932	13.4622	26.2023	13.0119	9.12038	10.0417	-0.0485325	3.86303	0.0995118	0.90745	1
CG13193	0	0	0	0	0	0.123506	0	0	0	0	-1.49013	-1.17318	2.31376	0.169634	0.727525
CG13196	0	0.20621	0	0	0	0	0	0	0	0	1.20874	-1.22705	1.29542	0.32055	0.882172
CG13197	27.354	32.9936	33.2079	32.9036	27.9113	32.4821	33.4808	31.5756	28.6191	26.4433	0.0188586	5.01902	0.0372305	0.847445	1
CG13198	0	0	0	0	0.0662977	0	0	0.173492	0	0	-0.460692	-1.11478	0.133872	0.751481	1
[truncated: 14,728 more rows]
