# Supplementary material for: Experimentally induced active and quiet sleep engage non-overlapping transcriptional programs in Drosophila
Source: bioRxiv preprint, doi:10.1101/2023.04.03.535331, version 3 (2023-10-15)
Supplement: Figure6-source data 2 [file 535331_file15.xlsx]

## Sheet: Sleep deprivation significant  
R23E10Gal4 > UASChrimson +THIP vs -THIP in sleep deprived background
Downregulated			Upregulated
Gene Name	Log2Fold Change	qFDR	Gene Name	Log2Fold Change	qFDR
Diedel	-7.7717	0.0009	CG42708	0.7049	0.0011
TotM	-6.4914	0.0084	CG10383	1.0093	0.0014
TotX	-5.7652	0	CG4000	1.1506	0.029
CG4650	-5.3108	0.0464	TpnC73F	1.4067	0
TotC	-5.2109	0.0146	CG40198	1.5108	0.0092
TotA	-4.8806	0.0236	Cpr100A	1.526	0.0468
CG30098	-4.7458	0.0241	Mal-A1	1.7502	0.0103
CG30287	-4.5685	0.009	CG11349	1.9902	0.0401
TotB	-4.0547	0.0418	Mal-A6	2.5629	0.0011
CG43085	-3.3226	0.0005	CG32483	2.5913	0.0129
PPO1	-1.9296	0.0195	TpnC47D	2.6796	0.0007
CG4259	-1.553	0.0005	CG14075	2.7317	0.0024
CG4950	-1.4014	0	Act88F	3.4955	0.0004
NtR	-1.3692	0	dhd	3.7097	0.0114
mthl2	-1.3686	0.0172	CG3344	3.8101	0.0067
lectin-24Db	-1.3575	0.0004	Bace	3.8462	0.0072
CG14526	-1.2443	0.0273	CG10912	3.9147	0.0195
nAChRbeta3	-1.2181	0.0006	yip7	4.0158	0.0127
eater	-1.1653	0.0024	CR44106	4.1437	0.0212
Karl	-1.0867	0.0024	CG43134	4.3032	0.0007
Hml	-1.0807	0.0005	Kaz-m1	4.4162	0.0079
Ance-5	-1.0653	0.0015	CG13323	4.4198	0.0112
CG1092	-1.0169	0.0005	yl	4.5536	0.0227
regucalcin	-1.0077	0	CG10911	4.5897	0.0114
Sr-CI	-1.0029	0.0216	CG8952	4.6294	0.0213
Ppn	-0.9333	0.0002	CG15043	4.6387	0
NimB5	-0.9148	0.0093	TpnC4	4.6662	0.0114
CG15117	-0.9134	0.031	Amy-p	4.7024	0.0236
CG10131	-0.8772	0.0387	CG3868	4.7338	0.0026
CG5618	-0.7187	0.0166	CG13324	4.7804	0.0304
CG17574	-0.7125	0.0013	CG31823	4.7827	0.046
Cys	-0.6962	0.0248	Jon65Aiv	4.8228	0.0024
			fln	4.8444	0.0032
			CG5107	5.0148	0
			osk	5.0375	0.0081
			CG5399	5.3402	0.0001
			CR45272	5.3462	0.0436
			CG14545	5.4584	0.0273
			Jon99Ciii	5.4863	0.0001
			CG10405	5.5045	0.0131
			CG33346	5.5188	0.0005
			CG30334	5.5463	0.0064
			alphaTry	5.6006	0.0011
			Jon65Aiii	5.6412	0.0013
			Akh	5.6719	0
			epsilonTry	5.6736	0.0139
			CG10910	5.7243	0.0118
			CG7567	5.7732	0.0418
			CG4783	5.9227	0.0002
			Jon99Ci	5.9292	0.0009
			CG12374	5.9485	0.0003
			CG32557	6.0067	0.0114
			Cht9	6.0276	0.0011
			CG18180	6.2313	0
			Cht4	6.4072	0.0084
			vanin-like	6.4911	0.0012
			CG34220	6.5176	0
			CG17192	6.5812	0.009
			CG17633	6.6095	0.0018
			CG43673	6.6297	0.0005
			CG31821	6.6621	0.0011
			Jon99Cii	6.7405	0
			betaTry	6.85	0.0004
			nos	6.9588	0.0067
			CG14645	7.0642	0
			Cht8	7.1889	0
			Jon74E	7.2927	0
			CG6295	7.3725	0.0014
			CG14125	7.4124	0
			CG34324	7.4506	0.0001
			Phae2	7.7006	0.0015
			Muc68D	7.7819	0
			CG5506	7.8432	0.0002
			CG11672	8.4284	0.0144
			CG3906	9.3047	0.0001
			CG6839	9.7074	0
			CG31077	10.0813	0

## Sheet: All genes
Row.names	dm9_1	dm9_2	dm9_3	dm9_4	dm9_5	dm10_1	dm10_2	dm10_3	dm10_4	dm10_5	logFC	logCPM	F	PValue	FDR
128up	21.1965	17.0256	19.7386	17.4239	25.8508	23.8234	19.0259	18.3002	23.5301	22.3418	-0.0879626	4.49957	0.49222	0.484808	1
140up	13.5978	14.4063	10.6285	13.4413	12.1826	14.8623	10.2447	11.8951	12.5936	16.9256	-0.0417792	3.85757	0.0984319	0.871755	1
14-3-3epsilon	561.108	625.27	707.552	652.897	558.616	530.016	601.145	542.601	650.227	550.421	0.111716	9.19045	1.79374	0.183953	0.886663
14-3-3zeta	1502.95	1556.07	1774.57	1812.33	1652.97	1528.63	1525.91	1580.83	1603.36	1487.87	0.103135	10.6062	1.92676	0.168651	0.886663
18w	40.7933	53.6961	57.3178	43.5596	51.9988	57.7007	42.9912	41.4805	55.0141	51.9052	-0.0080026	5.44024	0.00370566	0.951599	1
26-29-p	83.9862	102.528	93.7582	82.8878	89.4379	125.018	109.033	78.6909	113.674	107.647	-0.238574	6.83069	2.67312	0.105662	0.808604
2mit	127.179	129.657	138.929	152.085	129.551	93.3266	134.828	126.881	132.896	129.989	0.133694	7.24247	2.22172	0.139691	0.861897
312	14.7976	14.9676	15.1835	16.1793	13.3711	15.518	16.4647	14.3352	10.9365	17.377	-0.0134935	3.92417	0.011204	0.915945	1
4EHP	153.975	166.888	220.541	207.593	197.298	179.441	157.147	200.692	194.206	179.411	0.0561293	7.43629	0.310912	0.57855	1
4E-T	129.179	113.379	130.199	138.644	137.277	117.369	118.729	128.711	126.267	125.701	0.0725242	6.98591	0.461063	0.498926	1
5.8SrRNA:CR40454	886.254	5.98703	5.31423	12.9434	7.13126	10.2725	6.76883	58.5607	922.315	5.86754	-0.136922	5.96192	0.013958	0.906225	1
5-HT1A	73.1879	58.3735	61.1137	72.6824	56.753	57.2636	60.7365	66.4908	57.334	60.4808	0.0898087	6.06899	0.936111	0.335957	0.961922
5-HT1B	37.5938	31.9932	40.9955	33.8521	32.685	39.3414	37.8689	37.2104	36.4551	35.8823	-0.0845071	5.22628	0.602277	0.439811	1
5-HT2A	107.582	111.508	93.7582	115.993	109.643	102.288	106.289	116.206	114.668	101.779	-0.00413397	6.94023	0.00190676	0.96527	1
5-HT2B	26.7956	25.4449	29.2283	30.6162	31.4964	26.009	27.4412	30.8054	27.1756	26.1783	0.062126	4.83607	0.242255	0.623819	1
5-HT7	23.996	27.8771	27.3303	34.3499	30.605	28.6318	30.3683	31.4154	27.1756	28.2093	-0.0106721	4.86802	0.0100811	0.998344	1
5PtaseI	84.3861	75.3991	87.6848	82.8878	71.0155	73.0002	79.2136	81.1309	71.5846	80.3402	0.0561876	6.45989	0.672216	0.473176	1
5SrRNA:CR33353	0	0	0	0	0	0	0	0	0	0	0	-1.30545	0	1	1
5SrRNA:CR33354	0	0	0	0	0	0	0	0	0	0	0	-1.30545	0	1	1
5SrRNA:CR33355	0	0	0	0	0	0	0	0	0	0	0	-1.30545	0	1	1
5SrRNA:CR33357	0	0	0	0	0	0	0	0	0	0	0	-1.30545	0	1	1
5SrRNA:CR33358	0	0	0	0	0	0	0	0	0	0	0	-1.30545	0	1	1
5SrRNA:CR33359	0	0	0	0	0	0	0	0	0	0	0	-1.30545	0	1	1
5SrRNA:CR33360	0	0	0	0	0	0	0	0	0	0	0	-1.30545	0	1	1
5SrRNA:CR33361	0	0	0	0	0	0	0	0	0	0	0	-1.30545	0	1	1
5SrRNA:CR33362	0	0	0	0	0	0	0	0	0	0	0	-1.30545	0	1	1
5SrRNA:CR33364	0	0	0	0	0	0	0	0	0	0	0	-1.30545	0	1	1
5SrRNA:CR33365	0	0	0	0	0	0	0	0	0	0	0	-1.30545	0	1	1
5SrRNA:CR33366	0	0	0	0	0	0	0	0	0	0	0	-1.30545	0	1	1
5SrRNA:CR33367	0	0	0	0	0	0	0	0	0.33141	0	-1.56782	-1.06526	1.07476	0.304396	0.933729
5SrRNA:CR33368	0	0	0	0	0	0	0	0	0	0	0	-1.30545	0	1	1
5SrRNA:CR33369	0	0	0	0	0	0	0	0	0	0	0	-1.30545	0	1	1
5SrRNA:CR33370	0	0	0	0	0	0	0	0	0	0	0	-1.30545	0	1	1
5SrRNA:CR33372	0	0	0	0	0	0	0	0	0	0	0	-1.30545	0	1	1
5SrRNA:CR33373	0	0	0	0	0	0	0	0	0	0	0	-1.30545	0	1	1
5SrRNA:CR33374	0	0	0	0	0	0	0	0	0	0	0	-1.30545	0	1	1
5SrRNA:CR33375	0	0	0	0	0	0	0	0	0	0	0	-1.30545	0	1	1
5SrRNA:CR33376	0	0	0	0	0	0	0	0	0	0	0	-1.30545	0	1	1
5SrRNA:CR33377	0	0	0	0	0	0	0	0	0	0	0	-1.30545	0	1	1
5SrRNA:CR33378	0	0	0	0	0	0	0	0	0	0	0	-1.30545	0	1	1
5SrRNA:CR33379	0	0	0	0	0	0	0	0	0	0	0	-1.30545	0	1	1
5SrRNA:CR33380	0	0	0	0	0	0	0	0	0	0	0	-1.30545	0	1	1
5SrRNA:CR33381	0	0	0	0	0	0	0	0	0	0	0	-1.30545	0	1	1
5SrRNA:CR33382	0	0	0	0	0	0	0	0	0	0	0	-1.30545	0	1	1
5SrRNA:CR33383	0	0	0	0	0	0	0	0	0	0	0	-1.30545	0	1	1
5SrRNA:CR33384	0	0	0	0	0	0	0	0	0	0	0	-1.30545	0	1	1
5SrRNA:CR33385	0	0	0	0	0	0	0	0	0	0	0	-1.30545	0	1	1
5SrRNA:CR33386	0	0	0	0	0	0	0	0	0	0	0	-1.30545	0	1	1
5SrRNA:CR33387	0	0	0	0	0	0	0	0	0	0	0	-1.30545	0	1	1
5SrRNA:CR33388	0	0	0	0	0	0	0	0	0	0	0	-1.30545	0	1	1
5SrRNA:CR33389	0	0	0	0	0	0	0	0	0	0	0	-1.30545	0	1	1
5SrRNA:CR33390	0	0	0	0	0	0	0	0	0	0	0	-1.30545	0	1	1
5SrRNA:CR33391	0	0	0	0	0	0	0	0	0	0	0	-1.30545	0	1	1
5SrRNA:CR33392	0	0	0	0	0	0	0	0	0	0	0	-1.30545	0	1	1
5SrRNA:CR33393	0	0	0	0	0	0	0	0	0	0	0	-1.30545	0	1	1
5SrRNA:CR33394	0	0	0	0	0	0	0	0	0	0	0	-1.30545	0	1	1
5SrRNA:CR33395	0	0	0	0	0	0	0	0	0	0	0	-1.30545	0	1	1
5SrRNA:CR33396	0	0	0	0	0	0	0	0	0	0	0	-1.30545	0	1	1
5SrRNA:CR33397	0	0	0	0	0	0	0	0	0	0	0	-1.30545	0	1	1
5SrRNA:CR33398	0	0	0	0	0	0	0	0	0	0	0	-1.30545	0	1	1
5SrRNA:CR33399	0	0	0	0	0	0	0	0	0	0	0	-1.30545	0	1	1
5SrRNA:CR33400	0	0	0	0	0	0	0	0	0	0	0	-1.30545	0	1	1
5SrRNA:CR33401	0	0	0	0	0	0	0	0	0	0	0	-1.30545	0	1	1
5SrRNA:CR33402	0	0	0	0	0	0	0	0	0	0	0	-1.30545	0	1	1
5SrRNA:CR33403	0	0	0	0	0	0	0	0	0	0	0	-1.30545	0	1	1
5SrRNA:CR33404	0	0	0	0	0	0	0	0	0	0	0	-1.30545	0	1	1
5SrRNA:CR33405	0	0	0	0	0	0	0	0	0	0	0	-1.30545	0	1	1
5SrRNA:CR33406	0	0	0	0	0	0	0	0	0	0	0	-1.30545	0	1	1
5SrRNA:CR33407	0	0	0	0	0	0	0	0	0	0	0	-1.30545	0	1	1
5SrRNA:CR33408	0	0	0	0	0	0	0	0	0	0	0	-1.30545	0	1	1
5SrRNA:CR33409	0	0	0	0	0	0	0	0	0	0	0	-1.30545	0	1	1
5SrRNA:CR33410	0	0	0	0	0	0	0	0	0	0	0	-1.30545	0	1	1
5SrRNA:CR33411	0	0	0	0	0	0	0	0	0	0	0	-1.30545	0	1	1
5SrRNA:CR33412	0	0	0	0	0	0	0	0	0	0	0	-1.30545	0	1	1
5SrRNA:CR33413	0	0	0	0	0	0	0	0	0	0	0	-1.30545	0	1	1
5SrRNA:CR33414	0	0	0	0	0	0	0	0	0	0	0	-1.30545	0	1	1
5SrRNA:CR33415	0	0	0	0	0	0	0	0	0	0	0	-1.30545	0	1	1
5SrRNA:CR33417	0	0	0	0	0	0	0	0	0	0	0	-1.30545	0	1	1
5SrRNA:CR33418	0	0	0	0	0	0	0	0	0	0	0	-1.30545	0	1	1
5SrRNA:CR33419	0	0	0	0	0	0	0	0	0	0	0	-1.30545	0	1	1
5SrRNA:CR33420	0	0	0	0	0	0	0	0	0	0	0	-1.30545	0	1	1
5SrRNA:CR33421	0	0	0	0	0	0	0	0	0	0	0	-1.30545	0	1	1
5SrRNA:CR33422	0	0	0	0	0	0	0	0	0	0	0	-1.30545	0	1	1
5SrRNA:CR33423	0	0	0	0	0	0	0	0	0	0	0	-1.30545	0	1	1
5SrRNA:CR33424	0	0	0	0	0	0	0	0	0	0	0	-1.30545	0	1	1
5SrRNA:CR33425	0	0	0	0	0	0	0	0	0	0	0	-1.30545	0	1	1
5SrRNA:CR33426	0	0	0	0	0	0	0	0	0	0	0	-1.30545	0	1	1
5SrRNA:CR33427	0	0	0	0	0	0	0	0	0	0	0	-1.30545	0	1	1
5SrRNA:CR33428	0	0	0	0	0	0	0	0	0.33141	0	-1.56854	-1.21544	1.45461	0.265234	0.886663
5SrRNA:CR33429	0	0	0	0	0	0	0	0	0	0	0	-1.30545	0	1	1
5SrRNA:CR33430	0	0	0	0	0	0	0	0	0	0	0	-1.30545	0	1	1
5SrRNA:CR33431	0	0	0	0	0	0	0	0	0	0	0	-1.30545	0	1	1
5SrRNA:CR33432	0	0	0	0	0	0	0	0	0	0	0	-1.30545	0	1	1
5SrRNA:CR33433	0	0	0	0	0	0	0	0	0	0	0	-1.30545	0	1	1
5SrRNA:CR33434	0	0	0	0	0	0	0	0	0	0	0	-1.30545	0	1	1
5SrRNA:CR33435	0	0	0	0	0	0	0	0	0	0	0	-1.30545	0	1	1
5SrRNA:CR33436	0	0	0	0	0	0	0	0	0	0	0	-1.30545	0	1	1
5SrRNA:CR33437	0	0	0	0	0	0	0	0	0	0	0	-1.30545	0	1	1
5SrRNA:CR33438	0	0	0	0	0	0	0	0	0	0	0	-1.30545	0	1	1
5SrRNA:CR33439	0	0	0	0	0	0	0	0	0	0	0	-1.30545	0	1	1
5SrRNA:CR33440	0	0	0	0	0	0	0	0	0	0	0	-1.30545	0	1	1
5SrRNA:CR33441	0	0	0	0	0	0	0	0	0	0	0	-1.30545	0	1	1
5SrRNA:CR33442	0	0	0	0	0	0	0	0	0	0	0	-1.30545	0	1	1
5SrRNA:CR33443	0	0	0	0	0	0	0	0	0	0	0	-1.30545	0	1	1
5SrRNA:CR33444	0	0	0	0	0	0	0	0	0	0	0	-1.30545	0	1	1
5SrRNA:CR33445	0	0	0	0	0	0	0	0	0	0	0	-1.30545	0	1	1
5SrRNA:CR33446	0	0	0	0	0	0	0	0	0	0	0	-1.30545	0	1	1
5SrRNA:CR33447	0	0	0	0	0	0	0	0	0	0	0	-1.30545	0	1	1
5SrRNA:CR33448	0	0	0	0	0	0	0	0	0	0	0	-1.30545	0	1	1
5SrRNA:CR33449	0	0	0	0	0	0	0	0	0	0	0	-1.30545	0	1	1
5SrRNA:CR33450	0	0	0	0	0	0	0	0	0	0	0	-1.30545	0	1	1
5SrRNA:CR33451	0	0	0	0	0	0	0	0	0	0	0	-1.30545	0	1	1
5SrRNA:CR33452	0	0	0	0	0	0	0	0	0	0	0	-1.29802	0	1	1
5SrRNA-Psi:CR33356	0	0	0	0	0	0	0	0	0	0	0	-1.30545	0	1	1
5SrRNA-Psi:CR33363	3.19947	0	0	0.248912	0	0	0	0.305003	0.33141	0	2.25973	-0.868537	3.28846	0.0737596	0.742696
5SrRNA-Psi:CR33371	0	0	0	0	0	0	0	0	0	0	0	-1.30545	0	1	1
5SrRNA-Psi:CR33416	0	0	0	0	0	0	0	0	0	0	0	-1.30545	0	1	1
7B2	440.327	392.15	360.609	324.084	300.702	393.633	421.863	374.239	363.226	415.693	-0.115939	8.70109	2.10058	0.150831	0.883079
7SLRNA:CR32864	0	0	0	0	0	0	0	0	0	0	0	-1.30545	0	1	1
7SLRNA:CR42652	0	0	0	0	0	0	0	0	0	0	0	-1.30545	0	1	1
825-Oak	0	0	0	0	0	0	0	0	0	0	0	-1.27624	0	1	1
a	34.7943	31.9932	31.8854	31.6119	21.6909	35.1887	44.6377	40.5655	41.7577	39.4931	-0.409916	5.16355	16.5729	0.000102668	0.0182695
a10	0	0	33.0242	0.248912	68.3413	32.5659	0.182941	62.8307	0	0.225675	0.0848652	4.14282	0.00446818	0.946859	1
A16	20.3966	19.832	17.0815	11.6989	10.3998	14.4252	18.66	10.9801	12.5936	14.6689	0.133421	4.08445	0.463595	0.497753	1
A2bp1	261.957	290.745	361.368	369.884	417.179	293.531	313.013	419.99	325.776	297.214	0.0454892	8.08675	0.116884	0.733261	1
a5	0	0	10.2489	0	31.1993	14.8623	0	26.8403	0	0	-0.00329036	2.31086	7.34434e-06	0.997844	1
a6	19.5968	18.7095	16.7019	23.1488	17.531	18.1408	14.0865	17.6902	17.8962	15.7972	0.20517	4.12068	2.81864	0.0967568	0.787981
Aac11	352.342	345.751	389.837	338.521	337.844	311.89	361.492	348.314	367.203	330.613	0.0368966	8.32881	0.29553	0.588086	1
Aatf	9.19848	11.0386	7.97135	6.96954	5.64558	7.21259	10.2447	7.32008	10.2737	11.2837	-0.173091	3.48866	0.610124	0.436857	1
Aats-ala	46.7923	56.1284	55.0403	51.7737	50.5131	55.7337	64.5783	52.7656	54.0199	56.4187	-0.123752	5.90138	1.62368	0.205965	0.886663
Aats-ala-m	18.7969	26.9416	20.1182	23.6467	20.7995	20.545	21.953	16.4702	25.1872	23.2445	0.0526683	4.61228	0.254313	0.615327	1
Aats-arg	18.7969	20.7675	25.0528	18.1706	23.1766	25.3534	23.5994	16.1652	24.5244	20.9877	-0.0701013	4.53628	0.358741	0.55076	1
Aats-asn	113.581	104.773	90.342	76.9139	70.7184	92.6709	118.546	94.8561	112.017	123.218	-0.248896	6.68002	4.65752	0.0336672	0.583576
Aats-asp	57.1906	57.9993	52.0036	42.564	54.9702	74.093	60.9195	51.5456	56.0083	67.7024	-0.233502	5.76218	5.07696	0.0267553	0.546441
Aats-cys	29.9951	24.3223	19.7386	24.6423	21.3938	23.6048	28.173	21.9603	23.1987	25.5012	-0.0355953	4.79195	0.10463	0.747117	1
Aats-gln	31.5948	30.8706	32.6446	22.651	21.9881	26.4462	32.3806	20.4352	30.4897	37.2363	-0.0846729	4.91984	0.322605	0.571506	1
Aats-glupro	74.3877	85.8764	81.6114	82.141	57.3472	69.9403	95.1295	88.451	77.8814	88.4645	-0.137667	6.55566	2.32603	0.130846	0.844393
Aats-gly	38.7936	31.2448	29.2283	31.8608	35.6563	33.8773	41.5277	30.1953	26.8442	37.2363	-0.0382316	5.2344	0.108539	0.742604	1
Aats-his	75.9875	76.5217	61.8729	61.7302	55.8616	81.087	70.7983	70.4558	71.916	68.3794	-0.126972	6.20688	2.14693	0.146453	0.877404
Aats-ile	146.376	143.502	154.872	152.832	142.328	136.602	142.145	136.947	142.175	138.564	0.0870122	7.46732	1.14138	0.288311	0.914753
Aats-leu	29.5951	25.0707	23.1549	25.389	27.3365	21.2006	30.0024	25.6203	21.2103	28.2093	0.0392065	4.80907	0.158632	0.898903	1
Aats-lys	199.567	176.056	154.113	125.452	119.152	152.339	192.82	149.452	201.829	194.08	-0.20336	7.85531	2.86159	0.0942896	0.783486
Aats-met	9.19848	10.2902	8.35094	11.45	9.50835	6.5569	10.9765	10.9801	12.2622	11.7351	-0.0848826	3.32866	0.24833	0.706651	1
Aats-phe	42.793	50.1413	41.7547	47.2933	33.8735	47.6468	43.723	51.5456	45.4032	50.0998	-0.136837	5.58631	2.72795	0.136026	0.855278
Aats-pro	5.59908	8.23216	10.2489	9.45866	6.83413	8.74254	9.69589	8.8451	8.28526	6.99592	-0.0709608	3.24011	0.195277	0.670704	1
Aats-ser	15.5974	17.774	18.2202	19.913	16.0453	17.2665	19.2088	18.3002	18.2276	18.5053	-0.0594748	4.14288	0.256992	0.632932	1
Aats-thr	116.781	119.179	104.766	99.0671	92.1122	101.632	129.522	114.376	121.959	115.771	-0.132814	7.0199	2.05213	0.155569	0.886663
Aats-trp	35.5941	31.9932	29.6079	25.389	28.8222	26.6647	32.3806	27.7553	30.1583	29.112	0.0464812	4.88986	0.182002	0.694131	1
Aats-tyr	59.5902	49.393	56.179	41.3194	43.679	49.8325	42.6253	49.1056	55.0141	54.6133	-0.0101765	5.75944	0.00947054	0.922698	1
Aats-tyr-m	13.9977	14.0321	18.2202	8.96084	10.3998	12.021	13.1718	13.1152	9.6109	12.8635	0.0870424	3.8417	0.309944	0.665956	1
Aats-val	64.7893	75.0249	64.1504	58.2455	48.7303	61.4163	73.3595	61.3057	68.9333	85.7564	-0.173399	6.21767	2.85119	0.0948806	0.785677
aay	193.568	145.934	189.035	176.728	221.663	173.102	135.011	138.472	153.112	165.871	0.273645	7.34883	3.179	0.0780711	0.742696
ab	57.5905	56.8767	56.5586	54.0139	54.0787	43.2756	50.8577	53.6806	56.0083	50.5511	0.136188	5.66372	2.05097	0.155686	0.886663
ABCB7	76.7874	63.4251	69.4646	63.2237	63.29	67.3175	72.4448	64.3557	69.9276	69.9592	-0.0379059	6.25171	0.239321	0.625926	1
abd-A	0	0	0	0	0.297136	0.218563	0.365883	0	0	0	-1.00434	-0.907285	0.521836	0.473348	1
Abd-B	0	0.187095	0.759176	0.497824	0.297136	0.218563	0	0	0	0.225675	1.59894	-0.982545	1.99394	0.163545	0.886663
Abi	45.1926	43.0318	47.0689	54.5118	54.9702	50.9253	54.5165	53.3756	51.7	49.6484	-0.0877252	5.77172	1.11576	0.293752	0.920976
Abl	169.572	180.359	151.835	190.916	168.773	130.264	180.197	168.972	183.27	160.906	0.0670184	7.48554	0.614256	0.435314	1
abo	12.398	12.1611	9.86929	8.96084	13.074	15.518	11.7082	13.1152	8.94808	10.381	-0.0865308	3.41129	0.308742	0.579876	1
Abp1	44.7926	56.8767	44.4118	43.5596	41.8962	42.1827	58.3583	32.9404	52.0314	45.3606	0.00582532	5.48132	0.00295162	0.956798	1
abs	25.1958	23.1997	20.8773	16.6771	16.6396	20.3264	24.6971	20.1302	22.2045	23.6958	-0.12243	4.50635	1.18402	0.279538	0.903891
ac	0	0	0	0	0	0	0	0	0	0	0	-1.28411	0	1	1
Ac13E	87.5856	111.134	97.1745	115.993	101.323	99.2278	97.8736	119.561	114.999	96.1374	-0.0343192	6.94107	0.0999939	0.752593	1
Ac3	250.759	268.855	300.634	321.346	303.97	255.501	268.741	293.718	284.681	246.888	0.100054	8.03186	1.3167	0.254325	0.886663
Ac76E	110.382	98.7859	123.746	124.954	142.625	138.788	103.545	129.321	113.342	104.036	0.027371	6.85816	0.0810966	0.776492	1
Ac78C	38.3937	35.548	28.8487	37.5857	37.142	36.063	38.6006	37.5154	33.141	34.0769	-0.0147482	5.22541	0.0192583	0.889948	1
Acam	0	0	0	0	0	0	0	0	0	0	0	-1.30545	0	1	1
ACC	478.721	605.625	522.693	434.85	480.766	644.106	571.509	396.81	611.452	594.201	-0.159686	8.90643	0.994382	0.321434	0.949672
AcCoAS	556.308	603.754	562.549	517.24	521.771	761.693	585.778	501.731	605.487	552.677	-0.123127	9.16212	1.50986	0.222467	0.886663
Ace	487.12	488.878	581.529	661.858	564.558	446.962	499.064	540.161	526.28	490.165	0.154062	8.88857	2.03048	0.157743	0.886663
Acer	64.3894	77.4572	89.5828	63.9704	56.4558	163.704	88.3607	72.5908	100.417	116.448	-0.625632	6.12843	6.66677	0.0114919	0.371808
Acf1	39.9934	33.1157	36.0609	45.5509	41.3019	36.5001	32.9294	30.5003	49.0487	34.9796	0.0962869	5.60763	0.431421	0.513023	1
achi	17.997	16.4643	14.0448	17.6728	12.7768	13.5509	17.3794	17.6902	11.5994	17.377	0.0207428	3.75878	0.0209329	0.90432	1
acj6	22.3963	26.1932	26.5712	32.1097	26.7422	24.6977	28.7218	30.8054	29.4955	25.7269	-0.047901	4.6953	0.157793	0.773538	1
Ack	133.578	144.437	118.811	125.701	124.203	134.416	158.427	151.892	139.524	149.397	-0.181007	7.19358	5.74606	0.0186615	0.468695
Ack-like	79.9868	79.141	70.2238	104.045	89.4379	81.3056	86.1654	88.146	84.1782	92.301	-0.0284977	6.48884	0.123283	0.752804	1
Acn	305.55	258.003	258.12	204.357	175.607	192.991	268.192	222.043	252.203	263.362	0.0016575	8.02257	0.000129726	0.990939	1
Acon	1276.99	1072.43	1080.31	1116.37	1289.87	1156.2	1088.32	1238.62	1022.4	1023.43	0.0778394	10.3481	0.78508	0.37803	1
Acox57D-d	9.99835	11.0386	11.3876	4.72933	9.50835	21.4192	10.6106	9.76011	10.2737	13.0891	-0.501309	3.01144	4.37439	0.0393923	0.615856
Acox57D-p	44.3927	30.1222	26.5712	21.6554	17.531	43.9312	25.9777	24.4003	23.5301	30.2404	-0.0987351	4.5567	0.344918	0.558522	1
Acp1	31.1949	6.7354	17.461	9.95649	10.994	5.02696	1.28059	5.49006	1.32564	1.12837	2.36799	5.03699	10.4711	0.00171462	0.136246
Acp24A4	0	0	0	0	0	0	0	0	0	0	0	-1.0255	0	1	1
Acp26Aa	0	0	0	0	0	0	0	0	0	0	0	-1.29083	0	1	1
Acp26Ab	0	0	0	0	0	0	0	0	0	0	0	-1.23446	0	1	1
Acp29AB	0	0	0	0	0	0	0	0	0	0	0	-1.30545	0	1	1
Acp32CD	0	0	0	0	0	0	0	0	0	0	0	-1.30545	0	1	1
Acp33A	0	0	0	0	0	0	0	0	0	0	0	-1.29789	0	1	1
Acp36DE	0	0.187095	0	0.497824	0.297136	0.218563	0	0	0	0	1.73933	-0.929386	1.94431	0.166915	0.886663
Acp53C14a	0	0	0	0	0	0.218563	0	0	0	0	-1.53268	-1.19275	1.29562	0.265234	0.886663
Acp53C14b	0	0.187095	0.379588	0	0	0	0.182941	0.305003	0.33141	0	-0.336564	-0.895409	0.0768273	0.782332	1
Acp53C14c	0	0	0	0.248912	0	0	0.548824	0.305003	0.33141	0	-1.70185	-0.966979	2.02265	0.158708	0.886663
Acp53Ea	0	0.187095	0	0	0	0.437127	0.365883	0	0	0	-1.41	-0.984184	1.49801	0.224434	0.886663
Acp54A1	0	0.187095	0	0	0	0	0	0	0	0	1.64737	-1.18854	1.97477	0.214216	0.886663
Acp62F	0	0	0	0	0	0	0	0	0	0	0	-1.13416	0	1	1
Acp63F	0	0.187095	0	0.248912	0	0.874254	0.182941	0	0.33141	0	-1.21989	-1.10316	1.30949	0.258261	0.886663
Acp65Aa	1.99967	1.12257	2.65712	0.746737	0.891408	0.437127	0.731765	1.52502	0.33141	0.677024	0.899062	2.47901	2.5418	0.114488	0.808604
Acp76A	0	0	0	0	0	0	0	0	0	0	0	-1.27716	0	1	1
Acp95EF	0	0	0	0	0	0	0	0	0	0	0	-1.14502	0	1	1
Acp98AB	0	0	0	0	0	0	0	0	0	0	0	-1.29789	0	1	1
Acph-1	17.1972	19.832	19.359	18.9173	19.9081	21.2006	21.5871	18.9102	22.5359	21.8904	-0.153431	4.23042	1.41517	0.23743	0.886663
Acsl	397.535	440.982	461.959	420.911	414.505	657.439	411.069	371.494	482.865	437.583	-0.144416	8.5732	1.42553	0.235735	0.886663
Act42A	27.5955	38.1673	37.9588	31.114	29.4165	42.1827	33.6612	32.3304	36.1237	39.0417	-0.155468	5.39883	1.10065	0.297023	0.924851
Act57B	1798.5	1515.28	1499.37	1348.86	1832.44	1404.93	1420.54	1694.29	1287.53	1380	0.153436	10.9548	0.728174	0.395814	1
Act5C	1016.63	944.079	846.861	918.237	746.703	822.017	1000.32	868.345	998.871	987.101	-0.0644248	9.9438	0.913826	0.341745	0.965721
Act79B	238.761	14.2192	61.4933	22.4021	88.2494	77.8086	23.4165	129.626	94.7833	14.6689	0.305884	8.36959	0.113719	0.73676	1
Act87E	239.96	130.218	185.239	123.958	166.099	130.045	130.803	155.857	136.21	105.616	0.356061	8.18575	1.70783	0.194704	0.886663
Act88F	3.99934	2.43223	29.6079	2.98695	65.3699	1.52994	2.1953	2.74503	2.31987	0.451349	3.49555	3.61698	28.835	6.45308e-07	0.000385024
Actbeta	147.576	133.773	163.602	172.496	169.962	158.24	148.731	181.172	158.746	150.976	-0.0187471	7.20421	0.024524	0.875921	1
Actn	308.749	229.191	248.251	199.877	222.258	158.677	195.015	217.467	196.526	191.372	0.331979	8.30717	4.37833	0.0393059	0.615856
Actn3	0	0	0	0.248912	0	0	0	0	0	0	1.67982	-1.25495	1.72043	0.214216	0.886663
ACXA	0	0	0	0	0	0	0	0	0	0	0	-1.28427	0	1	1
ACXB	0.799868	0.374189	0	0.746737	0.891408	1.09282	0.365883	0.610007	0.33141	0.451349	-0.0317874	-0.188097	0.00193063	0.965054	1
ACXC	0.399934	5.61284	5.31423	2.73803	3.86277	3.49701	2.74412	3.66004	2.65128	5.64187	0.0161766	1.58053	0.00213975	0.963211	1
ACXD	2.79954	4.67736	2.65712	2.98695	3.86277	3.71558	2.74412	3.66004	4.30833	3.6108	-0.0387421	1.66969	0.0149894	0.910927	1
ACXE	0	0	0	0	0	0	0	0	0	0	0	-1.27726	0	1	1
Acyp	0	0	0	0	0	0	0	0	0	0	0	-1.30545	0	1	1
Acyp2	23.1962	17.3998	18.2202	23.6467	17.531	16.3923	17.9283	16.4702	20.5474	20.3107	0.12318	4.2141	0.784787	0.378118	1
Ada	0.799868	1.87095	4.55506	1.9913	2.97136	3.71558	1.64647	2.44003	0.33141	2.48242	0.141763	1.22826	0.130726	0.779564	1
Ada1-1	0	0	0	0	0	0	0	0	0.33141	0	-1.55736	0.257103	1.73448	0.265234	0.886663
Ada1-2	3.99934	2.05804	3.0367	1.74239	2.67422	4.37127	2.01235	4.27005	3.64551	4.73917	-0.532719	1.92399	3.02337	0.085603	0.763515
Ada2a	21.1965	17.0256	20.8773	13.4413	16.3425	15.0809	17.7453	21.0452	22.8673	18.9567	-0.111738	4.3059	0.716315	0.399673	1
Ada2b	21.9964	29.1868	18.9794	23.8956	21.0967	34.3145	22.5018	22.5703	24.8558	24.5985	-0.149939	4.62074	0.874755	0.352226	0.97924
Adam	85.5859	88.6828	88.444	65.215	61.21	79.9942	81.043	65.5758	78.5442	83.4996	-0.00167478	6.35124	0.000182782	0.989244	1
AdamTS-A	31.5948	31.9932	41.3751	25.1401	41.8962	30.3803	33.4783	35.9904	31.8154	37.9133	0.0134263	5.25049	0.0129181	0.90977	1
Adar	275.155	303.654	344.286	424.146	424.904	311.671	274.046	363.259	309.537	284.35	0.201214	8.07901	1.71839	0.193343	0.886663
adat	9.19848	9.72892	16.7019	11.201	11.2912	10.0539	9.33001	7.93009	9.27949	12.4121	0.224644	3.48332	2.16646	0.185664	0.886663
ade2	75.1876	80.4507	56.5586	83.3856	60.3186	97.6978	65.3101	41.7855	65.2878	66.1227	0.0817158	6.24837	0.0936701	0.760292	1
ade3	122.78	121.424	98.3133	87.866	102.215	121.521	84.153	54.5956	95.7776	90.2699	0.251999	6.35801	0.664573	0.417172	1
ade5	151.575	184.288	185.619	171.252	158.968	313.638	145.072	113.156	196.195	174.221	-0.14625	7.20821	0.120623	0.729197	1
AdenoK	51.9914	48.0833	49.3464	37.8347	36.5477	67.5361	43.1742	41.4805	52.3628	46.0376	-0.168334	5.52498	1.21814	0.272763	0.896517
Adf1	47.5922	53.6961	50.4852	50.5292	55.5644	55.7337	54.3336	50.9356	54.3513	52.1309	-0.0510729	5.6231	0.465973	0.496656	1
Adgf-A	15.1975	21.1417	20.8773	16.4282	18.1253	25.7905	20.8553	29.5853	19.8846	23.6958	-0.375274	5.16835	3.1995	0.0771346	0.742696
Adgf-B	0	0	0	0	0	0	0	0	0	0	0	-1.27097	0	1	1
Adgf-C	19.5968	14.9676	16.3223	20.1619	19.9081	16.3923	18.66	17.6902	19.2218	14.2175	0.0760697	4.22786	0.331525	0.566918	1
Adgf-D	67.5889	66.4186	52.0036	46.5466	45.1647	78.2457	54.1506	44.5305	53.6885	54.839	-0.0436295	5.49283	0.0517377	0.820599	1
Adgf-E	0	0	0	0	0	0	0	0	0	0	0	-1.26896	0	1	1
Adh	6.79888	6.36122	9.11011	5.47607	6.23986	8.08685	5.48824	8.5401	7.95385	9.02699	-0.210269	2.74188	0.779811	0.379628	1
Adhr	0	0	0	0	0	0	0	0	0	0	0	-1.30545	0	1	1
AdipoR	415.931	467.549	454.746	391.29	391.625	754.699	390.763	385.219	451.712	424.945	-0.182931	8.40093	1.49691	0.224444	0.886663
Adk1	130.778	97.1021	121.468	97.8225	103.998	95.0751	104.277	96.3811	90.1436	93.655	0.19516	6.8587	3.38966	0.0690081	0.742696
Adk2	65.5892	66.0444	59.2157	51.5248	63.29	80.6499	65.8589	57.3407	67.6077	68.6051	-0.156192	5.98828	2.79978	0.0978622	0.790411
Adk3	11.1982	11.9741	9.11011	12.6945	11.8854	12.4581	15.1841	11.8951	12.2622	12.8635	-0.181241	3.90132	1.61681	0.206919	0.886663
AdoR	12.7979	11.0386	8.73052	10.9521	10.994	10.491	9.87883	16.4702	11.9308	13.0891	-0.16888	3.65462	1.54528	0.305503	0.935068
adp	29.9951	30.4964	39.0976	26.3847	22.2852	34.533	30.0024	25.6203	28.8327	30.2404	-0.0204837	4.9795	0.0392116	0.843491	1
AdSL	37.9937	34.0512	30.367	28.6249	29.1193	35.4073	32.9294	27.1453	36.4551	31.5945	-0.0333716	4.98217	0.0149882	0.902843	1
AdSS	157.974	138.263	141.586	116.74	169.07	144.908	143.975	141.522	127.924	148.494	0.0313289	7.13285	0.127801	0.721587	1
Ady43A	34.3943	33.4899	37.1996	38.5814	38.9248	33.8773	34.7589	33.8554	27.1756	35.8823	0.13612	4.94961	1.40321	0.239407	0.886663
Aef1	73.1879	80.6378	77.8155	89.8573	68.6384	83.9283	72.6277	81.1309	80.5327	76.7294	-0.0143808	6.19739	0.0366479	0.859091	1
aft	11.998	11.787	9.11011	12.6945	16.6396	11.1467	11.1594	12.2001	11.5994	13.0891	0.0797123	3.6584	0.256804	0.613604	1
Afti	86.7857	76.1475	95.6562	106.783	101.323	84.584	79.2136	98.8211	83.5154	81.2429	0.127553	6.49132	2.34987	0.128914	0.839183
Ag5r	1.59974	1.30966	2.65712	0.497824	177.39	1.09282	0.914707	2.13502	1.32564	1.57972	4.73107	5.38462	6.68871	0.0113614	0.368299
Ag5r2	0.399934	0	0	0	0	0	0	0	0.662821	0.225675	-1.07593	-0.242649	0.687694	0.409323	1
AGBE	114.781	108.328	102.109	75.4204	84.3866	113.434	117.631	96.0761	112.017	107.873	-0.176787	6.55845	1.88507	0.173281	0.886663
ago	79.9868	82.8829	78.1951	78.6563	76.9582	72.563	69.8836	77.4709	72.5789	70.8619	0.128183	6.43563	1.45328	0.231264	0.886663
AGO1	367.14	412.544	461.959	487.121	498	382.486	381.799	438.29	469.608	413.887	0.0950379	8.70067	0.919129	0.340355	0.964964
AGO2	296.351	291.68	305.568	279.031	259.103	281.073	272.4	291.888	282.03	298.116	0.00606922	8.02896	0.0113881	0.91526	1
AGO3	1.1998	2.05804	1.51835	4.23151	2.07995	0.874254	1.82941	1.52502	1.98846	1.12837	0.656873	1.72367	0.833476	0.363787	0.991953
agt	7.19881	8.98054	7.59176	7.46737	7.72554	7.43116	8.59824	4.88006	9.6109	9.92969	-0.0490971	3.02149	0.0756703	0.796982	1
Ahcy13	40.7933	36.6705	38.718	34.101	39.5191	47.8654	44.6377	28.0603	32.8096	43.3295	-0.0652444	5.14826	0.0699655	0.792011	1
Ahcy89E	17.5971	16.8385	9.11011	10.2054	12.4797	10.9282	12.0741	11.5901	9.6109	10.1554	0.285144	3.9297	2.90197	0.0920338	0.780973
AIF	30.7949	31.0577	41.3751	36.0923	29.1193	34.7516	34.7589	31.4154	32.4782	29.112	0.0464482	5.11289	0.173383	0.739486	1
Ak6	4.79921	2.80642	4.55506	2.98695	3.56563	5.68265	4.39059	3.05003	3.97692	5.86754	-0.356044	2.27996	1.63306	0.204673	0.886663
Akap200	156.374	165.579	157.529	141.133	101.026	132.012	148.548	111.326	174.653	155.264	-8.21461e-05	7.18903	3.76188e-07	0.999512	1
Akh	0.399934	0.374189	31.5058	0.497824	10.6969	0.218563	0.182941	0	0	0.225675	5.67193	-0.0962036	39.6646	1.18581e-08	1.65292e-05
AkhR	37.9937	46.9607	58.077	35.0966	41.0048	101.195	46.2842	46.0555	48.3859	48.5201	-0.413552	5.25501	2.58314	0.111623	0.808604
akirin	66.3891	102.341	124.505	98.5692	92.4093	112.56	79.3965	94.8561	97.766	91.8496	0.026054	6.41533	0.0615463	0.804652	1
Akt1	85.186	89.2441	104.007	91.3508	106.078	97.6978	84.153	92.1111	95.7776	86.2077	0.0620327	6.42941	0.506182	0.478696	1
al	0.799868	0.561284	0.379588	0.995649	0	0.874254	0	1.52502	0	0.451349	0.0227476	0.104309	0.00126124	0.971751	1
Alas	183.97	165.579	159.427	141.631	153.916	158.896	162.635	156.162	151.123	155.039	0.0359812	7.52471	0.186066	0.667276	1
alc	130.379	116.373	118.052	86.8704	96.8663	96.605	112.509	83.571	103.731	118.479	0.0865964	6.94057	0.54388	0.462809	1
ald	3.99934	3.74189	3.41629	3.48477	5.34845	5.02696	2.1953	3.66004	3.3141	4.51349	0.0957297	2.20971	0.123728	0.725875	1
Ald	1460.96	1417.43	1644	1616.93	1741.22	1670.7	1341.33	1656.78	1420.76	1345.7	0.0839245	10.6658	0.699187	0.405343	1
Aldh	635.895	659.134	672.25	524.956	522.365	899.17	636.636	562.121	577.98	637.757	-0.137117	9.09651	1.55167	0.216227	0.886663
Aldh-III	161.173	170.63	166.639	153.081	142.031	206.761	183.856	168.667	162.722	153.007	-0.141771	7.27405	3.39468	0.0688064	0.742696
Alg10	6.79888	7.48378	9.11011	8.46302	8.31981	12.2395	8.23236	8.8451	7.62244	10.1554	-0.237421	3.09181	1.47953	0.227132	0.886663
Alg-2	45.9924	38.5415	41.7547	51.5248	57.0501	55.9522	40.43	44.8355	38.775	42.8782	0.0724975	5.25046	0.152562	0.697052	1
Alh	127.579	124.605	112.358	115.993	123.311	94.2008	122.388	128.406	125.273	115.545	0.0452397	6.99064	0.253085	0.61618	1
alien	53.1912	55.5671	50.8648	57.0009	48.4332	55.078	56.163	50.9356	59.3224	58.4497	-0.0768552	5.71128	0.676418	0.413067	1
ALiX	162.773	151.547	132.856	132.172	131.631	135.509	155.317	123.221	148.14	151.879	-0.0074856	7.20162	0.0087135	0.925843	1
Alk	183.97	205.804	242.557	282.764	263.56	194.74	214.224	253.153	233.976	209.2	0.0944869	7.92558	0.73471	0.393711	1
AlkB	4.39928	4.86446	6.453	10.2054	5.05131	6.5569	5.3053	5.49006	8.61667	6.31889	-0.0354024	2.43405	0.0227569	0.963052	1
alph	120.78	114.502	136.272	114.997	104.592	108.845	126.961	92.7211	119.971	125.701	0.0387168	6.87359	0.205726	0.873318	1
alpha4GT1	15.5974	30.4964	28.8487	32.3586	26.148	43.057	30.0024	29.8903	31.484	25.2756	-0.244552	4.83614	4.1303	0.0451654	0.649053
alpha4GT2	0	0.187095	0	0	0	0.218563	0	0	0	0	0.114439	-1.23499	0.0106111	0.91854	1
alpha-Cat	188.769	171.94	193.59	188.427	189.573	172.009	190.259	178.122	188.572	182.571	0.0317366	7.629	0.115312	0.734993	1
alpha-catenin-related	97.9839	101.218	86.9257	94.5866	72.5012	88.2996	105.008	80.2159	93.7891	94.5577	-0.0277106	6.6393	0.129474	0.719848	1
alphaCOP	116.381	102.902	91.8603	80.6476	84.3866	111.249	107.204	92.7211	115.662	108.55	-0.171256	6.68801	5.04298	0.0272548	0.549164
alpha-Est1	43.9928	50.7026	43.273	52.5205	43.0847	57.7007	57.2606	52.1556	51.0372	51.4538	-0.203542	5.76452	2.51897	0.116105	0.809324
alpha-Est10	16.3973	18.5224	20.4978	15.1836	15.7482	25.7905	22.3188	26.8403	26.1814	23.4702	-0.526511	4.06219	9.4203	0.00286027	0.177199
alpha-Est2	22.3963	30.1222	20.1182	21.1575	14.5597	61.4163	20.3065	14.0302	31.1526	28.2093	-0.511104	4.11055	2.25847	0.1365	0.855278
alpha-Est3	24.7959	17.0256	20.8773	17.6728	27.3365	19.4521	19.0259	18.6052	17.8962	20.7621	0.154786	3.90687	0.93292	0.336777	0.962295
alpha-Est4	2.3996	2.61932	5.31423	3.23586	2.37709	2.18563	2.37824	3.35504	2.65128	2.7081	0.254283	1.25973	0.623455	0.431909	1
alpha-Est5	3.99934	5.23865	3.41629	3.23586	8.02267	10.0539	6.40295	3.66004	5.30256	7.22159	-0.455078	2.35062	2.10428	0.150476	0.881926
alpha-Est6	0	0	0	0.248912	0	0	0	0	0	0	1.67986	-1.20678	1.79728	0.214216	0.886663
alpha-Est7	124.779	158.282	144.243	108.028	138.168	233.207	131.535	114.071	151.123	156.618	-0.224446	6.97623	1.97621	0.163344	0.886663
alpha-Est8	82.7864	78.7668	81.2318	94.0888	74.284	87.8625	82.5065	75.9459	75.2301	85.5307	0.0128676	6.04423	0.0133098	0.908419	1
alpha-Est9	108.782	96.5408	120.709	97.0758	116.774	137.258	100.984	126.576	105.057	111.709	-0.109934	6.67177	1.38896	0.241788	0.886663
alphagamma-element:CR32865	0	0	0.379588	0	0.297136	0.218563	0	0	0	0	0.947903	-0.860855	0.592316	0.476197	1
alphaKap4	0	0	0	0	0	0	0	0	0	0	0	-1.30545	0	1	1
alpha-Man-I	169.972	179.985	209.533	220.785	212.452	190.15	172.148	229.363	204.812	181.217	0.0237256	7.51135	0.0726802	0.788111	1
alpha-Man-Ib	97.9839	80.8249	98.3133	110.766	99.2434	94.8565	88.5436	93.3311	85.8353	89.8185	0.104903	6.69664	1.98603	0.162314	0.886663
alpha-Man-II	49.1919	43.0318	40.9955	40.5727	47.5418	38.03	41.5277	40.8705	50.043	46.9403	0.0261609	5.58535	0.0956534	0.757847	1
alpha-Man-IIb	153.975	149.489	145.003	166.522	164.019	127.86	139.401	154.637	141.181	143.303	0.142262	7.24135	3.26355	0.0742861	0.742696
alphaSnap	520.314	480.085	492.326	509.274	466.206	479.747	476.013	482.516	487.505	498.515	0.0257625	8.8774	0.141788	0.707425	1
alpha-Spec	641.894	700.108	645.3	630.495	530.388	515.372	694.994	596.892	689.333	671.382	-0.00885643	9.43372	0.00631421	0.936847	1
alphaTry	0	0	0.379588	0	687.276	3.49701	0	1.22001	10.9365	0.451349	5.6006	3.80672	25.6626	3.08188e-06	0.00114557
alphaTub67C	1.99967	5.79993	2.27753	6.96954	5.34845	2.18563	2.74412	2.44003	3.3141	2.03107	0.904644	2.91972	2.81048	0.0972332	0.788593
alphaTub84B	1035.43	989.356	854.073	867.21	817.718	895.891	1056.85	940.936	941.205	1015.99	-0.0881308	9.96489	1.67301	0.199273	0.886663
alphaTub84D	144.376	123.857	111.599	138.644	117.666	132.449	128.059	138.167	124.942	146.463	-0.075378	7.14797	0.783427	0.37853	1
alphaTub85E	9.59842	1.30966	1.89794	0.497824	0.891408	2.62276	1.64647	6.71008	1.65705	0.902699	-0.0388253	1.55942	0.00451325	0.946592	1
Alr	15.1975	15.3418	14.4243	12.4456	13.3711	20.1078	15.1841	16.1652	9.6109	15.5716	-0.128166	4.03777	0.715038	0.400091	1
alrm	78.3871	67.167	61.1137	100.312	77.8496	68.1918	59.0901	49.4106	50.7058	55.2903	0.44265	5.76075	6.94731	0.00993573	0.352836
alt	112.781	106.457	128.301	97.3247	86.4666	92.2337	119.827	91.501	132.896	114.191	-0.0536867	6.7302	0.143957	0.705302	1
aly	0	0	0	0	0	0	0	0	0	0.225675	-1.53584	-1.19464	1.32435	0.265234	0.886663
Ama	1.99967	0.935473	2.27753	2.24021	2.67422	0.437127	1.09765	0.91501	0.662821	1.57972	1.03668	0.549713	2.83869	0.0955963	0.787615
amd	3.19947	4.86446	5.31423	3.23586	8.91408	4.58983	4.20765	3.35504	2.98269	3.38512	0.43995	3.00778	2.82101	0.0966187	0.787981
amn	0.399934	0	0	0.248912	0.297136	0	0	0.305003	0	0.225675	0.685684	-0.866817	0.362576	0.548717	1
Amnionless	3.99934	3.74189	3.79588	3.48477	3.86277	3.27845	5.3053	4.88006	4.30833	5.41619	-0.304362	2.53841	1.80665	0.182398	0.886663
amon	355.541	354.17	348.462	404.482	374.688	385.764	373.566	402.605	389.739	372.815	-0.0663961	8.41766	0.934444	0.336385	0.962295
amos	0	0	0	0	0	0	0	0	0	0	0	-1.26955	0	1	1
AMPdeam	337.544	341.073	343.907	315.123	334.872	318.665	319.05	310.494	328.759	338.286	0.0501037	8.27517	0.964718	0.328719	0.958068
Amph	235.161	243.597	238.381	275.546	269.799	239.764	225.75	258.338	228.342	206.267	0.125017	7.90393	2.59153	0.111052	0.808604
AMPKalpha	181.57	196.636	188.655	178.968	194.624	208.947	194.65	194.592	178.962	186.633	-0.035447	7.73229	0.31497	0.576086	1
Amun	126.379	129.657	115.774	107.032	95.6778	85.2397	124.583	107.056	122.29	134.502	0.00217231	6.95354	0.000384039	0.98441	1
amx	14.7976	9.54182	11.0081	8.46302	8.91408	11.3653	10.0618	10.3701	12.2622	13.7662	-0.155793	3.53417	0.955727	0.330971	0.959405
Amy-d	9.99835	10.8515	12.1468	7.21845	452.241	15.0809	11.3424	6.10007	27.8385	9.02699	2.85183	4.18998	12.8757	0.000549027	0.065597
Amy-p	2.79954	0	4.93464	2.24021	467.098	4.58983	5.48824	0.305003	5.30256	2.03107	4.70242	4.05434	15.811	0.000144081	0.0236278
Amyrel	0	0	0	0	0	0	0	0	0	0	0	-1.10889	0	1	1
ana	32.3947	27.5029	25.4324	35.8434	29.4165	29.2875	26.7094	28.9753	24.193	25.9526	0.155856	4.602	1.58351	0.211616	0.886663
ana1	22.7962	22.8255	26.5712	16.4282	21.9881	13.1138	21.5871	15.2502	16.2391	24.8242	0.263359	4.4177	3.12534	0.0805829	0.749159
ana2	2.79954	2.43223	0.379588	2.24021	2.07995	1.52994	2.1953	0.610007	1.98846	1.12837	0.415285	1.6057	0.767652	0.383352	1
ana3	4.79921	5.05155	3.41629	5.72498	3.2685	4.1527	4.57353	3.35504	2.31987	4.06214	0.257283	2.39249	0.553658	0.458828	1
Ance	31.9947	20.9546	20.1182	20.9086	27.6336	20.9821	27.2583	22.2653	23.8615	19.8594	0.0771185	4.75568	0.37035	0.695718	1
Ance-2	0	0	0	0	0	0	0	0	0	0	0	-0.986552	0	1	1
Ance-3	20.3966	23.1997	28.0895	25.1401	34.7649	27.9761	29.8194	28.0603	27.1756	30.0147	-0.122811	5.00663	0.686964	0.409462	1
Ance-4	33.9944	45.0898	39.0976	18.1706	21.0967	72.563	37.32	24.0953	46.7289	47.166	-0.537276	4.81059	1.53482	0.218716	0.886663
Ance-5	20.7966	22.6384	27.7099	16.4282	10.3998	58.3564	34.9418	20.4352	41.4263	47.843	-1.06533	4.95008	23.8318	4.71455e-06	0.00153243
Andorra	0	0	0	0	0	0	0	0.305003	0	0.225675	-2.28516	-0.947028	2.72917	0.115122	0.808604
angel	8.79855	8.23216	8.73052	6.96954	6.23986	8.52397	8.78118	6.71008	8.94808	9.25266	-0.128527	3.31618	0.48669	0.487264	1
Ank	581.504	629.386	698.822	797.266	786.816	723.008	660.235	795.144	721.149	660.099	-0.0265073	9.40695	0.0489785	0.825368	1
Ank2	1562.94	1536.42	1571.49	1500.44	1243.81	1088.66	1582.99	1348.12	1698.15	1606.13	0.0178504	10.5443	0.0262302	0.871714	1
Anp	0	0	0	0	0	0	0	0	0	0	0	-1.16203	0	1	1
Ant2	7.19881	4.11608	1.13876	2.48912	5.34845	4.80839	4.75647	2.13502	1.65705	4.28782	0.129172	2.25148	0.264553	0.788117	1
antdh	4.39928	12.1611	22.0161	7.71628	31.7936	20.9821	6.58589	20.4352	8.94808	10.1554	0.222874	4.10634	0.142042	0.707175	1
Antp	1.99967	2.05804	3.79588	1.9913	4.75418	1.52994	1.82941	4.88006	2.98269	1.8054	0.195443	1.83749	0.228577	0.633778	1
antr	0	0	0	0.248912	0	0.65569	0.365883	0	0	0.225675	-1.91076	-0.352539	3.67147	0.0714901	0.742696
AnxB10	155.174	154.914	109.701	98.8181	99.2434	132.449	156.598	132.677	142.506	148.043	-0.205629	7.11947	3.05952	0.0837849	0.758113
AnxB11	60.79	66.9799	64.1504	71.4378	65.0728	89.8296	69.3348	81.7409	75.893	83.7253	-0.283655	5.98859	10.7288	0.00151446	0.127298
AnxB9	231.562	234.991	236.483	210.331	207.104	262.713	244.227	255.288	251.872	275.549	-0.203178	7.88553	8.45271	0.00462167	0.231457
aop	49.5918	65.1089	67.1871	72.6824	74.8783	61.8534	51.7724	69.8458	60.6481	57.7727	0.132966	5.8666	1.93285	0.167986	0.886663
aos	26.7956	27.8771	23.914	28.6249	27.6336	27.1019	27.99	26.5353	27.1756	22.3418	0.0445347	4.62307	0.177889	0.674232	1
Aos1	17.5971	17.0256	14.4243	16.1793	17.531	18.7965	16.2818	15.5552	17.8962	16.2486	-0.0326235	4.076	0.0375161	0.846869	1
ap	69.9885	83.2571	105.146	88.8617	79.9296	137.695	84.8848	92.1111	98.0974	84.4023	-0.219455	6.32417	3.62532	0.0602054	0.70999
AP-1-2beta	120.78	134.708	108.942	119.976	112.912	114.309	128.059	128.101	130.244	126.152	-0.0672356	7.1575	0.751848	0.388272	1
AP-1gamma	139.577	143.876	143.864	164.033	160.453	158.896	143.426	162.262	136.21	150.074	0.0024275	7.18281	0.00113104	0.973248	1
AP-1mu	69.9885	60.8057	53.5219	53.0183	47.2446	55.078	66.2248	51.2406	64.9564	68.1538	-0.106742	5.97381	1.64197	0.203453	0.886663
AP-1sigma	96.7841	108.702	119.57	131.426	142.328	130.045	105.374	126.881	107.046	105.39	0.0607761	6.64705	0.268005	0.605985	1
AP-2alpha	229.962	222.455	230.41	251.899	237.115	207.417	227.579	229.058	240.272	214.391	0.0674713	7.9051	1.23867	0.268787	0.891887
AP-2mu	97.184	91.6763	76.6768	94.8356	94.4892	104.255	82.5065	90.891	84.841	93.655	-0.0035597	6.75881	0.002473	0.96468	1
AP-2sigma	55.1909	48.0833	48.9669	52.5205	46.0561	51.581	52.6871	50.6306	47.7231	56.4187	-0.0504051	5.85736	0.300851	0.584751	1
Apc	191.169	194.953	184.859	206.348	196.11	141.629	209.285	180.257	201.497	187.536	0.0819005	7.69237	0.763228	0.38472	1
APC10	6.79888	7.29669	4.55506	7.46737	6.83413	12.4581	9.14707	7.32008	5.96539	7.89861	-0.377053	3.01766	4.52577	0.0362123	0.600329
Apc2	1.1998	2.99351	1.89794	2.98695	1.78282	2.4042	1.64647	1.22001	0.994231	2.93377	0.259394	1.89929	0.332233	0.565832	1
APC4	7.59875	11.4128	5.69382	9.70758	8.31981	9.83535	10.4277	6.40507	12.5936	11.0581	-0.200977	3.47742	1.28644	0.297229	0.925166
APC7	0	2.43223	0.759176	0.995649	1.48568	0.218563	0.182941	0.610007	0.662821	0.225675	1.81004	1.33568	4.21701	0.0430171	0.632121
ApepP	8.39862	14.9676	14.4243	13.1923	16.9368	18.3593	12.9888	14.9452	15.2449	17.377	-0.201367	3.92877	1.42302	0.236143	0.886663
Apf	23.1962	9.72892	15.9427	13.9391	12.4797	10.7096	12.9888	10.6751	12.925	9.25266	0.379506	3.66228	5.6608	0.0195304	0.472866
aph-1	13.1978	10.4773	14.0448	8.46302	10.3998	18.3593	13.3547	10.6751	14.2506	13.3148	-0.333022	3.69076	4.7996	0.0311345	0.573092
Aph-4	72.788	62.8638	66.4279	58.9922	49.0274	55.2965	60.0048	51.8506	56.6712	61.3835	0.115308	5.88498	0.989904	0.32252	0.951825
aPKC	185.969	221.333	214.847	262.851	228.795	202.827	206.907	238.818	237.953	225.9	0.00410203	7.76923	0.0020059	0.964379	1
Aplip1	201.567	161.276	179.925	174.239	151.539	164.797	193.003	174.767	180.619	171.964	-0.0292345	7.53481	0.231907	0.63132	1
Apoltp	164.773	189.34	245.593	151.339	125.689	312.546	205.626	140.912	204.812	238.538	-0.333892	7.65255	1.36628	0.245638	0.886663
app	281.554	282.326	306.707	349.224	354.78	288.285	306.061	320.559	321.468	277.354	0.0575368	8.19102	0.355939	0.552316	1
APP-BP1	26.7956	28.2513	30.367	28.1271	26.148	22.9492	28.7218	21.9603	21.8731	24.8242	0.207415	4.86748	4.10401	0.0458393	0.651448
Appl	964.241	1043.24	1133.45	1069.08	898.242	736.996	1019.72	933.921	1073.77	976.494	0.107812	9.98094	1.23572	0.269355	0.89319
Aprt	8.79855	9.91601	9.4897	9.45866	10.1026	13.3324	8.96413	9.45511	8.61667	10.6067	-0.0958161	3.34876	0.277102	0.599944	1
Aps	183.97	183.914	190.933	179.715	167.585	153.213	169.77	161.652	180.95	166.322	0.12342	7.233	2.23235	0.138759	0.860586
apt	27.5955	20.5804	22.3957	18.4195	18.1253	15.9551	21.5871	19.5202	21.5417	17.8283	0.14187	4.44823	0.963214	0.329094	0.958068
AQP	35.5941	25.8191	31.1262	30.6162	39.222	40.4342	27.6241	32.6354	25.85	28.6607	0.0544312	5.15248	0.0715165	0.789773	1
aqrs	0	0	0	0	0	0	0	0	0	0	0	-1.27722	0	1	1
ara	8.39862	9.16763	9.4897	7.46737	14.2625	7.86828	8.4153	8.5401	6.95962	8.34996	0.274377	3.05996	2.08205	0.152624	0.886663
aralar1	109.182	144.25	139.688	139.142	129.254	201.734	138.852	125.661	161.397	144.883	-0.222184	7.45101	3.91577	0.0509915	0.678766
Arc1	317.948	255.197	306.328	230.493	271.879	340.522	332.77	335.809	369.191	316.17	-0.295598	7.63497	3.7347	0.05654	0.690829
Arc2	7.19881	5.61284	4.17547	7.46737	4.1599	4.1527	4.02471	6.71008	5.30256	6.09322	0.14507	2.67511	0.320269	0.5729	1
Arc42	29.9951	30.8706	25.0528	19.913	18.4224	44.3684	30.5512	23.7903	36.4551	36.3336	-0.467704	4.52978	9.60313	0.00261485	0.167581
aret	74.3877	76.8959	87.6848	90.604	99.2434	93.7637	66.5906	92.1111	90.1436	69.7335	0.0601511	6.1867	0.237819	0.62701	1
Arf102F	78.787	83.6313	108.183	109.521	108.455	126.985	84.5189	104.616	99.7545	91.3983	-0.0534924	6.379	0.169008	0.682004	1
Arf51F	92.3848	101.405	109.701	115.744	107.266	123.488	98.2395	111.936	101.412	100.425	-0.0234204	6.51724	0.0520661	0.820041	1
Arf79F	247.559	257.629	294.56	269.572	237.709	274.297	266.911	252.238	271.094	273.292	-0.0339672	7.93139	0.199271	0.656417	1
ArfGAP1	45.9924	47.3349	42.5139	39.577	35.3592	43.057	48.1136	39.3455	46.3974	54.3876	-0.136004	5.60212	1.2537	0.265923	0.88692
ArfGAP3	38.7936	48.8317	67.5667	49.2846	51.4045	61.8534	49.5771	48.4956	62.968	53.2592	-0.11007	5.65245	1.20921	0.274516	0.897244
Arfip	39.1935	36.6705	40.2363	32.6075	38.6277	34.3145	40.0642	38.7354	37.118	39.4931	-0.0229636	5.17456	0.0732727	0.78727	1
Arfrp1	17.1972	11.787	12.5264	11.201	13.6683	15.7366	13.9035	16.1652	14.5821	19.6337	-0.285639	3.69199	3.50908	0.0643845	0.732437
arg	3.59941	2.99351	4.17547	1.74239	1.48568	5.68265	1.46353	1.22001	4.30833	3.38512	-0.230014	1.98033	0.268203	0.605852	1
Argk	1903.29	1812.76	1653.11	1692.6	1792.92	1623.93	1718.73	1795.25	1536.42	1594.84	0.0986699	11.2158	0.954173	0.331362	0.960005
ari-1	142.776	138.824	141.966	143.871	135.791	121.958	136.108	123.831	137.204	123.444	0.130132	7.13816	3.69537	0.0578294	0.695909
ari-2	59.5902	52.9478	43.6526	49.0357	48.7303	43.4941	54.5165	45.4455	45.4032	43.5552	0.12508	5.7276	2.41014	0.124175	0.828339
Ark	68.3887	75.7733	78.5747	78.4073	91.815	74.7487	80.6771	80.5209	73.5731	71.5389	0.0452453	6.31363	0.256525	0.613796	1
Arl1	18.7969	21.5159	18.9794	19.1662	16.3425	24.9162	20.4894	22.5703	20.216	17.8283	-0.155471	4.3596	1.69383	0.196525	0.886663
Arl2	11.5981	11.4128	11.7672	12.9434	11.2912	10.7096	14.0865	12.2001	11.5994	13.9918	-0.0890334	3.56968	0.31823	0.574122	1
Arl4	120.78	94.8569	116.913	125.203	128.066	146.875	111.045	120.476	108.703	110.129	-0.0304853	6.69425	0.0435712	0.83514	1
Arl6	2.3996	1.87095	2.65712	2.98695	1.78282	1.09282	0.731765	3.05003	0.33141	0.902699	0.953453	0.782274	4.00969	0.0483473	0.666104
arm	489.919	471.104	424.379	460.488	434.71	437.127	477.843	472.755	429.839	459.022	0.00247972	9.01024	0.00190559	0.965281	1
armi	13.9977	7.10959	6.07341	8.46302	9.21122	5.24552	9.14707	7.01508	9.94231	9.47834	0.114682	3.43322	0.202147	0.654109	1
Arp1	97.9839	78.7668	68.3258	71.4378	76.3639	87.4254	85.0677	83.266	82.5212	82.5969	-0.102144	6.47141	2.20313	0.141338	0.864092
Arp10	25.5958	27.1287	22.0161	17.4239	20.2052	22.0749	23.5994	19.8252	21.5417	27.9837	-0.0381856	4.72694	0.0884792	0.766827	1
Arp2	76.3874	76.5217	71.3626	79.6519	80.821	82.8355	81.9577	83.266	82.5212	86.2077	-0.114408	6.16738	2.46985	0.119672	0.816783
Arp3	37.1939	35.548	32.6446	33.3542	35.6563	39.1228	34.5759	40.5655	38.1122	40.3958	-0.143042	5.28579	2.86457	0.0941212	0.783486
Arp5	18.7969	16.2772	13.2856	11.6989	7.4284	13.3324	16.8306	10.0651	14.5821	16.6999	-0.0996327	4.0509	0.307626	0.580561	1
Arp53D	0	0	0	0	0	0	0	0.305003	0	0	-1.56219	-1.19604	1.5604	0.265234	0.886663
Arp6	23.996	18.1482	21.2569	13.4413	12.4797	13.3324	17.1965	16.7752	20.5474	19.1823	0.0253285	4.17904	0.0361235	0.934945	1
Arp8	7.19881	5.98703	5.69382	6.96954	6.23986	6.99403	9.33001	6.10007	6.62821	10.6067	-0.325808	3.01342	2.96817	0.0884637	0.772706
Arpc1	101.983	87.3732	74.7788	72.4335	60.0215	80.4313	94.9466	84.181	85.5039	102.908	-0.179181	6.56573	2.62961	0.108499	0.808604
Arpc2	46.7923	40.7866	49.726	44.5553	48.7303	41.7456	42.2594	38.1254	38.4436	47.3917	0.141397	5.46517	1.00814	0.318128	0.948373
Arpc3A	10.3983	14.7805	10.2489	16.1793	19.9081	15.9551	14.2694	11.5901	15.2449	17.6026	-0.0470717	4.00816	0.13751	0.815279	1
Arpc3B	1.1998	1.12257	2.27753	0.746737	3.2685	1.09282	1.28059	2.13502	2.31987	1.57972	0.0373486	0.919506	0.00761495	0.93262	1
Arpc4	31.5948	28.9997	23.5345	22.4021	16.6396	22.0749	32.5636	23.7903	33.4724	28.8864	-0.193925	4.74355	1.95143	0.165979	0.886663
Arpc5	17.1972	17.3998	17.8406	14.188	16.0453	16.1737	18.843	14.9452	18.8904	21.4391	-0.133636	4.16825	0.847389	0.359832	0.988889
arr	54.791	48.6446	53.9015	48.0401	57.6444	48.9582	56.3459	57.3407	63.6308	55.7417	-0.1013	5.78432	1.24613	0.267361	0.889449
Arr1	5451.5	4890.09	4163.32	4337.54	3557.01	4478.58	5311.88	4706.81	4806.77	5128.46	-0.125371	12.5268	1.97752	0.163207	0.886663
Arr2	10609.5	9020.58	8017.28	7131.58	7034.4	7370.83	9430.99	7840.42	8448.31	8940.33	-0.00752636	13.0717	0.00690649	0.933958	1
Ars2	130.379	138.45	129.44	112.508	108.157	126.111	147.268	116.206	135.878	137.887	-0.10096	7.07035	1.68601	0.197553	0.886663
Art1	23.1962	20.9546	18.5998	19.4152	16.9368	24.9162	26.1606	20.7402	20.5474	22.1161	-0.21651	4.50151	1.87721	0.17417	0.886663
Art2	1.1998	1.49676	1.89794	1.9913	2.07995	1.31138	0.914707	1.22001	0.33141	1.57972	0.654922	0.830367	3.17746	0.100228	0.797856
Art3	11.998	9.35473	12.906	10.2054	9.80549	11.1467	12.2571	7.62509	13.5878	11.7351	-0.0747689	3.50627	0.156679	0.6932	1
Art4	21.5964	22.6384	22.0161	20.9086	25.2566	20.3264	21.0383	22.2653	19.5532	19.8594	0.126251	4.58906	0.85459	0.357809	0.985359
Art6	0	0	0	0	0	0	0	0	0	0	0	-1.30545	0	1	1
Art7	11.998	12.3482	7.59176	5.97389	9.21122	11.8024	10.7935	9.45511	8.61667	14.8945	-0.245299	3.53121	1.91006	0.170488	0.886663
Art8	3.99934	3.5548	2.27753	0.497824	1.78282	4.80839	2.37824	2.74503	3.97692	3.83647	-0.55758	1.92242	3.63971	0.0597087	0.705651
Art9	0	0	0	0	0	0	0	0	0	0	0	-1.30545	0	1	1
aru	57.1906	50.8897	54.6607	41.8173	40.1134	39.7785	49.3942	44.5305	44.409	50.3255	0.0922068	5.76068	0.516518	0.474253	1
arx	5.59908	4.86446	4.17547	3.23586	2.97136	5.02696	5.67118	4.27005	6.2968	6.31889	-0.412844	2.207	2.56318	0.112996	0.808604
ARY	0	0	0	0	0	0	0	0	0	0	0	-1.30545	0	1	1
Asap	157.574	141.256	143.105	134.662	136.683	125.674	138.852	144.267	137.535	134.502	0.0664619	7.20559	0.911061	0.342472	0.966515
Asator	612.699	561.471	621.765	733.793	686.978	581.816	601.145	683.513	693.642	588.108	0.0314118	9.23876	0.108008	0.743212	1
Asciz	7.19881	8.41926	5.69382	5.97389	5.94272	7.43116	8.59824	7.32008	6.2968	5.19052	-0.0612764	3.11856	0.089087	0.770716	1
ase	0	0	0	0	0.297136	0.218563	0	0	0	0	0.16409	-1.14381	0.0120047	0.913218	1
asf1	17.5971	16.0901	14.0448	9.70758	12.1826	12.021	15.3671	14.0302	15.5763	14.4432	-0.0424813	3.97402	0.0685649	0.794056	1
ash1	62.7897	68.8508	67.5667	71.6867	62.6957	59.0121	65.6759	64.9657	74.8987	62.0605	0.0346965	6.21808	0.147585	0.701789	1
ash2	28.3953	40.7866	31.5058	38.5814	36.8449	44.1498	35.4906	31.4154	33.8038	37.6877	-0.0447672	5.04346	0.246454	0.784829	1
asl	5.59908	5.42574	4.93464	3.48477	2.07995	2.18563	3.11	2.44003	3.3141	2.03107	0.714672	2.14875	3.55918	0.062546	0.721652
asp	3.19947	6.54831	1.13876	2.48912	1.18854	0.218563	0.365883	0	1.98846	1.12837	2.13889	1.92596	7.015	0.00959441	0.345874
asparagine-synthetase	83.5862	77.083	74.0197	82.8878	68.0441	90.2667	85.7995	78.0809	81.5269	86.8848	-0.133473	6.30438	2.14368	0.146755	0.87788
Asph	133.578	110.386	136.272	107.779	122.42	95.7308	109.765	107.666	98.4289	91.1726	0.276633	7.07952	5.50942	0.0211799	0.492049
ASPP	78.3871	69.7863	65.2891	61.7302	52.5931	57.4822	73.5424	58.5607	64.625	68.6051	0.0178747	6.11922	0.025506	0.873482	1
asrij	24.7959	20.9546	19.359	19.4152	20.5024	31.2546	21.953	17.0802	23.1987	27.9837	-0.220799	4.47681	3.06421	0.0835524	0.758113
ast	10.3983	8.04507	10.6285	7.71628	7.72554	11.3653	8.4153	10.3701	8.61667	7.67294	-0.0791724	3.27704	0.223442	0.637611	1
AstA	75.1876	72.2185	56.179	67.4552	70.7184	74.9672	69.7007	83.266	70.5904	78.3091	-0.138733	5.89274	2.005	0.160345	0.886663
AstA-R1	13.5978	11.4128	21.6365	19.913	16.9368	19.015	11.7082	21.9603	19.5532	16.6999	-0.0880408	3.91524	0.214288	0.644581	1
AstA-R2	0.399934	1.12257	1.51835	2.48912	2.07995	0.874254	0.914707	0.610007	1.98846	1.57972	0.401868	0.916377	0.657219	0.419751	1
AstC	141.177	131.153	152.974	136.155	145.894	161.737	146.902	162.262	161.065	163.163	-0.169592	6.88144	3.1634	0.0787926	0.742696
AstCC	0.399934	1.30966	0.379588	1.24456	0	3.71558	0.365883	0.91501	0.662821	0.677024	-0.783211	0.365133	2.18962	0.142549	0.867959
AstC-R1	80.7867	66.4186	83.889	102.303	76.3639	69.5032	70.4324	88.451	68.9333	76.0524	0.13418	5.60065	1.42736	0.235437	0.886663
AstC-R2	17.997	12.9095	14.4243	15.9304	17.531	17.4851	13.9035	14.3352	14.5821	14.4432	0.0648034	4.10071	0.186229	0.737832	1
asun	9.59842	8.41926	7.21217	10.2054	8.61694	9.39823	10.2447	10.3701	9.27949	10.1554	-0.164562	3.42913	1.40674	0.277666	0.90233
Asx	82.7864	84.0055	75.538	90.604	88.5465	66.0061	81.5918	83.571	86.1667	78.9861	0.0921781	6.38856	0.960898	0.329673	0.958172
Atac1	5.19914	5.23865	6.07341	5.22716	5.94272	6.11977	6.40295	6.40507	3.64551	4.96484	-0.0122042	2.59425	0.00408136	0.949208	1
Atac2	9.19848	8.79344	8.35094	10.9521	8.61694	11.1467	12.2571	9.76011	10.6051	12.1864	-0.28784	3.47627	4.21027	0.0431802	0.633575
Atac3	18.397	15.3418	18.5998	13.4413	11.2912	14.4252	15.55	15.5552	15.5763	17.377	-0.0399175	3.95047	0.0838577	0.772824	1
ATbp	7.59875	10.4773	7.97135	8.96084	9.80549	9.17966	6.76883	8.23509	9.27949	8.12429	0.132732	3.09212	0.511137	0.476558	1
Ate1	58.7903	66.2315	44.4118	51.2759	59.7243	76.7157	63.1148	68.9308	59.6539	71.5389	-0.274074	5.8801	8.80048	0.00388562	0.215929
Atet	125.579	118.618	112.738	136.653	127.174	102.725	122.022	131.762	111.354	104.713	0.117762	7.07133	2.40147	0.124844	0.828738
Atf-2	12.7979	16.2772	15.1835	10.9521	10.3998	14.4252	12.0741	10.6751	11.2679	14.2175	0.062714	3.85457	0.169268	0.681773	1
Atf3	59.1902	81.5732	78.9543	77.6606	88.8437	66.2247	82.3236	82.6559	81.1955	92.0753	-0.0625467	6.17719	0.368093	0.545622	1
Atf6	97.184	115.063	139.309	170.754	172.933	170.042	122.388	165.922	141.181	133.374	-0.0734042	6.76548	0.15329	0.696366	1
Atg1	130.778	137.327	140.827	148.352	142.625	144.689	138.67	143.047	139.855	145.786	-0.0242859	7.17093	0.152027	0.697557	1
Atg10	3.99934	2.43223	3.79588	3.73368	4.45704	3.27845	1.82941	1.52502	2.98269	1.35405	0.726867	1.76524	4.73839	0.0321999	0.574612
Atg101	86.7857	83.2571	85.7869	82.6389	85.278	87.4254	79.2136	77.4709	72.2474	80.1145	0.0935844	6.32034	1.82856	0.179796	0.886663
Atg12	16.3973	18.1482	13.6652	16.4282	15.1539	20.545	15.55	16.1652	19.8846	16.9256	-0.14679	3.91794	1.1989	0.299618	0.926907
Atg13	46.3924	43.4059	45.5506	40.0749	40.4105	48.0839	39.5153	38.7354	37.118	35.2053	0.114669	5.16599	1.10644	0.295764	0.923338
Atg14	34.7943	35.3609	32.265	28.376	26.148	41.3085	37.1371	37.2104	41.7577	37.462	-0.311335	5.30432	8.50141	0.00451044	0.228625
Atg16	27.1955	20.0191	22.3957	19.6641	25.5537	17.4851	20.1235	19.2152	16.9019	19.8594	0.28077	4.42293	6.8527	0.0178982	0.463442
Atg17	113.981	124.605	139.688	116.74	115.289	122.395	107.935	106.751	113.011	119.833	0.0978995	6.9428	1.72058	0.193063	0.886663
Atg18a	98.3838	91.3022	83.5094	75.6693	93.5978	98.7906	83.6042	89.671	82.8526	87.7875	-0.00247242	6.4414	0.00120417	0.972397	1
Atg18b	61.9898	54.6316	64.1504	56.5031	73.9869	62.072	53.9677	70.7608	62.6365	51.6795	0.0481871	5.92619	0.270322	0.604434	1
Atg2	80.7867	86.4377	89.2032	83.8834	85.5752	103.818	79.7624	83.266	87.8237	77.6321	-0.021195	6.53181	0.0741521	0.786029	1
Atg3	37.9937	43.593	39.8567	32.6075	29.1193	37.1558	37.1371	29.5853	33.4724	34.3026	0.0909408	5.16952	0.537708	0.465351	1
Atg4a	60.3901	58.9348	70.2238	50.7781	52.5931	69.7217	53.2359	47.2755	65.6192	60.7065	-0.0220842	5.82993	0.0366852	0.848553	1
Atg4b	36.7939	42.8447	34.9221	43.0618	45.4618	49.6139	39.3324	36.2954	38.1122	44.0066	-0.02754	5.39688	0.106414	0.785533	1
Atg5	17.1972	18.3353	12.906	16.1793	16.3425	22.9492	17.9283	23.4853	18.8904	18.9567	-0.324407	4.23398	7.70872	0.00672574	0.288465
Atg6	34.7943	27.8771	39.0976	22.8999	28.2279	27.7575	25.7947	23.7903	22.8673	29.112	0.222453	4.79268	4.31767	0.0556713	0.689138
Atg7	14.3976	14.5934	17.461	19.4152	17.531	22.2935	15.1841	16.1652	12.5936	16.9256	-0.00378099	4.12857	0.00069088	0.97909	1
Atg8a	500.718	548.374	601.647	583.699	658.75	648.915	459.366	624.342	546.164	516.118	0.0502336	9.03773	0.311722	0.578057	1
Atg8b	0	0	0	0	0	0	0	0	0	0	0	-0.928699	0	1	1
Atg9	40.7933	42.4705	31.8854	36.3412	49.6217	52.2366	43.723	37.8204	39.1064	40.3958	-0.0853788	5.47401	0.655291	0.420432	1
atilla	100.383	110.199	113.497	90.604	95.9749	116.931	113.79	111.936	114.668	105.39	-0.140331	6.80831	1.95881	0.165189	0.886663
atk	2.3996	2.24513	1.89794	2.24021	3.56563	1.96707	0.731765	0.610007	0.994231	1.57972	1.02865	1.81729	1.36224	0.246333	0.886663
atl	111.182	126.85	147.66	108.277	129.254	145.345	118.18	140.607	121.959	122.993	-0.059112	6.94355	0.599278	0.440948	1
atms	40.3933	36.1093	40.2363	29.1227	30.0107	28.4132	34.5759	34.1604	33.8038	42.6525	0.0110612	5.28974	0.00982866	0.930207	1
ato	0.399934	0.374189	0.379588	0	0.297136	0	1.09765	0.91501	0	1.35405	-1.24641	-0.194208	3.37901	0.0694373	0.742696
Atox1	68.7887	72.4056	67.9463	73.678	64.1814	78.0271	68.7859	62.5257	63.6308	72.4416	0.00572915	6.13471	0.00405013	0.966353	1
ATP7	34.3943	42.2834	39.4772	35.8434	37.7363	39.56	42.0765	46.0555	50.043	48.2944	-0.245454	5.43623	6.35244	0.0135428	0.396645
Atpalpha	4497.66	4242.18	4583.15	5242.59	4481.4	3532.64	4256.86	4252.66	4296.73	3896.05	0.187753	12.1995	6.08914	0.0155556	0.423777
ATPCL	291.952	316.377	299.115	286.249	355.375	327.189	312.281	315.069	352.621	284.35	-0.0383117	8.3503	0.335366	0.56401	1
ATPsyn-b	545.91	436.117	431.971	417.177	433.224	476.905	423.692	421.515	382.447	403.055	0.102586	9.00558	0.859457	0.35645	0.983723
ATPsyn-beta	2621.17	2138.12	2316.25	2400.01	2550.02	2466.71	2081.87	2336.33	2112.41	1881.45	0.144524	11.3167	1.9017	0.171417	0.886663
ATPsyn-Cf6	285.153	254.823	256.602	213.816	204.43	230.366	231.421	200.082	191.555	209.877	0.190047	8.10439	2.80124	0.0977761	0.790373
ATPsyn-d	371.539	308.519	290.385	242.689	224.932	241.513	305.329	239.733	238.947	237.41	0.185306	8.43465	2.01029	0.1598	0.886663
ATPsyn-gamma	516.315	441.169	433.869	363.412	383.008	374.399	400.459	351.059	364.883	350.924	0.214077	8.91584	3.72039	0.0570057	0.693479
AttA	6.39895	8.04507	50.1056	24.3934	32.685	27.1019	27.8071	9.1501	25.5186	13.5405	0.198599	4.78178	0.0378362	0.846225	1
AttB	3.19947	2.99351	7.21217	8.71193	2.37709	9.39823	9.33001	7.62509	5.30256	4.51349	-0.593256	4.39467	0.27615	0.60057	1
AttC	10.3983	9.16763	26.5712	54.0139	11.5883	63.6019	43.1742	17.9952	76.5558	26.6296	-1.01212	6.12878	0.684738	0.41022	1
AttD	0	0.187095	3.79588	0	2.97136	0.65569	2.1953	0.610007	0	2.93377	-0.11268	1.06325	0.00946065	0.922739	1
att-ORFA	15.5974	18.1482	16.3223	14.4369	13.9654	12.8952	15.55	14.3352	12.925	13.0891	0.190525	3.80582	1.65809	0.201269	0.886663
att-ORFB	0	0	0	0	0	0	0	0	0	0	0	-1.30545	0	1	1
Atu	14.7976	19.2707	14.8039	11.6989	9.21122	11.3653	15.9159	11.2851	19.8846	17.377	-0.104886	4.09064	0.209067	0.648637	1
Atx-1	0.799868	0.748378	0.379588	0.746737	0	0.218563	0.731765	0	0	0	1.17879	-0.653065	1.99717	0.161154	0.886663
Atx2	181.57	183.54	166.26	172.247	158.373	149.497	179.648	162.567	172.996	179.186	0.030765	7.46295	0.137684	0.711495	1
Atxn7	38.3937	31.8061	23.914	26.3847	25.8508	26.009	31.6489	31.1104	28.8327	32.4972	-0.0396183	4.9602	0.109952	0.740995	1
aub	3.59941	4.11608	4.93464	3.9826	3.86277	2.18563	2.92706	4.57505	0.994231	5.64187	0.308494	2.02395	0.482501	0.489139	1
aur	1.1998	2.80642	0.759176	2.48912	1.18854	2.4042	3.47589	0.305003	1.32564	2.03107	-0.154269	1.65133	0.106896	0.74449	1
aust	0	0	0	0	0	0	0	0	0	0	0	-1.2841	0	1	1
aux	103.583	98.5988	105.525	106.534	108.455	102.506	100.801	115.901	90.8064	93.2037	0.0543842	6.7132	0.533127	0.467253	1
ave	14.7976	10.8515	9.86929	10.7032	10.994	13.3324	8.59824	12.5051	9.27949	11.0581	0.0550608	3.37612	0.121825	0.729733	1
Aven	8.79855	6.54831	5.31423	7.21845	5.64558	7.43116	6.40295	5.49006	5.63397	6.31889	0.0840342	2.89853	0.271713	0.709813	1
awd	255.558	262.681	219.781	224.021	212.749	401.719	297.463	230.888	251.209	304.209	-0.339573	8.05745	7.55245	0.00728261	0.296712
Awh	3.99934	7.67088	5.69382	6.47172	8.02267	4.80839	2.74412	5.49006	5.63397	6.54457	0.386047	2.63882	3.18825	0.077647	0.742696
Axn	76.7874	75.9604	83.889	82.8878	73.6897	85.0212	79.7624	75.9459	66.6135	74.247	0.0404634	6.35691	0.381869	0.687616	1
axo	111.582	127.037	94.897	135.906	105.186	102.943	111.96	118.951	113.342	109.001	0.0512935	6.47757	0.237137	0.627504	1
Axs	40.7933	34.4254	34.1629	35.8434	36.8449	26.8833	28.7218	25.6203	27.5071	30.2404	0.383951	5.12823	11.1567	0.00123386	0.113102
Axud1	37.9937	40.5995	37.9588	35.5944	34.1706	45.6797	44.4547	43.3105	30.1583	41.7498	-0.144953	5.5303	2.75192	0.100731	0.798358
az2	10.7982	11.5999	11.7672	9.20975	6.53699	12.2395	12.9888	10.9801	9.27949	11.5094	-0.203634	3.5311	1.7644	0.187544	0.886663
b	41.9931	33.3028	29.2283	26.3847	25.5537	37.8115	31.8318	43.9205	37.7808	45.1349	-0.332012	5.05224	3.86416	0.0525107	0.678766
B4	164.773	182.417	200.802	223.274	237.709	191.462	183.49	211.367	203.817	187.31	0.0473594	7.49599	0.24769	0.619959	1
B52	555.109	544.258	526.489	567.769	577.632	576.789	571.509	592.927	520.314	562.156	-0.0270793	9.13884	0.206363	0.650762	1
b6	2.79954	1.87095	0.379588	1.24456	1.78282	0.874254	1.28059	0.91501	1.32564	2.48242	0.214467	1.48118	0.316737	0.57502	1
bab1	12.398	12.9095	7.21217	11.45	19.9081	14.2066	14.6353	18.6052	16.2391	16.0229	-0.301211	3.74809	3.42981	0.0674142	0.742616
bab2	43.9928	42.2834	59.9749	46.5466	57.3472	40.8714	46.4671	47.8855	48.0545	43.5552	0.138424	5.59599	1.87629	0.174274	0.886663
babo	149.175	152.108	178.786	179.466	201.755	175.069	166.477	173.852	184.264	150.525	0.0194231	7.33847	0.042233	0.837655	1
babos	39.9934	36.1093	39.0976	32.8564	30.9021	55.2965	40.0642	25.3153	42.0891	37.2363	-0.170666	5.25649	0.766497	0.383709	1
Bacc	580.704	652.025	737.919	639.953	634.088	670.771	638.099	614.887	659.175	617.897	0.0196186	9.05547	0.0520914	0.819998	1
Bace	0	0.374189	0.379588	0.746737	110.832	1.74851	0.731765	1.22001	3.97692	0.677024	3.84624	2.47841	19.5299	2.8381e-05	0.00719287
baf	31.5948	28.0642	24.2936	17.4239	21.3938	28.1947	26.5265	22.2653	25.85	29.3377	-0.116771	4.7054	0.784375	0.378243	1
bai	65.9891	69.5992	74.3993	68.2019	71.9069	91.3595	86.7142	71.3708	78.5442	81.4686	-0.228361	6.16706	8.29585	0.00499976	0.245056
Baldspot	148.376	181.108	238.761	190.169	285.251	205.231	183.856	175.682	186.915	183.699	0.157612	7.46264	2.59375	0.110901	0.808604
ball	9.99835	6.17412	5.69382	6.22281	3.86277	7.43116	5.3053	7.32008	8.28526	7.89861	-0.190131	2.8849	0.418209	0.519531	1
bam	0	0.187095	0.379588	0.497824	0	0	0.365883	0	0	0.225675	0.580629	-0.288454	0.226801	0.635365	1
ban	0	0	0	0	0	0	0	0	0	0	0	-1.30545	0	1	1
bap	1.1998	0.935473	1.51835	0.995649	2.37709	1.31138	1.28059	0.305003	1.32564	0.451349	0.52831	0.41652	1.35472	0.269991	0.893579
Bap170	33.1945	41.9092	36.0609	37.0879	32.3878	28.6318	37.1371	37.5154	30.4897	35.8823	0.0955362	5.34873	0.583525	0.446996	1
Bap55	17.5971	19.2707	15.1835	16.4282	17.531	18.3593	21.953	12.5051	14.5821	21.4391	-0.0574475	4.25141	0.175367	0.676416	1
Bap60	34.7943	40.2253	31.5058	30.3673	30.605	42.6199	39.3324	33.8554	38.4436	37.6877	-0.193936	5.28485	2.89458	0.0924424	0.781405
barc	73.1879	62.3025	69.085	55.0096	43.3819	52.2366	63.6636	46.9705	62.6365	67.7024	0.0399259	6.01279	0.0976392	0.755428	1
barr	7.99868	9.54182	5.69382	6.22281	7.4284	5.90121	8.78118	7.32008	6.2968	9.47834	-0.0287134	3.08627	0.0161516	0.919525	1
baz	68.3887	62.1154	64.9096	68.6998	73.6897	64.6948	67.6883	76.5559	69.2648	65.4457	-0.0241117	6.09482	0.0531354	0.818235	1
bbc	207.966	190.649	185.239	187.182	188.087	172.665	190.442	204.657	179.293	199.045	0.0193455	7.60362	0.178997	0.673278	1
bbg	47.1922	50.3284	46.3097	38.0836	60.9129	44.1498	46.1012	42.3955	52.0314	46.9403	0.069401	5.4857	0.377048	0.540787	1
BBS1	0.399934	0.748378	0	0.497824	0.594272	0.65569	0.548824	0.610007	0.994231	0.902699	-0.564573	-0.0614709	0.723429	0.397351	1
BBS4	5.59908	4.49027	3.41629	3.9826	7.72554	5.02696	4.39059	4.88006	3.64551	3.6108	0.218029	1.74943	0.520246	0.472667	1
BBS8	1.1998	1.87095	1.51835	2.48912	2.37709	2.18563	1.46353	2.74503	2.31987	1.35405	-0.0337705	0.889953	0.00637746	0.940753	1
bbx	0.399934	1.68385	1.89794	1.49347	3.2685	2.84132	0.548824	1.83002	2.98269	1.12837	-0.0263212	0.714966	0.00298581	0.956548	1
bc10	45.1926	49.2059	50.1056	50.5292	54.3759	59.4492	54.3336	56.1206	49.7115	44.4579	-0.0815757	5.60007	0.72882	0.395606	1
BCAS2	7.59875	10.2902	7.59176	6.47172	3.2685	7.43116	8.78118	7.93009	10.6051	9.92969	-0.317534	3.09326	2.0685	0.153949	0.886663
bcd	0	0.748378	0	0.497824	1.78282	0.218563	0	0.305003	1.98846	0.451349	0.340558	0.552632	0.114028	0.736799	1
bchs	165.973	187.843	175.37	219.789	210.075	146.656	178.002	197.337	177.636	171.738	0.14064	7.68494	1.93621	0.167621	0.886663
BCL7-like	12.398	11.9741	11.7672	9.70758	9.50835	13.1138	9.14707	11.5901	14.9135	10.8324	-0.0978835	3.44372	0.352149	0.596182	1
bcn92	18.7969	21.1417	19.359	20.1619	13.6683	18.5779	19.9406	17.6902	19.2218	23.6958	-0.0880705	4.39773	0.261395	0.610456	1
Bdbt	17.997	12.7224	13.2856	11.201	9.50835	13.9881	15.733	17.3852	14.5821	14.6689	-0.253677	3.87451	2.61779	0.109284	0.808604
bdg	36.7939	33.8641	36.4405	32.3586	34.1706	29.9432	33.6612	27.7553	28.8327	28.8864	0.21231	5.03605	5.02571	0.0275123	0.549164
be	35.9941	30.6835	28.8487	34.5988	36.5477	36.9372	34.9418	35.9904	33.141	35.2053	-0.0823695	4.95624	0.730418	0.39509	1
BEAF-32	27.5955	30.8706	25.812	25.389	21.9881	28.4132	32.9294	21.9603	22.8673	28.8864	-0.0433955	4.84448	0.150077	0.699406	1
beag	31.1949	24.8836	21.2569	23.8956	11.2912	21.2006	24.6971	19.8252	20.216	22.7931	0.0388579	4.588	0.0582642	0.809828	1
beat-Ia	27.9954	28.4384	31.1262	27.8782	28.2279	23.8234	29.0877	27.1453	34.7981	33.1742	-0.041297	4.98329	0.169708	0.681382	1
beat-Ib	83.9862	70.1605	65.2891	77.9095	73.6897	64.9133	83.9701	70.4558	63.6308	75.3754	0.0463597	5.98237	0.259611	0.734942	1
beat-Ic	44.7926	45.2769	48.5873	53.5161	59.4272	41.7456	46.2842	50.3256	49.3801	47.3917	0.100785	5.45845	0.600795	0.440372	1
beat-IIa	106.382	103.089	108.942	113.504	109.346	105.129	110.314	112.241	97.1032	101.779	0.0389932	6.81697	0.231567	0.63157	1
beat-IIb	34.7943	37.2318	30.7466	34.5988	30.605	30.3803	34.21	36.2954	28.8327	36.3336	0.01913	5.39418	0.0420465	0.838009	1
beat-IIIa	0	0	0	0	0	0	0	0	0	0	0	-1.30545	0	1	1
beat-IIIb	65.5892	70.5347	70.983	90.853	76.0668	70.8145	67.3224	73.5058	73.9045	67.2511	0.0884873	6.035	0.870473	0.353401	0.980082
beat-IIIc	35.9941	46.3995	50.8648	57.2498	46.3532	38.6857	34.21	41.7855	52.3628	40.6214	0.201549	5.17535	2.11212	0.149727	0.8804
beat-IV	57.5905	61.367	57.6974	72.9313	61.21	62.2906	69.7007	60.3907	51.7	62.2862	0.0199967	5.96346	0.0611568	0.854855	1
beat-Va	94.3845	61.1799	56.5586	50.2803	49.6217	76.4972	48.4795	75.0309	72.2474	62.2862	-0.104403	5.36573	0.231855	0.631358	1
beat-Vb	25.1958	27.1287	31.5058	30.3673	29.7136	30.8174	27.99	33.5504	28.1699	28.8864	-0.0523418	5.03845	0.210906	0.647201	1
beat-Vc	22.3963	20.7675	18.9794	21.6554	21.6909	19.6707	20.4894	19.8252	17.8962	17.6026	0.141654	4.52598	1.8328	0.190801	0.886663
beat-VI	60.3901	58.9348	58.8361	64.9661	57.6444	45.8983	53.053	47.5805	57.6654	51.9052	0.233515	5.81618	5.78059	0.0183213	0.466513
beat-VII	131.178	137.14	148.039	169.509	161.048	129.827	147.268	149.757	151.786	134.502	0.0683025	6.98033	0.441476	0.508165	1
beg	11.5981	10.8515	7.97135	7.96519	9.80549	13.5509	12.44	10.6751	10.6051	10.381	-0.264407	3.45298	3.02951	0.0852914	0.761703
bel	144.776	173.062	146.901	155.57	147.379	151.246	155.683	165.617	161.728	159.101	-0.0452176	7.42624	0.470622	0.727512	1
Bem46	17.5971	19.832	25.812	19.913	22.8795	27.3204	19.3918	23.4853	15.2449	17.6026	0.0333181	4.35199	0.0586709	0.895879	1
ben	172.772	197.011	230.79	213.318	221.663	233.644	185.685	234.243	206.469	192.049	-0.0220422	7.50506	0.0544148	0.816099	1
Best1	74.7877	78.5797	69.4646	78.1584	76.0668	84.584	77.0183	81.4359	78.2128	76.0524	-0.0734008	6.24789	0.920508	0.339995	0.964917
Best2	58.7903	60.6186	64.9096	68.2019	71.3126	68.1918	57.8095	74.4209	61.3109	67.9281	-0.0238449	6.0499	0.0596633	0.807603	1
Best3	0	0.187095	0	0	0.297136	0	0	0	0.33141	0.225675	0.12729	-0.900544	0.0150782	0.902598	1
Best4	0	0	0	0	0.594272	0	0	0	0	0	2.46292	-1.08695	3.01354	0.0877766	0.770325
Bet1	9.99835	13.0966	14.4243	13.9391	10.6969	19.015	14.2694	15.5552	12.925	14.8945	-0.299394	4.04185	4.50481	0.0366358	0.602925
Bet3	31.1949	22.6384	24.2936	22.1532	23.7709	28.8504	24.88	25.3153	26.1814	27.9837	-0.113951	4.65212	0.926472	0.338444	0.963169
Bet5	19.5968	14.9676	17.8406	16.4282	13.074	19.2336	15.3671	16.4702	14.9135	14.2175	0.0170546	4.09454	0.0192216	0.956325	1
beta3GalTII	11.1982	4.86446	6.83258	7.96519	7.4284	6.99403	7.86648	6.71008	6.62821	9.25266	-0.011842	3.0068	0.00501895	0.943684	1
beta4GalNAcTA	27.1955	27.5029	34.5425	29.8695	32.685	34.7516	26.3436	35.9904	27.8385	33.8512	-0.0667145	4.84703	0.258493	0.612442	1
beta4GalNAcTB	15.5974	13.6579	16.3223	12.6945	16.0453	15.0809	14.2694	13.7252	11.9308	13.9918	0.0909549	3.85381	0.462319	0.626861	1
beta4GalT7	7.59875	7.85797	7.21217	5.22716	5.64558	5.68265	6.76883	7.32008	5.96539	6.77024	0.0425691	2.80728	0.038854	0.844197	1
betaCOP	98.3838	96.915	95.6562	75.1715	68.3413	97.4793	114.887	85.401	97.766	108.098	-0.217114	6.88592	3.20259	0.0769944	0.742696
beta'COP	55.1909	63.6122	61.1137	57.0009	54.673	71.6888	68.4201	62.2207	64.2936	67.4767	-0.196081	6.02063	5.98521	0.0164346	0.43914
betaggt-I	18.7969	26.0061	20.1182	21.9043	32.3878	25.3534	19.3918	23.1803	25.1872	26.4039	0.00970916	4.45584	0.00544893	0.941325	1
betaggt-II	41.9931	34.2383	25.4324	27.1314	32.3878	36.063	40.613	38.1254	33.141	38.816	-0.218415	5.11844	3.40887	0.0682405	0.742696
betaNACtes1	0	0	0	0	0	0	0	0	0	0	0	-1.28433	0	1	1
betaNACtes2	0	0	0	0.248912	0	0	0	0	0	0.225675	0.143994	-1.27608	0.0131626	0.915156	1
betaNACtes3	0	0.187095	0	0	0	0	0	0	0	0	1.64707	-1.23441	2.03069	0.214216	0.886663
betaNACtes4	0	0.187095	0	0	0	0	0	0	0.33141	0	0.0788065	-1.20276	0.00585283	0.939342	1
betaNACtes6	0	0	0	0	0	0	0	0	0	0	0	-1.24289	0	1	1
beta-Spec	687.487	681.024	631.635	584.446	508.994	455.486	701.031	590.487	679.06	677.25	-0.00456923	9.46634	0.00119287	0.972527	1
betaTry	0	0	0	0	936.275	1.52994	0.182941	0.610007	6.2968	0.677024	6.85005	3.85975	30.2581	6.35801e-07	0.000385024
betaTub56D	474.322	430.505	318.095	389.05	348.838	410.025	455.89	433.715	425.531	451.575	-0.150687	8.82155	2.59104	0.111086	0.808604
betaTub60D	10.3983	10.1031	11.7672	9.45866	12.1826	18.1408	15.0012	18.6052	18.8904	14.6689	-0.660835	3.9412	8.3387	0.0048934	0.242165
betaTub85D	1.1998	2.61932	0.759176	0.497824	0.891408	1.31138	0.731765	0.91501	2.31987	2.48242	-0.26658	0.635646	0.314456	0.698251	1
betaTub97EF	138.377	112.257	98.6929	114.749	101.323	113.872	120.741	112.851	111.685	111.483	-0.0150165	6.86197	0.0295477	0.863919	1
bft	0	0	0	0	0	0	0	0	0	0	0	-1.30545	0	1	1
BG642163	0	0	0	0	0	0	0	0	0	0	0	-1.2267	0	1	1
BG642167	0	0	0	0	0	0	0	0.305003	0	0	-1.56254	-1.27612	1.3987	0.265234	0.886663
BG642312	0	0	0	0	1.78282	0	0	0	0	0.225675	2.34894	-1.02147	4.17563	0.0445138	0.644051
Bgb	34.7943	35.3609	35.3017	32.8564	27.0394	27.539	40.613	27.4503	34.7981	38.816	-0.038599	5.29782	0.130905	0.718371	1
bgcn	0.799868	0.187095	0	0.248912	0	0.218563	0	0	0	1.57972	-0.680871	-0.497191	0.519482	0.472991	1
bgm	106.782	144.811	140.448	87.866	88.2494	248.944	133.913	78.9959	151.123	153.91	-0.434771	6.37912	1.73179	0.191633	0.886663
B-H1	5.59908	7.10959	6.453	5.97389	10.994	9.61679	8.04942	10.9801	8.28526	3.83647	-0.154861	2.92583	0.580009	0.448364	1
B-H2	3.99934	5.61284	6.83258	9.20975	2.37709	6.11977	5.3053	9.45511	5.63397	3.6108	-0.0670123	2.35437	0.0640613	0.938607	1
BHD	12.7979	9.35473	9.4897	7.71628	7.4284	8.30541	7.13471	7.01508	8.28526	11.0581	0.142002	3.3402	0.717659	0.433473	1
bi	31.5948	32.1803	36.0609	36.5901	40.1134	28.8504	31.4659	34.4654	36.1237	34.5282	0.0974202	5.11025	0.836155	0.363021	0.991856
BI-1	150.775	150.985	150.696	172.496	150.945	208.728	167.208	154.637	169.351	153.459	-0.137355	7.31523	1.96651	0.16437	0.886663
bib	13.1978	19.6449	19.359	20.4108	13.3711	14.6437	17.0135	15.5552	18.2276	14.2175	0.124606	3.64004	0.67993	0.411861	1
bic	302.35	339.764	313.16	265.589	297.433	354.073	318.867	272.063	309.869	314.139	-0.0477034	8.25718	0.332153	0.565879	1
BicC	0	0	0	0	0	0	0	0	0	0	0	-1.30545	0	1	1
BicD	129.579	127.973	141.966	146.111	147.082	115.62	131.718	122.611	137.535	141.272	0.0946122	7.00318	1.33681	0.250756	0.886663
bif	420.331	394.395	370.858	353.455	369.934	303.366	408.508	393.455	398.355	376.877	0.0216276	8.64232	0.0576444	0.810822	1
BigH1	1.1998	3.3677	0.379588	1.9913	2.37709	0	0.182941	0.305003	0.662821	0	3.21943	2.04073	7.54776	0.00743686	0.300474
bigmax	25.9957	26.1932	23.1549	14.188	16.0453	19.4521	18.843	14.6402	14.9135	22.7931	0.203577	4.43549	1.44854	0.232021	0.886663
Bili	72.3881	86.8119	79.3339	101.058	96.8663	77.8086	85.0677	89.976	78.2128	92.0753	0.0481434	6.60801	0.29743	0.586891	1
bin	0	0.187095	0.759176	0	1.78282	0	0	0.305003	0	0.225675	2.1609	-0.794691	4.52159	0.036752	0.602925
Bin1	7.59875	6.7354	5.69382	10.4543	11.5883	12.4581	8.78118	5.79507	5.30256	9.92969	-0.0277566	3.2448	0.0160341	0.899528	1
bin3	96.7841	101.779	99.0725	111.762	101.918	111.904	97.5077	114.071	105.388	98.3942	-0.0420987	6.65091	0.283791	0.610197	1
bip1	9.99835	8.60635	9.86929	7.21845	9.21122	12.021	9.87883	8.5401	13.9192	6.31889	-0.177738	3.41816	0.9268	0.338359	0.963169
bip2	267.956	264.552	317.336	333.791	317.936	267.303	281.181	294.938	298.269	269.907	0.0894876	8.04774	0.702236	0.404325	1
Bka	7.19881	7.67088	6.453	8.46302	7.13126	8.52397	6.03706	7.32008	9.27949	9.92969	-0.136226	3.01989	0.55233	0.51458	1
bl	144.376	141.443	132.856	118.482	128.957	127.204	146.902	136.032	130.907	139.693	-0.0324578	7.15134	0.207832	0.649606	1
blanks	0	0	0	0	0	0	0.182941	0.305003	0	0.677024	-3.38837	-0.916321	6.16911	0.0151117	0.416384
Blimp-1	86.3858	106.27	106.285	117.238	118.854	102.288	100.435	118.036	128.587	108.098	-0.0542752	6.64918	0.105798	0.745759	1
Blm	10.7982	9.91601	8.35094	10.7032	5.34845	6.99403	9.69589	7.62509	6.95962	9.47834	0.13775	3.42503	0.492047	0.484884	1
Blos1	20.7966	17.2127	11.3876	13.6902	13.9654	12.2395	15.0012	13.4202	10.6051	14.2175	0.224034	3.93662	1.83669	0.178841	0.886663
Blos2	6.79888	8.98054	8.35094	10.4543	10.3998	10.0539	6.95177	10.0651	6.95962	7.22159	0.142039	3.20724	0.662913	0.417752	1
Blos3	7.99868	8.98054	9.4897	6.47172	5.94272	8.30541	8.78118	9.1501	8.61667	6.31889	-0.0810522	3.03186	0.192855	0.661637	1
Blos4	10.3983	8.79344	5.69382	8.46302	8.61694	10.491	8.59824	10.6751	7.62244	7.22159	-0.0838807	2.98113	0.197694	0.657691	1
blot	64.3894	63.9863	56.179	66.7085	76.0668	64.4762	61.4683	71.0658	61.6423	68.3794	0.00358368	6.06118	0.00152837	0.968905	1
blow	20.3966	16.6514	15.9427	18.6684	15.4511	16.6108	23.0506	16.7752	20.216	16.4743	-0.103098	4.45103	0.508113	0.47786	1
blp	19.9967	15.1547	16.3223	18.4195	14.5597	19.2336	20.6724	15.5552	21.2103	19.6337	-0.199312	4.31232	2.46416	0.120092	0.816783
blue	54.391	55.9413	56.179	46.0488	46.0561	46.9911	58.9071	44.8355	52.6942	53.9363	0.00309604	5.86849	0.00104417	0.974296	1
blw	2306.82	1842.88	1825.44	1808.35	1971.2	1854.29	1672.63	1815.08	1584.14	1517.89	0.208029	11.0881	3.99913	0.0486372	0.666307
BM-40-SPARC	164.773	181.856	154.872	111.513	92.7064	233.644	206.724	132.677	180.619	231.091	-0.482985	7.43917	8.07134	0.00559776	0.261547
Bmcp	30.7949	26.9416	26.5712	32.3586	31.7936	36.5001	26.1606	33.5504	28.1699	31.5945	-0.0711581	4.73414	0.378229	0.540155	1
bmm	120.38	81.3861	90.342	79.6519	117.072	90.4852	73.9083	76.5559	68.6019	77.1807	0.331358	6.41391	3.06988	0.0832719	0.758113
bnb	420.731	430.692	356.813	319.354	284.062	297.028	411.252	348.314	383.442	382.519	-0.0087238	8.4295	0.00585052	0.939206	1
bnk	0	0.187095	0	0	0	0	0	0	0	0	1.64689	-1.26169	1.55702	0.222748	0.886663
bnl	8.39862	11.0386	9.11011	14.188	8.02267	10.2725	7.68354	8.5401	8.28526	9.47834	0.216602	3.43006	1.12092	0.292646	0.919785
BobA	0	0	0	0	0	0	0	0	0	0	0	-1.20567	0	1	1
boca	19.5968	18.8966	17.461	12.1967	12.4797	17.0479	20.3065	14.3352	17.2333	20.3107	-0.159947	4.29884	0.947897	0.332949	0.960796
bocksbeutel	20.7966	23.9481	27.7099	24.1445	34.7649	28.8504	25.063	23.7903	22.8673	25.2756	0.0581166	4.56679	0.242526	0.659808	1
boi	5.59908	5.23865	4.17547	6.96954	7.13126	5.02696	4.75647	5.79507	6.95962	4.51349	0.137258	2.98297	0.336232	0.563508	1
bol	237.161	265.3	336.695	366.897	279.011	228.617	239.287	283.348	295.949	262.911	0.182269	8.06304	1.88267	0.173551	0.886663
boly	0	0	0	0	0	0	0	0	0	0	0	-1.30545	0	1	1
bon	108.382	103.837	121.089	123.212	101.918	102.069	110.131	113.156	109.365	107.195	0.0430694	6.74921	0.335025	0.564207	1
bond	53.5912	58.1864	70.6034	53.765	105.78	52.4552	63.6636	55.2056	57.6654	56.193	0.259241	6.07824	3.60293	0.0609867	0.712876
bonsai	23.5961	20.5804	17.461	16.4282	16.9368	22.0749	21.953	21.9603	25.1872	20.085	-0.227822	4.41122	2.42818	0.122794	0.823898
bor	60.3901	52.7607	48.2077	46.7955	43.0847	48.9582	55.2483	47.5805	53.3571	56.6444	-0.0630952	5.64378	0.361976	0.548973	1
bora	0.799868	0.935473	0	0.995649	0.297136	0.218563	0.182941	0	0.994231	0.225675	1.07335	0.472976	1.00806	0.31897	0.948584
borr	0	2.05804	0.759176	0.746737	0	0	0.365883	0	0.662821	0	1.96853	0.964198	3.11655	0.0811709	0.751381
boss	328.746	249.958	238.381	262.851	265.937	206.542	238.738	263.828	238.947	228.383	0.193707	8.30133	5.48767	0.0214287	0.49508
botv	22.3963	23.761	24.6732	25.1401	25.2566	33.4402	25.063	28.3653	23.1987	22.7931	-0.132464	4.61883	1.82945	0.179691	0.886663
bou	9.99835	9.35473	12.906	10.7032	6.53699	8.9611	11.5253	8.8451	8.94808	9.02699	0.0452143	3.57403	0.0724895	0.911873	1
bowl	19.5968	21.703	23.1549	28.1271	27.0394	26.2276	23.0506	32.0254	21.8731	21.2134	-0.0483898	4.43265	0.122007	0.738421	1
BoYb	0.399934	0.187095	0	0.497824	0.594272	0	0	0	0	0.225675	2.30618	0.233314	2.75147	0.101332	0.799164
br	37.1939	46.0253	48.2077	48.289	46.0561	27.1019	45.7353	51.2406	52.6942	41.9755	0.0561085	5.52028	0.227623	0.634486	1
Br140	31.1949	30.4964	19.7386	29.1227	24.9594	28.6318	30.9171	23.4853	33.4724	27.9837	-0.0861018	4.95266	0.425695	0.515826	1
brat	89.1853	106.27	128.301	140.635	123.609	93.9823	98.7883	129.931	126.267	103.81	0.0939524	6.66327	0.407853	0.524735	1
Brca2	19.5968	17.0256	12.906	19.4152	16.6396	17.9222	17.0135	14.9452	14.9135	19.408	0.019931	4.1639	0.0216049	0.910854	1
Brd	0	0	0	0	0	0	0	0.305003	0.33141	0	-2.31707	-1.18369	1.42507	0.247131	0.886663
Brd8	17.5971	12.5353	8.35094	7.21845	8.02267	8.08685	7.68354	10.0651	11.5994	11.2837	0.141148	3.54538	0.393257	0.532231	1
Bre1	38.7936	47.3349	37.9588	34.8477	32.3878	30.3803	47.5647	32.6354	42.4205	48.2944	-0.0715986	5.48894	0.139187	0.709997	1
Brf	35.9941	31.619	25.0528	32.1097	22.8795	31.2546	37.6859	32.9404	28.8327	28.6607	-0.112904	5.07354	1.29662	0.257952	0.886663
brk	11.998	11.2257	16.7019	13.6902	13.6683	15.7366	11.1594	13.1152	15.2449	11.0581	0.0187433	3.35116	0.0117686	0.926675	1
brm	88.7854	95.044	79.7135	80.1497	65.9642	67.099	100.069	75.0309	95.1148	96.1374	-0.0806857	6.56348	0.482596	0.489096	1
Brms1	26.3957	25.2578	23.914	17.9217	19.611	20.7635	29.4536	25.6203	26.8442	25.5012	-0.18538	4.81379	1.82669	0.180016	0.886663
brn	5.19914	4.67736	7.21217	4.48042	3.2685	3.05989	4.02471	2.44003	7.29103	4.28782	0.234006	2.31071	0.938837	0.335258	0.961776
Bro	0	0.374189	0	0.248912	0	0	0	0	0	0.451349	0.604247	-1.25585	0.333579	0.569129	1
brp	768.673	703.288	789.164	756.195	613.289	436.908	753.169	604.517	737.719	666.869	0.182388	9.50698	2.45816	0.120538	0.817813
bru	55.1909	56.5026	49.3464	52.0227	62.1014	53.7666	57.6265	51.8506	53.0256	59.3524	-0.00281227	5.90755	0.00122544	0.972155	1
bru-2	37.9937	32.3674	36.4405	42.3151	54.0787	31.6917	32.1977	46.9705	34.1353	28.6607	0.231982	5.24611	3.20332	0.0769612	0.742696
bru-3	291.952	314.132	392.874	390.792	337.249	250.037	303.683	313.544	338.038	287.058	0.211401	8.05128	2.40324	0.124707	0.828738
Bruce	346.743	353.609	359.47	379.591	361.912	291.564	359.846	342.824	378.139	366.496	0.0513067	8.57699	0.322432	0.57161	1
brv1	0	0	0	0	0	0	0	0	0	0	0	-1.30545	0	1	1
brv2	0	0	0.379588	0	0	0	0.182941	0.305003	0.33141	0	-1.05705	-1.04019	0.736576	0.394473	1
brv3	0	0	0.379588	1.24456	0	0	0	0	0	0.225675	2.30202	-0.747445	3.09171	0.082202	0.75549
BRWD3	84.3861	80.4507	72.1217	75.9182	81.1181	64.2576	81.226	77.1659	82.5212	80.1145	0.0331448	6.40579	0.0867566	0.769042	1
bs	19.9967	15.903	15.5631	17.4239	17.531	19.6707	15.3671	19.5202	20.216	17.6026	-0.0945106	4.17514	0.511757	0.476291	1
bsf	99.1837	107.766	81.991	96.329	80.2267	88.5182	113.241	95.7711	94.1205	105.39	-0.0934535	6.82779	1.11253	0.294448	0.92126
Bsg	419.931	452.769	559.892	533.917	484.035	441.498	447.292	463.605	533.571	445.031	0.0725405	8.82922	0.650161	0.422249	1
Bsg25A	0	0	0	0	0	0	0	0	0	0	0	-1.2771	0	1	1
Bsg25D	76.3874	76.5217	81.2318	67.953	62.1014	57.4822	67.3224	73.8108	71.916	69.0565	0.101488	6.12482	0.754425	0.387464	1
bsh	3.19947	4.11608	3.79588	4.72933	4.45704	5.90121	4.75647	5.49006	3.97692	4.73917	-0.279938	2.32454	1.53045	0.219367	0.886663
bsk	179.57	162.024	181.063	205.85	206.212	203.483	178.551	198.862	158.083	169.03	0.0412137	7.49941	0.225058	0.636399	1
bt	1035.03	826.771	1099.67	932.674	1212.02	730.657	736.888	1011.09	951.81	729.381	0.295857	10.0845	3.1992	0.077148	0.742696
BTBD9	55.9908	44.9027	38.3384	44.3064	41.8962	36.063	39.3324	42.0905	41.7577	40.8471	0.17164	5.62515	2.96873	0.088434	0.772706
BtbVII	139.577	157.534	150.696	147.107	147.082	140.536	155.5	144.572	143.501	146.237	0.023277	7.34398	0.108452	0.742703	1
btd	1.1998	1.68385	1.13876	0.746737	0.594272	1.31138	1.09765	2.74503	0.662821	1.8054	-0.457327	0.789783	1.16503	0.3119	0.941762
Btd	0	0.561284	0	0	0	0.218563	0.182941	0.305003	0	0.225675	-0.250582	-0.630858	0.0532507	0.857294	1
Bteb2	0	0	0	0	0	0	0	0	0	0	0	-1.29099	0	1	1
BthD	0.799868	0.935473	0	0.497824	0.891408	0.218563	0.182941	0.610007	0.33141	0.225675	1.09124	0.369734	1.20055	0.276375	0.899227
Btk29A	33.1945	38.5415	30.367	39.577	41.0048	39.1228	37.503	39.9555	33.141	38.816	-0.0400146	5.25116	0.145432	0.758252	1
btl	9.59842	9.91601	12.906	13.4413	11.5883	8.30541	9.87883	12.2001	9.6109	11.9608	0.147694	3.50501	0.78983	0.376597	1
btn	0	0	0	0	0	0	0	0	0	0	0	-1.26416	0	1	1
btsz	230.362	254.074	225.855	251.899	231.172	228.399	263.07	258.948	230.993	251.627	-0.0465565	7.99335	0.334297	0.564631	1
btv	3.19947	4.30318	4.93464	4.72933	7.13126	4.58983	3.11	8.23509	3.97692	3.83647	0.0669034	2.29957	0.0385381	0.844824	1
btz	49.9918	42.6576	39.0976	38.0836	40.4105	36.5001	44.0889	37.2104	39.7692	44.6836	0.0501333	5.59632	0.170428	0.680746	1
Bub1	27.9954	22.2643	24.2936	20.6597	21.9881	20.7635	24.1483	17.3852	27.5071	19.8594	0.0879975	4.68366	0.483429	0.493979	1
Bub3	11.998	13.845	11.0081	14.188	14.2625	19.8893	18.1112	16.1652	10.2737	14.4432	-0.275099	4.11139	3.26512	0.074218	0.742696
BubR1	8.79855	8.04507	7.97135	10.7032	9.50835	7.21259	8.59824	7.62509	7.95385	6.31889	0.257404	3.15569	0.990857	0.322288	0.951449
Buffy	17.5971	15.3418	14.4243	11.6989	18.1253	13.5509	18.1112	12.5051	16.9019	15.7972	-0.00571208	4.19936	0.00168409	0.96736	1
bun	587.903	627.889	733.744	732.798	696.784	633.615	605.719	671.008	691.653	609.773	0.0735692	9.21542	1.04701	0.309028	0.939206
bur	96.7841	97.1021	86.9257	93.591	91.2207	106.877	93.3001	91.501	96.4404	92.301	-0.0446944	6.51203	0.343416	0.559378	1
Burs	0	0	0	0	0	0	0	0	0	0	0	-1.24941	0	1	1
bves	102.783	113.753	116.534	115.744	132.226	99.0092	109.399	119.561	115.994	102.456	0.0908762	6.65787	1.01434	0.316654	0.946002
bw	29.5951	38.1673	29.2283	34.101	24.068	35.4073	34.9418	33.8554	35.7923	29.5634	-0.116448	5.4188	0.82158	0.367217	0.994737
bwa	76.7874	63.0509	59.5953	74.6737	77.5525	76.4972	62.383	58.2557	60.3167	63.8659	0.127119	6.02223	1.4581	0.230498	0.886663
Bx	66.3891	82.8829	93.7582	85.8747	87.0608	74.5301	79.9454	90.281	87.4923	86.8848	-0.00786059	6.40274	0.00923723	0.923653	1
Bx42	41.1932	37.606	40.9955	26.3847	25.5537	31.9103	40.0642	33.5504	31.8154	38.816	-0.049132	5.24679	0.120491	0.729339	1
bxd	0	0	0	0	0	0	0	0	0	0	0	-1.29076	0	1	1
by	105.983	124.044	127.921	109.024	153.619	126.985	115.802	124.746	115.331	112.612	0.0602393	7.03783	0.785242	0.377981	1
byn	0	0	0	0	0	0	0	0	0	0	0	-1.21322	0	1	1
bys	11.998	13.845	12.5264	14.188	10.1026	14.4252	15.55	13.7252	15.2449	11.7351	-0.164285	3.85998	0.96126	0.329583	0.958172
Bzd	21.9964	16.6514	14.8039	13.4413	16.6396	17.4851	15.733	17.3852	19.2218	14.8945	-0.0241878	4.29684	0.0342792	0.853544	1
c11.1	87.5856	93.5473	88.0644	88.6127	97.4606	76.9343	89.8242	97.6011	97.4346	90.2699	0.0130226	6.56386	0.0254205	0.873693	1
c12.1	23.996	20.9546	25.4324	22.4021	25.5537	29.7246	24.5141	24.4003	24.8558	24.1472	-0.116942	4.51561	0.96224	0.329338	0.958172
c12.2	48.792	47.7091	37.9588	27.6293	25.2566	44.1498	39.5153	30.5003	33.4724	46.2633	-0.0588464	5.24462	0.201701	0.654466	1
C15	2.79954	1.87095	1.51835	1.24456	2.07995	1.96707	2.01235	0.91501	0.33141	2.7081	0.164058	1.10264	0.195119	0.791565	1
C1GalTA	51.5915	59.8703	61.4933	49.0357	61.5071	55.7337	60.1877	57.6457	64.9564	64.7686	-0.0962969	5.83065	1.84357	0.178038	0.886663
c(2)M	0	0.187095	0.379588	0	1.78282	0.437127	0	0	0.662821	0	1.12076	-0.302006	1.23579	0.269648	0.893259
c(3)G	9.99835	11.2257	11.3876	12.1967	12.7768	10.0539	11.7082	8.23509	11.2679	12.1864	0.105279	3.28219	0.255587	0.614444	1
C3G	161.573	169.695	182.202	185.937	199.081	158.458	156.964	168.362	183.933	173.092	0.0968908	7.45446	1.71537	0.193731	0.886663
C901	1.59974	0.561284	0.379588	0.746737	1.48568	1.96707	0.365883	0.610007	0	1.12837	0.113973	0.409203	0.0487099	0.923618	1
ca	117.581	117.121	111.599	116.242	122.717	111.249	121.107	120.476	116.325	111.032	0.0129922	6.92349	0.0230258	0.879741	1
Ca-alpha1D	555.908	522.742	555.717	607.097	616.854	451.771	546.08	535.586	536.885	524.919	0.13937	9.11176	1.74638	0.18979	0.886663
Ca-alpha1T	767.074	781.307	786.506	919.233	788.599	584.001	743.108	748.784	761.581	707.49	0.189872	9.78961	2.67682	0.105424	0.808604
Ca-beta	275.555	259.687	299.875	312.136	312.587	242.387	282.461	308.054	279.379	270.358	0.0785828	8.16195	0.613015	0.435777	1
CaBP1	48.792	49.7672	75.1584	34.3499	37.7363	58.7936	54.5165	58.8657	63.2994	50.7768	-0.227129	5.5527	2.68646	0.104809	0.808604
cac	441.527	459.691	537.497	543.375	465.018	367.842	476.562	442.865	531.251	478.205	0.0918428	8.93491	0.775946	0.380806	1
cact	145.976	141.069	167.398	131.177	145.597	141.192	146.902	122.306	151.455	130.891	0.0761855	7.15203	0.673304	0.41414	1
cactin	15.5974	19.2707	12.5264	8.2141	8.61694	7.21259	17.5624	7.01508	15.2449	17.1513	-0.000846522	3.95013	1.10967e-05	0.99735	1
cad	1.1998	2.24513	0.759176	3.9826	2.37709	1.52994	1.28059	2.13502	0.662821	1.57972	0.60994	1.36677	1.03518	0.311896	0.941762
Cad74A	6.79888	6.36122	5.69382	5.72498	6.23986	4.80839	5.48824	7.62509	6.2968	6.99592	-0.00639125	3.10794	0.00123234	0.972077	1
Cad86C	18.397	14.5934	19.359	12.6945	12.7768	10.7096	18.4771	16.4702	11.5994	14.6689	0.0885512	3.96245	0.279988	0.734291	1
Cad87A	79.5869	88.1215	90.342	89.3595	96.2721	67.7546	93.3001	82.0459	81.1955	81.0172	0.130853	6.466	2.59246	0.110989	0.808604
Cad88C	1.1998	1.12257	0.379588	0.995649	1.48568	1.52994	1.28059	0.305003	0	1.35405	0.119104	0.938797	0.078941	0.872956	1
Cad89D	5.19914	4.11608	2.27753	2.98695	2.37709	1.31138	4.75647	2.44003	1.98846	3.15945	0.272845	1.75696	0.647823	0.423082	1
Cad96Ca	31.1949	26.3803	28.0895	29.6206	28.2279	26.8833	27.0753	28.3653	24.5244	27.081	0.0947056	4.81902	0.781602	0.379083	1
Cad96Cb	1.99967	1.87095	2.65712	1.24456	1.78282	0.874254	1.64647	0	0.994231	1.12837	0.919105	1.059	4.79694	0.0311799	0.573092
Cad99C	37.9937	46.2124	35.6813	40.5727	27.3365	28.8504	42.0765	34.7704	36.1237	37.462	0.0724296	5.27878	0.377856	0.540354	1
CadN	281.554	317.499	305.948	364.159	314.667	232.77	298.377	298.903	313.183	283.673	0.151842	8.29205	1.99675	0.161197	0.886663
CadN2	81.9865	73.5282	68.3258	79.9008	77.5525	61.4163	80.8601	75.6409	68.9333	64.3173	0.118319	6.29508	1.63182	0.204843	0.886663
Caf1	25.1958	28.4384	21.2569	23.8956	20.2052	26.6647	26.8924	25.0103	26.8442	27.9837	-0.158341	4.79206	1.1825	0.279845	0.904359
Caf1-105	2.79954	6.17412	6.07341	4.97824	3.56563	4.37127	7.68354	3.66004	4.30833	7.67294	-0.233071	2.72014	0.436795	0.510416	1
Caf1-180	2.79954	6.9225	3.41629	3.23586	2.07995	3.27845	3.84177	2.44003	4.97115	4.73917	0.00946784	2.46432	0.000401181	0.984066	1
cag	14.3976	12.7224	10.6285	13.9391	9.80549	12.4581	10.6106	9.1501	13.5878	9.02699	0.171782	3.58228	1.41222	0.237916	0.886663
CAH1	200.767	206.552	165.5	174.985	186.304	199.548	197.577	174.462	175.316	189.115	-0.00321641	7.83682	0.00224246	0.962339	1
CAH2	189.169	179.611	178.406	185.191	159.265	179.878	174.526	184.527	180.619	167.451	0.00767532	7.41991	0.00591838	0.938855	1
CAHbeta	18.7969	19.4578	21.6365	15.1836	12.7768	25.1348	15.0012	13.1152	19.5532	22.5675	-0.127713	3.83648	0.431783	0.512846	1
cal1	27.5955	24.8836	24.6732	27.3803	19.9081	18.7965	29.2706	21.9603	30.8212	32.2715	-0.0984541	4.86139	0.395689	0.530969	1
CalpA	119.18	128.721	118.052	138.893	134.305	119.554	124.4	142.437	141.844	127.958	-0.0348398	7.00248	0.264476	0.930244	1
CalpB	63.9895	75.9604	78.1951	78.1584	67.4499	76.7157	79.0307	92.1111	89.8122	78.3091	-0.188943	6.29702	7.69316	0.00677914	0.290012
CalpC	5.19914	5.98703	9.11011	7.46737	10.1026	8.74254	8.4153	9.45511	8.94808	7.44727	-0.184551	3.2913	1.17937	0.280478	0.904921
Cals	534.312	606.935	725.772	895.835	866.746	726.068	629.318	809.479	720.486	605.711	0.0567878	9.10136	0.0912273	0.763342	1
Calx	447.526	421.711	453.608	504.047	541.679	402.157	444.73	461.165	450.055	405.086	0.131079	8.95314	2.05146	0.155636	0.886663
calypso	11.998	13.4708	8.35094	10.7032	9.21122	13.5509	17.9283	13.1152	14.5821	13.7662	-0.431081	3.74234	8.07264	0.00559409	0.261547
Cam	2929.52	2870.22	3420.47	3163.43	2578.84	2309.78	2779.79	2528.17	2951.54	2583.75	0.185944	11.4915	2.93628	0.0901643	0.776579
CaMKI	554.709	626.206	702.238	752.959	781.468	915.562	572.423	748.479	745.01	658.293	-0.0904676	9.11899	0.587782	0.44535	1
CaMKII	632.696	783.926	1090.18	1230.87	1206.67	994.463	661.15	1162.67	1091.67	823.713	0.0635734	9.60651	0.1375	0.711678	1
Camta	227.563	228.255	222.439	255.384	227.903	183.375	232.153	231.803	237.953	202.882	0.0952552	7.66584	0.870249	0.353463	0.980082
can	0.799868	0.187095	0	0	0	0.218563	0.182941	0.305003	0	0.451349	-0.428165	-0.23872	0.203107	0.653344	1
cana	24.7959	25.0707	22.7753	25.8869	23.1766	19.8893	23.4165	16.7752	26.5128	25.2756	0.123517	4.62962	0.537761	0.46533	1
CanA1	20.3966	18.3353	26.1916	20.9086	33.5764	21.2006	22.3188	22.2653	16.9019	19.408	0.213906	4.25443	2.21657	0.140145	0.862103
CanA-14F	144.376	166.888	205.357	194.898	164.316	146.437	146.17	175.377	178.962	149.397	0.139305	7.30728	1.59704	0.209692	0.886663
CanB	178.371	143.127	141.207	174.239	167.288	157.584	150.561	158.297	144.826	154.813	0.069246	7.33649	0.728916	0.395575	1
CanB2	105.183	100.844	114.256	99.5649	104.889	103.818	98.0566	87.231	111.685	90.4956	0.0940885	6.6123	1.50806	0.222741	0.886663
Cand1	58.3904	52.0123	47.0689	54.5118	51.4045	44.8055	56.163	50.3256	49.7115	52.3565	0.0543821	5.87151	0.513657	0.48173	1
Cap	60.3901	48.8317	50.4852	36.0923	32.3878	30.8174	49.76	38.1254	43.7462	41.2985	0.153971	5.59466	0.780319	0.379473	1
CAP	503.917	483.452	508.648	459.492	489.383	411.773	481.136	493.801	485.516	489.94	0.0495715	8.98902	0.401315	0.52807	1
Ca-P60A	2986.71	2234.47	2638.9	2601.63	3193.32	2367.92	1929.85	2809.69	1989.79	1877.16	0.315255	11.7682	2.94992	0.0894323	0.775899
Capa	58.7903	90.5538	72.8809	70.1932	77.2554	90.4852	105.923	88.756	58.6596	92.7523	-0.238889	6.06979	2.54955	0.113945	0.808604
CapaR	1.99967	1.12257	1.51835	0.746737	0.297136	0.874254	2.1953	0.610007	0.662821	0.677024	0.033879	0.856006	0.00501704	0.943694	1
Cap-D2	4.39928	2.05804	5.31423	4.72933	2.37709	2.18563	4.57353	3.66004	0.994231	3.15945	0.281445	2.23112	0.442388	0.507728	1
Cap-D3	15.5974	13.0966	16.3223	12.4456	13.6683	12.4581	13.3547	13.1152	12.2622	9.25266	0.222587	3.95814	3.68201	0.121515	0.819922
Cap-G	18.7969	24.1352	18.5998	19.1662	16.3425	16.3923	21.77	15.5552	23.8615	19.6337	0.00925295	4.49372	0.00338657	0.953727	1
Cap-H2	45.9924	53.322	57.3178	53.765	55.5644	49.1768	51.5895	62.5257	58.991	50.5511	-0.0313957	5.74744	0.140326	0.922135	1
Capr	112.381	115.25	100.97	90.604	77.8496	79.1199	110.131	91.8061	108.371	103.359	0.0125455	6.74775	0.00849941	0.926757	1
caps	78.787	96.5408	96.4154	111.264	108.157	90.0481	83.9701	99.1261	99.0917	91.1726	0.0886738	6.57661	0.912568	0.342075	0.966108
Caps	751.476	695.618	792.959	903.302	870.906	722.571	744.937	807.649	834.491	687.631	0.080396	9.5513	0.48522	0.48792	1
capt	169.172	172.501	157.149	151.09	164.316	151.246	164.464	176.902	176.973	175.349	-0.0525333	7.39815	0.583359	0.447061	1
capu	104.383	100.096	117.672	137.648	107.266	108.189	115.619	118.341	102.406	107.647	0.0381126	6.91229	0.132066	0.717179	1
car	33.5945	28.4384	24.2936	32.3586	22.2852	33.2216	37.1371	28.9753	35.4609	31.3688	-0.238776	4.97047	5.14534	0.0257792	0.541803
cas	0	0.187095	0	0	0	0.437127	0	0.91501	0.33141	0	-2.03802	-0.292473	2.82642	0.0966657	0.787981
Cas	29.5951	28.6255	28.4691	34.5988	31.4964	36.9372	27.4412	26.8403	22.5359	34.3026	0.0395672	4.78944	0.0356652	0.850648	1
CASK	345.543	339.015	293.042	361.669	312.884	227.962	363.87	327.269	312.52	319.104	0.0918037	8.45988	0.997612	0.320654	0.948633
casp	70.7883	65.1089	64.9096	63.4726	57.9415	71.0331	68.603	57.3407	61.6423	67.0254	-0.0195314	6.01221	0.0659296	0.797963	1
Cat	240.36	264.926	224.337	212.571	216.018	281.291	222.274	271.453	234.307	282.996	-0.157525	7.71688	1.65719	0.20139	0.886663
cathD	344.743	337.332	301.393	307.158	298.027	514.935	367.346	379.119	347.981	392.9	-0.334267	8.41005	11.0415	0.00130365	0.115715
cato	0	0	0	0	0	0	0	0	0	0	0	-1.30545	0	1	1
Catsup	45.5925	42.4705	40.6159	41.8173	40.7076	57.4822	53.4189	35.0754	50.043	51.2282	-0.232803	5.30721	4.77268	0.0315984	0.574105
caup	9.99835	11.0386	5.31423	12.9434	25.5537	8.74254	15.55	10.3701	9.6109	12.4121	0.194485	3.59455	1.22482	0.271461	0.894712
cav	3.99934	5.61284	6.83258	6.72063	3.56563	2.62276	5.67118	2.74503	3.3141	4.06214	0.513047	2.49615	3.25821	0.0745192	0.742696
caz	71.9881	86.2506	86.5461	85.3769	87.0608	81.5241	85.4336	82.9609	81.1955	83.274	0.0113536	6.24674	0.0183723	0.892494	1
cbc	19.5968	16.8385	13.2856	12.1967	14.2625	15.9551	15.3671	14.0302	13.5878	15.7972	0.0173265	3.99805	0.0161964	0.966685	1
Cbl	92.7847	101.967	102.868	106.783	118.854	82.1798	92.7513	91.196	103.731	91.1726	0.185192	6.61251	6.18558	0.0147842	0.410108
CBP	3.59941	4.11608	3.0367	3.9826	5.64558	4.37127	3.29294	3.66004	3.64551	3.38512	0.166992	2.72876	0.190836	0.663302	1
Cbp20	13.5978	11.9741	12.906	12.6945	14.8568	16.1737	17.1965	13.4202	14.9135	14.6689	-0.221585	3.99989	2.58937	0.111199	0.808604
Cbp53E	405.933	414.789	466.134	537.401	483.143	407.184	405.032	420.6	409.623	375.071	0.194019	8.77543	3.93465	0.050448	0.675075
Cbp80	41.1932	39.1028	38.3384	36.5901	35.062	35.4073	39.1494	37.5154	43.7462	39.9444	-0.0403796	5.32311	0.223939	0.637238	1
cbs	45.9924	45.0898	54.6607	36.0923	26.4451	32.1288	50.3089	34.7704	41.4263	42.8782	0.037337	5.50802	0.0691546	0.793192	1
Cbs	65.1893	70.5347	73.2605	52.2716	58.2387	76.2786	78.2989	73.2008	64.625	76.9551	-0.212909	5.67539	2.38017	0.126507	0.834562
cbt	97.5839	117.121	110.84	94.3377	91.815	108.407	107.57	92.4161	115.662	105.39	-0.0481896	6.62421	0.244894	0.621939	1
cbx	31.9947	22.8255	29.2283	34.5988	24.9594	26.009	25.2459	25.9253	26.1814	27.081	0.132336	4.76672	1.73044	0.22083	0.886663
Cby	0.399934	0.561284	1.13876	0.497824	0	0.65569	0.365883	0.610007	0	0	0.566452	-0.394328	0.509195	0.477394	1
CCAP	0.799868	1.30966	1.51835	2.48912	0.891408	1.09282	3.11	2.13502	0.994231	1.12837	-0.267297	1.23557	0.491889	0.484954	1
CCAP-R	5.19914	2.05804	2.27753	3.23586	4.75418	4.37127	3.84177	6.40507	1.98846	2.03107	-0.122675	2.01276	0.177468	0.674595	1
CCDC151	0	0.187095	0.379588	0.497824	0.297136	0	0.182941	0.610007	0	0	0.823431	-0.797355	0.679465	0.412129	1
Ccdc56	0	0	0	0	0	0	0	0	0	0	0	-1.30545	0	1	1
CCHa1	5.99901	5.05155	1.89794	4.23151	3.2685	3.05989	5.12236	5.79507	5.30256	6.31889	-0.298668	2.399	1.23099	0.270267	0.893782
CCHa1-R	6.79888	8.04507	8.73052	10.9521	13.3711	11.8024	7.86648	11.8951	7.62244	8.12429	0.028566	3.47898	0.0234551	0.878634	1
CCHa2	22.3963	49.9543	48.9669	45.5509	24.6623	124.144	46.833	46.3605	86.4981	61.6092	-0.918022	5.21891	10.0841	0.00206802	0.151055
CCHa2-R	6.39895	7.10959	3.41629	8.2141	10.3998	6.11977	7.50059	7.93009	6.95962	8.57564	-0.0380826	2.9004	0.0350044	0.926132	1
Cchl	139.577	112.257	118.811	93.8399	93.895	93.108	115.985	93.9411	97.1032	103.585	0.143249	7.05747	1.89239	0.172457	0.886663
CCKLR-17D1	8.39862	11.4128	9.4897	10.4543	16.3425	8.30541	11.5253	12.2001	14.5821	11.7351	-0.0318859	3.59733	0.0403272	0.993341	1
CCKLR-17D3	12.398	13.0966	11.0081	16.1793	13.074	15.0809	12.8059	14.0302	12.2622	11.2837	0.0165888	3.97766	0.0115137	0.914796	1
Ccm3	66.3891	75.212	85.7869	82.8878	79.0382	75.6229	62.7489	77.4709	70.9218	69.2821	0.131196	5.98781	1.34688	0.248992	0.886663
Ccn	56.7906	49.5801	49.726	59.49	44.5704	44.5869	56.5289	55.2056	55.3455	57.3214	-0.0481112	5.85112	0.289112	0.59216	1
Ccp84Aa	3.19947	2.24513	0.759176	0.746737	0.297136	0.65569	0.182941	0.610007	0.994231	0.677024	1.24294	0.501346	1.87709	0.174183	0.886663
Ccp84Ab	7.19881	3.18061	3.79588	4.23151	3.2685	4.58983	0.548824	2.13502	0.994231	6.31889	0.513974	1.31987	0.632829	0.42848	1
Ccp84Ac	0	0	0	0	0	0	0	0	0	0	0	-1.24106	0	1	1
Ccp84Ad	0	0	0	0	0	0	0	0	0	0	0	-1.04854	0	1	1
Ccp84Ae	0	0	0	0	0	0	0.182941	0	0	0	-1.51375	-1.17294	1.26656	0.265663	0.886798
Ccp84Af	0	0	0	0	0	0	0	0	0	0	0	-1.29805	0	1	1
Ccp84Ag	3.99934	2.61932	2.65712	4.23151	1.78282	1.52994	1.46353	1.52502	1.32564	1.57972	1.01593	1.99316	7.60136	0.00710335	0.294862
Ccs	8.79855	13.845	13.6652	9.45866	8.31981	12.2395	11.7082	10.0651	12.2622	12.6378	-0.115165	3.73568	0.556764	0.486759	1
Cct1	141.977	137.889	147.66	128.688	177.39	136.384	140.682	129.931	138.198	137.21	0.103259	7.25654	1.9843	0.162495	0.886663
Cct2	75.1876	92.0505	77.8155	73.9269	65.0728	77.8086	85.7995	66.7958	87.4923	79.6632	-0.0476232	6.12131	0.185034	0.668144	1
Cct5	32.7946	41.3479	30.7466	36.3412	34.7649	41.0899	42.0765	36.6004	43.4147	48.0687	-0.255727	5.46661	2.70502	0.103634	0.8059
Cctgamma	30.395	45.0898	31.1262	32.3586	34.1706	37.1558	40.7959	29.8903	36.7865	41.7498	-0.0988688	5.33523	0.385742	0.536167	1
c-cup	0	0	0	0	0	0	0	0	0	0	0	-0.936187	0	1	1
Ccz1	22.3963	19.6449	13.2856	18.9173	19.611	18.5779	21.2212	16.7752	17.2333	18.2797	0.0239072	4.2839	0.0381878	0.890867	1
cd	11.5981	7.67088	6.453	9.95649	8.02267	9.61679	8.78118	8.8451	6.2968	10.1554	-0.0214634	3.77093	0.010922	0.917006	1
CD98hc	403.134	376.434	345.425	339.765	315.261	356.04	381.067	360.514	372.505	387.935	-0.062211	8.64963	1.06508	0.304913	0.934339
Cda4	0	0.935473	1.51835	0.746737	0.594272	0.437127	0.182941	0.91501	0.33141	0.451349	0.782216	0.982132	1.35318	0.247896	0.886663
Cda5	97.5839	98.5988	98.3133	108.775	110.832	73.0002	83.6042	97.6011	85.1724	77.8578	0.303935	7.14121	7.57062	0.00721547	0.295816
Cda9	1.1998	1.87095	0.759176	1.9913	6.53699	0.874254	1.09765	0.610007	1.98846	0.451349	1.33773	0.636625	6.61204	0.0118241	0.375662
CDase	68.3887	66.9799	55.7994	64.9661	55.5644	59.8864	75.0059	65.8808	67.2763	69.0565	-0.112439	5.87697	1.29058	0.259055	0.886663
cdc14	92.3848	107.018	124.125	117.487	128.363	103.599	96.776	135.727	109.034	107.195	0.0467195	7.02542	0.426634	0.515364	1
Cdc16	14.7976	13.6579	12.1468	17.6728	19.9081	14.4252	12.44	12.8101	13.5878	13.9918	0.221082	3.89474	2.23265	0.138733	0.860586
cdc2	1.1998	2.24513	0.379588	1.9913	2.07995	0.437127	2.37824	0.305003	0.33141	0.677024	0.847424	1.39423	1.31729	0.254219	0.886663
Cdc23	7.59875	5.05155	3.0367	4.23151	6.23986	4.80839	5.3053	4.27005	6.2968	6.31889	-0.0553277	2.47053	0.0443399	0.833714	1
Cdc27	45.9924	43.0318	44.0322	37.5857	38.0334	43.2756	45.7353	32.6354	48.3859	41.9755	-0.0275743	5.59861	0.0699303	0.792063	1
cdc2c	9.99835	10.8515	10.2489	8.96084	10.994	10.9282	9.69589	7.01508	9.27949	10.8324	0.0870908	3.31233	0.117372	0.732727	1
cdc2rk	11.1982	11.2257	11.0081	7.71628	10.3998	11.1467	12.9888	13.4202	12.2622	12.1864	-0.270215	3.68698	3.71872	0.0570601	0.693637
Cdc37	35.5941	38.7286	33.0242	22.8999	16.9368	26.4462	36.2224	25.3153	35.4609	32.0458	-0.0813327	5.15592	0.180505	0.671986	1
Cdc42	86.3858	101.218	98.6929	101.805	98.6491	105.129	103.545	103.701	106.383	110.129	-0.117889	6.67131	3.33243	0.0713507	0.742696
CDC45L	15.9974	13.0966	15.1835	13.4413	11.8854	12.2395	11.7082	10.0651	11.5994	16.0229	0.157644	3.87373	0.550075	0.460281	1
Cdc5	24.396	32.7416	19.359	18.4195	20.5024	20.1078	27.4412	20.7402	29.8269	23.4702	-0.0595766	4.67973	0.121362	0.728402	1
Cdc6	0	1.49676	1.13876	1.49347	1.18854	0.65569	0.365883	0.610007	0.994231	0.225675	1.03737	0.96099	1.61572	0.207071	0.886663
Cdep	351.942	363.525	351.499	414.688	385.98	276.483	342.466	360.514	381.122	342.8	0.133816	8.58972	1.92815	0.168499	0.886663
CdGAPr	69.1886	83.6313	81.6114	90.853	87.6551	71.2517	80.8601	86.621	89.1494	78.7605	0.0272083	6.32206	0.0821305	0.775111	1
cdi	121.18	118.431	123.366	136.404	142.031	103.38	108.301	137.252	123.947	117.577	0.121785	7.01822	1.65874	0.201182	0.886663
Cdk12	50.3917	63.0509	59.5953	60.7346	60.3186	57.7007	64.9442	59.4757	64.625	63.6403	-0.0741015	5.94411	1.01364	0.335431	0.961776
Cdk4	18.7969	20.7675	22.7753	13.9391	21.6909	29.2875	20.6724	18.6052	19.8846	21.2134	-0.173249	4.35087	1.35577	0.247449	0.886663
Cdk5	20.7966	22.8255	27.3303	23.3977	26.148	31.6917	19.5747	26.5353	26.8442	21.6648	-0.0642191	4.57173	0.350228	0.579101	1
Cdk5alpha	189.169	182.043	171.194	205.601	181.55	169.824	192.454	182.087	178.63	173.77	0.0521356	7.77097	0.709193	0.402016	1
Cdk7	10.3983	8.79344	6.453	5.97389	8.31981	9.17966	8.59824	10.0651	12.2622	7.89861	-0.254854	3.21356	1.61618	0.207007	0.886663
Cdk8	5.19914	2.61932	6.07341	3.73368	2.07995	3.05989	4.20765	1.83002	2.65128	2.03107	0.419665	2.2188	2.05673	0.197182	0.886663
Cdk9	21.5964	20.5804	25.812	15.1836	16.3425	19.2336	21.953	16.7752	21.8731	18.731	0.000459175	4.40825	1.23795e-05	0.997201	1
Cdlc2	0	0	0	0	0	0	0	0	0	0	0	-1.29815	0	1	1
cdm	169.172	151.734	158.668	167.02	165.208	155.836	166.477	159.212	153.443	161.357	0.0267737	7.26105	0.231175	0.773984	1
CdsA	831.063	764.656	767.907	934.665	931.224	910.535	784.818	886.645	794.722	810.624	0.0145246	9.74586	0.0201343	0.88749	1
CecA1	0.399934	2.43223	0.759176	0.497824	2.37709	1.31138	0.548824	0	1.65705	1.57972	0.466077	2.34376	0.0792948	0.778923	1
CecA2	0.399934	0.187095	0	0.497824	0.297136	0.218563	0.182941	0	0.662821	0.677024	-0.253406	1.58751	0.013864	0.90654	1
CecB	0	0.374189	0.379588	0.497824	0.297136	0.874254	0	0	0.994231	0.902699	-0.660117	0.624845	0.162596	0.687986	1
CecC	0	0.374189	0	0	0.297136	0.65569	1.09765	0	0.662821	0.902699	-1.94385	2.00865	0.667991	0.416088	1
Ced-12	24.396	23.3868	31.5058	23.6467	23.1766	24.6977	28.3559	20.7402	29.8269	25.0499	-0.037644	4.80813	0.12859	0.720765	1
ced-6	181.97	213.849	219.022	202.615	195.218	240.42	200.504	195.812	200.503	217.325	-0.058438	7.42472	0.571471	0.451713	1
Cen	91.185	75.5862	78.9543	77.4117	58.8329	62.7277	82.5065	76.8609	80.2013	74.6983	0.016613	6.2983	0.0232629	0.879128	1
CenB1A	72.788	56.8767	66.0483	60.4857	52.2959	53.3295	66.7736	58.5607	61.9737	65.4457	0.00514596	5.98421	0.00372702	0.95146	1
CenG1A	100.383	103.837	110.84	109.521	108.157	96.1679	89.4583	102.786	112.679	85.9821	0.132094	6.85928	2.9593	0.0889329	0.773975
Cenp-C	4.39928	8.04507	3.79588	8.2141	5.64558	3.93414	7.31765	3.96505	7.95385	6.77024	0.058473	2.96348	0.0412419	0.839545	1
Cep135	10.3983	9.91601	12.906	8.46302	9.21122	9.61679	9.69589	8.23509	8.61667	9.25266	0.143329	3.4614	0.479903	0.490308	1
Cep89	0	0.374189	0	0	0	0	0	0	0	0.225675	0.835792	-1.2483	0.51828	0.47694	1
Cep97	48.792	42.0963	37.9588	39.3281	33.5764	33.0031	43.723	43.9205	48.7173	43.5552	-0.0764316	5.50172	0.485124	0.487964	1
cer	29.1952	28.8126	28.4691	22.1532	25.2566	43.4941	24.88	25.3153	29.4955	33.8512	-0.236369	4.551	2.5335	0.115073	0.808604
Cerk	77.5872	74.8378	70.2238	79.6519	92.4093	75.1858	76.8354	86.926	70.5904	75.1497	0.0379965	6.436	0.355	0.55284	1
cert	57.5905	47.3349	55.7994	55.5074	54.9702	57.4822	53.7848	52.4606	45.7346	57.9984	0.013329	5.59057	0.0309173	0.860833	1
cerv	17.5971	15.1547	14.8039	15.6815	12.7768	15.518	13.5377	13.7252	12.2622	12.6378	0.159992	3.82754	1.62504	0.223094	0.886663
Cf2	79.5869	107.018	117.672	115.246	122.123	136.384	101.532	129.626	123.285	115.545	-0.159479	6.55094	2.36625	0.127607	0.836395
Cfp1	16.3973	18.7095	26.9508	15.9304	12.7768	11.3653	19.2088	11.8951	14.9135	19.8594	0.211933	4.17625	1.33512	0.251053	0.886663
cg	231.562	225.449	217.124	228.999	243.652	188.402	231.97	220.213	210.446	226.577	0.0896544	7.79686	2.28311	0.134406	0.852657
CG10000	0	0.187095	0	0	0.297136	0	0	0	0	0	2.4178	-1.03165	3.64508	0.0789973	0.742696
CG10005	0.399934	0	0	0	0.297136	0	0	0	0.33141	0	0.917155	-0.757912	0.56262	0.476197	1
CG10011	137.577	162.024	156.77	167.767	139.357	105.785	160.988	156.162	159.408	141.272	0.0799075	7.31117	0.48836	0.48652	1
CG10013	0	0	0	0	0	0	0	0	0	0	0	-1.23566	0	1	1
CG10014	0	0	0	0.248912	0.297136	0.218563	0	0.305003	0	0	0.172959	2.43845	0.026262	0.880239	1
CG10019	19.5968	23.3868	31.5058	27.8782	23.4737	20.3264	22.6847	25.6203	25.1872	22.1161	0.12299	4.36495	0.586412	0.445878	1
CG10026	23.1962	23.761	27.7099	17.9217	21.9881	62.5091	28.173	21.9603	35.7923	27.3066	-0.627091	3.93782	9.29361	0.00304425	0.182416
CG10029	0	0	0	0	0	0	0	0	0	0	0	-1.29851	0	1	1
CG10031	23.996	32.3674	35.3017	20.9086	21.3938	57.045	22.8677	20.4352	36.1237	33.6255	-0.347434	4.59264	1.35302	0.247925	0.886663
CG10032	0	0	0	0	0	0	0	0	0	0	0	-1.29805	0	1	1
CG10035	0.399934	0.935473	1.89794	0.746737	0.891408	1.09282	0.182941	1.22001	0.994231	0.225675	0.440028	0.103006	0.489918	0.485828	1
CG10038	16.7972	14.0321	12.1468	13.1923	13.9654	14.6437	12.2571	10.0651	9.27949	14.4432	0.190089	3.57252	1.40694	0.238788	0.886663
CG10041	0.399934	0.187095	0	0.248912	0.594272	0.437127	0.182941	0	0	0.225675	0.530227	-0.747885	0.301435	0.584455	1
CG10050	5.99901	3.5548	4.17547	6.72063	5.05131	5.24552	6.03706	3.96505	6.62821	4.73917	-0.0751374	2.61481	0.112482	0.738141	1
CG10051	0.399934	0.748378	0.379588	0.248912	0.891408	0.218563	0.548824	0.610007	0.33141	0	0.666161	-0.251973	0.721514	0.397974	1
CG10053	5.59908	3.5548	5.31423	3.9826	2.67422	3.05989	3.65883	2.44003	4.63974	2.48242	0.349284	2.10231	1.61322	0.207419	0.886663
CG10055	21.5964	25.632	29.2283	23.1488	21.6909	19.4521	24.88	22.5703	26.1814	19.1823	0.115065	4.47945	0.77219	0.381956	1
CG10062	15.1975	11.5999	16.7019	15.9304	13.3711	15.7366	12.9888	13.7252	12.2622	13.9918	0.068419	3.60266	0.168082	0.775109	1
CG10063	0	0	0	0	0	0	0.182941	0	0	0	-1.51407	-1.08449	1.33606	0.265234	0.886663
CG10064	0	0	0	0	0	0.218563	0	0	0	0	-1.53294	-0.831863	1.26449	0.265234	0.886663
CG10068	21.9964	26.1932	33.7833	27.8782	27.0394	33.4402	23.5994	29.5853	21.8731	23.2445	0.0530617	4.5937	0.19825	0.657241	1
CG10073	0.399934	0.187095	0	0	0.594272	0.65569	0.182941	0	0	0	0.239073	-0.417945	0.0444756	0.833463	1
CG10075	23.1962	22.2643	22.0161	20.9086	15.4511	21.8563	16.6477	18.9102	19.2218	22.3418	0.0673722	4.46526	0.321494	0.572168	1
CG10077	2573.58	2665.54	2983.56	3218.19	3263.44	2908.86	2775.95	3208.94	2828.26	2720.51	0.0259675	11.2953	0.0792021	0.779049	1
CG10081	0	0	0	0	0	0	0	0	0	0	0	-1.29808	0	1	1
CG10082	424.73	426.763	437.285	373.866	373.5	355.165	390.031	373.019	378.471	387.483	0.111603	8.60236	2.92945	0.0905331	0.77738
CG10086	0	0	0	0	0.891408	0	0	0	0	0	2.96475	-1.05947	3.39091	0.0750897	0.742696
CG10089	67.9888	65.6702	63.7708	79.403	73.9869	66.2247	70.6154	79.3009	61.9737	63.6403	0.0393469	6.12206	0.188133	0.665547	1
CG10092	12.7979	11.2257	13.2856	13.1923	15.7482	13.5509	11.8912	14.0302	13.2564	9.70401	0.0862194	3.99127	0.537627	0.532117	1
CG10096	0	0	0	0	0	0	0	0	0	0	0	-1.30545	0	1	1
CG10097	0	0	0	0	0	0	0	0	0	0	0	-1.30545	0	1	1
CG10098	39.9934	37.606	38.718	46.2977	43.0847	48.7396	46.1012	44.8355	41.4263	43.3295	-0.126956	5.54119	2.27591	0.135014	0.853508
CG10103	80.3868	72.9669	69.8442	72.6824	80.821	85.8954	66.9565	76.2509	72.2474	81.0172	-0.0225457	6.15732	0.0816081	0.775808	1
CG10104	0	0	0	0	0	0	0	0	0	0	0	-1.28358	0	1	1
CG10116	0.799868	0.374189	0.759176	0	2.97136	1.09282	1.46353	0.610007	0.994231	0.677024	-0.0709034	0.183912	0.0154091	0.901495	1
CG10126	39.5935	40.7866	36.0609	47.7911	37.142	43.4941	48.8453	40.2605	42.7519	46.7147	-0.139836	5.26568	1.56018	0.214983	0.886663
CG10131	5.19914	7.48378	9.11011	7.21845	5.34845	15.0809	11.1594	9.76011	10.2737	16.6999	-0.877196	3.58612	14.4317	0.000268381	0.0387001
CG10132	109.182	114.876	114.636	106.037	99.2434	98.7906	134.462	108.276	122.953	113.514	-0.0878895	6.94382	0.762905	0.384821	1
CG10133	7.19881	5.61284	9.11011	5.22716	4.75418	6.5569	10.6106	8.8451	6.2968	6.31889	-0.316937	2.89973	3.1783	0.0781032	0.742696
CG10137	85.186	75.5862	64.9096	69.6954	74.8783	63.1648	77.0183	86.316	80.8641	72.8929	-0.036728	6.34091	0.263305	0.662547	1
CG10139	13.9977	13.845	15.5631	15.1836	15.4511	17.7036	17.7453	14.0302	11.5994	14.2175	-0.0398622	4.05346	0.0771765	0.781819	1
CG10140	0.399934	0.374189	0.379588	0.248912	0.297136	0.218563	0.182941	0	0.662821	0.225675	0.421149	-0.91156	0.2541	0.615536	1
CG10144	21.9964	17.3998	21.2569	24.1445	18.1253	20.7635	21.4041	21.6552	20.5474	19.8594	-0.023879	4.55439	0.0459895	0.830696	1
CG10147	12.7979	13.0966	12.5264	17.4239	16.0453	12.8952	12.0741	13.1152	13.9192	18.5053	0.0344734	3.54101	0.0405413	0.840895	1
CG10151	22.7962	25.0707	20.1182	17.9217	19.0167	15.0809	24.6971	26.5353	15.9077	21.4391	0.0182468	4.60787	0.019101	0.890396	1
CG10154	0	0	0	0	0	0	0	0	0	0	0	-1.30545	0	1	1
CG10157	17.1972	23.9481	15.1835	18.1706	15.4511	38.9043	17.7453	13.7252	26.5128	24.5985	-0.420632	3.75936	2.7409	0.101406	0.799164
CG10158	18.397	20.3933	17.461	16.926	16.9368	17.0479	19.5747	14.6402	14.2506	21.6648	0.0399049	4.26453	0.095216	0.80493	1
CG10163	0	0	0	0	0.891408	0	0	0	0	0	2.96539	-1.22641	4.31139	0.0452281	0.649053
CG10164	0	0.187095	0	0	0	0	0.182941	0	0	0	0.133552	-1.24807	0.0118207	0.915156	1
CG10165	6.79888	8.23216	12.1468	6.22281	9.21122	13.7695	7.86648	7.32008	8.94808	9.02699	-0.158716	3.10834	0.628307	0.430129	1
CG10166	20.7966	23.1997	18.5998	16.6771	16.0453	24.9162	23.0506	18.3002	13.9192	20.9877	-0.0956804	4.18526	0.562852	0.455134	1
CG10168	0	0	0	0	0	0	0	0	0	0	0	-1.28375	0	1	1
CG10170	0	0	0	0	1.48568	0.218563	0	0	0	0	2.104	-1.00613	2.62673	0.113101	0.808604
CG10171	11.998	14.5934	17.461	14.4369	14.5597	20.9821	12.2571	16.4702	14.5821	15.3459	-0.123106	3.79855	0.66466	0.417141	1
CG10175	36.7939	53.8832	31.8854	43.5596	28.5251	50.7067	55.0653	58.5607	46.7289	50.7768	-0.411952	6.0865	6.19402	0.0147186	0.410108
CG10176	14.7976	24.5094	20.1182	25.638	33.8735	27.1019	18.1112	31.4154	19.2218	24.3729	0.00257257	4.36257	0.000177738	0.989394	1
CG10177	0.399934	0	0.379588	0.746737	0.297136	0.65569	0.914707	0.305003	0	0.451349	-0.524116	-0.061879	0.5846	0.44658	1
CG10178	30.395	36.1093	33.7833	24.1445	23.7709	40.6528	22.1359	25.0103	23.8615	28.435	0.0776016	4.86079	0.175069	0.676674	1
CG10182	0	0	0	0	0	0	0	0	0	0	0	-0.962565	0	1	1
CG10183	0	0	0	0	0	0.874254	0	0.305003	0	0	-3.39499	-1.09625	6.23844	0.0148139	0.410252
CG10184	9.99835	12.3482	15.1835	11.9478	7.72554	14.6437	12.8059	12.2001	11.2679	8.80131	-0.0656548	3.53662	0.11947	0.730443	1
CG10185	69.5885	38.1673	77.0564	105.788	94.1921	75.1858	26.8924	59.4757	56.3397	49.1971	0.528497	4.85916	0.589681	0.444618	1
CG10186	1476.56	1406.2	1312.24	1282.15	1212.61	1227.89	1492.98	1320.97	1310.73	1397.15	-0.0129893	10.4472	0.0272923	0.869166	1
CG10188	103.583	103.463	100.211	97.5736	93.5978	81.3056	95.1295	94.5511	110.691	99.5225	0.0524304	6.77495	0.411588	0.522848	1
CG10189	23.5961	22.4513	21.2569	20.4108	25.2566	19.6707	18.843	17.3852	20.216	23.0188	0.185399	4.01575	1.81232	0.18172	0.886663
CG10194	12.398	12.7224	12.906	13.1923	19.3138	19.2336	13.7206	12.5051	15.9077	12.1864	-0.0607377	3.92168	0.179577	0.67278	1
CG10195	15.9974	14.7805	12.1468	13.6902	15.4511	22.7306	12.623	15.2502	16.9019	14.6689	-0.186378	3.95767	1.81216	0.18174	0.886663
CG10202	0	0	0	0	0	0	0	0.305003	0	0	-1.55924	-0.661446	1.51689	0.265234	0.886663
CG10205	50.7916	57.0638	52.3831	38.5814	44.5704	56.1708	55.6142	60.0857	51.0372	58.2241	-0.208511	6.25391	2.77316	0.0994469	0.794388
CG10208	5.59908	7.67088	7.97135	7.71628	8.02267	10.491	7.68354	5.49006	9.6109	9.25266	-0.19614	2.85512	1.08818	0.299759	0.926987
CG10209	18.397	16.2772	14.8039	11.45	9.80549	12.8952	15.9159	12.2001	13.9192	14.6689	0.00952659	4.06542	0.00307339	0.963066	1
CG10211	50.7916	68.2895	57.3178	56.5031	58.5358	70.8145	102.63	93.9411	74.5673	69.9592	-0.494623	6.27049	10.1408	0.00201182	0.147877
CG10214	11.5981	16.6514	13.6652	14.9347	15.1539	12.021	12.44	11.2851	12.5936	17.8283	0.131424	3.75384	1.00235	0.319513	0.948584
CG10217	44.3927	49.0188	50.1056	40.5727	51.4045	55.078	49.0283	53.6806	44.409	51.9052	-0.111332	5.68205	1.87804	0.174076	0.886663
CG10219	149.975	143.502	136.652	150.592	149.757	163.485	135.742	166.532	116.988	122.09	0.0514572	7.37345	0.163418	0.687019	1
CG10222	12.398	4.11608	7.21217	6.72063	5.94272	6.11977	4.75647	4.27005	3.3141	6.31889	0.479868	2.64265	4.25579	0.0458253	0.651448
CG10226	199.567	166.888	167.778	185.191	150.351	175.506	184.039	157.382	156.426	171.287	0.040248	7.25651	0.201218	0.654853	1
CG10232	1.59974	0.748378	0	0.746737	0	0.65569	0.182941	0.305003	0.662821	1.12837	0.071207	0.473712	0.0107234	0.917761	1
CG10237	136.378	137.515	138.17	117.735	112.912	157.366	135.56	173.242	138.198	148.043	-0.227462	7.20554	3.96067	0.0497086	0.6729
CG1024	17.997	14.0321	14.4243	9.95649	12.7768	13.1138	14.6353	12.8101	14.5821	11.7351	0.0338905	3.9177	0.0623313	0.928368	1
CG10249	112.381	104.399	110.84	101.307	106.672	118.68	99.3371	121.696	109.697	112.386	-0.0693572	6.99613	1.43783	0.23374	0.886663
CG10252	0	0.187095	0.379588	0.497824	0	0	0	0	0	0	3.28894	-0.981903	6.17037	0.0153461	0.418917
CG10253	47.1922	43.4059	48.9669	39.577	52.2959	40.8714	46.65	41.1755	40.7635	41.2985	0.128866	5.55793	2.23001	0.153611	0.886663
CG10254	74.7877	85.128	72.1217	84.3812	91.815	76.9343	83.9701	82.0459	80.5327	78.0834	0.0268645	6.53951	0.0544274	0.816078	1
CG10257	21.9964	19.2707	16.3223	23.1488	17.8282	17.0479	14.0865	16.4702	15.5763	23.0188	0.194211	4.37351	2.10575	0.150336	0.881926
CG10262	5.59908	9.54182	4.55506	7.96519	8.02267	9.39823	8.4153	6.10007	6.95962	7.67294	-0.0833455	3.19087	0.197862	0.753014	1
CG10264	0	0	0	0	0	0	0	0	0	0	0	-1.24029	0	1	1
CG10265	9.19848	9.35473	10.6285	8.46302	5.94272	6.99403	10.7935	7.93009	10.9365	6.31889	0.0192692	3.22879	0.0110882	0.916379	1
CG10268	16.7972	11.2257	6.83258	6.96954	5.94272	9.83535	9.14707	9.1501	9.94231	8.80131	0.0142036	3.15318	0.00628543	0.948233	1
CG10274	12.398	13.845	12.5264	14.188	15.7482	13.5509	17.9283	10.9801	15.9077	16.6999	-0.129334	3.91405	0.729359	0.395432	1
CG10280	0	0.187095	0	0	0	0	0	0	0	0.225675	0.111163	-1.24843	0.0105403	0.918752	1
CG10283	51.5915	48.4575	45.171	47.7911	47.5418	39.1228	49.2112	43.3105	48.7173	41.7498	0.115487	5.66142	1.7246	0.192549	0.886663
CG10286	13.1978	12.7224	11.3876	9.45866	9.80549	11.3653	12.9888	7.62509	11.5994	12.4121	0.000257335	3.60222	1.79816e-06	0.998933	1
CG10289	160.374	155.476	191.692	175.234	190.761	136.384	153.305	165.617	180.95	151.653	0.149614	7.25068	2.403	0.124725	0.828738
CG10298	0	0	0	0	0	0	0.182941	0	0	0.225675	-2.24006	-1.27746	3.64058	0.115122	0.808604
CG10300	0	0	0	0	1.78282	0.218563	0	0	0	0	2.35204	-1.02446	4.13724	0.0464401	0.656952
CG10301	0.399934	0	0	0	0	0.218563	0.365883	0	0	0.225675	-1.3416	-0.950722	1.28165	0.261191	0.886663
CG10306	119.58	127.786	116.534	86.3725	80.5239	98.7906	105.374	88.146	96.7718	113.966	0.0751032	6.796	0.543416	0.463	1
CG10307	34.7943	32.5545	39.4772	22.4021	26.7422	23.6048	25.4288	32.9404	23.8615	23.4702	0.264651	5.10287	2.88526	0.0929599	0.78189
CG10311	70.3884	75.212	61.1137	73.9269	83.4952	85.0212	71.713	79.3009	70.5904	74.4727	-0.0631486	6.19721	0.326004	0.569491	1
CG10317	0	0	0.759176	0	0.297136	0.218563	0	0.91501	0	0.225675	-0.444132	-0.886531	0.179526	0.67322	1
CG10320	155.974	120.115	127.162	92.0975	93.895	107.533	109.216	90.586	85.8353	96.3631	0.260228	6.99346	3.73542	0.0565169	0.690829
CG10321	51.9914	56.8767	50.4852	46.0488	41.599	43.7127	49.2112	46.9705	51.7	58.9011	-0.0188016	5.70899	0.0314357	0.951553	1
CG10324	5.99901	6.9225	4.55506	6.22281	5.05131	6.11977	6.76883	4.88006	8.28526	4.06214	-0.0389242	2.84345	0.0191482	0.890262	1
CG10326	93.1846	79.8894	76.2972	82.3899	77.5525	70.8145	82.5065	71.6758	77.8814	77.6321	0.10313	6.37914	2.09096	0.151759	0.884483
CG10332	0	0	0	0	0	0	0	0	0	0	0	-1.30545	0	1	1
CG10333	27.1955	30.4964	36.0609	23.6467	24.9594	19.8893	33.8441	24.7053	23.5301	27.9837	0.119798	5.00522	0.676358	0.413087	1
CG10336	1.99967	2.43223	1.51835	0.746737	0.594272	1.96707	1.64647	0.610007	1.32564	1.57972	0.0131042	1.26183	0.000664522	0.979493	1
CG10337	1.59974	2.43223	4.93464	3.9826	3.86277	6.11977	3.11	3.66004	3.97692	3.15945	-0.257392	1.62132	0.594989	0.442582	1
CG10338	17.5971	24.3223	17.461	19.6641	22.2852	33.2216	18.843	22.5703	20.8788	20.085	-0.178244	4.33532	2.20097	0.142653	0.867959
CG10339	10.7982	7.10959	7.21217	10.7032	7.72554	7.86828	6.58589	7.01508	6.62821	5.41619	0.369146	3.15341	3.24561	0.0750722	0.742696
CG10340	45.1926	39.1028	41.3751	28.8738	28.5251	30.5989	33.1124	32.9404	32.8096	27.5323	0.215304	5.26226	3.15351	0.0792534	0.74309
CG10341	15.1975	14.9676	14.0448	9.70758	16.3425	12.4581	13.5377	14.0302	16.5705	15.5716	-0.0378141	3.77181	0.0530865	0.818317	1
CG10343	6.79888	10.2902	12.906	11.45	8.61694	8.08685	11.1594	9.1501	11.9308	12.4121	-0.0668642	3.54069	0.135979	0.713206	1
CG10344	2.79954	3.5548	3.41629	4.23151	5.05131	6.33834	6.22001	3.35504	4.97115	3.15945	-0.337122	2.11379	1.36967	0.245058	0.886663
CG10345	94.7844	86.0635	84.2685	71.9356	78.741	112.997	84.5189	104.921	91.4692	79.6632	-0.18891	6.47468	1.07047	0.303701	0.932827
CG10347	15.5974	19.2707	11.3876	19.4152	17.2339	26.2276	20.8553	17.6902	20.8788	21.2134	-0.351277	4.38572	7.75853	0.00655774	0.281983
CG10348	6.39895	6.17412	6.83258	4.23151	6.53699	3.93414	4.02471	6.10007	3.64551	6.09322	0.333344	2.47781	2.08734	0.152109	0.885599
CG10352	31.5948	22.8255	17.461	29.6206	27.0394	20.545	18.66	17.0802	21.5417	15.5716	0.462059	4.03851	9.31111	0.00301813	0.181722
CG10353	141.177	139.573	142.346	141.88	144.408	141.629	160.622	151.282	146.815	174.221	-0.127545	7.54977	3.32843	0.0715177	0.742696
CG10357	0	0.374189	3.0367	0	8.02267	2.84132	0.182941	12.2001	0.33141	0	-0.404594	1.26081	0.119778	0.730149	1
CG10359	8.39862	4.30318	6.07341	7.71628	5.34845	8.74254	8.4153	10.3701	6.2968	6.99592	-0.388375	3.46047	3.46819	0.0659284	0.740504
CG10361	6.79888	8.04507	8.35094	5.22716	5.94272	18.7965	11.8912	6.40507	9.27949	9.70401	-0.72659	2.997	7.65588	0.00690892	0.291832
CG10362	88.7854	80.6378	75.9176	71.4378	71.0155	65.1319	78.116	81.4359	91.1378	72.8929	-0.00193293	6.47814	0.000597865	0.980549	1
CG10365	49.1919	47.7091	54.6607	41.0705	62.3986	52.2366	47.3818	51.8506	44.7404	47.843	0.0594407	5.61501	0.332686	0.565568	1
CG10366	22.7962	21.1417	19.7386	14.188	17.531	16.6108	21.0383	20.4352	17.8962	23.9215	-0.0758694	4.43305	0.326694	0.569083	1
CG10375	27.9954	18.7095	19.359	17.4239	17.2339	20.3264	22.1359	19.2152	21.5417	19.1823	-0.0395408	4.40598	0.0880526	0.767373	1
CG10376	36.394	35.7351	40.6159	38.3325	36.8449	40.6528	44.4547	33.8554	45.7346	35.2053	-0.0913665	5.08569	0.881476	0.350392	0.977323
CG10383	39.5935	35.1738	51.624	38.0836	120.34	31.4731	25.9777	24.7053	30.4897	28.435	1.00934	5.54183	24.1119	4.20655e-06	0.00140726
CG10384	103.583	89.8054	96.4154	101.307	93.3007	95.7308	99.5201	96.3811	87.8237	99.0712	0.0151192	6.76053	0.0308625	0.889314	1
CG10395	15.1975	19.4578	20.4978	17.6728	15.4511	20.9821	15.1841	16.1652	20.216	16.9256	-0.0115189	4.07598	0.0047239	0.945361	1
CG10396	0.399934	0.374189	0	0	0.297136	0	0.182941	0	0.33141	0	1.01093	-0.744841	0.893741	0.347078	0.972785
CG10399	5.59908	6.9225	5.31423	4.48042	4.45704	5.68265	5.3053	4.57505	5.63397	4.51349	0.06835	2.25751	0.0717539	0.789433	1
CG10405	0	0	0	0	5.64558	0	0	0	0	0	5.50449	-0.89003	17.8083	6.75525e-05	0.013139
CG10407	11.998	6.36122	6.07341	7.46737	5.34845	5.24552	6.58589	3.66004	6.95962	5.41619	0.386477	2.8238	2.22037	0.13981	0.862103
CG1041	31.5948	37.4189	35.6813	34.101	29.4165	53.7666	33.2953	29.5853	32.1468	34.9796	-0.129982	4.94796	1.36541	0.245787	0.886663
CG10413	76.7874	81.7603	79.7135	95.8312	103.106	109.5	81.226	98.8211	84.841	85.0794	-0.0694905	6.50155	0.383866	0.537158	1
CG10417	105.183	109.45	110.84	136.155	118.854	129.39	115.436	110.106	107.708	104.262	0.0346424	6.71051	0.116583	0.733593	1
CG10418	6.79888	6.54831	4.17547	4.23151	2.67422	4.37127	4.20765	7.62509	4.97115	4.73917	-0.0563512	2.52509	0.0572771	0.972281	1
CG10420	14.7976	16.0901	30.367	18.4195	18.4224	21.2006	12.8059	16.1652	15.9077	15.5716	0.253096	4.08094	3.09351	0.0821141	0.75549
CG10424	14.3976	19.2707	19.7386	13.6902	13.074	29.2875	20.1235	18.9102	14.9135	23.0188	-0.413404	3.99328	9.30972	0.00302019	0.181722
CG10425	13.9977	14.4063	12.1468	16.4282	16.0453	15.518	14.4524	17.3852	14.9135	15.1202	-0.0731468	3.99182	0.331809	0.643329	1
CG10426	28.3953	24.3223	32.265	31.6119	27.9308	29.0689	29.4536	29.5853	25.85	30.0147	-0.00266913	5.04272	0.000819286	0.977231	1
CG10428	28.7953	22.2643	22.7753	25.8869	26.148	22.512	22.5018	22.8753	25.5186	23.9215	0.0987925	4.80932	0.959347	0.344255	0.969485
CG10431	2.79954	4.67736	4.55506	3.48477	4.45704	2.84132	3.11	3.66004	4.30833	3.38512	0.237967	1.99759	1.06176	0.305664	0.93512
CG10433	317.948	379.428	390.217	305.913	306.05	435.16	348.686	322.694	336.05	347.99	-0.0756578	8.17585	0.405743	0.525807	1
CG10435	33.9944	33.8641	29.9875	22.4021	26.148	27.1019	35.1247	28.0603	32.1468	28.8864	-0.0517131	4.95877	0.20165	0.654507	1
CG10440	39.1935	34.0512	31.5058	36.3412	39.8162	29.7246	32.5636	37.2104	34.7981	32.2715	0.121804	5.22692	1.56296	0.214577	0.886663
CG10444	87.1856	80.2636	65.2891	86.3725	90.0322	88.5182	73.7254	78.0809	77.8814	78.9861	0.0439083	6.05944	0.124501	0.725055	1
CG10445	0.399934	1.30966	2.27753	1.24456	1.18854	1.96707	0.731765	0.91501	2.65128	1.12837	-0.157542	0.7218	0.103983	0.771248	1
CG10459	1.59974	0.935473	0.379588	2.24021	0.594272	2.4042	0.914707	2.44003	1.65705	2.7081	-0.774762	0.120563	2.22529	0.139377	0.86155
CG10462	33.9944	37.2318	29.6079	35.8434	38.6277	37.5929	30.1853	31.7204	34.7981	34.9796	0.0562163	5.08498	0.244328	0.622341	1
CG10463	4.39928	5.42574	5.31423	4.48042	4.1599	5.02696	4.57353	3.35504	3.97692	6.31889	0.0207155	2.57287	0.008511	0.94611	1
CG10465	61.1899	66.0444	60.7341	77.1628	72.7983	72.563	66.5906	71.9808	69.5962	65.6713	-0.0318383	5.92573	0.0739388	0.786329	1
CG10466	5.99901	7.67088	6.83258	3.73368	6.23986	5.24552	4.02471	5.18506	2.98269	4.96484	0.4358	2.41575	4.72538	0.0324312	0.574612
CG10467	15.5974	13.845	9.11011	8.96084	11.2912	15.0809	16.0988	8.8451	15.5763	14.2175	-0.25643	3.4847	2.90241	0.0920098	0.780973
CG10469	5.19914	3.92899	7.59176	4.72933	5.34845	5.46408	4.75647	5.18506	4.30833	7.44727	-0.0544966	2.11166	0.0565197	0.812642	1
CG10470	16.7972	17.774	14.8039	15.1836	19.0167	21.2006	19.5747	20.4352	16.2391	19.1823	-0.209405	4.40374	2.34961	0.128935	0.839183
CG10472	5.19914	2.43223	3.79588	3.48477	3.2685	5.90121	4.02471	4.57505	3.64551	4.73917	-0.387942	2.56379	1.30527	0.256382	0.886663
CG10474	0	0	0	0	0	0	0	0	0	0	0	-1.29821	0	1	1
CG10476	0	0	0	0	0	0	0	0	0	0	0	-1.30545	0	1	1
CG10477	0	0.187095	0.379588	0	0.297136	0.218563	0	0	0.994231	0.451349	-0.746636	-0.229619	0.416618	0.520967	1
CG10479	37.5938	33.4899	29.9875	28.376	18.4224	26.2276	32.7465	25.9253	29.1641	31.8201	0.0129472	4.79414	0.00969973	0.980267	1
CG10481	0	0	0	0	0	0	0	0	0	0	0	-1.29879	0	1	1
CG10483	48.392	43.2188	44.0322	42.564	45.4618	33.6588	41.7106	40.5655	39.1064	42.2012	0.178673	5.55017	4.7983	0.0311568	0.573092
CG10486	0	0	0.379588	0	0	0.874254	0	0	0	0	-1.37137	-1.05922	1.3471	0.249458	0.886663
CG10492	60.3901	59.309	52.7627	51.027	58.5358	50.2696	57.6265	57.9507	56.0083	57.0957	0.0161923	5.85315	0.0388093	0.844285	1
CG10494	6.79888	7.48378	7.97135	6.72063	6.23986	6.99403	8.59824	8.23509	8.61667	7.67294	-0.18476	3.01404	0.827251	0.365577	0.993062
CG10495	4.39928	4.30318	3.0367	5.22716	4.1599	4.58983	4.02471	4.57505	4.63974	3.6108	0.00291716	2.47323	0.00012967	0.990941	1
CG10505	1.99967	1.49676	2.27753	1.74239	2.67422	1.09282	2.01235	2.74503	1.32564	1.8054	0.158518	1.53812	0.198519	0.686689	1
CG10508	129.179	105.708	94.897	102.303	95.6778	97.0421	108.85	101.261	96.7718	107.873	0.0417544	6.89505	0.384621	0.614612	1
CG10510	0	0	0	0	0	0	0	0	0	0	0	-1.23652	0	1	1
CG10512	37.9937	51.2639	55.0403	47.2933	51.4045	87.8625	46.1012	47.2755	39.1064	49.6484	-0.155183	5.52364	1.00613	0.318609	0.948584
CG10513	30.7949	20.5804	23.5345	29.3716	27.3365	22.0749	19.5747	19.8252	18.8904	18.9567	0.396655	4.63784	5.94627	0.0167773	0.445449
CG10514	9.19848	9.16763	8.73052	13.1923	9.21122	9.39823	10.4277	10.3701	10.9365	10.381	-0.0468678	2.9165	0.0566891	0.819202	1
CG10516	11.1982	15.5288	17.0815	12.6945	8.61694	19.6707	16.0988	14.0302	19.2218	19.1823	-0.433479	3.85536	3.7801	0.0550902	0.68587
CG10527	226.763	222.268	176.888	175.234	187.196	272.767	235.811	241.563	246.569	251.627	-0.336851	7.74114	11.2719	0.00116788	0.109748
CG10543	74.7877	96.5408	90.342	87.6171	90.3293	81.3056	96.9589	89.366	95.4462	88.4645	-0.0354655	6.5047	0.117826	0.73223	1
CG10550	190.769	188.591	180.304	153.828	147.677	189.494	199.223	162.262	166.699	196.788	-0.0886299	7.29341	1.146	0.287343	0.913764
CG10553	5.59908	8.04507	11.7672	9.20975	8.02267	6.5569	6.76883	15.8602	10.9365	11.2837	-0.23733	4.06222	0.82127	0.367307	0.994737
CG10555	35.5941	42.8447	31.5058	47.7911	44.5704	39.56	42.0765	44.8355	41.4263	36.5593	-0.00441243	5.34073	0.00186777	0.965627	1
CG10559	1.1998	2.24513	2.65712	1.49347	3.56563	2.84132	2.56118	2.74503	3.64551	2.03107	-0.283896	1.32977	0.902417	0.367482	0.99487
CG10560	28.7953	31.0577	28.8487	29.1227	24.9594	33.4402	29.4536	37.2104	25.5186	28.8864	-0.111304	4.82432	0.393286	0.532216	1
CG10561	53.1912	46.7736	47.4485	49.0357	51.1074	49.6139	46.4671	52.7656	45.7346	46.489	0.0369489	5.74887	0.165826	0.684846	1
CG10562	6.39895	8.79344	9.86929	9.45866	10.994	12.021	10.0618	11.5901	9.6109	9.47834	-0.204997	3.6514	1.55509	0.215725	0.886663
CG10565	71.5882	73.9024	79.7135	53.0183	58.8329	55.7337	81.5918	51.5456	63.2994	71.0875	0.0527481	6.22722	0.126308	0.723149	1
CG10566	37.9937	36.8576	31.5058	32.3586	17.8282	29.5061	32.1977	35.0754	36.7865	31.1431	-0.0680294	5.18292	0.257138	0.613374	1
CG10570	0	0	0	0	0	0	0	0	0	0	0	-1.30545	0	1	1
CG10576	71.1883	88.3086	83.889	61.9791	67.4499	101.851	87.263	71.3708	87.8237	79.8888	-0.20028	6.33279	1.85435	0.176788	0.886663
CG10581	5.59908	6.17412	4.55506	2.73803	3.56563	5.02696	6.40295	3.96505	4.63974	5.64187	-0.196354	2.43318	0.7808	0.379327	1
CG10584	13.5978	13.845	14.8039	12.9434	17.8282	13.9881	14.0865	11.8951	11.5994	13.7662	0.149272	3.79373	1.22162	0.31397	0.943206
CG10585	36.394	28.2513	24.2936	27.1314	23.7709	29.7246	29.8194	30.8054	32.1468	22.5675	-0.0539337	4.94229	0.311415	0.578244	1
CG10587	0	0	0	0	0	0	0	0	0	0	0	-1.30545	0	1	1
CG10588	0	0	0	0	0	0	0.182941	0	0	0	-1.51363	-1.20137	1.6411	0.265234	0.886663
CG10589	0	0	0	0	0	0	0	0	0	0	0	-1.25546	0	1	1
CG10590	33.5945	34.4254	41.7547	41.3194	49.0274	50.4881	37.32	41.1755	42.7519	42.6525	-0.0996866	5.34357	1.29965	0.2574	0.886663
CG10591	0.399934	0	0	0	0.297136	0	0.182941	0.305003	0.33141	0.225675	-0.644522	-1.1336	0.368213	0.54689	1
CG10592	0	0	0	0	0	0	0	0.305003	0	0.225675	-2.28277	-0.567114	2.32825	0.134338	0.852657
CG10597	0.399934	0	0	0	0	0	0	0	0	0	1.72094	-1.22699	2.0782	0.214216	0.886663
CG10598	0	0	0	0	0	0	0	0	0	0	0	-1.27041	0	1	1
CG10600	83.1863	87.3732	83.5094	79.9008	79.6324	63.8205	83.4213	71.6758	80.8641	77.6321	0.132472	6.31957	2.17994	0.143423	0.869846
CG10602	65.9891	62.6767	50.4852	57.2498	49.3246	74.3116	67.3224	68.3208	63.9622	63.4146	-0.239241	5.93946	8.47213	0.00457699	0.229908
CG10616	28.3953	28.8126	29.2283	27.3803	28.8222	33.6588	25.2459	25.3153	25.85	27.3066	0.0509534	4.82261	0.259367	0.61587	1
CG10621	55.9908	48.2704	58.8361	27.1314	32.9821	100.758	11.3424	35.6854	40.7635	33.1742	-0.0017563	5.50022	1.81578e-05	0.99661	1
CG10623	26.3957	29.5609	34.1629	34.101	31.4964	26.4462	32.1977	25.9253	26.1814	27.758	0.1653	4.96352	2.52292	0.115823	0.809324
CG10625	4.79921	2.05804	5.69382	1.9913	4.45704	3.71558	3.47589	2.44003	1.98846	2.7081	0.303914	1.99888	1.02532	0.456109	1
CG10628	13.1978	11.0386	11.7672	10.7032	9.21122	10.9282	12.9888	7.32008	11.2679	8.57564	0.109767	3.69959	0.395086	0.583075	1
CG10631	146.776	159.966	147.28	186.186	154.214	118.461	163.55	150.977	162.722	162.486	0.0693454	7.34753	0.472771	0.49354	1
CG10635	21.9964	24.1352	18.2202	14.9347	15.1539	16.1737	23.0506	14.3352	17.5647	22.5675	0.003896	4.40328	0.000505312	0.982117	1
CG10638	58.7903	56.6897	46.3097	61.4813	53.4845	58.3564	53.4189	68.3208	58.991	69.0565	-0.150892	5.41327	1.70377	0.195231	0.886663
CG10639	39.9934	38.9157	42.8934	27.8782	35.6563	46.7726	39.1494	32.0254	33.141	35.2053	-0.019187	5.31354	0.0309881	0.860675	1
CG10646	8.39862	12.9095	10.6285	11.45	8.91408	11.3653	13.7206	7.93009	7.62244	10.6067	0.0244274	3.50013	0.0242414	0.907382	1
CG10650	1.99967	3.18061	3.0367	2.98695	16.9368	5.68265	3.84177	2.44003	4.63974	2.93377	0.521595	2.11403	1.63228	0.20478	0.886663
CG10651	0	0	0	0.248912	0.297136	0	0.182941	0	0	0	0.932125	-0.80652	0.594223	0.476197	1
CG10654	27.9954	29.1868	24.6732	26.3847	23.7709	22.0749	35.8565	22.5703	29.8269	26.4039	-0.0520871	4.77213	0.176563	0.675378	1
CG10657	34.7943	43.9672	27.7099	32.8564	25.8508	36.5001	42.0765	53.6806	38.1122	47.166	-0.383679	5.56239	6.12499	0.0152641	0.418917
CG10659	0	0	0	0	5.05131	0	0	0	0	0	5.3463	-1.049	10.197	0.00354176	0.205705
CG10660	14.7976	18.7095	12.5264	17.4239	13.9654	17.0479	19.9406	16.4702	18.2276	16.4743	-0.172345	4.17812	1.80848	0.200429	0.886663
CG10663	6.79888	4.86446	6.07341	4.97824	7.13126	5.24552	3.65883	7.32008	6.62821	3.6108	0.187225	2.47793	0.514064	0.475301	1
CG10669	24.7959	18.7095	25.0528	19.4152	20.2052	20.1078	20.4894	18.6052	22.2045	23.2445	0.0337519	4.45886	0.0843224	0.996006	1
CG10671	33.5945	32.3674	30.7466	22.8999	29.7136	33.4402	28.9047	31.1104	25.85	33.1742	-0.037141	4.96172	0.137985	0.711194	1
CG10672	40.7933	42.4705	42.1343	35.3455	31.4964	50.9253	47.0159	37.5154	40.7635	46.7147	-0.219452	5.34835	3.61526	0.060555	0.711309
CG10674	13.5978	11.5999	13.2856	10.7032	11.5883	15.2994	13.3547	12.5051	10.2737	14.6689	-0.142402	3.7177	0.968462	0.327788	0.956877
CG10680	148.376	164.269	227.373	174.487	143.22	321.288	191.174	137.862	225.028	203.784	-0.333569	6.96691	0.816235	0.368773	0.99551
CG10681	11.998	6.9225	9.86929	7.46737	8.02267	6.33834	8.23236	6.10007	5.63397	6.09322	0.403207	3.07187	3.70471	0.0575203	0.695909
CG10688	12.7979	13.845	17.0815	14.9347	10.994	23.6048	18.843	10.0651	16.5705	16.2486	-0.30809	3.81924	4.07066	0.0467097	0.656952
CG10694	0	0	0	0	0	0	0.365883	0	0	0	-2.22056	-1.1271	2.50922	0.117879	0.81276
CG10700	0	0.187095	0	0	0	0	0	0	0	0	1.64732	-1.19658	2.15798	0.214216	0.886663
CG10702	43.9928	33.4899	41.7547	42.564	35.6563	25.7905	33.1124	34.4654	31.8154	33.6255	0.309369	5.29193	8.90306	0.00369261	0.210462
CG10710	8.39862	6.9225	7.59176	4.48042	4.75418	5.46408	6.40295	6.10007	4.63974	6.99592	0.088277	2.62807	0.159408	0.753222	1
CG10713	28.7953	27.3158	24.2936	26.1358	21.9881	21.8563	25.7947	21.0452	20.216	25.2756	0.163847	4.74892	2.09253	0.151607	0.88422
CG10721	10.3983	14.5934	19.7386	17.4239	15.4511	15.518	17.9283	13.7252	19.8846	16.2486	-0.0982464	4.28273	0.540185	0.464329	1
CG10725	0	0	0	0	2.67422	0	0	0	0	0	4.44727	-1.13901	9.15252	0.0041733	0.219724
CG10730	0.399934	0.187095	0	0.248912	0	0.437127	0.365883	0.305003	0.662821	0.451349	-1.26244	-0.481186	2.12907	0.148122	0.879348
CG10731	6.79888	6.36122	6.83258	6.47172	8.61694	8.08685	6.03706	6.40507	4.97115	6.99592	0.0927129	3.37365	0.285089	0.68066	1
CG10732	107.182	108.328	107.044	79.9008	94.4892	78.0271	106.838	96.9911	91.1378	103.359	0.058793	6.58014	0.296104	0.587724	1
CG10734	0	0.187095	0	0	0	0	0.182941	0	0	0	0.133978	-1.01926	0.0103708	0.919143	1
CG10737	323.147	280.829	297.597	270.568	335.169	287.192	282.827	320.864	300.258	281.416	0.0333592	8.2595	0.168037	0.682868	1
CG10738	8.79855	8.98054	10.2489	10.2054	10.1026	8.30541	5.67118	7.62509	9.94231	5.19052	0.417588	3.31074	4.96353	0.0284616	0.560012
CG1074	13.5978	21.3288	18.2202	15.6815	17.2339	20.1078	19.2088	17.6902	16.5705	20.7621	-0.125273	4.17683	0.994353	0.323325	0.95283
CG10747	30.7949	29.748	27.3303	30.8651	29.7136	38.03	29.8194	28.9753	27.1756	31.5945	-0.0709972	4.95873	0.472725	0.493562	1
CG10748	0	0	0	0	0	0	0	0	0	0	0	-1.29811	0	1	1
CG10749	0	0	0	0	0	0	0	0	0	0	0	-1.29809	0	1	1
CG10750	0	0	0	0	0	0	0	0	0	0	0	-1.24678	0	1	1
CG10752	0	0.374189	0	0.248912	0	0.218563	0	0	0	0.225675	0.609785	-0.90431	0.299169	0.586461	1
CG10754	14.7976	14.7805	14.0448	11.6989	10.1026	16.1737	13.1718	14.3352	13.5878	13.3148	-0.11173	3.9491	0.774769	0.397314	1
CG10761	0	0	0	0	0	0.218563	0	0	0	0	-1.53259	-1.2705	1.8164	0.265234	0.886663
CG10764	0	0.187095	0.379588	0.248912	0.594272	0.65569	0.365883	0	0.33141	0.451349	-0.39289	-0.560838	0.161379	0.688873	1
CG1077	0.799868	0	0	0	0.297136	0	0.548824	0.305003	0.662821	0.225675	-0.850075	-0.519662	0.674544	0.413712	1
CG10777	169.572	177.179	199.663	207.344	212.749	159.333	170.501	175.377	190.23	166.548	0.166197	7.35355	2.35244	0.128709	0.839183
CG10778	10.3983	15.3418	14.8039	15.9304	15.1539	18.3593	16.8306	13.7252	17.5647	19.1823	-0.248471	4.35681	4.22415	0.0428451	0.630872
CG10793	0	0	0	0	0	0.218563	0.365883	0.305003	0	0	-3.08294	-0.814787	4.24777	0.0427608	0.630578
CG10795	13.9977	12.7224	15.1835	11.6989	11.5883	13.9881	14.4524	10.0651	13.9192	16.2486	-0.0930922	3.86211	0.435491	0.511047	1
CG10799	59.9901	53.6961	58.077	45.302	31.4964	132.012	53.053	32.3304	71.2532	63.6403	-0.512748	5.33231	1.60124	0.209099	0.886663
CG10801	0	0	0	0	0	0	0	0	0	0	0	-1.17312	0	1	1
CG10802	29.9951	24.6965	27.7099	29.3716	22.5823	31.4731	32.3806	34.4654	29.4955	32.4972	-0.260214	4.93304	7.19779	0.00873239	0.327504
CG10803	34.3943	36.8576	45.9302	55.5074	43.0847	45.2426	37.503	44.8355	51.0372	41.9755	-0.0248018	5.38595	0.0462614	0.974617	1
CG10804	83.9862	95.2311	100.97	107.281	112.912	96.8236	94.2148	112.546	104.394	97.2658	-0.0108393	6.64613	0.0137148	0.907042	1
CG10809	20.7966	17.774	17.461	15.9304	14.8568	19.4521	14.2694	16.4702	13.9192	18.054	0.0695126	4.15883	0.301238	0.612109	1
CG10814	2.79954	2.24513	7.59176	4.97824	1.48568	5.90121	3.65883	2.74503	7.62244	1.35405	-0.163267	0.238209	0.0495094	0.824492	1
CG10822	0	0	0	0	0	0	0	0	0	0	0	-1.29814	0	1	1
CG10824	16.7972	19.6449	16.3223	14.4369	15.4511	26.009	15.3671	20.4352	19.5532	19.8594	-0.284862	3.95397	1.93488	0.167766	0.886663
CG10827	0.399934	0.187095	0.379588	0.248912	0.297136	0.218563	0.365883	0.305003	0	0.677024	-0.197975	-0.389113	0.0494359	0.82462	1
CG10830	259.157	241.726	263.055	307.904	270.988	244.354	257.033	254.678	229.336	227.48	0.146663	7.93137	2.48003	0.118923	0.81492
CG10834	0	0	0	0.248912	0	0.218563	0	0	0	0	0.147205	-1.25523	0.013103	0.915156	1
CG10839	0	0	0	0	0	0	0	0	0.33141	0	-1.56887	-1.29797	1.51648	0.265234	0.886663
CG10841	0	0	0	0.248912	0	0	0	0	0.33141	0	0.11228	-1.03977	0.00850683	0.926735	1
CG10845	0	0	0	0	0	0	0	0	0	0	0	-1.29087	0	1	1
CG10853	0	0	0	0	0	0	0	0	0	0	0	-1.27038	0	1	1
CG10859	0	0	0	0	0	0	0	0	0	0	0	-1.16224	0	1	1
CG10862	0	0	0	0	0.297136	0	0	0	0.33141	0.225675	-0.59498	-1.22587	0.207761	0.651044	1
CG10863	232.362	221.333	197.765	197.138	157.185	237.797	200.87	169.277	197.852	204.01	-0.00689598	7.43044	0.00481926	0.944814	1
CG10864	3.59941	2.05804	1.89794	2.98695	1.78282	4.37127	2.74412	3.05003	2.65128	2.25675	-0.310914	1.66144	1.33629	0.250848	0.886663
CG10866	15.9974	17.0256	17.461	21.1575	18.7196	24.4791	17.5624	14.6402	12.5936	20.3107	0.00204031	4.27847	0.000213774	0.988368	1
CG10869	0	1.68385	1.89794	1.74239	0.891408	0.437127	0.731765	0.610007	0.994231	0.677024	0.910209	0.639035	3.04994	0.0842626	0.759817
CG10874	27.5955	31.4319	28.8487	26.1358	24.068	31.9103	29.0877	29.5853	31.8154	31.1431	-0.149568	4.74364	2.15307	0.145884	0.876823
CG10877	3.99934	3.18061	3.0367	2.98695	2.37709	3.27845	3.65883	4.88006	2.31987	3.6108	-0.200373	1.88279	0.514923	0.474934	1
CG10880	4.39928	5.98703	6.07341	5.22716	5.64558	7.86828	3.84177	5.49006	6.2968	4.28782	-0.00207809	2.7144	8.02658e-05	0.992872	1
CG10881	0	0	0	0	0	0.218563	0	0	0	0	-1.53262	-1.24817	1.58562	0.265234	0.886663
CG10887	0.399934	0	0	0	0	0	0	0	0	0	1.7209	-1.22075	2.13925	0.214216	0.886663
CG10889	4.39928	4.86446	3.41629	3.48477	5.05131	2.62276	2.56118	4.27005	3.3141	6.99592	0.117741	2.30129	0.230705	0.632205	1
CG10898	22.7962	20.2062	15.5631	17.4239	17.2339	19.2336	16.2818	17.6902	17.5647	25.5012	-0.0490879	4.3067	0.189883	0.664802	1
CG10899	0	0	0	0	0	0.218563	0	0	0	0	-1.53267	-1.19973	1.49536	0.265234	0.886663
CG1090	267.156	253.326	278.238	343.997	326.85	236.486	261.789	316.899	299.595	255.238	0.102523	8.09805	1.03833	0.311029	0.941762
CG10903	8.39862	9.16763	6.83258	8.46302	9.50835	13.1138	8.96413	7.62509	7.62244	7.67294	-0.0887245	3.18555	0.268279	0.605801	1
CG10904	9.59842	9.54182	7.59176	10.9521	8.91408	10.9282	13.1718	7.32008	9.94231	10.6067	-0.163832	3.38632	1.05129	0.308048	0.938303
CG10907	6.79888	8.23216	10.2489	6.47172	7.13126	8.08685	7.68354	4.27005	13.2564	8.80131	-0.109368	3.32963	0.30011	0.585214	1
CG10909	0	0	0	0	0	0	0	0	0	0.225675	-1.5358	-1.27631	1.65154	0.265234	0.886663
CG1091	44.7926	48.4575	43.273	45.5509	41.0048	44.3684	43.54	44.8355	44.7404	46.0376	-9.12513e-06	5.39716	8.81548e-09	0.999925	1
CG10910	0	0	0	0	31.7936	0.437127	0	0	0	0	5.7243	-0.303139	18.946	5.87125e-05	0.0118323
CG10911	0	0	0	0	113.506	3.27845	0	0	1.32564	0	4.58972	1.63504	18.7468	5.43552e-05	0.0113664
CG10912	0	0	0.379588	0	38.3305	1.52994	0	0	0.994231	0	3.91474	0.0356266	16.7541	0.000110858	0.0195193
CG10914	9.19848	6.7354	3.79588	5.22716	6.83413	8.9611	7.13471	7.93009	8.61667	8.34996	-0.367188	3.03025	4.46422	0.0374709	0.607929
CG10915	102.783	81.9474	83.5094	80.8965	78.4439	74.3116	80.8601	86.621	83.5154	81.4686	0.0699367	6.46061	0.76152	0.38525	1
CG10916	15.5974	18.3353	16.3223	18.1706	20.5024	21.8563	17.1965	18.3002	19.8846	19.6337	-0.115514	4.06629	0.842825	0.361123	0.989961
CG10918	0.399934	0.374189	0	0	0.891408	0.218563	1.09765	1.52502	0	0	-0.726727	-0.246781	0.847084	0.359918	0.988889
CG10919	0	0.187095	0.379588	0	0	0.218563	0	0.305003	0	1.12837	-1.40588	-0.87661	1.86061	0.176235	0.886663
CG1092	12.398	12.3482	10.6285	7.71628	7.72554	23.8234	18.843	16.1652	21.8731	21.8904	-1.01694	4.15709	27.6023	1.0437e-06	0.000529028
CG10920	0	0	0	0	0	0	0	0	0	0	0	-1.27055	0	1	1
CG10924	47.9921	22.8255	41.3751	28.1271	29.1193	43.9312	43.1742	21.6552	34.7981	40.8471	-0.153836	4.60565	0.411966	0.522657	1
CG10927	1.1998	2.24513	1.89794	1.74239	2.97136	3.05989	3.29294	1.22001	0.994231	2.48242	-0.171414	1.4439	0.203339	0.653158	1
CG10931	0	0.187095	0	0	0	0	0	0	0	0	1.64715	-1.22248	2.09079	0.214216	0.886663
CG10932	18.7969	24.8836	17.0815	20.4108	18.7196	38.03	23.4165	22.8753	23.8615	21.6648	-0.367785	4.52872	4.63545	0.0340799	0.58708
CG10933	3.19947	4.11608	1.89794	2.24021	3.2685	2.84132	3.29294	3.66004	2.31987	3.6108	-0.0729619	1.86578	0.0690924	0.862594	1
CG10934	0.799868	0.374189	0	0.746737	0.297136	0.218563	0	0	0	0	2.68953	-0.992387	6.82502	0.0108497	0.363725
CG10936	7.19881	7.48378	8.35094	4.72933	5.64558	5.24552	3.84177	4.57505	6.62821	6.77024	0.306283	3.6398	1.18818	0.278701	0.902889
CG10943	0	0	0.379588	0	1.48568	0.874254	0	0	0	0.225675	0.526174	-0.918926	0.295129	0.58875	1
CG10947	41.5931	45.6511	56.9382	50.5292	57.6444	41.527	38.9665	49.4106	47.7231	39.7187	0.220115	5.89156	2.74575	0.101108	0.798358
CG10948	93.5846	85.5022	90.342	92.8443	70.4212	76.9343	91.6536	84.486	86.8295	95.6861	-0.0112637	6.39119	0.0155294	0.901114	1
CG10949	9.59842	11.5999	12.5264	10.4543	7.72554	10.7096	14.8182	10.0651	8.61667	9.70401	-0.0696057	3.62542	0.131577	0.71768	1
CG10950	0	0	0	0	0.297136	0.218563	0.182941	0	0	0	-0.541259	-1.07618	0.185388	0.668161	1
CG10953	0	0	0	0	0	0	0.365883	0	0	0	-2.22054	-1.12979	2.1066	0.153283	0.886663
CG10958	11.1982	9.91601	8.73052	6.96954	8.02267	10.0539	9.87883	10.3701	12.5936	9.70401	-0.228441	3.46654	1.70648	0.194879	0.886663
CG10959	2.3996	5.23865	4.17547	3.48477	4.1599	5.02696	3.29294	2.74503	5.96539	3.38512	-0.0215018	2.2222	0.00603519	0.938256	1
CG10960	223.963	189.901	195.108	200.125	219.583	264.025	191.905	226.923	199.509	219.356	-0.0999467	7.48649	0.959921	0.329918	0.958172
CG10962	5.59908	2.80642	4.17547	2.24021	1.48568	7.64972	3.29294	3.35504	2.98269	4.28782	-0.472712	1.60197	1.11142	0.294686	0.921347
CG10969	0	0	0	0	0	0	0	0	0	0	0	-1.27012	0	1	1
CG10970	0	0	0.759176	0	0.594272	0.218563	0.182941	0.610007	0.994231	0.451349	-0.87818	-0.434121	1.12134	0.292556	0.919785
CG10973	13.9977	13.845	15.5631	17.4239	14.2625	20.7635	16.6477	17.6902	15.9077	16.9256	-0.229372	4.05957	2.76612	0.0998705	0.796631
CG10979	48.392	42.8447	47.4485	51.7737	42.4904	43.7127	48.4795	52.1556	52.0314	53.4849	-0.100985	5.66595	1.6183	0.206711	0.886663
CG10984	66.789	58.9348	57.3178	56.2542	40.1134	41.3085	64.3954	52.4606	59.6539	63.1889	-0.011286	5.93901	0.00983975	0.921211	1
CG10993	0	0	0	0	0	0	0.182941	0	0	0	-1.51386	-1.14461	1.62427	0.265234	0.886663
CG10996	0	0.187095	0	0	0	0	0	0.305003	0	0	0.0852712	-1.18168	0.00713754	0.932977	1
CG11000	189.569	179.985	184.859	223.523	204.727	149.497	195.93	191.237	212.434	180.088	0.0820525	7.70337	0.781273	0.379183	1
CG11007	14.3976	18.3353	13.2856	16.1793	20.7995	19.2336	11.1594	17.6902	10.6051	17.1513	0.140123	4.07638	0.864822	0.354961	0.980993
CG11018	0	0	0	0	0	0	0	0	0	0	0	-1.30545	0	1	1
CG11023	0	0	0.379588	0	0	0	0.182941	0	0	0.451349	-1.00553	-0.982514	0.653857	0.421772	1
CG11029	0.399934	1.12257	1.89794	0.746737	7.4284	0.218563	0.548824	0.91501	1.32564	0.225675	1.90264	0.193556	9.8251	0.00234593	0.160165
CG1103	9.59842	11.5999	11.7672	12.4456	10.6969	17.0479	11.1594	13.4202	12.5936	14.6689	-0.289181	3.66931	2.29334	0.133547	0.850989
CG11030	32.7946	39.1028	46.6893	53.765	46.3532	42.1827	43.3571	40.2605	52.0314	42.6525	-0.00576908	5.29467	0.00228065	0.96202	1
CG11034	5.19914	4.86446	6.83258	4.97824	7.4284	3.27845	6.76883	3.05003	5.63397	5.64187	0.235356	2.48689	0.418811	0.519231	1
CG11035	11.998	11.787	12.5264	16.1793	14.5597	15.2994	13.3547	9.45511	15.9077	10.381	0.0614458	3.93979	0.137552	0.711626	1
CG11037	0	0	0	0	0	0	0	0	0	0	0	-1.29789	0	1	1
CG1104	44.7926	41.535	51.2444	41.0705	38.9248	39.56	43.3571	43.0055	51.7	52.1309	-0.0813349	5.56914	0.486849	0.487193	1
CG11041	0.399934	0.935473	0.379588	2.48912	2.07995	1.74851	0.182941	0.305003	0.33141	0.902699	0.85389	0.775977	2.31282	0.13193	0.846811
CG11043	0.799868	0.374189	0.379588	0	1.78282	0.437127	0	1.22001	0	0.677024	0.492938	-0.236393	0.456133	0.501224	1
CG11044	29.1952	22.4513	27.3303	21.1575	29.4165	16.3923	20.4894	22.8753	18.8904	27.758	0.272588	4.44404	2.46106	0.120323	0.817472
CG1105	40.3933	45.2769	46.3097	54.0139	50.5131	58.575	44.8206	54.9006	52.3628	50.3255	-0.136972	5.52951	1.96311	0.164731	0.886663
CG11050	205.166	190.088	211.81	182.702	180.659	179.003	180.38	187.882	173.659	178.509	0.108492	7.80562	1.42345	0.236074	0.886663
CG11052	33.5945	24.8836	28.8487	32.3586	23.7709	29.9432	23.9653	30.5003	26.8442	23.2445	0.0906661	3.9357	0.298931	0.58595	1
CG11060	0	0	0	0	0.297136	0.218563	0	0	0	0.225675	-0.562032	-0.778603	0.185026	0.668151	1
CG11068	0	0	0	0	0	0.218563	0	0.305003	0	0.225675	-2.75924	-0.660841	3.87037	0.0536455	0.678766
CG11069	10.7982	8.79344	4.93464	5.47607	9.21122	8.08685	8.04942	8.5401	7.62244	7.67294	-0.0300503	3.21854	0.0307773	0.864281	1
CG11070	45.5925	50.8897	49.726	45.302	42.1933	47.6468	47.0159	53.0706	45.7346	42.8782	-0.0136933	5.78004	0.0352344	0.985714	1
CG11073	199.167	184.662	156.77	135.906	130.74	138.132	174.526	161.652	166.699	180.088	-0.0255104	7.57056	0.0685266	0.794112	1
CG11076	58.7903	62.8638	63.3912	65.4639	51.9988	59.6678	62.7489	53.0706	68.2705	62.7376	-0.0175902	6.03904	0.0439093	0.86375	1
CG11077	27.9954	32.5545	26.9508	31.6119	27.0394	39.56	31.1	31.7204	30.1583	39.7187	-0.233413	5.00976	3.00619	0.0864825	0.765798
CG11085	2.79954	4.11608	2.27753	5.47607	3.56563	3.05989	4.75647	3.35504	3.3141	5.41619	-0.0998934	2.20716	0.15919	0.721034	1
CG11089	115.981	79.7023	67.9463	106.037	103.7	102.725	54.5165	52.7656	87.1609	69.2821	0.368757	6.63662	0.856314	0.357327	0.984685
CG1109	28.7953	30.3093	26.5712	27.3803	23.1766	23.6048	29.6365	29.5853	25.85	30.6918	-0.0312042	4.91145	0.0770782	0.799797	1
CG11095	12.7979	13.0966	13.2856	11.9478	14.8568	18.7965	10.4277	12.5051	10.9365	13.7662	-0.0164478	3.71223	0.0110747	0.91643	1
CG11099	170.772	143.689	132.856	166.024	155.402	142.503	165.928	172.327	141.844	142.401	0.00670518	7.37259	0.00830093	0.970768	1
CG11103	7.59875	11.787	10.2489	12.1967	8.61694	14.6437	11.1594	12.8101	10.9365	9.92969	-0.216405	3.49898	1.96348	0.187101	0.886663
CG11106	0	0	0	0	0	0	0	0	0	0	0	-1.30545	0	1	1
CG11107	61.5899	53.1349	51.2444	47.5422	53.7816	59.4492	49.76	56.4256	62.6365	60.2551	-0.111138	5.84323	2.28488	0.134257	0.852657
CG11109	13.1978	11.4128	14.4243	11.45	13.6683	13.9881	15.0012	10.0651	14.9135	13.5405	-0.0901266	3.68931	0.405131	0.526119	1
CG11110	8.39862	6.9225	7.21217	8.2141	9.21122	9.17966	7.86648	8.8451	7.95385	8.80131	-0.0998211	3.31522	0.371471	0.543789	1
CG11112	0	0	0	0	0	0	0	0	0	0	0	-1.27047	0	1	1
CG11113	0	0	0	0	0	0	0	0	0	0	0	-1.29816	0	1	1
CG11122	83.5862	120.115	89.2032	96.0801	100.135	77.59	123.851	110.716	111.685	109.904	-0.120542	6.83584	0.708757	0.40216	1
CG11123	13.5978	14.5934	14.0448	13.1923	10.3998	16.3923	15.733	11.8951	15.9077	19.6337	-0.277235	3.96146	3.7973	0.0545516	0.682505
CG11125	4.39928	7.10959	10.6285	6.47172	7.13126	4.80839	7.31765	8.8451	3.97692	9.25266	0.0513597	2.80898	0.0463909	0.836614	1
CG11127	17.5971	20.2062	15.5631	14.9347	16.0453	15.0809	17.0135	17.9952	18.2276	19.1823	-0.0431089	4.27053	0.115913	0.884331	1
CG1113	3.99934	4.49027	4.17547	4.23151	2.67422	4.1527	4.57353	3.05003	4.30833	6.31889	-0.199391	2.36141	0.617471	0.434119	1
CG11131	0.399934	0	0	0	0	0	0	0	0	0	1.71997	-1.05894	1.54214	0.218159	0.886663
CG11134	7.19881	6.17412	15.5631	8.2141	7.13126	13.7695	11.1594	5.79507	10.2737	8.57564	-0.211985	3.26588	0.778419	0.380052	1
CG11137	63.1896	58.9348	53.9015	55.2585	57.0501	81.7427	64.7612	57.0357	61.6423	61.3835	-0.182824	5.98195	2.49845	0.11758	0.81276
CG11138	80.3868	101.779	114.636	114.997	109.049	97.2607	100.801	104.616	120.302	110.129	-0.0302533	6.67524	0.108291	0.742888	1
CG11141	27.9954	27.5029	20.1182	26.1358	21.6909	34.533	27.8071	26.8403	21.2103	29.5634	-0.183393	4.77348	2.74699	0.101032	0.798358
CG11145	0	0	0	0	0	0	0	0	0	0	0	-1.27208	0	1	1
CG11147	100.783	107.579	121.468	113.006	106.672	113.216	90.7389	114.986	103.069	125.024	0.00692296	6.67314	0.00392376	0.950197	1
CG11148	351.542	331.719	374.274	355.944	343.192	277.575	337.161	308.054	335.387	310.98	0.162605	8.44178	8.28	0.00503971	0.245056
CG11149	0	0	0	0	2.67422	0	0	0	0	0	4.44697	-1.0655	9.4591	0.00404946	0.218501
CG11151	81.5866	75.9604	87.3052	74.9226	75.7697	103.38	75.3718	66.4908	78.5442	75.601	-0.0182658	6.06074	0.0348435	0.852358	1
CG11155	655.092	589.535	720.838	873.931	854.563	740.93	625.659	792.399	657.187	594.653	0.115241	9.20832	0.519603	0.47294	1
CG11158	6.39895	15.903	12.5264	12.9434	14.5597	15.2994	14.6353	12.2001	14.9135	12.4121	-0.130866	3.34803	0.543325	0.496995	1
CG11159	0	0.374189	0	0.248912	0.594272	0.437127	0.182941	0.610007	0.33141	0	-0.107068	-0.525429	0.011895	0.913402	1
CG1116	30.395	30.1222	29.9875	29.1227	32.9821	32.5659	30.7341	33.8554	23.1987	32.7228	-0.00920077	4.94012	0.0078136	0.929766	1
CG11160	11.5981	6.7354	10.6285	8.2141	13.074	8.52397	7.86648	7.32008	8.61667	6.77024	0.335916	3.23964	1.7309	0.191745	0.886663
CG11162	0	0	0	0	0	0	0	0	0	0	0	-1.23464	0	1	1
CG11164	1.99967	1.12257	1.51835	0.497824	0.594272	0.874254	0.182941	0.610007	0.994231	1.35405	0.464588	0.679388	0.401896	0.527772	1
CG11165	0	0	0	0	0	0	0	0	0	0	0	-1.29804	0	1	1
CG11168	25.9957	28.9997	29.2283	22.8999	25.2566	26.6647	32.0147	26.5353	29.8269	28.8864	-0.122744	4.80266	1.67972	0.198383	0.886663
CG11170	4.79921	3.92899	5.69382	6.72063	5.94272	5.46408	4.93942	4.57505	3.97692	6.54457	0.0663649	2.29598	0.085989	0.873041	1
CG11178	16.7972	29.3738	20.1182	27.3803	25.2566	22.7306	21.5871	17.9952	25.5186	21.6648	0.139782	4.46084	1.27472	0.26198	0.886663
CG11180	8.39862	13.0966	9.86929	7.46737	7.72554	9.39823	9.87883	9.1501	9.27949	8.34996	0.0323618	3.25645	0.0232397	0.879188	1
CG11190	30.395	34.2383	29.9875	28.376	30.9021	29.7246	37.6859	37.2104	35.4609	40.3958	-0.226476	5.15463	7.49029	0.00773731	0.307844
CG11191	31.1949	32.3674	28.8487	28.1271	21.3938	26.8833	32.9294	22.5703	30.8212	31.1431	-0.027047	5.03348	0.0315241	0.859488	1
CG11192	0	0	0	0	0	0	0	0	0	0	0	-1.26967	0	1	1
CG11200	19.5968	20.3933	28.0895	22.8999	31.1993	28.1947	26.3436	24.4003	24.193	29.112	-0.122647	4.73509	0.92822	0.337991	0.963169
CG11208	25.5958	31.2448	26.1916	23.1488	24.3652	34.7516	30.3683	27.7553	31.484	33.3999	-0.269572	4.95774	5.08125	0.0266929	0.545833
CG11210	57.9904	59.8703	55.7994	71.6867	61.8043	72.7816	56.7118	70.7608	56.6712	55.516	-0.0211243	6.08668	0.0433202	0.943582	1
CG11211	129.579	190.836	190.174	153.33	165.208	118.461	294.901	160.737	141.844	106.067	0.0106489	7.53658	0.00177864	0.966457	1
CG11221	24.396	24.5094	24.2936	33.3542	28.2279	25.5719	24.3312	23.1803	30.1583	30.4661	0.0178249	4.6826	0.0223708	0.88145	1
CG11226	0.799868	0.561284	0.379588	0	0.297136	1.09282	0	0	0	0.225675	0.438569	-0.652961	0.240112	0.625356	1
CG11227	0	0	0	0	0	0	0.182941	0	0	0	-1.5134	-1.25466	1.34063	0.265234	0.886663
CG11231	0	0	0	0	0	0	0	0	0	0	0	-1.18828	0	1	1
CG11236	7.19881	15.7159	18.5998	12.1967	10.3998	37.8115	16.2818	9.1501	19.5532	16.0229	-0.623075	3.56198	2.63247	0.10831	0.808604
CG1124	85.186	133.398	112.738	96.8268	149.162	155.836	133.181	147.012	101.08	129.086	-0.204498	7.18308	1.66944	0.199749	0.886663
CG11241	25.5958	33.4899	23.5345	28.8738	24.9594	39.3414	26.7094	23.7903	31.484	29.3377	-0.133076	4.75234	1.21131	0.274102	0.897244
CG11247	81.5866	73.9024	93.3787	87.866	83.7923	69.5032	84.5189	79.9109	88.818	80.1145	0.0608305	6.35644	0.763636	0.384594	1
CG11248	42.793	36.8576	31.5058	35.8434	32.685	28.8504	36.5883	38.4304	37.7808	41.5241	-0.0270101	5.34136	0.0553129	0.814615	1
CG11249	0	0	0	0	0.297136	0.218563	0	0.305003	0.33141	0	-1.09228	-0.852113	0.844666	0.380923	1
CG11251	0	0.187095	0	0	0	0	0	0	0	0	1.64683	-1.27043	2.13011	0.214216	0.886663
CG11257	7.19881	4.11608	4.55506	5.47607	8.31981	8.74254	6.40295	7.93009	5.30256	7.44727	-0.299796	2.90357	1.87361	0.174579	0.886663
CG1126	1.1998	1.87095	1.51835	0.746737	1.48568	1.74851	1.09765	1.22001	1.65705	1.57972	-0.0753004	0.674592	0.0329675	0.907109	1
CG11261	5.19914	5.61284	6.83258	2.98695	5.34845	7.43116	4.39059	3.66004	2.98269	5.19052	0.0940734	2.27929	0.121066	0.799581	1
CG11262	0	0	0	0	0	0	0	0	0	0	0	-1.26261	0	1	1
CG11263	0.799868	0.187095	0.759176	1.49347	0.297136	0.218563	0.731765	0.610007	0.662821	1.12837	0.0311415	0.312357	0.00208932	0.963647	1
CG11266	314.348	295.984	304.05	291.974	301.296	312.327	324.721	312.934	317.491	324.069	-0.0785321	8.19618	1.97298	0.163686	0.886663
CG11267	44.3927	62.3025	53.1423	54.7607	44.5704	67.5361	57.2606	58.8657	40.7635	50.7768	-0.0840016	5.7783	0.526468	0.470039	1
CG11269	0	0	0	0	0.297136	0	0.182941	0	0	0.451349	-1.02378	-1.20639	0.697723	0.408615	1
CG11275	46.7923	45.6511	44.7914	35.8434	52.5931	36.5001	39.8812	38.4304	35.4609	40.6214	0.237128	5.42651	6.22163	0.0145062	0.408669
CG11279	10.7982	13.6579	15.5631	17.4239	11.8854	19.015	14.0865	13.4202	12.2622	12.6378	-0.0425056	3.80888	0.0745405	0.785483	1
CG11284	43.5928	48.4575	42.1343	46.5466	49.0274	45.2426	44.6377	43.3105	43.0833	46.0376	0.0499072	5.44402	0.245061	0.62182	1
CG11286	0	0	0	0	0	0	0	0	0	0	0	-1.27728	0	1	1
CG11289	0	0.187095	0	0	0	0.65569	0	0	0	0	-1.08384	-1.1019	0.73469	0.394825	1
CG1129	28.3953	25.8191	33.0242	26.8825	28.8222	33.4402	28.173	25.0103	34.4667	25.2756	-0.0385969	4.62812	0.155457	0.694337	1
CG11291	0	0	0	0	0	0	0	0	0	0	0	-1.06033	0	1	1
CG11294	6.79888	5.42574	7.97135	4.72933	8.61694	8.52397	7.68354	5.79507	4.63974	6.31889	-0.0216032	2.80185	0.0108089	0.917435	1
CG11298	0	0	0	0	0	0	0	0	0	0	0	-1.30545	0	1	1
CG11300	0	0	0	0	0	0	0	0	0	0	0	-1.19243	0	1	1
CG11306	83.5862	82.3216	80.0931	94.0888	87.9523	102.288	88.3607	90.281	79.8699	87.3361	-0.0665232	6.46993	0.746763	0.389875	1
CG11307	15.5974	16.8385	11.7672	13.4413	14.5597	16.6108	14.8182	12.2001	13.2564	14.6689	0.0133631	3.74506	0.00909756	0.924231	1
CG11309	52.7913	61.7412	56.5586	49.5335	46.0561	94.8565	62.5659	54.9006	71.916	62.5119	-0.37822	5.61505	6.91261	0.0101157	0.355033
CG11313	0.399934	0	0	0.248912	0	0	0	0	0	0	2.44741	2.22878	2.05459	0.156679	0.886663
CG11317	63.9895	65.8573	53.9015	59.7389	46.6503	50.051	57.6265	53.9856	48.7173	61.6092	0.092885	6.09997	0.898538	0.345794	0.971301
CG11318	0.799868	0.935473	1.51835	1.49347	1.18854	0.437127	0.731765	0.91501	0.994231	2.03107	0.213201	0.124643	0.151715	0.697852	1
CG11319	252.758	268.481	302.152	329.311	290.302	243.48	281.364	294.328	265.46	273.518	0.0878867	8.07234	0.683608	0.410605	1
CG11320	0.399934	0.187095	0	0.497824	0.594272	0.874254	0	0.305003	0	0.451349	0.00679064	-0.358179	4.40105e-05	0.994722	1
CG11321	149.175	124.605	143.864	139.64	130.443	82.617	121.473	125.661	118.313	113.289	0.292384	7.46038	6.1411	0.0151349	0.416384
CG11322	0	0.187095	0	0	0.297136	0	0.182941	0.305003	0	0.225675	-0.323355	-0.463695	0.0741087	0.78609	1
CG11327	0	0.187095	0.379588	0	0	0	0	0	0.662821	0	0.114754	-0.96472	0.0119631	0.913168	1
CG11329	0.799868	0.561284	1.51835	0.248912	0	0.218563	0.548824	0.305003	0.33141	0	0.954662	0.0700426	1.30815	0.255861	0.886663
CG11333	0	0	0	0	0	0	0	0	0	0	0	-1.27627	0	1	1
CG11334	17.1972	17.9611	17.461	17.4239	21.0967	21.6378	18.66	17.9952	20.8788	25.9526	-0.206348	4.52922	1.86533	0.175525	0.886663
CG11337	14.7976	13.4708	14.4243	13.1923	11.5883	10.9282	12.44	12.5051	9.94231	12.1864	0.207927	3.69004	2.68766	0.141127	0.864092
CG11340	0	0.187095	0	0	0.594272	0	0.548824	0	0	0	0.237638	-0.902667	0.0379714	0.846	1
CG11342	1.59974	2.05804	4.55506	3.73368	3.56563	3.71558	3.84177	2.44003	2.98269	1.8054	0.04293	1.46224	0.0170022	0.985314	1
CG11345	0	0	0	0	0	0	0	0	0	0	0	-0.937302	0	1	1
CG11349	4.79921	3.18061	1.51835	4.97824	0.891408	1.09282	0.731765	0.610007	0.33141	0.902699	1.99018	0.689378	14.4591	0.000280262	0.0400679
CG11350	0	0	0	0	0.297136	0	0	0.305003	0	0	0.134771	-1.17011	0.0102034	0.919969	1
CG11353	11.1982	10.6644	11.7672	12.9434	14.8568	10.491	12.9888	18.6052	10.2737	13.5405	-0.0982029	2.87002	0.0966426	0.756639	1
CG11356	0.799868	0.374189	0.379588	0	0.297136	0	0.182941	0.610007	0	0	1.10269	-0.869465	1.17898	0.280558	0.904921
CG11357	66.789	51.2639	56.9382	55.2585	66.2613	61.1977	51.2236	56.4256	58.6596	52.1309	0.0814533	5.7618	1.0287	0.313271	0.942841
CG1136	26.7956	34.7996	40.2363	39.577	39.5191	33.0031	29.2706	34.7704	31.8154	29.5634	0.197894	5.15406	1.75457	0.188766	0.886663
CG11360	145.976	192.52	256.981	274.301	293.867	236.704	166.111	284.873	261.483	217.776	-0.00104061	7.40139	2.61939e-05	0.995928	1
CG11362	0.399934	0.187095	0	0.497824	0	0	0.365883	0	0	0	1.07101	-1.01626	1.05907	0.313679	0.942841
CG11367	13.5978	11.2257	14.0448	16.6771	16.9368	16.6108	13.9035	14.6402	16.2391	12.8635	-0.035543	3.82248	0.060589	0.806146	1
CG11368	209.166	296.732	236.104	285.253	286.439	396.255	316.123	394.98	254.855	299.019	-0.336826	8.26512	4.24768	0.0422838	0.628426
CG11369	0	0	0	0	0	0	0	0	0	0	0	-1.27014	0	1	1
CG1137	0.399934	0	0	0.497824	0.594272	0.218563	0.548824	0.610007	0.33141	0	-0.214472	-0.632264	0.0600908	0.806929	1
CG11370	0	0	4.17547	0	3.56563	0	2.56118	2.44003	3.64551	0	-0.20489	0.294008	0.0407388	0.840513	1
CG11373	0	0	0	0	0	0	0	0	0	0	0	-1.29816	0	1	1
CG11374	5.99901	5.23865	2.27753	4.48042	5.94272	4.58983	3.84177	5.49006	2.98269	3.6108	0.233608	2.38155	0.728104	0.395837	1
CG11377	26.3957	23.9481	26.5712	24.6423	20.2052	31.036	28.173	28.0603	21.2103	26.4039	-0.157489	4.61025	1.79005	0.1844	0.886663
CG11378	27.9954	21.8901	18.2202	21.4065	22.5823	18.7965	26.3436	22.8753	22.8673	20.3107	0.00669585	4.74913	0.00315434	0.95534	1
CG11379	0	0	0	0	0	0	0	0	0	0	0	-1.24184	0	1	1
CG1138	0	0	0	0	0	0	0	0	0	0	0	-1.291	0	1	1
CG11380	1.59974	1.12257	0.379588	0.746737	0.297136	0.218563	0.182941	0.610007	0.33141	0.225675	1.43148	1.05799	6.08241	0.0194492	0.472866
CG11381	0	0	0	0	0	0	0.182941	0.305003	0.662821	0.225675	-3.4363	-0.596603	6.27893	0.0146474	0.409244
CG11382	0	0	0.759176	0	0.891408	0	0.182941	0	0	0	2.15433	-0.811252	2.6427	0.10871	0.808604
CG11384	0.399934	0	0	0	1.48568	0	0.182941	0	0	0	2.39138	-1.16638	4.28496	0.0435157	0.636084
CG11388	110.782	93.5473	94.5174	89.6084	96.5692	101.851	101.532	107.971	93.7891	97.9428	-0.0551383	6.85171	0.523309	0.47137	1
CG1139	0	0.187095	0	0	3.2685	0	0	0.305003	0	0	3.26661	-0.400082	9.37828	0.00291998	0.178946
CG11391	0	0.561284	7.97135	1.24456	23.4737	8.52397	0.365883	19.2152	0	0.451349	0.246198	2.83244	0.0431066	0.836009	1
CG11395	101.183	136.766	137.031	92.5953	81.1181	274.297	111.228	84.181	173.659	137.887	-0.510135	6.37588	1.85897	0.176255	0.886663
CG11396	25.9957	21.1417	24.2936	27.3803	18.4224	27.9761	24.5141	22.2653	24.5244	28.6607	-0.13422	4.71742	1.53453	0.218759	0.886663
CG11398	9.59842	5.42574	7.97135	7.46737	6.53699	5.46408	5.85412	6.71008	7.62244	5.64187	0.22811	2.80146	1.52682	0.256231	0.886663
CG11399	70.7883	73.9024	66.8075	68.9487	84.3866	68.6289	62.7489	83.266	62.6365	69.0565	0.0777448	6.20105	0.757517	0.386497	1
CG11400	47.9921	62.3025	62.632	48.289	65.6671	92.6709	45.5524	35.6854	76.8872	57.9984	-0.104414	5.27972	0.159713	0.690398	1
CG11403	5.19914	2.99351	1.89794	1.9913	2.97136	2.4042	5.3053	3.96505	5.63397	3.6108	-0.490533	1.95935	2.89261	0.0925516	0.781405
CG11404	0	0.187095	0.759176	0	0	0	0.365883	0	0.33141	0	0.226477	-0.826314	0.0393887	0.843143	1
CG11406	1.1998	2.05804	1.89794	2.24021	2.07995	1.52994	2.37824	2.74503	2.31987	2.03107	-0.173569	1.26252	0.263064	0.654795	1
CG11407	31.5948	36.6705	32.6446	27.6293	37.4391	41.527	35.8565	45.4455	32.8096	37.6877	-0.217128	5.66476	2.22338	0.139545	0.86155
CG11409	0.399934	1.87095	0.759176	2.24021	0.594272	1.52994	0.914707	2.44003	0.994231	0.451349	0.0643762	1.38374	0.0231836	0.879332	1
CG11412	56.7906	44.1543	39.0976	32.3586	27.6336	34.533	45.0036	31.7204	45.0718	39.4931	0.0219379	5.46305	0.0304489	0.86188	1
CG11413	3.99934	3.3677	4.55506	4.97824	2.67422	4.80839	2.92706	3.05003	7.95385	3.83647	-0.177105	2.63717	0.303057	0.58338	1
CG11414	47.9921	50.1413	49.726	41.3194	41.8962	47.4283	45.3695	45.7505	37.4494	43.7809	0.0684236	5.71926	0.498854	0.481887	1
CG11417	7.99868	10.4773	6.07341	3.48477	3.86277	3.93414	11.7082	4.88006	7.29103	7.44727	-0.147525	3.03368	0.17508	0.676665	1
CG11418	11.1982	9.72892	10.2489	11.6989	10.1026	13.7695	12.0741	10.3701	10.6051	13.5405	-0.200165	3.63914	2.01771	0.15904	0.886663
CG1142	14.7976	13.2837	14.8039	10.2054	8.61694	8.08685	12.623	10.3701	13.5878	11.9608	0.115862	3.68731	0.33148	0.566272	1
CG11423	0.399934	0.187095	0.379588	0.248912	0.891408	0	0.182941	0.91501	0.33141	0.677024	0.0187983	-0.497649	0.000467359	0.982804	1
CG11425	31.9947	22.6384	33.4037	44.8042	32.0907	31.4731	30.9171	32.9404	19.8846	28.435	0.188658	4.94032	0.54826	0.461019	1
CG11426	2207.64	1904.44	1698.66	1817.81	1701.4	1669.82	1987.29	1948.67	1798.9	1867.91	0.00882678	11.0573	0.00561839	0.940422	1
CG1143	9.19848	7.85797	8.35094	6.72063	8.31981	6.11977	7.86648	9.45511	4.97115	5.64187	0.233621	3.29229	1.21889	0.272616	0.896517
CG11436	10.3983	7.29669	10.2489	11.201	7.4284	8.08685	10.2447	10.6751	8.94808	9.70401	-0.0475259	3.39024	0.111131	0.739661	1
CG11437	1.59974	2.24513	0.759176	0.995649	2.37709	1.52994	1.28059	2.44003	1.98846	1.8054	-0.102882	1.44443	0.0685752	0.898289	1
CG11438	13.5978	11.4128	8.35094	11.6989	8.91408	8.74254	10.6106	8.23509	10.6051	9.25266	0.1858	3.76074	1.00241	0.319498	0.948584
CG11444	38.7936	52.1994	42.1343	35.8434	32.685	50.9253	41.8936	34.1604	40.1006	45.5863	-0.0750112	5.25013	0.314935	0.576107	1
CG11447	11.5981	11.787	9.4897	8.2141	10.1026	11.8024	8.4153	11.8951	8.61667	12.4121	-0.0527902	3.43547	0.098835	0.779529	1
CG11448	253.958	238.546	252.046	235.72	222.555	210.695	274.961	246.443	248.558	264.039	-0.0501149	8.02675	0.491628	0.48507	1
CG11449	2.3996	0.935473	0.759176	1.49347	0.891408	1.52994	1.82941	1.22001	3.3141	2.48242	-0.696991	1.57752	2.81395	0.0970303	0.788593
CG11453	0.799868	0.561284	0.379588	0.746737	0.891408	0.65569	0.548824	0.610007	0.33141	0.902699	0.111349	0.899586	0.055656	0.859906	1
CG11454	17.1972	15.7159	16.3223	13.1923	12.1826	15.0809	17.9283	14.6402	12.2622	16.2486	-0.0473944	3.96558	0.121527	0.728224	1
CG11455	129.979	107.766	135.893	130.679	114.397	144.689	114.887	112.241	117.982	102.456	0.0603514	6.98771	0.376736	0.540954	1
CG11456	17.5971	20.2062	16.7019	16.6771	19.611	22.0749	25.6118	24.7053	19.5532	18.054	-0.273288	4.31193	4.8032	0.0310729	0.573092
CG11458	75.5875	60.9928	70.2238	64.4683	73.3926	31.2546	31.8318	50.3256	28.1699	27.9837	1.02522	7.21074	9.53568	0.00270274	0.170103
CG11459	4.39928	0.561284	4.55506	3.23586	2.07995	129.171	4.57353	1.83002	6.62821	4.06214	-3.43172	2.61929	13.5238	0.000406734	0.0523341
CG1146	71.5882	70.7217	80.4727	49.2846	66.2613	65.1319	67.8712	76.2509	66.2821	67.7024	-0.0240941	5.86716	0.0465273	0.829724	1
CG11470	0	0	0	0.248912	0	0	0.182941	0	0.33141	0	-0.591016	-1.10541	0.23713	0.649853	1
CG11474	40.7933	37.7931	34.5425	33.8521	38.3305	44.1498	40.43	35.6854	40.4321	37.2363	-0.0979839	5.33623	1.07066	0.303657	0.932827
CG11475	0.399934	0.935473	1.13876	1.9913	0.594272	2.18563	0.731765	0.91501	1.32564	2.25675	-0.498527	1.17676	1.29048	0.259072	0.886663
CG11486	232.362	260.061	279.756	295.459	309.021	245.447	240.385	263.828	260.157	237.635	0.143174	7.95774	3.54055	0.0632228	0.724831
CG11498	8.79855	4.49027	4.17547	4.97824	3.86277	3.93414	4.93942	3.96505	1.65705	5.86754	0.3013	2.35922	1.72031	0.278958	0.902889
CG11504	17.997	20.3933	15.9427	14.9347	11.2912	17.2665	19.3918	18.6052	19.5532	24.1472	-0.290798	4.45027	2.65224	0.107013	0.808604
CG11505	179.57	186.533	187.137	205.85	220.178	150.59	172.88	193.067	190.23	173.77	0.154998	7.5563	2.43446	0.122318	0.822352
CG11509	11.1982	9.35473	15.1835	10.4543	13.3711	7.64972	10.7935	9.76011	17.8962	8.80131	0.122641	3.3523	0.376564	0.541046	1
CG11523	11.1982	14.7805	12.5264	13.1923	6.53699	12.021	15.55	13.7252	11.5994	13.5405	-0.181211	3.8403	1.31518	0.254596	0.886663
CG11526	67.9888	70.5347	71.7421	62.477	65.3699	59.4492	70.4324	68.3208	64.9564	64.543	0.044449	6.18239	0.365583	0.546992	1
CG11529	1.1998	1.49676	3.0367	0.746737	0.297136	1.74851	1.46353	1.52502	2.31987	3.38512	-0.664275	1.39749	2.14247	0.146867	0.87788
CG11534	24.7959	18.3353	19.7386	13.6902	19.611	16.8294	19.9406	16.4702	16.9019	19.6337	0.0789773	4.11005	0.390076	0.749683	1
CG11537	343.143	305.338	305.189	336.529	370.826	299.213	315.757	350.449	309.537	296.085	0.0804534	8.3748	1.27352	0.262203	0.886663
CG11539	4.39928	4.49027	4.93464	3.48477	4.75418	5.24552	4.02471	2.13502	2.65128	3.83647	0.25762	2.20742	1.23779	0.346752	0.972358
CG11550	42.793	62.8638	50.8648	49.0357	53.7816	70.3774	62.2001	77.4709	54.6827	54.839	-0.2933	6.09425	3.09438	0.0820719	0.75549
CG11555	9.59842	8.79344	12.5264	9.95649	5.64558	6.99403	9.14707	6.71008	10.6051	9.70401	0.0965919	3.35254	0.226364	0.635423	1
CG11560	15.1975	11.5999	10.2489	9.95649	10.3998	15.2994	15.3671	12.2001	11.5994	13.0891	-0.255251	3.66985	3.04195	0.0846631	0.760741
CG11562	10.3983	11.9741	14.0448	10.7032	8.61694	9.83535	13.9035	7.01508	8.94808	10.381	0.130053	3.45799	0.544333	0.51364	1
CG11563	14.3976	8.41926	15.5631	7.21845	9.50835	10.9282	10.4277	7.32008	9.27949	13.0891	0.0567361	3.37861	0.0733363	0.844547	1
CG11566	0	0	0	0	0	0	0	0	0	0	0	-1.30545	0	1	1
CG11570	0	0	0	0	0.297136	0	0	0	0	0	1.697	-1.23573	2.3192	0.214216	0.886663
CG11576	48.392	43.593	34.1629	47.5422	49.0274	48.0839	44.6377	45.7505	50.043	43.3295	-0.0541509	5.55636	0.4195	0.552371	1
CG11577	32.3947	34.6125	26.1916	28.6249	29.7136	47.2097	38.2347	38.1254	30.8212	36.3336	-0.331614	4.94699	9.78313	0.00239448	0.160853
CG11581	0	0	0	0	0	0	0	0	0	0	0	-1.30545	0	1	1
CG11583	10.3983	10.8515	12.5264	11.6989	10.1026	8.30541	10.6106	11.5901	9.27949	11.0581	0.12723	3.45951	0.440641	0.508565	1
CG11584	0	0	0	0	0	0	0	0	0	0	0	-1.24103	0	1	1
CG11585	0	0	0	0	0	0	0.365883	0	0	0	-2.22793	-0.465457	2.05219	0.155735	0.886663
CG11586	19.5968	18.8966	22.0161	12.6945	9.80549	10.0539	23.7824	12.5051	17.2333	17.8283	0.00488833	4.39157	0.000636269	0.979934	1
CG11588	0	0	0	0	0	0	0	0	0	0	0	-1.30545	0	1	1
CG11590	9.59842	8.60635	10.2489	9.45866	8.31981	10.491	10.6106	8.23509	9.6109	10.381	-0.108976	3.29748	0.373477	0.542706	1
CG11593	45.9924	46.9607	37.1996	41.0705	42.1933	42.1827	44.8206	42.0905	40.4321	44.2322	-0.00159392	5.54131	0.000407219	0.983946	1
CG11594	70.7883	72.2185	60.3545	40.5727	53.4845	113.434	77.2012	48.1906	73.5731	83.274	-0.418466	5.86694	2.66537	0.106161	0.808604
CG11596	22.7962	18.1482	19.359	18.4195	21.3938	21.2006	20.4894	20.1302	21.8731	20.5364	-0.0649628	4.46541	0.265501	0.60767	1
CG11597	4.39928	6.9225	3.0367	6.96954	7.4284	9.61679	5.67118	7.32008	5.63397	6.77024	-0.245077	2.75985	1.30088	0.262127	0.886663
CG11598	0	0	0	0	0	0	0	0	0	0	0	-1.18425	0	1	1
CG11600	0	0	0	0	0	0	0	0	0	0	0	-1.25488	0	1	1
CG11601	27.1955	28.0642	19.359	26.1358	28.5251	33.6588	21.4041	29.2803	27.1756	27.5323	-0.0955593	4.69927	0.566163	0.480408	1
CG11608	0	0	0	0	0	0	0	0	0	0	0	-1.30545	0	1	1
CG1161	85.5859	81.7603	74.7788	62.7259	63.8842	81.5241	80.8601	76.8609	82.8526	81.6942	-0.132761	6.3586	2.4631	0.120171	0.816783
CG11617	10.3983	8.04507	9.11011	5.47607	7.13126	6.5569	8.23236	5.79507	6.2968	4.96484	0.298346	3.28775	2.49055	0.136559	0.855278
CG11619	8.39862	7.67088	5.31423	7.96519	11.2912	8.30541	7.86648	8.5401	5.96539	6.77024	0.117571	3.33613	0.380628	0.538875	1
CG11626	1.1998	0.561284	0.759176	0.497824	0.891408	1.74851	1.28059	0.91501	1.65705	1.57972	-0.939109	1.49975	6.00877	0.032169	0.574612
CG11629	0	0	0	0	0	0	0	0	0	0	0	-1.30545	0	1	1
CG11630	0	0	0.379588	0	0	0	0.182941	0	0	0	0.202961	-1.16048	0.0222245	0.915156	1
CG11634	0	0	0	0	0	0	0	0	0	0	0	-1.29804	0	1	1
CG11635	0.799868	0	0.379588	0.746737	0.594272	0.218563	0.182941	0.305003	0.33141	0.225675	0.881694	-0.540043	0.788592	0.37697	1
CG11638	57.5905	66.7928	61.4933	85.6258	61.5071	57.4822	58.5412	68.6258	66.6135	63.1889	0.0902106	5.76561	0.542273	0.463469	1
CG11652	16.3973	19.0836	15.9427	17.1749	14.5597	19.2336	21.953	27.7553	22.2045	20.3107	-0.407773	4.45438	12.4806	0.000660128	0.0736055
CG11655	23.1962	22.4513	17.8406	19.1662	23.4737	27.9761	20.6724	26.2303	22.2045	18.731	-0.121444	4.53852	0.934219	0.336443	0.962295
CG11656	0	0	0	0	0	0	0	0.305003	0	0	-1.56207	-1.16532	1.12592	0.29327	0.920363
CG11658	86.3858	91.4892	95.6562	89.8573	108.752	83.2726	77.933	93.9411	82.5212	85.7564	0.158446	6.61518	4.3904	0.0390424	0.615856
CG11659	0	0	0	0	0	0	0	0	0	0	0	-1.2632	0	1	1
CG11663	0	0	0	0	0	0	0	0	0	0	0	-1.30545	0	1	1
CG11664	0	0	0	0	0	0	0	0	0	0	0	-1.30545	0	1	1
CG11665	114.781	106.644	114.256	131.177	131.037	133.979	102.813	137.862	100.749	109.678	0.0316149	6.74813	0.0786518	0.779797	1
CG11666	0	0	0	0	0	0	0	0	0	0	0	-1.2982	0	1	1
CG11668	5.99901	5.05155	4.93464	6.72063	5.34845	6.33834	4.57353	5.79507	4.30833	10.8324	-0.194652	3.18321	0.806422	0.371654	0.998891
CG11670	0	0	0	0	0.297136	0	0	0	0	0	1.69707	-1.26917	2.02781	0.214216	0.886663
CG11671	0	0	0	0	0	0	0	0	0	0	0	-0.943543	0	1	1
CG11672	0	0	0	0	43.3819	0	0	0	0	0	8.42836	-0.344313	19.9928	7.76246e-05	0.014427
CG11674	2.3996	2.43223	0.759176	1.24456	2.97136	0.437127	0.182941	0	0.33141	0.677024	2.4799	1.647	10.053	0.00209952	0.151374
CG11679	7.99868	9.35473	7.97135	5.22716	6.53699	8.30541	7.31765	5.49006	4.63974	6.09322	0.199579	2.81822	0.916108	0.341146	0.965214
CG11686	15.5974	17.9611	9.86929	19.4152	22.5823	26.009	14.6353	18.3002	16.2391	19.1823	-0.128918	4.32082	0.429686	0.513869	1
CG11693	0	0.561284	0	0	0.297136	0.218563	0.182941	0	0.994231	0.677024	-0.824768	-0.640104	0.8192	0.368853	0.99551
CG11694	0	0	0	0	0	0	0	0	0	0	0	-1.30545	0	1	1
CG11695	17.997	21.703	13.6652	14.188	12.4797	11.1467	17.9283	13.1152	18.559	18.2797	0.0310445	4.18668	0.0317009	0.859099	1
CG11696	15.1975	14.2192	13.2856	12.4456	9.21122	11.1467	14.6353	13.1152	12.5936	12.6378	0.000243728	3.85042	2.70241e-06	0.998692	1
CG11697	0	0	0	0	0.297136	0	0	0	0	0	1.69708	-1.28335	1.95882	0.214216	0.886663
CG11698	0	0	0	0	0	0	0	0	0	0	0	-1.25524	0	1	1
CG11699	27.1955	27.3158	24.6732	20.1619	24.9594	26.009	28.3559	21.6552	26.5128	25.0499	-0.0427623	4.8116	0.125282	0.72423	1
CG11700	2.3996	2.99351	1.13876	2.48912	1.78282	1.74851	1.46353	1.22001	1.65705	2.48242	0.361443	1.37136	0.837509	0.362635	0.991791
CG11703	0	0	0	0	0	0	0	0	0	0	0	-1.30545	0	1	1
CG11710	21.1965	20.9546	14.4243	17.6728	15.7482	22.9492	23.7824	17.6902	21.2103	22.5675	-0.265826	4.49104	5.27994	0.0239666	0.52744
CG11714	0	0.187095	0.379588	0.248912	0.594272	0.437127	0.182941	0.305003	0.33141	0	0.194136	-0.707026	0.0477475	0.827541	1
CG1172	31.1949	33.3028	32.6446	32.3586	33.2792	29.5061	27.99	27.1453	30.4897	28.2093	0.185602	4.90677	3.06054	0.0837345	0.758113
CG11722	14.7976	12.1611	10.6285	17.4239	16.3425	13.9881	13.1718	10.6751	13.9192	11.0581	0.184837	3.93336	1.50248	0.223592	0.886663
CG11723	15.9974	23.5739	21.6365	16.6771	16.3425	21.6378	18.4771	22.8753	17.8962	16.4743	-0.0363314	4.32976	0.103913	0.976407	1
CG11726	0	0	0	0	0	0	0	0	0	0	0	-1.28351	0	1	1
CG11737	35.1942	39.2899	39.4772	39.0792	48.4332	49.3953	39.8812	36.2954	28.8327	36.108	0.0753697	5.17339	0.43675	0.510438	1
CG11739	99.1837	101.031	114.256	71.9356	80.821	150.153	91.8366	89.061	94.1205	93.2037	-0.154755	6.45832	1.03948	0.310764	0.941693
CG11741	3.99934	3.18061	8.73052	4.97824	1.78282	15.518	1.46353	7.32008	3.97692	5.86754	-0.629734	1.97037	1.33902	0.250368	0.886663
CG11752	70.3884	65.8573	54.6607	59.49	65.0728	67.099	61.6512	64.3557	51.0372	56.87	0.0658503	6.17695	0.228319	0.633969	1
CG11753	23.5961	23.1997	20.1182	17.1749	21.0967	26.8833	23.5994	21.6552	20.8788	22.5675	-0.141973	4.51148	1.00174	0.31966	0.948584
CG11755	8.79855	6.7354	8.35094	7.96519	7.13126	9.83535	5.48824	6.10007	7.62244	4.73917	0.197729	2.65281	0.959713	0.32997	0.958172
CG11756	0	0	0	0.248912	0	0	0	0	0	0	1.67983	-1.24246	2.1657	0.214216	0.886663
CG11760	1.1998	0.374189	1.51835	0.746737	0.297136	0.437127	0.731765	0.610007	0.33141	0.225675	0.650946	0.43335	1.23551	0.323397	0.952872
CG11762	0	0	0	0	0	0	0	0	0	0	0	-1.24226	0	1	1
CG11768	0.399934	0	0	1.24456	0.594272	0	0	0.305003	0	0	2.6819	-0.798798	5.41843	0.0222415	0.507481
CG11771	67.1889	54.8187	55.7994	62.9748	56.753	60.1049	57.2606	64.3557	57.0026	57.9984	0.00232496	5.98614	0.00104069	0.974339	1
CG11777	6.79888	5.98703	6.453	5.47607	4.1599	5.24552	5.12236	6.40507	5.30256	6.31889	0.0185411	2.55969	0.00703107	0.933367	1
CG11779	53.9911	39.2899	38.718	46.0488	47.2446	52.0181	46.2842	45.4455	44.409	45.3606	-0.0575829	5.66048	0.456378	0.50111	1
CG11781	9.99835	10.1031	8.35094	7.46737	8.61694	14.4252	10.0618	7.32008	5.96539	12.1864	-0.190738	3.50468	1.21127	0.27411	0.897244
CG11786	0	0	0.379588	0.497824	0.297136	0	0.182941	0.305003	0	0	1.06302	-1.10953	1.17954	0.313679	0.942841
CG11788	5.19914	4.11608	4.55506	3.73368	3.2685	5.02696	5.12236	6.40507	1.65705	3.83647	-0.112939	2.24569	0.202835	0.653561	1
CG11790	51.5915	49.9543	51.2444	48.0401	49.9188	75.4044	68.9689	51.5456	52.6942	57.547	-0.294483	5.63097	10.2334	0.00192353	0.146917
CG11791	127.579	114.502	141.966	116.242	134.008	120.866	114.521	127.186	100.749	109.001	0.145683	6.82548	2.30871	0.132269	0.848013
CG11796	52.3914	47.3349	52.7627	38.5814	38.3305	50.2696	38.6006	55.2056	44.409	48.7457	-0.0515057	6.19024	0.0422294	0.837662	1
CG11802	21.1965	24.3223	20.4978	23.8956	17.2339	23.6048	24.3312	26.2303	19.8846	28.435	-0.18849	4.67915	2.21773	0.140043	0.862103
CG11807	37.1939	40.9737	41.3751	38.5814	40.1134	46.3354	42.0765	43.6155	37.7808	37.0107	-0.0613257	5.39831	0.435115	0.511229	1
CG11808	7.19881	3.92899	4.93464	2.73803	2.67422	3.27845	3.29294	1.83002	5.30256	6.09322	0.0722981	2.03587	0.0592193	0.898116	1
CG11811	26.3957	27.8771	24.2936	31.6119	26.7422	29.7246	27.6241	30.5003	28.1699	28.435	-0.0707577	4.7097	0.445278	0.550067	1
CG11815	0	0	0	0	0	0	0	0	0	0	0	-1.30545	0	1	1
CG11816	0	0.187095	0	0.497824	0	0.218563	0	0	0	0.225675	0.636031	-0.889266	0.308428	0.580137	1
CG11825	2.79954	1.49676	2.65712	1.9913	2.67422	2.62276	1.09765	1.52502	0.662821	1.8054	0.516188	1.12931	1.64141	0.20353	0.886663
CG11828	0	0.561284	0.759176	0	0.297136	0.437127	1.09765	0.610007	0.33141	1.12837	-1.11785	-0.255339	2.48991	0.1182	0.812959
CG11835	20.7966	14.0321	21.2569	11.45	14.5597	9.83535	18.4771	19.2152	12.925	12.6378	0.140696	4.29585	0.509228	0.477379	1
CG11836	2.3996	4.49027	6.07341	3.73368	3.2685	6.5569	2.56118	6.71008	2.65128	5.86754	-0.277487	2.09792	0.866009	0.354632	0.980972
CG11837	6.39895	4.49027	3.41629	7.71628	4.45704	5.24552	6.40295	3.96505	5.30256	5.86754	-0.0261001	2.53133	0.0147237	0.9037	1
CG11839	3.99934	5.79993	4.55506	4.72933	5.05131	4.37127	4.57353	3.05003	3.64551	5.19052	0.211577	2.27813	0.827832	0.365409	0.993062
CG11841	39.9934	40.0382	33.4037	30.6162	21.6909	60.3235	53.9677	21.3502	46.7289	52.5822	-0.511491	4.62547	4.39259	0.0389948	0.615856
CG11842	33.5945	20.7675	33.0242	26.6336	15.1539	39.3414	36.0394	14.3352	33.4724	35.4309	-0.323746	4.35199	0.613068	0.435757	1
CG11843	0.799868	1.30966	0.379588	0.746737	0.891408	1.52994	1.46353	1.22001	2.31987	2.7081	-1.06478	0.564365	4.29284	0.0412279	0.62201
CG11851	9.59842	13.845	6.83258	13.9391	9.21122	15.7366	15.55	13.1152	15.9077	12.1864	-0.405261	3.68715	4.05374	0.0471581	0.658843
CG11852	1.99967	3.3677	4.93464	3.48477	5.05131	8.30541	2.37824	3.96505	1.98846	7.22159	-0.365896	2.79312	1.64716	0.202747	0.886663
CG11854	0.399934	0.561284	1.51835	0.497824	2.37709	1.74851	0.548824	1.52502	0.662821	1.12837	-0.0984656	0.270091	0.0331663	0.855914	1
CG11857	73.9878	74.4636	87.3052	82.141	76.3639	101.632	79.2136	89.976	81.8583	79.6632	-0.133871	6.43884	3.22631	0.0759281	0.742696
CG11858	6.79888	8.60635	7.97135	6.96954	4.75418	7.21259	8.78118	5.18506	7.29103	7.89861	-0.0559011	3.01654	0.0665081	0.797098	1
CG11864	0	0	0	0	0	0	0	0	0	0	0	-1.30545	0	1	1
CG11865	0	0	0	0	0	0	0	0	0	0	0	-1.27661	0	1	1
CG11873	169.972	186.72	172.713	190.667	188.681	121.958	194.467	175.072	186.584	166.999	0.106407	7.52608	1.02624	0.313848	0.943095
CG11876	305.15	246.216	221.679	222.528	203.538	252.659	234.531	226.313	213.428	233.348	0.0458636	8.14185	0.209924	0.647967	1
CG11878	0	0	0	0	5.94272	0	0	0	0.662821	0	3.26244	-0.355931	11.3265	0.00113794	0.10815
CG11880	74.3877	62.4896	64.53	66.9574	82.9009	72.7816	63.1148	63.1357	65.2878	58.4497	0.119846	6.04937	2.18099	0.143328	0.869846
CG11882	3.99934	4.30318	3.0367	2.48912	2.37709	3.71558	3.11	3.96505	2.65128	2.93377	-0.00596576	2.328	0.000619771	0.980195	1
CG11883	108.382	95.6053	108.562	112.757	112.317	96.605	99.5201	104.006	111.685	101.779	0.0660169	6.83847	0.86896	0.353818	0.980211
CG11885	8.39862	5.61284	4.17547	5.47607	4.45704	5.68265	5.48824	4.88006	6.95962	4.28782	0.0395908	2.50323	0.027691	0.868223	1
CG11889	0	0	0.379588	0	0	0	0	0	0	0	1.71742	-1.29058	1.8276	0.214216	0.886663
CG11891	0	0	0	0	0	0	0	0	0	0	0	-1.30545	0	1	1
CG11892	1.99967	2.43223	3.0367	3.48477	3.86277	2.18563	4.20765	1.52502	1.65705	2.7081	0.224983	1.34934	0.320537	0.57274	1
CG11893	0	0	0.379588	0.248912	0	0.218563	0.182941	0	0	0	0.189981	1.96362	0.0384877	0.880239	1
CG11897	49.1919	49.0188	44.4118	49.5335	48.7303	47.4283	41.1618	42.7005	53.6885	48.2944	0.0504402	5.56421	0.151966	0.697614	1
CG11898	0	0.187095	0	0	0.594272	0	0.182941	0	0.33141	0	0.652076	-0.935074	0.336832	0.563312	1
CG11899	63.1896	67.9153	59.2157	56.2542	52.2959	88.7367	63.8465	46.3605	59.9853	46.2633	-0.0330602	5.8856	0.0178941	0.893894	1
CG11902	29.9951	31.0577	27.7099	29.8695	25.8508	25.7905	28.9047	31.1104	26.5128	34.0769	-0.0171497	4.96367	0.0265128	0.928816	1
CG11905	0	0.561284	0	0.248912	0	0	0	0.610007	0.33141	0	0.416611	-0.457943	0.15501	0.694754	1
CG11906	9.59842	12.7224	13.6652	12.6945	11.2912	12.6767	14.6353	10.3701	13.5878	10.8324	-0.0480848	3.77375	0.0991562	0.753597	1
CG11911	0	0	0	0	0	0	0	0	0	0	0	0.885354	0	1	1
CG11912	0	0	0	0	0.297136	0	0	0	0	0	1.69641	-0.879899	1.43562	0.241196	0.886663
CG11913	0	0	0.379588	0.248912	0.297136	0.437127	0.182941	0.305003	0	0.225675	-0.421131	-0.568715	0.178056	0.674088	1
CG11920	11.1982	7.48378	7.59176	5.72498	3.56563	7.43116	7.31765	5.49006	5.96539	9.02699	-0.0291061	3.05901	0.020642	0.88609	1
CG11927	12.398	16.6514	10.6285	12.6945	12.4797	13.9881	14.6353	10.0651	14.2506	9.70401	0.0645942	3.83168	0.224675	0.636686	1
CG11929	0	0	0	0	0	0	0	0	0	0.225675	-1.53581	-1.26525	1.78302	0.265234	0.886663
CG11951	16.7972	15.1547	17.0815	14.188	9.50835	17.4851	15.3671	15.8602	11.5994	16.2486	-0.0899818	3.97554	0.193689	0.660954	1
CG11961	45.5925	39.2899	33.7833	35.5944	44.8675	55.7337	41.3447	40.8705	42.0891	44.9093	-0.179877	5.13933	3.3053	0.0724916	0.742696
CG11964	23.1962	21.8901	24.6732	14.188	12.1826	16.3923	21.5871	14.9452	17.8962	23.2445	0.011444	4.34834	0.00371383	0.951546	1
CG11966	0	0	0	0	0.297136	0	0	0	0	0	1.69682	-1.14771	1.73951	0.214216	0.886663
CG11970	38.7936	41.7221	39.4772	31.8608	34.4678	31.9103	42.0765	42.0905	35.4609	41.0728	-0.0490311	5.37971	0.246562	0.620756	1
CG11975	37.9937	33.677	29.2283	39.0792	43.0847	39.9971	31.6489	41.1755	34.1353	33.8512	0.0214203	5.09765	0.0373559	0.847192	1
CG11977	0	0.187095	0	0	0.297136	0	0.182941	0	0.33141	0.451349	-0.690609	-1.19954	0.445609	0.520869	1
CG11980	23.5961	26.9416	22.0161	23.1488	17.2339	25.5719	26.5265	15.2502	25.85	22.3418	-0.0328374	4.61669	0.063952	0.800951	1
CG11982	45.9924	48.0833	37.9588	36.3412	35.6563	43.9312	47.9306	36.2954	40.1006	44.6836	-0.0645903	5.52815	0.46552	0.496865	1
CG11983	4.39928	2.99351	4.17547	4.72933	2.67422	2.62276	3.29294	3.66004	3.97692	1.57972	0.330847	2.05235	1.50175	0.223702	0.886663
CG11984	176.371	171.753	168.158	125.95	134.603	124.363	151.292	141.522	158.414	157.747	0.0822519	7.45499	0.487743	0.486795	1
CG11985	13.5978	10.4773	11.3876	9.45866	8.31981	11.3653	14.0865	7.32008	13.5878	12.1864	-0.16034	3.54583	0.992607	0.321864	0.950532
CG11986	7.19881	6.54831	7.21217	6.96954	6.53699	6.99403	7.86648	5.49006	7.29103	5.86754	0.0287093	2.66241	0.0213863	0.961311	1
CG11997	0.399934	0.935473	0.759176	0.497824	1.48568	2.4042	0.182941	0.91501	0.33141	0.902699	-0.202686	0.440799	0.126228	0.723234	1
CG11999	19.1968	13.0966	16.3223	9.70758	14.8568	17.2665	17.1965	12.8101	14.9135	17.1513	-0.149211	4.02638	0.869157	0.353764	0.980211
CG12003	0	0	0	0	0	0	0	0	0	0	0	-1.29152	0	1	1
CG12004	145.176	148.74	145.762	166.273	174.716	180.752	148.914	178.122	152.78	142.626	-0.0398854	7.28193	0.25665	0.61371	1
CG12006	53.5912	49.5801	38.3384	46.2977	47.8389	46.7726	44.6377	44.2255	44.409	44.2322	0.0721252	5.69449	0.820345	0.367576	0.994893
CG12007	26.3957	26.1932	20.1182	19.6641	20.5024	27.539	20.4894	25.6203	23.1987	30.6918	-0.174467	4.60522	2.62899	0.10854	0.808604
CG12009	0	0.187095	0	0	0.297136	0.218563	0	0	0	0.225675	0.159648	-1.05345	0.0211967	0.884656	1
CG12010	5.99901	4.30318	6.07341	6.72063	5.05131	6.33834	6.22001	5.49006	4.97115	6.54457	-0.0972601	2.68208	0.169623	0.681458	1
CG12011	0.799868	0.561284	0	0	0.891408	0.437127	0.548824	4.27005	1.98846	0	-1.52431	0.134776	2.89193	0.0925895	0.781405
CG12012	27.5955	34.6125	30.7466	26.1358	32.3878	37.8115	26.7094	28.6703	29.4955	38.816	-0.0907265	4.7813	0.603479	0.439357	1
CG12014	9.59842	11.5999	8.35094	6.96954	6.23986	12.021	9.69589	7.93009	8.61667	10.6067	-0.191947	3.22013	1.37485	0.244175	0.886663
CG12016	0.399934	0.187095	0	1.24456	0.594272	0.65569	0.365883	0	0	0.451349	0.587488	-0.632519	0.397042	0.530269	1
CG12017	0	0.187095	0.379588	0.497824	0.297136	0	0	0.610007	0.33141	0	0.784336	-0.546845	0.554092	0.458854	1
CG12018	5.19914	6.54831	4.17547	4.72933	2.37709	5.46408	6.22001	3.35504	4.63974	4.51349	-0.0667868	2.45828	0.0643857	0.800291	1
CG12020	0	0	0	0	0	0	0	0	0.33141	0	-1.56887	-1.2834	1.46948	0.265234	0.886663
CG12024	73.5879	70.5347	64.9096	61.9791	68.6384	77.59	76.6524	68.0158	68.2705	69.0565	-0.084798	6.15795	1.3097	0.255582	0.886663
CG12025	199.967	204.681	223.577	243.685	236.52	262.932	195.198	242.478	219.725	206.718	-0.023338	7.52963	0.0650676	0.799259	1
CG12027	0	0	0	0	0.297136	0	0	0	0	0.225675	0.160924	-1.13404	0.012625	0.915156	1
CG12034	23.996	24.6965	14.8039	18.4195	23.7709	21.8563	21.5871	17.3852	23.8615	24.8242	-0.045925	4.59472	0.130333	0.76467	1
CG12035	0	0	0	0	0	0	0	0	0	0	0	-1.29805	0	1	1
CG12038	35.1942	28.8126	30.367	30.3673	27.3365	26.8833	32.7465	31.4154	31.484	39.0417	-0.0936993	5.18618	0.769681	0.382727	1
CG12042	22.3963	23.761	25.812	21.1575	27.9308	24.2605	26.1606	22.2653	26.1814	27.3066	-0.0634848	4.81574	0.40215	0.527642	1
CG12050	17.5971	22.6384	15.5631	18.1706	13.6683	22.512	17.5624	18.3002	18.8904	20.5364	-0.144835	4.27887	1.01069	0.317603	0.947317
CG12054	145.576	157.908	182.582	189.422	158.076	135.946	147.817	164.397	151.786	153.684	0.146516	7.22641	3.69113	0.0579703	0.696601
CG12056	11.5981	20.5804	12.1468	12.6945	13.6683	10.491	14.2694	13.7252	15.5763	17.377	0.0158163	4.09513	0.0157781	0.900329	1
CG12057	0	0	0	0	0	0	0	0	0	0	0	0.826683	0	1	1
CG12061	0	0.187095	0	0	0	0	0	0	0	0	1.64741	-1.18131	1.86448	0.214216	0.886663
CG12065	70.7883	68.1024	59.5953	58.2455	55.2673	54.6408	65.6759	59.7807	58.991	68.1538	0.0204339	5.94661	0.0433812	0.835495	1
CG12069	0	0	0	0	0	0	0	0	0	0	0	-1.27714	0	1	1
CG12071	123.98	104.025	90.342	79.9008	67.4499	67.5361	119.644	81.7409	107.708	110.129	-0.0676001	6.67601	0.232586	0.630821	1
CG12075	37.9937	48.6446	38.718	44.5553	39.8162	44.3684	47.7477	52.1556	50.3744	52.5822	-0.228015	5.55366	4.81933	0.0307991	0.573092
CG12078	0	0	0	0	0	0	0	0	0	0	0	-1.26954	0	1	1
CG1208	12.7979	10.8515	14.4243	11.201	24.3652	13.3324	8.96413	14.9452	9.94231	8.57564	0.39946	4.38812	3.40366	0.0684477	0.742696
CG12081	27.9954	24.8836	22.0161	21.6554	24.3652	29.5061	24.6971	18.3002	22.8673	23.0188	0.0206411	4.6548	0.0403161	0.974714	1
CG12082	29.1952	34.4254	24.2936	23.8956	26.148	26.8833	32.3806	25.6203	31.8154	34.0769	-0.123228	4.90229	0.884184	0.349656	0.976085
CG12084	92.7847	91.3022	90.342	92.5953	94.1921	85.6768	97.1419	88.756	89.4808	76.7294	0.0750408	6.57966	1.04047	0.310534	0.941337
CG12090	168.772	147.431	143.105	128.439	136.98	134.416	155.134	154.942	151.455	157.521	-0.0574096	7.43769	0.538861	0.464875	1
CG12091	214.365	207.301	179.166	161.295	159.859	214.848	179.831	174.462	176.31	182.797	-0.0107521	7.60576	0.0235425	0.878409	1
CG12093	28.7953	26.9416	26.5712	24.1445	22.2852	31.9103	29.8194	26.8403	31.1526	29.112	-0.212985	4.87401	4.5224	0.0362801	0.600329
CG12096	17.5971	22.6384	20.1182	18.4195	21.9881	22.9492	19.3918	18.9102	19.8846	21.4391	-0.0212599	4.37147	0.0303296	0.935596	1
CG12099	189.969	206.365	193.59	165.029	157.779	172.665	189.71	183.612	189.567	191.146	-0.0217747	7.60514	0.0967344	0.756527	1
CG12104	7.59875	17.3998	14.4243	15.9304	11.8854	17.0479	16.6477	11.2851	19.8846	17.8283	-0.27133	3.83348	2.66545	0.106156	0.808604
CG12105	3.59941	2.24513	4.55506	2.24021	5.64558	3.49701	2.01235	3.96505	3.97692	1.12837	0.325594	2.40244	0.992993	0.32177	0.950423
CG12106	11.998	11.5999	8.35094	11.9478	12.7768	9.39823	11.7082	14.0302	10.2737	10.1554	0.0406238	3.63862	0.075229	0.784519	1
CG12107	29.9951	26.7545	25.0528	28.376	23.4737	29.5061	29.8194	28.9753	23.8615	34.9796	-0.144774	4.79313	1.47825	0.22733	0.886663
CG12111	0	0	0.379588	0	0.891408	0	0.365883	0	0	0.451349	0.291481	-0.877672	0.0775868	0.831269	1
CG12112	7.59875	9.91601	7.59176	8.71193	6.83413	12.021	7.31765	9.45511	10.2737	8.80131	-0.212616	2.83742	0.919423	0.340278	0.964964
CG12115	0	0	0	0	0	0.218563	0	0	0.662821	0	-2.79544	-1.07378	3.91997	0.0536455	0.678766
CG12116	108.382	176.991	211.431	115.495	84.3866	179.659	178.002	96.3811	114.999	178.734	-0.106552	7.16738	0.0956612	0.757838	1
CG12118	48.392	46.5865	48.5873	32.3586	48.136	40.8714	36.2224	40.5655	43.7462	34.5282	0.192816	5.38536	3.28124	0.0735198	0.742696
CG12119	37.1939	20.7675	37.5792	17.4239	19.3138	39.1228	24.88	44.5305	37.7808	20.085	-0.350869	5.13091	0.88276	0.350043	0.976675
CG12121	91.9848	83.4442	92.6195	84.3812	80.2267	95.9493	91.1048	82.3509	88.818	81.6942	-0.0268629	6.51305	0.171817	0.67952	1
CG12123	12.398	8.41926	9.11011	9.95649	5.34845	16.3923	10.9765	10.9801	9.27949	11.2837	-0.405654	3.39824	7.52648	0.00737972	0.298888
CG12125	22.3963	25.4449	25.4324	32.8564	27.9308	28.4132	25.2459	30.8054	23.5301	28.435	-0.0191333	4.73819	0.028363	0.952213	1
CG12126	0	0	0	0	0	0	0	0	0	0	0	-1.30545	0	1	1
CG12128	13.5978	16.6514	16.7019	17.9217	17.531	14.2066	18.4771	19.5202	19.2218	17.6026	-0.0995405	4.20619	0.549178	0.482066	1
CG12129	18.397	11.787	17.0815	17.6728	12.7768	17.0479	17.1965	15.2502	14.2506	14.4432	-0.0304247	3.95387	0.0368503	0.848217	1
CG1213	121.18	149.489	130.958	127.443	143.22	204.138	141.597	179.037	131.238	132.471	-0.22845	7.52475	2.65478	0.106847	0.808604
CG12133	0	0	0	0	0	0	0	0	0	0	0	-1.2276	0	1	1
CG12134	3.99934	3.92899	6.07341	5.72498	2.07995	6.77546	4.93942	3.96505	6.62821	3.83647	-0.265417	2.53503	0.979531	0.325054	0.95402
CG12147	0	0	0.379588	0	0	0	0	0	0	0	1.71731	-1.25635	2.26743	0.214216	0.886663
CG12155	26.7956	26.9416	32.6446	23.8956	22.5823	26.8833	27.0753	24.0953	24.193	28.8864	0.00866321	4.85911	0.00714674	0.932822	1
CG12158	221.963	345.002	298.736	252.895	224.932	281.51	384.543	326.659	256.843	270.81	-0.177584	8.07607	1.36096	0.246553	0.886663
CG12159	22.3963	21.703	25.812	23.8956	18.1253	26.4462	23.2336	20.7402	21.8731	27.9837	-0.112197	4.49437	0.978929	0.325202	0.95402
CG12162	53.1912	47.7091	41.3751	39.3281	47.2446	47.6468	45.5524	36.6004	41.7577	45.1349	0.0727784	5.67106	0.538107	0.465187	1
CG12163	306.35	310.39	272.165	224.768	219.881	304.677	285.937	243.088	288.327	321.135	-0.114723	8.00131	1.5328	0.219017	0.886663
CG12164	0.399934	0	0	0	0	0.65569	0.365883	1.52502	0	0	-2.64354	0.686846	6.80286	0.0107074	0.361094
CG12170	27.1955	25.0707	18.9794	21.9043	23.1766	33.8773	22.3188	24.7053	18.2276	26.1783	-0.112921	4.5868	0.912228	0.342165	0.966108
CG12171	20.7966	20.9546	16.3223	14.188	14.5597	24.9162	17.7453	12.2001	21.2103	18.5053	-0.126939	4.07034	0.617793	0.434	1
CG12173	21.1965	13.2837	15.1835	11.201	10.6969	18.1408	15.1841	11.2851	13.9192	15.7972	-0.0887314	3.91887	0.393786	0.531956	1
CG12177	27.1955	28.9997	29.6079	32.3586	30.0107	30.3803	31.8318	25.9253	26.5128	32.2715	0.00884425	4.71396	0.0044164	0.947167	1
CG12179	6.39895	6.7354	6.83258	3.73368	5.34845	4.58983	6.95177	6.10007	6.2968	9.25266	-0.205593	2.80912	0.847199	0.359886	0.988889
CG1218	9.99835	8.41926	8.35094	6.96954	9.21122	8.74254	6.58589	8.8451	10.6051	11.5094	-0.107226	3.17584	0.238448	0.626556	1
CG12182	12.7979	13.2837	13.6652	14.6858	16.3425	16.1737	16.6477	14.9452	14.2506	13.3148	-0.0920603	3.89928	0.476236	0.491965	1
CG12184	0	0.187095	0	0.248912	0	0.218563	0.548824	0	0	0.225675	-0.930342	-0.887792	0.919634	0.340645	0.964964
CG12194	90.3851	93.3602	85.4073	86.1236	96.8663	97.2607	98.2395	114.681	74.8987	91.6239	-0.0764928	6.65929	0.648375	0.422885	1
CG12200	0.399934	0.187095	0	0.746737	0.297136	0	0.182941	0	0.33141	0	1.56094	-1.01058	2.50836	0.11794	0.81276
CG12203	121.18	113.379	95.6562	91.3508	98.9463	104.255	100.069	101.566	96.109	103.81	0.0402469	6.92512	0.130433	0.718858	1
CG12204	6.39895	5.61284	3.41629	1.9913	2.37709	1.31138	5.3053	2.13502	5.63397	3.83647	0.113728	2.22231	0.100334	0.752187	1
CG12206	0.399934	0.748378	0	0	0	0.65569	0	1.22001	1.65705	0.677024	-1.42711	0.60611	4.80818	0.050085	0.673409
CG12207	110.782	107.766	95.2766	100.809	105.78	106.44	106.106	111.326	88.818	104.036	0.00951025	6.58759	0.0234701	0.913653	1
CG12209	0	0.935473	0	0.497824	0	0	0.182941	0	0	0.225675	1.67216	-0.951016	2.98432	0.0876161	0.769321
CG12213	83.1863	77.4572	73.2605	79.1541	65.6671	77.8086	80.3112	66.4908	78.5442	79.2118	-0.0154427	6.2462	0.0330767	0.856107	1
CG12219	14.7976	17.3998	15.5631	13.6902	11.2912	13.7695	15.733	10.9801	12.5936	13.7662	0.116139	3.94798	0.563746	0.454777	1
CG12224	13.5978	8.04507	11.0081	10.7032	10.1026	16.1737	12.44	10.9801	12.2622	11.2837	-0.264229	2.92525	1.04269	0.310023	0.940299
CG12229	0	0	0	0	0	0	0	0.305003	0	0	-1.56134	-0.941001	1.24385	0.267942	0.890495
CG12231	0	0	0	0	0	0	0	0	0	0	0	-1.20714	0	1	1
CG12236	53.9911	49.5801	47.4485	42.0662	37.142	36.5001	49.76	43.0055	45.4032	48.9714	0.0381213	5.47183	0.133371	0.715847	1
CG12237	64.3894	73.3411	59.5953	56.5031	59.1301	71.9074	70.4324	59.7807	61.6423	66.1227	-0.0761431	6.13705	1.0181	0.315763	0.944753
CG12239	448.326	407.679	365.923	241.694	153.025	183.812	488.27	226.313	435.805	444.128	-0.139261	8.52481	0.230659	0.632238	1
CG12241	29.5951	30.1222	28.0895	32.6075	24.9594	32.1288	33.6612	28.6703	23.5301	32.7228	-0.057326	5.08259	0.374081	0.54238	1
CG12253	14.7976	9.91601	9.86929	9.20975	12.1826	11.5839	15.0012	11.2851	7.95385	9.70401	-0.0233588	3.61126	0.0201463	0.887457	1
CG12256	3.19947	2.43223	2.65712	2.48912	0.891408	3.93414	6.22001	2.74503	3.64551	5.86754	-0.981743	2.02262	6.24252	0.0143476	0.406768
CG12259	11.998	7.67088	7.21217	3.48477	2.67422	7.64972	6.76883	4.57505	7.29103	8.12429	-0.105084	2.91993	0.191208	0.662994	1
CG12262	245.56	191.585	166.26	143.622	149.162	341.177	169.587	132.677	171.339	196.337	-0.178518	6.99319	0.801752	0.373036	1
CG12263	27.9954	25.8191	24.2936	26.8825	30.0107	28.8504	25.7947	31.1104	24.8558	26.1783	-0.0183269	4.85497	0.0233321	0.87895	1
CG12264	58.3904	50.3284	52.0036	48.7868	47.8389	71.4702	62.5659	70.4558	58.3282	58.4497	-0.323554	5.68563	12.7896	0.000571484	0.0677958
CG12267	5.19914	5.79993	8.35094	8.96084	8.91408	9.83535	7.13471	4.57505	8.94808	5.86754	0.0302141	2.90103	0.0239522	0.935304	1
CG12268	9.59842	7.10959	5.31423	5.72498	5.64558	6.33834	5.12236	7.32008	4.30833	6.09322	0.183482	2.78874	0.517037	0.474031	1
CG12269	81.1866	65.6702	47.4485	62.9748	43.679	53.1109	60.7365	54.9006	63.2994	60.2551	0.041849	6.07295	0.08727	0.768379	1
CG1227	10.7982	7.85797	11.7672	11.201	11.8854	14.8623	10.7935	10.9801	9.94231	11.2837	-0.134411	3.45997	0.503108	0.480031	1
CG12272	36.394	33.1157	40.9955	36.3412	36.8449	34.3145	32.9294	30.8054	35.7923	33.8512	0.127143	5.18319	1.8044	0.182668	0.886663
CG12278	1.59974	0.187095	0.759176	0	1.18854	0.437127	0.182941	0	0.33141	0	1.68044	-0.556099	4.03041	0.0477841	0.662207
CG12279	5.99901	10.6644	10.2489	8.46302	7.72554	12.2395	10.6106	7.32008	8.94808	10.6067	-0.201971	3.44521	1.74728	0.190497	0.886663
CG12288	1.99967	1.49676	3.0367	2.24021	1.78282	0.65569	1.82941	0.610007	0.662821	1.8054	0.805038	1.28117	2.82283	0.0965127	0.787981
CG12289	0	0	0	0	0	0	0	0	0	0	0	-1.30545	0	1	1
CG12290	46.3924	47.522	53.9015	58.9922	51.1074	46.1169	45.5524	48.8006	53.3571	40.1701	0.144749	5.57521	1.75171	0.189122	0.886663
CG12299	46.7923	41.9092	40.2363	31.6119	30.3079	28.1947	44.2718	37.2104	30.4897	36.785	0.0993733	5.3565	0.610296	0.436793	1
CG12301	9.99835	8.98054	8.35094	7.71628	3.2685	4.58983	9.14707	5.79507	8.28526	5.41619	0.198616	3.22453	0.599879	0.44072	1
CG12304	27.9954	30.8706	29.9875	30.3673	26.7422	32.1288	30.0024	31.7204	26.1814	31.1431	-0.0503745	4.98934	0.268069	0.605942	1
CG12307	0	0	0	0	0	0	0	0.305003	0	0	-1.56254	-1.28329	1.54147	0.265234	0.886663
CG12309	0	0	0	0	0	0	0	0.305003	0	0	-1.56239	-1.24038	1.51677	0.265234	0.886663
CG1231	7.99868	6.7354	7.21217	7.21845	4.75418	6.77546	7.13471	7.01508	5.30256	9.47834	-0.093244	2.81691	0.2233	0.637718	1
CG12310	0	0	0	0	0	0	0	0	0	0	0	0.284939	0	1	1
CG12316	32.7946	31.0577	34.5425	31.3629	22.2852	19.4521	29.0877	26.5353	30.8212	31.1431	0.148975	4.98621	1.0013	0.319765	0.948584
CG12320	7.59875	6.17412	6.07341	6.22281	2.07995	7.64972	7.13471	5.79507	4.30833	6.31889	-0.178454	2.91774	0.798767	0.373923	1
CG12321	11.5981	16.6514	14.0448	11.6989	10.1026	15.2994	12.623	10.9801	16.9019	13.3148	-0.0926483	3.71864	0.315684	0.666398	1
CG12325	14.3976	13.0966	11.3876	14.6858	9.80549	15.518	11.8912	11.5901	8.94808	14.2175	0.0178159	3.76814	0.0143943	0.963533	1
CG1233	40.7933	39.477	38.3384	31.3629	40.1134	42.8384	40.43	33.8554	39.1064	39.0417	-0.0441061	5.3005	0.272893	0.602723	1
CG12333	67.5889	54.2574	44.4118	46.0488	53.4845	51.1438	59.273	59.4757	45.7346	57.9984	-0.0473756	5.87062	0.238708	0.626367	1
CG12338	42.393	55.0058	45.5506	36.0923	40.1134	64.9133	42.9912	38.7354	44.409	46.7147	-0.116974	5.39873	0.48516	0.487947	1
CG1234	13.9977	12.9095	14.4243	8.71193	13.074	12.4581	13.7206	11.5901	9.6109	13.7662	0.0209006	3.8029	0.0146643	0.903894	1
CG12341	18.7969	10.8515	14.8039	16.1793	13.9654	17.0479	15.9159	17.6902	15.2449	15.3459	-0.141579	4.18665	1.11503	0.29391	0.92116
CG12343	21.5964	22.8255	22.0161	17.9217	16.3425	21.8563	19.7577	14.9452	18.8904	23.2445	0.0207229	4.38142	0.0225209	0.927642	1
CG12344	16.3973	11.9741	20.8773	19.6641	26.4451	25.7905	13.3547	24.0953	17.8962	11.9608	0.0323352	4.04125	0.0227535	0.880448	1
CG12347	0	0	0	0	0	0	0	0	0	0	0	-1.28385	0	1	1
CG12355	65.5892	53.8832	62.632	74.1758	74.5811	71.0331	54.5165	66.7958	52.6942	52.8079	0.150082	5.65567	1.03014	0.312935	0.942841
CG1236	14.3976	13.6579	14.0448	15.9304	15.7482	21.8563	19.3918	11.8951	15.2449	14.2175	-0.176036	4.02841	1.55464	0.215791	0.886663
CG12360	83.5862	82.6958	86.1665	77.1628	80.2267	84.1469	89.4583	76.8609	78.8756	83.951	-0.0149038	6.27453	0.0514595	0.821074	1
CG12362	0	0	0	0.497824	0	0	0.182941	0.305003	0.662821	0	-0.725146	-0.819014	0.427205	0.520869	1
CG12374	0	0.187095	0	0.248912	508.994	2.18563	0.182941	1.22001	3.97692	1.35405	5.94855	4.01347	30.5378	4.51038e-07	0.000290174
CG12375	31.1949	26.3803	22.3957	22.651	26.4451	30.5989	29.8194	23.1803	33.141	25.9526	-0.148235	4.63608	1.48427	0.226395	0.886663
CG12376	0.399934	0	0	0	0	0	0	0.305003	0.33141	0	-0.596552	-1.24852	0.239101	0.649853	1
CG12379	3.59941	2.61932	2.65712	2.73803	2.07995	3.71558	3.84177	1.83002	2.98269	2.48242	-0.154739	1.65678	0.264617	0.608267	1
CG12384	57.9904	63.0509	56.9382	56.5031	72.204	89.3924	65.1271	68.6258	64.9564	62.7376	-0.193512	5.91714	3.42754	0.0675034	0.742616
CG1239	4.79921	5.42574	6.83258	4.48042	5.05131	7.86828	5.67118	6.10007	4.63974	5.19052	-0.164558	2.56457	0.386544	0.535744	1
CG12391	30.395	29.1868	28.4691	15.9304	13.9654	21.6378	33.8441	18.3002	32.4782	26.6296	-0.184167	4.84019	0.681108	0.411458	1
CG12393	29.1952	25.4449	16.3223	23.6467	18.4224	19.2336	27.8071	22.2653	26.1814	26.8553	-0.111947	4.82486	0.713233	0.400684	1
CG12395	0	0	0	0	0	0	0	0	0	0	0	-1.26917	0	1	1
CG12398	0.399934	0	0	0	0	0	0	0.305003	0.33141	0	-0.596263	-1.11011	0.236867	0.649853	1
CG12400	145.576	114.128	96.795	109.77	88.5465	116.057	111.411	94.2461	104.726	97.4915	0.0796155	6.91478	0.549273	0.460607	1
CG12402	31.9947	32.5545	38.718	39.0792	41.3019	35.4073	36.4053	41.1755	34.4667	39.0417	-0.0222883	5.11907	0.0423232	0.837485	1
CG12404	28.3953	31.0577	29.6079	33.6031	35.9535	45.4612	34.9418	36.9054	39.4378	41.2985	-0.316608	5.08198	9.68629	0.00251054	0.164039
CG12413	8.79855	9.35473	6.83258	8.2141	5.34845	8.08685	9.33001	9.45511	9.27949	12.8635	-0.334978	3.39891	2.99477	0.0870722	0.768173
CG12420	0	0.187095	0	0.497824	0.297136	0.218563	0.182941	0	0.33141	0.225675	0.171307	-0.346332	0.0397316	0.84247	1
CG12426	0	0	0	0	0	0	0	0	0	0	0	-1.05818	0	1	1
CG12428	36.7939	24.3223	36.4405	26.3847	23.4737	42.4013	31.6489	21.0452	30.4897	32.4972	-0.125575	4.87943	0.45577	0.501394	1
CG12438	0	0	0	0	0	0.218563	0	0	0	0	-1.53259	-1.26934	1.46999	0.265234	0.886663
CG12439	0	0	0	0	0	0	0	0	0	0	0	-1.29814	0	1	1
CG12446	0	0	0	0	0.297136	0	0	0	0	0	1.69703	-1.2484	1.90301	0.214216	0.886663
CG12448	0	0.374189	0	0	0	0	0.365883	0.305003	0	0	-0.351066	-0.851837	0.0872836	0.778667	1
CG1246	0.799868	0.187095	0.379588	0.497824	8.31981	0.437127	0.365883	0	0.33141	0.677024	2.33279	0.163108	9.93818	0.00222011	0.15409
CG12464	0	0	0	0	0	0	0	0	0	0	0	-1.30545	0	1	1
CG12470	1.1998	0.748378	0.379588	0.995649	1.18854	0.65569	0.731765	2.44003	0.662821	0.902699	-0.204598	0.646943	0.174771	0.714281	1
CG12477	0	0	0	0.248912	0	0.218563	0	0	0	0.225675	-0.578024	-1.22648	0.23901	0.649853	1
CG12479	0	0	0	0	0	0	0	0	0	0	0	-1.29133	0	1	1
CG12480	0	0	0	0	0	0	0	0	0	0	0	-1.16784	0	1	1
CG12481	0	0	0	0	0	0	0	0	0	0	0	-1.30545	0	1	1
CG12483	0.799868	2.43223	1.89794	0.995649	0.891408	1.96707	0.914707	1.22001	1.32564	0.677024	0.26667	1.29718	0.289127	0.592151	1
CG12484	125.179	128.16	114.256	143.871	121.529	121.084	125.498	128.101	118.313	122.09	0.0427515	6.98961	0.351949	0.554548	1
CG12490	0	0	0	0	0	0	0	0	0	0	0	-1.07803	0	1	1
CG12491	0	0	0	0	0	0	0	0	0	0	0	-1.30545	0	1	1
CG12493	0	0.187095	0	0	2.07995	0	0.365883	0.91501	0.33141	0.225675	0.373775	-0.747851	0.165297	0.685322	1
CG12496	0	0	0	0	0	0	0	0	0	0	0	-1.24806	0	1	1
CG12498	0	0	0	0	0	0	0	0	0	0	0	-1.23493	0	1	1
CG12499	17.1972	14.9676	21.2569	14.188	17.2339	13.7695	19.2088	14.0302	13.5878	19.8594	0.0502403	4.27434	0.0713939	0.789949	1
CG12502	100.383	97.2892	98.3133	100.561	89.4379	87.8625	104.46	94.8561	102.074	99.9739	-0.00986928	6.75538	0.016337	0.898589	1
CG12506	0	0	0	0	0	0	0	0	0	0	0	1.63259	0	1	1
CG12507	0	0.561284	0.379588	0.497824	0.297136	0.218563	0	0.91501	0.662821	0	0.274884	-0.593637	0.116203	0.73401	1
CG12511	0	0	0	0	0	0	0	0	0.33141	0	-1.56887	-1.28365	1.62896	0.265234	0.886663
CG12512	42.793	51.8252	48.9669	41.0705	49.3246	69.066	52.5042	34.4654	46.066	49.8741	-0.111606	5.51549	0.929911	0.337553	0.963093
CG12516	0	0	0	0	0	0	0	0	0	0	0	-1.29089	0	1	1
CG12517	0	0	0	0.248912	0	0.218563	0	0.305003	0	0	-0.602375	-1.00964	0.196621	0.659079	1
CG12519	0.399934	0	0	0	0.594272	0	0	0	0	0	2.98727	-1.17899	5.00365	0.031452	0.573092
CG12520	0.399934	1.30966	1.51835	1.49347	0.297136	1.96707	1.28059	1.22001	1.32564	2.7081	-0.716155	0.379263	2.34578	0.129244	0.839749
CG12521	0.399934	0	0	0	0	0	0	0.610007	0	0	-0.590208	-1.0586	0.228198	0.649853	1
CG12522	0.799868	0.935473	1.51835	0.746737	0.594272	1.31138	1.46353	0	1.65705	0.902699	-0.255446	-0.083964	0.146569	0.703121	1
CG12523	0	0	0	0	0	0	0.182941	0	0	0.225675	-2.24023	-1.23487	2.7925	0.115122	0.808604
CG12531	214.765	200.191	212.19	280.275	241.274	198.456	227.396	232.413	236.296	214.617	0.0514913	7.96295	0.216584	0.642816	1
CG12535	0	0.187095	0	0.248912	0.594272	0.437127	0.365883	0	0	0.451349	-0.301004	-0.84726	0.107538	0.743789	1
CG12538	0	0	0	0	0	0	0	0	0	0	0	-1.29828	0	1	1
CG12539	0	0.374189	0.379588	0	0	0.65569	0	0	0	0	0.167075	-1.06429	0.0208637	0.885583	1
CG12540	0	0	0	0	0.297136	0	0	0	0	0	1.69703	-1.2495	1.64421	0.214216	0.886663
CG12541	59.9901	52.3865	58.077	71.6867	69.827	50.2696	52.6871	65.5758	56.6712	53.9363	0.163053	5.32239	1.82047	0.180751	0.886663
CG12546	0	0	0	0	0	0	0	0	0	0	0	-1.30545	0	1	1
CG12547	119.58	107.392	134.754	150.592	152.728	159.551	121.29	152.197	133.227	120.962	-0.0470985	6.85636	0.126658	0.722782	1
CG12560	14.7976	11.2257	15.9427	14.188	13.074	15.9551	12.2571	10.0651	9.94231	10.6067	0.20867	3.60512	1.17097	0.282186	0.908137
CG12567	80.7867	82.3216	98.3133	125.701	117.963	124.144	85.6165	118.951	99.0917	91.1726	-0.0364125	6.30905	0.0564645	0.812731	1
CG12576	132.378	131.34	116.913	118.98	169.368	132.449	117.448	138.472	122.953	136.533	0.0469405	6.89955	0.355798	0.552395	1
CG12581	98.7837	116.186	101.35	99.8138	109.94	123.488	102.447	121.086	112.017	108.775	-0.107501	6.76455	1.72178	0.192909	0.886663
CG12582	79.5869	67.5411	66.8075	56.2542	69.5298	90.9224	71.713	65.2707	66.2821	71.7646	-0.113643	6.11199	1.60092	0.209144	0.886663
CG12589	0	0	0	0	0	0	0	0	0	0	0	-1.18775	0	1	1
CG12590	1.1998	1.12257	1.89794	1.49347	2.97136	0.65569	1.09765	1.52502	0.33141	1.57972	0.695883	0.528099	2.07613	0.153201	0.886663
CG12592	0	0.187095	0	0	0	0	0	0	0	0	1.6486	-0.938341	1.66462	0.214216	0.886663
CG12594	46.7923	42.4705	42.1343	48.289	46.0561	45.8983	45.1865	46.6655	47.0603	37.6877	0.0222731	5.55105	0.0791532	0.779115	1
CG12605	176.371	209.359	168.917	224.519	199.378	165.89	180.38	228.143	177.967	196.111	0.0478676	7.54733	0.201197	0.654869	1
CG12607	0	0	0	0.497824	0	0	0	0	0	0	2.43133	-1.13745	3.033	0.08716	0.768543
CG12608	24.7959	23.1997	20.8773	21.9043	15.4511	18.7965	26.5265	17.9952	17.5647	20.3107	0.0585663	4.39446	0.155811	0.745569	1
CG12609	0.399934	0	0	0	0	0	0	0	0.33141	0.225675	-0.571131	-1.173	0.201919	0.654936	1
CG12617	0	0	0	0	0	0	0	0	0	0	0	-0.984795	0	1	1
CG12620	0	0	0	0	0	0	0	0	0	0	0	-1.29802	0	1	1
CG12637	0	0	0	0	0	0	0	0	0	0	0	-1.27062	0	1	1
CG12640	0	0	0	0	0	0	0.182941	0	0	0	-1.51416	-1.0568	1.31305	0.265234	0.886663
CG12643	6.79888	5.23865	13.6652	5.47607	12.1826	16.1737	7.68354	9.45511	5.96539	8.12429	-0.174873	2.72142	0.367643	0.545868	1
CG12645	0	0	0	0	0	0.218563	0.182941	0	0	0	-2.23788	-1.09544	2.49959	0.119592	0.816783
CG1265	37.9937	31.4319	32.265	34.5988	35.062	33.0031	30.9171	27.7553	28.8327	28.8864	0.191027	5.26507	2.08064	0.152761	0.886663
CG12655	5.59908	2.99351	5.31423	2.98695	5.34845	5.46408	3.47589	5.79507	2.65128	3.15945	0.0594615	3.01251	0.0475623	0.939089	1
CG12659	2.3996	2.05804	1.89794	2.48912	3.56563	1.96707	2.56118	4.57505	1.98846	2.03107	-0.0614811	1.68953	0.0360521	0.862265	1
CG12661	0	0	0	0	0	0	0	0	0	0	0	-1.27674	0	1	1
CG12662	0	0	0	0	0	0	0	0	0	0	0	-1.26239	0	1	1
CG12672	3.99934	2.43223	1.51835	1.49347	1.48568	2.18563	2.74412	2.74503	3.3141	2.7081	-0.338216	1.57464	0.978422	0.325326	0.95402
CG12674	0	0	0	0	0	0	0	0	0	0	0	-1.27761	0	1	1
CG12679	0	0	0	0	0	0	0	0	0	0	0	-1.30545	0	1	1
CG12680	0	0	0	0	0.297136	0	0	0	0	0	1.69702	-1.24823	2.03219	0.214216	0.886663
CG12681	0.399934	0.187095	0	0	0.297136	0	0	0	1.32564	0	-0.265139	-0.955143	0.0464555	0.829966	1
CG12682	0	0	0	0	0	0	0	0	0	0	0	-1.22849	0	1	1
CG12684	0	0	0	0	0	0	0	0	0	0	0	-1.23676	0	1	1
CG12688	0	0	0	0.248912	0	0	0.731765	0.305003	0	0.225675	-1.90078	-0.862322	2.87243	0.0938497	0.783345
CG12689	0	0.187095	0.379588	0	0.594272	0.218563	0.182941	0.305003	0.33141	0	0.189397	-0.886428	0.0369615	0.847991	1
CG12691	0	0	0	0	0	0	0	0	0	0	0	-1.30545	0	1	1
CG12692	0	0	0	0	0	0	0	0	0	0	0	-1.29072	0	1	1
CG12693	0	0	0	0	0.297136	0.218563	0	0.305003	0	0.225675	-1.06374	-1.03137	0.778823	0.380923	1
CG12698	0	0	0	0.248912	0	0.218563	0.182941	0	0	0	-0.558116	-1.02949	0.207741	0.650014	1
CG12699	0	0	0	0.248912	0	0	0	0	0	0	1.67984	-1.23213	1.34049	0.25574	0.886663
CG12702	0.399934	0.748378	0.759176	0.497824	0.891408	0	0	0	0.33141	0.225675	2.49071	-0.0853266	6.29785	0.0139364	0.402616
CG12708	0.399934	0.187095	0	0	0	0.437127	0.182941	0.305003	0	0.225675	-0.945688	-0.43545	0.659206	0.419548	1
CG1271	22.7962	27.1287	20.8773	22.651	27.0394	27.1019	27.8071	17.3852	24.5244	21.6648	0.0242136	4.47957	0.0383019	0.845294	1
CG12713	1.59974	4.49027	3.41629	3.23586	2.37709	3.93414	3.47589	3.96505	2.98269	2.93377	-0.147871	1.67398	0.278019	0.710221	1
CG12715	0	0	0	0	0	0	0	0	0	0	0	-1.1543	0	1	1
CG12716	1.59974	0.748378	0	0.497824	0.297136	1.31138	0.731765	0.91501	0	1.12837	-0.462015	2.05259	0.723386	0.397366	1
CG12717	16.7972	15.1547	17.8406	17.6728	15.7482	12.4581	17.9283	13.7252	19.5532	17.1513	0.0393946	4.23802	0.0587896	0.808989	1
CG12721	0.799868	0	0	0	0.297136	0	0	0	0	0.225675	1.45838	-0.231704	0.881186	0.350884	0.977716
CG12723	0	0.187095	0	0	0.594272	0	0.365883	0.305003	0	0	0.197079	-0.969256	0.0314536	0.859709	1
CG12725	0	0	0	0	0	0	0	0	0	0	0	-1.24748	0	1	1
CG12728	13.9977	14.2192	15.1835	11.9478	16.0453	15.7366	12.2571	15.2502	15.5763	15.3459	-0.0536558	3.68123	0.103136	0.748867	1
CG12729	0	0	0	0	0	0	0	0	0	0	0	-1.29111	0	1	1
CG1273	0.399934	0	0.379588	0	0	0	0.365883	0	0	0.225675	-0.206374	-0.696323	0.0337058	0.854781	1
CG12730	49.9918	47.3349	37.1996	41.5683	52.2959	59.6678	49.943	50.3256	42.0891	40.3958	-0.087476	5.32781	0.565737	0.453984	1
CG12736	33.1945	36.1093	36.82	35.8434	46.3532	38.03	35.1247	31.1104	32.8096	34.3026	0.133963	5.04449	1.66797	0.199945	0.886663
CG12744	1.59974	2.99351	2.27753	2.24021	5.05131	1.52994	2.56118	2.74503	2.98269	2.25675	0.266737	1.30819	0.484302	0.488331	1
CG12746	50.7916	54.0703	52.0036	46.7955	58.5358	49.1768	50.6748	53.3756	46.7289	60.0295	0.0113424	5.71474	0.0174012	0.895357	1
CG1275	174.371	149.301	150.317	187.929	181.253	190.806	158.793	176.292	137.867	165.194	0.0235824	7.40053	0.0687807	0.793739	1
CG12766	3.59941	3.18061	2.27753	3.73368	5.34845	4.1527	3.84177	2.44003	2.31987	2.48242	0.23048	1.31608	0.409896	0.523702	1
CG12768	21.5964	27.3158	25.0528	19.4152	27.0394	17.9222	22.6847	22.8753	27.5071	23.9215	0.0769881	4.32939	0.386967	0.535521	1
CG12769	61.9898	61.1799	71.3626	75.4204	71.9069	57.7007	72.2618	63.7457	70.5904	64.543	0.056016	5.99418	0.309013	0.579711	1
CG12772	28.3953	29.3738	25.4324	29.1227	29.1193	31.2546	27.4412	29.5853	26.5128	31.8201	-0.0499398	4.97713	0.260755	0.617398	1
CG12773	40.3933	37.606	45.5506	43.0618	40.1134	46.7726	36.9542	36.9054	38.1122	46.0376	0.00830386	5.3027	0.00528858	0.942193	1
CG12780	0	0	0	0	2.37709	0.65569	0	0	0	0	1.5502	-0.973315	1.70323	0.198779	0.886663
CG12782	0	0	0	0	0	0	0	0	0	0	0	-1.30545	0	1	1
CG12783	0	0.374189	0	0.248912	0.594272	0.218563	0.365883	0	0.662821	0.225675	-0.0808432	-0.39427	0.00962412	0.958382	1
CG12784	0	0	0	0	0	0	0	0	0	0	0	-1.30545	0	1	1
CG12788	0	0	0	0	0	0	0	0	0	0	0	-1.30545	0	1	1
CG12795	20.3966	17.774	15.5631	14.9347	15.1539	16.1737	18.843	11.5901	20.216	17.1513	-0.00999611	4.38094	0.00494553	0.944096	1
CG12796	0	0.187095	0	0	0.297136	0	0	0	0	0.225675	0.881595	-1.14165	0.497623	0.483314	1
CG12811	17.1972	19.0836	16.3223	13.4413	13.6683	32.1288	17.5624	15.2502	19.2218	18.731	-0.372116	4.03726	4.38599	0.0391383	0.615856
CG12814	66.789	69.9734	69.8442	84.3812	79.9296	83.4912	81.226	76.8609	86.1667	78.7605	-0.129898	6.1415	1.53264	0.21904	0.886663
CG12817	16.7972	16.0901	12.1468	13.9391	13.6683	15.0809	15.55	16.7752	14.9135	14.4432	-0.0744478	4.49268	0.335133	0.606314	1
CG12818	4.39928	4.49027	4.93464	5.47607	4.45704	4.58983	6.03706	3.05003	8.61667	5.86754	-0.235208	2.49872	0.558271	0.456968	1
CG12822	42.393	47.3349	40.6159	42.0662	38.9248	38.4672	40.0642	39.0404	38.775	41.9755	0.0941661	5.34887	1.15821	0.284806	0.910145
CG12824	0.399934	0.187095	0	0	0	0.437127	0.182941	0	0	0.225675	-0.639532	-0.590414	0.316016	0.575454	1
CG12825	3.19947	3.5548	1.13876	2.24021	11.8854	2.62276	2.92706	4.27005	2.31987	3.15945	0.538252	1.77443	2.55254	0.113735	0.808604
CG12826	0.399934	0.187095	0.379588	0.248912	0	0	0.914707	0	0.33141	0	-0.248395	-0.76485	0.0642654	0.800503	1
CG12828	0	0	0.379588	0.497824	0	0	0	0	0	0	2.95331	-1.19932	5.01512	0.031452	0.573092
CG12831	0	0	0	0	0	0	0	0	0.33141	0	-1.56849	-1.20611	1.61262	0.265234	0.886663
CG12836	0.799868	1.12257	0.759176	2.24021	0.594272	1.09282	0.914707	2.13502	0.662821	1.12837	-0.0308513	0.544089	0.00338618	0.954091	1
CG12848	17.1972	13.4708	12.5264	13.9391	11.8854	15.9551	11.5253	13.7252	10.6051	14.6689	0.0427849	3.86631	0.0798436	0.817177	1
CG12849	0	0	0	0	0	0	0	0	0	0	0	-1.2908	0	1	1
CG12851	75.1876	73.3411	81.2318	87.1193	79.6324	69.066	64.3954	70.1508	74.2359	74.0213	0.173559	6.19339	3.92572	0.0507043	0.677962
CG12853	0	0	0	0.248912	0	0	0	0	0	0.451349	-0.580999	-1.02952	0.230291	0.649853	1
CG12857	0.799868	0.935473	0.379588	1.24456	0.891408	1.09282	0.548824	0.610007	0.33141	1.57972	0.0372638	0.350386	0.00579577	0.93949	1
CG12858	311.949	312.448	364.405	403.985	404.105	316.261	317.952	376.679	346.655	317.75	0.101752	8.51991	1.52823	0.219699	0.886663
CG12859	83.9862	60.8057	58.077	61.2324	52.5931	69.7217	56.163	53.9856	52.0314	54.3876	0.138015	6.16417	1.25969	0.264791	0.886663
CG12860	0	0	0	0	0	0	0	0	0	0	0	-1.22343	0	1	1
CG12861	0	0	0	0	0	0	0	0	0	0	0	-1.29807	0	1	1
CG12862	0	0	0	0	0	0	0	0	0	0	0	-1.27716	0	1	1
CG12863	5.19914	7.29669	9.11011	6.72063	6.83413	6.77546	6.58589	9.1501	4.30833	8.34996	-0.00379878	2.83231	0.000368998	0.984718	1
CG12866	0	0	0	0	0	0	0	0	0	0	0	-1.27693	0	1	1
CG12868	13.1978	13.0966	12.906	14.188	16.3425	18.5779	12.9888	11.2851	14.9135	11.7351	0.00365122	3.69989	0.000460596	0.984386	1
CG12869	1.99967	1.49676	1.51835	0.995649	1.18854	0.874254	0.731765	0.91501	1.32564	1.35405	0.456697	0.956804	1.36916	0.270883	0.894712
CG1287	0	0.374189	0	0	1.48568	1.96707	0.365883	0	0.33141	0.225675	-0.613062	-0.51765	0.553175	0.459023	1
CG12877	21.1965	20.9546	17.461	17.6728	15.7482	14.4252	17.3794	17.0802	20.5474	25.7269	-0.0289859	4.49029	0.0280676	0.867338	1
CG1288	0	0	0	0	0	0	0	0	0	0	0	-1.29066	0	1	1
CG12880	2.3996	1.87095	3.41629	3.48477	2.07995	1.74851	2.1953	2.44003	1.32564	2.03107	0.412183	1.36513	1.52576	0.220068	0.886663
CG12883	5.19914	4.67736	7.97135	4.97824	2.67422	5.02696	5.12236	6.10007	2.98269	5.64187	-0.00101293	2.44264	2.04397e-05	0.996403	1
CG12885	4.39928	1.87095	1.51835	1.9913	2.07995	3.27845	3.11	3.96505	0.994231	1.8054	-0.206329	1.28155	0.287691	0.59307	1
CG12895	25.9957	22.4513	24.6732	29.6206	26.4451	31.2546	24.5141	33.5504	27.1756	20.9877	-0.0860192	4.68665	0.505238	0.479105	1
CG12896	3.59941	3.92899	1.51835	2.24021	1.78282	6.5569	1.28059	4.27005	5.30256	3.15945	-0.599967	1.29917	2.27088	0.135441	0.855234
CG12898	0.399934	0.187095	0	0.248912	0	0.218563	0	0.305003	0	0	0.646307	-1.20839	0.443969	0.537353	1
CG12902	0	0	0	0	0	0	0	0	0	0	0	-1.30545	0	1	1
CG12907	0	0	0	0	0	0	0	0	0	0	0	-1.30545	0	1	1
CG12909	4.39928	2.80642	4.93464	3.23586	1.48568	3.05989	2.56118	3.96505	3.3141	3.38512	0.0237405	1.97551	0.00439327	0.947305	1
CG1291	28.7953	18.3353	13.6652	16.6771	17.2339	19.8893	21.2212	16.4702	19.2218	19.6337	-0.0425095	4.19737	0.100169	0.752383	1
CG12910	11.1982	9.91601	9.4897	9.95649	9.21122	10.7096	9.87883	10.0651	7.62244	11.7351	-0.0209719	4.01145	0.0216973	0.883235	1
CG12911	1.1998	1.30966	0.759176	0.497824	1.48568	0.218563	0.731765	0.305003	0.33141	0.902699	0.990737	-0.0961456	2.60314	0.110267	0.808604
CG12912	0	0	0	0	0	0	0	0	0	0	0	-1.30545	0	1	1
CG12913	29.1952	24.6965	28.8487	27.6293	26.148	26.8833	21.953	27.1453	23.5301	23.6958	0.144471	4.74976	2.07482	0.153329	0.886663
CG12914	0	0	0	0	0	0	0	0	0	0	0	-1.25519	0	1	1
CG12917	0	0	0	0	0	0	0.182941	0.305003	0	0.225675	-2.74432	-0.990932	4.00517	0.0536455	0.678766
CG12920	0	0	0	0	0	0	0	0	0	0	0	-1.18697	0	1	1
CG12923	0.399934	0.374189	0.379588	0.995649	0	0.874254	0.548824	0.91501	0.33141	0	-0.248938	-0.325357	0.139226	0.717102	1
CG12926	32.3947	26.0061	25.4324	20.1619	18.4224	20.3264	24.88	21.3502	27.5071	24.3729	0.0406688	4.37645	0.098357	0.760844	1
CG12929	2.79954	2.24513	3.0367	2.73803	2.67422	4.1527	2.1953	2.44003	4.30833	3.38512	-0.291509	2.10552	1.20729	0.28163	0.906799
CG12934	0.399934	0.187095	0	0	4.1599	0	0.182941	0.305003	0.33141	0.225675	2.12262	-0.656807	5.66466	0.0194902	0.472866
CG12935	3.99934	5.23865	3.41629	6.47172	5.94272	8.52397	6.58589	7.62509	5.30256	4.96484	-0.368946	2.84676	2.98679	0.0874868	0.769321
CG12942	10.7982	9.16763	9.11011	7.71628	5.34845	3.93414	12.44	7.32008	8.94808	7.67294	0.0453314	3.09117	0.0427955	0.907525	1
CG12945	41.5931	43.9672	45.9302	48.7868	58.5358	51.581	40.7959	51.5456	47.0603	43.3295	0.0312674	5.34478	0.0758474	0.783658	1
CG12947	5.19914	4.67736	1.51835	3.48477	5.34845	3.49701	5.12236	3.05003	4.30833	4.28782	0.000699436	2.53112	8.6928e-06	0.99771	1
CG12948	10.3983	11.4128	8.73052	9.20975	8.31981	10.2725	9.14707	9.45511	5.96539	7.44727	0.181302	3.47158	1.2717	0.262543	0.886663
CG12950	126.379	137.889	148.039	167.767	160.453	148.405	143.06	166.532	140.187	136.985	0.0120161	7.06924	0.0158646	0.900058	1
CG12951	0	0	0	0	0	0	0	0	0	0	0	-1.25749	0	1	1
CG12963	0	0	0	0	3.2685	0	0	0	0	0	4.72732	-0.718971	12.6733	0.000665661	0.0736055
CG12964	0.399934	0.561284	0.759176	0.995649	0	0.874254	1.09765	0.91501	1.32564	0.677024	-0.777071	0.309609	2.89353	0.151125	0.883445
CG12970	0	0	0.379588	0.248912	0.297136	1.31138	0.731765	0.610007	0.994231	0.451349	-2.09542	-0.717586	6.02127	0.0162219	0.434845
CG12971	0	0	0	0.248912	0	0	0.182941	0	0	0.225675	-0.561222	-0.916839	0.208069	0.649853	1
CG12974	0.399934	0.187095	0	0.497824	4.1599	0.437127	0.731765	0.91501	0.33141	1.12837	0.524172	0.0195064	0.613243	0.435692	1
CG12975	11.998	11.0386	10.2489	16.1793	12.1826	16.1737	13.3547	18.3002	13.5878	13.9918	-0.279423	3.89906	3.25782	0.0745361	0.742696
CG12983	0	0	0	0	0	0	0	0	0	0	0	-1.24143	0	1	1
CG12984	0	0	0	0	0	0	0	0	0	0	0	-1.23474	0	1	1
CG12985	0.399934	0.935473	1.51835	1.24456	1.48568	0.874254	1.09765	0.91501	0.662821	1.35405	0.163566	0.746813	0.12505	0.744358	1
CG12986	0	0	0	0	0	0	0	0.305003	0	0	-1.56225	-1.20795	1.62432	0.265234	0.886663
CG1299	46.3924	53.8832	47.0689	39.3281	46.6503	59.6678	53.4189	49.1056	55.3455	60.7065	-0.253328	5.81636	4.09641	0.0460363	0.653691
CG12990	0	0	0	0	0	0	0	0	0	0	0	-1.05847	0	1	1
CG12991	83.9862	83.2571	87.3052	96.8268	94.4892	86.9882	87.8118	88.756	78.5442	88.2388	0.0506476	6.48997	0.380248	0.539078	1
CG12992	1.1998	0.748378	1.51835	0.995649	1.48568	0.874254	0.182941	0.91501	0.994231	0.225675	0.919509	0.329138	2.60987	0.109814	0.808604
CG12994	18.397	13.2837	11.3876	9.45866	16.0453	19.2336	16.2818	13.7252	13.2564	14.8945	-0.198143	4.10101	1.97596	0.163371	0.886663
CG12995	2.79954	0.187095	0.379588	0.248912	0.594272	0.65569	0.182941	0.610007	0	0.451349	0.901516	-0.234583	1.3297	0.252513	0.886663
CG12998	0.799868	0.748378	0.759176	0.746737	0	0.65569	0.182941	0	0.662821	0.677024	0.467451	-0.139538	0.362161	0.54887	1
CG13000	0	0	0	0	0	0.437127	0	0	0	0	-2.25489	-1.23423	2.65894	0.115122	0.808604
CG13001	11.5981	12.9095	14.8039	13.1923	11.5883	17.4851	12.623	10.9801	11.9308	11.7351	-0.0228174	3.71005	0.0248117	0.875201	1
CG13002	0	0.187095	0	0	0	0	0.182941	0	0	0	0.134088	-0.942274	0.00663389	0.935302	1
CG13003	25.1958	17.3998	18.9794	21.6554	19.3138	14.4252	12.8059	24.7053	18.8904	15.7972	0.25359	4.57795	2.83287	0.0959312	0.787615
CG13004	13.1978	10.4773	13.6652	14.6858	14.5597	13.5509	15.0012	13.1152	13.2564	12.1864	-0.0224946	3.66857	0.0201032	0.887576	1
CG13005	8.39862	5.79993	7.97135	6.96954	6.53699	6.77546	5.85412	5.49006	4.63974	6.99592	0.228057	2.58915	1.16004	0.318032	0.948256
CG13008	1.1998	1.49676	1.89794	0.995649	0.594272	1.31138	1.46353	3.05003	1.98846	1.35405	-0.528315	1.00196	1.64191	0.203462	0.886663
CG13010	0	0.187095	0.759176	0.248912	0	0.437127	0	0	0	0	1.05998	-0.413692	0.951775	0.331967	0.960189
CG13012	14.3976	10.2902	12.906	9.45866	11.8854	8.9611	8.04942	9.1501	8.94808	9.92969	0.370144	3.48127	4.28671	0.0413696	0.62201
CG13014	5.19914	5.42574	3.0367	5.72498	4.45704	10.2725	7.50059	7.93009	4.63974	6.77024	-0.626947	2.7176	8.03472	0.00570213	0.263479
CG13016	7.99868	14.2192	8.35094	6.47172	10.1026	10.7096	8.96413	8.8451	6.62821	11.2837	0.0365295	3.28829	0.0370794	0.847751	1
CG13018	4.79921	4.11608	3.41629	3.73368	2.67422	6.33834	2.56118	3.35504	3.64551	2.93377	-0.00981208	2.20517	0.00125714	0.993874	1
CG13021	0	0	0	0.248912	0	0	0.182941	0	0	0	0.166227	-1.19947	0.0128448	0.915156	1
CG13022	5.19914	1.68385	4.55506	2.24021	3.56563	2.18563	3.11	3.05003	1.98846	2.03107	0.383303	2.19113	1.61664	0.2849	0.910145
CG13023	0.799868	0.748378	0	1.49347	0.891408	1.09282	1.09765	1.52502	0.662821	0.902699	-0.354778	0.262667	0.45334	0.502534	1
CG13024	6.79888	7.10959	6.07341	6.72063	7.4284	6.77546	5.85412	6.10007	6.62821	4.06214	0.226567	2.98261	1.3681	0.245326	0.886663
CG13025	10.3983	10.4773	11.0081	10.9521	13.6683	11.3653	11.8912	13.1152	9.6109	8.80131	0.0432701	3.4409	0.0492659	0.824865	1
CG13026	8.39862	3.74189	5.31423	10.2054	2.97136	10.0539	6.58589	10.9801	7.95385	9.02699	-0.551331	2.83306	3.17007	0.0784833	0.742696
CG13028	0	0	0	0	0	0	0	0.305003	0	0	-1.56227	-1.21293	1.49553	0.265234	0.886663
CG13029	0	0	0	0	0	0	0	0	0	0	0	-1.16892	0	1	1
CG13031	0.399934	0	0	0	0	0.218563	0	0	0	0	0.187769	-1.15352	0.0171109	0.915156	1
CG13032	0.399934	0.187095	0.379588	0.746737	0.297136	0.218563	0.365883	0.305003	0.994231	0.225675	0.00214045	-0.666681	1.37927e-05	0.997046	1
CG13033	0.399934	0.187095	0	0.248912	0	0.218563	0	0	0.662821	0	0.133528	-1.1124	0.0160416	0.899643	1
CG13038	0.799868	0.374189	0	0	0	0.218563	0	0	0	0	1.76825	-0.731458	2.19143	0.142749	0.867959
CG13039	0	0	0	0	0	0	0	0	0	0	0	-1.30545	0	1	1
CG1304	0	0	0	0	0	0	0	0	0	0	0	-1.13041	0	1	1
CG13040	0	0	0	0	0	0	0	0	0	0	0	-1.24777	0	1	1
CG13041	0	0	0	0	0	0.437127	0	0	0	0	-2.25547	-0.824135	2.31827	0.131847	0.84675
CG13042	0	0.187095	0	0	0.594272	0.218563	0	0	0.33141	0	0.638976	-0.57349	0.319876	0.573135	1
CG13043	0.399934	0.561284	0.379588	0.497824	0.297136	0.218563	0.182941	0	0.662821	0.225675	0.800606	0.651828	0.754031	0.387587	1
CG13044	0	0.374189	0	0.248912	0	0.437127	0	0.305003	0	0	0.133968	0.296861	0.0100708	0.920305	1
CG13045	0	0	0	0	0	0	0	0	0	0	0	-1.22163	0	1	1
CG13046	3.19947	1.87095	3.0367	1.9913	2.97136	2.4042	2.74412	1.83002	1.65705	1.8054	0.257765	1.21909	0.51831	0.545424	1
CG13047	0.399934	0.187095	0	0.248912	0	0.218563	0	0	0	0	1.39641	-0.913246	1.40408	0.241697	0.886663
CG13048	0	0	0	0	0	0	0	0	0	0	0	-1.27753	0	1	1
CG13049	0	0	0	0	0	0	0	0	0	0	0	-0.996379	0	1	1
CG13050	0	0	0	0	0	0	0	0	0	0	0	-1.29936	0	1	1
CG13051	0.399934	0.561284	0	0.497824	0.297136	0	1.28059	0.610007	0.33141	0.451349	-0.527574	-0.249509	0.524123	0.471026	1
CG13053	0.399934	0.187095	0	0.248912	0	0.218563	0	0	0	0	1.39642	-0.918142	1.16413	0.28373	0.909251
CG13054	1.1998	2.80642	0.759176	1.9913	1.48568	1.74851	2.37824	2.13502	2.98269	1.57972	-0.277021	1.39639	0.697501	0.550911	1
CG13055	6.79888	7.10959	6.07341	8.2141	6.23986	4.58983	6.22001	5.49006	5.63397	5.64187	0.327073	2.57197	2.24609	0.137565	0.859244
CG13056	1.1998	1.30966	1.13876	0.746737	0.594272	0.65569	1.09765	0	0.662821	0.677024	0.597103	0.0565903	1.04354	0.309827	0.940046
CG13058	0.399934	0.187095	0	0	0.297136	0.437127	0.182941	0	0	0	0.22816	-1.05371	0.0490601	0.8536	1
CG13059	0	0.187095	0	0	0.297136	0.218563	0	0	0.33141	0	0.130025	-0.93312	0.0140985	0.905784	1
CG13060	0	0.187095	0	0	0	0	0	0	0	0	1.64741	-1.18113	2.00169	0.214216	0.886663
CG13062	1.1998	0.374189	0.379588	0.497824	0.594272	0	0.365883	0.305003	0	0.451349	1.19936	-0.196052	2.15071	0.146103	0.876877
CG13063	0	0	0	0	0	0	0	0	0	0	0	-1.21183	0	1	1
CG13064	0	0	0	0	0	0	0	0	0	0	0	-1.25512	0	1	1
CG13065	0	0.187095	0	0	0	0	0	0.305003	0	0	0.0868116	-1.00364	0.00645657	0.93617	1
CG13066	0	0	0	0	0	0	0	0	0	0	0	-1.21547	0	1	1
CG13067	19.1968	16.8385	16.3223	18.9173	15.7482	21.8563	14.2694	22.2653	21.5417	24.5985	-0.259001	3.99454	1.9145	0.169997	0.886663
CG13068	0.399934	0.187095	0.379588	0.497824	0.594272	0.218563	0.731765	0.305003	0.33141	0.451349	-0.0804871	-0.346767	0.0137412	0.906953	1
CG13069	0.399934	0.187095	1.13876	1.24456	0.594272	1.09282	0.914707	0	1.32564	1.12837	-0.370502	-0.235619	0.319822	0.573167	1
CG1307	33.1945	26.7545	26.5712	22.651	22.8795	30.1617	36.5883	24.7053	25.5186	36.108	-0.231272	4.88922	3.19723	0.0772375	0.742696
CG13070	0	0	0	0	0	0	0	0	0	0	0	-1.26296	0	1	1
CG13071	15.9974	12.7224	13.2856	9.95649	8.02267	10.9282	12.44	9.45511	12.925	14.6689	-0.0280473	3.35607	0.0193554	0.889673	1
CG13073	0	0.187095	0.379588	0.248912	0	0	0.182941	0	0	0	1.40958	-0.613091	1.30081	0.257189	0.886663
CG13074	0	0.374189	0.759176	0.746737	0.594272	0.218563	0.365883	0	0.33141	0.225675	1.00817	-0.562265	1.50939	0.222538	0.886663
CG13075	0	0.187095	0	0.248912	0.297136	0	0.182941	0.305003	0.33141	0	0.136824	-0.741611	0.0199625	0.887968	1
CG13077	41.1932	39.477	36.4405	39.3281	37.4391	30.1617	34.21	32.3304	35.7923	32.9485	0.230395	5.35061	3.25731	0.0745588	0.742696
CG13078	0	0	0	0	0	0	0	0.305003	0	0	-1.56218	-1.19265	1.16533	0.286965	0.913427
CG13081	0	0	0	0	0	0.218563	0	0	0.33141	0.225675	-2.76595	-0.998734	5.56539	0.0536455	0.678766
CG13082	5.59908	4.67736	1.51835	3.9826	3.86277	2.18563	2.56118	5.18506	3.3141	3.38512	0.287207	2.22543	0.794153	0.3753	1
CG13083	0	0	0	0	0.297136	0	0	0	0.662821	0	-0.605974	0.61937	0.138362	0.711339	1
CG13084	0.399934	0.187095	0	0	0	0	0	0	0.33141	0	0.883695	0.420458	0.376042	0.54158	1
CG13085	0.399934	0.748378	0.759176	0.497824	0.594272	1.52994	0.914707	0.610007	0.994231	1.35405	-0.820344	0.464311	2.83847	0.0995944	0.794807
CG13086	2.3996	5.05155	4.93464	3.9826	5.05131	15.9551	5.3053	2.74503	7.95385	6.77024	-0.842522	2.25365	4.37004	0.0394881	0.615856
CG13088	3.59941	4.86446	4.55506	6.22281	5.64558	2.84132	3.84177	3.66004	3.97692	3.15945	0.530941	2.17693	4.98037	0.0282011	0.55693
CG1309	84.3861	77.6442	75.538	74.1758	80.5239	88.9553	73.5424	84.181	63.2994	73.7956	0.0291258	6.36573	0.103519	0.763144	1
CG13090	9.19848	6.9225	9.86929	8.2141	5.94272	11.1467	6.40295	7.32008	8.61667	6.31889	-0.00389664	3.19044	0.000483039	0.982516	1
CG13091	0.399934	0.187095	0	0	0.297136	0	0	0	0.662821	0	0.621387	-1.13883	0.307956	0.58078	1
CG13096	6.79888	12.5353	12.1468	6.22281	5.64558	9.83535	9.14707	8.8451	10.2737	9.02699	-0.10336	3.52015	0.149364	0.700085	1
CG13097	14.7976	13.845	11.0081	7.96519	8.02267	10.2725	13.5377	7.93009	8.94808	15.7972	-0.0473558	3.64396	0.0363184	0.849303	1
CG13101	8.39862	10.4773	10.2489	13.4413	13.6683	12.2395	10.7935	11.5901	10.9365	8.80131	0.0616245	3.27198	0.0707167	0.790924	1
CG13102	0	0	0	0	0.297136	0	0	0	0	0	1.69643	-0.893564	1.76157	0.214216	0.886663
CG13108	15.9974	10.2902	11.0081	11.45	11.2912	7.43116	15.733	13.1152	12.5936	10.8324	-0.00954096	3.94586	0.00203179	0.96415	1
CG1311	34.3943	36.8576	31.5058	35.3455	37.142	42.8384	36.4053	44.5305	30.4897	36.785	-0.122103	5.59418	1.0121	0.317185	0.946914
CG13110	0	0	0	0	0	0	0	0	0	0	0	-1.30545	0	1	1
CG13113	0	0	0	0	0	0	0	0	0	0	0	-1.06921	0	1	1
CG13114	0	0.187095	0	0	0	0	0	0.305003	0	0.677024	-1.46414	-0.444282	1.09719	0.29824	0.925883
CG13116	21.1965	22.8255	20.4978	17.4239	15.1539	25.1348	21.0383	23.1803	30.1583	23.4702	-0.332701	4.35128	5.6252	0.0199057	0.47363
CG13117	65.5892	60.2445	47.8281	45.5509	54.9702	52.6738	61.6512	52.7656	60.3167	60.2551	-0.0708782	5.74924	0.457295	0.500681	1
CG13123	3.19947	2.99351	1.89794	3.73368	4.75418	4.80839	2.74412	3.96505	3.97692	2.93377	-0.125865	2.02766	0.215561	0.675542	1
CG13124	404.733	382.047	455.506	382.827	455.509	373.743	384.36	415.72	360.906	397.187	0.106464	8.60158	1.83585	0.178939	0.886663
CG13126	17.1972	10.8515	13.2856	15.4326	13.3711	12.6767	16.4647	15.5552	14.9135	12.8635	-0.0598561	3.68289	0.252332	0.616704	1
CG13127	0	0	0	0	0	0	0	0	0	0	0	-1.30545	0	1	1
CG13131	0	0	0	0	0	0	0	0	0	0	0	-1.28377	0	1	1
CG13133	15.5974	9.35473	15.1835	13.6902	11.8854	16.6108	3.47589	11.8951	13.5878	5.64187	0.366929	2.83977	0.342598	0.559846	1
CG13135	0	0	0	0	0	0	0	0	0	0	0	-1.23722	0	1	1
CG13137	0	0.187095	0	0	0	0.218563	0	0	0	0	0.114586	-1.20792	0.0101209	0.920331	1
CG13138	0	0.187095	0	0	0	0	0	0	0.33141	0.225675	-0.644036	-1.14913	0.278173	0.649853	1
CG1314	0.399934	0	0	0	0	0	0.182941	0	0.33141	0	-0.551091	-1.02484	0.201244	0.655009	1
CG13142	7.19881	7.48378	10.6285	8.46302	9.21122	9.83535	10.2447	9.76011	8.28526	6.54457	-0.0670838	3.14287	0.128159	0.721214	1
CG13144	0	1.30966	1.51835	0.248912	0.297136	1.09282	0.731765	0.305003	0	0.451349	0.318966	1.02906	0.271764	0.603473	1
CG13148	9.99835	5.23865	10.6285	7.21845	3.86277	6.11977	7.68354	7.93009	6.62821	7.44727	-0.000455853	2.91461	6.6881e-06	0.997942	1
CG1315	6.39895	8.23216	6.83258	5.47607	8.02267	16.6108	7.68354	4.88006	7.29103	10.1554	-0.425667	2.82227	1.31113	0.255323	0.886663
CG13151	8.39862	7.29669	7.59176	4.72933	4.1599	5.68265	6.58589	2.44003	7.29103	7.22159	0.109618	2.74104	0.227536	0.656656	1
CG13154	0	0	0	0	0	0	0.182941	0	0	0	-1.51427	-1.02273	1.27552	0.265234	0.886663
CG13155	0	0	0	0	0	0	0	0	0	0	0	-1.21435	0	1	1
CG13157	0	0	0	0	0	0	0	0	0	0	0	-1.30545	0	1	1
CG13159	0	0	0	0	0	0	0	0	0	0	0	-1.11158	0	1	1
CG1316	187.569	184.101	165.121	164.531	142.328	143.815	186.783	164.397	171.339	178.96	-0.00312465	7.44342	0.00174561	0.966769	1
CG13160	0	0	0	0	0	0	0	0	0	0	0	-1.17032	0	1	1
CG13163	11.998	7.10959	7.59176	8.2141	11.2912	9.61679	10.9765	6.40507	7.62244	10.381	-0.00125127	3.11214	6.22757e-05	0.993722	1
CG13168	0.799868	2.24513	1.51835	2.24021	1.18854	1.74851	2.56118	2.13502	2.65128	2.25675	-0.426457	1.40823	1.40959	0.247683	0.886663
CG1317	190.769	196.075	175.749	203.361	212.452	203.701	195.198	204.962	186.253	192.501	-0.00555655	7.71275	0.00580792	0.939427	1
CG13170	0	0	0	0	0	0	0	0	0	0.225675	-1.53587	-1.12944	1.4442	0.265234	0.886663
CG13171	0	0	0	0	0	0	0	0	0	0	0	-1.28406	0	1	1
CG13175	0	0	0	0	0	0	0	0	0	0	0	-1.30545	0	1	1
CG13177	1.1998	0	0.759176	0.248912	0	0.437127	0	1.83002	1.98846	1.8054	-1.60178	0.972399	1.48068	0.226952	0.886663
CG13178	0.399934	0.187095	2.27753	0.746737	3.56563	2.4042	2.1953	2.44003	1.32564	1.12837	-0.473014	0.821126	0.900925	0.345158	0.970654
CG13183	1.59974	0.561284	1.51835	0.497824	0.594272	1.74851	0.182941	1.22001	0.662821	0.451349	0.0734216	0.758494	0.0231549	0.942464	1
CG13185	35.1942	36.1093	47.8281	38.5814	26.148	23.3863	34.5759	20.4352	33.141	34.7539	0.320839	5.11366	3.29662	0.0728609	0.742696
CG13186	0	0	0	0	0	0	0	0	0	0	0	-1.27663	0	1	1
CG13188	3.59941	4.11608	6.07341	7.46737	5.05131	5.46408	7.31765	5.18506	2.65128	6.09322	-0.0556534	3.11898	0.0671975	0.796073	1
CG1319	17.997	26.0061	27.3303	26.1358	22.2852	34.9701	23.2336	23.7903	26.5128	25.5012	-0.156091	4.64228	1.83739	0.178758	0.886663
CG13192	13.1978	15.1547	14.0448	13.6902	14.2625	16.3923	11.8912	15.8602	16.2391	16.9256	-0.124811	3.86303	0.692184	0.42144	1
CG13193	0	0	0	0	0	0	0.182941	0	0	0	-1.51375	-1.17318	1.55864	0.265234	0.886663
CG13196	0	0.187095	0	0	0	0	0	0	0	0	1.64712	-1.22705	1.92276	0.214216	0.886663
CG13197	30.395	25.632	30.7466	35.5944	30.0107	35.4073	38.4177	28.0603	30.4897	30.4661	-0.104899	5.01902	1.16805	0.282782	0.908341
CG13198	0	0	0	0	0	0	0	0.305003	0.33141	0	-2.31653	-1.11478	2.85038	0.115122	0.808604
[truncated: 14,728 more rows]
