# Supplementary material for: Experimentally induced active and quiet sleep engage non-overlapping transcriptional programs in Drosophila
Source: bioRxiv preprint, doi:10.1101/2023.04.03.535331, version 3 (2023-10-15)
Supplement: Figure7-source data 1 [file 535331_file19.xlsx]

## Sheet: Signif optogenetic 10hr
R23E10Gal4 > UASChrimson +ATR vs -ATR (10hours)
Downregulated			Upregulated
Gene Name	Log2Fold Change	qFDR	Gene Name	Log2Fold Change	qFDR
alphaTry	-8.7168	0.0282	pHCl	0.5821	0.0129
Jon65Aiv	-7.5471	0.0398	jim	0.5831	0.004
betaTry	-7.4664	0.0328	elav	0.5834	0.0015
CG12374	-7.1823	0.0217	fne	0.5835	0.0011
Jon25Bii	-6.1222	0.0226	CG42368	0.5841	0.0002
Jon25Bi	-6.0786	0.0467	MsR1	0.5845	0.0301
Cp36	-5.7777	0.0332	NetB	0.5853	0.0002
CG18180	-5.5012	0.0433	heph	0.5862	0.0025
salt	-5.3771	0.0415	PRL-1	0.5903	0.0016
CG14191	-4.6197	0.0024	Scr	0.5905	0.0363
Cyp4g1	-4.619	0.0115	mamo	0.5918	0.0048
CG15531	-4.4281	0.0376	Tsp97E	0.5918	0.0009
Bace	-4.4036	0.0233	Tob	0.5931	0.0155
Mur18B	-4.3806	0.0043	Ugt35a	0.5951	0.0154
scaRNA:PsiU2-35.45	-3.8345	0.0452	RhoGAP100F	0.5956	0.0008
snRNA:U12:73B	-3.603	0.0072	CG9760	0.596	0.0014
Spn77Bb	-3.5985	0.0475	CG32017	0.5978	0.0497
CG33926	-2.8261	0.0168	NfI	0.6014	0.0175
CG3790	-1.6674	0.0003	brat	0.6038	0.0051
CG7509	-1.4335	0	nAChRalpha5	0.6041	0.0011
CG11449	-1.406	0.0082	CG17490	0.6061	0.0022
CG14221	-1.3659	0	para	0.6064	0.002
ImpE1	-1.2673	0.0241	CG14253	0.6066	0.0061
CR43468	-1.2182	0.0455	CG16779	0.6067	0.0007
CG11892	-1.1981	0.0473	CR42549	0.6104	0.0061
CG9394	-1.1171	0	orb2	0.6134	0.0284
CG33332	-1.113	0.0254	Zip102B	0.617	0.0062
CG6999	-1.031	0.0021	ci	0.6193	0.0025
CG31706	-1.0136	0	CG6808	0.621	0.0099
CG9505	-0.9939	0	CG32694	0.6225	0.0015
CG8441	-0.9852	0.0157	CG40006	0.6244	0.0285
CG14141	-0.9539	0	Kif3C	0.6258	0.0268
alrm	-0.9176	0.0001	CG42588	0.6294	0.0001
wun2	-0.8613	0.0007	lap	0.6297	0.0007
CG10581	-0.8481	0.0058	CG32647	0.6298	0.0024
CG9507	-0.8402	0	CG30419	0.63	0.0001
CG34134	-0.8232	0	chinmo	0.6307	0.0016
CG10514	-0.8193	0.0048	CG3812	0.637	0.0048
CG11858	-0.806	0.0098	Obp57b	0.641	0.0192
CG9486	-0.8035	0.0455	nAChRalpha3	0.6429	0.0015
CG12259	-0.7955	0.0245	Dyrk3	0.6452	0.0023
CG1552	-0.7926	0	CG11155	0.6459	0.0055
l(1)G0004	-0.7861	0.0183	PlexB	0.648	0.008
CG8369	-0.7803	0	CR44327	0.6508	0.0307
CG4409	-0.78	0	nAChRalpha1	0.6512	0.005
CG4291	-0.7793	0.0147	CR45533	0.6529	0.0066
Tsp5D	-0.7778	0	Maf1	0.6534	0.004
Dysb	-0.7751	0.012	CG33521	0.6541	0.0144
Taf11	-0.7744	0.0161	mGluR	0.6555	0.0026
e	-0.7647	0.0004	sxc	0.662	0.0011
CG34367	-0.7543	0.0176	shakB	0.6637	0.0002
Irk3	-0.7506	0	Sema-1a	0.6664	0.0006
Blos1	-0.7501	0.0011	Tsp42Ea	0.667	0.0339
Listericin	-0.7475	0.0296	Uhg4	0.668	0.0301
CG6723	-0.7416	0	CG11360	0.668	0.0313
CG11539	-0.7373	0.0296	CG12567	0.6701	0.0026
Arc2	-0.7365	0.048	CG33977	0.6765	0.0421
CG13364	-0.729	0.0152	bol	0.6781	0.0004
Syx8	-0.7186	0.0002	CG40127	0.6805	0.0293
CG5886	-0.7122	0.0281	sm	0.6856	0.0003
CG15666	-0.7092	0.0234	ft	0.6861	0.0188
CG7172	-0.7039	0.0248	PlexA	0.689	0.0016
CG31974	-0.7027	0.0007	CG34356	0.6896	0.0001
CG12926	-0.7005	0.0001	Syp	0.6961	0.001
Obp44a	-0.6998	0.0069	IntS3	0.6971	0.0006
CG15535	-0.6982	0.0257	Lkr	0.701	0.012
CG17202	-0.6977	0.0164	CG10019	0.7028	0.0024
CG12848	-0.6942	0.0008	pho	0.7116	0.0023
Smn	-0.6938	0.0247	Tsp96F	0.7116	0.0007
CG13901	-0.6739	0.0179	CG9935	0.7142	0.0025
CG12014	-0.668	0.0064	CG40467	0.7152	0.0048
wibg	-0.6675	0.0384	Sur	0.7168	0.012
CG10343	-0.6662	0.0098	nrm	0.7205	0
spn-F	-0.6658	0.0026	uex	0.7207	0.0014
CG31223	-0.6614	0.0495	Ephrin	0.7228	0.0032
Nle	-0.6581	0.0152	Parp	0.7257	0.0058
Adgf-D	-0.6557	0.0244	sff	0.7306	0
CG31248	-0.6546	0.0001	p120ctn	0.7324	0.0008
NC2beta	-0.6546	0.0261	CG10268	0.7335	0.002
CG1665	-0.6501	0.0234	Eph	0.7383	0.0003
CG31235	-0.6497	0.0117	yellow-h	0.7384	0.0433
CG2147	-0.6442	0.0433	Adar	0.7399	0.0008
CG10131	-0.6324	0.0487	myo	0.7411	0.0025
CG7988	-0.6294	0.0281	CG41099	0.7417	0.0002
CG3940	-0.6234	0	CG2316	0.7422	0.0008
MrgBP	-0.6212	0.0007	CG34120	0.7429	0.0003
CG30094	-0.6188	0.0424	RunxA	0.7462	0.0058
GstE1	-0.6157	0.0002	Pten	0.7474	0.0015
CG12177	-0.615	0.0011	RhoGAP102A	0.7477	0.002
betaTub97EF	-0.6148	0	orb	0.7555	0.0017
CG8490	-0.6143	0.0362	mei-P26	0.7601	0.0027
ana	-0.6104	0.0006	nAChRalpha4	0.763	0.0015
RpL31	-0.6023	0.0124	esc	0.764	0.0467
RpL34b	-0.6022	0.0023	Dop1R1	0.7765	0.0007
CG13367	-0.5988	0.0177	sr	0.7792	0.0026
CG1545	-0.5988	0.0047	CG42494	0.7831	0.0402
maf-S	-0.5981	0.0416	Hr38	0.7951	0.0001
CG18619	-0.5962	0.0033	CG13101	0.7991	0.0264
E(spl)mbeta-HLH	-0.594	0.0357	CR44662	0.8247	0.0391
RpS30	-0.5933	0.0034	GluRIID	0.8385	0.0008
DMAP1	-0.5927	0.0035	dysc	0.8442	0
RpL24-like	-0.5903	0.0031	CG32000	0.8467	0.0003
RpS25	-0.5885	0.0213	CG10348	0.8508	0.0174
CG32202	-0.5855	0.0452	Alg-2	0.8515	0.0017
CG17996	-0.5851	0.0146	CG42246	0.8529	0.0237
CG17230	-0.584	0.036	CG43324	0.8548	0.0002
RpL13	-0.58	0.0064	Hr46	0.8664	0.0001
			MFS17	0.868	0.0055
			Tsp26A	0.8697	0.0013
			Uhg3	0.8822	0.012
			CG17883	0.8926	0.0017
			chrb	0.8951	0.0001
			CG4455	0.9087	0.0115
			CR44029	0.9116	0.0131
			Cals	0.9242	0.0007
			CG17514	0.9274	0.0001
			l(2)41Ab	0.9364	0.0017
			CR45409	0.9532	0.0033
			CG11458	0.9601	0.0474
			CR44458	0.9769	0.0206
			Haspin	0.9846	0.0009
			cta	1.0062	0.0002
			MED26	1.0075	0
			CG33978	1.0094	0.0002
			Stlk	1.019	0.002
			CG3107	1.0244	0
			spz3	1.0373	0.0026
			Nipped-B	1.05	0
			mir-281-1	1.053	0.0147
			CG40178	1.0557	0.0002
			CG17724	1.0588	0
			CR44317	1.0642	0.02
			CR44922	1.0652	0.0002
			RpL38	1.077	0
			CG42392	1.0815	0.0025
			Nipped-A	1.0895	0
			Atf6	1.1026	0.0001
			CG17162	1.1109	0.0363
			hdc	1.1184	0.0002
			pncr013:4	1.1246	0.0059
			msi	1.135	0
			CG40472	1.1666	0.0058
			CG11374	1.1697	0.0022
			CR43957	1.176	0.004
			CG40298	1.1842	0.0407
			CR45176	1.2061	0.0298
			CR43148	1.2465	0.0096
			CG43789	1.2564	0.0261
			Pvf2	1.2605	0.0487
			CG41343	1.2735	0.0002
			CR45758	1.2821	0.0028
			Lasp	1.2917	0.0002
			Cpr64Ac	1.2944	0.0134
			CR45014	1.3195	0.0281
			CG40198	1.3359	0.0089
			Uhg1	1.3683	0.0001
			CG14304	1.4294	0.0025
			CG43788	1.4641	0.0003
			CG44195	1.4826	0.0035
			CG33217	1.5342	0.003
			CG33199	1.6676	0.0139
			CG17931	1.8274	0.0025
			CR45333	2.2092	0.0401
			CR43956	2.4091	0.0074
			CG41056	2.9036	0.0096
			CR45273	3.0476	0.0424
			CG41281	3.9344	0.0406
			mir-283	4.0194	0.0301
			CR43256	4.2615	0.0111
			CR45662	4.2768	0.0151
			scaRNA:PsiU5-44	4.3145	0.0311

## Sheet: All genes
Row.names	dm15_1	dm15_2	dm15_3	dm15_4	dm15_5	dm16_1	dm16_2	dm16_3	dm16_4	dm16_5	logFC	logCPM	F	PValue	FDR
128up	18.5941	22.8146	22.1545	22.4595	22.1608	26.0345	26.7594	25.7779	21.96	21.4385	-0.174432	4.49957	2.0709	0.153714	0.511361
140up	13.354	13.6087	10.4502	12.7548	15.0816	14.5793	16.0991	16.0095	13.4343	17.71	-0.262493	3.85757	4.18607	0.0437709	0.250824
14-3-3epsilon	561.543	573.368	564.521	554.554	573.41	485.023	588.706	576.883	480.536	546.028	0.0786546	9.19045	0.890538	0.34794	0.740815
14-3-3zeta	1685.81	1754.33	1572.55	1647.58	1568.49	1304.33	1794.62	1575.44	1307.26	1517.1	0.134002	10.6062	3.2551	0.0746554	0.342408
18w	43.7807	34.222	53.0871	41.037	35.0879	50.7673	24.8014	42.8728	49.087	30.5731	0.0758064	5.44024	0.329507	0.567428	0.97158
26-29-p	77.9263	78.4503	91.753	87.6196	87.7197	85.9138	92.0261	74.6204	82.4145	90.9736	-0.0109243	6.83069	0.00561773	0.940425	1
2mit	160.248	165.306	150.692	171.912	141.583	133.297	90.7208	126.99	144.161	145.782	0.301655	7.24247	11.5062	0.00104478	0.0226051
312	13.354	11.8076	15.0483	17.1912	13.5427	16.9224	20.4502	16.8235	13.951	14.168	-0.219207	3.92417	3.09711	0.0819391	0.362496
4EHP	178.504	186.92	163.442	173.853	174.824	116.374	118.35	170.134	129.693	152.866	0.352399	7.43629	12.2192	0.000746152	0.0179185
4E-T	139.287	143.492	135.644	143.907	117.575	86.1742	93.3314	95.5141	124.009	102.159	0.440841	6.98591	17.0935	8.1599e-05	0.00403819
5.8SrRNA:CR40454	6.59247	6.20398	3.34407	6.93193	194.83	422.54	8.26712	8.6831	1405.96	6.89759	-3.15867	5.96192	6.1955	0.0147071	0.128061
5-HT1A	65.2485	63.4407	64.1644	61.8328	68.0212	62.2224	33.7211	62.1384	62.7797	63.3833	0.184387	6.06899	4.01756	0.0481324	0.2614
5-HT1B	37.8644	43.2277	38.6658	45.4735	36.319	32.5431	27.1945	35.2751	30.2273	28.7089	0.391281	5.22628	13.2223	0.000467495	0.0134439
5-HT2A	137.597	139.089	127.493	136.143	106.495	129.131	98.9879	104.197	135.377	125.834	0.125592	6.94023	1.80558	0.182527	0.570784
5-HT2B	33.9766	33.0212	29.8876	25.2322	29.5477	24.9931	18.9274	30.9335	33.0692	27.7768	0.168667	4.83607	1.86114	0.176005	0.557583
5-HT7	37.0192	36.2232	31.5597	33.2733	37.5502	25.2535	22.4082	30.1195	27.3854	31.6916	0.358547	4.86802	11.9052	0.000865011	0.0197664
5PtaseI	82.6594	87.256	84.0198	84.2923	77.2549	70.5535	93.549	90.0871	93.5237	81.6526	-0.0465969	6.45989	0.475095	0.492483	0.907043
5SrRNA:CR33353	0	0	0	0	0	0	0	0	0	0	0	-1.30545	0	1	1
5SrRNA:CR33354	0	0	0	0	0	0	0	0	0	0	0	-1.30545	0	1	1
5SrRNA:CR33355	0	0	0	0	0	0	0	0	0	0	0	-1.30545	0	1	1
5SrRNA:CR33357	0	0	0	0	0	0	0	0	0	0	0	-1.30545	0	1	1
5SrRNA:CR33358	0	0	0	0	0	0	0	0	0	0	0	-1.30545	0	1	1
5SrRNA:CR33359	0	0	0	0	0	0	0	0	0	0	0	-1.30545	0	1	1
5SrRNA:CR33360	0	0	0	0	0	0	0	0	0	0	0	-1.30545	0	1	1
5SrRNA:CR33361	0	0	0	0	0	0	0	0	0	0	0	-1.30545	0	1	1
5SrRNA:CR33362	0	0	0	0	0	0	0	0	0	0	0	-1.30545	0	1	1
5SrRNA:CR33364	0	0	0	0	0	0	0	0	0	0	0	-1.30545	0	1	1
5SrRNA:CR33365	0	0	0	0	0	0	0	0	0	0	0	-1.30545	0	1	1
5SrRNA:CR33366	0	0	0	0	0	0	0	0	0	0	0	-1.30545	0	1	1
5SrRNA:CR33367	0	0	0	0.277277	0	1.04138	0	0	1.03341	0	-2.55727	-1.06526	4.62897	0.0358298	0.223129
5SrRNA:CR33368	0	0	0	0	0	0	0	0	0	0	0	-1.30545	0	1	1
5SrRNA:CR33369	0	0	0	0	0	0	0	0	0	0	0	-1.30545	0	1	1
5SrRNA:CR33370	0	0	0	0	0	0	0	0	0	0	0	-1.30545	0	1	1
5SrRNA:CR33372	0	0	0	0	0	0	0	0	0	0	0	-1.30545	0	1	1
5SrRNA:CR33373	0	0	0	0	0	0	0	0	0	0	0	-1.30545	0	1	1
5SrRNA:CR33374	0	0	0	0	0	0	0	0	0	0	0	-1.30545	0	1	1
5SrRNA:CR33375	0	0	0	0	0	0	0	0	0	0	0	-1.30545	0	1	1
5SrRNA:CR33376	0	0	0	0	0	0	0	0	0	0	0	-1.30545	0	1	1
5SrRNA:CR33377	0	0	0	0	0	0	0	0	0	0	0	-1.30545	0	1	1
5SrRNA:CR33378	0	0	0	0	0	0	0	0	0	0	0	-1.30545	0	1	1
5SrRNA:CR33379	0	0	0	0	0	0	0	0	0	0	0	-1.30545	0	1	1
5SrRNA:CR33380	0	0	0	0	0	0	0	0	0	0	0	-1.30545	0	1	1
5SrRNA:CR33381	0	0	0	0	0	0	0	0	0	0	0	-1.30545	0	1	1
5SrRNA:CR33382	0	0	0	0	0	0	0	0	0	0	0	-1.30545	0	1	1
5SrRNA:CR33383	0	0	0	0	0	0	0	0	0	0	0	-1.30545	0	1	1
5SrRNA:CR33384	0	0	0	0	0	0	0	0	0	0	0	-1.30545	0	1	1
5SrRNA:CR33385	0	0	0	0	0	0	0	0	0	0	0	-1.30545	0	1	1
5SrRNA:CR33386	0	0	0	0	0	0	0	0	0	0	0	-1.30545	0	1	1
5SrRNA:CR33387	0	0	0	0	0	0	0	0	0	0	0	-1.30545	0	1	1
5SrRNA:CR33388	0	0	0	0	0	0	0	0	0	0	0	-1.30545	0	1	1
5SrRNA:CR33389	0	0	0	0	0	0	0	0	0	0	0	-1.30545	0	1	1
5SrRNA:CR33390	0	0	0	0	0	0	0	0	0	0	0	-1.30545	0	1	1
5SrRNA:CR33391	0	0	0	0	0	0	0	0	0	0	0	-1.30545	0	1	1
5SrRNA:CR33392	0	0	0	0	0	0	0	0	0	0	0	-1.30545	0	1	1
5SrRNA:CR33393	0	0	0	0	0	0	0	0	0	0	0	-1.30545	0	1	1
5SrRNA:CR33394	0	0	0	0	0	0	0	0	0	0	0	-1.30545	0	1	1
5SrRNA:CR33395	0	0	0	0	0	0	0	0	0	0	0	-1.30545	0	1	1
5SrRNA:CR33396	0	0	0	0	0	0	0	0	0	0	0	-1.30545	0	1	1
5SrRNA:CR33397	0	0	0	0	0	0	0	0	0	0	0	-1.30545	0	1	1
5SrRNA:CR33398	0	0	0	0	0	0	0	0	0	0	0	-1.30545	0	1	1
5SrRNA:CR33399	0	0	0	0	0	0	0	0	0	0	0	-1.30545	0	1	1
5SrRNA:CR33400	0	0	0	0	0	0	0	0	0	0	0	-1.30545	0	1	1
5SrRNA:CR33401	0	0	0	0	0	0	0	0	0	0	0	-1.30545	0	1	1
5SrRNA:CR33402	0	0	0	0	0	0	0	0	0	0	0	-1.30545	0	1	1
5SrRNA:CR33403	0	0	0	0	0	0	0	0	0	0	0	-1.30545	0	1	1
5SrRNA:CR33404	0	0	0	0	0	0	0	0	0	0	0	-1.30545	0	1	1
5SrRNA:CR33405	0	0	0	0	0	0	0	0	0	0	0	-1.30545	0	1	1
5SrRNA:CR33406	0	0	0	0	0	0	0	0	0	0	0	-1.30545	0	1	1
5SrRNA:CR33407	0	0	0	0	0	0	0	0	0	0	0	-1.30545	0	1	1
5SrRNA:CR33408	0	0	0	0	0	0	0	0	0	0	0	-1.30545	0	1	1
5SrRNA:CR33409	0	0	0	0	0	0	0	0	0	0	0	-1.30545	0	1	1
5SrRNA:CR33410	0	0	0	0	0	0	0	0	0	0	0	-1.30545	0	1	1
5SrRNA:CR33411	0	0	0	0	0	0	0	0	0	0	0	-1.30545	0	1	1
5SrRNA:CR33412	0	0	0	0	0	0	0	0	0	0	0	-1.30545	0	1	1
5SrRNA:CR33413	0	0	0	0	0	0	0	0	0	0	0	-1.30545	0	1	1
5SrRNA:CR33414	0	0	0	0	0	0	0	0	0	0	0	-1.30545	0	1	1
5SrRNA:CR33415	0	0	0	0	0	0	0	0	0	0	0	-1.30545	0	1	1
5SrRNA:CR33417	0	0	0	0	0	0	0	0	0	0	0	-1.30545	0	1	1
5SrRNA:CR33418	0	0	0	0	0	0	0	0	0	0	0	-1.30545	0	1	1
5SrRNA:CR33419	0	0	0	0	0	0	0	0	0	0	0	-1.30545	0	1	1
5SrRNA:CR33420	0	0	0	0	0	0	0	0	0	0	0	-1.30545	0	1	1
5SrRNA:CR33421	0	0	0	0	0	0	0	0	0	0	0	-1.30545	0	1	1
5SrRNA:CR33422	0	0	0	0	0	0	0	0	0	0	0	-1.30545	0	1	1
5SrRNA:CR33423	0	0	0	0	0	0	0	0	0	0	0	-1.30545	0	1	1
5SrRNA:CR33424	0	0	0	0	0	0	0	0	0	0	0	-1.30545	0	1	1
5SrRNA:CR33425	0	0	0	0	0	0	0	0	0	0	0	-1.30545	0	1	1
5SrRNA:CR33426	0	0	0	0	0	0	0	0	0	0	0	-1.30545	0	1	1
5SrRNA:CR33427	0	0	0	0	0	0	0	0	0	0	0	-1.30545	0	1	1
5SrRNA:CR33428	0	0	0	0	0	0	0	0	0.258353	0	-1.52242	-1.21544	1.67016	0.229901	0.613612
5SrRNA:CR33429	0	0	0	0	0	0	0	0	0	0	0	-1.30545	0	1	1
5SrRNA:CR33430	0	0	0	0	0	0	0	0	0	0	0	-1.30545	0	1	1
5SrRNA:CR33431	0	0	0	0	0	0	0	0	0	0	0	-1.30545	0	1	1
5SrRNA:CR33432	0	0	0	0	0	0	0	0	0	0	0	-1.30545	0	1	1
5SrRNA:CR33433	0	0	0	0	0	0	0	0	0	0	0	-1.30545	0	1	1
5SrRNA:CR33434	0	0	0	0	0	0	0	0	0	0	0	-1.30545	0	1	1
5SrRNA:CR33435	0	0	0	0	0	0	0	0	0	0	0	-1.30545	0	1	1
5SrRNA:CR33436	0	0	0	0	0	0	0	0	0	0	0	-1.30545	0	1	1
5SrRNA:CR33437	0	0	0	0	0	0	0	0	0	0	0	-1.30545	0	1	1
5SrRNA:CR33438	0	0	0	0	0	0	0	0	0	0	0	-1.30545	0	1	1
5SrRNA:CR33439	0	0	0	0	0	0	0	0	0	0	0	-1.30545	0	1	1
5SrRNA:CR33440	0	0	0	0	0	0	0	0	0	0	0	-1.30545	0	1	1
5SrRNA:CR33441	0	0	0	0	0	0	0	0	0	0	0	-1.30545	0	1	1
5SrRNA:CR33442	0	0	0	0	0	0	0	0	0	0	0	-1.30545	0	1	1
5SrRNA:CR33443	0	0	0	0	0	0	0	0	0	0	0	-1.30545	0	1	1
5SrRNA:CR33444	0	0	0	0	0	0	0	0	0	0	0	-1.30545	0	1	1
5SrRNA:CR33445	0	0	0	0	0	0	0	0	0	0	0	-1.30545	0	1	1
5SrRNA:CR33446	0	0	0	0	0	0	0	0	0	0	0	-1.30545	0	1	1
5SrRNA:CR33447	0	0	0	0	0	0	0	0	0	0	0	-1.30545	0	1	1
5SrRNA:CR33448	0	0	0	0	0	0	0	0	0	0	0	-1.30545	0	1	1
5SrRNA:CR33449	0	0	0	0	0	0	0	0	0	0	0	-1.30545	0	1	1
5SrRNA:CR33450	0	0	0	0	0	0	0	0	0	0	0	-1.30545	0	1	1
5SrRNA:CR33451	0	0	0	0	0	0	0	0	0	0	0	-1.30545	0	1	1
5SrRNA:CR33452	0	0	0	0	0	0	0	0	0	0	0	-1.29802	0	1	1
5SrRNA-Psi:CR33356	0	0	0	0	0	0	0	0	0	0	0	-1.30545	0	1	1
5SrRNA-Psi:CR33363	0	0	0	0	0.307788	1.04138	0	0	1.03341	0	-2.54941	-0.868537	3.53149	0.0640894	0.310641
5SrRNA-Psi:CR33371	0	0	0	0	0	0	0	0	0	0	0	-1.30545	0	1	1
5SrRNA-Psi:CR33416	0	0	0	0	0	0	0	0	0	0	0	-1.30545	0	1	1
7B2	415.664	441.083	425.533	459.726	499.54	499.602	588.271	505.248	450.051	525.149	-0.196912	8.70109	6.11525	0.0153427	0.131366
7SLRNA:CR32864	0	0	0	0	0	0	0	0	0	0	0	-1.30545	0	1	1
7SLRNA:CR42652	0	0	0	0	0	0	0	0	0	0	0	-1.30545	0	1	1
825-Oak	0	0.200128	0	0	0	0	0	0	0	0	1.45514	-1.27624	1.6757	0.248344	0.613612
a	33.6385	35.2226	38.0388	37.7097	37.858	38.0104	28.9349	41.7874	36.9444	37.2843	-0.00401882	5.16355	0.00166627	0.967533	1
a10	0.169038	0.400257	1.04502	1.10911	0.615577	0	0.217556	0.542694	0	0.186421	1.61414	4.14282	0.132606	0.716627	1
A16	13.692	14.2091	14.0033	17.4685	15.0816	20.5672	24.1487	21.1651	21.1849	20.3199	-0.534338	4.08445	8.10152	0.00551321	0.0673135
A2bp1	270.967	284.983	233.667	295.3	280.087	196.56	156.423	222.776	226.834	228.18	0.404965	8.08675	9.17188	0.0032326	0.0471419
a5	0	0.200128	0	0.554554	0	0.260345	0	0	0	0	1.1404	2.31086	0.0549242	0.815282	1
a6	21.1297	15.4099	17.1384	14.4184	19.0829	18.4845	19.1449	22.5218	20.4099	20.8792	-0.214164	4.12068	3.25269	0.0747608	0.342609
Aac11	296.323	309.799	288.008	320.532	370.577	312.414	301.75	319.647	292.197	300.698	0.0536178	8.32881	0.624983	0.431347	0.839165
Aatf	8.11381	5.80372	8.56918	8.04104	13.2349	10.9345	9.57246	11.9393	9.3007	11.931	-0.318153	3.48866	2.25139	0.137108	0.476204
Aats-ala	75.8979	72.2464	84.4378	64.8829	75.1003	66.9086	59.6103	62.6811	70.272	68.7895	0.183708	5.90138	3.78737	0.0548618	0.282535
Aats-ala-m	25.3556	22.0141	25.7076	23.014	23.3919	22.9103	23.2785	23.8785	21.96	25.9126	0.0186346	4.61228	0.0337182	0.854734	1
Aats-arg	21.8059	22.6145	22.1545	17.4685	19.6984	23.1707	21.7556	20.6224	22.9934	20.8792	-0.0700747	4.53628	0.372563	0.588152	0.986409
Aats-asn	93.4778	90.2579	97.3961	95.9379	104.956	147.616	131.186	120.207	126.335	133.851	-0.452795	6.68002	15.79	0.00014544	0.00603665
Aats-asp	53.0778	48.8313	54.5502	50.1872	42.7826	58.5776	56.347	49.6565	67.1717	54.0622	-0.192851	5.76218	3.5145	0.0641826	0.31079
Aats-cys	31.7791	24.0154	31.5597	25.7868	28.0087	28.3776	27.1945	23.0645	28.4188	31.5052	0.0264352	4.79195	0.0620461	0.803877	1
Aats-gln	26.7079	20.8134	28.8426	25.5095	32.01	35.4069	31.5456	31.7476	27.6437	30.7595	-0.235063	4.91984	2.57812	0.111967	0.421062
Aats-glupro	137.259	131.084	134.39	128.934	125.27	119.498	75.0568	93.072	119.101	111.48	0.343302	6.55566	15.2164	0.000188137	0.00711985
Aats-gly	33.3004	37.8243	33.8587	37.987	42.167	42.4362	37.4196	30.3908	45.7284	41.572	-0.0988943	5.2344	0.766892	0.383587	0.784359
Aats-his	75.8979	77.4497	76.0776	82.9059	69.2524	77.3224	73.0988	74.8917	79.831	77.3649	-0.00297487	6.20688	0.0012174	0.995121	1
Aats-ile	225.327	209.534	213.603	211.84	162.512	153.083	162.079	165.25	181.364	146.714	0.340933	7.46732	17.9277	5.66437e-05	0.00316882
Aats-leu	28.7364	26.417	22.7815	28.8368	29.8555	32.8035	23.496	31.2049	31.7774	31.3188	-0.141554	4.80907	2.1954	0.142029	0.486871
Aats-lys	178.335	180.916	180.162	194.649	150.508	275.445	219.949	220.605	234.843	221.469	-0.405412	7.85531	11.5886	0.00100471	0.022142
Aats-met	8.28284	10.0064	10.2412	11.3684	8.00249	8.07069	8.91979	9.22579	8.52564	10.4396	0.0778005	3.32866	0.21412	0.662132	1
Aats-phe	42.9356	55.6357	45.145	49.3553	50.7851	55.4535	59.3927	54.5407	50.6371	55.1807	-0.176618	5.58631	4.76236	0.0317781	0.206428
Aats-pro	7.09958	8.80565	10.4502	11.9229	10.4648	11.1948	10.8778	14.3814	10.5925	10.4396	-0.24773	3.24011	2.7197	0.102716	0.400021
Aats-ser	17.2418	18.4118	21.3185	21.6276	18.4673	22.1293	24.1487	18.7229	18.8598	18.2693	-0.0760578	4.14288	0.450327	0.503954	0.918234
Aats-thr	122.214	132.285	130.001	138.084	129.579	143.971	123.354	129.432	140.802	152.493	-0.0822921	7.0199	0.810595	0.370425	0.768556
Aats-trp	32.6243	33.2213	32.3957	32.1642	32.3178	29.6793	34.8089	27.406	35.911	36.5386	-0.0169485	4.88986	0.025597	0.873259	1
Aats-tyr	41.4142	46.6299	47.862	54.3463	56.3253	53.1104	58.0874	56.1688	56.8376	50.3338	-0.159583	5.75944	2.40569	0.124518	0.44956
Aats-tyr-m	11.3255	12.6081	12.1223	11.0911	12.0037	14.5793	14.5762	15.7381	14.7261	14.5409	-0.323971	3.8417	4.59862	0.0347805	0.218548
Aats-val	78.2644	76.4491	71.0615	79.024	68.0212	96.3276	62.4385	80.59	84.9981	83.7032	-0.128267	6.21767	1.6253	0.205741	0.611485
aay	125.257	127.082	165.532	131.152	144.045	99.7121	183.617	124.277	111.35	116.7	0.123181	7.34883	0.641888	0.425206	0.831765
ab	62.3749	54.4349	61.2383	55.7327	60.0187	51.2879	38.7249	53.4553	54.5124	58.5363	0.196268	5.66372	4.38532	0.0391531	0.233731
ABCB7	71.1648	63.841	73.1516	68.7648	81.2561	85.3931	76.5796	83.8462	79.5727	91.7193	-0.221857	6.25171	8.50036	0.00451282	0.0591694
abd-A	0.169038	0	0	0.277277	0	0	0	0	0	0	2.1711	-0.907285	2.15	0.148688	0.500174
Abd-B	0.169038	0	0	0	0	0	0	0	0	0	1.43795	-0.982545	1.15341	0.28751	0.667201
Abi	57.4728	58.4375	59.3573	67.9329	60.3265	49.9862	48.9501	56.9828	56.5793	50.893	0.204051	5.77172	6.29066	0.0139891	0.123873
Abl	186.11	186.119	177.027	186.053	185.289	190.572	100.293	198.355	196.09	204.318	0.0498753	7.48554	0.344652	0.558674	0.962939
abo	10.3113	10.0064	11.0772	12.4775	8.92586	8.85173	12.8358	12.2106	12.4009	10.9989	-0.11805	3.41129	0.593469	0.443164	0.853419
Abp1	38.5406	48.4311	42.0099	38.5415	51.0929	50.7673	47.2096	48.8424	46.2451	46.9782	-0.136836	5.48132	1.66227	0.200708	0.601874
abs	21.8059	22.0141	21.7365	21.3503	22.4685	28.1172	19.7976	25.5066	26.352	25.7262	-0.19653	4.50635	3.24942	0.0749047	0.343081
ac	0	0	0	0	0	0	0	0	0	0	0	-1.28411	0	1	1
Ac13E	119.51	103.066	117.043	110.911	84.0262	93.7242	51.9958	91.7152	111.608	93.0243	0.278053	6.94107	6.61196	0.0118246	0.11044
Ac3	323.707	328.611	303.057	316.928	301.325	225.979	202.327	267.819	258.869	258.194	0.375612	8.03186	18.6114	4.21102e-05	0.00258971
Ac76E	131.68	122.679	121.223	122.279	110.188	117.936	73.7514	109.624	103.599	113.158	0.232771	6.85816	5.9147	0.0170605	0.13982
Ac78C	41.4142	37.2239	37.6208	33.8278	37.2424	38.7914	19.1449	38.2599	41.8531	34.488	0.126023	5.22541	1.45057	0.231697	0.613612
Acam	0	0	0	0	0	0	0	0	0	0	0	-1.30545	0	1	1
ACC	410.423	356.229	612.174	344.656	382.889	380.885	338.517	373.645	434.808	302.935	0.203292	8.90643	1.60578	0.20846	0.613612
AcCoAS	473.136	447.687	555.743	482.462	458.912	459.248	488.848	489.781	450.051	469.409	0.0366873	9.16212	0.134021	0.715185	1
Ace	523.848	565.163	503.701	544.295	451.833	368.648	283.693	444.466	403.805	425.227	0.427176	8.88857	15.5595	0.000161256	0.00640697
Acer	48.3448	38.6248	91.962	34.9369	45.2449	57.5362	74.4041	49.6565	39.2696	31.8781	0.0430102	6.12843	0.0302732	0.862275	1
Acf1	41.7523	45.229	48.28	56.5646	43.7059	48.1638	33.5036	51.8272	50.3788	53.1301	-0.0104773	5.60763	0.0054836	0.941139	1
achi	14.1992	15.4099	14.0033	17.7457	16.005	12.2362	16.5342	10.0398	14.2094	13.9816	0.195248	3.75878	1.88787	0.172965	0.550559
acj6	29.2435	28.6184	25.0805	27.4504	22.7763	26.2948	18.2747	31.2049	22.9934	29.4546	0.0599975	4.6953	0.254331	0.615314	0.99884
Ack	158.557	162.504	146.721	170.803	155.433	165.319	97.465	148.969	177.747	187.726	0.0306031	7.19358	0.16763	0.683231	1
Ack-like	86.3782	88.857	86.1099	100.929	96.6455	81.7483	55.9118	98.2275	93.5237	95.2613	0.111012	6.48884	1.90644	0.170889	0.546239
Acn	217.044	225.545	231.368	232.636	308.404	305.645	220.166	315.576	278.504	313.374	-0.239528	8.02257	2.73515	0.101759	0.399724
Acon	1417.21	1446.33	1211.39	1404.13	1351.5	1366.29	1268.13	1196.64	1317.6	1397.6	0.0613021	10.3481	0.488231	0.486578	0.90043
Acox57D-d	5.57824	3.20205	9.1962	4.71371	3.69346	4.68621	7.17934	4.88424	3.87529	4.28769	0.096456	3.01144	0.129491	0.71983	1
Acox57D-p	16.2276	12.8082	21.5275	14.973	10.4648	13.2776	17.4045	17.6375	13.951	9.88033	0.0945282	4.5567	0.276491	0.600345	0.991311
Acp1	13.523	17.0109	39.2928	27.1732	4.00125	7.81035	25.6716	16.0095	5.16706	1.67779	0.862238	5.03699	2.34287	0.129478	0.459826
Acp24A4	0	0	0	0	0	0	0	0	0	0	0	-1.0255	0	1	1
Acp26Aa	0	0	0	0	0	0	0	0	0	0	0	-1.29083	0	1	1
Acp26Ab	0	0	0	0	0	0	0	0	0	0	0	-1.23446	0	1	1
Acp29AB	0	0	0	0	0	0	0	0	0	0	0	-1.30545	0	1	1
Acp32CD	0	0	0	0	0	0	0	0	0	0	0	-1.30545	0	1	1
Acp33A	0	0	0	0	0	0	0	0	0	0	0	-1.29789	0	1	1
Acp36DE	0	0.200128	0	0	0	0	0	0.81404	0	0.186421	-1.63492	-0.929386	1.78341	0.185375	0.574109
Acp53C14a	0	0	0	0	0	0	0	0	0	0	0	-1.19275	0	1	1
Acp53C14b	0.169038	0	0.418009	0.277277	0	0.52069	0	0.542694	0	0.186421	-0.384297	-0.895409	0.146868	0.702524	1
Acp53C14c	0	0.200128	0.418009	0	0	0.52069	0	0.271347	0	0	-0.107455	-0.966979	0.00902602	0.946844	1
Acp53Ea	0.338075	0	0	0	0.307788	0	0	0.271347	0	0	1.10578	-0.984184	0.937161	0.335816	0.726204
Acp54A1	0	0	0	0	0	0	0	0	0	0	0	-1.18854	0	1	1
Acp62F	0	0	0	0	0	0	0	0	0	0.186421	-1.49076	-1.13416	1.30134	0.259727	0.628992
Acp63F	0	0	0	0	0	0	0	0	0	0	0	-1.10316	0	1	1
Acp65Aa	1.52134	2.20141	2.29905	2.21822	0.615577	0.260345	1.08778	1.62808	1.55012	1.49137	0.564661	2.47901	1.48394	0.226445	0.613612
Acp76A	0	0	0	0	0	0	0	0	0	0	0	-1.27716	0	1	1
Acp95EF	0	0	0.209004	0	0	0	0	0	0	0	1.45953	-1.14502	1.24896	0.269931	0.643364
Acp98AB	0	0	0	0	0	0	0	0	0	0	0	-1.29789	0	1	1
Acph-1	19.7774	18.2117	22.9905	17.4685	16.005	11.1948	15.8816	11.1252	14.4678	13.9816	0.503302	4.23042	14.8665	0.000220324	0.00801165
Acsl	335.709	283.782	365.34	277.555	294.553	275.966	282.823	266.734	278.246	237.314	0.216114	8.5732	3.16593	0.0786748	0.353762
Act42A	44.2879	48.231	37.6208	49.3553	40.9358	42.4362	49.3852	44.2295	44.695	39.7078	0.000298973	5.39883	4.39488e-06	0.998332	1
Act57B	2014.93	1974.27	1734.11	2296.69	2042.18	1499.07	1571.41	1407.75	1448.84	1561.84	0.426007	10.9548	5.60551	0.0201165	0.155566
Act5C	907.056	982.03	941.565	980.73	869.194	1036.95	1147.17	986.346	1060.54	1084.6	-0.183568	9.9438	7.43441	0.00773502	0.0836893
Act79B	36.5121	41.2265	31.1417	86.7878	317.637	234.571	291.307	258.051	23.5101	542.859	-1.42301	8.36959	2.6109	0.109745	0.415788
Act87E	189.491	188.121	154.872	221.267	263.159	200.986	267.811	234.715	144.678	255.397	-0.121183	8.18575	0.204436	0.652287	1
Act88F	10.8184	3.20205	10.4502	11.9229	24.0075	9.63276	11.3129	7.32636	6.71717	20.3199	0.0567892	3.61698	0.0120321	0.912907	1
Actbeta	166.502	147.495	147.348	145.848	119.73	107.262	147.068	130.789	120.651	132.918	0.187657	7.20421	2.46103	0.120325	0.441377
Actn	275.869	276.177	251.223	311.937	372.424	308.248	237.788	308.521	275.404	358.861	-0.00263133	8.30717	0.000281227	0.986659	1
Actn3	0	0	0	0	0	0.260345	0	0	0	0	-1.52317	-1.25495	1.62247	0.229901	0.613612
ACXA	0	0	0	0.277277	0	0	0	0	0	0	1.48456	-1.28427	1.8858	0.248344	0.613612
ACXB	0.676151	1.00064	0	1.10911	1.23115	1.04138	0.652667	0	0.258353	0.186421	0.833245	-0.188097	1.40004	0.239933	0.613612
ACXC	5.74728	6.20398	4.18009	6.37738	5.84798	3.90517	3.48089	4.6129	4.9087	3.54201	0.473405	1.58053	2.05065	0.155717	0.516109
ACXD	2.02845	3.20205	1.46303	1.94094	1.84673	1.56207	2.17556	2.44212	2.06682	2.23706	0.0083977	1.66969	0.000610383	0.980346	1
ACXE	0	0	0	0	0	0	0	0	0	0	0	-1.27726	0	1	1
Acyp	0	0	0	0	0	0	0	0	0	0	0	-1.30545	0	1	1
Acyp2	17.0728	15.8101	17.9744	19.964	17.5439	18.2241	26.3243	19.2656	14.4678	17.1508	-0.116932	4.2141	0.730898	0.394936	0.798705
Ada	2.19749	2.20141	1.88104	0.554554	1.23115	2.3431	3.69845	2.17077	2.84188	2.23706	-0.662169	1.22826	2.97083	0.0883235	0.37624
Ada1-1	0	0	0	0	0	0.260345	0	0	0.258353	0	-2.24711	0.257103	3.95	0.089522	0.37624
Ada1-2	4.56402	4.00257	3.76208	2.4955	3.38567	6.50862	4.13356	6.78367	4.13364	6.71117	-0.611173	1.92399	5.04328	0.0272503	0.186887
Ada2a	20.6226	18.6119	21.9455	23.5686	23.0841	24.4724	20.6678	24.9639	25.8353	23.1163	-0.145205	4.3059	1.33966	0.250255	0.615501
Ada2b	20.6226	19.0122	22.5725	22.4595	22.4685	24.7328	24.8014	25.5066	20.9266	26.4718	-0.197439	4.62074	1.54499	0.217209	0.613612
Adam	69.6435	63.0405	74.6146	66.5465	82.795	82.5293	92.0261	74.6204	80.0894	84.4489	-0.216966	6.35124	3.11512	0.0810711	0.360467
AdamTS-A	46.1473	45.0289	44.727	47.6917	40.0125	38.7914	21.538	38.2599	36.4277	38.2164	0.37166	5.25049	10.5044	0.00168726	0.0305112
Adar	330.469	335.015	270.661	303.619	234.227	157.769	165.56	194.013	183.689	182.134	0.739941	8.07901	22.8285	7.11266e-06	0.000838258
adat	11.8326	12.0077	8.98719	10.8138	10.157	10.1535	10.4427	8.41175	9.04235	8.57538	0.210364	3.48332	1.9669	0.164328	0.533318
ade2	36.8502	29.619	65.8364	27.4504	33.2411	47.3828	44.5989	34.7324	41.8531	28.3361	-0.0184535	6.24837	0.00444394	0.947003	1
ade3	39.7238	30.4195	81.7208	32.7187	32.9333	47.9035	59.6103	34.461	40.8197	25.3533	0.0730877	6.35801	0.0509406	0.821963	1
ade5	43.4427	35.6229	169.921	32.7187	48.6305	51.8086	121.831	66.2086	51.9289	24.6076	0.0699585	7.20821	0.025539	0.873401	1
AdenoK	35.1598	34.8223	60.6113	33.5505	34.1645	32.5431	51.7783	36.6318	33.5859	31.8781	0.0917549	5.52498	0.360134	0.549989	0.95546
Adf1	54.5992	54.6351	38.2478	43.5325	44.3215	43.7379	58.305	48.8424	44.9534	43.0633	-0.0182793	5.6231	0.060282	0.968221	1
Adgf-A	32.9623	25.8166	22.7815	28.005	18.4673	19.7862	23.7136	18.4516	31.519	23.4891	0.138987	5.16835	0.482347	0.489208	0.903798
Adgf-B	0.169038	0	0	0	0	0	0	0	0	0	1.43691	-1.27097	1.70549	0.248344	0.613612
Adgf-C	27.5531	22.2143	23.4085	24.6777	28.0087	22.9103	30.2403	21.4364	24.0268	23.8619	0.0351879	4.22786	0.0806884	0.779399	1
Adgf-D	26.0318	22.4144	49.9521	29.6687	35.7034	50.7673	62.221	51.5559	41.3364	51.2659	-0.655676	5.49283	11.2805	0.00116315	0.0244116
Adgf-E	0	0	0	0	0	0.260345	0	0	0	0	-1.5232	-1.26896	1.688	0.229901	0.613612
Adh	5.4092	5.6036	6.47914	6.65465	2.46231	4.42586	9.79001	5.96963	3.61694	5.03338	-0.107261	2.74188	0.19741	0.657921	1
Adhr	0	0	0	0	0	0	0	0	0	0	0	-1.30545	0	1	1
AdipoR	306.634	264.97	381.851	260.086	236.074	222.074	336.776	228.745	228.125	192.76	0.263412	8.40093	3.06848	0.0833409	0.366757
Adk1	97.5347	100.865	101.367	117.843	119.73	104.919	124.224	101.212	107.991	115.768	-0.0475672	6.8587	0.205673	0.651307	1
Adk2	52.5707	56.8365	69.5985	57.9509	59.7109	59.0983	77.885	61.053	59.4211	52.7573	-0.0650729	5.98828	0.49293	0.484494	0.898385
Adk3	7.94477	14.2091	12.9583	11.0911	13.8505	11.9759	16.0991	12.482	15.5012	13.0495	-0.213359	3.90132	2.39468	0.125371	0.451119
AdoR	14.5372	13.4086	12.3313	15.8048	13.2349	13.5379	12.4007	14.6527	17.8263	15.6594	-0.0961119	3.65462	0.566172	0.453811	0.865158
adp	31.272	31.4202	29.2606	30.7778	36.319	32.5431	36.9845	30.3908	37.4612	32.9966	-0.102826	4.9795	1.04484	0.309527	0.695318
AdSL	19.1013	18.6119	32.8137	16.3594	15.6972	19.5259	31.328	18.9943	20.1515	17.71	-0.0616803	4.98217	0.0480564	0.826993	1
AdSS	132.356	121.478	122.268	132.539	155.741	151.521	140.106	140.558	145.453	158.458	-0.149673	7.13285	2.94433	0.0897313	0.376722
Ady43A	31.61	37.6241	39.9199	35.4915	39.7047	41.3948	36.1143	36.0891	40.8197	38.4028	-0.0666705	4.94961	0.351635	0.554724	0.959811
Aef1	82.4904	84.4542	78.7947	80.4104	71.7147	64.5655	66.3545	70.2788	65.88	65.0611	0.262198	6.19739	12.2898	0.00072183	0.0175964
aft	13.692	10.8069	8.36018	11.3684	11.0804	9.37242	13.9236	7.05502	10.5925	13.7952	0.0037037	3.6584	0.000563111	0.981122	1
Afti	93.1397	97.6627	91.126	95.3834	95.7221	86.1742	59.8278	96.3281	82.6729	94.5157	0.173489	6.49132	4.4203	0.0383975	0.23208
Ag5r	1.3523	0.800514	212.14	1.10911	0	270.759	1.08778	2.17077	703.753	5.77906	-2.16275	5.38462	3.43477	0.0672201	0.319157
Ag5r2	0.169038	0.200128	0	0.831832	0	0	0.217556	0	0.516706	0	0.589437	-0.242649	0.334661	0.56449	0.968621
AGBE	74.0385	69.2444	102.621	69.8739	88.9508	83.05	84.8468	85.7456	78.5392	71.0266	0.00573281	6.55845	0.00196739	0.964723	1
ago	90.7732	81.2521	87.9909	86.2332	82.1795	95.2862	51.7783	85.4742	84.4814	97.8712	0.0473793	6.43563	0.204763	0.652028	1
AGO1	423.777	421.27	406.305	401.497	382.581	332.46	247.143	359.806	348.26	333.881	0.328508	8.70067	10.9578	0.00135693	0.0265465
AGO2	262.515	243.356	274.632	256.481	264.082	268.936	223.865	273.518	280.313	273.667	-0.0210172	8.02896	0.136969	0.71221	1
AGO3	0.507113	0.800514	0.418009	1.38639	0	0	0.435112	0.271347	0.516706	1.11853	0.285991	1.72367	0.0801591	0.777753	1
agt	6.08535	6.20398	7.31516	6.65465	4.92461	7.28966	10.6602	11.3966	8.26729	8.01612	-0.538274	3.02149	9.39004	0.00290313	0.0440987
Ahcy13	25.5247	15.61	28.8426	23.2913	19.0829	28.6379	32.8509	23.0645	29.4522	25.3533	-0.306307	5.14826	1.44802	0.232103	0.613612
Ahcy89E	13.8611	15.8101	14.4213	11.0911	15.3894	15.1	17.4045	11.1252	16.2762	8.76181	0.0472915	3.9297	0.0879208	0.767543	1
AIF	34.9908	32.0205	36.5758	37.1551	37.2424	32.5431	34.5914	36.0891	28.1605	44.9276	0.00698462	5.11289	0.00410967	0.949032	1
Ak6	3.88787	6.00385	4.8071	4.71371	4.92461	3.38448	5.00378	4.0702	3.10023	4.28769	0.280498	2.27996	1.12545	0.291678	0.672025
Akap200	110.551	114.273	141.914	127.548	127.732	157.769	166.43	172.305	175.163	167.406	-0.432593	7.18903	10.5229	0.00167231	0.0303392
Akh	0.169038	0.600385	0.418009	0.277277	0	0.260345	0	0.271347	0.258353	0	0.979298	-0.0962036	0.702137	0.404358	0.809827
AkhR	31.441	11.4073	47.862	14.6957	26.7776	24.2121	32.1983	24.6926	29.4522	9.88033	0.153377	5.25501	0.319851	0.57315	0.977078
akirin	74.3766	77.0494	73.7786	71.5375	73.8692	69.5121	83.1063	68.9221	72.8555	72.8908	0.0126345	6.41533	0.0143109	0.905053	1
Akt1	91.9565	82.4529	91.126	85.1241	85.2573	73.9379	75.0568	56.7115	72.3388	68.6031	0.330433	6.42941	14.3125	0.000283353	0.00963342
al	0.676151	0.200128	0.627013	0.277277	0.307788	0.781035	0.435112	1.35673	0.258353	1.30495	-0.90083	0.104309	2.02557	0.15824	0.520219
Alas	176.644	164.906	177.027	199.362	164.975	204.891	208.636	191.842	180.072	187.354	-0.140056	7.52471	2.87165	0.093722	0.386225
alc	91.1113	90.458	111.399	102.038	117.575	132.516	139.453	144.628	129.176	139.816	-0.421722	6.94057	13.1559	0.000482074	0.0137605
ald	3.88787	4.40283	4.38909	5.26827	3.07788	4.68621	5.65645	4.88424	4.65035	3.91485	-0.172015	2.20971	0.454801	0.501848	0.915422
Ald	1645.58	1529.78	1392.81	1563.29	1456.76	1347.81	1655.6	1266.92	1250.17	1360.69	0.141074	10.6658	1.97658	0.163306	0.530823
Aldh	499.168	473.904	559.714	502.981	503.849	573.54	701.617	550.291	467.36	492.339	-0.133181	9.09651	1.46369	0.229614	0.613612
Aldh-III	143.513	139.89	142.541	143.352	136.35	132.776	156.64	151.683	122.459	135.156	0.0143442	7.27405	0.0347474	0.852559	1
Alg10	9.97322	8.00514	8.15118	5.82282	5.84798	7.28966	10.0076	6.51232	7.23388	8.57538	-0.0524193	3.09181	0.0739542	0.850524	1
Alg-2	49.8661	45.4292	41.8009	49.0781	35.0879	22.65	29.1525	22.5218	27.127	21.4385	0.851549	5.25046	20.1072	2.21945e-05	0.00172673
Alh	134.892	140.89	137.316	141.411	142.814	152.041	68.3125	156.296	142.352	149.324	0.0620741	6.99064	0.487544	0.486883	0.900597
alien	54.092	54.2348	53.2961	51.2963	53.2474	54.1517	61.1332	55.8974	53.2207	54.9943	-0.0698359	5.71128	0.572332	0.451373	0.862031
ALiX	118.326	117.475	128.329	133.093	140.967	163.757	127.923	151.14	158.37	148.578	-0.233376	7.20162	8.53327	0.00443918	0.05856
Alk	289.9	287.184	249.76	265.909	227.763	218.95	148.591	203.51	237.426	235.637	0.339698	7.92558	9.55786	0.00267351	0.0417552
AlkB	4.90209	7.60488	6.27013	5.54554	4.92461	2.60345	4.78623	2.44212	5.16706	4.28769	0.590219	2.43405	6.02491	0.0160929	0.135855
alph	118.326	119.877	112.026	103.424	119.73	95.0259	112.911	116.95	107.991	114.836	0.0660371	6.87359	0.604968	0.438795	0.848522
alpha4GT1	31.272	27.2175	30.9327	34.9369	29.2399	31.7621	36.5494	27.1347	27.127	28.5225	0.0210424	4.83614	0.031845	0.878512	1
alpha4GT2	0	0	0	0	0	0	0	0	0	0.186421	-1.4904	-1.23499	1.94218	0.229901	0.613612
alpha-Cat	208.592	208.934	185.178	204.353	193.599	134.078	164.037	163.893	166.379	144.29	0.373387	7.629	16.0231	0.000131068	0.00560306
alpha-catenin-related	103.62	108.269	110.772	108.97	114.805	111.167	89.633	120.207	114.192	116.327	-0.0135873	6.6393	0.0321243	0.858171	1
alphaCOP	97.3657	99.0636	109.1	100.929	98.8	108.043	83.3239	111.795	115.484	104.769	-0.0498879	6.68801	0.435801	0.510897	0.925167
alpha-Est1	43.4427	43.4279	51.6241	52.96	36.9346	41.3948	52.2134	40.702	34.1026	31.1324	0.196605	5.76452	2.34525	0.129286	0.459535
alpha-Est10	19.6084	14.4092	14.4213	13.5866	14.7738	12.7569	15.4465	9.49714	13.6927	10.0668	0.329473	4.06219	3.46366	0.0661021	0.316182
alpha-Est2	11.6636	5.6036	25.4985	6.1001	9.54144	10.4138	18.7098	12.7533	9.3007	6.89759	0.0301398	4.11055	0.00658094	0.93553	1
alpha-Est3	19.4393	15.2098	17.5564	18.3003	16.9284	15.881	18.9274	16.8235	17.8263	16.0322	0.0335392	3.90687	0.0439234	0.834485	1
alpha-Est4	3.21172	2.20141	1.25403	1.38639	2.46231	1.82241	1.30533	1.08539	0.516706	2.05064	0.614837	1.25973	3.12406	0.0806436	0.359426
alpha-Est5	2.53556	2.60167	6.27013	3.32733	3.38567	3.38448	6.09156	3.25616	3.10023	1.86421	0.0339398	2.35062	0.0102404	0.919628	1
alpha-Est6	0	0	0	0	0	0	0	0	0.258353	0	-1.52241	-1.20678	1.69424	0.229901	0.613612
alpha-Est7	104.127	87.6563	159.052	92.8879	100.647	110.126	136.407	100.67	100.499	75.6871	0.0588845	6.97623	0.13454	0.71466	1
alpha-Est8	81.4761	82.0527	84.0198	69.042	54.7863	64.3052	82.6712	60.5103	67.9468	63.1969	0.137204	6.04423	1.51779	0.221267	0.613612
alpha-Est9	115.284	114.073	105.547	106.474	116.652	87.9966	95.9421	101.484	101.791	88.1773	0.23185	6.67177	6.22199	0.0145035	0.126881
alphagamma-element:CR32865	0	0	0	0.277277	0	0	0	0	0	0	1.48323	-0.860855	1.57164	0.248344	0.613612
alphaKap4	0	0	0	0	0	0	0	0	0	0	0	-1.30545	0	1	1
alpha-Man-I	178.842	185.919	177.863	169.416	167.745	150.219	140.759	152.226	159.662	154.357	0.217058	7.51135	6.07152	0.0157011	0.133248
alpha-Man-Ib	118.664	119.877	109.309	122.557	112.651	85.1328	92.8963	99.3129	95.3322	99.1762	0.305013	6.69664	17.212	7.74557e-05	0.00392077
alpha-Man-II	50.3732	55.4356	53.0871	51.019	42.7826	52.3293	38.0723	38.8026	51.6706	51.2659	0.124657	5.58535	2.27572	0.13503	0.472095
alpha-Man-IIb	169.714	175.713	147.557	164.425	140.044	131.995	97.465	139.472	159.145	134.783	0.268487	7.24135	11.722	0.000943187	0.0211484
alphaSnap	449.978	455.692	411.321	476.64	430.288	422.54	584.79	489.238	392.438	477.984	-0.090215	8.8774	1.74236	0.190296	0.583836
alpha-Spec	668.206	668.429	651.467	713.989	698.987	791.188	344.173	758.957	859.023	810.187	-0.0672327	9.43372	0.365234	0.547183	0.953211
alphaTry	0	0	0	0	0	0.260345	0	55.6261	0	0	-8.71678	3.80672	10.9132	0.00149639	0.0282346
alphaTub67C	2.19749	2.8018	1.46303	5.82282	2.77009	2.60345	3.04578	2.71347	3.61694	3.16916	-0.0635101	2.91972	0.0137357	0.906972	1
alphaTub84B	1069.84	1191.56	1057.98	1092.47	1136.66	1153.33	1118.89	1024.33	1135.2	1113.68	0.000765024	9.96489	0.000126483	0.991053	1
alphaTub84D	134.216	149.296	152.364	155.553	140.659	185.886	161.426	168.506	156.303	190.336	-0.237022	7.14797	7.93578	0.00599443	0.0709617
alphaTub85E	4.0569	4.80308	1.67204	5.26827	7.38692	5.72759	4.35112	4.88424	4.13364	5.59264	-0.119909	1.55942	0.0584158	0.809585	1
Alr	15.0443	18.0116	16.3024	14.1411	17.2361	18.7448	20.0151	17.9089	19.6348	20.1335	-0.257773	4.03777	3.18774	0.0776704	0.350415
alrm	42.0904	42.2271	37.2028	50.1872	43.3981	75.7604	86.1521	88.4591	71.047	84.0761	-0.917619	5.76075	29.575	4.84827e-07	0.000142275
alt	89.2519	92.2592	115.579	98.988	116.652	110.126	90.0681	118.036	108.767	117.259	-0.0876684	6.7302	0.388858	0.534529	0.944214
aly	0	0	0	0	0	0	0	0	0	0	0	-1.19464	0	1	1
Ama	0	0.600385	0.627013	0.277277	0.307788	0.260345	0.870223	0.271347	0.775058	0.372843	-0.492642	0.549713	0.371972	0.543518	0.95029
amd	6.59247	5.00321	6.27013	8.87287	7.69471	6.76897	4.56867	7.32636	8.52564	6.71117	0.0127165	3.00778	0.00305584	0.999971	1
amn	0.338075	0	0	0.554554	0	0	0.217556	0	0	0.186421	0.79123	-0.866817	0.539237	0.464814	0.878525
Amnionless	5.91632	6.60424	4.38909	5.26827	9.23365	4.16552	2.82823	3.52751	5.16706	4.84696	0.592502	2.53841	7.94478	0.00596721	0.0707897
amon	384.054	395.654	351.755	374.324	369.961	329.336	257.369	332.129	327.075	345.066	0.237715	8.41766	11.9924	0.00083017	0.0192588
amos	0	0	0	0	0	0	0	0	0	0	0	-1.26955	0	1	1
AMPdeam	293.618	297.791	318.732	293.359	302.556	297.314	263.025	306.893	299.172	279.446	0.0591417	8.27517	1.34643	0.249071	0.614315
Amph	253.725	239.554	213.812	256.759	206.218	220.512	256.933	245.026	211.849	242.534	-0.00818734	7.90393	0.0111823	0.916027	1
AMPKalpha	211.973	222.543	217.574	202.69	207.142	233.009	204.502	204.596	221.15	224.824	-0.0348146	7.73229	0.308175	0.580224	0.983629
Amun	105.649	104.267	115.161	118.12	124.654	134.078	107.255	135.673	138.735	143.544	-0.216773	6.95354	3.89029	0.0517357	0.272562
amx	10.9874	9.80629	10.2412	9.98198	10.7726	10.9345	14.7938	12.7533	11.6259	7.45686	-0.145229	3.53417	0.879801	0.350848	0.744372
Amy-d	0.676151	0.600385	10.2412	0.554554	0.307788	0.781035	3.04578	14.11	1.29176	0.559264	-0.521257	4.18998	0.191941	0.66239	1
Amy-p	0	0	2.71706	0	0	0.52069	0.435112	12.2106	0	0.186421	-2.03159	4.05434	0.87369	0.352518	0.746117
Amyrel	0	0	0.209004	0	0	0	0	0	0	0	1.45954	-1.10889	1.66194	0.248344	0.613612
ana	16.2276	21.814	22.3635	24.1231	20.6218	31.7621	35.244	30.3908	25.8353	36.3522	-0.610413	4.602	24.4263	3.70259e-06	0.000584276
ana1	14.1992	15.8101	17.1384	15.8048	16.9284	19.2655	17.1869	17.9089	23.5101	22.557	-0.334988	4.4177	5.10047	0.0264154	0.183197
ana2	1.52134	1.4009	2.50805	1.94094	2.46231	1.56207	2.39311	1.35673	1.80847	2.05064	0.059715	1.6057	0.0175818	0.894818	1
ana3	4.22594	4.40283	2.92606	4.43644	3.07788	3.64483	3.04578	3.25616	4.9087	5.2198	-0.0747158	2.39249	0.0487017	0.825854	1
Ance	26.5389	24.2155	23.1995	29.6687	25.5464	24.4724	23.9311	33.1043	22.735	22.3706	0.0306492	4.75568	0.062135	0.803739	1
Ance-2	0	0	0.209004	0	0	0	0	0	0	0	1.45957	-0.986552	1.51553	0.248344	0.613612
Ance-3	35.1598	31.22	22.3635	26.8959	34.1645	25.2535	21.3205	20.0797	26.352	18.8286	0.425906	5.00663	8.42728	0.0046809	0.060289
Ance-4	11.3255	4.80308	40.3379	6.65465	9.84922	14.0586	28.2823	12.7533	13.4343	5.03338	0.01348	4.81059	0.000796887	0.977544	1
Ance-5	24.0033	20.0128	33.6497	24.4004	12.6193	25.2535	37.202	27.9487	30.4856	21.252	-0.295508	4.95008	1.91477	0.169967	0.544644
Andorra	0.507113	0.200128	0	0	0	0	0.435112	0	0	0	0.715848	-0.947028	0.480963	0.490124	0.90499
angel	7.77573	8.20527	6.47914	7.20921	10.157	13.7983	11.9656	11.9393	10.3341	10.626	-0.564272	3.31618	10.5547	0.0016469	0.0300611
Ank	801.915	764.491	754.088	740.053	639.892	471.485	519.741	491.138	536.599	498.118	0.55616	9.40695	21.4372	1.26722e-05	0.00121029
Ank2	1189.35	1406.3	1283.29	1490.92	1453.99	1532.13	943.54	1610.99	1817.77	1676.67	-0.151897	10.5443	1.90018	0.171585	0.547701
Anp	0	0	0	0	0	0	0	0	0.258353	0	-1.52233	-1.16203	1.58879	0.229901	0.613612
Ant2	4.90209	3.40218	2.92606	2.77277	4.61682	4.42586	5.22134	4.6129	4.13364	3.54201	-0.225763	2.25148	0.883281	0.349902	0.743308
antdh	3.21172	3.80244	2.29905	5.54554	1.84673	3.64483	6.09156	1.62808	1.29176	2.23706	0.138335	4.10634	0.0279711	0.867564	1
Antp	1.69038	2.00128	1.46303	1.66366	1.53894	1.30172	0.652667	4.6129	1.55012	2.79632	-0.360772	1.83749	0.715603	0.399906	0.804284
antr	0.169038	0	0.209004	0	0	0.260345	0	0	0	0	0.631827	-0.352539	0.343316	0.591775	0.986409
AnxB10	113.424	151.897	130.628	125.329	157.588	183.543	182.312	185.33	160.179	174.118	-0.384579	7.11947	10.9161	0.0013843	0.0268621
AnxB11	73.7004	71.2457	68.3445	62.3874	59.0953	58.3173	60.0454	53.4553	58.1294	52.198	0.250221	5.98859	8.35529	0.00485284	0.0617535
AnxB9	259.473	257.565	251.641	229.586	254.233	256.179	303.055	238.514	256.803	240.111	-0.0476093	7.88553	0.468979	0.495274	0.909457
aop	61.3607	62.8403	52.0421	55.4554	54.1707	55.1931	41.7707	55.3548	49.8621	49.4017	0.188022	5.8666	3.85911	0.0526621	0.275878
aos	34.4837	29.4189	22.1545	28.5596	24.3153	19.7862	24.5838	19.537	20.9266	21.9977	0.381038	4.62307	13.2133	0.000469446	0.013469
Aos1	14.5372	15.8101	14.0033	16.0821	19.3907	14.319	23.2785	17.6375	16.0179	18.6421	-0.185038	4.076	1.26492	0.26381	0.635071
ap	80.1238	67.8435	107.01	77.6376	66.1745	71.0742	66.137	75.1631	66.9134	64.129	0.219035	6.32417	3.59114	0.0614028	0.302439
AP-1-2beta	142.161	142.692	148.602	151.393	141.275	173.91	123.354	157.924	164.571	166.101	-0.11378	7.1575	2.21139	0.140604	0.483527
AP-1gamma	152.472	156.5	151.737	141.411	152.047	149.698	87.4574	139.201	143.386	148.391	0.175623	7.18281	5.95615	0.0166896	0.137961
AP-1mu	63.8962	61.4394	57.6852	65.7147	71.7147	80.1862	67.4423	74.6204	75.439	67.2981	-0.188531	5.97381	5.34075	0.0231923	0.16911
AP-1sigma	128.469	115.874	112.444	107.029	84.334	76.0207	114.869	90.0871	68.9802	90.6008	0.316569	6.64705	7.25576	0.00847625	0.0888917
AP-2alpha	251.866	266.971	251.223	262.582	229.302	238.997	194.277	232.002	233.293	241.789	0.146558	7.9051	5.89664	0.0172248	0.140683
AP-2mu	105.141	111.472	106.801	121.17	114.497	116.374	128.575	123.463	115.484	124.902	-0.124299	6.75881	3.13015	0.0803542	0.358614
AP-2sigma	59.5012	69.6447	62.9104	67.9329	59.4031	54.1517	90.7208	66.48	55.5458	68.2302	-0.0717275	5.85736	0.647992	0.423022	0.829163
Apc	212.142	223.143	217.156	227.922	213.913	225.979	110.301	230.373	246.727	257.075	0.0320027	7.69237	0.118254	0.731764	1
APC10	8.95899	7.80501	9.4052	7.76376	6.77134	11.4552	10.6602	6.51232	6.45882	9.13465	-0.114792	3.01766	0.464547	0.497313	0.911124
Apc2	1.85941	2.00128	1.46303	3.32733	0.615577	2.60345	2.61067	3.79886	1.80847	2.05064	-0.450487	1.89929	1.09234	0.298843	0.681121
APC4	9.12803	12.6081	11.4952	10.5365	11.0804	9.89311	11.748	17.6375	16.5346	9.69391	-0.247467	3.47742	2.22045	0.139803	0.481805
APC7	0.676151	0.200128	0.209004	1.94094	0.615577	0.260345	0.652667	0.271347	0.258353	1.30495	0.190439	1.33568	0.0493252	0.824761	1
ApepP	12.6778	14.4092	15.0483	13.8639	12.9271	14.0586	19.58	13.296	16.7929	15.2866	-0.199175	3.92877	1.46296	0.22973	0.613612
Apf	12.1707	11.8076	12.1223	12.2002	11.0804	15.3603	15.0114	13.296	12.4009	15.2866	-0.265189	3.66228	2.94081	0.0899201	0.377249
aph-1	11.8326	10.2065	13.1673	13.5866	8.31028	12.2362	16.7518	15.1954	8.78399	10.626	-0.148839	3.69076	1.00606	0.318625	0.708823
Aph-4	70.8268	81.6524	73.7786	87.3423	60.6343	78.8845	86.3697	91.4439	82.4145	81.6526	-0.167994	5.88498	2.22613	0.139303	0.480736
aPKC	214.34	229.948	207.123	211.84	204.987	202.548	122.701	191.028	192.731	191.828	0.246752	7.76923	7.25898	0.00846226	0.088886
Aplip1	178.504	198.728	179.326	204.353	200.678	194.478	211.682	218.977	189.631	222.401	-0.110121	7.53481	3.3441	0.0708663	0.330989
Apoltp	149.936	99.4638	344.23	108.693	152.047	158.029	189.491	131.603	218.05	88.7366	0.123814	7.65255	0.18812	0.665558	1
app	341.287	321.406	275.05	278.664	265.313	227.802	128.793	221.69	251.894	254.838	0.45058	8.19102	21.7183	1.12689e-05	0.00112871
APP-BP1	34.6527	33.2213	29.0516	31.055	34.1645	34.6259	29.37	33.3757	27.127	31.5052	0.056574	4.86748	0.330411	0.566898	0.97107
Appl	978.39	1043.27	948.671	1024.54	1070.8	923.704	572.172	1023.25	991.558	1027.37	0.158682	9.98094	2.67978	0.105235	0.404752
Aprt	8.45188	9.40604	9.4052	4.43644	10.157	7.55	16.3167	5.15559	8.52564	9.69391	-0.184077	3.34876	1.04692	0.309049	0.69478
Aps	153.993	158.101	140.869	145.016	135.119	121.581	125.965	124.005	123.751	121.733	0.249493	7.233	9.06072	0.00341516	0.0489088
apt	18.087	22.4144	19.2284	18.8549	21.5452	19.0052	17.622	17.6375	23.2517	20.3199	0.0313283	4.44823	0.0488268	0.825634	1
AQP	38.2025	33.2213	34.0677	42.978	43.0904	36.4483	52.6485	30.3908	28.9355	37.4707	0.0340499	5.15248	0.0300077	0.862874	1
aqrs	0	0	0	0	0	0	0	0	0	0	0	-1.27722	0	1	1
ara	8.28284	8.00514	6.47914	8.59559	6.77134	7.55	5.65645	8.1404	7.23388	12.4902	-0.115693	3.05996	0.377756	0.540407	0.948719
aralar1	127.285	111.872	160.724	117.566	112.035	124.966	140.541	125.091	124.009	110.921	0.0106916	7.45101	0.00909707	0.924233	1
Arc1	211.466	209.534	173.265	164.148	275.163	209.317	278.254	178.818	336.634	198.539	-0.21809	7.63497	2.02367	0.158432	0.520751
Arc2	5.91632	3.80244	4.38909	4.43644	4.61682	9.11207	9.13734	6.51232	7.23388	6.89759	-0.736517	2.67511	9.12139	0.00331423	0.047956
Arc42	19.1013	19.2123	20.2734	17.1912	20.314	21.6086	25.454	21.1651	13.4343	16.9643	-0.037131	4.52978	0.0573351	0.811321	1
aret	72.5171	64.0411	54.7592	67.3784	56.633	59.8793	54.8241	53.998	56.0625	65.0611	0.122196	6.1867	0.96223	0.32934	0.72182
Arf102F	85.533	85.4548	79.6307	66.5465	77.8704	62.7431	97.6826	66.48	64.8465	64.129	0.151393	6.379	1.33756	0.250625	0.615986
Arf51F	98.887	93.46	85.9008	92.8879	82.795	70.8138	107.255	79.2333	71.3054	83.1439	0.140166	6.51724	1.85757	0.176416	0.558129
Arf79F	242.4	220.542	256.658	231.804	225.301	216.867	320.46	262.664	223.475	233.213	-0.09483	7.93139	1.55834	0.215251	0.613612
ArfGAP1	41.2452	40.2258	49.7431	45.1962	46.1682	57.2759	45.6867	53.7267	55.0291	44.1819	-0.200132	5.60212	2.82155	0.0965872	0.393956
ArfGAP3	39.8929	42.8275	51.4151	48.2462	42.167	51.8086	45.6867	51.0132	54.2541	47.9103	-0.158248	5.65245	2.51972	0.116051	0.430514
Arfip	33.1314	35.823	35.7398	37.987	33.2411	40.8741	35.0265	38.5312	39.528	38.4028	-0.128518	5.17456	2.35673	0.128365	0.457623
Arfrp1	13.354	9.60616	13.7943	11.9229	8.61807	16.4017	12.1831	13.5673	11.3675	12.3038	-0.185604	3.69199	1.49019	0.225479	0.613612
arg	1.69038	1.80116	5.43412	2.4955	3.07788	4.68621	5.65645	4.88424	3.87529	2.23706	-0.553724	1.98033	1.79673	0.183591	0.571493
Argk	2780.67	2673.72	2395.19	2815.2	2703	2872.12	3138.46	2576.71	2662.07	2858.77	-0.0778051	11.2158	0.595001	0.442578	0.85288
ari-1	139.625	139.69	133.972	145.016	145.892	116.374	121.396	146.256	137.185	141.867	0.0862506	7.13816	1.6445	0.203109	0.606679
ari-2	54.092	55.2354	57.4762	53.5145	53.2474	63.7845	42.6409	48.8424	59.1628	55.74	0.019618	5.7276	0.0618646	0.804158	1
Ark	97.0276	105.067	89.4539	93.7197	95.4144	69.7724	68.3125	76.5198	80.6061	78.297	0.364273	6.31363	17.0583	8.28708e-05	0.0040675
Arl1	19.7774	20.6132	25.0805	19.964	20.314	24.7328	25.2365	20.8937	21.4433	17.1508	-0.0455088	4.3596	0.153825	0.729426	1
Arl2	13.1849	12.8082	11.0772	13.032	13.2349	10.1535	18.0571	10.0398	8.26729	11.3717	0.118582	3.56968	0.593726	0.443065	0.853328
Arl4	127.961	130.684	109.1	120.338	112.035	52.069	105.95	85.4742	80.0894	81.4662	0.5662	6.69425	14.9261	0.000214466	0.00791733
Arl6	0.676151	0.200128	0	0.554554	0.307788	1.30172	2.17556	1.08539	1.03341	0.186421	-1.62864	0.782274	7.60613	0.00708609	0.0790194
arm	502.718	549.152	535.47	546.513	501.079	580.048	442.944	585.838	546.674	588.346	-0.0583384	9.01024	1.06167	0.305684	0.690223
armi	7.77573	8.40539	8.98719	9.98198	8.61807	11.1948	7.61445	8.41175	7.75058	8.76181	-0.00273974	3.43322	0.000125073	0.991103	1
Arp1	81.9833	89.2573	82.7658	81.5195	100.647	90.6	117.915	99.0416	89.3901	105.142	-0.205753	6.47141	9.23736	0.00312983	0.0462071
Arp10	21.4678	25.8166	27.1706	21.3503	26.7776	35.9276	31.7631	28.4914	24.8019	27.4039	-0.276131	4.72694	4.99458	0.0279833	0.189735
Arp2	78.9406	77.2496	71.6885	70.7057	76.0237	66.6483	78.9728	75.1631	76.9891	78.4834	-0.00639691	6.16738	0.00781637	0.929753	1
Arp3	41.2452	43.0276	41.5919	38.5415	41.8592	39.5724	42.6409	37.7172	38.7529	35.0472	0.0917026	5.28579	1.23629	0.269244	0.642342
Arp5	12.0017	14.8095	16.5114	14.973	17.8517	18.4845	17.4045	19.2656	12.1426	20.6928	-0.221146	4.0509	1.66766	0.199986	0.600613
Arp53D	0	0	0	0.277277	0	0	0	0	0	0	1.48424	-1.19604	1.67391	0.248344	0.613612
Arp6	18.4251	17.0109	16.7204	13.5866	22.1608	20.3069	25.0189	21.1651	19.6348	19.3878	-0.266037	4.17904	4.2945	0.0411898	0.242003
Arp8	7.43766	6.80437	7.94217	8.87287	6.15577	9.37242	5.4389	6.24098	11.6259	8.57538	-0.14353	3.01342	0.633452	0.428254	0.83509
Arpc1	96.6895	92.0591	97.3961	90.9469	110.804	124.705	107.473	92.2579	106.183	111.48	-0.153341	6.56573	1.99945	0.160918	0.524796
Arpc2	42.9356	48.8313	42.0099	38.8188	42.167	34.6259	46.3394	39.6166	35.6527	39.1485	0.136581	5.46517	0.957496	0.330526	0.72182
Arpc3A	15.8895	16.4105	16.0933	16.0821	15.0816	16.6621	21.7556	16.0095	15.5012	14.7273	-0.0888019	4.00816	0.528317	0.469263	0.883068
Arpc3B	1.3523	1.00064	0.836018	1.38639	1.84673	1.04138	2.82823	1.08539	1.29176	1.67779	-0.349488	0.919506	0.680143	0.411788	0.816499
Arpc4	24.3414	30.4195	21.7365	24.4004	28.0087	35.9276	37.6372	29.0341	28.9355	33.183	-0.356622	4.74355	7.00053	0.00966631	0.0962709
Arpc5	15.2134	16.4105	18.8104	17.4685	19.6984	19.5259	22.8434	16.8235	25.3186	21.0656	-0.276717	4.16825	3.90485	0.0513092	0.271524
arr	54.4301	52.6338	60.8203	55.4554	49.8617	48.9448	29.8051	56.1688	52.704	52.3844	0.190185	5.78432	4.46786	0.0373952	0.229099
Arr1	8421.45	8486.85	7537.96	7708.58	8546.66	6693.99	8325.86	6833.87	6493.96	7185.8	0.195891	12.5268	4.83057	0.0306098	0.201185
Arr2	9851.18	9261.34	9021.26	8712.05	10211.5	11031.6	12868.2	9961.14	11260.6	11052	-0.255477	13.0717	7.95028	0.00595063	0.0707436
Ars2	126.44	131.885	136.689	127.548	159.434	135.119	125.747	148.155	144.161	145.968	-0.036984	7.07035	0.230188	0.632586	1
Art1	19.2703	17.8114	18.8104	23.5686	21.2374	16.6621	25.6716	19.2656	19.8932	20.1335	-0.0230012	4.50151	0.0217889	0.882991	1
Art2	2.87364	1.00064	1.46303	1.66366	0.615577	1.04138	0.652667	0.271347	1.55012	0.932107	0.806527	0.830367	4.80715	0.0310057	0.203124
Art3	9.97322	7.40475	10.8682	11.0911	15.0816	11.1948	17.1869	13.296	7.75058	10.2532	-0.15367	3.50627	0.704518	0.403566	0.808921
Art4	24.6795	21.814	25.0805	24.955	27.0854	22.65	20.6678	20.351	20.1515	22.9298	0.206871	4.58906	2.42413	0.123103	0.446764
Art6	0	0	0	0	0	0	0	0	0	0	0	-1.30545	0	1	1
Art7	9.29707	8.60552	8.15118	8.31832	8.92586	11.7155	10.6602	14.9241	10.5925	10.9989	-0.436328	3.53121	6.31702	0.0137968	0.12269
Art8	2.02845	2.40154	2.92606	2.21822	3.07788	3.64483	3.69845	2.71347	3.35859	4.47411	-0.520614	1.92242	3.49058	0.0650781	0.313345
Art9	0	0	0	0	0	0	0	0	0	0	0	-1.30545	0	1	1
aru	54.5992	51.0327	44.309	45.1962	61.8654	60.9207	43.9463	49.6565	63.2964	58.1635	-0.10381	5.76068	0.685398	0.409995	0.814703
arx	3.21172	3.20205	2.71706	3.88188	4.00125	3.12414	6.09156	3.52751	3.61694	3.91485	-0.278284	2.207	1.12263	0.292281	0.672698
ARY	0	0	0	0	0	0	0	0	0	0	0	-1.30545	0	1	1
Asap	141.654	158.902	147.557	146.957	160.665	146.053	95.507	154.396	148.553	149.137	0.123899	7.20559	3.21022	0.0766495	0.347337
Asator	766.079	755.085	702.673	702.343	628.196	484.762	480.363	558.974	541.249	579.398	0.42665	9.23876	19.898	2.42577e-05	0.00184436
Asciz	5.74728	8.80565	8.98719	9.42743	8.00249	9.63276	12.8358	11.9393	7.49223	10.9989	-0.381218	3.11856	4.08337	0.0463759	0.256609
ase	0	0	0.209004	0	0	0	0	0.271347	0	0	-0.0668824	-1.14381	0.00196565	0.964824	1
asf1	12.8469	16.2104	12.9583	15.5275	18.1595	13.5379	15.664	16.2808	12.9176	15.473	0.023697	3.97402	0.0228064	0.977614	1
ash1	77.7573	69.0443	72.7336	80.1331	84.6418	80.1862	50.9081	84.9316	84.9981	80.7205	0.00937037	6.21808	0.0111851	0.916016	1
ash2	28.7364	24.8159	28.6336	26.6186	31.0866	38.531	37.8547	31.4762	29.4522	33.3694	-0.289615	5.04346	10.27	0.00188966	0.0330978
asl	2.36653	2.8018	2.50805	3.05005	3.07788	4.42586	3.04578	4.0702	3.61694	3.54201	-0.442737	2.14875	1.43121	0.23481	0.613612
asp	0.507113	0.400257	1.04502	3.05005	1.53894	0.260345	1.30533	1.89943	1.03341	2.6099	-0.282078	1.92596	0.128663	0.72069	1
asparagine-synthetase	95.3372	88.2566	98.2321	93.4424	84.334	77.3224	106.602	81.6754	80.8644	74.1957	0.128282	6.30438	2.03577	0.157209	0.518228
Asph	123.567	124.08	103.875	127.27	161.897	122.102	112.911	122.649	112.9	130.868	0.0884796	7.07952	0.577351	0.449403	0.860164
ASPP	67.7841	66.2425	62.2833	68.7648	77.5626	63.5242	38.5074	62.4098	73.1138	69.1623	0.158652	6.11922	2.04996	0.155786	0.516109
asrij	21.1297	23.415	22.5725	22.7367	22.4685	23.431	33.286	23.6072	27.3854	24.9805	-0.243027	4.47681	3.93335	0.0504852	0.268681
ast	7.77573	9.60616	8.36018	7.20921	9.23365	11.1948	8.26712	9.22579	10.3341	10.0668	-0.216941	3.27704	1.78811	0.184636	0.572768
AstA	53.2469	62.0398	49.5341	55.4554	58.172	71.3345	101.599	68.6507	66.9134	76.8056	-0.471159	5.89274	23.2606	5.95512e-06	0.000760392
AstA-R1	15.0443	13.0083	12.7493	11.9229	12.6193	13.7983	10.4427	11.1252	9.3007	10.4396	0.254609	3.91524	1.69577	0.196273	0.593681
AstA-R2	1.52134	0.200128	1.46303	1.66366	1.23115	0.781035	0.652667	1.35673	0.516706	0.745686	0.573032	0.916377	1.21267	0.273835	0.648237
AstC	124.412	140.69	116.416	119.784	144.968	112.729	182.312	153.582	120.134	132.732	-0.119532	6.88144	1.57951	0.212188	0.613612
AstCC	0.676151	0.600385	0.627013	0.277277	0.615577	0.52069	0.435112	0.542694	0.258353	0.559264	0.276239	0.365133	0.210187	0.647762	1
AstC-R1	84.5188	89.6575	86.1099	93.4424	84.6418	69.5121	58.5225	78.9619	74.6639	82.7711	0.266025	5.60065	5.71863	0.0189365	0.14934
AstC-R2	21.1297	18.2117	15.8843	14.4184	16.005	15.1	14.7938	12.2106	14.7261	13.4223	0.294693	4.10071	4.0728	0.0466533	0.257356
asun	9.97322	11.4073	9.61421	9.7047	9.84922	11.9759	10.0076	8.95445	10.8508	12.4902	-0.104151	3.42913	0.623069	0.432051	0.840144
Asx	89.928	84.2541	82.9748	82.3513	95.4144	78.6242	45.4692	76.2485	79.831	73.0772	0.301372	6.38856	10.3833	0.00178893	0.0316651
Atac1	4.73305	4.40283	7.10615	5.82282	6.46355	6.50862	7.17934	5.96963	6.97552	5.2198	-0.166543	2.59425	0.825071	0.366206	0.762454
Atac2	9.12803	11.0071	13.3763	10.5365	8.00249	10.9345	10.0076	11.9393	12.4009	11.931	-0.128675	3.47627	0.91307	0.359601	0.753919
Atac3	13.692	14.6094	15.2573	11.3684	22.1608	16.1414	16.9694	21.1651	15.7595	16.4051	-0.172972	3.95047	1.67217	0.199384	0.599731
ATbp	9.63515	7.60488	6.27013	4.15916	8.92586	7.81035	7.3969	7.59771	9.55905	7.8297	-0.121434	3.09212	0.433077	0.541632	0.948847
Ate1	69.4745	54.6351	57.4762	62.3874	62.7888	61.9621	80.9308	55.8974	60.1962	66.9253	-0.0892502	5.8801	0.95848	0.330279	0.72182
Atet	148.922	153.699	138.57	156.662	117.575	120.279	106.602	134.859	131.502	135.901	0.186552	7.07133	6.15741	0.0150053	0.129579
Atf-2	12.0017	14.009	20.0644	15.2502	13.8505	12.2362	23.7136	16.8235	14.9845	20.1335	-0.234608	3.85457	2.66779	0.106005	0.406337
Atf3	96.3515	93.46	80.8847	76.2512	74.4848	60.6604	50.0378	65.6659	71.8221	59.0956	0.460571	6.17719	20.0256	2.29774e-05	0.00176304
Atf6	147.232	130.684	110.772	119.784	92.6443	44.519	65.7019	57.2542	61.488	51.4523	1.10256	6.76548	32.6361	1.51731e-07	6.04288e-05
Atg1	130.835	151.297	138.988	145.293	122.808	133.557	106.167	141.914	136.152	149.883	0.0463147	7.17093	0.557779	0.457166	0.869276
Atg10	2.53556	1.60103	2.71706	2.77277	3.07788	2.3431	2.82823	1.35673	1.55012	2.79632	0.180774	1.76524	0.291901	0.611827	0.996013
Atg101	74.7146	73.0469	81.0937	80.965	89.8742	66.6483	68.095	72.7209	66.3967	68.0438	0.223233	6.32034	10.4515	0.00173088	0.0310648
Atg12	15.7205	18.6119	14.2123	15.8048	12.3115	15.1	25.2365	13.8387	13.6927	17.71	-0.159613	3.91794	1.47218	0.22828	0.613612
Atg13	33.4695	35.4227	38.0388	35.2142	31.3944	33.3241	27.6296	24.9639	33.5859	32.9966	0.186786	5.16599	2.88878	0.0927639	0.3836
Atg14	36.3431	39.2252	35.9488	44.0871	49.2461	42.4362	47.2096	44.2295	35.3943	45.4868	-0.0760777	5.30432	0.543462	0.462981	0.875975
Atg16	17.918	19.6126	17.1384	17.4685	20.314	18.2241	24.8014	20.6224	25.3186	20.8792	-0.251323	4.42293	5.68706	0.0192583	0.151023
Atg17	113.931	111.872	123.313	110.634	112.035	121.06	89.1979	109.624	136.152	123.597	-0.0188998	6.9428	0.0648661	0.799564	1
Atg18a	88.4067	77.6498	89.2449	81.2422	74.177	78.6242	88.7628	83.0321	73.6305	76.0599	0.0393649	6.4414	0.30788	0.580405	0.983678
Atg18b	63.2201	58.6376	57.6852	62.1101	60.3265	53.3707	55.0416	57.7969	56.5793	52.5708	0.133765	5.92619	2.11711	0.149253	0.501503
Atg2	85.195	91.2586	90.917	89.5605	88.9508	93.2035	65.4843	85.4742	94.5571	87.4316	0.0660595	6.53181	0.733917	0.393965	0.797611
Atg3	27.7222	32.2207	36.7848	32.996	36.9346	41.6552	42.6409	41.7874	33.5859	40.0806	-0.26589	5.16952	4.74859	0.0320196	0.207239
Atg4a	47.3305	44.8288	62.4923	46.028	54.7863	57.0155	68.3125	53.4553	54.5124	49.9609	-0.149835	5.82993	1.70733	0.194769	0.591485
Atg4b	43.2736	44.4285	38.0388	43.5325	38.4735	41.9155	44.5989	42.6015	43.4033	41.7584	-0.0432734	5.39688	0.271133	0.603893	0.993574
Atg5	22.651	19.2123	23.1995	21.6276	20.0062	18.4845	21.9731	14.6527	16.0179	19.5742	0.230408	4.23398	4.16132	0.0443839	0.25324
Atg6	23.4962	28.4182	28.8426	24.4004	33.2411	34.8862	36.9845	29.0341	30.2273	29.641	-0.221036	4.79268	4.47569	0.0372329	0.229099
Atg7	16.2276	13.4086	14.0033	15.5275	17.2361	11.4552	16.3167	14.9241	20.6682	14.168	-0.0241105	4.12857	0.0285073	0.866313	1
Atg8a	551.232	551.754	504.328	523.777	454.295	414.729	615.9	471.601	407.939	445.361	0.134424	9.03773	2.23289	0.138712	0.479594
Atg8b	0.169038	0	0.209004	0.277277	0	0	0	0	0	0	2.64359	-0.928699	3.60756	0.0613537	0.302376
Atg9	37.8644	36.0231	43.0549	47.4144	44.3215	45.3	41.7707	43.4155	50.3788	42.5041	-0.101257	5.47401	0.952047	0.331899	0.72182
atilla	110.72	119.477	108.264	93.7197	119.114	111.428	150.549	100.398	97.399	111.294	-0.0517328	6.80831	0.271522	0.603634	0.993574
atk	0.507113	0.400257	0.418009	0	0.307788	0.260345	0.652667	1.62808	1.03341	1.11853	-1.35402	1.81729	1.2597	0.264789	0.636001
atl	138.104	119.277	121.641	135.311	130.194	115.593	119.221	110.438	119.617	118.75	0.142726	6.94355	3.52894	0.0636485	0.308862
atms	31.441	39.8256	36.3668	39.9279	50.1695	38.0104	35.6792	38.8026	43.4033	39.7078	0.00840529	5.28974	0.00598907	0.938491	1
ato	0.338075	0.400257	0.836018	1.66366	0.923365	0.260345	0.652667	0.542694	0.516706	0.186421	0.859058	-0.194208	2.02223	0.15858	0.52103
Atox1	65.2485	61.0392	69.3895	69.3193	75.4081	76.2811	97.6826	75.4344	65.6216	76.4328	-0.204903	6.13471	5.31115	0.0235659	0.170937
ATP7	43.4427	47.0302	45.354	42.4234	38.1657	43.2173	25.8891	36.6318	46.7618	38.5892	0.185038	5.43623	3.71097	0.0573143	0.289734
Atpalpha	5419.35	5717.07	5015.69	5552.48	4844.28	4511.52	3451.74	5014.22	4759.89	5097.69	0.217418	12.1995	8.16814	0.00533127	0.0657157
ATPCL	366.305	348.223	402.334	339.942	342.261	356.933	276.078	325.888	343.092	361.285	0.113524	8.3503	2.96844	0.0884495	0.37624
ATPsyn-b	485.983	498.72	501.611	535.145	527.241	563.386	757.094	560.331	516.706	576.415	-0.222987	9.00558	4.09103	0.046176	0.256011
ATPsyn-beta	2786.75	2824.21	2590.4	2812.15	2518.94	2325.66	3314.68	2313.23	2376.85	2453.87	0.0820299	11.3167	0.613545	0.435579	0.844941
ATPsyn-Cf6	257.951	284.182	269.616	275.614	309.635	326.993	429.673	297.125	312.865	326.424	-0.278175	8.10439	6.10483	0.0154273	0.131794
ATPsyn-d	294.802	335.615	313.925	361.015	357.65	396.245	461.218	365.776	346.193	395.773	-0.241739	8.43465	3.47057	0.0658373	0.315277
ATPsyn-gamma	446.09	486.512	476.321	495.772	487.229	553.233	652.45	511.217	496.812	532.792	-0.199714	8.91584	3.26894	0.0740516	0.340396
AttA	4.22594	2.40154	12.5403	2.77277	4.92461	4.94655	4.56867	3.79886	28.1605	4.84696	-0.739233	4.78178	0.352012	0.554512	0.959665
AttB	2.53556	2.20141	1.04502	1.38639	3.69346	4.16552	6.52667	3.25616	17.3096	4.10127	-1.69904	4.39467	1.86757	0.175268	0.555668
AttC	0.676151	0.800514	10.8682	0.554554	0.923365	1.04138	4.35112	2.44212	15.5012	0.372843	-0.66078	6.12878	0.112104	0.738566	1
AttD	0	0	0	11.3684	0	0.260345	0.217556	0	0.775058	0.186421	2.77371	1.06325	4.04828	0.0473038	0.259128
att-ORFA	15.2134	15.8101	13.3763	11.3684	11.3882	11.7155	13.0533	15.1954	10.5925	13.0495	0.090056	3.80582	0.375313	0.541717	0.948847
att-ORFB	0	0	0	0	0	0	0	0	0	0	0	-1.30545	0	1	1
Atu	13.354	16.0103	12.7493	14.973	18.4673	22.9103	16.5342	19.537	20.9266	20.3199	-0.414523	4.09064	3.58526	0.0616114	0.303076
Atx-1	0.338075	0.200128	0.418009	0.277277	0	0	0	0	0.258353	0.186421	1.27693	-0.653065	1.60862	0.208063	0.613612
Atx2	189.829	189.321	189.149	186.053	173.593	184.324	109.866	180.174	199.19	193.505	0.0988247	7.46295	1.43764	0.233771	0.613612
Atxn7	29.9197	36.2232	25.7076	33.8278	33.8567	33.5845	25.2365	40.1593	35.911	41.3856	-0.146585	4.9602	1.59822	0.209525	0.613612
aub	4.0569	4.00257	4.18009	4.15916	3.07788	2.08276	5.22134	2.71347	3.61694	4.66054	0.0764203	2.02395	0.0321871	0.858034	1
aur	1.52134	1.4009	0.627013	0.554554	0.307788	1.82241	2.39311	2.17077	2.06682	2.6099	-1.21259	1.65133	6.00582	0.0162562	0.136592
aust	0	0	0	0	0	0	0	0	0	0	0	-1.2841	0	1	1
aux	118.833	115.474	115.161	116.456	91.4131	93.4638	83.1063	107.453	107.475	110.175	0.153581	6.7132	4.32876	0.0404085	0.239007
ave	9.97322	10.2065	8.15118	9.15015	8.61807	10.1535	13.706	10.0398	8.26729	10.0668	-0.179047	3.37612	1.30772	0.255939	0.623702
Aven	6.76151	6.40411	6.68814	6.93193	6.15577	9.63276	8.48468	8.1404	7.49223	7.45686	-0.317504	2.89853	4.32737	0.0529937	0.277181
awd	270.291	259.166	296.577	252.045	264.698	319.964	422.058	264.563	252.669	274.599	-0.192043	8.05745	2.44179	0.121765	0.444181
Awh	5.91632	4.60295	6.06113	8.31832	5.2324	7.02931	5.00378	5.15559	6.71717	6.33833	-0.0123752	2.63882	0.00356613	0.952518	1
Axn	84.6879	81.4523	88.6179	86.2332	85.8729	84.3517	62.6561	92.8006	84.4814	88.1773	0.0500635	6.35691	0.600323	0.440551	0.850647
axo	86.2092	81.6524	72.9426	82.9059	78.486	134.598	67.4423	110.71	139.769	140.189	-0.558474	6.47757	27.9549	9.09048e-07	0.000202742
Axs	34.6527	39.8256	35.5308	41.5916	36.0112	35.4069	35.6792	33.9184	34.8776	33.7423	0.110488	5.12823	0.980238	0.32488	0.716261
Axud1	39.5548	33.8217	42.8459	45.4735	39.3969	38.0104	29.37	37.7172	34.8776	39.1485	0.165096	5.5303	3.65099	0.0593227	0.296649
az2	12.5088	10.0064	10.8682	8.87287	11.696	15.1	13.2709	11.9393	12.9176	12.3038	-0.274257	3.5311	3.4974	0.0648215	0.31292
b	23.3272	24.4157	21.1095	26.3413	31.3944	29.9397	25.2365	28.2201	21.1849	32.6237	-0.127833	5.05224	0.559603	0.456434	0.868673
B4	225.496	217.94	192.702	191.044	183.134	142.409	108.343	137.301	161.47	143.172	0.546008	7.49599	32.7137	1.47387e-07	6.01304e-05
B52	647.921	639.811	632.03	630.251	687.291	591.764	495.81	611.616	552.617	667.202	0.149163	9.13884	6.28636	0.0140208	0.124022
b6	2.02845	1.4009	1.67204	2.77277	2.15452	2.08276	1.52289	1.35673	2.32517	1.67779	0.14373	1.48118	0.17287	0.678595	1
bab1	12.0017	15.4099	14.2123	10.5365	14.7738	12.4966	6.30912	11.9393	9.55905	11.7445	0.366432	3.74809	5.01344	0.0276969	0.188745
bab2	51.2184	51.433	43.8909	46.028	43.3981	41.9155	27.1945	44.2295	48.5703	46.4189	0.183752	5.59599	3.36257	0.0701062	0.328846
babo	173.095	172.511	164.487	159.157	136.658	121.581	102.034	136.759	134.085	144.849	0.335367	7.33847	12.5602	0.000636007	0.0161825
babos	32.7933	23.415	43.6819	20.5185	30.1632	26.2948	46.7745	29.8482	26.352	19.5742	0.0233653	5.25649	0.0141854	0.905468	1
Bacc	544.639	547.952	481.964	510.745	505.388	410.043	616.336	526.956	415.431	460.647	0.0927037	9.05547	1.16124	0.284182	0.662049
Bace	0	0.200128	0.627013	0.277277	0	0.781035	0.217556	26.3206	0.258353	0	-4.40361	2.47841	11.4244	0.00108616	0.0232588
baf	19.6084	23.8153	24.6625	21.6276	32.01	27.3362	27.6296	32.833	27.127	33.9287	-0.300649	4.7054	5.45271	0.0218351	0.162834
bai	71.1648	60.839	64.7914	62.1101	67.7134	69.7724	94.2017	73.8063	75.6974	73.45	-0.244714	6.16706	9.64784	0.00255822	0.0408315
Baldspot	212.987	195.726	177.236	177.18	186.52	146.053	158.163	129.161	152.686	145.782	0.376149	7.46264	14.7322	0.000234139	0.00835062
ball	3.71883	6.20398	4.8071	4.43644	4.92461	7.02931	4.35112	5.42694	8.26729	6.52475	-0.388068	2.8849	1.71708	0.193511	0.589356
bam	0	0	0	0.554554	0	0	0	0	0.258353	0.186421	-0.0188202	-0.288454	0.00038861	0.984327	1
ban	0	0	0	0	0	0	0	0	0	0	0	-1.30545	0	1	1
bap	1.69038	1.00064	1.04502	0.554554	1.53894	0	0.217556	1.08539	1.03341	1.30495	0.654931	0.41652	2.04343	0.156439	0.517079
Bap170	39.3858	38.4247	40.3379	41.3143	40.3203	47.9035	32.1983	41.7874	43.92	42.8769	-0.0621577	5.34873	0.261548	0.610352	0.995152
Bap55	16.3967	19.0122	18.8104	16.0821	17.2361	20.8276	24.3663	17.6375	18.6014	24.4212	-0.277902	4.25141	4.37731	0.0393282	0.234358
Bap60	34.1456	35.4227	36.7848	33.2733	37.5502	42.6966	49.8203	39.0739	37.4612	37.8435	-0.224879	5.28485	4.06151	0.0469517	0.258257
barc	56.1205	61.8397	69.1805	68.7648	73.8692	71.0742	73.969	81.6754	75.6974	72.3315	-0.187123	6.01279	2.24067	0.138035	0.478435
barr	5.74728	6.40411	6.68814	8.04104	8.00249	6.76897	6.96179	7.59771	8.00894	6.15191	-0.0354009	3.08627	0.025123	0.874428	1
baz	72.8552	63.841	59.1483	62.3874	60.3265	69.2517	31.9807	48.2997	65.6216	65.6203	0.1848	6.09482	3.13673	0.080042	0.357507
bbc	211.466	210.935	206.496	210.176	203.14	202.288	205.59	205.41	196.606	212.707	0.0273767	7.60362	0.363056	0.548378	0.954001
bbg	44.4569	43.8281	44.727	40.2052	39.7047	36.969	30.2403	39.3453	52.9623	36.5386	0.124812	5.4857	1.22123	0.27216	0.646008
BBS1	0.169038	0.400257	0.418009	1.38639	0.923365	0.52069	0.217556	0.542694	1.03341	0.186421	0.330113	-0.0614709	0.250566	0.619805	1
BBS4	1.52134	2.40154	1.25403	3.05005	3.69346	1.82241	3.04578	2.71347	1.55012	1.49137	0.116325	1.74943	0.113361	0.804203	1
BBS8	1.69038	1.20077	0.836018	0.554554	0.307788	2.08276	1.74045	1.35673	1.80847	1.67779	-0.810368	0.889953	3.37097	0.0697638	0.327608
bbx	2.02845	1.60103	0.418009	0.554554	0.615577	0.260345	0.870223	1.35673	1.29176	0.745686	0.288867	0.714966	0.311004	0.578494	0.982383
bc10	52.4017	47.0302	49.3251	48.8008	46.7838	40.0931	62.0034	39.6166	41.0781	48.2831	0.0779814	5.60007	0.675978	0.413218	0.818849
BCAS2	8.45188	7.60488	7.73317	5.82282	8.31028	10.1535	10.0076	8.95445	11.1092	10.626	-0.417953	3.09326	3.93951	0.0503088	0.268315
bcd	0	0	0	0	0	0	0	0.271347	0	0	-1.51999	0.552632	0.685327	0.411085	0.815904
bchs	243.245	253.763	219.246	240.677	196.984	200.466	100.728	186.415	216.758	204.318	0.345992	7.68494	11.8597	0.000883781	0.0200584
BCL7-like	11.3255	12.0077	11.9133	10.8138	8.61807	6.50862	10.2251	9.22579	9.8174	8.76181	0.302169	3.44372	3.38877	0.0690436	0.325047
bcn92	13.1849	19.4125	19.8554	17.7457	20.6218	23.431	31.328	28.7628	19.1181	30.0138	-0.557863	4.39773	11.2252	0.0011942	0.0247025
Bdbt	13.8611	11.4073	13.5853	9.7047	13.5427	20.0466	18.0571	17.6375	13.176	15.473	-0.435904	3.87451	8.25256	0.00510968	0.0639071
bdg	30.9339	33.2213	33.2317	27.7277	42.167	34.1052	24.1487	35.0037	34.6193	33.5559	0.0494101	5.03605	0.282035	0.596721	0.989819
be	37.8644	33.8217	31.1417	31.6096	34.1645	33.0638	32.4158	28.7628	30.4856	31.3188	0.112843	4.95624	1.4021	0.239591	0.613612
BEAF-32	26.877	22.0141	28.2156	24.4004	26.4698	31.7621	37.6372	28.7628	23.2517	32.2509	-0.266817	4.84448	5.92618	0.0169569	0.13938
beag	18.2561	22.2143	21.9455	22.7367	26.4698	28.1172	29.5876	32.0189	25.8353	32.2509	-0.414298	4.588	7.10018	0.00918213	0.0934243
beat-Ia	30.2577	31.6203	29.8876	34.9369	30.7788	29.6793	25.6716	35.5464	35.136	35.0472	-0.0335839	4.98329	0.118686	0.731294	1
beat-Ib	81.1381	75.6485	79.0037	82.6286	83.4106	67.4293	67.4423	78.4192	64.5882	76.992	0.178057	5.98237	3.91566	0.0509949	0.270448
beat-Ic	37.1883	44.6286	42.0099	47.4144	33.5489	31.7621	30.0227	35.5464	34.1026	37.2843	0.279417	5.45845	4.52306	0.0362668	0.22518
beat-IIa	115.115	132.885	121.641	131.707	107.726	92.9431	102.469	103.383	105.666	105.701	0.255694	6.81697	10.1266	0.00202576	0.0345984
beat-IIb	39.3858	39.4253	42.4279	42.1461	46.1682	38.0104	33.7211	42.8728	32.8108	40.0806	0.157759	5.39418	3.04508	0.084506	0.370131
beat-IIIa	0	0	0	0	0	0	0	0	0	0	0	-1.30545	0	1	1
beat-IIIb	68.2912	64.8416	58.5213	59.6146	63.4044	56.2345	53.9538	49.9278	57.3543	61.7055	0.172317	6.035	3.2805	0.0735519	0.33902
beat-IIIc	38.7096	41.8268	28.2156	33.2733	34.7801	28.1172	26.1067	26.3206	24.2852	23.6755	0.464345	5.17535	10.6826	0.00154851	0.0288762
beat-IV	63.2201	71.8461	67.5085	59.8919	72.3302	59.619	52.4309	53.7267	63.0381	65.0611	0.186891	5.96346	5.45957	0.0217548	0.162455
beat-Va	66.7699	89.6575	57.2672	61.2783	38.4735	44.7793	59.3927	76.2485	44.9534	52.7573	0.179998	5.36573	0.699732	0.405161	0.810455
beat-Vb	33.1314	32.6209	31.9777	38.8188	37.858	31.7621	39.3776	35.2751	27.6437	31.8781	0.0664329	5.03845	0.363061	0.548375	0.954001
beat-Vc	25.5247	25.2162	23.6175	29.1141	25.8542	26.0345	20.4502	26.3206	23.7685	26.099	0.0745219	4.52598	0.557379	0.457327	0.869285
beat-VI	55.9515	61.8397	50.5791	60.1692	55.7097	42.4362	45.0341	52.9126	45.9868	54.9943	0.234215	5.81618	5.90454	0.0171527	0.1403
beat-VII	137.428	147.094	142.541	130.875	134.503	113.771	82.0185	124.277	101.533	123.597	0.345634	6.98033	11.2693	0.00116933	0.0244492
beg	9.29707	9.80629	9.1962	11.0911	14.1583	11.4552	11.9656	12.2106	9.8174	12.8631	-0.142217	3.45298	0.939701	0.335037	0.725363
bel	183.575	179.915	197.509	181.339	181.903	200.986	132.056	190.485	187.564	191.455	0.0348888	7.42624	0.285456	0.594507	0.988958
Bem46	18.9322	22.4144	19.6464	24.1231	14.7738	16.1414	20.2327	16.0095	21.7016	15.6594	0.158238	4.35199	1.34407	0.249483	0.614714
ben	178.335	160.103	133.763	176.903	151.432	136.16	164.037	148.155	118.067	151.001	0.157579	7.50506	2.75629	0.100466	0.399724
Best1	92.2945	88.2566	78.1677	77.9149	86.1807	78.6242	71.5759	74.349	72.3388	81.6526	0.159987	6.24789	4.47231	0.0373029	0.229099
Best2	76.7431	72.6466	67.9265	66.2693	58.7876	51.0276	59.8278	51.5559	66.655	56.2993	0.265465	6.0499	7.51629	0.00741819	0.0813133
Best3	0.169038	0.200128	0	0.554554	0.307788	0.260345	0	0.271347	0	0.372843	0.265879	-0.900544	0.0895378	0.800942	1
Best4	0	0.400257	0	0.277277	0	0	0	0	0	0.186421	1.16421	-1.08695	0.879915	0.352038	0.745479
Bet1	16.0586	16.6107	14.4213	18.3003	15.3894	15.881	23.7136	14.9241	12.1426	17.1508	-0.061484	4.04185	0.21108	0.647066	1
Bet3	27.046	25.4163	24.0355	26.3413	32.9333	31.7621	37.8547	33.1043	20.6682	30.7595	-0.189939	4.65212	2.7463	0.101074	0.399724
Bet5	17.4109	19.8127	17.1384	16.0821	17.5439	12.2362	23.9311	15.7381	14.7261	18.0829	0.0489549	4.09454	0.170234	0.742501	1
beta3GalTII	9.97322	7.40475	7.94217	9.42743	8.00249	6.76897	9.3549	6.78367	7.23388	11.1853	0.035991	3.0068	0.0510504	0.927325	1
beta4GalNAcTA	32.1172	33.6216	31.1417	34.6597	31.3944	23.1707	29.37	23.6072	24.0268	21.8113	0.416654	4.84703	10.203	0.001952	0.0337305
beta4GalNAcTB	12.8469	14.4092	13.7943	13.3093	17.5439	17.7035	19.1449	13.8387	15.7595	13.2359	-0.154436	3.85381	1.41972	0.236684	0.613612
beta4GalT7	7.26862	7.20462	6.27013	8.04104	6.15577	9.37242	7.83201	6.78367	5.68376	6.15191	-0.0313225	2.80728	0.0229307	0.889924	1
betaCOP	88.9138	92.2592	107.637	105.643	93.2598	127.309	79.843	117.493	123.234	115.208	-0.20681	6.88592	2.98452	0.0876055	0.37624
beta'COP	58.6561	61.8397	68.1355	58.5055	63.7122	68.4707	58.7401	66.2086	68.9802	69.1623	-0.0929229	6.02063	1.38015	0.243275	0.613612
betaggt-I	23.3272	19.4125	19.6464	18.5776	21.853	22.1293	19.3625	19.537	23.5101	19.9471	-0.0195687	4.45584	0.0221226	0.952664	1
betaggt-II	35.3289	33.0212	38.6658	29.3914	35.0879	49.4655	40.6829	42.0588	35.911	38.7757	-0.267307	5.11844	5.36072	0.0229438	0.167737
betaNACtes1	0	0	0	0	0	0	0	0	0	0.186421	-1.49026	-1.28433	1.95175	0.229901	0.613612
betaNACtes2	0	0	0	0	0	0.260345	0	0	0	0	-1.5232	-1.27608	1.798	0.229901	0.613612
betaNACtes3	0	0	0	0	0	0.260345	0	0	0	0	-1.52312	-1.23441	1.94693	0.229901	0.613612
betaNACtes4	0.169038	0	0	0	0	0	0.217556	0	0	0	-0.0693591	-1.20276	0.00259511	0.969295	1
betaNACtes6	0	0	0	0	0	0	0	0	0.258353	0	-1.52247	-1.24289	1.78631	0.229901	0.613612
beta-Spec	668.544	729.468	693.686	750.589	840.878	854.452	371.368	818.382	921.286	911.041	-0.0739697	9.46634	0.314211	0.576545	0.980367
betaTry	0.169038	0	0	0	0	0	0	64.3092	0	0	-7.46642	3.85975	10.4851	0.00187124	0.0328439
betaTub56D	477.7	508.526	488.443	532.65	545.709	532.145	615.03	497.65	503.271	533.165	-0.0711188	8.82155	0.582438	0.447419	0.858845
betaTub60D	15.2134	13.8089	15.8843	11.6456	8.92586	21.3483	12.6182	11.3966	12.6593	13.7952	-0.113033	3.9412	0.263463	0.609049	0.995152
betaTub85D	0.338075	1.60103	1.46303	1.66366	0.923365	1.82241	0	1.89943	0.775058	0.932107	0.156127	0.635646	0.103836	0.748045	1
betaTub97EF	88.0686	86.6556	87.5729	86.2332	74.177	131.995	122.266	127.262	127.368	139.07	-0.614777	6.86197	49.5612	4.18495e-10	1.10088e-06
bft	0	0	0	0	0	0	0	0	0	0	0	-1.30545	0	1	1
BG642163	0	0	0	0	0	0	0	0	0	0	0	-1.2267	0	1	1
BG642167	0	0	0	0	0	0	0	0	0	0	0	-1.27612	0	1	1
BG642312	0.169038	0.400257	0.209004	0	0	0	0	0.271347	0	0.186421	0.742949	-1.02147	0.464504	0.497621	0.911288
Bgb	38.5406	41.6267	43.8909	39.3734	48.9383	46.3414	49.1676	46.6717	39.2696	52.0116	-0.141385	5.29782	1.9091	0.170594	0.545743
bgcn	0.676151	0.400257	0.209004	0.554554	0.307788	0.260345	0.652667	0.81404	0	0.372843	0.0531288	-0.497191	0.00445151	0.946958	1
bgm	41.5833	20.8134	156.335	40.2052	39.3969	53.1104	111.171	49.9278	39.2696	30.946	0.0737213	6.37912	0.0466558	0.829493	1
B-H1	7.60669	9.80629	6.27013	5.82282	6.15577	7.02931	6.52667	5.42694	6.20047	8.38896	0.0917623	2.92583	0.210285	0.647685	1
B-H2	2.7046	5.40347	2.92606	3.6046	1.53894	3.38448	3.48089	3.52751	3.61694	4.10127	-0.143653	2.35437	0.253283	0.616042	0.999457
BHD	8.95899	8.40539	9.82321	10.2593	12.0037	8.59138	13.0533	9.22579	18.343	12.6767	-0.337793	3.3402	4.64743	0.0338553	0.21475
bi	39.5548	40.8262	31.5597	35.7688	32.3178	33.8448	24.5838	37.1745	35.3943	35.7929	0.11538	5.11025	1.21681	0.273024	0.64734
BI-1	182.392	185.319	176.609	185.776	147.738	129.912	205.155	138.116	143.127	137.393	0.22008	7.31523	5.09835	0.0264458	0.183197
bib	12.3397	15.2098	14.0033	14.1411	12.6193	15.3603	10.8778	16.8235	13.4343	17.3372	-0.111528	3.64004	0.54335	0.463027	0.875975
bic	264.882	255.564	314.343	266.186	248.693	318.402	397.474	292.241	295.556	307.222	-0.255185	8.25718	9.53151	0.00270828	0.0420637
BicC	0	0	0	0	0	0	0	0	0	0	0	-1.30545	0	1	1
BicD	130.835	142.091	122.686	142.798	131.426	104.919	94.8543	119.664	118.067	114.276	0.279813	7.00318	11.7296	0.000939792	0.0211289
bif	376.785	389.25	369.102	363.788	379.811	379.583	202.327	401.322	426.024	408.636	0.0478759	8.64232	0.283536	0.595747	0.989383
BigH1	0.338075	0	0.209004	1.66366	0	0	0	0.271347	0	2.42348	-0.609095	2.04073	0.263118	0.609415	0.995152
bigmax	12.1707	15.61	20.0644	14.4184	19.0829	22.3897	28.4998	19.8083	24.8019	23.4891	-0.558081	4.43549	11.2704	0.00116876	0.0244492
Bili	99.7322	107.069	98.4411	105.365	104.34	79.6655	93.7666	97.9562	86.2898	91.5329	0.196306	6.60801	5.0758	0.0267721	0.184667
bin	0.169038	0.200128	0	0.277277	0.307788	0.260345	0	0.271347	0.516706	0.186421	-0.35664	-0.794691	0.131467	0.717933	1
Bin1	6.25439	9.60616	7.31516	8.04104	8.00249	8.07069	11.3129	10.5825	8.52564	9.32107	-0.29214	3.2448	1.8722	0.174739	0.554623
bin3	108.691	108.069	109.518	108.693	87.1041	103.878	67.0072	99.8556	103.599	101.786	0.135403	6.65091	2.96913	0.0884128	0.37624
bip1	8.62092	10.8069	11.4952	9.7047	11.3882	9.11207	10.4427	7.32636	10.3341	8.94823	0.164346	3.41816	0.853773	0.358038	0.752364
bip2	316.946	328.01	304.52	288.923	279.164	190.312	212.987	222.776	228.384	197.234	0.529769	8.04774	24.4996	3.59431e-06	0.000578097
Bka	9.29707	12.408	8.98719	9.15015	8.61807	5.2069	9.57246	7.32636	5.94211	7.08401	0.461034	3.01989	6.85903	0.0104001	0.101541
bl	120.017	127.882	123.104	127.27	136.658	143.971	137.06	157.381	142.611	154.357	-0.212719	7.15134	9.03336	0.00346171	0.0493851
blanks	0	0.200128	0.209004	0.831832	0.307788	0	0.217556	0	0	0	2.08694	-0.916321	3.62152	0.0606717	0.300039
Blimp-1	108.691	107.669	96.9781	95.1061	92.6443	89.819	54.8241	74.349	106.183	85.381	0.290311	6.64918	3.0159	0.0859843	0.374715
Blm	7.77573	12.0077	9.1962	8.87287	10.157	10.9345	8.70223	8.41175	14.2094	12.3038	-0.1887	3.42503	1.03729	0.311272	0.698148
Blos1	12.1707	12.6081	12.5403	9.15015	13.2349	19.0052	23.9311	16.0095	20.4099	21.0656	-0.750103	3.93662	21.9648	1.01695e-05	0.00106316
Blos2	8.62092	11.0071	7.10615	10.8138	10.4648	5.72759	11.748	9.49714	8.52564	10.9989	0.0270867	3.20724	0.0262227	0.948356	1
Blos3	6.59247	8.40539	9.82321	8.04104	7.69471	5.98793	10.8778	7.32636	6.20047	9.88033	-0.00594517	3.03186	0.00112442	0.973327	1
Blos4	4.73305	6.60424	7.52416	9.15015	7.38692	7.02931	8.70223	8.6831	5.16706	7.64328	-0.094901	2.98113	0.24995	0.61837	1
blot	80.969	75.4484	73.3606	68.2102	68.6368	63.5242	52.2134	51.0132	64.3298	64.3154	0.313174	6.06118	11.916	0.000860583	0.0197087
blow	20.6226	24.4157	25.4985	21.0731	27.7009	23.6914	21.538	31.7476	21.96	23.1163	-0.0330016	4.45103	0.0585103	0.809434	1
blp	17.918	18.4118	19.6464	21.3503	21.2374	17.1828	25.8891	19.2656	20.9266	15.8458	-0.0129362	4.31232	0.011144	0.91617	1
blue	65.7556	60.4388	71.6885	62.1101	65.5589	69.7724	40.6829	69.7361	72.5971	71.7722	0.00606918	5.86849	0.00425293	0.948153	1
blw	2253.27	2416.95	2146.27	2430.61	2164.98	2300.41	2415.3	2302.38	2227.26	2414.34	-0.0309832	11.0881	0.0889521	0.766223	1
BM-40-SPARC	136.244	138.689	196.673	143.352	140.659	206.453	297.399	219.52	167.929	206.741	-0.539264	7.43917	10.2043	0.00195081	0.0337305
Bmcp	27.5531	26.6171	30.3057	25.7868	29.8555	32.0224	36.1143	34.7324	24.5435	25.9126	-0.128917	4.73414	1.27402	0.26211	0.631927
bmm	61.3607	55.2354	97.8141	54.6236	61.2499	63.2638	63.5263	60.7817	67.9468	48.8424	0.122286	6.41391	0.410974	0.523157	0.939235
bnb	362.079	343.621	351.546	357.133	378.272	545.683	444.031	556.261	461.676	516.201	-0.49356	8.4295	18.7923	3.89481e-05	0.00249611
bnk	0	0	0	0	0	0	0	0	0	0	0	-1.26169	0	1	1
bnl	15.0443	13.2085	13.5853	13.5866	16.3128	10.9345	9.3549	6.78367	14.9845	14.168	0.341193	3.43006	3.20612	0.0768347	0.347789
BobA	0	0	0	0	0	0	0	0	0	0	0	-1.20567	0	1	1
boca	16.3967	14.6094	17.1384	18.5776	22.1608	26.5552	26.9769	24.9639	19.8932	26.6583	-0.504764	4.29884	10.3986	0.00177574	0.0314982
bocksbeutel	33.1314	31.22	26.5436	26.0641	27.0854	20.3069	30.6754	24.1499	26.8687	26.6583	0.164433	4.56679	2.03954	0.156829	0.517515
boi	6.76151	7.80501	8.15118	8.04104	8.92586	7.81035	5.4389	7.32636	6.20047	6.71117	0.239832	2.98297	1.21946	0.272506	0.646554
bol	311.029	322.007	268.153	283.932	247.462	172.869	139.453	199.169	174.646	209.538	0.678132	8.06304	25.7994	2.13106e-06	0.000381836
boly	0	0	0	0	0	0	0	0	0	0	0	-1.30545	0	1	1
bon	123.736	127.882	109.727	123.666	119.422	109.866	77.885	106.911	109.542	122.106	0.199651	6.74921	7.31347	0.00822903	0.0875061
bond	90.9422	72.4465	69.8075	60.4464	77.2549	54.4121	66.7896	55.6261	67.6884	46.9782	0.351251	6.07824	6.8	0.0107233	0.103561
bonsai	17.0728	17.0109	20.2734	18.3003	20.9296	23.6914	35.4616	21.1651	25.5769	23.4891	-0.474336	4.41122	11.1619	0.00123082	0.0251994
bor	60.5155	57.8371	57.0582	67.6556	60.3265	67.95	57.6523	60.239	62.7797	61.5191	-0.0324402	5.64378	0.100593	0.751877	1
bora	0	0	0	0	0	0	0	0.542694	0	0.745686	-3.5716	0.472976	4.05609	0.0480199	0.261334
borr	0.338075	0	0	0.831832	0.307788	0.260345	0.217556	0	0	0.932107	-0.218471	0.964198	0.0353969	0.851225	1
boss	359.881	360.231	334.198	333.842	275.163	302.26	299.139	340.812	354.202	327.17	0.0357216	8.30133	0.189739	0.664211	1
botv	23.8343	25.4163	27.1706	25.2322	22.4685	21.869	23.7136	17.3662	22.735	22.7434	0.193532	4.61883	3.97327	0.0493547	0.2651
bou	9.12803	9.20591	9.4052	7.76376	9.23365	8.07069	12.6182	8.95445	10.0758	9.32107	-0.132971	3.57403	0.659277	0.419027	0.825011
bowl	24.8485	18.6119	19.0194	23.2913	23.3919	20.8276	15.8816	16.0095	21.1849	15.2866	0.294157	4.43265	4.42977	0.0381958	0.231486
BoYb	0.338075	0	0	0.554554	0	0	0	0.81404	0	0.372843	-0.358534	0.233314	0.0955915	0.758041	1
br	57.4728	57.8371	55.8042	62.3874	54.1707	41.6552	23.9311	53.4553	52.1873	44.5547	0.418537	5.52028	13.2047	0.000471317	0.0134764
Br140	27.7222	31.8204	30.0966	24.4004	27.0854	30.2	19.1449	30.6622	38.2362	32.4373	-0.0883392	4.95266	0.468444	0.495519	0.909487
brat	105.818	105.268	93.007	97.3243	71.4069	59.0983	50.6905	60.7817	71.8221	69.3488	0.603779	6.66327	16.3551	0.000113074	0.00508436
Brca2	18.9322	16.4105	13.7943	18.023	15.0816	18.2241	17.1869	19.537	17.3096	20.3199	-0.168888	4.1639	1.63242	0.20476	0.609886
Brd	0	0	0	0	0	0	0	0	0	0	0	-1.18369	0	1	1
Brd8	9.29707	9.80629	10.4502	8.87287	16.9284	14.0586	11.0953	13.8387	14.2094	16.9643	-0.36242	3.54538	2.92938	0.0905368	0.378697
Bre1	34.9908	35.0225	43.6819	42.4234	52.6318	52.069	34.3738	46.6717	54.2541	56.1128	-0.229231	5.48894	1.49757	0.224343	0.613612
Brf	34.8218	28.2181	27.3796	27.7277	28.9321	38.7914	33.286	43.6868	34.1026	36.5386	-0.336272	5.07354	12.0754	0.000798327	0.0188328
brk	7.26862	5.6036	7.94217	9.98198	10.4648	11.1948	7.83201	11.9393	11.3675	10.8124	-0.382553	3.35116	4.56847	0.0353657	0.220815
brm	86.0402	93.8602	100.113	99.5425	111.112	110.647	64.179	101.484	120.392	101.973	-0.0240336	6.56348	0.0441969	0.833978	1
Brms1	23.6653	29.4189	31.1417	22.4595	30.471	32.2828	39.3776	40.9734	31.519	27.5904	-0.322678	4.81379	6.07799	0.0156475	0.133131
brn	4.90209	3.20205	4.8071	5.82282	1.53894	5.46724	3.916	2.98482	6.20047	4.84696	-0.187658	2.31071	0.643385	0.424669	0.831169
Bro	0	0	0	0	0	0	0	0	0	0	0	-1.25585	0	1	1
brp	737.511	792.108	718.139	792.458	806.405	687.31	323.941	793.418	760.074	807.95	0.189719	9.50698	2.66769	0.106012	0.406337
bru	67.277	65.2419	67.5085	64.051	62.1732	66.9086	41.118	52.0986	54.2541	57.9771	0.262414	5.90755	11.029	0.0013115	0.0261278
bru-2	46.6544	50.2322	37.8298	39.3734	40.6281	32.0224	32.8509	28.2201	35.3943	28.7089	0.45369	5.24611	12.5768	0.000631114	0.016117
bru-3	289.9	300.993	274.632	304.45	281.626	167.402	142.499	241.227	201.774	222.401	0.573871	8.05128	17.5184	6.77224e-05	0.00351799
Bruce	434.934	435.079	416.128	413.698	379.195	344.957	197.323	331.314	427.574	354.387	0.329291	8.57699	13.3312	0.000444521	0.0131003
brv1	0	0	0	0	0	0	0	0	0	0	0	-1.30545	0	1	1
brv2	0	0.400257	0	0	0	0	0	0	0	0	2.16077	-1.04019	2.77941	0.102566	0.399724
brv3	0.169038	0.200128	0.209004	0	0.307788	0	0	0	0	0.745686	-0.00392448	-0.747445	7.93121e-05	0.992915	1
BRWD3	87.2234	88.2566	89.6629	95.3834	90.4897	102.055	37.6372	96.0568	105.15	105.701	0.0148904	6.40579	0.0181006	0.893287	1
bs	22.651	17.4112	18.1834	16.6366	19.0829	14.0586	18.4922	18.4516	17.568	15.2866	0.169826	4.17514	1.73389	0.191366	0.586176
bsf	134.216	126.881	130.001	131.429	119.114	134.338	107.255	117.765	126.076	136.46	0.0455383	6.82779	0.274283	0.601802	0.992931
Bsg	468.065	462.297	424.488	431.998	380.426	304.343	364.406	397.794	358.077	362.59	0.278559	8.82922	9.56882	0.00265919	0.0416491
Bsg25A	0	0	0	0	0	0	0	0	0	0	0	-1.2771	0	1	1
Bsg25D	62.3749	59.4381	60.8203	74.033	87.4119	71.5948	47.2096	63.4952	75.6974	74.3821	0.0447821	6.12482	0.149076	0.70036	1
bsh	4.0569	4.2027	3.76208	3.88188	5.2324	5.46724	8.04956	5.69828	4.392	5.77906	-0.489126	2.32454	5.16875	0.0254539	0.178669
bsk	203.521	204.932	186.85	199.917	192.06	155.686	230.392	183.702	161.987	174.863	0.122584	7.49941	2.01127	0.159699	0.522553
bt	1515.76	1334.46	1108.56	1359.21	1418.29	963.276	766.449	850.944	1121.77	987.101	0.522517	10.0845	9.97849	0.00217696	0.0361968
BTBD9	54.9372	54.4349	49.7431	52.96	61.8654	53.1104	38.0723	54.5407	53.7374	51.2659	0.127692	5.62515	1.74879	0.189488	0.582636
BtbVII	162.276	163.705	164.905	172.744	174.516	177.816	97.2474	167.692	152.686	179.337	0.113254	7.34398	2.6072	0.109994	0.416353
btd	1.69038	0.600385	1.67204	0.277277	1.84673	1.04138	0.870223	2.17077	1.80847	1.86421	-0.328153	0.789783	0.672934	0.414268	0.819679
Btd	0.338075	0.200128	0.418009	0.554554	0	0.260345	0	0.271347	0.516706	0.559264	-0.0711397	-0.630858	0.00706188	0.933221	1
Bteb2	0	0	0	0	0	0	0	0	0	0	0	-1.29099	0	1	1
BthD	0	0	0.209004	0	0	0	0	0.81404	0	0.745686	-2.32363	0.369734	2.7902	0.0986014	0.399348
Btk29A	37.5264	33.4214	31.1417	33.5505	31.0866	33.0638	26.9769	28.7628	30.2273	26.4718	0.201866	5.25116	3.6753	0.0584995	0.29341
btl	15.5515	13.2085	13.7943	16.0821	12.0037	14.5793	9.3549	12.2106	12.4009	10.0668	0.27962	3.50501	3.13732	0.0800144	0.35749
btn	0	0	0	0	0	0	0	0	0	0	0	-1.26416	0	1	1
btsz	333.511	312.801	306.819	328.296	305.018	248.89	143.804	221.419	278.246	249.991	0.474285	7.99335	34.8959	6.57067e-08	3.63345e-05
btv	4.90209	4.2027	2.92606	4.15916	5.84798	3.38448	1.52289	4.6129	4.13364	4.10127	0.30736	2.29957	0.796916	0.374475	0.773791
btz	38.0335	41.6267	42.4279	39.3734	56.0175	56.7552	38.0723	51.8272	54.7708	57.9771	-0.259407	5.59632	4.79875	0.031149	0.203686
Bub1	23.8343	21.6139	22.3635	24.6777	23.6997	19.2655	16.7518	28.2201	23.5101	26.099	0.0284584	4.68366	0.0529769	0.818501	1
Bub3	14.7063	15.4099	14.8393	16.3594	16.6206	15.881	22.1907	16.5522	13.6927	13.9816	-0.0839266	4.11139	0.328095	0.568258	0.971985
BubR1	6.25439	5.6036	8.56918	5.26827	8.92586	6.24828	4.35112	8.95445	3.35859	10.2532	0.0409372	3.15569	0.0245756	0.875792	1
Buffy	24.8485	21.4137	23.6175	21.0731	21.5452	22.3897	25.0189	19.537	24.5435	19.7607	0.0200587	4.19936	0.02399	0.877268	1
bun	612.592	597.383	584.795	598.087	557.712	514.962	459.913	590.179	550.033	575.11	0.133439	9.21542	3.4442	0.0668531	0.317956
bur	92.1255	87.6563	100.322	88.4514	80.9483	92.6828	99.6406	87.3737	92.7486	97.4984	-0.0634546	6.51203	0.701923	0.404429	0.809827
Burs	0	0	0	0	0	0	0	0	0	0	0	-1.24941	0	1	1
bves	107.339	100.865	90.4989	105.088	87.4119	70.8138	83.759	84.9316	79.3143	84.4489	0.285011	6.65787	9.89684	0.00226527	0.037368
bw	37.8644	37.424	33.6497	40.4825	29.8555	33.8448	33.0685	35.0037	39.0113	28.3361	0.0886368	5.4188	0.498742	0.481936	0.895476
bwa	67.1079	62.2399	66.6724	67.3784	57.5564	55.1931	64.3965	49.3851	47.0202	52.9437	0.254836	6.02223	5.87476	0.0174261	0.141843
Bx	95.6753	95.4613	96.7691	86.7878	88.643	78.1035	58.5225	84.9316	78.0225	84.8217	0.27104	6.40274	11.1829	0.00121854	0.0249949
Bx42	27.3841	32.8211	33.4407	37.4324	35.3957	41.9155	35.0265	40.702	45.2117	41.7584	-0.302053	5.24679	4.74637	0.0320588	0.207286
bxd	0	0	0	0	0	0	0	0	0	0	0	-1.29076	0	1	1
by	150.443	136.888	131.464	135.866	144.045	129.131	114.217	117.222	138.994	126.021	0.159807	7.03783	5.6288	0.0198674	0.154425
byn	0.169038	0	0	0	0	0	0	0	0	0	1.43716	-1.21322	1.64758	0.248344	0.613612
bys	13.0159	13.8089	11.4952	14.1411	16.9284	16.9224	14.1411	17.9089	16.0179	19.2014	-0.288915	3.85998	3.24372	0.0751558	0.343605
Bzd	22.1439	19.8127	19.4374	20.2412	25.5464	23.431	25.6716	23.0645	23.7685	27.9632	-0.216091	4.29684	3.12044	0.0808166	0.359835
c11.1	104.465	96.8622	91.126	87.3423	91.4131	103.617	60.0454	85.2029	109.542	94.5157	0.0597589	6.56386	0.545403	0.462186	0.874941
c12.1	17.918	18.8121	17.1384	23.5686	20.0062	23.6914	27.1945	21.7077	24.2852	21.8113	-0.291266	4.51561	6.00088	0.0162988	0.136592
c12.2	36.6812	37.0238	36.7848	36.046	44.9371	49.4655	31.5456	39.888	40.0447	42.3177	-0.0880898	5.24462	0.467337	0.496028	0.909766
C15	0.845188	2.60167	2.09004	2.4955	1.53894	2.60345	0.870223	1.35673	2.06682	1.67779	0.153967	1.10264	0.185156	0.668041	1
C1GalTA	60.5155	58.4375	53.7142	51.019	61.5577	59.8793	62.0034	66.7513	62.7797	63.1969	-0.140759	5.83065	4.04546	0.0473792	0.259216
c(2)M	0.169038	0	0.209004	0.277277	0	0	0	0.542694	0.258353	0.186421	-0.440409	-0.302006	0.146483	0.702945	1
c(3)G	12.6778	10.6068	10.0322	8.87287	8.92586	8.07069	9.13734	12.482	10.3341	5.77906	0.185153	3.28219	0.791549	0.376081	0.775959
C3G	197.605	201.729	182.67	174.685	186.827	168.183	108.125	182.074	168.188	179.897	0.227412	7.45446	9.53315	0.0027061	0.0420637
C901	0.338075	0.400257	0.627013	0.831832	1.23115	1.04138	0.435112	1.08539	2.06682	0.559264	-0.629119	0.409203	1.54179	0.217682	0.613612
ca	130.328	139.289	131.464	133.925	125.578	138.503	67.2247	130.246	136.152	155.103	0.0752823	6.92349	0.789338	0.376745	0.776947
Ca-alpha1D	655.528	681.637	595.245	644.947	620.193	502.726	230.392	499.007	554.167	561.688	0.445783	9.11176	17.8568	5.84195e-05	0.00318301
Ca-alpha1T	920.072	1002.64	867.578	945.793	860.884	741.723	267.376	814.583	806.836	888.112	0.385856	9.78961	11.06	0.00129221	0.0258551
Ca-beta	316.269	317.804	283.619	304.45	271.469	239.257	166.865	309.064	253.186	294.359	0.242866	8.16195	5.87794	0.0173967	0.141672
CaBP1	52.2326	48.231	70.0165	41.8689	49.2461	48.9448	64.6141	46.129	47.0202	46.6054	0.0484523	5.5527	0.125678	0.723812	1
cac	481.926	542.348	473.395	520.172	468.762	344.697	238.006	384.227	371.253	389.621	0.525416	8.93491	25.2759	2.62825e-06	0.000438474
cact	129.483	125.28	129.792	127.27	137.889	139.805	118.785	135.945	145.969	126.767	-0.038179	7.15203	0.170131	0.681008	1
cactin	12.3397	12.6081	14.0033	12.4775	14.7738	19.7862	12.6182	14.9241	19.8932	21.0656	-0.420241	3.95013	3.01183	0.0861923	0.375355
cad	0.845188	1.00064	0.418009	1.38639	0.923365	1.04138	1.08778	1.35673	0.775058	0.932107	-0.201585	1.36677	0.0852768	0.770997	1
Cad74A	9.63515	11.8076	9.61421	11.9229	8.31028	7.81035	6.96179	8.41175	8.00894	8.38896	0.375464	3.10794	5.30944	0.0235876	0.170949
Cad86C	13.354	15.2098	10.2412	14.6957	14.1583	13.0172	8.70223	15.1954	12.4009	13.6088	0.104465	3.96245	0.392306	0.532726	0.942954
Cad87A	102.606	105.067	96.7691	95.9379	98.4922	97.1086	59.8278	81.9467	91.4569	105.515	0.194993	6.466	5.90826	0.0171189	0.140104
Cad88C	2.02845	1.60103	3.34407	1.38639	0.923365	0.781035	2.39311	1.62808	1.80847	1.49137	0.219565	0.938797	0.384833	0.536646	0.945815
Cad89D	2.53556	3.60231	2.29905	4.99099	2.15452	4.68621	2.39311	2.17077	3.87529	3.16916	-0.0690086	1.75696	0.0444171	0.833571	1
Cad96Ca	32.1172	33.0212	32.6047	26.0641	29.8555	26.2948	27.6296	30.9335	22.735	24.0484	0.228663	4.81902	4.75121	0.0319735	0.207054
Cad96Cb	2.19749	1.4009	1.25403	2.77277	1.84673	0.52069	1.52289	0.81404	1.55012	2.23706	0.448948	1.059	1.34365	0.249556	0.614714
Cad99C	45.133	45.229	38.2478	41.037	44.3215	42.4362	26.7594	39.6166	44.4367	37.0979	0.172445	5.27878	2.23647	0.1384	0.479001
CadN	384.223	384.247	332.317	339.942	322.562	278.829	156.205	268.091	321.908	290.258	0.423777	8.29205	15.5929	0.000158856	0.00637744
CadN2	84.6879	93.46	79.8397	90.1151	93.2598	69.5121	44.1638	80.59	81.6395	84.4489	0.292156	6.29508	10.2223	0.00193386	0.0335557
Caf1	27.3841	25.8166	25.0805	19.6867	33.2411	27.0759	32.4158	32.0189	28.1605	29.641	-0.188727	4.79206	1.78317	0.185237	0.573789
Caf1-105	4.73305	4.40283	4.18009	4.71371	7.07913	5.98793	5.22134	7.32636	5.94211	7.64328	-0.37681	2.72014	1.24629	0.26733	0.639901
Caf1-180	1.18326	2.60167	2.50805	3.88188	3.38567	2.60345	2.17556	4.0702	2.32517	3.91485	-0.214295	2.46432	0.176385	0.675532	1
cag	12.6778	12.6081	10.0322	10.2593	12.3115	13.0172	15.8816	9.49714	10.3341	12.1174	-0.0746745	3.58228	0.284028	0.595429	0.98927
CAH1	229.722	217.339	226.77	228.754	207.757	299.397	302.62	290.341	296.589	299.952	-0.422972	7.83682	39.5075	1.25322e-08	1.16459e-05
CAH2	180.363	204.932	153.618	184.667	133.888	140.847	179.266	150.055	177.488	158.458	0.0901136	7.41991	0.820853	0.367428	0.764139
CAHbeta	10.4803	8.80565	20.0644	8.31832	13.2349	15.1	16.9694	14.3814	10.3341	7.45686	-0.0670548	3.83648	0.111118	0.739675	1
cal1	24.1724	27.0173	26.5436	28.8368	25.2386	24.2121	25.6716	28.7628	32.0357	29.641	-0.092006	4.86139	0.363874	0.547929	0.953903
CalpA	124.581	127.282	123.731	118.397	127.424	120.019	136.625	122.92	117.809	134.783	-0.0253839	7.00248	0.141872	0.707342	1
CalpB	77.2502	80.6518	72.3156	72.9239	69.2524	82.5293	73.0988	64.0378	78.2809	78.8563	-0.0160334	6.29702	0.0563479	0.847646	1
CalpC	8.78996	5.80372	8.56918	8.59559	8.00249	6.76897	6.09156	5.69828	9.3007	9.50749	0.0795032	3.2913	0.230538	0.675699	1
Cals	744.949	689.643	575.807	651.879	485.69	281.172	386.597	328.601	337.15	325.678	0.924199	9.10136	23.648	5.08184e-06	0.000702512
Calx	542.273	523.736	451.659	489.672	477.072	411.085	276.949	422.216	413.881	438.463	0.340468	8.95314	13.8563	0.000349083	0.0110589
calypso	12.1707	12.6081	10.6592	13.3093	15.3894	15.881	14.3587	12.482	14.2094	17.3372	-0.225017	3.74234	2.37981	0.126535	0.454001
Cam	3076.82	3215.46	2908.51	3108.83	3135.75	2249.38	2744.25	2943.57	2339.38	2648.3	0.257004	11.4915	5.609	0.020079	0.155563
CaMKI	592.646	558.158	617.19	531.263	500.772	369.169	521.699	430.356	417.756	383.282	0.400084	9.11899	11.422	0.00108737	0.0232588
CaMKII	753.063	720.863	645.197	681.547	617.731	441.285	593.927	547.849	480.278	559.637	0.382123	9.60651	4.93445	0.0289173	0.193635
Camta	250.852	243.356	227.188	242.063	216.683	167.662	107.037	185.059	199.19	208.606	0.444447	7.66584	18.9262	3.6766e-05	0.00244042
can	0.507113	0	0.209004	0.277277	0.307788	0	0.217556	0.271347	0.516706	0	0.422007	-0.23872	0.234615	0.629337	1
cana	24.0033	22.4144	22.5725	22.4595	24.3153	20.0466	16.0991	20.8937	27.6437	18.4557	0.171503	4.62962	1.05669	0.306815	0.691343
CanA1	20.6226	22.6145	18.1834	23.5686	24.0075	15.881	14.5762	17.6375	11.6259	15.473	0.530356	4.25443	13.3863	0.00043336	0.0129443
CanA-14F	160.248	152.698	142.75	151.116	141.89	120.54	79.1903	128.076	133.827	142.053	0.311297	7.30728	7.93634	0.00599272	0.0709617
CanB	171.066	183.718	171.593	178.844	152.971	146.574	203.197	174.476	148.294	159.017	0.0456499	7.33649	0.32157	0.572123	0.975625
CanB2	91.2803	94.2605	79.8397	95.1061	86.4885	80.9673	103.774	83.8462	67.4301	87.8045	0.075211	6.6123	0.965303	0.328573	0.72155
Cand1	59.1632	67.4433	55.5952	64.051	61.2499	61.7017	55.0416	62.9525	58.9044	63.5697	0.0247869	5.87151	0.112031	0.738648	1
Cap	34.6527	47.4304	41.8009	51.5736	62.1732	50.2466	44.1638	65.9373	57.096	63.1969	-0.248821	5.59466	2.15314	0.145878	0.494247
CAP	544.977	526.738	475.694	552.336	536.475	580.309	353.746	554.633	574.06	584.245	-0.00581216	8.98902	0.00554601	0.940806	1
Ca-P60A	4173.71	3738.4	3234.34	4004.44	3559.88	3363.66	3472.63	3395.91	2930.24	3695.43	0.150435	11.7682	0.673909	0.413931	0.819679
Capa	66.6008	74.0475	80.0487	76.5285	69.2524	85.9138	101.381	72.7209	68.4635	93.2107	-0.204809	6.06979	1.90064	0.171534	0.547701
CapaR	1.52134	0.600385	1.25403	0.831832	2.15452	1.04138	1.30533	1.08539	1.80847	1.49137	-0.107886	0.856006	0.0655611	0.798516	1
Cap-D2	4.90209	3.20205	3.34407	4.43644	4.30904	3.12414	1.08778	6.24098	5.16706	3.16916	0.128352	2.23112	0.105957	0.745575	1
Cap-D3	13.523	11.4073	13.5853	13.032	13.8505	16.1414	13.9236	15.4668	17.568	13.6088	-0.227204	3.95814	4.14566	0.059621	0.29702
Cap-G	18.4251	16.8108	20.4824	26.0641	23.6997	26.2948	17.4045	27.9487	27.3854	23.6755	-0.224366	4.49372	2.13742	0.147339	0.497987
Cap-H2	55.1063	62.0398	44.0999	57.9509	59.0953	50.2466	47.2096	49.9278	40.8197	55.3672	0.189125	5.74744	5.19574	0.0250841	0.177405
Capr	106.832	105.868	109.309	113.684	107.418	122.622	70.7056	108.539	114.45	121.547	0.0142037	6.74775	0.0111471	0.916158	1
caps	106.325	106.869	108.682	106.474	93.8754	89.5586	65.2667	86.5596	101.274	87.4316	0.28206	6.57661	9.35714	0.0029505	0.0445424
Caps	960.134	939.203	864.443	913.906	780.243	535.269	552.374	666.156	641.49	654.712	0.547715	9.5513	22.4229	8.40939e-06	0.000943265
capt	173.771	182.717	172.638	180.507	214.836	192.135	164.69	190.757	199.19	196.675	-0.0302198	7.39815	0.196176	0.658923	1
capu	117.143	111.672	156.753	171.912	148.046	146.574	65.0492	128.89	126.076	138.698	0.219625	6.91229	4.4891	0.0369567	0.227856
car	33.9766	30.0193	32.6047	32.4414	25.5464	27.5966	28.2823	31.4762	28.9355	30.946	0.0742359	4.97047	0.515004	0.4749	0.888153
cas	0.169038	0	0	0	0	0	0	0	0	0	1.44221	-0.292473	1.21909	0.272884	0.647176
Cas	29.7506	28.6184	26.9616	25.7868	24.6231	24.7328	23.7136	26.3206	34.1026	21.0656	0.0725812	4.78944	0.120543	0.729283	1
CASK	368.84	413.866	397.736	398.447	368.73	375.678	215.38	394.538	405.355	405.28	0.117066	8.45988	1.63689	0.204148	0.60859
casp	56.1205	64.0411	62.0743	57.3964	71.7147	68.9914	69.8354	68.3794	65.6216	68.9759	-0.136987	6.01221	3.31335	0.072151	0.334963
Cat	177.997	178.114	183.088	180.507	168.36	181.46	191.449	177.461	145.969	137.765	0.0912132	7.71688	0.550596	0.460069	0.872217
cathD	333.342	332.613	371.192	316.096	339.798	343.135	452.299	361.163	333.792	350.845	-0.121128	8.41005	1.45951	0.230275	0.613612
cato	0	0	0	0	0	0	0	0	0	0	0	-1.30545	0	1	1
Catsup	27.5531	33.4214	35.5308	32.1642	30.471	37.4897	45.0341	33.1043	39.0113	34.1151	-0.247087	5.30721	5.25875	0.0242428	0.173629
caup	13.8611	13.4086	11.0772	15.2502	12.9271	14.8397	9.13734	12.2106	12.6593	13.9816	0.081417	3.59455	0.227743	0.634397	1
cav	2.36653	3.60231	5.01611	4.71371	2.46231	4.68621	6.52667	4.0702	3.35859	4.84696	-0.384158	2.49615	1.87052	0.174931	0.555127
caz	78.0954	76.2489	72.9426	62.9419	80.6405	72.6362	66.137	82.2181	57.6127	86.4995	0.0220489	6.24674	0.0695845	0.792565	1
cbc	16.3967	11.6074	18.1834	19.4094	17.5439	18.4845	18.0571	14.6527	18.0847	17.71	-0.0735661	3.99805	0.316555	0.57513	0.979055
Cbl	109.705	111.271	98.2321	102.315	90.7975	95.2862	70.7056	99.3129	96.8823	98.4305	0.155691	6.61251	4.43665	0.0380499	0.23102
CBP	4.90209	4.60295	5.43412	5.82282	2.46231	2.86379	2.61067	1.62808	2.32517	2.79632	0.921727	2.72876	5.7943	0.018188	0.145495
Cbp20	19.1013	16.4105	14.8393	15.8048	15.6972	19.0052	24.1487	23.3358	14.9845	18.4557	-0.283023	3.99989	4.76784	0.0316826	0.206047
Cbp53E	423.946	452.09	403.17	459.448	367.191	299.397	376.372	405.935	326.816	375.453	0.239345	8.77543	5.99334	0.016364	0.136653
Cbp80	38.8787	36.4234	36.9938	39.0961	43.3981	36.969	36.1143	36.0891	41.0781	39.5213	0.0346099	5.32311	0.169586	0.747517	1
cbs	41.5833	37.6241	38.2478	39.3734	55.7097	54.1517	48.5149	56.4401	51.4122	56.4857	-0.334588	5.50802	5.84742	0.0176811	0.142738
Cbs	55.9515	59.6383	66.8814	55.7327	83.7184	76.8017	70.2705	73.8063	66.655	78.8563	-0.191064	5.67539	1.95467	0.165631	0.535863
cbt	84.3498	81.2521	98.4411	89.5605	81.8717	87.7362	105.079	89.0018	92.2319	89.1094	-0.0890365	6.62421	0.837016	0.362775	0.758328
cbx	29.4125	30.4195	25.9166	24.1231	28.0087	29.419	38.0723	23.6072	23.2517	23.8619	-0.00243044	4.76672	0.000608202	0.980381	1
Cby	0	0	0.209004	0.554554	0	0	0.435112	0.271347	0.258353	0.372843	-0.902251	-0.394328	0.932714	0.33683	0.727082
CCAP	2.19749	2.00128	2.09004	1.66366	1.84673	1.56207	1.958	1.35673	2.58353	2.42348	-0.0121047	1.23557	0.00121682	0.972253	1
CCAP-R	3.71883	6.40411	3.97109	3.6046	2.46231	2.60345	5.00378	2.71347	2.84188	3.91485	0.24191	2.01276	0.76514	0.384128	0.784869
CCDC151	0	0.200128	0	0	0	0	0	0	0	0.186421	-0.0360426	-0.797355	0.00096906	0.975241	1
Ccdc56	0	0	0	0	0	0	0	0	0	0	0	-1.30545	0	1	1
CCHa1	3.38075	3.20205	5.22511	4.43644	3.07788	6.50862	7.3969	7.59771	5.16706	5.03338	-0.705353	2.399	7.52617	0.0073809	0.0811705
CCHa1-R	10.4803	13.6087	11.9133	13.032	9.54144	8.59138	11.9656	7.05502	8.00894	11.3717	0.306142	3.47898	2.95571	0.0891237	0.37624
CCHa2	22.482	15.0096	55.8042	19.4094	22.4685	12.4966	33.7211	26.3206	25.0602	13.2359	0.296388	5.21891	0.942584	0.3343	0.724507
CCHa2-R	7.09958	10.4067	7.73317	7.20921	11.0804	8.07069	8.70223	7.59771	6.45882	9.69391	0.0864082	2.9004	0.200251	0.717018	1
Cchl	114.1	120.477	123.104	145.016	124.654	146.835	154.247	142.728	142.611	147.459	-0.22771	7.05747	4.94204	0.0287976	0.193298
CCKLR-17D1	13.8611	11.2072	10.2412	13.5866	14.1583	9.37242	7.61445	12.482	14.9845	13.9816	0.104434	3.59733	0.465179	0.497022	0.910789
CCKLR-17D3	17.5799	14.2091	12.5403	18.8549	15.0816	17.4431	13.2709	13.8387	16.5346	18.0829	-0.0204498	3.97766	0.0193952	0.889561	1
Ccm3	61.3607	59.6383	54.3412	60.4464	49.8617	45.0397	61.7858	52.6413	47.7953	47.351	0.167282	5.98781	2.14197	0.146914	0.497032
Ccn	53.754	66.2425	56.6402	63.4965	62.1732	60.1397	56.5645	56.7115	50.3788	68.4167	0.0454036	5.85112	0.26868	0.726206	1
Ccp84Aa	1.69038	6.20398	0.209004	1.10911	0.307788	0.260345	0.435112	0.271347	1.03341	0	2.29903	0.501346	6.41991	0.0130723	0.118772
Ccp84Ab	1.69038	3.80244	1.88104	1.10911	0.307788	0.52069	1.08778	1.08539	1.03341	0.559264	1.09552	1.31987	1.88681	0.173085	0.550835
Ccp84Ac	0	0	0	0	0	0	0	0	0	0	0	-1.24106	0	1	1
Ccp84Ad	0	0	0	0	0	0	0	0.271347	0	0	-1.52621	-1.04854	1.04085	0.311777	0.698525
Ccp84Ae	0	0	0	0	0	0	0	0.271347	0	0.186421	-2.22759	-1.17294	2.89494	0.0949271	0.389273
Ccp84Af	0	0	0	0	0	0	0	0	0	0	0	-1.29805	0	1	1
Ccp84Ag	2.7046	2.8018	1.46303	3.6046	0.615577	3.64483	3.916	3.52751	3.87529	4.84696	-0.801598	1.99316	6.1139	0.0153536	0.131366
Ccs	11.4946	13.2085	11.2862	14.6957	12.0037	14.8397	18.2747	14.9241	15.5012	12.6767	-0.284215	3.73568	3.79525	0.0546155	0.281856
Cct1	140.808	139.89	159.47	145.571	156.664	158.81	122.484	154.939	144.419	168.711	-0.014061	7.25654	0.0373431	0.847218	1
Cct2	56.9657	69.6447	74.1966	77.0831	82.1795	102.055	110.736	94.9714	88.8733	88.923	-0.435216	6.12131	15.7668	0.000146956	0.00608447
Cct5	33.8075	34.8223	35.7398	36.3233	40.6281	45.3	43.2936	37.1745	46.7618	42.8769	-0.252226	5.46661	2.7181	0.102816	0.400139
Cctgamma	35.3289	37.424	36.1578	33.5505	40.6281	46.8621	28.7174	37.4459	42.1115	42.1312	-0.107681	5.33523	0.474654	0.492683	0.907212
c-cup	0	0	0	0	0	0	0	0	0	0	0	-0.936187	0	1	1
Ccz1	17.918	19.8127	18.8104	16.6366	17.2361	18.7448	22.1907	18.7229	20.1515	21.0656	-0.156916	4.2839	1.7281	0.192102	0.587233
cd	12.0017	10.2065	10.4502	11.0911	3.69346	11.7155	12.6182	7.32636	10.0758	9.69391	-0.092805	3.77093	0.22932	0.665785	1
CD98hc	386.589	393.653	393.137	392.625	387.505	441.285	483.627	405.121	421.632	444.242	-0.168892	8.64963	7.90815	0.0060788	0.0716057
Cda4	1.01423	0.800514	1.46303	0.831832	2.15452	1.04138	0.652667	1.62808	0.258353	0.559264	0.581464	0.982132	1.11581	0.29374	0.674453
Cda5	112.579	118.676	117.67	116.456	101.57	89.0379	64.8316	89.0018	90.9402	90.9736	0.417886	7.14121	14.5991	0.000248716	0.00875847
Cda9	1.52134	0.600385	0.418009	1.10911	1.84673	0.781035	0.870223	0.542694	1.80847	1.67779	-0.0978975	0.636625	0.0334337	0.855341	1
CDase	55.4443	52.4336	47.862	63.4965	56.3253	74.4586	77.4499	84.3889	79.0559	94.7021	-0.57659	5.87697	34.6002	7.32419e-08	3.63345e-05
cdc14	115.453	105.668	110.354	100.652	106.495	108.564	87.0223	109.624	106.183	109.057	0.0507911	7.02542	0.509254	0.477368	0.890579
Cdc16	16.5657	18.4118	17.5564	16.6366	14.1583	11.4552	15.8816	13.5673	13.176	14.5409	0.280346	3.89474	3.81327	0.0540564	0.280025
cdc2	0	0.200128	0.836018	1.38639	0.307788	0.781035	0.652667	0.81404	0.258353	1.30495	-0.622908	1.39423	0.493093	0.484422	0.898385
Cdc23	4.0569	5.00321	5.22511	5.26827	4.00125	4.94655	5.87401	5.69828	6.45882	6.33833	-0.317403	2.47053	1.55313	0.216012	0.613612
Cdc27	46.6544	48.6312	53.9232	53.7918	47.3994	58.3173	43.5112	52.0986	55.5458	55.5536	-0.081761	5.59861	0.654017	0.420882	0.82737
cdc2c	8.28284	9.60616	8.15118	10.8138	10.157	10.9345	10.4427	7.05502	10.5925	11.5581	-0.121761	3.31233	0.240147	0.625331	1
cdc2rk	15.2134	12.2078	11.9133	11.9229	11.696	10.6741	18.2747	12.2106	10.8508	14.168	-0.0727462	3.68698	0.300306	0.585091	0.986409
Cdc37	23.8343	26.417	26.5436	29.6687	40.6281	36.1879	46.1218	34.1897	34.6193	41.3856	-0.403835	5.15592	4.68668	0.0331301	0.211421
Cdc42	100.577	109.67	101.158	103.147	98.1845	97.8897	124.877	101.484	95.5905	101.227	-0.0235446	6.67131	0.135234	0.713958	1
CDC45L	10.1423	13.8089	11.7043	11.3684	14.1583	12.4966	9.3549	13.0246	12.1426	14.168	-0.00752372	3.87373	0.00129247	0.971404	1
Cdc5	23.4962	25.2162	21.3185	24.1231	30.1632	29.1586	15.8816	26.0493	30.2273	27.9632	-0.0594731	4.67973	0.126992	0.722433	1
Cdc6	0.507113	0.200128	0.209004	0	0.923365	0	0.217556	0.81404	0.258353	0.559264	-0.0632619	0.96099	0.0041061	0.949054	1
Cdep	411.776	440.082	404.633	430.889	380.734	353.548	214.945	361.163	424.99	390.926	0.244998	8.58972	6.49774	0.0125508	0.114971
CdGAPr	77.9263	77.85	75.8686	81.7968	72.9458	80.4466	42.4234	77.6052	87.3232	77.5513	0.082968	6.32206	0.769459	0.382796	0.78345
cdi	119.679	125.28	112.235	109.525	107.418	116.114	70.9232	101.212	126.335	112.226	0.126132	7.01822	1.78737	0.184725	0.572777
Cdk12	61.3607	67.2432	66.4634	63.2192	64.9433	68.731	49.3852	67.0227	67.9468	67.1117	0.0145196	5.94411	0.0401027	0.841746	1
Cdk4	20.7916	17.4112	17.5564	14.973	13.2349	13.5379	18.7098	19.537	12.4009	13.9816	0.117551	4.35087	0.611633	0.436293	0.845836
Cdk5	19.4393	21.4137	20.6914	20.7958	18.4673	22.9103	33.286	26.8633	18.0847	21.6249	-0.283767	4.57173	6.94932	0.00992546	0.0981526
Cdk5alpha	215.523	238.953	213.603	248.995	212.989	206.974	239.529	231.187	225.542	231.349	-0.00607776	7.77097	0.00982021	0.921289	1
Cdk7	7.94477	9.20591	9.61421	8.04104	7.69471	6.76897	7.83201	8.1404	8.26729	8.38896	0.111445	3.21356	0.323212	0.571145	0.974355
Cdk8	3.21172	3.00193	3.13507	5.82282	4.61682	4.94655	6.30912	4.34155	6.71717	3.35559	-0.397975	2.2188	2.26691	0.135778	0.473751
Cdk9	15.0443	18.6119	21.3185	21.6276	24.6231	20.8276	25.6716	24.9639	24.5435	18.0829	-0.180898	4.40825	2.1469	0.146456	0.495704
Cdlc2	0	0	0	0	0	0	0	0	0	0	0	-1.29815	0	1	1
cdm	180.532	194.125	185.178	183.835	207.449	174.952	163.82	180.174	189.373	189.218	0.0831053	7.26105	2.26644	0.135818	0.47379
CdsA	1013.72	1008.65	926.099	945.515	792.863	670.648	861.739	687.864	722.613	700.572	0.363442	9.74586	12.596	0.000625462	0.0160643
CecA1	0	0	0	0.277277	0.307788	0	0	0	2.06682	0	-1.81613	2.34376	0.328448	0.56805	0.971985
CecA2	0.169038	0	0	0	0	0.260345	0	0	0	0	-0.0616936	1.58751	0.000280541	0.986675	1
CecB	0	0.400257	0.627013	0	0.307788	0	0	0	1.29176	0	0.147888	0.624845	0.00669422	0.935021	1
CecC	0	0	0.209004	0	0	0.781035	0	0	3.87529	0	-3.67876	2.00865	1.9225	0.169286	0.543086
Ced-12	26.877	29.619	28.6336	27.4504	25.5464	29.6793	26.9769	37.7172	28.6772	38.4028	-0.224312	4.80813	4.9244	0.0290767	0.194313
ced-6	141.484	127.082	138.988	117.011	124.962	142.148	144.675	147.613	147.003	129.376	-0.128344	7.42472	2.71356	0.103099	0.400766
Cen	66.9389	75.8487	75.8686	80.6877	80.0249	78.3638	91.8085	94.4287	78.7976	89.6687	-0.19346	6.2983	3.24022	0.0753104	0.343943
CenB1A	59.5012	58.6376	56.0132	56.2873	71.7147	65.8673	47.4272	62.6811	64.5882	67.8574	-0.0315937	5.98421	0.143809	0.705445	1
CenG1A	117.819	115.874	112.444	123.943	124.039	107.522	85.4994	112.338	119.101	115.022	0.138845	6.85928	3.34943	0.0706458	0.330291
Cenp-C	6.25439	5.80372	2.71706	4.99099	5.2324	9.37242	6.30912	4.88424	7.75058	7.45686	-0.510015	2.96348	3.2724	0.0739019	0.339884
Cep135	6.08535	10.6068	8.98719	11.3684	11.0804	9.63276	13.4885	13.5673	8.78399	9.13465	-0.198417	3.4614	0.990325	0.322417	0.713275
Cep89	0	0	0	0	0	0	0	0	0	0	0	-1.2483	0	1	1
Cep97	44.2879	42.2271	43.4729	49.3553	48.6305	55.1931	45.0341	55.8974	52.1873	49.4017	-0.17788	5.50172	2.77732	0.0991974	0.399724
cer	17.5799	15.2098	21.1095	16.0821	19.6984	20.0466	38.0723	23.3358	15.7595	24.794	-0.452165	4.551	8.91673	0.00366765	0.0514357
Cerk	85.0259	82.8532	83.8108	77.0831	83.1028	82.269	76.7972	90.0871	79.0559	82.3983	0.00555827	6.436	0.00778764	0.929882	1
cert	45.9782	53.4343	42.4279	48.8008	46.1682	41.9155	45.0341	43.4155	47.0202	46.0461	0.0832878	5.59057	1.20841	0.274674	0.649659
cerv	12.5088	14.6094	15.8843	16.6366	14.1583	15.6207	17.622	16.0095	12.4009	16.4051	-0.0880841	3.82754	0.52502	0.470649	0.884058
Cf2	97.8728	90.2579	96.9781	80.6877	89.5664	85.9138	63.0912	84.9316	82.1562	79.0427	0.207345	6.55094	3.94554	0.0501369	0.267765
Cfp1	14.3682	14.2091	12.3313	16.9139	18.7751	20.3069	17.4045	19.537	16.0179	22.7434	-0.340249	4.17625	3.60771	0.0608192	0.30045
cg	233.272	247.359	226.77	234.577	230.841	225.459	161.209	243.127	232.259	242.534	0.0868303	7.79686	2.15914	0.145324	0.493188
CG10000	0.169038	0.200128	0.209004	0	0.307788	0	0	0	0	0	3.00141	-1.03165	6.11175	0.0209568	0.158617
CG10005	0.169038	0.200128	0	0.554554	0	0.260345	0	0	0.258353	0	0.761869	-0.757912	0.56252	0.455266	0.867043
CG10011	161.769	162.704	154.245	171.912	132.657	146.835	82.2361	158.195	188.081	181.947	0.0497579	7.31117	0.191836	0.662476	1
CG10013	0	0	0	0.277277	0	0	0	0	0	0	1.4844	-1.23566	1.75129	0.248344	0.613612
CG10014	0.169038	0	0	0	0	0	0	0	0	0	1.45638	2.43845	1.60078	0.248344	0.613612
CG10019	25.0176	28.018	21.7365	27.4504	29.2399	20.8276	10.0076	16.5522	13.951	19.2014	0.702835	4.36495	18.945	3.64696e-05	0.00243039
CG10026	18.087	13.6087	22.9905	14.4184	16.005	17.4431	21.7556	16.0095	16.0179	10.8124	0.0626146	3.93782	0.0858684	0.770193	1
CG10029	0	0	0	0	0	0	0	0	0	0	0	-1.29851	0	1	1
CG10031	14.8753	12.6081	34.6947	10.2593	15.0816	15.6207	34.5914	17.9089	12.6593	7.27043	0.00409274	4.59264	0.00017248	0.989552	1
CG10032	0	0	0	0	0	0	0	0	0	0	0	-1.29805	0	1	1
CG10035	1.18326	1.00064	0.627013	0	0	0	0.870223	0.81404	0.775058	0.559264	0.0410343	0.103006	0.00450326	0.946651	1
CG10038	10.4803	9.20591	13.7943	8.04104	13.2349	9.11207	15.2289	13.8387	11.1092	9.88033	-0.112775	3.57252	0.495769	0.483242	0.897234
CG10041	0	0	0	0	0	0	0.217556	0.271347	0.258353	0.186421	-3.0705	-0.747885	5.65413	0.0197074	0.153609
CG10050	4.73305	4.60295	6.89715	8.04104	3.38567	4.94655	5.00378	6.51232	6.45882	5.59264	-0.0413187	2.61481	0.0375336	0.846833	1
CG10051	0.676151	0.400257	0	0.554554	0	1.04138	0.435112	0.271347	0.516706	0.559264	-0.66653	-0.251973	0.798268	0.374072	0.773149
CG10053	4.0569	4.80308	3.13507	3.6046	6.46355	3.64483	4.56867	3.79886	4.65035	3.91485	0.0827073	2.10231	0.103079	0.770492	1
CG10055	19.9464	22.2143	20.9004	21.0731	19.3907	21.6086	23.9311	17.3662	20.9266	23.8619	-0.0602133	4.47945	0.215133	0.64393	1
CG10062	17.4109	17.4112	13.1673	14.6957	11.696	13.5379	11.5305	12.2106	11.1092	11.931	0.313112	3.60266	3.64629	0.0594833	0.296901
CG10063	0	0	0	0	0.307788	0	0	0	0	0	1.49154	-1.08449	1.47564	0.248344	0.613612
CG10064	0	0.200128	0	0	0.307788	0	0	0	0	0	2.19436	-0.831863	2.69025	0.105377	0.404992
CG10068	21.2987	24.6158	19.0194	21.6276	16.6206	20.5672	25.2365	20.8937	18.8598	24.0484	-0.0854886	4.5937	0.506791	0.478432	0.891371
CG10073	0.338075	0	0.209004	0.277277	0	0	0	0	0.258353	0.186421	0.758296	-0.417945	0.3956	0.531015	0.941393
CG10075	20.4536	19.4125	20.4824	15.8048	25.5464	22.1293	32.1983	19.537	26.352	23.3027	-0.28603	4.46526	6.18945	0.0147541	0.128337
CG10077	2865.53	2918.47	2751.54	2642.73	2759.01	2319.67	1613.18	2468.71	2194.71	2557.52	0.321447	11.2953	12.1121	0.000784687	0.0186441
CG10081	0	0	0	0	0	0	0	0	0	0	0	-1.29808	0	1	1
CG10082	394.534	397.655	418.009	409.816	465.991	390.257	274.773	431.441	401.739	431.938	0.111807	8.60236	2.95375	0.089228	0.37624
CG10086	0.169038	0	0	0	0	0	0	0	0	0	1.43772	-1.05947	1.00095	0.324783	0.71614
CG10089	75.0527	77.85	70.8525	78.1922	61.2499	49.9862	55.6943	74.349	60.9713	70.4673	0.222781	6.12206	6.13158	0.0152111	0.13075
CG10092	14.7063	16.4105	15.4663	11.6456	19.3907	13.7983	11.9656	13.296	15.7595	13.6088	0.180552	3.99127	2.58997	0.116659	0.432132
CG10096	0	0	0	0	0	0	0	0	0	0	0	-1.30545	0	1	1
CG10097	0	0	0	0	0	0	0	0	0	0	0	-1.30545	0	1	1
CG10098	45.6402	42.4272	48.071	55.1782	53.5552	43.9983	57.4347	47.757	45.9868	49.9609	-0.00733286	5.54119	0.00797993	0.929024	1
CG10103	71.1648	70.8455	65.6274	74.8649	71.7147	70.2931	91.3734	85.7456	75.1807	81.839	-0.192653	6.15732	6.07173	0.0156994	0.133248
CG10104	0	0	0	0	0	0	0.217556	0	0	0	-1.5065	-1.28358	1.84917	0.229901	0.613612
CG10116	0.338075	1.00064	1.25403	0.277277	0.307788	0.52069	0.870223	0.542694	0.516706	1.49137	-0.305385	0.183912	0.266678	0.606877	0.995152
CG10126	38.2025	35.6229	34.6947	34.1051	39.7047	37.75	49.3852	32.0189	43.1449	36.1658	-0.124062	5.26568	1.23862	0.268797	0.642007
CG10131	13.692	10.8069	10.2412	10.5365	7.38692	11.1948	22.4082	15.1954	17.8263	15.8458	-0.632373	3.58612	9.07545	0.00339036	0.048655
CG10132	123.228	132.685	123.313	136.975	144.968	151.26	82.6712	151.14	135.118	168.898	-0.0607931	6.94382	0.375187	0.541785	0.948847
CG10133	7.43766	7.00449	6.27013	7.48649	7.07913	4.68621	7.17934	6.78367	8.52564	8.20254	-0.01144	2.89973	0.00447935	0.946792	1
CG10137	86.5473	85.4548	76.2866	79.3013	87.7197	101.795	73.7514	96.0568	88.3566	97.1256	-0.137783	6.34091	3.8429	0.0531506	0.277395
CG10139	16.5657	15.2098	16.5114	11.9229	17.2361	19.5259	26.5418	22.2504	18.0847	19.7607	-0.452891	4.05346	10.976	0.00134518	0.0264468
CG10140	0.169038	0.400257	0.209004	0	0	0	0	0	0	0	2.97102	-0.91156	6.08053	0.0209568	0.158617
CG10144	25.0176	28.018	25.7076	27.7277	24.0075	25.5138	18.7098	21.9791	22.735	24.794	0.19868	4.55439	3.45658	0.0663743	0.316522
CG10147	15.0443	14.4092	11.2862	10.2593	11.3882	8.33104	10.8778	13.0246	13.176	11.5581	0.143242	3.54101	0.696052	0.406394	0.811575
CG10151	27.046	25.4163	21.9455	22.7367	27.0854	31.2414	25.2365	30.6622	25.3186	31.5052	-0.212375	4.60787	2.85318	0.0947672	0.388808
CG10154	0	0	0	0	0	0	0	0	0	0	0	-1.30545	0	1	1
CG10157	10.6494	10.6068	25.0805	8.31832	14.1583	18.4845	24.5838	20.6224	13.176	10.0668	-0.327089	3.75936	1.591	0.210548	0.613612
CG10158	19.7774	16.4105	20.0644	21.0731	20.6218	18.4845	26.3243	17.0948	14.2094	19.3878	0.0271728	4.26453	0.0469987	0.97773	1
CG10163	0	0	0	0	0	0	0	0	0	0	0	-1.22641	0	1	1
CG10164	0	0	0	0	0	0	0	0	0	0	0	-1.24807	0	1	1
CG10165	8.11381	7.00449	7.31516	4.43644	8.00249	7.28966	11.5305	5.42694	7.23388	3.91485	-0.0094885	3.10834	0.00217041	0.962948	1
CG10166	18.9322	15.2098	18.6014	15.5275	16.3128	18.2241	26.5418	19.8083	19.3765	18.6421	-0.275285	4.18526	4.76978	0.0316488	0.205908
CG10168	0	0	0	0	0	0	0	0	0	0	0	-1.28375	0	1	1
CG10170	0	0	0	0	0	0	0	0	0	0	0	-1.00613	0	1	1
CG10171	14.0301	11.2072	11.4952	10.8138	12.6193	8.59138	13.706	10.0398	13.176	8.94823	0.147863	3.79855	0.920697	0.339946	0.731353
CG10175	75.0527	55.8358	49.9521	58.5055	59.7109	42.1759	49.6027	42.6015	41.5948	48.0967	0.415988	6.0865	6.63537	0.0116812	0.109771
CG10176	26.877	20.213	17.1384	17.7457	23.6997	15.6207	18.2747	12.482	19.3765	12.6767	0.434772	4.36257	4.8426	0.0304085	0.200253
CG10177	0.845188	0.600385	0.418009	0	0.923365	0.52069	0.870223	0.542694	0.775058	0.372843	-0.105529	-0.061879	0.0310412	0.88962	1
CG10178	29.4125	17.0109	39.7109	24.4004	23.0841	23.9517	33.9387	19.2656	19.6348	16.4051	0.244048	4.86079	1.72826	0.192082	0.587233
CG10182	0.169038	0.200128	0.209004	0	0	0	0.870223	0	0.258353	0	-0.731104	-0.962565	0.448604	0.505295	0.919002
CG10183	0.169038	0	0	0	0	0	0.217556	0	0	0	-0.069054	-1.09625	0.00242149	0.969295	1
CG10184	7.94477	7.00449	12.7493	8.59559	11.3882	7.02931	13.4885	10.5825	6.97552	10.2532	-0.0382371	3.53662	0.039943	0.842058	1
CG10185	1.52134	47.2303	0.836018	15.8048	3.07788	3.64483	2.61067	4.34155	1.80847	3.54201	2.11518	4.85916	4.73609	0.0322406	0.207689
CG10186	1485.16	1631.65	1513.4	1612.37	1719.92	1811.74	1141.08	1799.57	1684.98	1937.66	-0.0729307	10.4472	0.862282	0.355665	0.749271
CG10188	110.043	114.073	116.625	125.607	112.958	119.759	81.5834	116.95	125.043	113.344	0.0579761	6.77495	0.517687	0.473755	0.887257
CG10189	18.2561	22.0141	17.9744	20.2412	15.0816	19.2655	25.454	15.4668	24.0268	20.8792	-0.166495	4.01575	1.49833	0.224226	0.613612
CG10194	14.3682	15.61	12.3313	14.973	17.5439	15.6207	18.2747	17.3662	13.4343	13.2359	-0.0629608	3.92168	0.205675	0.651306	1
CG10195	13.8611	14.009	15.8843	11.3684	10.4648	14.8397	15.0114	17.6375	10.8508	15.473	-0.158594	3.95767	1.34359	0.249568	0.614714
CG10202	0	0	0	0.277277	0.307788	0	0	0	0	0.186421	0.724174	-0.661446	0.374004	0.591775	0.986409
CG10205	73.0243	70.6453	66.0454	68.4875	92.3365	84.6121	88.1101	71.6356	82.1562	84.0761	-0.151642	6.25391	1.58782	0.211001	0.613612
CG10208	5.91632	5.00321	8.98719	5.54554	8.61807	8.33104	9.79001	6.51232	5.68376	6.15191	-0.109159	2.85512	0.34017	0.561237	0.965526
CG10209	15.8895	14.4092	15.6753	15.8048	16.6206	20.8276	15.8816	19.537	19.3765	18.4557	-0.262224	4.06542	2.59924	0.11053	0.417784
CG10211	134.047	113.473	71.2705	100.374	94.7988	93.4638	56.7821	87.1023	151.911	88.7366	0.109379	6.27049	0.527913	0.469432	0.883068
CG10214	10.3113	12.2078	12.7493	12.4775	10.4648	16.4017	18.7098	12.482	12.1426	11.931	-0.299949	3.75384	5.32744	0.0233595	0.169958
CG10217	53.4159	53.6344	46.608	46.5826	45.2449	53.8914	50.4729	54.5407	48.5703	45.3004	-0.0375702	5.68205	0.220373	0.852934	1
CG10219	193.21	205.532	167.413	203.244	169.591	165.319	232.35	157.381	164.571	170.948	0.0760143	7.37345	0.365744	0.546904	0.953025
CG10222	5.57824	6.40411	4.5981	4.71371	4.30904	5.46724	7.83201	6.78367	9.55905	6.52475	-0.481182	2.64265	4.63392	0.0341087	0.215541
CG10226	195.746	208.934	194.165	186.33	183.442	164.278	154.465	188.315	168.704	176.727	0.18492	7.25651	4.29867	0.0410939	0.241696
CG10232	1.69038	0.600385	1.25403	0.554554	3.07788	1.04138	0.217556	0.542694	1.29176	0.559264	0.950255	0.473712	2.6778	0.105362	0.404992
CG10237	192.196	164.906	121.432	163.039	163.436	167.662	168.606	150.869	131.76	139.443	0.0866668	7.20554	0.587094	0.445615	0.856589
CG1024	14.8753	10.8069	12.5403	14.1411	14.466	15.6207	14.7938	11.9393	18.0847	14.5409	-0.16879	3.9177	1.65431	0.201779	0.604169
CG10249	116.298	117.876	113.698	109.802	124.346	121.841	101.599	119.664	120.134	115.022	0.0096607	6.99613	0.0284489	0.866449	1
CG10252	0	0.200128	0	0	0	0	0	0.271347	0	0	-0.0706633	-0.981903	0.0024583	0.969295	1
CG10253	49.359	56.036	49.5341	47.4144	56.633	49.7259	40.9005	43.9582	48.312	54.4351	0.123886	5.55793	2.15934	0.145305	0.493188
CG10254	93.3088	96.662	92.171	98.7107	88.3352	87.2155	68.095	88.7304	92.4903	88.5502	0.143364	6.53951	1.59205	0.2104	0.613612
CG10257	16.5657	17.211	13.5853	17.4685	17.2361	20.3069	17.4045	18.7229	13.4343	18.0829	-0.102919	4.37351	0.60274	0.439636	0.849559
CG10262	7.26862	6.20398	10.8682	5.82282	8.61807	9.11207	11.9656	13.8387	6.71717	10.9989	-0.440768	3.19087	6.21877	0.0145281	0.126965
CG10264	0	0.200128	0	0	0.307788	0	0	0	0	0	2.19556	-1.24029	3.22226	0.102566	0.399724
CG10265	7.26862	7.00449	7.10615	9.98198	10.157	10.1535	14.5762	14.9241	8.52564	9.13465	-0.480409	3.22879	7.55396	0.00727703	0.0804513
CG10268	16.7347	20.6132	17.7654	16.3594	16.3128	10.9345	13.0533	9.76849	6.45882	12.3038	0.733539	3.15318	19.7035	2.63538e-05	0.00196795
CG10274	11.4946	15.4099	14.4213	15.2502	15.0816	13.7983	12.1831	13.8387	12.4009	15.1001	0.0814608	3.91405	0.299074	0.612213	0.996261
CG10280	0	0	0	0	0	0.260345	0	0	0	0	-1.52315	-1.24843	2.03646	0.229901	0.613612
CG10283	42.5975	50.0321	46.399	52.96	47.0916	59.619	51.9958	60.5103	57.6127	58.5363	-0.271184	5.66142	9.94733	0.00221024	0.0365684
CG10286	11.1565	10.2065	11.4952	7.76376	11.0804	13.2776	11.5305	11.3966	13.951	9.32107	-0.188856	3.60222	1.17805	0.280746	0.658542
CG10289	163.967	166.907	152.155	162.207	155.741	109.866	93.7666	122.649	134.86	122.665	0.456887	7.25068	22.2879	8.89296e-06	0.000959694
CG10298	0	0	0	0	0	0	0	0	0	0	0	-1.27746	0	1	1
CG10300	0	0	0	0	0	0	0	0	0	0	0	-1.02446	0	1	1
CG10301	0.169038	0.400257	0	0	0	0	0.217556	0.271347	0	0	0.372803	-0.950722	0.118894	0.7312	1
CG10306	79.4477	86.6556	91.544	96.4925	91.1053	121.321	150.331	115.865	114.45	115.768	-0.474286	6.796	21.9161	1.03774e-05	0.0010715
CG10307	31.272	37.0238	33.0227	39.9279	43.3981	35.6672	44.8165	42.8728	33.3275	40.6399	-0.103749	5.10287	0.489684	0.485931	0.900068
CG10311	98.0418	95.8615	91.544	79.8558	84.9496	72.1155	102.034	72.9923	64.0715	71.213	0.236279	6.19721	4.7059	0.032781	0.209846
CG10317	0.169038	0	0.209004	0.277277	0	0.52069	0	0.271347	0	0.186421	-0.440854	-0.886531	0.171789	0.679931	1
CG10320	107.846	119.477	108.055	126.161	137.274	156.988	199.716	147.884	139.51	150.815	-0.411238	6.99346	9.62125	0.00259175	0.0411701
CG10321	47.8377	49.4317	52.4601	47.6917	54.7863	57.7966	44.1638	56.7115	70.5303	63.1969	-0.213927	5.70899	4.22464	0.0428334	0.247658
CG10324	4.73305	5.00321	6.06113	6.1001	8.61807	7.02931	7.17934	9.22579	9.55905	6.89759	-0.403985	2.84345	2.32311	0.131085	0.463366
CG10326	86.7163	90.8583	92.798	92.8879	88.3352	74.4586	94.4192	90.0871	72.3388	82.5847	0.124985	6.37914	3.15897	0.0789984	0.354374
CG10332	0	0	0	0	0	0	0	0	0	0	0	-1.30545	0	1	1
CG10333	27.2151	27.8179	28.8426	29.9459	37.2424	36.7086	26.1067	40.9734	36.4277	37.6571	-0.240547	5.00522	2.93186	0.0904024	0.378608
CG10336	1.69038	1.60103	2.29905	2.21822	2.46231	0.52069	1.74045	2.17077	3.10023	1.67779	0.141532	1.26183	0.0950142	0.758632	1
CG10337	2.19749	2.60167	3.34407	2.4955	1.23115	2.86379	1.958	1.89943	2.84188	1.67779	0.113814	1.62132	0.102914	0.749128	1
CG10338	20.7916	19.4125	19.0194	16.0821	17.2361	14.319	19.7976	17.3662	16.7929	13.6088	0.184949	4.33532	2.32562	0.130879	0.463033
CG10339	9.80418	9.40604	5.22511	9.98198	7.69471	10.6741	7.83201	10.5825	7.23388	10.8124	-0.161172	3.15341	0.698175	0.405682	0.810761
CG10340	32.9623	30.4195	32.6047	41.037	39.7047	40.0931	54.389	49.6565	43.92	54.0622	-0.462841	5.26226	15.5938	0.000158795	0.00637744
CG10341	14.7063	12.6081	12.9583	13.8639	13.8505	19.7862	16.3167	19.2656	10.8508	13.2359	-0.219608	3.77181	1.89931	0.171682	0.547726
CG10343	7.77573	9.00578	6.89715	10.5365	7.69471	11.9759	17.622	14.9241	10.5925	11.1853	-0.666249	3.54069	14.2634	0.000289771	0.00976799
CG10344	4.90209	4.2027	4.8071	2.77277	3.38567	3.12414	5.22134	3.52751	2.32517	3.54201	0.189315	2.11379	0.439872	0.508934	0.922963
CG10345	99.0561	84.4542	74.1966	86.5105	96.6455	81.2276	88.1101	89.8158	53.479	63.7561	0.228598	6.47468	1.58179	0.211862	0.613612
CG10347	18.9322	23.0148	24.0355	18.3003	19.0829	21.6086	26.3243	18.4516	21.4433	18.4557	-0.0367857	4.38572	0.0911834	0.763468	1
CG10348	5.4092	5.80372	5.22511	4.43644	3.69346	2.08276	3.69845	0.81404	2.84188	3.91485	0.850773	2.47781	12.3378	0.00070577	0.0174167
CG10352	18.4251	19.2123	17.3474	11.0911	13.5427	17.4431	27.8471	19.537	14.2094	20.8792	-0.317939	4.03851	4.3883	0.0390882	0.233677
CG10353	166.333	156.1	153.409	162.484	152.663	149.698	104.209	146.799	151.395	154.543	0.163271	7.54977	5.51599	0.0211053	0.159309
CG10357	0	0.200128	0	0.277277	0	0	0	0	0	0	2.1783	1.26081	0.374063	0.542466	0.949344
CG10359	12.1707	13.8089	7.73317	7.48649	9.23365	8.59138	12.8358	7.05502	10.5925	8.38896	0.0995465	3.46047	0.280094	0.597985	0.990524
CG10361	5.57824	3.60231	7.94217	2.21822	4.61682	5.46724	8.91979	8.41175	7.49223	7.08401	-0.614373	2.997	5.05888	0.0270198	0.185992
CG10362	85.195	83.8538	81.5118	87.065	95.1066	90.3397	60.9156	94.7	91.1985	92.6514	0.00938005	6.47814	0.0145299	0.904333	1
CG10365	54.092	42.4272	50.5791	44.3644	57.8642	59.8793	48.2974	57.2542	56.5793	55.9264	-0.156783	5.61501	2.39366	0.125451	0.451174
CG10366	17.2418	20.8134	24.2445	19.964	25.2386	21.3483	21.1029	21.1651	22.4767	20.5064	0.00686311	4.43305	0.00284908	0.957554	1
CG10375	18.4251	19.0122	19.0194	25.2322	25.5464	17.9638	31.328	24.6926	22.9934	23.3027	-0.179538	4.40598	1.94671	0.166486	0.536782
CG10376	35.3289	34.0218	31.5597	31.8869	33.5489	34.8862	37.6372	31.2049	28.1605	33.9287	0.00386081	5.08569	0.0015783	0.977528	1
CG10383	29.0745	32.4208	38.2478	37.4324	39.3969	38.7914	33.5036	31.2049	34.1026	34.6744	0.0296385	5.54183	0.0211568	0.884688	1
CG10384	104.972	116.675	112.026	113.406	103.417	114.031	77.0148	118.307	105.15	123.597	0.0333278	6.76053	0.154043	0.695659	1
CG10395	16.9038	19.6126	15.6753	17.1912	15.6972	12.2362	12.8358	13.0246	18.8598	10.9989	0.3327	4.07598	3.93136	0.050542	0.268898
CG10396	0	0.400257	0.418009	0	0	0.260345	0	0.542694	0	0.186421	-0.0985515	-0.744841	0.00989588	0.938636	1
CG10399	4.90209	4.80308	4.5981	4.43644	3.69346	3.90517	7.61445	2.98482	5.68376	4.66054	-0.146226	2.25751	0.335313	0.564041	0.968178
CG10405	0	0	0	0	0	0.260345	0	0	0	0	-1.52259	-0.89003	1.19998	0.276822	0.653089
CG10407	7.94477	7.40475	8.56918	5.26827	6.15577	6.24828	9.13734	8.6831	7.23388	6.52475	-0.080183	2.8238	0.107743	0.743515	1
CG1041	31.1029	26.2168	37.2028	27.1732	27.3932	28.6379	31.7631	25.7779	24.5435	26.6583	0.1203	4.94796	1.15683	0.285091	0.663058
CG10413	100.746	96.4619	100.322	97.8789	66.4823	77.3224	76.5796	68.9221	75.439	73.0772	0.317783	6.50155	8.08968	0.00554621	0.0675193
CG10417	121.707	116.675	112.862	102.038	99.4156	82.269	112.911	100.398	99.9825	94.8885	0.17389	6.71051	2.95226	0.0893077	0.37624
CG10418	6.08535	5.20334	7.94217	6.1001	6.46355	7.02931	7.3969	7.59771	6.97552	7.08401	-0.182645	2.52509	0.724341	0.397055	0.801208
CG10420	19.2703	20.6132	22.9905	17.4685	20.0062	16.1414	23.7136	19.537	19.6348	21.9977	-0.011749	4.08094	0.00722732	0.932445	1
CG10424	13.523	13.6087	18.8104	16.0821	14.466	14.5793	20.8854	17.3662	16.5346	14.9137	-0.141709	3.99328	1.09958	0.297257	0.6788
CG10425	13.0159	13.0083	13.3763	13.032	13.2349	14.5793	17.8396	13.0246	13.6927	15.1001	-0.18098	3.99182	2.08633	0.152208	0.507875
CG10426	33.6385	33.2213	28.4246	32.4414	35.0879	32.8035	32.1983	34.461	36.6861	38.9621	-0.107584	5.04272	1.42232	0.236258	0.613612
CG10428	26.877	25.6164	25.2895	26.8959	20.6218	19.5259	30.2403	25.5066	26.352	27.7768	-0.0456841	4.80932	0.216937	0.642546	1
CG10431	3.71883	2.40154	2.50805	4.43644	3.69346	2.3431	3.26334	5.42694	3.10023	2.79632	-0.0184343	1.99759	0.00647043	0.937369	1
CG10433	205.888	188.121	283.41	194.094	226.84	255.138	355.051	278.402	210.041	260.804	-0.307988	8.17585	6.66702	0.0114903	0.108648
CG10435	29.9197	26.2168	30.3057	28.005	34.1645	35.6672	33.5036	36.0891	30.4856	34.6744	-0.20026	4.95877	3.17294	0.0783507	0.352778
CG10440	37.1883	42.2271	35.9488	47.6917	40.0125	34.1052	38.5074	39.3453	33.0692	42.6905	0.10801	5.22692	1.29882	0.257551	0.626261
CG10444	86.3782	84.6543	78.7947	79.024	63.4044	56.7552	68.9652	67.0227	47.2786	53.1301	0.423319	6.05944	11.5159	0.00103994	0.0226051
CG10445	1.18326	1.60103	1.04502	1.94094	0.307788	1.04138	1.08778	0.81404	2.32517	0.745686	0.051375	0.7218	0.0115753	0.914569	1
CG10459	0.676151	0.400257	2.71706	0.554554	0.923365	0.781035	1.958	1.35673	1.29176	0	0.00720866	0.120563	0.000202319	0.988684	1
CG10462	40.9071	28.4182	36.5758	28.2823	32.6256	28.6379	37.6372	33.9184	31.519	28.1496	0.0669278	5.08498	0.35382	0.5535	0.959037
CG10463	3.88787	5.20334	4.38909	6.93193	5.84798	6.50862	5.00378	5.42694	5.68376	3.54201	-0.00345887	2.57287	0.00026459	0.987059	1
CG10465	74.2075	71.2457	60.6113	70.1511	49.8617	41.1345	62.4385	37.9886	47.5369	46.9782	0.466336	5.92573	15.7085	0.000150839	0.00615388
CG10466	3.88787	4.60295	3.13507	4.71371	6.15577	5.72759	6.96179	5.69828	6.45882	4.84696	-0.41888	2.41575	4.5596	0.0355398	0.221736
CG10467	8.62092	12.6081	13.5853	8.87287	9.54144	10.9345	13.2709	11.1252	11.8842	12.6767	-0.167827	3.4847	1.25868	0.264982	0.636102
CG10469	4.90209	4.80308	4.8071	3.05005	5.2324	3.90517	5.87401	4.0702	4.65035	3.16916	0.0810651	2.11166	0.124031	0.725553	1
CG10470	20.4536	18.0116	18.1834	17.4685	18.1595	22.1293	27.412	24.1499	18.6014	20.1335	-0.281425	4.40374	4.58757	0.0349939	0.219311
CG10472	2.87364	6.20398	3.34407	4.71371	5.2324	3.64483	3.26334	4.6129	3.87529	5.40622	0.0782084	2.56379	0.059351	0.808097	1
CG10474	0	0	0	0	0	0	0	0	0	0	0	-1.29821	0	1	1
CG10476	0	0	0	0	0	0	0	0	0	0	0	-1.30545	0	1	1
CG10477	0	0	0	0	0	0	0	0	0	0	0	-0.229619	0	1	1
CG10479	24.6795	26.0167	24.4535	25.5095	24.9308	32.0224	35.0265	31.7476	32.5524	29.0817	-0.352408	4.79414	7.37055	0.00799186	0.0858574
CG10481	0	0	0	0	0	0	0	0	0	0	0	-1.29879	0	1	1
CG10483	49.8661	46.2297	42.2189	54.0691	51.4006	51.5483	47.4272	50.7419	51.4122	55.74	-0.0782688	5.55017	0.975166	0.326128	0.717593
CG10486	0.169038	0.200128	0.418009	0	0	0	0	0.271347	0	0	1.44772	-1.05922	1.6093	0.208505	0.613612
CG10492	51.8946	56.8365	57.4762	56.2873	56.633	54.4121	36.5494	60.5103	66.3967	61.3326	0.000170983	5.85315	4.43741e-06	0.998324	1
CG10494	5.4092	8.40539	7.73317	6.1001	4.92461	11.4552	7.17934	9.76849	8.00894	5.59264	-0.339926	3.01404	2.95405	0.0892119	0.37624
CG10495	5.24017	5.40347	4.5981	3.32733	7.07913	7.02931	9.57246	5.69828	4.9087	5.77906	-0.371041	2.47323	2.43366	0.122379	0.445297
CG10505	1.52134	1.80116	2.29905	1.10911	1.53894	1.82241	1.74045	2.71347	1.55012	1.67779	-0.170085	1.53812	0.241263	0.640606	1
CG10508	104.634	117.876	111.19	110.911	112.958	126.267	123.572	128.076	112.383	134.037	-0.163837	6.89505	6.07222	0.0156953	0.133248
CG10510	0	0.200128	0	0	0	0	0.217556	0	0	0	-0.0513536	-1.23652	0.00189405	0.969295	1
CG10512	41.9213	40.8262	42.2189	32.1642	43.7059	35.1466	48.9501	31.4762	27.6437	34.8608	0.171269	5.52364	1.19383	0.277569	0.653929
CG10513	13.0159	22.4144	22.7815	18.3003	16.9284	25.2535	26.7594	26.8633	21.7016	30.2003	-0.488246	4.63784	9.29733	0.00303868	0.0454226
CG10514	4.90209	7.00449	6.06113	5.54554	6.46355	10.4138	10.0076	18.1802	5.16706	9.32107	-0.819344	2.9165	16.6087	0.000101057	0.00477507
CG10516	13.0159	14.4092	21.3185	13.3093	12.3115	13.7983	20.8854	15.4668	11.6259	11.1853	0.0337924	3.85536	0.0240345	0.877156	1
CG10527	243.583	250.961	227.815	227.645	245.307	276.747	292.83	232.816	246.727	236.196	-0.104672	7.74114	1.10421	0.296249	0.677609
CG10543	94.8301	95.2611	93.634	97.8789	84.9496	90.0793	48.2974	93.072	102.824	94.8885	0.122637	6.5047	1.43184	0.234708	0.613612
CG10550	181.715	168.508	176.4	172.189	184.981	179.378	203.197	160.095	152.945	159.95	0.0464457	7.29341	0.317304	0.574679	0.978486
CG10553	8.95899	7.40475	10.2412	8.31832	3.69346	5.98793	6.74423	8.6831	6.20047	3.91485	0.337726	4.06222	1.58333	0.211642	0.613612
CG10555	46.4853	47.2303	44.0999	45.4735	31.0866	41.6552	26.9769	41.5161	43.6616	44.7411	0.117004	5.34073	1.35718	0.247205	0.613612
CG10559	2.7046	2.40154	2.92606	2.21822	2.15452	2.08276	2.39311	2.17077	2.58353	1.86421	0.17643	1.32977	0.36836	0.545477	0.951748
CG10560	24.8485	28.018	25.9166	23.5686	23.3919	24.4724	24.8014	16.5522	13.951	17.71	0.368118	4.82432	4.1561	0.0445144	0.253762
CG10561	47.4996	51.6331	54.9682	56.8418	63.0966	61.4414	55.4767	59.6963	60.1962	67.4845	-0.155866	5.74887	3.10364	0.0816234	0.361577
CG10562	9.80418	11.6074	10.6592	8.04104	11.0804	8.07069	11.5305	9.22579	13.176	7.8297	0.0453037	3.6514	0.0814391	0.776033	1
CG10565	58.8251	59.6383	58.7303	70.7057	78.7938	82.5293	81.3659	85.7456	86.8065	83.8896	-0.368114	6.22722	6.34499	0.0135958	0.121743
CG10566	31.9481	34.6222	29.8876	35.2142	35.7034	41.9155	56.7821	41.2447	41.8531	52.198	-0.48944	5.18292	14.3016	0.000284763	0.00966173
CG10570	0	0	0	0	0	0	0	0	0	0	0	-1.30545	0	1	1
CG10576	66.4318	59.8384	76.0776	59.6146	70.4835	82.0086	77.6674	72.9923	75.439	70.8401	-0.188288	6.33279	1.6471	0.202756	0.606192
CG10581	4.73305	3.80244	3.13507	2.77277	5.2324	4.16552	9.3549	7.32636	6.20047	8.20254	-0.848135	2.43318	15.9152	0.000137531	0.00579468
CG10584	14.0301	14.009	10.6592	17.1912	13.5427	12.2362	16.9694	13.0246	12.9176	13.7952	0.00142672	3.79373	0.000115192	0.991461	1
CG10585	29.0745	32.0205	30.9327	29.9459	30.471	31.2414	37.6372	34.1897	33.5859	35.4201	-0.176137	4.94229	3.54931	0.0629035	0.307208
CG10587	0	0	0	0	0	0	0	0	0	0	0	-1.30545	0	1	1
CG10588	0.169038	0.200128	0	0	0	0	0	0	0	0	2.14391	-1.20137	3.43387	0.102566	0.399724
CG10589	0	0	0	0	0	0	0	0	0	0	0	-1.25546	0	1	1
CG10590	48.8519	38.0244	42.2189	39.6506	40.6281	34.3655	34.8089	32.833	31.2607	35.9793	0.307867	5.34357	12.5518	0.000638519	0.0162072
CG10591	0	0	0	0	0	0	0	0	0	0	0	-1.1336	0	1	1
CG10592	0	0	0	0	0	0	0	0.271347	0.258353	0	-2.25386	-0.567114	2.70296	0.107425	0.409596
CG10597	0	0	0	0	0	0	0	0	0	0	0	-1.22699	0	1	1
CG10598	0	0	0	0	0	0	0	0	0	0	0	-1.27041	0	1	1
CG10600	69.6435	74.6479	73.7786	72.6466	78.486	78.3638	51.3432	72.4496	88.615	82.5847	-0.0165039	6.31957	0.0342086	0.853694	1
CG10602	72.8552	70.8455	69.5985	64.8829	65.5589	58.5776	70.9232	56.9828	68.4635	65.6203	0.101094	5.93946	1.5639	0.214442	0.613612
CG10616	31.272	30.8198	29.4696	29.3914	29.2399	33.5845	39.8127	26.0493	29.9689	30.7595	-0.0934515	4.82261	0.924261	0.339018	0.730439
CG10621	15.3824	17.211	34.4857	13.8639	18.1595	16.6621	50.6905	23.8785	16.5346	5.77906	-0.187934	5.50022	0.181241	0.671358	1
CG10623	26.2008	29.619	27.1706	29.6687	33.8567	34.1052	29.8051	29.0341	30.2273	31.6916	-0.0854339	4.96352	0.699316	0.4053	0.810455
CG10625	4.0569	4.00257	3.97109	3.32733	2.15452	3.90517	1.958	3.79886	3.10023	3.35559	0.152051	1.99888	0.28371	0.595635	0.989382
CG10628	10.3113	9.20591	12.7493	13.032	13.8505	15.1	17.1869	12.7533	15.7595	16.4051	-0.400109	3.69959	5.9557	0.0166935	0.137961
CG10631	207.747	226.145	196.046	205.185	210.219	180.94	81.5834	196.726	213.658	206.741	0.249718	7.34753	6.25445	0.0142579	0.125522
CG10635	17.749	17.0109	18.8104	17.7457	21.2374	24.7328	27.1945	18.9943	22.2183	26.6583	-0.380911	4.40328	5.1717	0.0254132	0.178635
CG10638	64.4033	65.6421	79.2127	76.5285	58.4798	73.6776	78.3201	58.0682	67.1717	64.5018	0.010661	5.41327	0.00887511	0.92516	1
CG10639	34.8218	36.6235	40.3379	34.9369	33.5489	35.4069	47.6447	39.6166	37.9779	42.3177	-0.171525	5.31354	2.56994	0.112529	0.422035
CG10646	10.3113	12.2078	12.7493	13.3093	8.92586	11.4552	16.0991	13.5673	11.3675	11.7445	-0.158156	3.50013	1.11562	0.293782	0.674457
CG10650	2.87364	4.00257	5.01611	3.32733	3.38567	7.28966	4.56867	6.24098	9.55905	4.47411	-0.768096	2.11403	3.76278	0.0556385	0.28426
CG10651	0.169038	0	0	0.277277	0	0	0	0.271347	0	0	0.645296	-0.80652	0.309731	0.591775	0.986409
CG10654	22.9891	26.0167	26.3346	32.1642	30.7788	39.0517	38.5074	38.2599	36.9444	39.8942	-0.486541	4.77213	16.4803	0.000106966	0.00491545
CG10657	62.713	52.0334	40.9649	51.8508	48.9383	50.5069	47.6447	43.1441	39.2696	41.572	0.210144	5.56239	1.97529	0.163441	0.531058
CG10659	0	0	0	0	0	0	0	0	0	0	0	-1.049	0	1	1
CG10660	17.918	18.2117	19.0194	17.4685	19.6984	18.7448	23.0609	21.9791	18.8598	16.9643	-0.109105	4.17812	0.785488	0.377906	0.778382
CG10663	4.0569	4.00257	3.97109	4.43644	5.84798	3.90517	3.48089	3.25616	3.87529	4.47411	0.205891	2.47793	0.587521	0.44545	0.856442
CG10669	22.9891	22.6145	22.5725	20.7958	18.4673	24.7328	23.0609	26.0493	26.352	24.4212	-0.206635	4.45886	3.37823	0.0694689	0.32659
CG10671	29.9197	26.417	25.0805	27.4504	30.1632	33.5845	28.2823	27.406	30.744	33.183	-0.142142	4.96172	2.07864	0.152956	0.509864
CG10672	34.9908	36.2232	37.2028	34.6597	48.6305	45.0397	52.4309	40.4307	38.4946	41.7584	-0.192832	5.34835	2.86374	0.0941679	0.38749
CG10674	12.5088	13.6087	14.2123	11.9229	11.0804	9.63276	17.8396	14.11	10.8508	13.6088	-0.0603526	3.7177	0.185273	0.667943	1
CG10680	58.6561	40.4259	220.709	42.978	37.858	54.1517	153.377	72.1783	67.4301	26.6583	0.109365	6.96691	0.0829646	0.774003	1
CG10681	6.25439	8.60552	7.94217	7.76376	9.54144	11.4552	12.1831	7.05502	8.26729	10.8124	-0.329442	3.07187	2.79611	0.0980789	0.397906
CG10688	16.2276	12.6081	16.9294	14.1411	14.7738	12.4966	22.6258	11.6679	10.8508	13.9816	0.0537966	3.81924	0.128472	0.720889	1
CG10694	0.338075	0	0	0	0	0.260345	0.217556	0	0	0	-0.111173	-1.1271	0.00772773	0.956588	1
CG10700	0	0	0	0	0	0	0	0	0	0	0	-1.19658	0	1	1
CG10702	32.4552	39.6254	40.1289	37.7097	39.7047	37.4897	33.0685	43.1441	34.8776	43.4362	-0.0208737	5.29193	0.0425603	0.837036	1
CG10710	5.74728	6.80437	7.10615	6.93193	7.38692	6.24828	6.74423	7.05502	5.42541	5.59264	0.124024	2.62807	0.340726	0.560918	0.965175
CG10713	29.4125	33.4214	26.3346	30.2232	39.0891	25.7741	19.58	31.2049	30.4856	28.5225	0.222416	4.74892	4.15405	0.0445659	0.253888
CG10721	14.8753	16.6107	15.6753	18.5776	16.9284	15.1	21.3205	20.0797	14.2094	19.9471	-0.142843	4.28273	1.22371	0.271678	0.645431
CG10725	0.169038	0	0	0	0	0	0	0	0	0	1.43745	-1.13901	1.01285	0.319827	0.710647
CG10730	0.169038	0.200128	0.209004	0.554554	0	0.260345	0.652667	1.08539	0	0.559264	-1.11573	-0.481186	2.13771	0.147312	0.497987
CG10731	8.11381	7.20462	6.27013	7.48649	6.15577	9.37242	13.2709	5.69828	5.68376	8.94823	-0.291472	3.37365	3.2138	0.0764883	0.346958
CG10732	96.5205	96.8622	92.171	114.238	140.351	129.391	74.6216	106.097	102.308	119.683	0.0180729	6.58014	0.0286242	0.866042	1
CG10734	0.169038	0.200128	0	0	0	0.260345	0	0	0	0	0.621869	-1.01926	0.263068	0.609448	0.995152
CG10737	327.764	327.61	302.22	333.842	351.802	328.555	258.239	297.396	306.923	339.101	0.102448	8.2595	1.59696	0.209703	0.613612
CG10738	7.60669	10.6068	9.4052	9.98198	8.31028	10.4138	4.78623	11.3966	7.75058	9.50749	0.0717612	3.31074	0.159954	0.690177	1
CG1074	18.4251	20.8134	20.9004	19.4094	20.314	18.7448	21.3205	17.9089	15.2428	16.4051	0.154593	4.17683	1.59312	0.210248	0.613612
CG10747	29.0745	29.2188	22.9905	25.7868	26.7776	31.7621	38.7249	26.592	30.4856	31.6916	-0.251131	4.95873	6.06852	0.015726	0.133392
CG10748	0	0	0	0	0	0	0	0	0	0	0	-1.29811	0	1	1
CG10749	0	0	0	0	0	0	0	0	0	0	0	-1.29809	0	1	1
CG10750	0	0	0	0	0	0	0	0	0	0	0	-1.24678	0	1	1
CG10752	0	0	0	0	0	0	0	0	0	0	0	-0.90431	0	1	1
CG10754	12.3397	12.0077	13.7943	15.2502	14.466	17.7035	20.4502	16.5522	15.7595	18.2693	-0.397044	3.9491	10.6894	0.00154342	0.0288135
CG10761	0	0	0	0	0	0	0	0	0	0	0	-1.2705	0	1	1
CG10764	0.845188	0.800514	0.209004	0.277277	0	0	0	0.542694	0.775058	0.372843	0.459602	-0.560838	0.273697	0.60219	0.993076
CG1077	0.507113	0.600385	0.209004	0.831832	0.615577	0	0.870223	0	0.258353	0.745686	0.394439	-0.519662	0.235516	0.628681	1
CG10777	187.125	182.917	167.413	189.38	134.196	106.481	92.8963	135.673	147.261	134.969	0.481711	7.35355	19.6094	2.74334e-05	0.00203044
CG10778	25.1866	21.0135	23.4085	24.4004	18.7751	20.5672	21.1029	16.5522	19.8932	15.8458	0.269141	4.35681	5.58986	0.0202858	0.156225
CG10793	0.169038	0.200128	0	0.554554	0	0	0	0	0	0	3.01505	-0.814787	4.645	0.0343456	0.216874
CG10795	12.1707	15.61	11.2862	16.6366	11.696	14.8397	18.7098	16.5522	13.951	14.7273	-0.227886	3.86211	2.81685	0.096861	0.394693
CG10799	9.80418	10.4067	77.1227	16.6366	16.9284	22.9103	46.9921	26.592	20.4099	9.32107	0.0636303	5.33231	0.0218287	0.882885	1
CG10801	0.169038	0	0	0	0.615577	0.260345	0	0	0.775058	0	-0.426787	-1.17312	0.186651	0.667403	1
CG10802	26.7079	26.8172	26.7526	26.0641	28.6243	34.3655	36.9845	39.3453	30.2273	38.03	-0.40884	4.93304	18.6621	4.11976e-05	0.00258959
CG10803	39.8929	41.4266	35.7398	40.2052	33.2411	28.1172	29.37	35.5464	32.0357	37.6571	0.228034	5.38595	3.87601	0.0521576	0.27418
CG10804	109.367	109.67	99.4861	111.465	86.1807	83.3104	76.1445	97.6849	94.2988	92.6514	0.21886	6.64613	5.65058	0.0196374	0.153206
CG10809	16.2276	14.4092	17.7654	15.5275	17.5439	18.4845	17.8396	16.0095	19.8932	21.8113	-0.21223	4.15883	2.97161	0.0882825	0.37624
CG10814	0.338075	0	0.209004	0	0.307788	0	0	0	0.775058	0	0.260186	0.238209	0.0299408	0.863066	1
CG10822	0	0	0	0	0	0	0	0	0	0	0	-1.29814	0	1	1
CG10824	13.692	11.8076	11.2862	13.032	13.8505	9.63276	11.9656	9.76849	14.2094	11.7445	0.145869	3.95397	0.468906	0.495308	0.909457
CG10827	0	0.200128	0	0.554554	0	0.52069	0	0.271347	0	0	-0.0644909	-0.389113	0.00360064	0.952303	1
CG10830	290.407	304.195	256.449	290.309	242.845	179.898	224.953	221.148	194.281	210.097	0.42608	7.93137	20.9465	1.55681e-05	0.00137567
CG10834	0	0	0	0	0	0	0.435112	0	0	0	-2.2236	-1.25523	3.34745	0.089522	0.37624
CG10839	0	0	0	0	0	0	0	0	0	0	0	-1.29797	0	1	1
CG10841	0	0.200128	0	0	0.307788	0.260345	0	0	0	0	0.672088	-1.03977	0.304613	0.591775	0.986409
CG10845	0.169038	0	0	0	0	0	0	0	0	0	1.4369	-1.29087	1.74849	0.248344	0.613612
CG10853	0	0	0	0	0	0	0	0	0	0	0	-1.27038	0	1	1
CG10859	0.169038	0	0.209004	0.277277	0	0	0.217556	0	0	0.186421	0.43447	-1.16224	0.185277	0.697944	1
CG10862	0	0	0	0	0	0	0	0	0	0	0	-1.22587	0	1	1
CG10863	194.393	199.728	208.168	166.366	163.743	185.626	218.426	203.51	161.212	197.42	-0.0503945	7.43044	0.258819	0.612218	0.996261
CG10864	3.54979	3.20205	3.13507	2.4955	3.07788	2.86379	1.958	3.52751	3.87529	3.35559	0.00506965	1.66144	0.000418759	0.98372	1
CG10866	19.9464	21.4137	16.7204	19.6867	14.7738	16.9224	19.58	15.4668	15.7595	17.71	0.11804	4.27847	0.750753	0.388616	0.79043
CG10869	0.845188	1.4009	1.25403	0.831832	0.307788	2.86379	0.217556	0.542694	2.58353	1.30495	-0.61462	0.639035	1.68406	0.19781	0.597142
CG10874	25.8628	27.0173	22.3635	23.2913	23.3919	28.6379	33.9387	22.7931	26.352	27.4039	-0.189761	4.74364	3.5098	0.0643574	0.311399
CG10877	4.56402	5.40347	2.71706	4.15916	2.77009	2.08276	5.22134	5.15559	2.84188	4.66054	-0.0197259	1.88279	0.00578095	0.949547	1
CG10880	4.0569	7.60488	3.76208	4.15916	6.46355	5.72759	5.4389	7.32636	6.45882	7.45686	-0.323402	2.7144	2.23607	0.138435	0.479024
CG10881	0	0	0	0	0	0	0	0	0	0	0	-1.24817	0	1	1
CG10887	0	0	0	0	0	0	0	0	0	0	0	-1.22075	0	1	1
CG10889	4.56402	3.60231	5.43412	4.43644	3.38567	3.38448	3.04578	5.96963	4.392	5.59264	-0.0547313	2.30129	0.0549253	0.815254	1
CG10898	21.1297	18.4118	18.8104	22.7367	15.3894	17.7035	21.1029	13.8387	20.1515	19.2014	0.0678829	4.3067	0.379358	0.539552	0.948114
CG10899	0	0	0	0	0	0	0	0	0	0	0	-1.19973	0	1	1
CG1090	311.874	334.415	309.536	323.86	245.615	254.617	239.746	270.533	273.079	287.462	0.203159	8.09805	4.10082	0.045922	0.25511
CG10903	7.94477	7.60488	7.31516	8.59559	8.61807	8.33104	13.2709	11.9393	8.00894	6.33833	-0.256774	3.18555	2.35511	0.128495	0.45789
CG10904	9.97322	9.20591	10.6592	9.98198	8.00249	13.7983	13.0533	8.6831	11.3675	6.33833	-0.140357	3.38632	0.815867	0.418121	0.824445
CG10907	7.94477	8.00514	7.31516	10.5365	9.23365	10.1535	11.9656	11.1252	9.04235	12.6767	-0.370031	3.32963	3.9177	0.0509358	0.270448
CG10909	0	0.200128	0	0	0	0	0	0	0	0	1.45514	-1.27631	1.76956	0.248344	0.613612
CG1091	43.4427	41.2265	43.4729	39.0961	41.2436	46.6017	45.4692	48.2997	47.5369	42.8769	-0.14382	5.39716	3.0998	0.0818089	0.362207
CG10910	0	0	0	0	0.307788	0	0	3.52751	0	0	-3.25656	-0.303139	3.69507	0.0597426	0.29738
CG10911	0	0	0	0	0.307788	0.260345	0	10.0398	0	0.186421	-4.81738	1.63504	5.85519	0.0184204	0.146374
CG10912	0	0.200128	0	0	0	0	0	2.44212	0	0.372843	-3.00365	0.0356266	3.4626	0.0669021	0.318008
CG10914	5.74728	8.60552	8.98719	7.76376	7.69471	10.4138	7.3969	8.6831	8.00894	8.01612	-0.131922	3.03025	0.643291	0.424703	0.831169
CG10915	93.8159	89.2573	84.4378	80.965	96.3377	98.15	70.4881	89.0018	93.2653	105.887	-0.0385742	6.46061	0.238076	0.626824	1
CG10916	17.0728	23.2149	18.3924	15.8048	18.4673	19.7862	24.1487	16.8235	19.1181	17.71	-0.0684773	4.06629	0.311259	0.578339	0.982324
CG10918	0.507113	1.00064	1.04502	0.831832	0.615577	0.52069	0.435112	0.542694	0.775058	0.372843	0.597184	-0.246781	0.769943	0.382647	0.783419
CG10919	0.169038	0	0.209004	0	0.307788	0	0.217556	0	0	0.559264	-0.366329	-0.87661	0.133747	0.715506	1
CG1092	18.9322	17.6113	24.6625	19.964	9.54144	14.8397	27.6296	14.11	19.1181	15.1001	0.00759864	4.15709	0.00178841	0.966365	1
CG10920	0	0	0	0	0	0	0	0	0	0	0	-1.27055	0	1	1
CG10924	15.0443	10.4067	22.7815	11.3684	11.696	19.2655	18.0571	16.2808	15.2428	16.7779	-0.251779	4.60565	0.944297	0.333864	0.724136
CG10927	1.52134	4.00257	2.29905	1.38639	1.53894	1.30172	3.916	2.98482	2.32517	2.6099	-0.271275	1.4439	0.56915	0.45263	0.863535
CG10931	0	0	0	0	0	0	0	0	0	0	0	-1.22248	0	1	1
CG10932	21.4678	16.2104	23.6175	17.4685	18.7751	23.6914	28.4998	21.4364	21.7016	19.2014	-0.226614	4.52872	1.79603	0.183676	0.571493
CG10933	3.88787	4.60295	3.34407	4.15916	3.07788	3.12414	3.69845	2.44212	2.58353	2.98274	0.360242	1.86578	1.86864	0.175146	0.555505
CG10934	0.169038	0.200128	0.209004	0	0	0	0	0	0	0.186421	1.12733	-0.992387	0.983721	0.332129	0.72182
CG10936	9.29707	6.80437	10.6592	13.5866	5.84798	5.2069	7.17934	6.51232	7.23388	4.84696	0.580845	3.6398	5.09663	0.0264706	0.183197
CG10943	0	0	0	0	0	0	0	0.271347	0	0.186421	-2.22777	-0.918926	2.63911	0.108945	0.413767
CG10947	90.0971	75.4484	63.1194	65.4374	69.2524	67.95	66.137	51.2845	52.1873	73.8229	0.222733	5.89156	3.05398	0.0840609	0.368858
CG10948	78.2644	97.2624	90.0809	85.9559	102.801	93.7242	70.2705	106.368	88.0983	101.227	-0.0179822	6.39119	0.040454	0.841064	1
CG10949	9.12803	11.2072	10.2412	13.5866	13.8505	14.8397	16.9694	14.11	11.6259	15.473	-0.351436	3.62542	3.74464	0.0562193	0.285515
CG10950	0.169038	0	0	0	0	0	0	0	0	0	1.43767	-1.07618	1.42759	0.248344	0.613612
CG10953	0	0	0.209004	0.277277	0.307788	0	0	0	0.258353	0	1.16988	-1.12979	0.793785	0.37748	0.77795
CG10958	7.43766	9.80629	9.82321	10.8138	11.3882	9.37242	7.83201	15.1954	12.6593	12.6767	-0.238823	3.46654	2.04213	0.156569	0.517079
CG10959	4.73305	5.40347	3.55308	4.99099	4.00125	3.64483	3.69845	4.0702	3.35859	7.08401	0.0360725	2.2222	0.0192867	0.968548	1
CG10960	188.139	199.528	200.226	189.658	176.978	160.893	182.312	137.301	168.704	176.914	0.208045	7.48649	4.15563	0.0445264	0.253762
CG10962	0.507113	0.800514	4.38909	1.94094	0	3.38448	1.52289	1.89943	0.775058	2.6099	-0.394876	1.60197	0.604449	0.43899	0.848802
CG10969	0	0	0	0	0	0	0	0	0	0	0	-1.27012	0	1	1
CG10970	0.338075	0.800514	0.418009	0	0.615577	0.260345	0.435112	0.271347	0	0.559264	0.428981	-0.434121	0.335137	0.564143	0.968235
CG10973	14.7063	17.0109	18.3924	19.1321	16.6206	16.1414	21.538	12.482	9.8174	15.8458	0.167056	4.05957	1.53719	0.218364	0.613612
CG10979	59.1632	64.4414	51.2061	57.3964	53.8629	48.4241	40.2478	51.0132	55.0291	49.4017	0.231352	5.66595	8.8501	0.003791	0.0524673
CG10984	54.5992	55.6357	64.1644	61.2783	65.8667	68.4707	66.7896	76.7911	70.272	68.4167	-0.219678	5.93901	3.8919	0.0516884	0.272484
CG10993	0.169038	0	0.209004	0	0	0	0.217556	0.271347	0	0	-0.0943375	-1.14461	0.00722474	0.956588	1
CG10996	0	0	0	0	0	0	0	0	0	0	0	-1.18168	0	1	1
CG11000	247.64	263.769	232.413	234.577	205.603	173.91	118.35	204.867	182.397	201.149	0.428086	7.70337	21.4458	1.26268e-05	0.00121029
CG11007	17.918	16.0103	18.3924	20.2412	20.6218	13.5379	18.0571	12.482	15.7595	17.71	0.251371	4.07638	2.95428	0.0892001	0.37624
CG11018	0	0	0	0	0	0	0	0	0	0	0	-1.30545	0	1	1
CG11023	0	0.400257	0.209004	0	0.307788	1.04138	0.435112	0	0	0	-0.607014	-0.982514	0.422032	0.51828	0.933284
CG11029	0.676151	1.00064	1.67204	1.66366	0.615577	0.52069	0	0.271347	0.775058	0.372843	1.50556	0.193556	5.03487	0.0273754	0.187428
CG1103	11.3255	15.61	11.4952	14.6957	15.3894	12.4966	16.5342	11.3966	11.6259	10.9989	0.10958	3.66931	0.351928	0.55456	0.959665
CG11030	30.2577	31.22	28.0066	37.1551	35.0879	30.981	29.8051	33.9184	30.744	35.4201	0.00121051	5.29467	9.67994e-05	0.992172	1
CG11034	4.0569	3.60231	6.89715	4.15916	3.69346	4.94655	2.61067	3.25616	4.13364	2.6099	0.376443	2.48689	0.997449	0.320693	0.711908
CG11035	12.8469	13.2085	10.8682	16.3594	19.6984	15.1	21.7556	17.0948	14.9845	15.6594	-0.232442	3.93979	2.17247	0.144102	0.491016
CG11037	0	0	0	0	0	0	0	0	0	0	0	-1.29789	0	1	1
CG1104	44.1188	41.8268	49.7431	40.7598	60.3265	53.3707	46.9921	45.5863	59.6795	48.2831	-0.103817	5.56914	0.82862	0.365182	0.76088
CG11041	0.338075	0.600385	0	0.831832	0.615577	0	0.435112	0	0.516706	0.372843	0.653836	0.775977	0.788962	0.376859	0.777085
CG11043	0.676151	0.400257	1.04502	0.554554	0.615577	1.04138	0	1.08539	0.775058	0.186421	0.171084	-0.236393	0.0664079	0.797248	1
CG11044	15.8895	17.6113	18.1834	18.3003	30.1632	25.2535	19.58	14.6527	21.4433	18.4557	-0.00476632	4.44404	0.000753883	0.978158	1
CG1105	48.5138	57.8371	48.489	47.969	51.4006	44.7793	54.8241	53.7267	50.8955	51.0795	-0.00629432	5.52951	0.00427251	0.948033	1
CG11050	309.508	281.781	243.281	261.75	275.47	257.221	292.613	233.901	271.787	233.959	0.0896111	7.80562	0.994868	0.321316	0.712441
CG11052	27.7222	26.2168	22.3635	27.4504	25.5464	19.7862	34.5914	25.7779	17.0513	27.5904	0.0453052	3.9357	0.07605	0.783376	1
CG11060	0	0.200128	0.627013	0	0.307788	0	0.217556	0.271347	0.258353	0.186421	0.230821	-0.778603	0.0570869	0.811722	1
CG11068	0.169038	0.400257	0.418009	0.277277	0.307788	0.260345	0.217556	0	0	0.186421	1.0381	-0.660841	1.2568	0.265483	0.636665
CG11069	11.8326	10.2065	10.8682	9.98198	10.4648	7.81035	9.57246	6.78367	8.78399	7.45686	0.402345	3.21854	6.20646	0.0146225	0.127591
CG11070	56.4586	51.8333	52.2511	49.9099	47.7072	60.6604	51.3432	51.8272	56.5793	56.8585	-0.100362	5.78004	1.9867	0.162244	0.528091
CG11073	203.859	196.526	193.12	180.507	204.679	206.714	170.346	180.717	204.357	183.625	0.0498807	7.57056	0.267022	0.606645	0.995152
CG11076	61.5297	63.4407	62.0743	61.001	62.7888	58.8379	83.759	72.1783	55.5458	67.2981	-0.120561	6.03904	2.12825	0.148199	0.499382
CG11077	31.61	26.417	34.9038	34.1051	20.9296	23.1707	40.9005	29.0341	21.7016	28.7089	0.044389	5.00976	0.110732	0.740112	1
CG11085	4.0569	3.40218	3.34407	4.99099	4.61682	4.16552	6.52667	6.51232	2.58353	4.66054	-0.277152	2.20716	1.37165	0.244719	0.613612
CG11089	41.5833	38.4247	96.1421	33.8278	39.7047	34.6259	50.9081	41.2447	35.6527	26.8447	0.407925	6.63662	0.973982	0.32642	0.717859
CG1109	26.7079	32.2207	34.6947	28.8368	30.7788	34.6259	29.1525	31.4762	34.6193	33.9287	-0.0961284	4.91145	0.780614	0.379384	0.779822
CG11095	12.1707	10.8069	11.4952	17.4685	13.5427	13.0172	16.7518	14.3814	13.4343	12.4902	-0.109141	3.71223	0.513062	0.475731	0.888715
CG11099	178.842	183.118	169.503	170.248	182.826	178.857	188.621	181.531	174.388	184.93	-0.0384662	7.37259	0.278569	0.598982	0.990524
CG11103	8.95899	13.6087	10.0322	9.42743	14.466	10.4138	15.4465	13.0246	11.6259	13.2359	-0.187292	3.49898	1.58787	0.210993	0.613612
CG11106	0	0	0	0	0	0	0	0	0	0	0	-1.30545	0	1	1
CG11107	61.0226	59.0379	56.8492	56.2873	64.9433	60.1397	55.9118	58.3396	60.4545	60.2141	0.0144225	5.84323	0.039879	0.842182	1
CG11109	11.3255	11.0071	12.5403	12.2002	12.3115	12.7569	18.7098	11.3966	9.3007	14.5409	-0.179969	3.68931	1.68208	0.19807	0.597474
CG11110	9.63515	10.2065	8.98719	10.8138	7.69471	7.28966	11.9656	10.0398	9.04235	11.1853	-0.0686705	3.31522	0.19929	0.656402	1
CG11112	0	0	0	0	0	0	0	0	0	0	0	-1.27047	0	1	1
CG11113	0	0	0	0	0	0	0	0	0	0	0	-1.29816	0	1	1
CG11122	113.762	129.683	114.952	125.607	123.731	138.764	38.2898	122.92	139.51	154.543	0.0329669	6.83584	0.0544598	0.816024	1
CG11123	12.3397	12.408	15.4663	12.7548	21.853	20.8276	16.9694	18.7229	15.2428	16.4051	-0.249672	3.96146	3.32283	0.0717522	0.334038
CG11125	4.90209	6.20398	3.34407	5.54554	5.54019	6.50862	8.91979	5.42694	5.94211	4.10127	-0.277999	2.80898	1.31628	0.2544	0.6214
CG11127	18.7632	16.0103	18.6014	16.0821	16.9284	16.6621	27.412	20.0797	16.5346	19.3878	-0.212658	4.27053	3.02131	0.0857079	0.37422
CG1113	4.56402	3.80244	6.27013	5.82282	5.84798	5.46724	3.916	5.15559	4.65035	4.47411	0.145803	2.36141	0.375264	0.541744	0.948847
CG11131	0	0	0	0.277277	0	0.52069	0	0	0.258353	0	-1.25745	-1.05894	1.03652	0.311899	0.698691
CG11134	4.73305	5.00321	9.61421	5.26827	7.38692	9.89311	11.3129	7.32636	5.42541	4.84696	-0.281367	3.26588	1.30638	0.256181	0.624018
CG11137	67.7841	64.2412	68.9715	64.051	68.0212	66.9086	105.079	59.6963	52.1873	72.7043	-0.101512	5.98195	0.801173	0.373208	0.771552
CG11138	87.2234	104.067	107.428	109.525	92.3365	96.588	61.5683	95.7854	86.5482	91.1601	0.214423	6.67524	5.45089	0.0218564	0.162885
CG11141	28.0602	28.2181	22.1545	23.2913	25.5464	31.7621	29.1525	30.9335	34.3609	28.7089	-0.278328	4.77348	6.64066	0.0116491	0.109623
CG11145	0	0	0	0	0	0	0	0	0	0	0	-1.27208	0	1	1
CG11147	116.129	104.667	99.9041	88.7287	92.6443	71.8552	78.9728	77.8765	71.8221	57.7906	0.490593	6.67314	19.4323	2.95899e-05	0.00214264
CG11148	395.041	397.655	381.015	390.406	394.585	313.455	283.91	344.882	353.943	334.999	0.264097	8.44178	21.9757	1.01235e-05	0.00106316
CG11149	0	0	0	0	0	0	0	0.542694	0	0	-2.26093	-1.0655	2.26235	0.14148	0.485529
CG11151	58.318	55.0353	49.5341	61.5555	60.0187	57.5362	87.0223	73.8063	53.7374	54.8079	-0.202412	6.06074	4.21675	0.0430234	0.248242
CG11155	750.696	729.468	622.206	670.456	575.564	359.016	500.813	457.219	404.58	418.516	0.645933	9.20832	16.1647	0.00012306	0.00546
CG11158	11.4946	11.4073	13.1673	8.31832	14.466	10.9345	18.0571	10.8539	11.8842	10.626	-0.0876558	3.34803	0.247536	0.620068	1
CG11159	0.507113	0.200128	0.627013	0	0.923365	0	0.217556	1.08539	0.516706	0.559264	-0.0754557	-0.525429	0.00919046	0.923846	1
CG1116	30.5958	31.6203	28.0066	24.955	36.0112	32.5431	35.4616	32.0189	29.9689	29.0817	-0.0742414	4.94012	0.526975	0.469826	0.883307
CG11160	6.42343	6.80437	9.1962	6.37738	8.92586	9.63276	9.3549	10.8539	6.20047	10.0668	-0.297965	3.23964	1.42164	0.236369	0.613612
CG11162	0	0	0	0	0	0	0	0	0.258353	0	-1.52246	-1.23464	1.22791	0.277526	0.653921
CG11164	1.01423	0.400257	0.627013	2.21822	1.23115	1.04138	0.217556	0	0.775058	1.49137	0.51173	0.679388	0.517341	0.473902	0.887271
CG11165	0	0	0	0	0	0	0	0	0	0	0	-1.29804	0	1	1
CG11168	26.877	30.6196	26.1256	26.0641	30.471	31.2414	22.4082	28.2201	27.9021	27.0311	0.036162	4.80266	0.151158	0.698379	1
CG11170	4.73305	5.20334	5.01611	5.82282	4.92461	3.38448	4.78623	2.44212	3.35859	4.28769	0.469139	2.29598	4.22782	0.042757	0.247473
CG11178	21.9749	23.6152	19.4374	18.3003	24.9308	25.5138	14.1411	27.1347	27.9021	23.8619	-0.126557	4.46084	1.0743	0.302844	0.686334
CG11180	6.25439	7.00449	6.27013	6.93193	6.46355	7.55	5.4389	11.1252	7.75058	7.64328	-0.254318	3.25645	1.36301	0.2462	0.613612
CG11190	34.1456	32.8211	37.6208	37.1551	36.6268	31.7621	33.9387	41.7874	33.5859	39.1485	-0.0172743	5.15463	0.0457388	0.831151	1
CG11191	26.877	27.4176	28.8426	29.9459	48.6305	46.8621	36.3318	47.2143	42.3699	48.4696	-0.464688	5.03348	10.0994	0.00205272	0.0348942
CG11192	0	0	0	0	0	0	0	0	0	0	0	-1.26967	0	1	1
CG11200	27.5531	31.22	23.6175	21.9049	33.2411	22.9103	31.5456	26.8633	19.1181	19.3878	0.198235	4.73509	2.52381	0.11576	0.429931
CG11208	31.7791	30.6196	28.4246	25.2322	32.3178	28.6379	35.4616	28.4914	29.7106	30.5731	-0.0436851	4.95774	0.140026	0.709164	1
CG11210	74.5456	75.4484	70.6435	67.3784	59.7109	57.5362	59.8278	62.6811	62.263	59.6549	0.206701	6.08668	4.26642	0.0418422	0.244859
CG11211	263.361	205.132	73.5696	307.778	62.7888	129.652	130.316	189.943	120.134	151.188	0.342163	7.53658	1.84634	0.177715	0.560504
CG11221	32.6243	29.619	26.5436	24.6777	22.7763	21.6086	23.496	19.8083	25.5769	20.5064	0.304183	4.6826	6.61889	0.011782	0.110345
CG11226	0.338075	0.200128	0	0	0.615577	0.260345	0.217556	0	0.516706	0	0.202693	-0.652961	0.0434064	0.835448	1
CG11227	0	0	0	0	0	0	0	0	0	0	0	-1.25466	0	1	1
CG11231	0	0	0	0	0	0	0	0	0	0	0	-1.18828	0	1	1
CG11236	4.56402	4.00257	17.9744	2.77277	3.07788	6.76897	14.7938	6.51232	3.35859	2.05064	-0.00851196	3.56198	0.000375376	0.984587	1
CG1124	195.238	142.291	118.715	153.889	147.431	137.202	158.598	118.579	135.635	166.847	0.0791577	7.18308	0.256452	0.613847	0.997747
CG11241	24.3414	24.6158	32.8137	27.7277	28.0087	24.2121	25.8891	25.7779	24.8019	27.4039	0.098496	4.75234	0.673029	0.414235	0.819679
CG11247	78.6025	69.2444	81.9298	82.6286	96.3377	90.8604	79.843	81.1327	73.6305	92.8379	-0.0369133	6.35644	0.286614	0.593762	0.988736
CG11248	34.8218	42.027	39.2928	42.7007	48.6305	38.531	45.4692	43.1441	37.7195	40.6399	0.00776616	5.34136	0.00482767	0.944766	1
CG11249	0.169038	0	0	0	0	0	0	0	0	0.186421	-0.0531916	-0.852113	0.00177045	0.969295	1
CG11251	0	0	0	0	0	0	0	0	0	0	0	-1.27043	0	1	1
CG11257	5.57824	5.80372	5.01611	8.04104	10.157	9.11207	6.52667	6.51232	9.8174	6.89759	-0.192777	2.90357	0.861222	0.355959	0.749702
CG1126	1.69038	0.200128	0.836018	1.10911	0.923365	0.781035	1.30533	1.08539	1.55012	1.67779	-0.418626	0.674592	0.990979	0.322258	0.713136
CG11261	5.57824	4.2027	4.8071	3.32733	4.00125	2.86379	5.22134	3.25616	3.10023	2.6099	0.375749	2.27929	1.86001	0.176135	0.557676
CG11262	0	0.200128	0	0	0	0	0	0	0	0	1.45515	-1.26261	1.65538	0.248344	0.613612
CG11263	1.52134	0.600385	0.418009	0.554554	0.307788	0.781035	1.08778	1.08539	0.516706	0.932107	-0.285409	0.312357	0.221526	0.639055	1
CG11266	309.001	282.381	310.999	300.291	321.639	321.526	271.945	329.415	286.255	327.542	-0.0117973	8.19618	0.0447595	0.832941	1
CG11267	64.2343	53.6344	63.5374	54.6236	52.9396	65.0862	86.8048	60.239	54.7708	67.2981	-0.209117	5.7783	3.40695	0.0683166	0.322714
CG11269	0	0	0.209004	0	0	0	0	0	0	0	1.4595	-1.20639	1.43105	0.248344	0.613612
CG11275	42.0904	41.2265	37.6208	42.4234	42.7826	37.4897	41.9883	39.0739	37.9779	37.2843	0.0877977	5.42651	0.871961	0.352992	0.746555
CG11279	9.46611	13.2085	12.7493	11.3684	10.4648	8.33104	14.5762	9.49714	11.1092	10.0668	0.0911062	3.80888	0.331787	0.566093	0.970435
CG11284	42.9356	41.6267	49.5341	42.978	33.2411	33.5845	45.6867	38.2599	39.7863	31.5052	0.16034	5.44402	2.54134	0.11452	0.427297
CG11286	0	0	0	0	0	0	0	0	0	0	0	-1.27728	0	1	1
CG11289	0.169038	0	0.209004	0	0	0.260345	0	0.271347	0	0	-0.109534	-1.1019	0.00727141	0.956588	1
CG1129	25.1866	27.6177	27.3796	31.055	24.3153	22.9103	29.5876	31.4762	26.0936	23.6755	0.0202385	4.62812	0.0436535	0.834987	1
CG11291	0	0.200128	0	0	0	0	0.217556	0	0	0	-0.051326	-1.06033	0.00161208	0.969295	1
CG11294	6.76151	7.80501	5.43412	5.54554	6.46355	4.68621	6.52667	5.15559	6.97552	8.76181	-0.0131633	2.80185	0.00421822	0.948364	1
CG11298	0	0	0	0	0	0	0	0	0	0	0	-1.30545	0	1	1
CG11300	0	0	0	0	0	0	0	0	0	0	0	-1.19243	0	1	1
CG11306	90.6042	90.0578	89.4539	82.6286	85.5651	77.5828	112.476	80.59	90.1651	90.4144	-0.0423465	6.46993	0.308443	0.58006	0.983573
CG11307	13.1849	11.8076	14.6303	9.98198	15.0816	13.7983	17.622	13.296	12.9176	14.3544	-0.157635	3.74506	1.30147	0.257069	0.625363
CG11309	41.0761	44.0283	58.5213	38.2643	36.0112	43.2173	54.389	42.6015	43.92	34.488	0.00107091	5.61505	5.44487e-05	0.994129	1
CG11313	0	0	0.418009	0	0	0.260345	0.217556	0	0	0	-0.0635208	2.22878	0.00203285	0.96418	1
CG11317	49.8661	58.4375	63.7464	62.6647	76.6393	70.0328	69.6179	82.2181	67.9468	74.0093	-0.229536	6.09997	5.73675	0.0187543	0.148393
CG11318	1.01423	0.400257	1.25403	0.277277	3.07788	0.52069	0.217556	1.35673	0.516706	0.932107	0.695059	0.124643	1.55582	0.215619	0.613612
CG11319	310.86	323.808	278.603	329.405	256.695	214.264	142.717	226.032	235.101	234.145	0.511522	8.07234	23.0843	6.40208e-06	0.000799434
CG11320	0.845188	0.600385	0	0.277277	0	0	0	0	0.775058	0.745686	0.232398	-0.358179	0.0726575	0.788143	1
CG11321	235.977	209.134	176.191	201.026	242.229	199.164	111.389	148.698	215.725	192.387	0.295554	7.46038	6.52571	0.0123687	0.114116
CG11322	0.676151	0.400257	0.418009	0.831832	0	0.781035	0.217556	0.81404	0	0	0.47101	-0.463695	0.34574	0.558055	0.962626
CG11327	0.338075	0.200128	0.209004	0	0	0	0.217556	0	0	0	1.45023	-0.96472	1.71611	0.193801	0.589639
CG11329	0.169038	0.400257	0.418009	0.277277	0	0	0.435112	1.35673	0.516706	0.559264	-1.03094	0.0700426	1.64467	0.203085	0.606679
CG11333	0	0	0	0	0	0	0	0	0.258353	0	-1.52253	-1.27627	1.90444	0.229901	0.613612
CG11334	24.1724	23.8153	24.6625	22.4595	31.0866	30.981	31.1105	22.2504	27.127	24.0484	-0.107226	4.52922	0.563409	0.454911	0.866663
CG11337	12.1707	10.8069	13.3763	11.0911	12.0037	16.4017	11.748	13.0246	15.2428	12.1174	-0.197945	3.69004	2.57412	0.136306	0.474901
CG11340	0	0	0	0	0	0.260345	0	1.08539	0.258353	0	-3.65734	-0.902667	6.8316	0.0107159	0.10355
CG11342	2.53556	2.00128	2.50805	2.21822	4.30904	1.04138	2.39311	2.98482	2.58353	3.35559	0.09489	1.46224	0.0828942	0.856225	1
CG11345	0	0	0	0	0	0.260345	0	0	0	0	-1.52265	-0.937302	1.57547	0.229901	0.613612
CG11349	3.04268	3.20205	4.38909	2.4955	2.46231	4.68621	5.4389	4.34155	1.55012	1.49137	-0.146708	0.689378	0.113148	0.737478	1
CG11350	0	0	0	0	0	0	0	0	0	0	0	-1.17011	0	1	1
CG11353	22.651	17.4112	11.4952	6.37738	10.157	8.33104	8.48468	5.15559	10.0758	8.20254	0.780068	2.87002	6.03864	0.0159764	0.135105
CG11356	0.338075	0	0	0	0	0.260345	0.435112	0.542694	0	0	-1.25211	-0.869465	1.33111	0.251762	0.617844
CG11357	57.6418	60.6389	59.1483	59.3373	48.3228	44.7793	55.0416	46.943	48.0536	53.8758	0.196985	5.7618	6.10667	0.0154123	0.131794
CG1136	48.6828	39.2252	33.4407	37.4324	31.0866	25.2535	33.9387	32.5616	32.0357	26.8447	0.34144	5.15406	5.39172	0.0225637	0.166119
CG11360	180.701	161.904	157.589	154.721	134.196	86.6948	111.389	105.283	88.8733	104.582	0.668049	7.40139	10.4309	0.00174825	0.0312759
CG11362	0	0.200128	0	0.277277	0	0	0.217556	0	0.258353	0.186421	-0.511336	-1.01626	0.239666	0.625873	1
CG11367	16.0586	12.0077	13.3763	15.5275	13.2349	14.319	15.0114	10.8539	11.3675	10.2532	0.185946	3.82248	1.6877	0.197329	0.596015
CG11368	416.002	324.008	255.403	338.833	318.561	329.336	502.989	363.605	235.101	384.028	-0.135308	8.26512	0.693907	0.407115	0.811807
CG11369	0	0	0	0	0	0	0	0	0	0	0	-1.27014	0	1	1
CG1137	0	0.200128	0.209004	0.277277	0.307788	0.260345	0	0.271347	0.775058	0.186421	-0.586243	-0.632264	0.412026	0.522627	0.938624
CG11370	0	0	0	2.4955	0.307788	0.260345	0.217556	3.52751	0	0	-0.601928	0.294008	0.238359	0.62662	1
CG11373	0	0.200128	0	0	0	0	0	0	0	0	1.45514	-1.29816	1.75007	0.248344	0.613612
CG11374	7.94477	7.60488	7.52416	5.54554	6.15577	2.60345	2.39311	2.71347	4.9087	2.98274	1.16971	2.38155	19.4035	2.99568e-05	0.00215986
CG11377	25.8628	23.2149	33.0227	23.014	28.0087	25.7741	33.9387	20.0797	20.4099	23.6755	0.100267	4.61025	0.754656	0.387392	0.789065
CG11378	27.8912	24.2155	26.5436	26.0641	20.0062	27.5966	27.8471	29.8482	31.0023	25.9126	-0.181127	4.74913	2.51599	0.116318	0.431311
CG11379	0	0	0	0	0	0	0	0	0	0	0	-1.24184	0	1	1
CG1138	0	0	0	0	0	0	0	0	0	0	0	-1.291	0	1	1
CG11380	1.69038	1.4009	0.627013	2.21822	0.615577	0.52069	0.652667	2.44212	1.55012	0.372843	0.308381	1.05799	0.532039	0.467706	0.881273
CG11381	0	0.200128	0	0	0	0	0.217556	0	0	0.186421	-0.756229	-0.596603	0.385433	0.536811	0.945852
CG11382	0	0	0	0	0	0	0	0	0	0.559264	-2.65957	-0.811252	3.20236	0.0780396	0.351851
CG11384	0	0	0	0	0	0	0	0.271347	0	0	-1.52646	-1.16638	1.45948	0.232566	0.613612
CG11388	118.495	133.486	119.342	125.052	116.96	113.51	131.404	115.322	127.11	122.106	0.00901651	6.85171	0.0144818	0.90449	1
CG1139	0.169038	0.200128	0.418009	0.554554	0.307788	0	0.217556	1.08539	0	0.372843	-0.0541068	-0.400082	0.00405809	0.949352	1
CG11391	0	0.600385	0.209004	1.10911	0.307788	0.52069	0.217556	0	0.258353	0.372843	0.488636	2.83244	0.0266921	0.8706	1
CG11395	27.3841	18.4118	141.078	26.6186	24.6231	33.8448	82.6712	46.4003	48.5703	14.168	0.0918448	6.37588	0.0546156	0.815766	1
CG11396	24.0033	22.2143	28.8426	24.955	23.6997	27.8569	33.5036	26.0493	25.5769	29.2682	-0.20364	4.71742	3.74694	0.0561453	0.28528
CG11398	6.42343	5.40347	4.5981	5.26827	6.15577	6.50862	9.3549	7.05502	8.00894	8.20254	-0.49387	2.80146	7.61602	0.00705051	0.0788856
CG11399	72.3481	77.85	73.7786	76.2512	67.4056	71.0742	58.305	74.0777	67.6884	72.5179	0.0984968	6.20105	1.24082	0.268375	0.641577
CG11400	20.7916	14.4092	48.28	13.8639	19.0829	15.3603	28.2823	23.3358	16.7929	9.50749	0.338198	5.27972	1.39023	0.241574	0.613612
CG11403	2.87364	2.20141	2.71706	2.4955	5.54019	3.64483	2.61067	4.6129	3.87529	6.52475	-0.469268	1.95935	2.89832	0.0922353	0.382834
CG11404	0.169038	0	0.209004	0	0	0	0	0.271347	0.516706	0.372843	-1.205	-0.826314	1.24394	0.267779	0.640559
CG11406	2.7046	2.60167	2.71706	2.4955	3.07788	3.64483	1.08778	1.35673	2.32517	3.35559	0.194662	1.26252	0.38991	0.533978	0.94387
CG11407	30.9339	35.823	29.8876	41.037	32.9333	33.8448	32.8509	31.2049	22.9934	31.8781	0.154021	5.66476	1.13224	0.290237	0.670672
CG11409	1.01423	1.20077	1.25403	1.66366	1.23115	1.04138	2.17556	2.44212	0.775058	2.79632	-0.575712	1.38374	2.16806	0.144505	0.491667
CG11412	37.6954	39.8256	42.6369	47.969	45.5527	47.6431	47.6447	47.4857	47.7953	46.7918	-0.155619	5.46305	1.61513	0.207153	0.613435
CG11413	5.4092	5.6036	3.76208	4.71371	4.61682	4.94655	6.30912	3.52751	3.87529	4.66054	0.0450825	2.63717	0.0228781	0.880124	1
CG11414	46.8234	51.0327	49.9521	45.7507	49.5539	59.0983	43.7287	45.5863	51.1538	50.1474	-0.0376645	5.71926	0.157566	0.692378	1
CG11417	4.0569	4.2027	5.01611	5.26827	7.07913	7.55	6.74423	9.22579	7.49223	8.01612	-0.63057	3.03368	3.23188	0.0756798	0.344931
CG11418	11.8326	10.2065	12.3313	10.2593	11.696	17.9638	15.0114	13.296	13.176	13.0495	-0.359891	3.63914	7.14617	0.00896728	0.0921916
CG1142	9.46611	10.6068	10.8682	9.7047	12.3115	13.2776	16.9694	18.9943	10.8508	17.8965	-0.567704	3.68731	8.60858	0.00427533	0.0571193
CG11423	0.338075	0.800514	0.209004	0	0.615577	0.260345	0.217556	0.271347	1.80847	0	-0.276943	-0.497649	0.113827	0.736679	1
CG11425	28.0602	33.2213	29.6786	29.3914	28.0087	33.0638	31.328	33.647	35.6527	29.641	-0.135187	4.94032	0.29165	0.590542	0.986409
CG11426	1818.84	2231.63	2101.75	2496.33	1105.27	2652.13	2681.81	2341.18	2453.58	2601.14	-0.384068	11.0573	10.6237	0.00159303	0.0295418
CG1143	6.76151	5.80372	5.85213	4.15916	8.00249	8.59138	9.3549	8.41175	6.71717	6.89759	-0.38429	3.29229	3.43052	0.0673864	0.319675
CG11436	7.94477	8.00514	9.4052	7.76376	9.84922	10.6741	13.706	8.41175	9.04235	13.0495	-0.368288	3.39024	7.17892	0.00881752	0.09137
CG11437	1.3523	2.20141	2.09004	1.94094	1.53894	2.86379	1.74045	1.35673	5.16706	2.79632	-0.599016	1.44443	2.899	0.0921976	0.382834
CG11438	10.8184	9.80629	9.1962	9.98198	5.84798	9.63276	6.09156	8.6831	16.0179	8.57538	-0.0735394	3.76074	0.162065	0.831346	1
CG11444	28.2293	31.8204	37.4118	30.7778	31.3944	42.4362	52.4309	40.702	36.6861	35.7929	-0.382277	5.25013	8.18075	0.00529756	0.0654932
CG11447	7.60669	9.80629	8.77819	11.3684	11.0804	9.11207	16.9694	14.3814	13.4343	10.0668	-0.407969	3.43547	6.32371	0.0137484	0.122493
CG11448	253.049	268.572	251.432	249.272	291.475	278.048	205.155	296.039	277.213	306.104	-0.0528455	8.02675	0.552236	0.459403	0.871548
CG11449	1.3523	0.400257	1.88104	1.66366	1.84673	2.86379	2.82823	2.17077	7.75058	3.16916	-1.40599	1.57752	14.7879	0.000228304	0.0081599
CG11453	0.338075	0.400257	0.418009	0.554554	0.923365	0.52069	0	1.08539	0.516706	0.745686	-0.173895	0.899586	0.132855	0.734555	1
CG11454	16.3967	16.4105	15.4663	16.0821	15.3894	14.8397	22.1907	15.7381	16.2762	19.015	-0.147286	3.96558	1.26934	0.262982	0.633574
CG11455	140.977	142.692	129.374	137.252	116.036	115.333	174.48	137.301	119.617	142.612	-0.0489495	6.98771	0.253481	0.615904	0.999344
CG11456	22.313	21.2136	18.8104	19.4094	24.3153	17.9638	21.1029	11.3966	16.7929	16.2187	0.33889	4.31193	7.5712	0.00721334	0.0800116
CG11458	126.609	129.483	96.3511	100.097	63.4044	42.4362	66.3545	67.0227	49.087	41.572	0.960127	7.21074	9.15483	0.00325993	0.0473752
CG11459	1.01423	0.400257	24.2445	1.38639	1.53894	2.86379	4.56867	4.34155	0.775058	0.186421	1.22826	2.61929	1.55754	0.215368	0.613612
CG1146	62.882	62.6402	60.6113	59.06	70.1757	63.0035	70.9232	64.0378	58.9044	63.9425	-0.0263853	5.86716	0.0565709	0.812558	1
CG11470	0	0	0	0.277277	0.307788	0	0	0	0.258353	0.186421	-0.00125875	-1.10541	0.000137784	0.990672	1
CG11474	38.0335	38.6248	38.6658	37.7097	45.8605	39.0517	60.263	46.129	36.4277	45.114	-0.195924	5.33623	4.49461	0.0368438	0.227456
CG11475	0.845188	1.00064	1.46303	1.66366	2.46231	2.08276	1.30533	1.89943	1.03341	0.745686	0.0408067	1.17676	0.00978996	0.962172	1
CG11486	258.29	261.168	244.326	254.54	247.462	228.322	168.606	254.523	226.575	217.927	0.208595	7.95774	7.52647	0.00737976	0.0811705
CG11498	5.91632	7.60488	4.5981	6.1001	7.38692	7.28966	3.69845	6.78367	3.61694	4.10127	0.318011	2.35922	2.18979	0.142533	0.487854
CG11504	17.749	18.4118	22.1545	18.023	27.0854	23.1707	24.3663	29.3055	26.6103	28.1496	-0.356204	4.45027	4.43851	0.0380104	0.23087
CG11505	224.82	229.347	201.271	205.74	169.284	151.26	109.866	175.561	182.397	186.421	0.356716	7.5563	12.9728	0.000524798	0.0145643
CG11509	10.4803	12.408	7.52416	11.6456	12.6193	12.4966	4.78623	12.482	9.55905	10.2532	0.142712	3.3523	0.523959	0.471096	0.884501
CG11523	11.3255	12.2078	12.7493	9.42743	17.2361	14.319	16.0991	14.9241	16.0179	16.9643	-0.326629	3.8403	4.63669	0.0340566	0.215537
CG11526	65.2485	72.0462	72.7336	70.983	63.7122	76.5414	60.6981	75.4344	79.3143	79.7884	-0.108093	6.18239	2.22883	0.139067	0.480416
CG11529	1.52134	1.20077	2.29905	2.21822	2.15452	1.04138	2.17556	0.81404	0.775058	1.11853	0.605027	1.39749	1.84989	0.177303	0.560048
CG11534	14.7063	19.2123	17.5564	14.4184	12.9271	19.0052	16.3167	18.4516	22.9934	19.015	-0.271095	4.11005	4.73109	0.0323295	0.207831
CG11537	481.757	472.303	421.98	444.475	383.196	306.686	248.884	323.988	316.482	324.373	0.53601	8.3748	56.7064	4.36813e-11	1.82664e-07
CG11539	2.7046	2.8018	3.13507	3.88188	2.77009	4.94655	7.17934	4.0702	4.65035	4.47411	-0.737257	2.20742	10.617	0.0015982	0.029572
CG11550	92.8017	72.2464	58.9393	72.3694	72.0225	61.7017	71.5759	46.943	51.4122	77.9241	0.248209	6.09425	2.32277	0.131112	0.463366
CG11555	7.94477	8.80565	11.7043	9.42743	8.00249	7.28966	13.4885	9.76849	9.8174	9.50749	-0.123281	3.35254	0.402719	0.52735	0.939303
CG11560	11.6636	13.2085	13.3763	11.0911	14.466	14.5793	18.0571	14.9241	10.8508	12.4902	-0.155201	3.66985	1.214	0.273575	0.647987
CG11562	9.80418	10.4067	8.98719	7.20921	10.157	9.89311	13.4885	11.1252	10.8508	11.931	-0.297989	3.45799	2.97922	0.0878826	0.37624
CG11563	7.94477	7.40475	8.56918	10.8138	12.0037	11.7155	14.7938	8.41175	6.20047	8.57538	-0.113633	3.37861	0.302659	0.583627	0.986409
CG11566	0	0	0	0	0	0	0	0	0	0	0	-1.30545	0	1	1
CG11570	0	0	0	0	0	0	0	0	0	0	0	-1.23573	0	1	1
CG11576	46.1473	57.2367	47.862	44.0871	44.0137	46.8621	48.9501	46.129	41.0781	49.0288	0.0459434	5.55636	0.312688	0.577469	0.98124
CG11577	34.1456	30.8198	36.1578	30.7778	36.0112	29.6793	40.9005	27.1347	23.2517	28.5225	0.1639	4.94699	2.43661	0.122155	0.444967
CG11581	0	0	0	0	0	0	0	0	0	0	0	-1.30545	0	1	1
CG11583	8.28284	7.80501	8.56918	6.1001	9.84922	13.0172	13.4885	11.6679	8.00894	9.88033	-0.464702	3.45951	5.95801	0.0166732	0.137929
CG11584	0	0	0	0	0.307788	0.52069	0	0	0	0	-0.762587	-1.24103	0.265328	0.611362	0.995934
CG11585	0.507113	0.400257	0.627013	0.831832	0.615577	0	0.217556	0.271347	0.258353	1.67779	0.140222	-0.465457	0.03155	0.859451	1
CG11586	15.0443	18.8121	17.7654	18.3003	19.6984	23.6914	22.8434	25.7779	20.6682	21.9977	-0.363562	4.39157	3.92742	0.0506554	0.269245
CG11588	0	0	0	0	0	0	0	0	0	0	0	-1.30545	0	1	1
CG11590	6.25439	9.20591	9.1962	7.20921	8.92586	10.6741	10.6602	13.0246	9.04235	8.20254	-0.336151	3.29748	3.68641	0.0581277	0.292476
CG11593	49.359	51.433	44.309	49.9099	44.0137	43.2173	39.5952	46.943	46.5035	45.114	0.11265	5.54131	2.11684	0.149278	0.501503
CG11594	31.61	23.6152	68.7625	31.3323	33.8567	37.2293	68.3125	33.9184	32.0357	20.8792	-0.0213695	5.86694	0.00650811	0.935887	1
CG11596	21.6368	19.4125	20.9004	18.3003	25.8542	20.8276	23.9311	21.9791	22.4767	17.3372	-0.006703	4.46541	0.00298124	0.968552	1
CG11597	7.09958	7.40475	6.89715	8.59559	6.46355	6.50862	6.52667	5.69828	8.26729	5.59264	0.164486	2.75985	0.634552	0.427854	0.834607
CG11598	0	0	0	0	0	0	0	0	0	0	0	-1.18425	0	1	1
CG11600	0	0	0	0	0	0	0	0	0	0	0	-1.25488	0	1	1
CG11601	25.0176	26.8172	26.5436	24.1231	22.4685	19.5259	33.286	17.6375	22.735	19.7607	0.145417	4.69927	1.32485	0.25287	0.619617
CG11608	0	0	0	0	0	0	0	0	0	0	0	-1.30545	0	1	1
CG1161	75.2217	88.4568	88.8269	82.9059	78.486	91.3811	114.869	105.011	90.9402	96.1934	-0.268063	6.3586	10.4123	0.00176401	0.0313863
CG11617	13.354	10.6068	7.73317	12.4775	9.84922	10.4138	12.8358	12.7533	10.0758	12.6767	-0.120917	3.28775	0.516018	0.474466	0.887839
CG11619	7.26862	9.60616	9.4052	8.04104	9.84922	8.59138	8.26712	6.24098	6.71717	8.57538	0.189259	3.33613	1.06672	0.304544	0.6883
CG11626	1.18326	1.4009	1.46303	0.554554	1.53894	1.30172	0.870223	1.89943	2.58353	1.11853	-0.294449	1.49975	0.784825	0.466997	0.881058
CG11629	0	0	0	0	0	0	0	0	0	0	0	-1.30545	0	1	1
CG11630	0	0.400257	0.209004	0	0.307788	0	0	0.271347	0	0	1.48932	-1.16048	1.976	0.18365	0.571493
CG11634	0	0	0	0	0	0	0	0	0	0	0	-1.29804	0	1	1
CG11635	1.01423	0.600385	0.418009	0.554554	0.923365	0.52069	0.652667	0	1.55012	0.559264	0.0969942	-0.540043	0.01546	0.901334	1
CG11638	47.8377	50.0321	49.1161	51.2963	57.8642	50.5069	46.7745	57.2542	42.6282	60.9598	-0.0155084	5.76561	0.0158454	0.900118	1
CG11652	16.9038	18.6119	16.5114	16.0821	15.3894	16.4017	17.1869	16.0095	17.0513	16.5915	0.00802555	4.45438	0.0048886	0.944419	1
CG11655	25.6937	26.0167	26.9616	26.3413	22.1608	25.5138	22.6258	24.6926	21.4433	22.3706	0.128863	4.53852	1.12096	0.292636	0.673016
CG11656	0	0	0	0	0	0	0	0	0	0	0	-1.16532	0	1	1
CG11658	85.8711	89.6575	85.0648	87.6196	85.8729	86.1742	98.5528	109.081	81.8978	93.3971	-0.111839	6.61518	2.22734	0.139198	0.480669
CG11659	0	0	0	0	0	0	0	0	0	0	0	-1.2632	0	1	1
CG11663	0	0	0	0	0	0	0	0	0	0	0	-1.30545	0	1	1
CG11664	0	0	0	0	0	0	0	0	0	0	0	-1.30545	0	1	1
CG11665	126.44	122.078	125.403	112.575	113.574	95.0259	110.736	92.8006	96.6239	101.04	0.274394	6.74813	5.96092	0.0166475	0.137929
CG11666	0	0	0	0	0	0	0	0	0	0	0	-1.2982	0	1	1
CG11668	5.57824	5.00321	6.89715	4.99099	7.69471	6.76897	9.3549	5.96963	6.20047	7.8297	-0.279709	3.18321	1.86051	0.176078	0.55765
CG11670	0	0	0	0	0	0	0	0	0	0	0	-1.26917	0	1	1
CG11671	0	0	0	0	0	0	0	0	0	0	0	-0.943543	0	1	1
CG11672	0	0	0	0	0	0	0.217556	0.81404	0	0	-3.09832	-0.344313	1.47408	0.232792	0.613612
CG11674	0.338075	0.200128	0	0.554554	0	0.260345	0.435112	1.62808	0.258353	0.559264	-1.37134	1.647	1.96269	0.164775	0.534043
CG11679	4.22594	5.6036	4.8071	6.1001	5.54019	7.28966	10.4427	5.42694	6.45882	6.89759	-0.493573	2.81822	5.63717	0.0197787	0.153878
CG11686	24.5105	24.6158	26.5436	21.6276	24.6231	21.0879	27.6296	15.4668	20.1515	15.1001	0.295473	4.32082	2.47021	0.119645	0.439913
CG11693	0.845188	0.200128	0.209004	0.277277	0.923365	0.260345	0.435112	0.542694	1.29176	0.372843	-0.219621	-0.640104	0.0890983	0.766306	1
CG11694	0	0	0	0	0	0	0	0	0	0	0	-1.30545	0	1	1
CG11695	15.0443	15.4099	14.6303	18.5776	17.2361	24.4724	20.2327	21.7077	22.4767	21.6249	-0.455082	4.18668	7.40161	0.00786586	0.0847934
CG11696	12.8469	12.8082	14.0033	13.3093	16.3128	15.881	11.9656	15.1954	13.4343	16.5915	-0.0842221	3.85042	0.363706	0.548021	0.953903
CG11697	0	0	0	0	0	0	0	0	0	0	0	-1.28335	0	1	1
CG11698	0	0	0	0	0	0	0	0	0	0	0	-1.25524	0	1	1
CG11699	22.9891	28.4182	27.1706	25.7868	23.6997	30.2	40.2478	30.1195	32.0357	30.946	-0.353195	4.8116	9.14449	0.00327661	0.0475351
CG11700	2.02845	1.60103	2.92606	1.66366	2.15452	1.30172	2.82823	1.62808	0.775058	0.745686	0.508037	1.37136	1.65747	0.201353	0.603372
CG11703	0	0	0	0	0	0	0	0	0	0	0	-1.30545	0	1	1
CG11710	19.7774	20.8134	19.4374	18.023	23.0841	21.0879	20.0151	18.4516	18.8598	24.0484	-0.0250547	4.49104	0.0493622	0.824697	1
CG11714	0	0.400257	0.209004	0	0.307788	0	0	0	0.258353	0	1.49346	-0.707026	1.79478	0.183827	0.571536
CG1172	25.6937	26.8172	24.6625	24.4004	29.5477	24.2121	18.7098	26.0493	19.6348	22.557	0.238176	4.90677	4.93019	0.0289848	0.193854
CG11722	18.9322	17.4112	15.8843	13.8639	17.5439	16.4017	25.0189	18.4516	12.4009	21.252	-0.164103	3.93336	1.35288	0.24795	0.613612
CG11723	18.9322	18.2117	17.1384	17.1912	13.5427	19.5259	26.3243	16.8235	19.1181	21.0656	-0.270797	4.32976	6.00076	0.0162998	0.136592
CG11726	0	0	0	0	0	0	0	0.271347	0	0	-1.52674	-1.28351	1.65586	0.229901	0.613612
CG11737	41.2452	38.8249	37.8298	34.1051	36.319	37.2293	36.9845	36.0891	31.2607	33.5559	0.108282	5.17339	0.913707	0.341776	0.733716
CG11739	61.5297	70.8455	103.039	58.7828	66.4823	72.8966	104.209	67.294	71.5637	60.9598	-0.0619482	6.45832	0.16458	0.685968	1
CG11741	3.38075	2.60167	5.43412	3.32733	1.23115	3.38448	7.17934	3.25616	0.516706	1.49137	0.0364754	1.97037	0.00399245	0.949763	1
CG11752	73.5314	79.6511	74.6146	71.2602	69.2524	78.1035	118.568	86.0169	75.439	92.0922	-0.290221	6.17695	4.6854	0.0331534	0.211421
CG11753	22.313	20.8134	24.0355	24.955	26.4698	22.65	31.5456	19.537	20.4099	21.6249	0.02606	4.51148	0.0355949	0.998021	1
CG11755	6.93054	5.80372	7.94217	6.93193	6.46355	6.76897	6.74423	6.51232	4.13364	5.77906	0.186582	2.65281	0.867755	0.35415	0.748058
CG11756	0	0	0	0	0	0	0	0	0	0	0	-1.24246	0	1	1
CG11760	0.169038	1.00064	0.836018	0.554554	0.307788	0.52069	0.652667	1.08539	1.03341	0.186421	-0.20788	0.43335	0.141297	0.738457	1
CG11762	0	0	0	0	0	0	0	0	0	0	0	-1.24226	0	1	1
CG11768	0	0.400257	0.418009	0	0	0	0	0	0	0.186421	1.49687	-0.798798	1.46132	0.229988	0.613612
CG11771	72.3481	72.6466	61.6563	65.1601	60.3265	61.9621	63.0912	61.053	70.0136	73.0772	0.013949	5.98614	0.0389991	0.84391	1
CG11777	5.74728	6.60424	6.89715	6.37738	4.92461	5.98793	6.52667	5.69828	4.65035	8.20254	-0.0305793	2.55969	0.0211939	0.884588	1
CG11779	60.1774	53.8345	50.7881	61.2783	47.7072	53.1104	64.6141	61.5957	51.6706	60.9598	-0.0923464	5.66048	1.24772	0.267058	0.639365
CG11781	9.63515	12.2078	12.3313	12.4775	11.696	13.0172	16.7518	9.76849	8.00894	11.3717	-0.0253154	3.50468	0.0242061	0.876721	1
CG11786	0.169038	0	0	0	0	0	0	0	0.258353	0	-0.0846856	-1.10953	0.00393452	0.969295	1
CG11788	4.39498	3.60231	6.06113	3.05005	7.07913	4.42586	6.30912	5.42694	5.42541	5.77906	-0.194197	2.24569	0.685818	0.409852	0.814703
CG11790	54.092	52.8339	53.0871	45.7507	48.3228	47.1224	69.4003	45.5863	49.6037	50.893	-0.0471515	5.63097	0.266838	0.606769	0.995152
CG11791	122.214	123.879	118.088	121.17	117.883	103.097	131.839	107.453	104.375	102.905	0.133987	6.82548	1.97286	0.163697	0.531785
CG11796	26.0318	49.6319	50.9971	28.8368	38.4735	28.3776	51.7783	35.0037	22.735	13.2359	0.365695	6.19024	2.06265	0.154527	0.512851
CG11802	19.6084	23.415	25.2895	26.8959	25.5464	30.981	34.8089	27.1347	23.2517	33.9287	-0.324142	4.67915	7.05518	0.00939757	0.0949808
CG11807	41.9213	45.8294	42.6369	35.2142	40.9358	42.1759	53.0836	38.8026	40.8197	41.572	-0.06653	5.39831	0.53195	0.467743	0.881273
CG11808	3.54979	1.20077	3.13507	2.77277	2.46231	6.24828	4.78623	2.71347	5.94211	4.66054	-0.877669	2.03587	8.87207	0.00374985	0.0521395
CG11811	30.2577	31.22	27.5886	29.9459	25.5464	23.1707	30.8929	26.3206	23.2517	28.1496	0.132875	4.7097	1.62124	0.206304	0.612613
CG11815	0	0	0	0	0	0	0	0	0	0	0	-1.30545	0	1	1
CG11816	0	0.400257	0	0	0	0	0	0	0.258353	0	0.639016	-0.889266	0.258204	0.612702	0.996777
CG11825	0.507113	1.00064	0.836018	1.10911	0.923365	0.260345	1.30533	0.81404	0.516706	0.559264	0.279664	1.12931	0.319606	0.597285	0.989919
CG11828	0.845188	1.00064	0.627013	0	0.923365	0.260345	0.652667	0.271347	0.775058	0.559264	0.426171	-0.255339	0.443232	0.507325	0.92104
CG11835	21.4678	18.4118	21.1095	24.6777	29.5477	30.7207	24.5838	22.7931	28.6772	28.1496	-0.238203	4.29585	1.74026	0.19056	0.584534
CG11836	3.88787	3.80244	3.34407	1.10911	3.69346	2.86379	5.22134	2.71347	4.392	3.35559	-0.209751	2.09792	0.480804	0.489902	0.90478
CG11837	5.4092	4.40283	3.55308	4.43644	4.30904	6.24828	7.3969	5.69828	6.97552	3.72843	-0.424368	2.53133	4.04887	0.0472881	0.259128
CG11839	3.71883	3.00193	3.34407	3.88188	5.54019	2.86379	6.52667	4.34155	3.10023	6.15191	-0.282436	2.27813	1.51616	0.221513	0.613612
CG11841	15.8895	20.8134	39.2928	12.4775	18.4673	21.3483	26.1067	16.8235	18.8598	15.1001	0.132167	4.62547	0.265017	0.607997	0.995152
CG11842	5.57824	4.2027	28.2156	3.32733	4.61682	10.4138	21.7556	8.6831	3.61694	3.16916	-0.0209333	4.35199	0.0019259	0.965096	1
CG11843	0.507113	0.600385	0.836018	0	0.307788	1.82241	1.08778	0.271347	3.10023	0.559264	-1.44391	0.564365	6.78045	0.0108326	0.104076
CG11851	16.2276	13.4086	16.0933	14.1411	14.1583	7.55	12.6182	13.5673	9.8174	12.8631	0.389188	3.68715	3.959	0.0497557	0.266409
CG11852	4.90209	4.00257	4.38909	6.1001	7.69471	4.68621	4.56867	4.0702	5.16706	1.86421	0.404169	2.79312	2.22148	0.139712	0.48165
CG11854	0.338075	0.600385	0	0.831832	0.615577	0.260345	0.217556	1.08539	0.258353	1.11853	-0.384626	0.270091	0.378157	0.540193	0.948682
CG11857	94.6611	91.0584	91.544	71.8148	72.638	80.7069	98.7703	79.776	78.0225	79.4155	0.0204022	6.43884	0.0766352	0.782566	1
CG11858	4.39498	5.80372	3.76208	6.93193	5.84798	10.6741	8.91979	10.8539	7.49223	8.38896	-0.805995	3.01654	14.2485	0.000291749	0.00979937
CG11864	0	0	0	0	0	0	0	0	0	0	0	-1.30545	0	1	1
CG11865	0	0	0	0	0	0	0	0.271347	0	0	-1.52674	-1.27661	1.73427	0.229901	0.613612
CG11873	201.662	213.137	203.57	200.471	203.14	176.774	90.0681	187.229	204.099	211.961	0.232455	7.52608	4.95585	0.0285812	0.192492
CG11876	246.626	265.771	272.333	268.404	273.316	314.497	382.246	309.878	297.622	337.609	-0.30836	8.14185	9.61766	0.0025963	0.0412033
CG11878	0	0.200128	0.209004	0	0	0	0	0.81404	0.258353	0	-0.943339	-0.355931	0.629686	0.429625	0.837081
CG11880	67.446	70.0449	64.5824	64.8829	69.8679	66.9086	68.3125	65.3946	70.7887	68.2302	-0.0122483	6.04937	0.0232988	0.879035	1
CG11882	2.87364	2.40154	2.50805	3.32733	1.53894	3.12414	3.48089	1.89943	1.29176	2.42348	0.0503343	2.328	0.0423973	0.850895	1
CG11883	105.141	114.273	99.2771	97.8789	107.726	98.6707	89.633	101.212	100.758	100.481	0.0959011	6.83847	1.85654	0.176535	0.558309
CG11885	5.91632	5.00321	7.31516	6.37738	5.2324	5.72759	7.61445	4.88424	6.20047	6.89759	-0.0759524	2.50323	0.113758	0.736716	1
CG11889	0	0	0	0	0	0	0	0	0	0	0	-1.29058	0	1	1
CG11891	0	0	0	0	0	0	0	0	0	0	0	-1.30545	0	1	1
CG11892	1.52134	1.60103	1.46303	2.21822	1.84673	2.3431	4.78623	6.51232	3.61694	2.6099	-1.19812	1.34934	9.16152	0.00324918	0.0473011
CG11893	0	0	0	0	0.307788	0	0.435112	0	0	0	-0.761706	1.96362	0.580935	0.528923	0.939303
CG11897	46.3163	43.628	46.399	52.6827	52.0162	45.3	31.7631	38.8026	49.087	44.5547	0.199981	5.56421	2.4272	0.122869	0.446401
CG11898	0	0	0	0	0	0	0	0	0.258353	0	-1.52201	-0.935074	1.53832	0.229901	0.613612
CG11899	28.7364	26.417	47.235	23.2913	31.3944	40.3535	54.1714	28.4914	37.9779	28.8953	-0.270743	5.8856	1.11481	0.293957	0.674672
CG11902	30.2577	34.0218	32.3957	34.3824	35.0879	30.4604	23.9311	36.6318	30.4856	33.3694	0.0999804	4.96367	0.950809	0.332212	0.72182
CG11905	0	0.600385	0.418009	0.277277	0.923365	0	0.217556	0.271347	0.516706	0.186421	0.757093	-0.457943	0.715713	0.39987	0.804284
CG11906	14.1992	9.80629	13.5853	16.3594	11.0804	12.2362	10.2251	13.8387	13.4343	12.3038	0.070876	3.77375	0.228857	0.63357	1
CG11911	0	0	0	0	0	0	0	0	0	0	0	0.885354	0	1	1
CG11912	0	0	0	0	0	0	0	0	0	0	0	-0.879899	0	1	1
CG11913	0.507113	0	0	0	0.307788	0.52069	0.217556	0.542694	0	0.372843	-0.832771	-0.568715	0.848565	0.359501	0.753839
CG11920	6.76151	7.20462	9.4052	6.93193	7.38692	6.24828	13.2709	8.1404	6.97552	6.71117	-0.13714	3.05901	0.508423	0.477727	0.89095
CG11927	10.8184	14.009	11.0772	16.0821	14.466	15.3603	19.1449	14.6527	16.2762	16.5915	-0.318063	3.83168	5.92056	0.0170076	0.139454
CG11929	0	0	0	0	0	0	0	0	0	0	0	-1.26525	0	1	1
CG11951	9.29707	14.8095	16.3024	9.98198	10.157	9.37242	12.6182	8.6831	15.7595	7.08401	0.192598	3.97554	0.852632	0.358357	0.752462
CG11961	35.1598	33.8217	39.7109	32.996	28.6243	30.7207	36.5494	29.0341	34.6193	31.5052	0.0717404	5.13933	0.51917	0.473124	0.886617
CG11964	13.354	15.2098	18.3924	18.3003	20.9296	26.5552	22.1907	21.7077	24.8019	23.4891	-0.473548	4.34834	6.71674	0.0111971	0.106598
CG11966	0	0	0.209004	0	0	0	0	0	0.258353	0	-0.0627779	-1.14771	0.00214276	0.969295	1
CG11970	41.2452	38.6248	43.2639	46.5826	42.167	48.4241	30.2403	48.8424	48.5703	44.5547	-0.0572842	5.37971	0.354743	0.552984	0.958738
CG11975	32.4552	32.2207	35.7398	33.5505	29.8555	28.1172	40.4654	30.6622	31.7774	28.3361	0.0404878	5.09765	0.134687	0.71451	1
CG11977	0	0	0	0	0.307788	0	0	0	0	0	1.4921	-1.19954	1.63181	0.248344	0.613612
CG11980	25.3556	23.6152	24.8715	23.014	26.4698	22.65	36.5494	27.406	29.4522	24.794	-0.192976	4.61669	2.36377	0.127804	0.456657
CG11982	43.2736	44.2284	45.981	39.0961	40.3203	54.6724	51.1256	50.1992	48.312	51.0795	-0.259948	5.52815	7.89152	0.00613018	0.0717562
CG11983	4.56402	3.60231	3.97109	3.6046	2.77009	3.64483	5.00378	3.25616	1.55012	5.03338	-0.00228619	2.05235	8.32836e-05	0.992739	1
CG11984	148.922	148.295	159.888	170.248	205.91	204.631	146.85	195.641	191.181	200.589	-0.173935	7.45499	2.22283	0.139593	0.481434
CG11985	9.80418	13.2085	8.56918	11.3684	12.3115	8.85173	13.0533	10.5825	10.3341	11.931	0.000434494	3.54583	7.00194e-06	0.997895	1
CG11986	4.0569	5.00321	5.43412	7.48649	7.38692	4.16552	6.09156	5.15559	5.42541	6.33833	0.0726734	2.66241	0.134257	0.930589	1
CG11997	0.845188	1.80116	1.46303	1.38639	0.615577	2.60345	2.39311	0	0.258353	1.67779	-0.19353	0.440799	0.151468	0.698085	1
CG11999	17.5799	15.61	20.2734	14.1411	19.3907	16.1414	25.6716	17.3662	15.7595	20.3199	-0.136658	4.02638	0.810233	0.370531	0.768681
CG12003	0	0	0	0	0	0	0	0	0	0	0	-1.29152	0	1	1
CG12004	178.842	182.517	173.265	177.735	161.897	128.09	162.732	151.683	140.802	153.238	0.247185	7.28193	9.95805	0.00219873	0.036414
CG12006	53.2469	56.036	44.309	48.5235	48.9383	48.1638	46.5569	45.3149	46.5035	43.4362	0.128729	5.69449	2.7033	0.103743	0.402063
CG12007	23.1582	19.2123	24.8715	24.1231	23.3919	26.0345	29.5876	23.3358	29.1939	24.2348	-0.207866	4.60522	3.90178	0.0513989	0.271802
CG12009	0	0	0	0	0.307788	0.260345	0	0	0	0.186421	-0.733054	-1.05345	0.412689	0.528923	0.939303
CG12010	5.07113	8.20527	8.15118	4.71371	6.15577	8.59138	6.09156	6.78367	5.42541	4.84696	0.042085	2.68208	0.0353167	0.85137	1
CG12011	0.338075	0	0	0.554554	0.923365	0.52069	0.652667	0	0.775058	1.30495	-1.02244	0.134776	1.14293	0.287986	0.667748
CG12012	27.2151	29.4189	33.6497	25.2322	24.6231	21.6086	32.8509	27.6774	24.0268	21.9977	0.133296	4.7813	1.30311	0.256772	0.625095
CG12014	5.24017	5.00321	6.27013	4.71371	5.54019	8.59138	10.4427	5.96963	8.26729	9.13465	-0.667987	3.22013	15.5522	0.000161784	0.00640873
CG12016	0.338075	0.400257	0	0.277277	0.615577	0	0	0	0	0.186421	2.25383	-0.632519	3.2384	0.0753905	0.344081
CG12017	0.169038	0.400257	0.209004	0	0.307788	0	0.435112	0	0.258353	0	0.570146	-0.546845	0.297522	0.586973	0.986409
CG12018	4.39498	6.20398	3.55308	6.1001	4.00125	6.24828	3.69845	4.88424	6.71717	5.77906	-0.168957	2.45828	0.448482	0.504827	0.918605
CG12020	0	0	0	0	0	0	0	0	0	0	0	-1.2834	0	1	1
CG12024	72.1791	79.2509	75.2416	67.3784	66.1745	76.8017	89.8505	72.1783	71.3054	74.3821	-0.0929224	6.15795	1.61885	0.206635	0.612866
CG12025	218.228	220.542	189.358	197.144	149.277	149.178	187.316	142.457	137.702	170.576	0.308483	7.52963	11.311	0.00114636	0.0240894
CG12027	0	0	0	0	0.615577	0	0.217556	0	0.258353	0	-0.00816107	-1.13404	0.000243694	0.987597	1
CG12034	23.3272	27.2175	24.8715	23.5686	24.9308	24.7328	26.3243	21.7077	20.4099	24.4212	0.0732538	4.59472	0.354625	0.55305	0.958738
CG12035	0	0	0	0	0	0	0	0	0	0	0	-1.29805	0	1	1
CG12038	33.9766	39.6254	33.2317	39.0961	45.2449	47.1224	51.7783	40.9734	35.911	44.5547	-0.211658	5.18618	4.28107	0.0415003	0.243229
CG12042	25.0176	25.4163	26.3346	28.5596	26.7776	28.8983	26.9769	27.6774	29.9689	36.1658	-0.185861	4.81574	3.692	0.0579414	0.291924
CG12050	21.6368	23.6152	16.7204	17.7457	21.2374	17.9638	19.58	16.2808	12.6593	18.0829	0.253489	4.27887	3.22193	0.0761238	0.345916
CG12054	150.613	154.299	138.361	152.502	140.351	140.847	104.427	142.457	144.936	142.24	0.126032	7.22641	2.73892	0.101527	0.399724
CG12056	13.354	14.2091	13.3763	18.8549	16.3128	17.4431	21.3205	16.2808	21.1849	19.015	-0.335951	4.09513	7.75397	0.00657292	0.0749456
CG12057	0	0	0	0	0	0	0	0.271347	0	0	-1.51924	0.826683	1.13306	0.290936	0.671492
CG12061	0	0	0	0	0	0.260345	0	0	0	0.186421	-2.2243	-1.18131	3.44949	0.089522	0.37624
CG12065	57.3038	58.4375	69.5985	56.5646	61.2499	74.1983	61.7858	80.59	73.6305	69.3488	-0.244485	5.94661	6.39231	0.0132627	0.119787
CG12069	0	0	0	0	0	0	0	0	0	0	0	-1.27714	0	1	1
CG12071	105.479	103.066	100.113	107.861	124.039	115.853	94.4192	130.246	121.426	133.291	-0.140496	6.67601	1.03635	0.311488	0.698427
CG12075	51.3874	48.4311	40.9649	47.969	35.0879	48.4241	30.4578	35.8178	45.2117	46.7918	0.119414	5.55366	1.34774	0.248843	0.613948
CG12078	0	0	0.209004	0	0	0	0	0	0	0	1.45948	-1.26954	1.74411	0.248344	0.613612
CG1208	34.8218	27.2175	19.2284	28.005	22.4685	21.6086	27.412	21.7077	22.9934	18.2693	0.241409	4.38812	1.58483	0.211428	0.613612
CG12081	22.651	22.6145	23.8265	24.1231	22.4685	26.0345	27.1945	31.4762	26.0936	26.6583	-0.247779	4.6548	6.09934	0.0154721	0.131975
CG12082	23.3272	29.4189	33.2317	32.1642	32.9333	42.4362	30.4578	35.0037	37.4612	34.6744	-0.256726	4.90229	4.06313	0.0469087	0.25825
CG12084	90.9422	98.8634	102.412	97.3243	101.878	102.836	67.6599	92.8006	102.049	106.26	0.058962	6.57966	0.65721	0.419754	0.825645
CG12090	149.598	160.703	150.901	160.266	184.673	163.497	104.427	167.692	172.838	175.795	0.0389474	7.43769	0.251889	0.617013	1
CG12091	182.223	178.314	184.969	173.576	190.521	238.997	236.048	209.751	196.865	231.349	-0.291532	7.60576	17.505	6.81205e-05	0.00352772
CG12093	26.7079	23.2149	32.3957	25.2322	34.1645	29.1586	37.4196	32.0189	25.5769	27.5904	-0.103685	4.87401	1.12736	0.291273	0.671578
CG12096	21.4678	22.6145	21.9455	20.2412	23.6997	22.3897	20.6678	24.9639	21.96	25.1669	-0.0676254	4.37147	0.327004	0.5689	0.97199
CG12099	181.546	173.111	184.76	181.617	203.756	216.867	202.544	194.556	207.457	212.52	-0.161671	7.60514	5.39351	0.022542	0.166032
CG12104	15.0443	10.2065	12.7493	14.4184	10.4648	14.0586	20.6678	11.6679	10.3341	12.3038	-0.134407	3.83348	0.658647	0.419249	0.825323
CG12105	3.04268	3.00193	3.97109	4.15916	7.07913	5.72759	3.04578	4.88424	2.58353	3.91485	0.0422872	2.40244	0.0204359	0.985657	1
CG12106	12.5088	15.61	13.1673	12.7548	12.0037	12.7569	15.664	11.3966	11.8842	15.1001	-0.0195299	3.63862	0.0193996	0.889548	1
CG12107	23.1582	24.6158	25.7076	22.7367	24.9308	25.7741	36.7669	34.1897	25.3186	32.0645	-0.349422	4.79313	8.86312	0.00376656	0.0522415
CG12111	0	0.400257	0.209004	0.277277	0.307788	0	0	0	0	0.186421	1.82637	-0.877672	2.45074	0.121093	0.44282
CG12112	6.93054	7.00449	7.52416	8.04104	9.23365	8.07069	6.09156	3.79886	7.75058	5.77906	0.287788	2.83742	1.62502	0.20578	0.611491
CG12115	0.338075	0	0	0	0.615577	0.260345	0.217556	0	0	0	0.775844	-1.07378	0.53219	0.468384	0.882083
CG12116	79.6167	35.0225	183.506	61.001	67.7134	99.1914	187.533	95.2427	104.633	56.1128	-0.341977	7.16738	0.963423	0.329042	0.72182
CG12118	40.569	44.0283	43.2639	41.8689	51.7084	43.7379	55.0416	42.3301	46.7618	42.8769	-0.0633435	5.38536	0.369717	0.54474	0.951233
CG12119	18.7632	18.4118	18.1834	22.1822	36.9346	27.0759	37.8547	31.2049	14.2094	40.6399	-0.430239	5.13091	1.35645	0.247332	0.613612
CG12121	101.254	99.0636	92.798	86.7878	92.3365	84.3517	111.171	101.212	88.615	96.3799	-0.0280888	6.51305	0.193013	0.661508	1
CG12123	10.4803	10.6068	12.9583	12.4775	13.2349	7.81035	16.0991	12.7533	8.52564	10.8124	0.0804172	3.39824	0.326028	0.682577	1
CG12125	26.5389	26.8172	27.3796	28.8368	19.6984	22.9103	26.3243	22.7931	26.0936	29.0817	0.0239548	4.73819	0.0456251	0.831358	1
CG12126	0	0	0	0	0	0	0	0	0	0	0	-1.30545	0	1	1
CG12128	15.3824	14.009	18.8104	19.964	14.7738	19.0052	12.1831	15.7381	15.5012	15.8458	0.0837009	4.20619	0.39874	0.529393	0.939684
CG12129	14.8753	13.6087	13.3763	14.6957	11.0804	12.4966	20.0151	14.3814	16.0179	16.0322	-0.221299	3.95387	2.01614	0.1592	0.521672
CG1213	180.025	151.097	167.413	135.034	144.353	184.845	164.037	140.829	179.555	157.526	-0.0861117	7.52475	0.384104	0.537032	0.945852
CG12133	0	0	0	0	0	0	0	0	0	0	0	-1.2276	0	1	1
CG12134	3.71883	6.00385	5.85213	3.88188	3.38567	6.76897	4.56867	4.6129	5.16706	3.91485	-0.105937	2.53503	0.168328	0.693266	1
CG12147	0	0	0	0	0	0	0	0	0	0	0	-1.25635	0	1	1
CG12155	22.9891	25.6164	31.1417	27.1732	29.5477	34.8862	30.4578	28.7628	33.3275	28.7089	-0.196733	4.85911	3.91109	0.0511275	0.270893
CG12158	273.503	244.757	166.577	275.059	266.545	263.99	354.398	289.798	221.408	336.304	-0.258639	8.07607	2.89396	0.0924766	0.383115
CG12159	19.6084	19.4125	21.1095	25.2322	24.3153	19.2655	27.1945	16.8235	21.4433	18.4557	0.0777459	4.49437	0.477477	0.604211	0.993574
CG12162	52.5707	52.4336	45.772	47.4144	55.0941	63.7845	68.5301	67.8367	53.479	63.9425	-0.327018	5.67106	11.5632	0.0010169	0.0222931
CG12163	223.806	236.352	274.214	233.19	261.62	289.243	299.139	287.356	293.23	271.616	-0.229153	8.00131	6.13853	0.0151554	0.130404
CG12164	0.169038	0	0	0.277277	0.307788	0.52069	0.652667	0.271347	0	0.186421	-1.14235	0.686846	1.69588	0.196257	0.593681
CG12170	24.3414	22.0141	23.4085	21.3503	22.1608	29.6793	29.8051	27.406	28.9355	26.6583	-0.327349	4.5868	8.03266	0.00570807	0.0690375
CG12171	16.7347	12.408	20.0644	14.1411	14.466	18.4845	19.58	13.296	18.8598	17.5236	-0.170385	4.07034	1.135	0.289654	0.67016
CG12173	12.0017	13.2085	12.9583	9.7047	16.3128	14.8397	18.4922	14.3814	15.2428	13.6088	-0.258964	3.91887	3.48875	0.065147	0.313352
CG12177	21.8059	25.0161	22.7815	25.7868	25.8542	35.6672	43.076	36.0891	32.2941	37.8435	-0.614977	4.71396	21.9458	1.025e-05	0.00106492
CG12179	4.56402	5.80372	4.5981	5.54554	6.46355	4.42586	4.56867	8.1404	5.42541	6.71117	-0.13072	2.80912	0.349881	0.555712	0.960578
CG1218	7.77573	9.80629	8.77819	11.0911	7.38692	7.55	9.3549	12.482	8.26729	10.8124	-0.115761	3.17584	0.301122	0.584583	0.986409
CG12182	16.7347	16.0103	17.1384	13.5866	12.0037	14.5793	15.4465	14.11	13.951	14.9137	0.0575155	3.89928	0.196723	0.658478	1
CG12184	0.169038	0	0.209004	0.277277	0	0.260345	0.217556	0	0	0.186421	-0.0559498	-0.887792	0.00357525	0.952479	1
CG12194	107.001	111.872	104.711	113.406	110.804	91.3811	102.686	102.569	82.1562	116.327	0.143848	6.65929	2.35473	0.128525	0.457899
CG12200	0	0	0	0.277277	0.307788	0	0	0	0	0	2.2219	-1.01058	3.07968	0.102566	0.399724
CG12203	110.551	122.278	107.846	135.866	124.962	149.178	176.22	133.503	124.526	149.696	-0.287745	6.92512	6.89395	0.0102138	0.100138
CG12204	3.38075	2.8018	2.29905	2.4955	4.00125	6.76897	5.65645	4.34155	4.392	4.28769	-0.765055	2.22231	4.87078	0.0299425	0.198229
CG12206	0.845188	1.00064	0.627013	0	0.307788	1.04138	0.435112	0.542694	0.516706	0.186421	0.184773	0.60611	0.108126	0.743077	1
CG12207	106.156	93.8602	91.335	101.483	88.3352	89.819	102.034	89.8158	86.5482	95.0749	0.0547923	6.58759	0.784202	0.378295	0.778858
CG12209	0	0	0.209004	0	0	0	0	0.542694	0.258353	0.559264	-2.12203	-0.951016	4.00591	0.0484507	0.262107
CG12213	81.8142	86.0552	82.1388	83.1832	84.6418	80.7069	76.1445	79.2333	84.9981	85.9403	0.0373751	6.2462	0.199181	0.656489	1
CG12219	15.0443	18.0116	14.4213	14.973	15.6972	21.0879	14.7938	16.0095	20.1515	17.1508	-0.186788	3.94798	1.60323	0.20882	0.613612
CG12224	8.11381	5.20334	10.6592	5.82282	5.54019	6.76897	9.3549	5.15559	5.42541	4.66054	0.187037	2.92525	0.460753	0.49907	0.912544
CG12229	0	0.400257	0	0	0	0.52069	0	0	0	0	-0.0931667	-0.941001	0.00527918	0.956588	1
CG12231	0	0	0	0	0	0	0	0	0	0.372843	-2.19414	-1.20714	2.82212	0.100932	0.399724
CG12236	46.9925	42.2271	43.8909	45.4735	48.9383	42.1759	33.5036	44.2295	58.9044	49.4017	-0.00482131	5.47183	0.00219337	0.962753	1
CG12237	63.051	72.2464	67.9265	75.4194	65.8667	75.2397	82.6712	78.1479	75.9557	82.5847	-0.197315	6.13705	7.09395	0.00921165	0.0936108
CG12239	202.169	244.957	272.124	277.277	603.881	473.307	313.28	454.777	470.46	523.285	-0.485309	8.52481	2.80877	0.0973334	0.395938
CG12241	30.4268	27.4176	36.1578	31.3323	32.3178	33.5845	30.2403	29.0341	38.4946	32.8102	-0.059077	5.08259	0.417455	0.519907	0.935597
CG12253	12.3397	12.408	9.4052	11.3684	12.0037	11.4552	14.5762	10.8539	12.4009	14.9137	-0.165146	3.61126	1.0915	0.299027	0.681355
CG12256	3.88787	1.60103	1.25403	2.21822	4.92461	3.64483	2.82823	2.71347	0.775058	2.23706	0.161383	2.02262	0.164881	0.685697	1
CG12259	4.0569	6.60424	4.18009	2.77277	5.84798	8.07069	6.74423	10.3112	7.23388	8.57538	-0.79546	2.91993	11.2637	0.0011725	0.0244602
CG12262	92.8017	88.2566	155.917	89.5605	100.339	112.469	126.617	106.097	92.2319	79.2291	0.0300652	6.99319	0.0220618	0.882266	1
CG12263	30.4268	36.0231	32.3957	38.8188	32.3178	26.8155	28.7174	28.7628	34.3609	22.1841	0.273129	4.85497	5.51014	0.0211717	0.159594
CG12264	48.3448	54.0347	45.354	44.9189	59.4031	57.7966	77.6674	53.184	53.2207	64.5018	-0.28606	5.68563	10.2174	0.00193843	0.0336
CG12267	6.08535	4.80308	7.94217	5.26827	5.84798	6.24828	10.2251	8.6831	6.71717	5.77906	-0.322421	2.90103	2.79523	0.0981313	0.398022
CG12268	4.22594	6.80437	6.47914	4.15916	2.15452	4.42586	4.35112	2.98482	8.00894	5.03338	-0.0267321	2.78874	0.0105904	0.996348	1
CG12269	54.9372	56.4362	62.2833	61.2783	52.0162	64.5655	115.74	88.7304	65.3632	89.6687	-0.565221	6.07295	16.5676	0.000102909	0.00480929
CG1227	9.63515	9.00578	13.5853	9.98198	7.38692	12.4966	16.3167	13.0246	7.49223	11.1853	-0.280276	3.45997	2.31109	0.132073	0.464866
CG12272	32.7933	37.0238	32.8137	35.7688	40.6281	35.6672	34.1563	40.4307	34.8776	36.9114	-0.0271974	5.18319	0.0857301	0.770373	1
CG12278	0.169038	0	0.209004	0.554554	0	0.781035	0.652667	0.271347	0	0.559264	-1.25239	-0.556099	2.2406	0.138041	0.478435
CG12279	7.26862	8.20527	8.36018	8.59559	13.8505	12.7569	16.0991	11.9393	9.3007	10.9989	-0.425805	3.44521	8.48096	0.0045568	0.0595236
CG12288	1.69038	2.40154	1.88104	2.4955	2.15452	2.3431	2.82823	1.62808	2.84188	2.05064	-0.150472	1.28117	0.1266	0.722843	1
CG12289	0	0	0	0	0	0	0	0	0	0	0	-1.30545	0	1	1
CG12290	50.2042	48.4311	42.0099	44.3644	45.2449	46.081	27.412	40.1593	41.3364	36.9114	0.267985	5.57521	5.99905	0.0163146	0.136592
CG12299	35.6669	42.6274	37.6208	41.5916	43.7059	49.2052	34.5914	40.4307	47.0202	48.4696	-0.130004	5.3565	1.10261	0.296597	0.67785
CG12301	6.42343	4.00257	6.06113	4.99099	7.69471	9.11207	6.52667	8.1404	9.8174	7.45686	-0.493819	3.22453	3.86831	0.0523867	0.274779
CG12304	31.61	38.6248	30.0966	30.2232	32.3178	29.1586	43.076	29.3055	32.2941	33.5559	-0.0412351	4.98934	0.190267	0.663773	1
CG12307	0	0	0	0	0	0	0	0.271347	0	0	-1.52674	-1.28329	1.77919	0.229901	0.613612
CG12309	0	0	0	0	0	0	0	0	0	0	0	-1.24038	0	1	1
CG1231	5.74728	6.00385	9.4052	8.59559	4.30904	5.98793	7.61445	9.22579	6.45882	8.57538	-0.151949	2.81691	0.637607	0.426749	0.833382
CG12310	0	0	3.34407	0	0	1.56207	0	0	4.13364	0	-0.61901	0.284939	0.163561	0.687896	1
CG12316	26.7079	32.4208	25.9166	31.8869	38.1657	38.7914	23.7136	30.1195	41.0781	41.1991	-0.181138	4.98621	1.57556	0.212756	0.613612
CG12320	6.76151	6.60424	9.82321	5.26827	10.7726	7.02931	9.57246	8.1404	8.52564	9.32107	-0.1328	2.91774	0.532248	0.467619	0.881273
CG12321	13.692	14.2091	11.4952	12.7548	18.1595	14.8397	19.7976	13.296	15.2428	16.5915	-0.194815	3.71864	1.5131	0.221976	0.613612
CG12325	13.354	13.0083	11.2862	11.6456	15.3894	12.7569	12.1831	13.8387	15.2428	11.1853	-0.0097983	3.76814	0.00459934	0.987396	1
CG1233	37.6954	38.4247	40.9649	39.0961	38.4735	41.1345	33.0685	37.4459	38.4946	36.1658	0.0646484	5.3005	0.60275	0.439632	0.849559
CG12333	50.2042	48.231	52.2511	51.2963	50.7851	65.0862	73.0988	64.8519	67.9468	71.7722	-0.440615	5.87062	21.373	1.30171e-05	0.00123016
CG12338	33.4695	28.2181	48.9071	27.4504	28.9321	40.6138	47.4272	35.8178	29.9689	31.5052	-0.144615	5.39873	0.727358	0.396078	0.800145
CG1234	12.5088	16.0103	15.8843	9.98198	14.1583	11.9759	10.4427	14.9241	14.4678	10.4396	0.152027	3.8029	0.831692	0.364299	0.759973
CG12341	21.8059	19.6126	16.9294	20.5185	18.1595	15.1	24.5838	16.8235	15.2428	18.8286	0.095344	4.18665	0.564758	0.454374	0.865934
CG12343	13.8611	18.2117	17.7654	18.023	17.2361	17.4431	33.286	24.4212	19.3765	23.8619	-0.485094	4.38142	12.8236	0.000562504	0.0150542
CG12344	12.1707	15.4099	10.4502	12.2002	6.77134	14.319	17.4045	9.76849	10.3341	13.6088	-0.189236	4.04125	0.726265	0.396432	0.800473
CG12347	0	0	0	0	0	0	0	0	0	0	0	-1.28385	0	1	1
CG12355	58.318	59.4381	50.9971	58.2282	41.2436	37.75	63.9614	52.3699	51.4122	53.6894	0.0508883	5.65567	0.118484	0.731514	1
CG1236	14.3682	11.8076	14.8393	13.032	11.0804	16.9224	21.3205	12.2106	15.5012	14.168	-0.293985	4.02841	4.43969	0.0379855	0.23087
CG12360	83.5046	79.451	84.6468	80.4104	82.1795	66.3879	65.0492	61.3244	82.6729	65.4339	0.267743	6.27453	16.7014	9.69986e-05	0.00462249
CG12362	0.169038	0.200128	0	0.277277	0	0	0	0.271347	0	0	1.1142	-0.819014	0.869742	0.353603	0.747656
CG12374	0	0	0	0.277277	0	0	0	53.184	0	0.186421	-7.18226	4.01347	11.7781	0.000977301	0.0216894
CG12375	26.0318	25.6164	23.8265	22.1822	23.0841	23.431	34.1563	24.4212	25.3186	23.4891	-0.113197	4.63608	0.885446	0.349315	0.742532
CG12376	0	0	0	0	0	0	0	0	0	0	0	-1.24852	0	1	1
CG12379	2.87364	2.60167	3.97109	2.4955	2.77009	3.64483	3.26334	0.81404	3.10023	3.16916	0.065337	1.65678	0.050781	0.823863	1
CG12384	52.9088	43.628	62.4923	41.5916	48.9383	58.5776	89.1979	68.9221	47.7953	59.8413	-0.376514	5.91714	13.0022	0.000517691	0.0144806
CG1239	4.90209	4.40283	5.64312	5.26827	6.77134	8.59138	8.04956	6.24098	3.87529	4.66054	-0.228435	2.56457	0.801513	0.373107	0.771552
CG12391	15.3824	22.6145	18.6014	28.5596	38.4735	31.2414	30.6754	36.9032	31.7774	37.6571	-0.469384	4.84019	4.7086	0.0327324	0.209639
CG12393	24.6795	28.4182	25.2895	30.2232	32.9333	32.5431	39.16	30.6622	29.9689	26.4718	-0.172122	4.82486	1.84777	0.177549	0.560351
CG12395	0	0	0	0	0.307788	0	0	0	0	0	1.49251	-1.26917	1.71836	0.248344	0.613612
CG12398	0.169038	0	0	0	0	0	0	0.271347	0.516706	0	-1.30639	-1.11011	1.33626	0.28181	0.658542
CG12400	117.481	127.282	116.206	126.161	118.498	126.788	189.274	131.875	111.608	148.578	-0.227132	6.91478	4.60212	0.0347133	0.218372
CG12402	35.3289	44.2284	32.1867	42.1461	33.2411	30.4604	35.0265	31.2049	26.6103	30.946	0.277441	5.11907	6.65079	0.0115878	0.109262
CG12404	32.9623	34.4221	40.3379	41.037	30.7788	33.0638	40.6829	31.2049	32.0357	30.7595	0.0971128	5.08198	0.939101	0.33519	0.725537
CG12413	10.6494	9.80629	10.6592	6.65465	8.31028	10.1535	8.26712	12.2106	9.55905	13.6088	-0.210833	3.39891	1.32984	0.251986	0.618211
CG12420	0.676151	0.800514	0.418009	0	0	0.260345	0.217556	0	0.516706	0.186421	0.781085	-0.346332	1.15771	0.28491	0.662998
CG12426	0	0	0	0	0	0	0.217556	0.271347	0.516706	0	-3.09637	-1.05818	5.92084	0.0176303	0.142654
CG12428	22.1439	20.6132	27.7976	12.7548	20.314	15.881	19.3625	20.6224	18.6014	18.4557	0.167284	4.87943	0.757284	0.38657	0.787882
CG12438	0	0	0	0	0	0	0	0	0	0	0	-1.26934	0	1	1
CG12439	0	0	0	0	0	0	0	0	0	0	0	-1.29814	0	1	1
CG12446	0	0	0	0	0	0	0	0	0	0	0	-1.2484	0	1	1
CG12448	0.169038	0.200128	0	0.277277	0	0	0	0	0.258353	0	1.11809	-0.851837	0.833113	0.364012	0.759869
CG1246	0.676151	1.00064	0.209004	0.277277	0.923365	0.52069	0.217556	1.35673	0.258353	0.186421	0.345389	0.163108	0.192766	0.66171	1
CG12464	0	0	0	0	0	0	0	0	0	0	0	-1.30545	0	1	1
CG12470	1.18326	1.60103	1.46303	2.4955	1.84673	1.04138	1.30533	1.89943	1.03341	1.30495	0.353355	0.646943	0.69799	0.405744	0.810761
CG12477	0	0	0	0	0	0	0	0	0	0	0	-1.22648	0	1	1
CG12479	0	0	0	0	0	0	0	0	0	0	0	-1.29133	0	1	1
CG12480	0	0	0	0	0	0	0	0	0	0	0	-1.16784	0	1	1
CG12481	0	0	0	0	0	0	0	0	0	0	0	-1.30545	0	1	1
CG12483	0.676151	1.80116	1.67204	1.66366	1.53894	2.3431	2.82823	2.17077	2.06682	0.745686	-0.46487	1.29718	1.06441	0.305064	0.68929
CG12484	125.088	131.885	128.747	120.893	134.503	156.207	100.511	164.436	132.535	157.899	-0.150075	6.98961	4.41191	0.0385773	0.232183
CG12490	0	0	0	0	0	0	0	0	0	0	0	-1.07803	0	1	1
CG12491	0	0	0	0	0	0	0	0	0	0	0	-1.30545	0	1	1
CG12493	0.507113	0	0	0	0	0.260345	0	0.271347	0	0.372843	-0.472083	-0.747851	0.173207	0.6783	1
CG12496	0	0	0	0	0	0	0	0	0	0	0	-1.24806	0	1	1
CG12498	0	0	0	0	0	0	0	0.271347	0	0	-1.52664	-1.23493	1.65336	0.229901	0.613612
CG12499	17.918	20.0128	23.1995	16.3594	19.3907	15.881	11.3129	15.7381	19.3765	14.7273	0.33799	4.27434	3.4237	0.0676542	0.320581
CG12502	100.577	103.266	99.4861	96.4925	111.727	105.96	79.6254	125.362	108.25	121.174	-0.0792715	6.75538	1.07757	0.302113	0.685398
CG12506	0	0	0	0	0	3.38448	0	0	0.516706	0	-4.88671	1.63259	1.29729	0.261627	0.631399
CG12507	0.507113	0	0.836018	0.277277	0.307788	0.260345	0.435112	0.542694	0.516706	0	0.217728	-0.593637	0.0810939	0.776496	1
CG12511	0	0	0	0	0	0	0	0	0	0	0	-1.28365	0	1	1
CG12512	39.0477	34.8223	39.7109	38.2643	41.8592	52.85	52.8661	50.7419	43.92	46.0461	-0.34834	5.51549	9.09546	0.00335697	0.0484053
CG12516	0	0	0	0	0	0	0	0	0	0	0	-1.29089	0	1	1
CG12517	0.169038	0	0.418009	0	0	0	0	0	0	0	2.62206	-1.00964	3.67121	0.0601945	0.298759
CG12519	0	0.200128	0.209004	0.277277	0	0	0.217556	0	0	0.186421	0.449991	-1.17899	0.168752	0.697944	1
CG12520	1.3523	1.20077	0.836018	0.277277	1.53894	0.260345	0.870223	1.08539	1.29176	0.745686	0.303969	0.379263	0.3902	0.533826	0.943852
CG12521	0.169038	0	0	0	0	0	0	0.271347	0.516706	0	-1.30602	-1.0586	1.30736	0.28181	0.658542
CG12522	0.338075	1.00064	0.209004	0.277277	0	0	1.52289	0.271347	0	0.745686	-0.449348	-0.083964	0.33869	0.562657	0.967074
CG12523	0	0	0	0	0	0.52069	0	0	0	0	-2.2549	-1.23487	3.31552	0.089522	0.37624
CG12531	262.684	263.769	230.741	236.517	229.302	181.46	138.801	221.962	207.974	225.57	0.326497	7.96295	8.7424	0.00399952	0.0542972
CG12535	0.338075	0	0	0.277277	0	0	0.217556	0	0.258353	0.186421	-0.0738527	-0.84726	0.00497503	0.946844	1
CG12538	0	0	0	0	0	0	0	0	0	0	0	-1.29828	0	1	1
CG12539	0	0	0	0	0	0	0	0	0	0	0	-1.06429	0	1	1
CG12540	0	0.200128	0	0	0	0	0	0	0	0	1.45516	-1.2495	1.40998	0.248344	0.613612
CG12541	37.1883	40.0257	32.3957	36.046	31.0866	34.1052	43.9463	32.833	28.6772	37.0979	0.000442241	5.32239	1.26541e-05	0.99717	1
CG12546	0	0	0	0	0	0	0	0	0	0	0	-1.30545	0	1	1
CG12547	146.218	143.492	132.718	124.497	116.652	93.4638	126.617	100.127	89.3901	89.8551	0.411191	6.85636	9.63459	0.00257486	0.0409798
CG12560	11.6636	12.6081	13.7943	8.87287	12.9271	8.85173	15.2289	11.9393	6.20047	8.01612	0.254416	3.60512	1.74388	0.190104	0.58368
CG12567	104.465	95.061	80.6757	94.2743	84.0262	50.7673	67.6599	64.8519	52.1873	52.9437	0.670076	6.30905	18.5939	4.24301e-05	0.00258971
CG12576	107.339	106.468	114.743	109.247	120.961	89.0379	99.6406	88.4591	97.399	104.396	0.220426	6.89955	7.78608	0.00646667	0.0741893
CG12581	122.721	112.272	96.9781	119.229	108.649	92.4224	78.1025	93.886	94.0404	94.3292	0.306768	6.76455	14.0969	0.000312665	0.0102064
CG12582	59.8393	61.6396	73.9876	54.0691	55.7097	63.7845	66.137	66.2086	70.5303	56.1128	-0.0765233	6.11199	0.731134	0.39486	0.798648
CG12589	0	0	0	0	0.307788	0	0	0.271347	0.258353	0	-0.765402	-1.18775	0.428929	0.528923	0.939303
CG12590	1.3523	1.60103	1.88104	1.66366	0.307788	2.08276	0.435112	1.35673	1.55012	0.932107	0.157085	0.528099	0.113744	0.736732	1
CG12592	0	0	0	0	0	0	0	0	0	0	0	-0.938341	0	1	1
CG12594	50.3732	51.6331	52.0421	46.8599	56.0175	48.4241	41.118	51.8272	39.2696	48.8424	0.162506	5.55105	4.38634	0.0391308	0.233731
CG12605	231.92	218.34	181.416	211.84	178.825	149.438	112.476	160.909	179.297	177.846	0.391353	7.54733	13.4668	0.000417557	0.0125847
CG12607	0	0	0.209004	0	0	0	0	0	0	0	1.45953	-1.13745	1.35191	0.249949	0.615109
CG12608	17.0728	17.6113	18.8104	20.7958	24.9308	27.0759	31.328	25.7779	19.1181	22.9298	-0.358754	4.39446	6.14801	0.0150798	0.129955
CG12609	0	0	0	0	0	0	0	0	0	0	0	-1.173	0	1	1
CG12617	0	0.200128	0	0	0	0	0	0	0	0	1.45542	-0.984795	0.905647	0.346123	0.739412
CG12620	0	0	0	0	0	0	0	0	0	0	0	-1.29802	0	1	1
CG12637	0	0	0	0	0	0	0	0	0	0	0	-1.27062	0	1	1
CG12640	0	0	0.209004	0	0	0	0	0	0.258353	0.186421	-0.764297	-1.0568	0.387583	0.535362	0.944719
CG12643	4.90209	3.80244	4.18009	5.82282	4.00125	2.86379	5.87401	1.89943	2.06682	2.23706	0.579949	2.72142	2.97402	0.0881554	0.37624
CG12645	0	0.200128	0	0	0.307788	0	0	0	0	0	2.19504	-1.09544	2.75426	0.10267	0.399943
CG1265	35.6669	40.0257	31.9777	41.037	36.6268	38.0104	55.6943	39.6166	39.0113	37.8435	-0.18437	5.26507	2.08786	0.152059	0.507683
CG12655	6.59247	5.80372	3.34407	4.99099	4.00125	5.2069	6.30912	3.52751	6.97552	5.59264	-0.144249	3.01251	0.34473	0.558629	0.962939
CG12659	2.53556	1.60103	2.71706	3.6046	4.30904	1.56207	2.82823	1.62808	2.32517	1.30495	0.573119	1.68953	3.23632	0.0754829	0.344409
CG12661	0	0	0	0	0	0	0	0	0	0	0	-1.27674	0	1	1
CG12662	0	0	0	0	0	0	0	0	0.258353	0	-1.52251	-1.26239	1.99897	0.229901	0.613612
CG12672	1.18326	1.80116	1.04502	1.38639	1.84673	1.30172	1.958	2.17077	2.06682	2.79632	-0.532228	1.57464	2.2292	0.139035	0.480403
CG12674	0	0	0	0	0	0	0	0	0	0	0	-1.27761	0	1	1
CG12679	0	0	0	0	0	0	0	0	0	0	0	-1.30545	0	1	1
CG12680	0	0	0	0	0	0	0	0	0	0	0	-1.24823	0	1	1
CG12681	0	0	0	0.277277	0.307788	0.781035	0	0	0.516706	0	-1.17912	-0.955143	0.981139	0.325273	0.716844
CG12682	0	0	0	0	0	0	0	0	0	0	0	-1.22849	0	1	1
CG12684	0	0.200128	0	0	0	0.260345	0	0	0	0	-0.0679475	-1.23676	0.00273118	0.969295	1
CG12688	0	0.400257	0	0	0	0.260345	0.217556	0.271347	0	0.186421	-0.910029	-0.862322	0.757454	0.386631	0.787912
CG12689	0.338075	0.200128	0	0	0	0	0.435112	0.271347	0	0.186421	-0.457193	-0.886428	0.202688	0.653677	1
CG12691	0	0	0	0	0	0	0	0	0	0	0	-1.30545	0	1	1
CG12692	0	0	0	0	0	0	0	0	0	0	0	-1.29072	0	1	1
CG12693	0	0.200128	0.418009	0	0	0	0	0	0.258353	0	1.11493	-1.03137	0.927926	0.338335	0.729578
CG12698	0	0	0	0	0	0.52069	0	0	0	0.372843	-3.05543	-1.02949	6.17196	0.0163401	0.136592
CG12699	0	0	0	0	0	0	0	0	0	0	0	-1.23213	0	1	1
CG12702	0	0	0.209004	0	0.307788	0	0.217556	0	0.775058	0.186421	-1.16956	-0.0853266	1.11811	0.293247	0.673783
CG12708	0	0	0	0	0	0	0.217556	0.542694	0	0	-2.73026	-0.43545	3.60038	0.0618231	0.3037
CG1271	19.7774	19.2123	20.6914	21.3503	22.4685	26.8155	29.1525	26.3206	28.4188	20.3199	-0.340695	4.47957	7.75471	0.00657045	0.0749456
CG12713	2.02845	2.40154	3.55308	3.6046	2.15452	4.68621	2.61067	2.44212	2.58353	3.72843	-0.233825	1.67398	0.706657	0.402856	0.808266
CG12715	0	0	0	0.277277	0	0	0	0	0.258353	0	-0.038235	-1.1543	0.00107138	0.974006	1
CG12716	0.845188	0.800514	2.09004	0.277277	0.923365	1.30172	1.08778	1.08539	0.516706	0.745686	0.105713	2.05259	0.0524529	0.819385	1
CG12717	18.2561	21.814	15.2573	20.7958	25.2386	15.3603	11.9656	20.0797	18.6014	18.4557	0.256463	4.23802	2.69134	0.104498	0.403555
CG12721	0	0.200128	0	0.554554	0.307788	0.52069	0	0	0	0	0.800508	-0.231704	0.352009	0.554759	0.959811
CG12723	0.169038	0	0	0	0	0.260345	0.217556	0	0.258353	0	-1.28859	-0.969256	1.09401	0.298937	0.681242
CG12725	0	0	0	0	0	0.52069	0	0	0.258353	0	-2.74197	-1.24748	4.88933	0.0375692	0.229099
CG12728	12.3397	15.0096	15.2573	16.6366	15.3894	9.11207	17.8396	8.95445	7.75058	9.69391	0.467167	3.68123	7.85072	0.00625817	0.0725322
CG12729	0	0	0	0	0	0	0	0	0	0	0	-1.29111	0	1	1
CG1273	0.169038	0	0	0	0.307788	0	0	0	0	0	2.17786	-0.696323	2.45515	0.120937	0.44236
CG12730	41.7523	46.4298	39.9199	35.4915	30.7788	41.3948	48.0798	39.0739	40.8197	37.6571	-0.0842634	5.32781	0.525754	0.470339	0.883577
CG12736	36.005	30.4195	36.3668	33.2733	40.0125	38.531	55.6943	39.6166	37.7195	44.5547	-0.30065	5.04449	8.77078	0.00394344	0.0538026
CG12744	2.02845	1.00064	3.97109	1.66366	0.923365	2.60345	2.61067	1.08539	2.06682	2.42348	-0.150177	1.30819	0.148557	0.700858	1
CG12746	49.528	50.0321	49.7431	51.019	60.9421	53.8914	66.7896	50.7419	48.312	54.4351	-0.0742688	5.71474	0.767105	0.383521	0.784359
CG1275	171.742	173.711	161.142	166.644	165.898	166.1	197.106	178.546	157.854	161.255	-0.0367293	7.40053	0.168612	0.682356	1
CG12766	2.7046	0.400257	1.88104	1.94094	2.15452	1.82241	4.56867	3.52751	1.03341	1.86421	-0.498055	1.31608	1.68801	0.197289	0.596002
CG12768	19.1013	19.4125	16.3024	19.1321	20.314	20.0466	21.9731	23.8785	23.7685	27.4039	-0.317512	4.32939	6.64815	0.0116038	0.10935
CG12769	69.1364	77.4497	57.8942	74.8649	57.5564	57.2759	51.3432	62.1384	60.4545	62.0783	0.201549	5.99418	4.05103	0.0472305	0.259114
CG12772	29.7506	30.2194	29.2606	33.5505	34.7801	38.2707	26.9769	34.461	39.528	35.0472	-0.147651	4.97713	2.42422	0.123096	0.446764
CG12773	39.0477	36.0231	51.4151	37.987	40.0125	37.2293	28.4998	29.8482	42.6282	38.03	0.215208	5.3027	3.60507	0.0609115	0.300696
CG12780	0	0	0	0	0	0	0	0.271347	0	0	-1.52607	-0.973315	0.956152	0.333606	0.723858
CG12782	0	0	0	0	0	0	0	0	0	0	0	-1.30545	0	1	1
CG12783	0.169038	0.400257	0.209004	0.277277	0.307788	0.260345	0	0	0.516706	0.745686	-0.236352	-0.39427	0.101695	0.750568	1
CG12784	0	0	0	0	0	0	0	0	0	0	0	-1.30545	0	1	1
CG12788	0	0	0	0	0	0	0	0	0	0	0	-1.30545	0	1	1
CG12795	16.3967	18.2117	17.5564	21.3503	23.3919	19.5259	23.496	20.0797	22.735	24.6076	-0.203043	4.38094	2.25328	0.136945	0.475937
CG12796	0	0	0.209004	0	0	0	0	0	0	0	1.45953	-1.14165	1.46512	0.248344	0.613612
CG12811	13.354	13.0083	16.7204	14.1411	14.7738	10.6741	21.538	18.1802	16.7929	13.6088	-0.168408	4.03726	0.895008	0.346739	0.740066
CG12814	90.4351	83.8538	71.0615	74.033	70.1757	53.8914	63.3087	56.9828	63.5548	51.0795	0.435031	6.1415	17.1685	7.89529e-05	0.00395321
CG12817	17.0728	16.2104	16.3024	16.0821	19.3907	16.1414	19.7976	15.7381	12.9176	13.7952	0.113489	4.49268	0.841451	0.361513	0.756446
CG12818	5.91632	3.80244	5.22511	3.32733	4.30904	5.2069	8.70223	7.32636	5.42541	5.2198	-0.476438	2.49872	2.49887	0.11755	0.434705
CG12822	35.4979	40.0257	38.2478	33.5505	55.4019	57.0155	48.9501	47.2143	37.2028	44.7411	-0.219576	5.34887	6.52319	0.012385	0.114203
CG12824	0	0.200128	0	0	0.307788	0	0.435112	0.271347	0	0.186421	-0.86707	-0.590414	0.614627	0.435176	0.844455
CG12825	2.02845	2.60167	1.46303	1.94094	4.30904	1.30172	2.61067	1.35673	1.29176	1.86421	0.483562	1.77443	1.66603	0.200203	0.601113
CG12826	0.169038	0.200128	0.209004	0.554554	0	0	0.435112	0	0	0.186421	0.612141	-0.76485	0.336527	0.563409	0.967472
CG12828	0	0	0	0	0.307788	0	0	0.271347	0	0	-0.0344406	-1.19932	0.000998366	0.974927	1
CG12831	0	0	0.209004	0	0	0	0	0	0	0.186421	-0.0310064	-1.20611	0.000991033	0.975009	1
CG12836	0.338075	0.800514	0.627013	1.38639	0.923365	1.04138	1.30533	0.81404	0.775058	1.49137	-0.491012	0.544089	0.862392	0.355635	0.749271
CG12848	12.3397	14.4092	11.4952	12.2002	10.7726	20.8276	22.8434	18.7229	19.6348	17.5236	-0.694207	3.86631	22.9255	6.83398e-06	0.000825451
CG12849	0	0	0	0	0	0	0	0	0	0	0	-1.2908	0	1	1
CG12851	79.2786	84.4542	68.1355	82.6286	69.2524	68.9914	58.5225	62.1384	75.1807	71.7722	0.189874	6.19339	4.77033	0.0316392	0.205908
CG12853	0	0	0	0	0	0	0.435112	0	0	0	-2.22395	-1.02952	3.37463	0.089522	0.37624
CG12857	1.01423	0.600385	1.04502	0.831832	1.53894	0.52069	1.30533	1.62808	0.775058	1.67779	-0.27024	0.350386	0.364129	0.547789	0.953869
CG12858	381.18	388.649	351.337	389.575	325.024	337.407	250.189	338.369	342.576	362.03	0.171355	8.51991	4.35341	0.0398561	0.236745
CG12859	62.882	73.8474	62.0743	72.9239	75.7159	79.9259	117.045	78.1479	68.9802	90.4144	-0.327111	6.16417	7.46604	0.00761098	0.0829374
CG12860	0	0	0	0	0	0	0	0	0	0	0	-1.22343	0	1	1
CG12861	0	0	0	0	0	0	0	0	0	0	0	-1.29807	0	1	1
CG12862	0	0	0	0	0	0	0	0	0	0.186421	-1.49026	-1.27716	2.06964	0.229901	0.613612
CG12863	7.43766	7.20462	5.64312	8.59559	8.00249	6.50862	6.74423	7.05502	8.00894	7.8297	0.0187066	2.83231	0.00954259	0.985743	1
CG12866	0	0.200128	0	0	0	0	0	0	0	0	1.45514	-1.27693	1.73236	0.248344	0.613612
CG12868	13.8611	13.4086	10.6592	7.20921	9.23365	9.37242	16.0991	11.3966	10.5925	11.3717	-0.0971989	3.69989	0.323706	0.598817	0.990524
CG12869	1.52134	1.80116	1.67204	1.94094	1.23115	1.30172	1.30533	1.35673	1.80847	1.67779	0.131105	0.956804	0.139945	0.709244	1
CG1287	0.507113	0	0.627013	0	0.615577	0.52069	0	0.542694	1.03341	0	-0.138652	-0.51765	0.0254283	0.873673	1
CG12877	18.5941	23.8153	20.9004	24.1231	26.7776	27.5966	19.7976	21.9791	22.9934	25.3533	-0.0516691	4.49029	0.0980344	0.754949	1
CG1288	0	0	0	0	0	0	0	0	0	0	0	-1.29066	0	1	1
CG12880	4.22594	2.60167	3.13507	1.38639	4.61682	2.86379	1.958	1.62808	1.55012	2.05064	0.664507	1.36513	4.44817	0.0378067	0.229961
CG12883	5.57824	2.8018	4.38909	3.32733	3.07788	5.72759	6.09156	4.6129	4.13364	5.2198	-0.403337	2.44264	2.79386	0.0982119	0.398156
CG12885	1.85941	1.80116	1.04502	1.94094	1.84673	2.60345	2.17556	2.44212	2.58353	2.98274	-0.59441	1.28155	2.37116	0.127217	0.455471
CG12895	30.2577	30.2194	22.7815	24.955	21.2374	29.419	41.3356	28.4914	23.5101	29.4546	-0.228843	4.68665	3.77249	0.0553306	0.283813
CG12896	2.02845	1.4009	1.46303	1.66366	1.84673	2.3431	3.69845	1.89943	1.80847	1.49137	-0.41538	1.29917	0.940747	0.334769	0.725286
CG12898	0	0	0	0	0	0	0	0	0	0	0	-1.20839	0	1	1
CG12902	0	0	0	0	0	0	0	0	0	0	0	-1.30545	0	1	1
CG12907	0	0	0	0	0	0	0	0	0	0	0	-1.30545	0	1	1
CG12909	2.7046	1.60103	2.92606	1.38639	4.92461	4.42586	3.916	3.25616	2.84188	2.6099	-0.350988	1.97551	1.00514	0.318846	0.709128
CG1291	14.5372	18.2117	19.8554	20.2412	16.005	20.8276	22.1907	20.8937	24.0268	19.5742	-0.275908	4.19737	4.4234	0.0383314	0.231888
CG12910	14.8753	15.2098	13.1673	15.8048	16.6206	12.7569	12.4007	10.5825	12.1426	16.4051	0.221445	4.01145	2.8784	0.0971497	0.395287
CG12911	0.676151	0.800514	0.418009	1.94094	0.307788	0.260345	0.217556	0.542694	0.775058	0.745686	0.642571	-0.0961456	1.09362	0.298562	0.680665
CG12912	0	0	0	0	0	0	0	0	0	0	0	-1.30545	0	1	1
CG12913	28.0602	28.6184	29.8876	31.8869	35.7034	28.6379	30.2403	29.0341	31.519	33.5559	0.00378094	4.74976	0.00152685	0.96892	1
CG12914	0	0	0	0	0	0	0	0	0	0	0	-1.25519	0	1	1
CG12917	0.169038	0.200128	0.209004	0.554554	0.307788	0	0	0	0	0	3.55934	-0.990932	8.21856	0.00544993	0.0668336
CG12920	0.338075	0.200128	0	0	0	0	0	0	0	0.186421	1.10826	-1.18697	1.08633	0.332129	0.72182
CG12923	0.338075	0.400257	0.209004	0.277277	0.307788	0.52069	0.435112	0.271347	0	0.186421	0.124056	-0.325357	0.0291451	0.86484	1
CG12926	19.2703	24.4157	16.5114	21.0731	18.7751	28.8983	41.7707	31.7476	25.8353	34.1151	-0.700491	4.37645	30.5461	3.34176e-07	0.000112669
CG12929	3.04268	5.80372	4.5981	3.6046	2.77009	1.82241	6.30912	4.34155	4.65035	3.91485	-0.0796087	2.10552	0.113853	0.73661	1
CG12934	0.507113	0.600385	0	0.277277	0.307788	0.260345	0.435112	0.271347	0.258353	0.559264	-0.0729538	-0.656807	0.00698977	0.933562	1
CG12935	6.25439	6.80437	4.8071	6.93193	9.23365	3.90517	10.2251	7.05502	7.49223	5.96549	-0.0482386	2.84676	0.0581023	0.810087	1
CG12942	7.60669	6.60424	6.47914	9.7047	7.69471	10.4138	8.48468	6.51232	10.3341	8.76181	-0.233593	3.09117	1.2003	0.27628	0.652454
CG12945	47.6686	50.6325	43.4729	42.1461	40.0125	33.8448	44.5989	34.461	35.6527	36.9114	0.273236	5.34478	5.80584	0.0180766	0.144743
CG12947	4.56402	5.20334	3.76208	5.54554	7.38692	2.86379	3.26334	4.0702	6.20047	5.77906	0.222183	2.53112	0.989825	0.360778	0.755569
CG12948	10.1423	9.60616	11.2862	11.0911	10.4648	13.0172	13.706	8.95445	12.4009	10.2532	-0.151751	3.47158	1.00637	0.31855	0.708823
CG12950	156.36	145.693	126.03	146.402	138.197	117.936	104.862	125.634	121.684	129.563	0.249433	7.06924	6.84691	0.0104657	0.101779
CG12951	0	0	0	0	0	0	0	0	0	0	0	-1.25749	0	1	1
CG12963	0	0	0	0	0	0	0	0	0	0	0	-0.718971	0	1	1
CG12964	1.18326	1.00064	1.46303	0.277277	1.23115	0.52069	0.870223	0.542694	1.29176	0.932107	0.313925	0.309609	0.593876	0.452429	0.863409
CG12970	0.338075	0	0.209004	0	0.307788	0	0.870223	0	0.516706	0	-0.609047	-0.717586	0.449522	0.504419	0.91859
CG12971	0.169038	0.200128	0.209004	0	0.307788	0	0	0	0	0.186421	1.51008	-0.916839	1.83363	0.18365	0.571493
CG12974	0.676151	0.600385	0	0.554554	1.23115	1.30172	1.08778	0.81404	0.258353	0.186421	-0.272551	0.0195064	0.154849	0.694905	1
CG12975	11.1565	15.61	12.7493	14.6957	15.6972	10.6741	20.8854	17.3662	10.8508	17.8965	-0.169031	3.89906	1.28764	0.259594	0.628763
CG12983	0	0	0	0	0	0	0	0	0.258353	0	-1.52247	-1.24143	1.81996	0.229901	0.613612
CG12984	0	0	0	0	0	0	0	0	0	0	0	-1.23474	0	1	1
CG12985	1.3523	0.600385	1.88104	1.94094	1.84673	2.08276	1.52289	0.542694	0.258353	0.559264	0.584111	0.746813	1.82593	0.180106	0.565433
CG12986	0	0	0	0	0	0	0	0	0	0	0	-1.20795	0	1	1
CG1299	53.754	59.0379	48.698	54.9009	65.2511	51.2879	49.3852	49.1138	47.0202	42.6905	0.232559	5.81636	3.54836	0.0629379	0.307286
CG12990	0	0.200128	0	0	0	0	0	0.271347	0	0.372843	-1.23349	-1.05847	1.24876	0.28181	0.658542
CG12991	88.9138	92.2592	81.3027	87.8969	72.3302	72.8966	72.011	71.6356	69.2385	76.2464	0.224733	6.48997	7.5206	0.00740189	0.0812719
CG12992	1.18326	1.4009	0.418009	1.38639	1.23115	0.52069	0.435112	0.271347	0.258353	0.559264	1.36454	0.329138	5.60721	0.0200983	0.155566
CG12994	16.9038	18.0116	15.8843	17.1912	18.4673	19.0052	17.8396	19.537	18.0847	19.2014	-0.117414	4.10101	0.776479	0.380643	0.780917
CG12995	0	0	0.209004	0.277277	0.923365	1.04138	0.870223	0.271347	0	0.372843	-1.05105	-0.234583	1.58878	0.211399	0.613612
CG12998	0.845188	0.400257	0	0.554554	0.615577	0.781035	0.652667	0.81404	0.258353	0.372843	-0.219439	-0.139538	0.0873458	0.768282	1
CG13000	0	0	0	0.277277	0	0	0	0	0	0	1.48439	-1.23423	1.48818	0.248344	0.613612
CG13001	11.8326	11.6074	10.4502	11.9229	12.6193	13.5379	13.706	16.2808	11.3675	18.4557	-0.336189	3.71005	5.67244	0.0194093	0.151923
CG13002	0	0	0	0	0	1.04138	0	0	0	0	-3.10784	-0.942274	3.76622	0.0560472	0.285229
CG13003	31.9481	27.2175	26.3346	29.3914	26.4698	18.7448	19.7976	23.6072	19.3765	22.557	0.442485	4.57795	9.67392	0.00252577	0.0405846
CG13004	12.3397	9.60616	16.5114	10.2593	11.696	9.37242	12.4007	10.5825	8.26729	9.50749	0.270987	3.66857	2.88338	0.0930648	0.384369
CG13005	5.57824	7.00449	7.94217	3.88188	3.69346	7.28966	6.30912	5.69828	5.94211	7.45686	-0.196173	2.58915	0.896817	0.346254	0.739599
CG13008	1.3523	1.20077	1.67204	1.94094	1.84673	1.04138	1.52289	1.35673	1.55012	1.67779	0.128547	1.00196	0.107	0.786011	1
CG13010	0.507113	0.400257	0	0	0.307788	0	0	0.271347	0.258353	0	1.23945	-0.413692	1.51312	0.221973	0.613612
CG13012	11.1565	8.60552	8.36018	7.76376	8.61807	11.7155	14.5762	8.6831	11.8842	11.5581	-0.385739	3.48127	4.95529	0.02859	0.192492
CG13014	5.07113	4.80308	5.85213	3.88188	6.15577	7.55	6.96179	4.88424	5.42541	7.45686	-0.333583	2.7176	2.39579	0.125285	0.451065
CG13016	11.1565	10.8069	13.7943	10.8138	10.157	8.07069	12.8358	8.41175	7.75058	9.13465	0.292678	3.28829	2.55917	0.113274	0.423878
CG13018	2.87364	3.20205	5.01611	3.6046	3.69346	4.68621	6.30912	4.88424	2.32517	4.84696	-0.338894	2.20517	1.67528	0.198971	0.599027
CG13021	0.169038	0	0	0	0	0	0	0.271347	0.258353	0	-0.820267	-1.19947	0.396779	0.532077	0.942591
CG13022	4.0569	3.20205	3.97109	1.94094	3.69346	3.90517	2.17556	2.44212	3.61694	4.47411	0.0289202	2.19113	0.0110207	0.916633	1
CG13023	1.69038	0.800514	0.418009	1.10911	1.23115	1.04138	1.30533	1.62808	2.32517	1.86421	-0.621787	0.262667	1.74852	0.189521	0.582636
CG13024	12.0017	8.00514	8.98719	8.59559	7.38692	8.07069	6.96179	7.59771	6.97552	6.33833	0.34158	2.98261	3.63364	0.0599176	0.29802
CG13025	14.0301	10.6068	8.77819	11.9229	13.2349	11.9759	11.748	11.6679	14.2094	12.6767	-0.0902639	3.4409	0.231711	0.631464	1
CG13026	7.26862	8.60552	5.85213	7.48649	8.31028	5.72759	9.57246	7.59771	5.68376	6.15191	0.103908	2.83306	0.120433	0.729402	1
CG13028	0	0	0	0.277277	0	0.260345	0	0.271347	0	0	-0.773867	-1.21293	0.437717	0.528923	0.939303
CG13029	0	0	0	0	0	0	0	0.271347	0	0	-1.52647	-1.16892	1.75568	0.229901	0.613612
CG13031	0	0	0	0	0	0	0	0	0	0	0	-1.15352	0	1	1
CG13032	0.845188	0.400257	0	0	0	0.781035	0.217556	0	0.516706	0.186421	-0.176329	-0.666681	0.0387636	0.844422	1
CG13033	0	0	0	0.277277	0	0	0.217556	0	0	0	-0.0227121	-1.1124	0.000573411	0.980976	1
CG13038	0	0	0	0.277277	0.307788	0	0	0	0	0	2.21972	-0.731458	2.74675	0.102566	0.399724
CG13039	0	0	0	0	0	0	0	0	0	0	0	-1.30545	0	1	1
CG1304	0	0	0	0	0	0	0	0	0	0	0	-1.13041	0	1	1
CG13040	0	0	0	0	0	0	0	0	0.258353	0	-1.52248	-1.24777	1.68227	0.229901	0.613612
CG13041	0	0.200128	0	0.277277	0	0	0	0.81404	0	0	-0.563109	-0.824135	0.23345	0.630311	1
CG13042	0.169038	0	0	0	0	0	0.217556	0	0	0.186421	-0.771617	-0.57349	0.380986	0.538685	0.947466
CG13043	0.338075	0.600385	0.836018	0.277277	1.23115	0.52069	0.435112	0.271347	0.258353	0	1.08689	0.651828	1.77278	0.18651	0.576238
CG13044	0.507113	0.200128	0.209004	0.277277	0.307788	0	0.435112	0.81404	0	0	0.340482	0.296861	0.0938963	0.760047	1
CG13045	0	0	0	0	0	0	0	0	0	0	0	-1.22163	0	1	1
CG13046	3.04268	1.80116	2.29905	2.21822	2.77009	1.82241	3.04578	3.52751	5.68376	3.72843	-0.547303	1.21909	2.74297	0.101279	0.399724
CG13047	0	0.200128	0	0	0	0.260345	0.217556	0	0	0.372843	-1.58682	-0.913246	2.04697	0.156084	0.516586
CG13048	0	0	0	0	0	0	0.217556	0	0	0	-1.5065	-1.27753	1.81117	0.229901	0.613612
CG13049	0.169038	0.200128	0	0	0	0	0	0.271347	0	0.186421	-0.0830198	-0.996379	0.00488655	0.956588	1
CG13050	0	0	0	0	0	0	0	0	0	0	0	-1.29936	0	1	1
CG13051	0.676151	0.600385	1.04502	0.554554	1.23115	0.260345	1.08778	0.81404	0.516706	0.932107	0.132363	-0.249509	0.0459714	0.853656	1
CG13053	0	0	0	0	0.307788	0.260345	0.435112	0	0	0.186421	-1.56385	-0.918142	1.65537	0.201799	0.604169
CG13054	1.3523	3.20205	2.29905	2.4955	1.84673	3.12414	2.17556	2.98482	3.35859	3.16916	-0.400877	1.39639	1.7793	0.18571	0.574469
CG13055	5.4092	4.00257	6.68814	4.43644	6.77134	6.50862	5.4389	5.69828	3.61694	4.47411	0.0836644	2.57197	0.145859	0.703454	1
CG13056	0.676151	0.800514	0.418009	1.10911	0.923365	0.781035	1.30533	0.542694	0.516706	0.372843	0.120049	0.0565903	0.0427545	0.841659	1
CG13058	0	0	0	0	0.307788	0.260345	0.217556	0	0	0	-0.747666	-1.05371	0.421239	0.528923	0.939303
CG13059	0.338075	0	0	0	0	0	0.217556	0.271347	0	0	-0.113218	-0.93312	0.00842714	0.956588	1
CG13060	0	0	0	0	0	0	0.217556	0	0	0	-1.50659	-1.18113	1.90281	0.229901	0.613612
CG13062	0.507113	0.200128	0.418009	0.831832	0.307788	0	0.217556	0.271347	0.516706	0.372843	0.630903	-0.196052	0.639826	0.425948	0.83249
CG13063	0	0	0	0	0	0	0	0	0	0	0	-1.21183	0	1	1
CG13064	0	0	0.209004	0	0	0	0	0	0	0	1.45949	-1.25512	1.35091	0.255225	0.622507
CG13065	0.169038	0.200128	0	0	0	0.260345	0	0	0	0	0.621943	-1.00364	0.282366	0.596722	0.989819
CG13066	0	0	0	0	0	0	0.435112	0	0	0.186421	-2.68446	-1.21547	5.01659	0.0375692	0.229099
CG13067	22.651	22.0141	18.3924	16.9139	25.8542	26.0345	25.454	18.9943	17.3096	20.6928	-0.0382469	3.99454	0.0450016	0.832496	1
CG13068	0.507113	0.600385	0.836018	1.66366	0.615577	0.781035	1.30533	0.542694	1.03341	0.372843	0.0340581	-0.346767	0.00349326	0.993585	1
CG13069	0	0.400257	0	0.277277	0	0	0.652667	0.542694	0.258353	0.372843	-1.31875	-0.235619	2.22252	0.139621	0.481434
CG1307	25.3556	25.8166	25.0805	21.9049	27.0854	37.2293	43.5112	28.2201	34.6193	35.0472	-0.513558	4.88922	16.4888	0.000106567	0.00491058
CG13070	0	0	0	0	0	0	0	0	0	0	0	-1.26296	0	1	1
CG13071	15.2134	18.8121	11.4952	13.3093	11.696	13.7983	18.9274	13.8387	17.0513	18.0829	-0.207977	3.35607	1.19871	0.276595	0.652738
CG13073	0.169038	0.200128	0.418009	0.831832	0	0.260345	0	0	0	0	2.23067	-0.613091	4.14021	0.0449143	0.253943
CG13074	0.507113	0.200128	0.418009	0.277277	0	0.260345	0	0.542694	0.258353	0.372843	0.0888207	-0.562265	0.0124597	0.911379	1
CG13075	0	0.200128	0.418009	0	0	0	0.652667	0.271347	0	0.186421	-0.704202	-0.741611	0.581065	0.447953	0.859091
CG13077	47.1615	46.4298	41.8009	49.6326	38.4735	42.1759	48.5149	35.5464	42.8866	43.809	0.0694879	5.35061	0.317327	0.574665	0.978486
CG13078	0	0	0	0	0	0	0	0	0	0.372843	-2.19423	-1.19265	2.55267	0.118144	0.436054
CG13081	0.169038	0	0	0	0	0	0	0	0	0.186421	-0.0532354	-0.998734	0.00236052	0.969295	1
CG13082	3.54979	5.20334	3.55308	3.6046	4.92461	6.50862	3.48089	3.52751	3.87529	2.98274	0.0395469	2.22543	0.0170552	0.896396	1
CG13083	0.169038	0	0	0	0	0	0	1.35673	0	0	-1.94588	0.61937	1.97407	0.165622	0.535863
CG13084	0	0	0.209004	0	0.307788	0.52069	0	0.81404	0	0	-1.20437	0.420458	1.09624	0.298447	0.680588
CG13085	0.338075	0.400257	1.67204	1.38639	0.923365	0.781035	1.08778	1.08539	0.258353	0.932107	0.124518	0.464311	0.0732694	0.875408	1
CG13086	1.18326	1.00064	7.52416	1.94094	2.46231	1.56207	4.35112	2.71347	2.32517	0.372843	0.333142	2.25365	0.501558	0.480706	0.894313
CG13088	4.90209	5.40347	3.55308	4.71371	4.30904	3.64483	4.35112	1.89943	6.71717	3.16916	0.215469	2.17693	0.878916	0.351089	0.74479
CG1309	87.3925	84.0539	86.1099	86.7878	75.1003	74.9793	104.209	89.5445	76.7308	85.9403	-0.0403206	6.36573	0.204334	0.652368	1
CG13090	5.57824	8.80565	7.52416	6.1001	5.84798	8.85173	11.0953	7.59771	8.78399	8.38896	-0.396168	3.19044	5.22658	0.0246686	0.17529
CG13091	0	0	0	0	0	0	0	0	0	0.186421	-1.49074	-1.13883	1.51173	0.229901	0.613612
CG13096	7.94477	7.20462	11.0772	8.59559	5.2324	11.9759	11.3129	10.3112	10.0758	10.626	-0.425402	3.52015	2.71322	0.10312	0.400766
CG13097	9.29707	10.0064	7.31516	10.2593	14.7738	11.7155	9.57246	14.11	13.176	15.2866	-0.326473	3.64396	1.81156	0.181811	0.569185
CG13101	12.0017	12.6081	10.0322	9.98198	6.46355	4.68621	8.04956	4.6129	7.23388	5.03338	0.799052	3.27198	10.9727	0.00134726	0.0264468
CG13102	0	0	0	0	0	0	0	0	0	0	0	-0.893564	0	1	1
CG13108	12.0017	9.60616	11.9133	16.9139	19.0829	19.7862	18.7098	16.5522	16.2762	20.1335	-0.420884	3.94586	4.52849	0.0361579	0.224754
CG1311	47.6686	44.0283	44.0999	33.5505	38.7813	33.3241	36.7669	32.0189	41.8531	33.3694	0.236944	5.59418	3.9736	0.0493454	0.2651
CG13110	0	0	0	0	0	0	0	0	0	0	0	-1.30545	0	1	1
CG13113	0	0	0	0	0	0	0	0	0	0	0	-1.06921	0	1	1
CG13114	0	0.200128	0	0.277277	0	0	0	0.81404	0	0	-0.560078	-0.444282	0.189686	0.664426	1
CG13116	22.313	27.0173	20.0644	21.6276	20.9296	20.3069	23.9311	21.4364	25.0602	16.9643	0.0620904	4.35128	0.205213	0.651671	1
CG13117	70.3197	79.6511	59.3573	58.5055	50.4773	68.4707	77.0148	64.5805	62.7797	63.7561	-0.0759887	5.74924	0.550339	0.460173	0.872316
CG13123	3.38075	3.00193	4.18009	3.6046	3.69346	3.64483	6.52667	3.52751	3.61694	2.79632	-0.176195	2.02766	0.468903	0.495309	0.909457
CG13124	440.681	442.284	389.375	400.943	485.074	415.771	419.23	387.755	406.906	426.346	0.0697987	8.60158	0.793426	0.375518	0.77499
CG13126	13.1849	12.2078	14.4213	10.2593	16.6206	14.0586	11.3129	11.3966	13.951	13.4223	0.0529354	3.68289	0.202441	0.694177	1
CG13127	0	0	0	0	0	0	0	0	0	0	0	-1.30545	0	1	1
CG13131	0	0	0	0	0	0	0	0	0	0	0	-1.28377	0	1	1
CG13133	0.169038	8.40539	0.209004	3.88188	1.23115	2.08276	3.69845	3.25616	0.775058	3.35559	0.0477215	2.83977	0.00331278	0.954233	1
CG13135	0	0	0	0	0	0	0	0	0.258353	0	-1.52246	-1.23722	1.67617	0.229901	0.613612
CG13137	0	0	0	0.277277	0	0	0	0	0	0	1.48429	-1.20792	1.75011	0.248344	0.613612
CG13138	0	0	0	0	0	0	0	0	0	0	0	-1.14913	0	1	1
CG1314	0.169038	0.200128	0	0.277277	0.307788	0	0.435112	0	0.516706	0	-0.0574844	-1.02484	0.00392902	0.950186	1
CG13142	9.80418	8.20527	7.73317	8.31832	9.84922	8.59138	8.91979	7.05502	6.20047	6.52475	0.234243	3.14287	1.60695	0.208296	0.613612
CG13144	2.36653	1.00064	1.25403	0.831832	1.23115	2.60345	3.26334	0.81404	2.32517	1.49137	-0.602706	1.02906	1.82386	0.180351	0.565883
CG13148	5.57824	9.00578	7.73317	9.98198	11.696	9.89311	11.3129	11.1252	6.71717	7.8297	-0.112347	2.91461	0.326632	0.56912	0.97199
CG1315	5.4092	2.8018	10.0322	3.32733	3.07788	6.50862	9.3549	4.88424	5.42541	2.23706	-0.16316	2.82227	0.173131	0.678367	1
CG13151	4.39498	5.40347	5.22511	4.71371	6.15577	5.72759	8.48468	6.78367	7.75058	6.71117	-0.46362	2.74104	4.29591	0.0411571	0.241949
CG13154	0	0	0	0	0.615577	0	0.217556	0.271347	0.258353	0	-0.500284	-1.02273	0.20662	0.650614	1
CG13155	0	0	0	0	0	0	0.217556	0	0	0.186421	-2.20884	-1.21435	3.57049	0.089522	0.37624
CG13157	0	0	0	0	0	0	0	0	0	0	0	-1.30545	0	1	1
CG13159	0	0	0	0	0	0	0	0	0	0	0	-1.11158	0	1	1
CG1316	158.895	174.712	174.519	171.912	193.907	187.448	187.316	206.766	196.09	200.962	-0.163979	7.44342	4.87321	0.0299028	0.198096
CG13160	0	0	0	0	0	0	0	0	0	0	0	-1.17032	0	1	1
CG13163	7.94477	9.80629	7.73317	6.1001	7.38692	8.33104	11.9656	10.0398	8.52564	7.08401	-0.223818	3.11214	1.84816	0.177503	0.560313
CG13168	2.7046	1.80116	2.09004	2.77277	2.15452	1.56207	1.30533	2.44212	1.80847	3.16916	0.146151	1.40823	0.188764	0.665021	1
CG1317	253.725	238.753	215.066	212.672	203.448	214.524	159.904	199.983	198.415	200.217	0.208923	7.71275	8.29698	0.00499693	0.062987
CG13170	0	0.200128	0	0.277277	0	0	0	0	0	0.186421	0.696917	-1.12944	0.337184	0.591775	0.986409
CG13171	0	0	0	0	0	0	0	0	0	0	0	-1.28406	0	1	1
CG13175	0	0	0	0	0	0	0	0	0	0	0	-1.30545	0	1	1
CG13177	0.169038	0.200128	1.25403	1.94094	4.00125	1.82241	1.74045	0.81404	0.516706	1.67779	0.030835	0.972399	0.000883254	0.976359	1
CG13178	0.507113	0.600385	0.209004	0.831832	0.923365	1.30172	0.435112	0.81404	0.516706	0.745686	-0.347188	0.821126	0.334924	0.564266	0.968348
CG13183	1.18326	1.00064	0.627013	1.10911	0.923365	0	0.435112	0.542694	0	0.745686	1.34515	0.758494	7.09345	0.0138749	0.123122
CG13185	35.6669	30.8198	38.8748	34.1051	43.7059	42.4362	18.2747	29.3055	39.0113	24.4212	0.259929	5.11366	2.23479	0.138546	0.47931
CG13186	0	0	0	0	0	0	0	0	0	0	0	-1.27663	0	1	1
CG13188	5.07113	6.00385	5.01611	4.99099	5.2324	6.24828	4.13356	6.24098	6.71717	6.15191	-0.156287	3.11898	0.572985	0.451116	0.861898
CG1319	24.5105	28.4182	23.4085	22.4595	23.6997	23.1707	30.0227	20.8937	22.9934	19.7607	0.0705904	4.64228	0.384805	0.536661	0.945815
CG13192	13.523	17.211	10.6592	13.3093	12.9271	11.4552	20.8854	13.0246	12.4009	13.9816	-0.0888153	3.86303	0.363415	0.548181	0.953903
CG13193	0	0.200128	0	0	0	0	0	0	0.258353	0	-0.067096	-1.17318	0.00267239	0.969295	1
CG13196	0	0.200128	0	0	0	0	0	0	0	0	1.45519	-1.22705	1.69056	0.248344	0.613612
CG13197	36.005	34.0218	35.5308	32.4414	34.4723	27.5966	37.6372	32.2903	31.0023	37.6571	0.0510522	5.01902	0.290833	0.591062	0.986409
CG13198	0	0	0.209004	0	0.307788	0	0.217556	0	0.258353	0	-0.0393924	-1.11478	0.00153219	0.968908	1
[truncated: 14,728 more rows]
