# Supplementary material for: Experimentally induced active and quiet sleep engage non-overlapping transcriptional programs in Drosophila
Source: bioRxiv preprint, doi:10.1101/2023.04.03.535331, version 3 (2023-10-15)
Supplement: Figure7-source data 2 [file 535331_file20.xlsx]

## Sheet: Signif optogenetic 1hr
R23E10Gal4 > UASChrimson +ATR vs -ATR (1hours)
Downregulated			Upregulated
Gene Name	Log2Fold Change	qFDR	Gene Name	Log2Fold Change	qFDR
scpr-C	-2.31065	0.0365718	CG11652	0.589368	0.000745264
CG34138	-1.7756	3.14e-09	CG15784	0.597006	0.0471244
CG9505	-0.981375	1.89e-05	trpl	0.629027	1.2e-06
CG17386	-0.966353	1.17e-06	CG18522	0.631943	0.0491396
Myo28B1	-0.72732	0.000148147	CG30203	0.643119	0.00634002
JhI-21	-0.706677	3.84e-07	Vinc	0.658948	1.25e-08
CG9305	-0.676082	0.00218778	Faa	0.732315	0.0421911
CG30456	-0.59722	0.0170366	Hsp83	0.786327	2.36e-06
Aats-lys	-0.589089	0.00341606	CG3505	0.950142	0.048153
CG8008	-0.582903	0.0168354	CG15414	0.955858	0.0459184
			CG18031	1.69899	4.53e-06
			CG17005	1.87364	8.72e-09
			CR45457	2.10463	0.000148147
			CR45456	2.13591	4.68e-06
			Cyp309a1	3.41779	0.0170366
			CG32368	3.65655	0.000316005
			CG42825	5.972	0.0173498

## Sheet: All genes
Row.names	dm13_1	dm13_2	dm13_3	dm13_4	dm13_5	dm14_1	dm14_2	dm14_3	dm14_4	dm14_5	logFC	logCPM	F	PValue	FDR
128up	19.4696	20.9157	17.8189	23.5112	22.0187	16.7095	21.1992	18.506	25.2889	21.8185	-0.00595512	4.49957	0.00241294	0.960935	1
140up	11.7317	14.7293	17.2328	17.0456	15.654	15.9613	14.9093	13.8179	12.4337	18.2666	0.0262701	3.85757	0.0438146	0.834687	1
14-3-3epsilon	508.206	528.194	467.747	550.456	570.595	420.232	503.423	573.194	523.48	542.418	0.034519	9.19045	0.171585	0.679724	1
14-3-3zeta	1422.28	1428.3	1541.57	1436.83	1462.18	1375.17	1477.42	1471.6	1449.69	1618.88	-0.0199074	10.6062	0.0718704	0.789266	1
18w	40.1872	50.0798	40.9132	38.4996	41.9732	35.913	40.3018	36.0251	46.363	42.8759	0.0735486	5.44024	0.316461	0.575186	1
26-29-p	97.3479	97.9502	81.4747	96.102	90.8273	71.5766	74.0808	79.9461	84.7178	81.9462	0.239368	6.83069	2.71386	0.10308	0.906788
2mit	153.011	138.456	163.653	134.602	131.768	144.65	154.684	141.88	148.151	158.818	-0.0515924	7.24247	0.339687	0.561515	1
312	15.2262	13.2564	15.5916	14.1067	13.7617	17.7071	11.415	14.3113	11.5907	16.237	0.0183229	3.92417	0.0218093	0.882937	1
4EHP	160.749	138.75	173.383	151.647	152.239	151.882	157.247	150.022	164.378	180.383	-0.049233	7.43629	0.240499	0.625078	1
4E-T	120.062	110.176	164.356	100.804	100.116	148.391	140.474	119.426	132.134	145.372	-0.199912	6.98591	3.5755	0.0619592	0.804465
5.8SrRNA:CR40454	12.4805	12.9618	13.9503	35.8546	4.98862	15.4625	7.92059	2.96097	5.69	3.29814	1.11725	5.96192	0.52457	0.470838	1
5-HT1A	68.8924	64.0727	63.0696	61.7169	59.8635	59.855	62.8988	58.9726	65.3296	71.0369	-0.0027468	6.06899	0.000908144	0.976028	1
5-HT1B	28.4556	33.2883	37.0446	28.8012	31.3079	37.16	34.2449	30.1032	39.1978	41.3536	-0.188451	5.22628	3.11986	0.080844	0.836977
5-HT2A	117.816	108.703	151.109	121.083	117.835	113.974	134.883	109.556	109.796	138.015	0.0260174	6.94023	0.0778873	0.780842	1
5-HT2B	30.4524	27.102	36.6929	28.2134	28.2115	34.9154	31.4494	26.402	27.8178	34.25	-0.0337119	4.83607	0.0766712	0.976926	1
5-HT7	31.4509	28.7222	38.0997	25.5684	25.9752	34.1672	37.2734	30.5967	30.9789	37.0407	-0.174613	4.86802	2.90135	0.0920684	0.873032
5PtaseI	88.8612	78.9493	90.5014	89.6364	79.1299	90.7801	88.2913	87.5953	84.2963	102.496	-0.0869459	6.45989	1.67326	0.199239	0.912802
5SrRNA:CR33353	0	0	0	0	0	0	0	0	0	0	0	-1.30545	0	1	1
5SrRNA:CR33354	0	0	0	0	0	0	0	0	0	0	0	-1.30545	0	1	1
5SrRNA:CR33355	0	0	0	0	0	0	0	0	0	0	0	-1.30545	0	1	1
5SrRNA:CR33357	0	0	0	0	0	0	0	0	0	0	0	-1.30545	0	1	1
5SrRNA:CR33358	0	0	0	0	0	0	0	0	0	0	0	-1.30545	0	1	1
5SrRNA:CR33359	0	0	0	0	0	0	0	0	0	0	0	-1.30545	0	1	1
5SrRNA:CR33360	0	0	0	0	0	0	0	0	0	0	0	-1.30545	0	1	1
5SrRNA:CR33361	0	0	0	0	0	0	0	0	0	0	0	-1.30545	0	1	1
5SrRNA:CR33362	0	0	0	0	0	0	0	0	0	0	0	-1.30545	0	1	1
5SrRNA:CR33364	0	0	0	0	0	0	0	0	0	0	0	-1.30545	0	1	1
5SrRNA:CR33365	0	0	0	0	0	0	0	0	0	0	0	-1.30545	0	1	1
5SrRNA:CR33366	0	0	0	0	0	0	0	0	0	0	0	-1.30545	0	1	1
5SrRNA:CR33367	0	0	0	0	0.172021	0	0	0	0	0	1.26125	-1.06526	0.947029	0.334724	0.978833
5SrRNA:CR33368	0	0	0	0	0	0	0	0	0	0	0	-1.30545	0	1	1
5SrRNA:CR33369	0	0	0	0	0	0	0	0	0	0	0	-1.30545	0	1	1
5SrRNA:CR33370	0	0	0	0	0	0	0	0	0	0	0	-1.30545	0	1	1
5SrRNA:CR33372	0	0	0	0	0	0	0	0	0	0	0	-1.30545	0	1	1
5SrRNA:CR33373	0	0	0	0	0	0	0	0	0	0	0	-1.30545	0	1	1
5SrRNA:CR33374	0	0	0	0	0	0	0	0	0	0	0	-1.30545	0	1	1
5SrRNA:CR33375	0	0	0	0	0	0	0	0	0	0	0	-1.30545	0	1	1
5SrRNA:CR33376	0	0	0	0	0	0	0	0	0	0	0	-1.30545	0	1	1
5SrRNA:CR33377	0	0	0	0	0	0	0	0	0	0	0	-1.30545	0	1	1
5SrRNA:CR33378	0	0	0	0	0	0	0	0	0	0	0	-1.30545	0	1	1
5SrRNA:CR33379	0	0	0	0	0	0	0	0	0	0	0	-1.30545	0	1	1
5SrRNA:CR33380	0	0	0	0	0	0	0	0	0	0	0	-1.30545	0	1	1
5SrRNA:CR33381	0	0	0	0	0	0	0	0	0	0	0	-1.30545	0	1	1
5SrRNA:CR33382	0	0	0	0	0	0	0	0	0	0	0	-1.30545	0	1	1
5SrRNA:CR33383	0	0	0	0	0	0	0	0	0	0	0	-1.30545	0	1	1
5SrRNA:CR33384	0	0	0	0	0	0	0	0	0	0	0	-1.30545	0	1	1
5SrRNA:CR33385	0	0	0	0	0	0	0	0	0	0	0	-1.30545	0	1	1
5SrRNA:CR33386	0	0	0	0	0	0	0	0	0	0	0	-1.30545	0	1	1
5SrRNA:CR33387	0	0	0	0	0	0	0	0	0	0	0	-1.30545	0	1	1
5SrRNA:CR33388	0	0	0	0	0	0	0	0	0	0	0	-1.30545	0	1	1
5SrRNA:CR33389	0	0	0	0	0	0	0	0	0	0	0	-1.30545	0	1	1
5SrRNA:CR33390	0	0	0	0	0	0	0	0	0	0	0	-1.30545	0	1	1
5SrRNA:CR33391	0	0	0	0	0	0	0	0	0	0	0	-1.30545	0	1	1
5SrRNA:CR33392	0	0	0	0	0	0	0	0	0	0	0	-1.30545	0	1	1
5SrRNA:CR33393	0	0	0	0	0	0	0	0	0	0	0	-1.30545	0	1	1
5SrRNA:CR33394	0	0	0	0	0	0	0	0	0	0	0	-1.30545	0	1	1
5SrRNA:CR33395	0	0	0	0	0	0	0	0	0	0	0	-1.30545	0	1	1
5SrRNA:CR33396	0	0	0	0	0	0	0	0	0	0	0	-1.30545	0	1	1
5SrRNA:CR33397	0	0	0	0	0	0	0	0	0	0	0	-1.30545	0	1	1
5SrRNA:CR33398	0	0	0	0	0	0	0	0	0	0	0	-1.30545	0	1	1
5SrRNA:CR33399	0	0	0	0	0	0	0	0	0	0	0	-1.30545	0	1	1
5SrRNA:CR33400	0	0	0	0	0	0	0	0	0	0	0	-1.30545	0	1	1
5SrRNA:CR33401	0	0	0	0	0	0	0	0	0	0	0	-1.30545	0	1	1
5SrRNA:CR33402	0	0	0	0	0	0	0	0	0	0	0	-1.30545	0	1	1
5SrRNA:CR33403	0	0	0	0	0	0	0	0	0	0	0	-1.30545	0	1	1
5SrRNA:CR33404	0	0	0	0	0	0	0	0	0	0	0	-1.30545	0	1	1
5SrRNA:CR33405	0	0	0	0	0	0	0	0	0	0	0	-1.30545	0	1	1
5SrRNA:CR33406	0	0	0	0	0	0	0	0	0	0	0	-1.30545	0	1	1
5SrRNA:CR33407	0	0	0	0	0	0	0	0	0	0	0	-1.30545	0	1	1
5SrRNA:CR33408	0	0	0	0	0	0	0	0	0	0	0	-1.30545	0	1	1
5SrRNA:CR33409	0	0	0	0	0	0	0	0	0	0	0	-1.30545	0	1	1
5SrRNA:CR33410	0	0	0	0	0	0	0	0	0	0	0	-1.30545	0	1	1
5SrRNA:CR33411	0	0	0	0	0	0	0	0	0	0	0	-1.30545	0	1	1
5SrRNA:CR33412	0	0	0	0	0	0	0	0	0	0	0	-1.30545	0	1	1
5SrRNA:CR33413	0	0	0	0	0	0	0	0	0	0	0	-1.30545	0	1	1
5SrRNA:CR33414	0	0	0	0	0	0	0	0	0	0	0	-1.30545	0	1	1
5SrRNA:CR33415	0	0	0	0	0	0	0	0	0	0	0	-1.30545	0	1	1
5SrRNA:CR33417	0	0	0	0	0	0	0	0	0	0	0	-1.30545	0	1	1
5SrRNA:CR33418	0	0	0	0	0	0	0	0	0	0	0	-1.30545	0	1	1
5SrRNA:CR33419	0	0	0	0	0	0	0	0	0	0	0	-1.30545	0	1	1
5SrRNA:CR33420	0	0	0	0	0	0	0	0	0	0	0	-1.30545	0	1	1
5SrRNA:CR33421	0	0	0	0	0	0	0	0	0	0	0	-1.30545	0	1	1
5SrRNA:CR33422	0	0	0	0	0	0	0	0	0	0	0	-1.30545	0	1	1
5SrRNA:CR33423	0	0	0	0	0	0	0	0	0	0	0	-1.30545	0	1	1
5SrRNA:CR33424	0	0	0	0	0	0	0	0	0	0	0	-1.30545	0	1	1
5SrRNA:CR33425	0	0	0	0	0	0	0	0	0	0	0	-1.30545	0	1	1
5SrRNA:CR33426	0	0	0	0	0	0	0	0	0	0	0	-1.30545	0	1	1
5SrRNA:CR33427	0	0	0	0	0	0	0	0	0	0	0	-1.30545	0	1	1
5SrRNA:CR33428	0	0	0	0	0	0	0	0	0	0	0	-1.21544	0	1	1
5SrRNA:CR33429	0	0	0	0	0	0	0	0	0	0	0	-1.30545	0	1	1
5SrRNA:CR33430	0	0	0	0	0	0	0	0	0	0	0	-1.30545	0	1	1
5SrRNA:CR33431	0	0	0	0	0	0	0	0	0	0	0	-1.30545	0	1	1
5SrRNA:CR33432	0	0	0	0	0	0	0	0	0	0	0	-1.30545	0	1	1
5SrRNA:CR33433	0	0	0	0	0	0	0	0	0	0	0	-1.30545	0	1	1
5SrRNA:CR33434	0	0	0	0	0	0	0	0	0	0	0	-1.30545	0	1	1
5SrRNA:CR33435	0	0	0	0	0	0	0	0	0	0	0	-1.30545	0	1	1
5SrRNA:CR33436	0	0	0	0	0	0	0	0	0	0	0	-1.30545	0	1	1
5SrRNA:CR33437	0	0	0	0	0	0	0	0	0	0	0	-1.30545	0	1	1
5SrRNA:CR33438	0	0	0	0	0	0	0	0	0	0	0	-1.30545	0	1	1
5SrRNA:CR33439	0	0	0	0	0	0	0	0	0	0	0	-1.30545	0	1	1
5SrRNA:CR33440	0	0	0	0	0	0	0	0	0	0	0	-1.30545	0	1	1
5SrRNA:CR33441	0	0	0	0	0	0	0	0	0	0	0	-1.30545	0	1	1
5SrRNA:CR33442	0	0	0	0	0	0	0	0	0	0	0	-1.30545	0	1	1
5SrRNA:CR33443	0	0	0	0	0	0	0	0	0	0	0	-1.30545	0	1	1
5SrRNA:CR33444	0	0	0	0	0	0	0	0	0	0	0	-1.30545	0	1	1
5SrRNA:CR33445	0	0	0	0	0	0	0	0	0	0	0	-1.30545	0	1	1
5SrRNA:CR33446	0	0	0	0	0	0	0	0	0	0	0	-1.30545	0	1	1
5SrRNA:CR33447	0	0	0	0	0	0	0	0	0	0	0	-1.30545	0	1	1
5SrRNA:CR33448	0	0	0	0	0	0	0	0	0	0	0	-1.30545	0	1	1
5SrRNA:CR33449	0	0	0	0	0	0	0	0	0	0	0	-1.30545	0	1	1
5SrRNA:CR33450	0	0	0	0	0	0	0	0	0	0	0	-1.30545	0	1	1
5SrRNA:CR33451	0	0	0	0	0	0	0	0	0	0	0	-1.30545	0	1	1
5SrRNA:CR33452	0	0	0	0	0	0	0	0	0	0	0	-1.29802	0	1	1
5SrRNA-Psi:CR33356	0	0	0	0	0	0	0	0	0	0	0	-1.30545	0	1	1
5SrRNA-Psi:CR33363	0	0	0	0.29389	0.172021	0	0	0.246747	0	0.253703	-0.294615	-0.868537	0.0441082	0.834221	1
5SrRNA-Psi:CR33371	0	0	0	0	0	0	0	0	0	0	0	-1.30545	0	1	1
5SrRNA-Psi:CR33416	0	0	0	0	0	0	0	0	0	0	0	-1.30545	0	1	1
7B2	451.295	445.563	436.447	477.571	489.057	437.69	424.45	426.626	414.106	385.629	0.138935	8.70109	3.04477	0.0845214	0.849634
7SLRNA:CR32864	0	0	0	0	0	0	0	0	0	0	0	-1.30545	0	1	1
7SLRNA:CR42652	0	0	0	0	0	0	0	0	0	0	0	-1.30545	0	1	1
825-Oak	0	0	0	0	0	0	0	0	0	0	0	-1.27624	0	1	1
a	36.9423	36.2342	24.1493	39.0873	33.8882	25.6878	30.5176	31.0902	37.0904	32.474	0.106906	5.16355	1.1703	0.527752	1
a10	0	0.147293	56.8565	0.29389	0.172021	0.997584	9.31834	0.246747	0	0	2.58444	4.14282	2.54326	0.114385	0.908739
A16	13.7286	17.6752	7.15102	17.9273	16.342	7.73127	12.5798	18.2593	14.1196	14.4611	0.096695	4.08445	0.253302	0.616029	1
A2bp1	258.346	215.048	252.865	206.605	202.813	229.694	236.686	209.982	243.827	289.222	-0.0904111	8.08675	0.460019	0.499411	1
a5	0	0	28.1352	0	0	0	4.19325	0	0	0	2.85968	2.31086	3.33378	0.0714592	0.810646
a6	20.2184	22.3886	21.6875	18.2212	19.6104	17.4577	19.5685	17.2723	16.8593	21.0574	0.154112	4.12068	1.73254	0.191537	0.909299
Aac11	281.56	277.059	234.46	269.203	289.856	258.873	287.238	305.72	278.599	312.309	-0.0939011	8.32881	1.91556	0.16988	0.908739
Aatf	10.9828	6.33362	4.80642	9.11058	11.0094	4.73852	5.82396	10.8569	10.3263	6.34258	0.107563	3.48866	0.246662	0.620686	1
Aats-ala	41.1857	40.5057	36.9274	38.4996	43.5214	36.4118	46.8247	43.921	54.3711	42.1148	-0.158948	5.90138	2.67624	0.105462	0.908739
Aats-ala-m	26.7083	28.5749	21.6875	22.9234	25.9752	21.6974	20.7333	22.454	23.1815	19.0278	0.231967	4.61228	5.28108	0.0239519	0.640483
Aats-arg	21.9657	21.7994	21.2186	21.7478	25.1151	19.4529	21.4322	23.9345	27.607	22.0722	-0.035708	4.53628	0.100086	0.752483	1
Aats-asn	63.6506	68.3442	42.7889	72.8847	69.6687	57.1117	65.9273	82.9071	84.2963	70.7832	-0.192688	6.68002	2.75021	0.100836	0.899562
Aats-asp	62.9017	60.5376	48.8848	51.1368	52.8106	43.1455	48.2224	44.6613	56.057	45.9203	0.212459	5.76218	4.28329	0.041449	0.748381
Aats-cys	20.468	19.1482	17.4672	18.5151	18.2343	21.6974	17.7048	24.6747	21.917	16.7444	-0.134627	4.79195	1.50702	0.2229	0.940938
Aats-gln	29.454	32.4046	16.7639	32.6218	29.9317	21.448	21.6651	29.6097	31.1896	22.0722	0.14983	4.91984	1.04518	0.309449	0.962661
Aats-glupro	64.649	67.9023	61.8973	64.9497	72.077	56.1141	64.0636	65.8815	68.4907	64.1869	0.0561844	6.55566	0.38903	0.534438	1
Aats-gly	36.9423	37.4125	31.0659	42.0262	37.1566	24.4408	30.7505	37.9991	31.4004	37.0407	0.186136	5.2344	2.70053	0.103917	0.908739
Aats-his	52.9173	42.7151	36.5757	40.8507	42.6613	47.3852	44.961	42.6873	46.5737	36.5333	-0.0216797	6.20688	0.0604215	0.806409	1
Aats-ile	69.142	75.5616	98.473	74.648	71.5609	113.725	115.547	108.569	116.118	113.152	-0.538462	7.46732	42.9671	3.77061e-09	5.73373e-06
Aats-leu	30.702	25.6291	31.1831	22.3356	24.427	28.9299	29.8187	32.0772	28.8715	28.4148	-0.136396	4.80907	2.07493	0.153318	0.908739
Aats-lys	111.326	118.719	83.5849	116.968	115.426	136.42	146.065	192.463	195.567	149.431	-0.589089	7.85531	23.95	4.49294e-06	0.00341606
Aats-met	10.234	7.80655	12.778	9.11058	9.46118	10.4746	11.415	11.3504	9.27259	8.87962	-0.0481849	3.32866	0.0870226	0.878969	1
Aats-phe	55.6631	61.716	60.725	56.4268	56.079	56.8623	54.2793	54.0377	49.3133	53.024	0.121699	5.58631	2.31127	0.132058	0.908739
Aats-pro	7.73791	9.72137	7.50271	9.99225	7.91299	9.97584	10.949	12.3374	7.37593	9.64073	-0.233407	3.24011	2.39328	0.12548	0.908739
Aats-ser	18.2215	12.6672	17.35	19.1028	14.2778	15.4625	16.773	15.2983	19.1774	13.9537	0.00272511	4.14288	0.000553457	0.981285	1
Aats-thr	95.1014	105.315	90.8531	107.858	108.718	81.8019	99.7062	113.751	115.486	95.3925	0.00338489	7.0199	0.00135111	0.970762	1
Aats-trp	32.4493	25.3345	27.1973	34.9729	30.7918	34.666	33.0801	28.3759	28.2393	35.2648	-0.0905208	4.88986	0.731421	0.394768	1
Aats-tyr	60.6553	62.1578	43.2578	55.8391	56.5951	50.1286	51.4838	56.5051	53.5282	55.8147	0.0554001	5.75944	0.295635	0.653695	1
Aats-tyr-m	11.4821	13.2564	8.67501	11.4617	14.9659	12.9686	13.9775	15.7918	15.5948	12.9389	-0.25636	3.8417	2.95026	0.089414	0.862635
Aats-val	51.6693	46.5447	38.9203	54.6635	50.2303	44.8913	50.552	56.9986	56.057	48.9647	-0.0967839	6.21767	0.881823	0.350298	0.992861
aay	198.44	180.729	146.068	196.612	156.023	138.165	164.702	145.581	143.304	141.313	0.257731	7.34883	2.85013	0.0949409	0.879333
ab	49.4228	44.188	43.844	48.4918	52.1225	39.9033	48.6883	47.3755	50.7885	46.174	0.0282641	5.66372	0.090028	0.925035	1
ABCB7	77.1295	81.1587	73.0342	79.938	90.6553	74.0706	73.3819	87.1018	72.9163	72.3055	0.0817597	6.25171	1.1668	0.28304	0.948688
abd-A	0	0.147293	0	0	0	0	0.931834	0	0	0	-1.83928	-0.907285	2.14654	0.149009	0.908739
Abd-B	0	0	0	0	0.172021	0	0.465917	0	0	0	-0.986727	-0.982545	0.57091	0.453111	1
Abi	49.1732	53.6148	57.7943	55.8391	50.7463	54.6177	56.8419	51.5702	53.5282	55.8147	-0.0267306	5.77172	0.108755	0.797893	1
Abl	214.165	196.195	183.465	206.605	197.997	168.342	204.072	189.255	203.786	201.44	0.0452598	7.48554	0.286033	0.594135	1
abo	14.2278	9.57408	13.8331	10.58	10.8374	14.465	10.949	7.64917	9.48333	8.87962	0.200735	3.41129	1.75948	0.188154	0.908739
Abp1	41.4353	47.7231	46.0713	59.0719	43.5214	35.1648	46.5917	48.1157	42.7804	40.8462	0.151176	5.48132	2.04797	0.155984	0.908739
abs	26.4587	24.0088	20.1635	19.1028	23.911	22.695	21.8981	24.428	23.8137	22.3259	-0.0192428	4.50635	0.0316321	0.85925	1
ac	0	0	0	0	0	0	0	0	0	0	0	-1.28411	0	1	1
Ac13E	112.075	98.8339	123.326	95.2203	86.0107	114.473	119.508	100.673	121.176	110.361	-0.134355	6.94107	1.57166	0.213318	0.928486
Ac3	288.05	260.415	347.938	236.875	247.367	298.527	320.318	262.786	286.818	307.742	-0.0953776	8.03186	1.20834	0.274687	0.948688
Ac76E	128.549	120.928	159.433	120.201	120.931	143.901	146.764	115.724	116.75	125.583	0.00492408	6.85816	0.00269567	0.958711	1
Ac78C	42.4337	38.8855	46.1885	39.969	35.4364	33.1697	43.0973	34.5446	37.5119	37.8018	0.125086	5.22541	1.4718	0.228339	0.946541
Acam	0	0	0	0	0	0	0	0	0	0	0	-1.30545	0	1	1
ACC	400.874	473.696	350.048	447.3	485.789	307.755	363.881	420.457	478.803	362.035	0.158254	8.90643	0.97598	0.325927	0.975653
AcCoAS	484.244	521.566	499.751	479.04	527.934	458.14	492.008	515.455	527.063	455.398	0.0376265	9.16212	0.141286	0.707919	1
Ace	494.228	440.407	572.668	417.03	414.572	500.039	539.765	432.055	508.307	539.881	-0.107144	8.88857	0.985585	0.323571	0.973759
Acer	31.9501	55.0878	32.121	45.259	50.2303	28.1817	39.8359	38.4926	60.0611	37.0407	0.0730625	6.12843	0.0856725	0.770448	1
Acf1	54.6646	49.0487	40.5615	51.1368	49.1981	37.4094	47.5235	47.1287	44.2556	51.7555	0.096385	5.60763	0.46934	0.495109	1
achi	13.2293	13.6983	13.3642	13.5189	14.7938	12.4698	12.8127	11.1036	14.3304	12.9389	0.107005	3.75878	0.567668	0.453217	1
acj6	22.9641	23.8615	21.6875	21.7478	24.7711	22.695	20.5003	29.6097	22.9707	26.1314	-0.0811248	4.6953	0.463221	0.497926	1
Ack	103.588	106.051	97.3007	96.9836	102.869	107.49	124.167	110.296	116.329	110.868	-0.167349	7.19358	4.91266	0.029264	0.672823
Ack-like	99.5944	94.1205	88.743	87.8731	86.5268	90.5307	101.104	94.0107	94.4119	101.481	-0.0762512	6.48884	0.91258	0.342072	0.983473
Acn	213.167	249.81	140.207	267.734	263.021	156.371	177.048	274.383	202.522	211.842	0.147943	8.02257	1.03892	0.310892	0.963196
Acon	1595.01	1676.05	1702.65	1450.05	1498.48	1644.27	1443.88	1636.92	1291	1457.78	0.084203	10.3481	0.922305	0.339527	0.981853
Acox57D-d	4.9922	5.74445	3.98581	7.05336	5.33267	3.74094	3.72734	5.42844	5.69	4.05925	0.226784	3.01144	0.720056	0.39845	1
Acox57D-p	16.2247	17.6752	14.302	15.8701	19.9545	14.2156	18.4037	14.8048	16.4378	12.9389	0.127237	4.5567	0.526021	0.470227	1
Acp1	19.9688	26.9547	58.146	28.2134	31.996	35.913	17.9378	26.6487	48.8919	19.7889	0.164264	5.03699	0.107907	0.743327	1
Acp24A4	0	0	0	0	0	0.249396	0	0	0	0	-1.53045	-1.0255	2.04158	0.19043	0.908739
Acp26Aa	0	0	0	0	0	0	0	0	0	0	0	-1.29083	0	1	1
Acp26Ab	0	0.147293	0	0	0	0	0	0	0	0	1.24586	-1.23446	1.33786	0.293262	0.948688
Acp29AB	0	0	0	0	0	0	0	0	0	0	0	-1.30545	0	1	1
Acp32CD	0	0	0	0	0	0	0	0	0	0	0	-1.30545	0	1	1
Acp33A	0	0	0	0	0	0	0	0	0	0	0	-1.29789	0	1	1
Acp36DE	0	0	0	0.29389	0.172021	0	0	0.246747	0	0	0.435983	-0.929386	0.108331	0.742879	1
Acp53C14a	0	0	0	0	0	0	0	0	0	0	0	-1.19275	0	1	1
Acp53C14b	0.24961	0	0.468919	0	0	0	0	0	0	0	2.91319	-0.895409	4.65617	0.0338259	0.704179
Acp53C14c	0.49922	0	0.11723	0	0	0	0.232958	0	0.210741	0	0.162886	-0.966979	0.0192943	0.911959	1
Acp53Ea	0	0.147293	0	0	0	0.249396	0.232958	0	0	0	-1.00742	-0.984184	0.772374	0.398093	1
Acp54A1	0	0	0	0	0	0	0	0	0.210741	0	-1.51454	-1.18854	2.22159	0.19043	0.908739
Acp62F	0	0.147293	0.11723	0	0	0	0	0	0	0	1.87523	-1.13416	1.93385	0.170863	0.908739
Acp63F	0	0	0	0	0	0	0	0	0	0	0	-1.10316	0	1	1
Acp65Aa	1.99688	2.50399	2.69629	2.9389	2.4083	0.748188	0.698875	1.48048	2.52889	2.02963	0.722087	2.47901	3.02638	0.08545	0.850958
Acp76A	0	0	0	0	0	0	0	0	0	0	0	-1.27716	0	1	1
Acp95EF	0	0	0.11723	0	0	0.249396	0	0	0	0	-0.310268	-1.14502	0.0495215	0.824947	1
Acp98AB	0	0	0	0	0	0	0	0	0	0	0	-1.29789	0	1	1
Acph-1	17.9719	14.7293	22.2737	17.9273	16.342	18.2059	19.1026	12.5841	17.4915	18.0129	0.0662144	4.23042	0.271112	0.603907	1
Acsl	241.623	280.152	260.485	239.814	266.805	246.653	297.022	234.903	274.174	246.346	-0.0108744	8.5732	0.00801791	0.928856	1
Act42A	53.4166	44.7772	44.6646	48.4918	39.2209	37.9082	47.5235	43.921	42.1482	35.2648	0.152128	5.39883	1.14714	0.287105	0.948688
Act57B	2773.92	2190.4	2883.38	1749.23	1873.31	3108.22	1565.25	1796.32	2144.08	1816.26	0.137273	10.9548	0.584738	0.446526	1
Act5C	1122.25	1118.1	1065.62	1206.12	1226.51	910.295	1112.84	1134.79	1141.16	1052.11	0.100713	9.9438	2.24212	0.137909	0.908739
Act79B	62.1529	812.029	43.6095	32.9157	140.197	726.241	257.419	97.2184	49.7348	49.9796	-0.10315	8.36959	0.0146504	0.903939	1
Act87E	243.37	412.422	218.751	177.509	223.456	371.6	241.112	236.877	217.484	196.113	0.0164339	8.18575	0.0038036	0.950964	1
Act88F	7.98752	21.9467	6.33041	6.75947	12.5576	22.1962	9.78426	5.92194	6.32222	8.37221	0.114244	3.61698	0.0496918	0.824122	1
Actbeta	153.261	133.153	203.159	127.548	118.695	188.793	190.094	143.113	164.589	200.172	-0.266493	7.20421	5.03785	0.0273309	0.662775
Actn	350.952	483.564	255.913	301.237	340.43	369.355	259.982	375.796	288.504	310.787	0.111033	8.30717	0.503547	0.47984	1
Actn3	0	0	0.11723	0	0	0	0	0.246747	0	0	-0.310016	-1.25495	0.0590244	0.829654	1
ACXA	0	0	0	0	0	0.249396	0	0	0	0	-1.53064	-1.28427	2.39528	0.19043	0.908739
ACXB	0.49922	0.736467	0.937839	1.46945	0.172021	0.748188	0	0.246747	0	0.253703	1.53012	-0.188097	4.10541	0.0458031	0.7694
ACXC	4.74259	2.94587	5.04088	1.17556	4.47256	5.23731	5.35805	3.20772	2.95037	3.55185	-0.106632	1.58053	0.101486	0.750816	1
ACXD	1.99688	2.79858	1.64122	1.17556	2.23628	1.74577	2.56254	1.72723	2.31815	2.53703	-0.117487	1.66969	0.123521	0.726095	1
ACXE	0	0	0	0	0	0	0	0	0	0	0	-1.27726	0	1	1
Acyp	0	0	0	0	0	0	0	0	0	0	0	-1.30545	0	1	1
Acyp2	15.4758	20.1792	21.8047	16.1639	20.1265	24.4408	17.7048	20.9735	15.3841	21.8185	-0.0804614	4.2141	0.359853	0.78377	1
Ada	1.74727	1.32564	1.87568	1.76334	3.26841	3.49154	3.02846	3.45446	2.73963	2.28333	-0.576053	1.22826	2.47991	0.118931	0.908739
Ada1-1	0.24961	0.147293	0	0	0	0	0	0	0	0	1.93287	0.257103	3.04514	0.137192	0.908739
Ada1-2	4.24337	5.15527	4.45473	3.23279	4.8166	4.48913	5.82396	5.42844	4.21482	3.80555	-0.0995319	1.92399	0.138726	0.710455	1
Ada2a	21.2169	22.5359	21.3358	26.1562	24.9431	18.9541	23.0629	27.1422	19.3882	22.5796	0.0613705	4.3059	0.244093	0.622508	1
Ada2b	29.2044	23.567	21.3358	22.0417	22.1908	25.189	21.1992	18.7528	22.76	18.5203	0.147188	4.62074	0.870039	0.353521	0.995275
Adam	62.9017	70.9955	39.272	83.1708	83.2584	48.3828	53.3475	80.6864	69.7552	55.561	0.134422	6.35124	1.18106	0.280136	0.948688
AdamTS-A	39.4384	56.708	50.4088	39.0873	44.5536	47.3852	44.961	49.843	39.4085	42.1148	0.0498209	5.25049	0.196831	0.65839	1
Adar	219.906	223.886	314.645	208.956	190.772	271.842	274.658	204.06	253.521	303.429	-0.173133	8.07901	1.27111	0.262653	0.948688
adat	12.9797	9.27949	12.3091	10.58	12.7296	8.97825	10.2502	7.15567	8.85111	7.8648	0.421914	3.48332	8.08123	0.00556989	0.395819
ade2	53.4166	52.8784	29.4247	76.1175	52.4665	28.4311	39.37	41.947	51.6315	28.1611	0.45993	6.24837	2.84148	0.0954362	0.881783
ade3	62.9017	70.259	39.0375	64.9497	90.3113	24.6902	45.8928	39.4796	61.1148	28.4148	0.705189	6.35801	4.88853	0.0296529	0.674835
ade5	71.3885	117.687	49.5882	106.388	122.823	28.4311	72.6831	59.7129	104.949	45.1592	0.581955	7.20821	1.80313	0.18282	0.908739
AdenoK	36.4431	44.188	31.3004	37.9118	39.2209	27.9323	32.6142	39.9731	41.0944	31.2055	0.126872	5.52498	0.689843	0.408487	1
Adf1	43.9314	39.6219	41.0304	43.2018	41.4572	44.6419	50.785	42.4405	46.1522	47.4425	-0.147999	5.6231	3.95159	0.0499652	0.798139
Adgf-A	28.7052	37.2652	61.194	25.5684	30.2758	55.1165	34.2449	42.6873	33.9293	36.5333	-0.122947	5.16835	0.423262	0.517025	1
Adgf-B	0	0	0	0	0	0	0	0	0	0	0	-1.27097	0	1	1
Adgf-C	18.4711	28.7222	26.4939	22.0417	26.1473	34.666	26.0914	30.8434	23.8137	31.4592	-0.256009	4.22786	4.42175	0.0383665	0.729687
Adgf-D	49.922	41.9786	28.7213	44.3774	57.1111	39.654	47.7565	51.0767	52.053	34.7574	-0.0288708	5.49283	0.0226456	0.88073	1
Adgf-E	0	0	0	0	0	0	0	0	0	0	0	-1.26896	0	1	1
Adh	5.49142	5.89174	6.79933	4.11446	8.08501	8.72886	7.45467	7.15567	6.95445	6.84999	-0.262465	2.74188	1.31751	0.254179	0.948688
Adhr	0	0	0	0	0	0	0	0	0	0	0	-1.30545	0	1	1
AdipoR	257.098	288.548	328.947	276.55	276.955	312.493	295.624	255.63	316.322	267.403	-0.0187734	8.40093	0.0156919	0.9006	1
Adk1	120.562	135.215	90.5014	104.331	114.566	125.446	106.462	125.101	106.424	108.331	-0.0166213	6.8587	0.0253635	0.873833	1
Adk2	57.9095	62.4524	62.8352	62.5985	65.7122	62.349	61.2681	56.7519	63.2222	59.874	0.0383413	5.98828	0.17338	0.678149	1
Adk3	9.48518	13.8456	11.1368	14.1067	13.2457	13.218	14.4434	9.3764	13.4874	12.4315	-0.0286632	3.90132	0.0441611	0.834044	1
AdoR	15.2262	12.9618	16.7639	13.8128	15.826	10.724	13.9775	17.7658	11.1693	15.2222	0.121613	3.65462	0.928273	0.337977	0.980972
adp	35.9439	36.6761	30.597	28.8012	32.168	29.4287	28.4209	31.3369	34.14	28.1611	0.116398	4.9795	1.3507	0.248327	0.948688
AdSL	20.9672	27.5439	21.3358	27.3318	26.4913	20.6999	21.4322	19.7398	25.0782	15.2222	0.269593	4.98217	0.948639	0.332761	0.977536
AdSS	194.446	156.131	133.408	150.765	146.046	151.383	146.764	152.49	147.097	142.328	0.07559	7.13285	0.758588	0.386163	1
Ady43A	47.1763	42.2732	33.5277	36.4423	34.0602	39.9033	35.4097	42.6873	36.2474	48.9647	-0.0727003	4.94961	0.427369	0.515003	1
Aef1	57.6599	64.9564	64.4764	62.3046	70.1848	55.8647	72.916	70.8165	67.0156	71.798	-0.0807995	6.19739	1.16711	0.282975	0.948688
aft	11.9813	11.6362	13.5987	10.2861	11.0094	16.2107	9.78426	12.8309	13.6981	14.2074	-0.178568	3.6584	1.40887	0.238469	0.948688
Afti	99.0952	92.6476	116.644	97.2775	82.0542	104.497	108.792	96.9717	96.5193	102.75	-0.0619594	6.49132	0.574584	0.450487	1
Ag5r	0.74883	1.47293	1.05507	474.632	19.9545	27.9323	172.156	0.986989	426.961	387.405	-1.07725	5.38462	0.923057	0.339331	0.981853
Ag5r2	0.49922	0	0.23446	0	0.172021	0	0.232958	0	0.210741	0	0.754521	-0.242649	0.492797	0.484642	1
AGBE	87.3635	107.966	77.02	76.4114	105.449	88.7849	72.6831	86.1148	84.2963	75.0962	0.160518	6.55845	1.56557	0.214199	0.9309
ago	90.6085	85.7248	84.2882	90.5181	87.903	69.8309	87.8254	85.3746	85.7715	91.5869	0.0613414	6.43563	0.346451	0.557651	1
AGO1	412.855	405.941	483.925	380.293	326.153	406.515	446.581	373.822	391.135	444.742	-0.0375074	8.70067	0.143841	0.705414	1
AGO2	317.504	269.547	260.485	250.982	263.193	259.122	259.749	283.266	274.806	252.689	0.0340723	8.02896	0.361302	0.549344	1
AGO3	0	0.736467	0.586149	0	0.344043	0.498792	1.39775	0	0.842963	0.253703	-0.569429	1.72367	0.322176	0.571762	1
agt	5.74103	6.33362	6.91656	2.64501	6.19277	9.72644	8.15355	6.41543	7.16519	7.6111	-0.443497	3.02149	6.37557	0.0142352	0.539933
Ahcy13	25.7098	26.8074	11.8402	28.2134	35.9525	14.465	23.7618	27.8824	29.293	16.4907	0.181023	5.14826	0.508001	0.477909	1
Ahcy89E	8.23713	14.5821	13.9503	11.4617	12.9016	11.971	6.98875	12.3374	11.8015	11.6704	0.17926	3.9297	1.23107	0.27025	0.948688
AIF	32.6989	36.3815	31.5348	32.9157	30.9639	29.4287	34.7108	34.0511	34.14	34.5037	-0.0205418	5.11289	0.0356843	0.850608	1
Ak6	2.4961	3.24046	5.27534	4.11446	3.78447	4.23973	4.65917	3.20772	3.79333	6.59629	-0.221772	2.27996	0.717041	0.399435	1
Akap200	118.814	135.068	76.7855	147.533	131.252	82.55	108.559	151.503	113.589	111.883	0.0974763	7.18903	0.530985	0.468146	1
Akh	0	0.147293	0.11723	0.29389	0	4.98792	0.465917	0	0	0.253703	-3.13154	-0.0962036	10.0672	0.00208506	0.269323
AkhR	17.9719	32.5519	17.5845	19.3967	20.8146	12.9686	27.2561	19.2463	27.607	18.2666	0.0434793	5.25501	0.0253221	0.873935	1
akirin	72.3869	72.0265	59.7872	71.1213	65.5402	70.0803	70.8194	69.336	69.123	75.0962	-0.0586343	6.41533	0.308704	0.579899	1
Akt1	84.1186	78.2128	83.1159	75.2358	71.0449	79.5573	88.2913	72.0502	87.4574	94.6314	-0.10713	6.42941	1.52801	0.219732	0.93666
al	0.49922	1.03105	0.703379	0.881669	0.688086	0.748188	0.698875	1.48048	0.421482	1.26852	-0.245783	0.104309	0.186722	0.666726	1
Alas	197.442	198.404	188.154	186.032	181.483	211.737	177.048	197.398	169.014	179.368	0.0262042	7.52471	0.101037	0.751349	1
alc	138.783	156.131	105.507	153.117	151.379	102.751	102.735	145.087	120.544	112.391	0.270957	6.94057	5.50129	0.0212726	0.625589
ald	3.74415	3.24046	3.39966	2.9389	4.30054	4.23973	3.72734	3.94796	4.42556	4.05925	-0.205643	2.20971	0.633561	0.428214	1
Ald	1688.86	1729.08	1725.04	1448.88	1576.23	1897.4	1496.53	1555.5	1512.91	1622.43	0.0149217	10.6658	0.0221465	0.882042	1
Aldh	586.833	734.111	594.355	615.111	679.485	618.003	505.52	612.674	635.594	490.916	0.165277	9.09651	2.26129	0.136258	0.908739
Aldh-III	129.548	149.503	144.193	128.724	151.379	110.233	124.167	137.438	138.878	128.628	0.138919	7.27405	3.26622	0.0741701	0.810646
Alg10	8.23713	5.89174	9.96453	9.40447	7.39692	6.73369	7.68763	7.15567	9.90482	9.38702	-0.00699051	3.09181	0.00137499	0.970505	1
Alg-2	28.7052	34.7613	59.3183	24.3929	26.6633	51.8744	50.785	31.5837	44.0448	46.174	-0.346599	5.25046	3.56859	0.0622068	0.804465
Alh	150.016	146.852	135.869	125.491	155.851	125.446	152.355	148.048	132.134	139.537	0.0345641	6.99064	0.152399	0.697205	1
alien	50.9205	55.6769	45.3679	55.2513	53.8427	45.3901	51.9497	65.388	53.5282	48.711	-0.0236485	5.71128	0.0660137	0.797837	1
ALiX	192.699	162.465	128.132	163.109	166.345	121.955	148.395	169.515	143.936	142.328	0.160611	7.20162	4.0891	0.0462263	0.770435
Alk	281.81	227.716	288.151	215.127	211.586	259.621	293.761	222.566	254.575	285.924	-0.104037	7.92558	0.903876	0.344373	0.987202
AlkB	3.74415	3.09316	4.92365	2.64501	3.44043	4.73852	4.42621	2.46747	5.05778	4.56666	-0.224815	2.43405	0.846466	0.360093	1
alph	102.839	112.974	88.743	116.968	109.578	87.0392	95.28	118.685	111.693	105.287	0.0340142	6.87359	0.160573	0.918288	1
alpha4GT1	27.4571	23.1251	35.4034	25.5684	31.6519	32.6709	33.0801	24.6747	30.9789	35.2648	-0.122695	4.83614	1.10036	0.297086	0.950971
alpha4GT2	0.24961	0	0.11723	0	0	0	0	0	0	0	1.91791	-1.23499	2.95242	0.137192	0.908739
alpha-Cat	154.259	170.419	223.792	141.361	157.228	206.5	221.776	179.632	193.671	213.872	-0.25844	7.629	7.75128	0.00658191	0.404729
alpha-catenin-related	108.081	113.563	99.0592	110.503	120.587	94.5211	99.9392	106.595	100.313	105.287	0.122794	6.6393	2.63224	0.108325	0.908739
alphaCOP	112.325	109.439	100.466	129.312	117.147	101.005	105.763	112.517	130.027	112.137	0.0156873	6.68801	0.0436905	0.834918	1
alpha-Est1	43.4322	64.3672	70.8068	46.4346	60.2075	44.8913	44.961	63.9076	57.3215	39.324	0.196717	5.76452	2.47034	0.119636	0.908739
alpha-Est10	8.73635	15.7604	20.1635	14.1067	15.1379	12.2204	13.2786	11.3504	12.223	11.4167	0.310954	4.06219	3.15362	0.0792481	0.829603
alpha-Est2	5.49142	24.1561	7.61994	8.22891	15.3099	6.48429	10.949	11.8439	12.8552	4.82036	0.397171	4.11055	1.14428	0.287703	0.948688
alpha-Est3	21.7161	21.063	17.7017	27.3318	18.5783	20.4505	14.2105	21.2203	24.0244	18.0129	0.105005	3.90687	0.454722	0.577752	1
alpha-Est4	1.74727	3.09316	3.28243	2.05723	2.4083	3.49154	1.86367	2.46747	2.52889	1.77592	0.0908845	1.25973	0.0846555	0.771776	1
alpha-Est5	3.74415	3.97692	4.45473	4.40835	3.26841	1.24698	3.72734	3.20772	2.73963	1.77592	0.631548	2.35062	3.46923	0.0658888	0.804465
alpha-Est6	0	0.294587	0	0.29389	0.172021	0	0	0	0	0	2.74029	-1.20678	4.93262	0.0355543	0.716704
alpha-Est7	118.814	161.286	132.352	132.25	137.101	108.487	96.6778	131.763	138.246	107.57	0.227343	6.97623	2.0414	0.156642	0.908739
alpha-Est8	62.9017	83.5154	114.182	76.7052	82.9143	81.0537	80.3707	75.5047	78.6063	81.9462	0.0866823	6.04423	0.620815	0.432882	1
alpha-Est9	97.8472	102.369	107.617	83.4647	85.8387	124.199	110.888	108.816	100.313	111.883	-0.217928	6.67177	5.54514	0.0207779	0.621738
alphagamma-element:CR32865	0	0	0	0.29389	0	0	0.232958	0	0.210741	0.253703	-1.42475	-0.860855	1.73468	0.191815	0.909921
alphaKap4	0	0	0	0	0	0	0	0	0	0	0	-1.30545	0	1	1
alpha-Man-I	168.487	160.55	208.083	158.994	155.163	181.81	189.162	162.113	184.609	193.576	-0.0969236	7.51135	1.2224	0.271933	0.948688
alpha-Man-Ib	90.6085	110.912	133.29	97.8653	104.417	123.451	122.536	98.4522	107.478	114.674	-0.0731493	6.69664	1.0038	0.662274	1
alpha-Man-II	51.4197	50.9635	52.05	54.6635	44.7256	53.8695	46.8247	49.3495	48.8919	44.3981	0.0592856	5.58535	0.522297	0.471798	1
alpha-Man-IIb	173.978	164.232	188.857	156.055	160.324	171.584	178.213	163.84	181.869	198.65	-0.0833431	7.24135	1.14828	0.286867	0.948688
alphaSnap	434.322	426.267	387.679	449.358	430.742	388.808	419.558	431.808	427.804	431.042	0.0196535	8.8774	0.0826857	0.774373	1
alpha-Spec	806.989	789.64	511.708	734.725	741.412	520.988	651.818	788.851	680.482	682.462	0.108149	9.43372	0.945716	0.333503	0.97817
alphaTry	0	0	0.11723	0.29389	0.172021	0	0	0	0	0	2.36872	3.80672	0.172612	0.67905	1
alphaTub67C	1.99688	2.50399	2.3446	2.64501	2.75234	3.24215	1.39775	0.986989	1.68593	2.28333	0.359051	2.91972	0.380834	0.538766	1
alphaTub84B	1113.51	1308.7	1172.3	1281.65	1300.65	1064.67	1028.74	1125.41	1083.42	1051.35	0.206367	9.96489	9.20382	0.00318204	0.306623
alphaTub84D	182.715	185.148	184.754	188.383	200.405	165.599	156.082	170.502	146.254	156.789	0.243691	7.14797	8.45984	0.00460523	0.363357
alphaTub85E	3.99376	6.33362	5.74426	2.64501	3.78447	10.724	4.65917	8.63616	3.58259	5.07407	-0.495145	1.55942	1.07408	0.302892	0.956509
Alr	16.9735	17.6752	14.4193	18.8089	17.7182	18.2059	14.2105	15.2983	16.227	14.4611	0.119506	4.03777	0.684861	0.410178	1
alrm	59.9064	43.5989	72.0963	40.8507	72.249	97.015	114.849	67.8555	83.6641	69.0073	-0.57629	5.76075	12.2109	0.000749065	0.152697
alt	109.08	107.23	54.7463	98.4531	112.674	58.3586	77.5752	111.53	89.9863	90.8258	0.166881	6.7302	1.39848	0.240193	0.948688
aly	0	0	0	0	0.172021	0.249396	0	0	0	0	-0.269203	-1.19464	0.046625	0.829902	1
Ama	0.74883	0.44188	0.468919	1.17556	0.172021	0.498792	1.39775	0.493495	0.842963	0.253703	-0.351167	0.549713	0.252429	0.616637	1
amd	5.49142	6.48091	8.55778	3.82057	3.61245	6.48429	5.35805	6.90893	7.37593	7.3574	-0.215529	3.00778	0.894895	0.377506	1
amn	0	0	0	0	0	0	0.232958	0	0	0.253703	-2.25496	-0.866817	3.49817	0.0649542	0.804465
Amnionless	5.99064	5.15527	4.3375	3.23279	5.50469	5.9855	4.19325	2.96097	3.79333	5.83518	0.101541	2.53841	0.237065	0.627556	1
amon	381.903	334.062	396.94	355.901	332.517	366.113	384.614	326.2	357.206	407.194	-0.0316279	8.41766	0.213272	0.645365	1
amos	0	0	0	0	0	0	0	0	0	0	0	-1.26955	0	1	1
AMPdeam	340.967	330.527	315.231	336.504	328.733	322.22	313.795	333.849	306.839	314.338	0.0539999	8.27517	1.12828	0.291077	0.948688
Amph	250.858	246.864	266.112	228.646	279.191	284.311	280.482	286.967	291.454	300.385	-0.182221	7.90393	5.58192	0.0203722	0.619508
AMPKalpha	251.357	250.546	264.939	235.112	252.872	251.391	245.771	231.942	228.864	227.065	0.0830751	7.73229	1.76901	0.186974	0.908739
Amun	117.816	122.695	84.7572	112.854	124.888	83.797	95.513	129.049	115.064	108.585	0.0799138	6.95354	0.527877	0.469447	1
amx	9.9844	11.4889	8.90947	13.8128	12.7296	12.4698	11.8809	11.1036	9.06185	12.9389	-0.0220319	3.53417	0.0210978	0.884848	1
Amy-d	10.4836	8.10114	2.22737	5.29002	4.8166	2.99275	6.98875	0.986989	5.69	2.28333	0.626418	4.18998	0.375603	0.541561	1
Amy-p	12.4805	0.294587	0.11723	0	0.344043	0	8.15355	0	0.210741	2.02963	0.0361837	4.05434	0.000426454	0.983571	1
Amyrel	0	0	0	0	0	0	0	0.246747	0.210741	0	-2.24374	-1.10889	4.14041	0.0640775	0.804465
ana	27.9563	16.9387	19.1085	19.9845	25.1151	29.9275	30.9835	25.415	25.9211	25.624	-0.345428	4.602	7.90852	0.00607768	0.401823
ana1	22.2153	23.2724	14.771	19.9845	21.5027	12.7192	18.8696	19.7398	20.2311	19.0278	0.159642	4.4177	1.20495	0.275358	0.948688
ana2	1.49766	3.24046	1.05507	3.23279	1.54819	1.49638	1.63071	2.46747	1.89667	2.28333	0.0773748	1.6057	0.0316657	0.859176	1
ana3	2.99532	3.24046	3.98581	2.9389	2.4083	3.99033	4.89213	2.46747	4.21482	4.05925	-0.314566	2.39249	0.85917	0.35653	0.998484
Ance	27.7067	34.0248	31.0659	32.6218	34.9204	31.1745	24.9266	29.3629	27.3963	30.1907	0.167454	4.75568	1.95649	0.165437	0.908739
Ance-2	0	0	0	0.29389	0	0	0	0	0	0	1.3013	-0.986552	1.29175	0.293262	0.948688
Ance-3	26.4587	28.5749	43.7267	24.099	24.427	41.6491	30.5176	28.3759	28.45	24.6092	-0.0443157	5.00663	0.0969957	0.756209	1
Ance-4	9.73479	22.9778	8.67501	34.679	23.3949	5.73611	10.949	8.14266	25.7104	8.62591	0.698266	4.81059	2.17318	0.144038	0.908739
Ance-5	25.7098	31.5208	19.1085	20.8662	29.7597	12.2204	14.9093	24.1812	27.607	19.7889	0.36166	4.95008	2.82225	0.0965466	0.885126
Andorra	0.24961	0.147293	0.11723	0	0.172021	0	0	0.246747	0	0	1.1804	-0.947028	1.10801	0.295888	0.950146
angel	10.4836	8.83761	6.6821	9.99225	11.6975	7.98067	9.08538	11.1036	9.27259	7.6111	0.0649801	3.31618	0.142344	0.894461	1
Ank	616.287	603.314	962.574	548.986	510.56	865.404	803.474	588.492	717.151	813.373	-0.223769	9.40695	3.49972	0.0647344	0.804465
Ank2	1604.74	1716.85	1161.63	1665.77	1606.34	1101.33	1326.47	1676.15	1424.82	1454.99	0.151019	10.5443	1.87939	0.173923	0.908739
Anp	0	0	0	0	0	0	0	0	0	0	0	-1.16203	0	1	1
Ant2	7.4883	4.71339	4.68919	3.52668	3.61245	4.73852	3.26142	4.44145	3.58259	5.32777	0.167767	2.25148	0.525485	0.470453	1
antdh	1.49766	4.27151	19.8118	3.23279	4.12851	3.24215	3.72734	2.96097	3.37185	1.01481	1.32468	4.10634	3.31665	0.0720119	0.810646
Antp	2.24649	3.24046	4.45473	0.58778	1.72021	1.74577	2.09663	2.96097	1.47519	2.28333	0.312657	1.83749	0.632958	0.428433	1
antr	0	0.147293	0.11723	0.29389	0	0	0.465917	0	0.210741	0	-0.350232	-0.352539	0.153148	0.709414	1
AnxB10	154.758	184.411	122.036	169.574	180.795	124.947	115.314	155.698	133.61	121.524	0.31693	7.11947	7.42411	0.00777586	0.426714
AnxB11	63.9002	53.7621	65.4142	55.8391	51.9505	61.3514	64.0636	56.2584	71.8626	69.0073	-0.149221	5.98859	3.00536	0.0865249	0.853866
AnxB9	269.829	274.26	273.263	275.669	278.847	249.895	258.817	262.046	277.967	247.107	0.0821392	7.88553	1.40184	0.239634	0.948688
aop	70.39	56.2661	63.5386	49.0796	55.907	60.3538	67.325	59.9596	55.0033	62.9184	-0.0480209	5.8666	0.258855	0.612193	1
aos	21.4665	28.2803	28.7213	21.454	26.3193	22.9444	24.4606	22.9475	23.1815	24.6092	0.107075	4.62307	1.06741	0.30439	0.957283
Aos1	15.2262	15.9077	15.826	17.6334	18.7503	15.7119	13.9775	13.0776	15.5948	14.2074	0.196968	4.076	1.43168	0.234734	0.948688
ap	86.1155	69.6698	82.1781	64.6558	67.4324	76.3152	78.507	69.336	89.3541	77.8869	-0.0805543	6.32417	0.492403	0.484727	1
AP-1-2beta	161.747	170.713	134.463	166.636	174.946	123.451	126.264	160.633	146.465	141.82	0.209792	7.1575	7.54384	0.00731465	0.423364
AP-1gamma	142.278	139.487	145.131	132.838	140.542	133.427	156.082	128.309	155.527	141.313	-0.029135	7.18281	0.16492	0.685661	1
AP-1mu	64.8986	70.8482	61.3112	78.4686	79.1299	62.5984	61.0351	65.1413	60.9041	64.9481	0.170944	5.97381	4.42072	0.0383885	0.729687
AP-1sigma	79.8752	83.3681	131.18	85.5219	90.8273	122.952	117.411	88.829	108.742	115.942	-0.229498	6.64705	3.85953	0.0526494	0.804465
AP-2alpha	236.88	238.763	266.229	218.948	234.809	228.197	256.72	242.553	246.988	247.868	-0.0310697	7.9051	0.266096	0.795495	1
AP-2mu	122.559	102.074	119.926	119.319	104.761	119.959	117.644	115.231	112.114	118.733	-0.0386391	6.75881	0.304106	0.582731	1
AP-2sigma	64.1498	67.9023	73.2686	65.5374	70.3568	77.3127	62.4329	60.9466	61.5363	63.4258	0.0697753	5.85736	0.62029	0.433076	1
Apc	245.367	229.336	211.248	233.642	218.467	176.323	225.97	242.799	210.319	238.735	0.05615	7.69237	0.365653	0.546954	1
APC10	7.98752	7.07009	8.55778	7.93503	6.88086	6.98309	7.92059	7.40242	6.53296	6.59629	0.116499	3.01766	0.466748	0.496299	1
Apc2	2.24649	3.24046	2.22737	2.64501	2.75234	2.49396	0.698875	2.71422	3.37185	2.28333	0.178549	1.89929	0.191171	0.663025	1
APC4	7.98752	7.36467	10.3162	9.69836	9.80522	7.98067	9.08538	14.5581	10.9585	8.87962	-0.186233	3.47742	1.21543	0.273294	0.948688
APC7	0.49922	0.44188	0.703379	0.29389	0.688086	0.498792	0.931834	0.986989	0.421482	0.507407	-0.261937	1.33568	0.0993192	0.753401	1
ApepP	14.2278	8.83761	15.3571	14.1067	13.2457	15.4625	13.2786	10.6101	13.2767	12.9389	-0.000748206	3.92877	2.07512e-05	0.996376	1
Apf	13.4789	15.7604	14.1848	13.225	17.2021	12.2204	12.5798	17.7658	12.223	11.1629	0.170081	3.66228	1.26402	0.263979	0.948688
aph-1	9.73479	11.9308	16.0605	14.1067	12.7296	15.7119	16.3071	11.8439	11.1693	12.1778	-0.048048	3.69076	0.110743	0.906692	1
Aph-4	74.1342	80.1276	69.5173	84.0525	86.5268	71.826	56.8419	90.3095	71.4411	66.4703	0.143041	5.88498	1.61662	0.206946	0.920636
aPKC	234.384	191.776	243.017	191.91	187.331	189.292	231.794	173.71	193.882	222.244	0.0529747	7.76923	0.337011	0.563057	1
Aplip1	200.187	188.978	190.498	201.315	196.621	167.843	182.407	190.982	184.609	183.935	0.103213	7.53481	2.94059	0.0899319	0.864621
Apoltp	244.618	172.923	92.2599	161.346	188.363	88.7849	190.094	126.088	220.013	118.479	0.203953	7.65255	0.511285	0.476494	1
app	339.719	335.093	401.395	302.707	295.705	316.483	334.761	263.773	293.983	333.113	0.119715	8.19102	1.55472	0.215779	0.931876
APP-BP1	31.9501	29.9006	27.9007	34.0912	33.0281	23.4432	24.9266	21.9605	30.3467	28.6685	0.271625	4.86748	7.54641	0.00730509	0.423364
Appl	1001.44	992.611	858.122	1002.75	971.749	782.355	937.891	1004.76	952.97	1023.95	0.0376247	9.98094	0.150833	0.698687	1
Aprt	5.99064	10.4578	10.5507	10.2861	9.46118	10.2252	12.1138	8.63616	9.69408	11.1629	-0.135712	3.34876	0.60563	0.438545	1
Aps	113.573	124.316	101.404	120.495	112.33	97.2644	118.343	130.283	128.552	153.237	-0.134608	7.233	2.6331	0.108268	0.908739
apt	19.7192	21.7994	14.5365	20.2784	23.739	19.7023	20.0344	24.6747	17.4915	18.2666	-0.00511062	4.44823	0.0013316	0.970974	1
AQP	43.9314	55.2351	56.0359	32.9157	45.0696	72.8236	51.2509	46.1417	37.5119	44.6518	-0.101848	5.15248	0.284013	0.595439	1
aqrs	0	0.147293	0	0	0	0	0	0	0	0	1.2458	-1.27722	1.73983	0.293262	0.948688
ara	7.73791	6.62821	5.27534	8.5228	6.88086	6.2349	8.38651	6.90893	6.53296	7.10369	-0.0313692	3.05996	0.0271744	0.869446	1
aralar1	142.028	122.106	109.375	107.564	127.812	120.209	120.673	112.023	132.134	104.526	0.0455639	7.45101	0.165561	0.685085	1
Arc1	319.002	225.506	255.795	237.169	201.781	230.691	181.009	238.605	187.77	224.781	0.221048	7.63497	2.08745	0.152099	0.908739
Arc2	15.7254	6.03903	4.45473	5.58391	7.74097	6.2349	5.35805	8.38941	4.21482	6.59629	0.332288	2.67511	1.99269	0.161619	0.908739
Arc42	14.2278	22.6832	20.6324	17.6334	23.5669	18.2059	17.006	18.7528	19.1774	14.7148	0.180346	4.52978	1.37126	0.244786	0.948688
aret	65.1482	59.8012	68.345	57.6024	58.3153	57.8599	58.7055	49.5962	56.4785	60.1277	0.130491	6.1867	1.10511	0.296053	0.950283
Arf102F	72.6365	62.3051	114.651	74.9419	77.4097	107.739	95.9789	68.8425	80.9245	70.2758	-0.0717189	6.379	0.306221	0.581425	1
Arf51F	76.1311	81.306	94.8389	78.1747	83.4304	95.2692	87.3594	74.5177	83.0319	100.974	-0.0888872	6.51724	0.752483	0.388073	1
Arf79F	220.156	239.794	205.738	247.749	244.959	200.764	227.833	260.318	247.199	235.437	-0.0168866	7.93139	0.0494813	0.824489	1
ArfGAP1	40.9361	56.2661	30.9487	49.0796	52.4665	35.1648	37.0404	48.6092	49.7348	40.5925	0.117572	5.60212	0.975053	0.326156	0.97569
ArfGAP3	48.9236	45.5137	37.8652	49.3735	57.7992	37.16	42.8644	46.6352	50.9993	47.1888	0.0861945	5.65245	0.754327	0.434948	1
Arfip	36.6927	32.6992	28.6041	34.0912	32.6841	29.1793	30.0516	27.1422	36.0367	36.5333	0.0456797	5.17456	0.294919	0.848964	1
Arfrp1	9.48518	8.83761	13.3642	12.9312	11.8695	14.2156	13.2786	10.8569	14.9626	13.1926	-0.235927	3.69199	2.47346	0.119405	0.908739
arg	2.4961	3.38775	2.3446	3.82057	4.47256	1.49638	3.02846	2.46747	5.47926	1.52222	0.202943	1.98033	0.238629	0.626424	1
Argk	3145.84	3398.5	3161.1	3051.75	3244.32	3565.86	2770.58	3269.16	2508.66	2902.37	0.0916999	11.2158	0.826921	0.365672	1
ari-1	137.286	147.735	135.869	133.72	140.197	134.923	136.514	150.516	131.081	152.476	-0.021289	7.13816	0.100921	0.751487	1
ari-2	57.4103	56.5607	56.8565	53.7818	61.5837	47.3852	50.0861	58.7259	53.9496	60.1277	0.0838582	5.7276	1.14673	0.287191	0.948688
Ark	91.8565	82.6316	110.079	79.0564	81.0221	103.001	113.684	80.1929	78.3956	108.078	-0.117019	6.31363	1.79562	0.183726	0.908739
Arl1	18.2215	21.9467	20.7497	17.0456	22.3628	20.6999	17.9378	20.9735	22.9707	21.3111	-0.0416211	4.3596	0.130197	0.848775	1
Arl2	11.4821	12.6672	11.4885	12.0495	13.9337	10.9734	13.9775	11.5971	10.9585	12.4315	0.0418578	3.56968	0.0758919	0.783596	1
Arl4	71.3885	77.0345	118.05	61.1291	69.8407	124.199	111.587	67.1153	101.577	110.361	-0.364739	6.69425	6.23597	0.0143972	0.539933
Arl6	1.49766	1.91482	0.703379	1.46945	0.344043	0.997584	0.931834	1.48048	1.0537	1.52222	-0.0461397	0.782274	0.00921497	0.923745	1
arm	596.319	546.753	650.625	582.784	569.735	618.502	594.976	523.351	556.777	576.921	0.0376473	9.01024	0.443293	0.507295	1
armi	9.73479	7.95385	9.0267	8.5228	10.8374	6.73369	7.22171	11.1036	12.0122	9.13332	-0.00861391	3.43322	0.00130172	0.971302	1
Arp1	97.3479	101.927	95.894	95.8081	107.857	86.7898	85.9617	93.764	92.3045	89.811	0.153471	6.47141	5.18371	0.0252483	0.652248
Arp10	29.2044	31.8154	26.2595	29.389	31.824	27.9323	20.0344	27.1422	27.1856	25.8777	0.211726	4.72694	3.00068	0.0867662	0.854337
Arp2	79.8752	70.1117	71.5102	77.293	68.4645	57.1117	77.1093	70.8165	73.97	66.4703	0.0851515	6.16738	1.38766	0.242007	0.948688
Arp3	42.4337	39.6219	40.6787	35.8546	39.737	32.9203	38.9041	35.2849	39.1978	43.3833	0.065608	5.28579	0.638931	0.426271	1
Arp5	15.4758	16.4969	8.08886	19.6906	18.0623	9.47704	11.8809	18.0126	13.9089	14.7148	0.172201	4.0509	0.993964	0.379269	1
Arp53D	0	0	0	0	0	0	0	0	0.210741	0	-1.51453	-1.19604	2.11022	0.19043	0.908739
Arp6	15.975	15.1712	16.4122	19.1028	20.4706	13.9662	16.0741	16.7788	18.3344	13.7	0.136925	4.17904	1.11824	0.293219	0.948688
Arp8	8.23713	7.36467	8.08886	6.46558	5.50469	3.74094	6.52284	5.42844	5.69	6.08888	0.377044	3.01342	4.13846	0.0449584	0.768936
Arpc1	107.083	107.082	74.5582	104.625	118.351	65.0923	87.5924	105.855	94.2011	88.5425	0.210926	6.56573	3.77866	0.0551358	0.804465
Arpc2	32.4493	42.7151	37.6308	40.2629	36.4685	38.407	41.6996	39.4796	45.0985	49.2185	-0.173046	5.46517	1.55496	0.215745	0.931876
Arpc3A	18.2215	14.5821	17.1156	15.2823	21.3307	15.7119	14.2105	15.5451	13.2767	15.2222	0.229215	4.00816	3.56457	0.0623514	0.804465
Arpc3B	1.74727	1.47293	2.11014	0.58778	0.860107	0.997584	2.32958	1.48048	1.0537	1.77592	-0.114569	0.919506	0.077296	0.888527	1
Arpc4	27.9563	29.606	23.5632	34.679	33.0281	28.4311	24.9266	29.8564	28.45	22.0722	0.146447	4.74355	1.19099	0.278138	0.948688
Arpc5	18.7208	20.7684	13.1297	22.0417	17.3742	10.2252	17.006	21.2203	15.8056	17.7592	0.153137	4.16825	1.18642	0.287339	0.948688
arr	60.4056	55.5296	65.7659	49.6674	53.4987	60.8526	72.6831	56.9986	55.8463	57.0833	-0.0879546	5.78432	0.987723	0.32305	0.973107
Arr1	6343.84	6944	6060.31	7086.27	7394.17	5128.58	5096.9	5698.63	5465.56	5301.13	0.34189	12.5268	14.6883	0.000238848	0.0713283
Arr2	10021.1	10793.2	8557.31	11544	10982.4	8206.87	8652.31	9577.74	9010.85	9158.18	0.218422	13.0717	5.81331	0.0180049	0.601133
Ars2	124.056	136.099	116.409	132.544	141.746	110.233	115.547	136.451	135.296	131.926	0.0477869	7.07035	0.384581	0.53678	1
Art1	19.7192	17.086	14.6537	21.7478	17.7182	13.9662	16.5401	21.2203	19.3882	15.9833	0.044959	4.50151	0.0818676	0.949663	1
Art2	2.24649	1.17835	1.28953	1.46945	1.20415	1.24698	1.63071	1.48048	1.68593	1.26852	-0.0233525	0.830367	0.00475927	0.945158	1
Art3	7.98752	7.07009	6.33041	10.2861	8.60107	6.73369	8.38651	9.3764	10.9585	7.3574	-0.118937	3.50627	0.390287	0.533781	1
Art4	22.9641	19.1482	26.6112	17.3395	24.9431	22.4456	25.1595	20.9735	18.1237	21.8185	0.0434994	4.58906	0.108677	0.742446	1
Art6	0	0	0	0	0	0	0	0	0	0	0	-1.30545	0	1	1
Art7	10.4836	8.83761	6.09595	11.4617	11.0094	7.48188	6.98875	9.86989	9.27259	9.38702	0.128215	3.53121	0.537442	0.637017	1
Art8	1.24805	2.94587	3.86858	1.76334	2.75234	3.24215	3.02846	2.71422	2.52889	2.28333	-0.0615957	1.92242	0.0487149	0.922664	1
Art9	0	0	0	0	0	0	0	0	0	0	0	-1.30545	0	1	1
aru	49.922	67.4604	36.4585	72.2969	64.8521	44.3925	49.3872	67.1153	52.053	46.4277	0.159683	5.76068	1.64375	0.20321	0.915303
arx	2.99532	3.68234	3.86858	1.46945	3.44043	3.99033	3.26142	3.70121	3.79333	2.28333	-0.0909953	2.207	0.119675	0.859692	1
ARY	0	0	0	0	0	0	0	0	0	0	0	-1.30545	0	1	1
Asap	152.262	148.325	136.807	141.949	143.294	144.4	155.15	155.451	161.427	167.952	-0.118656	7.20559	2.96774	0.0884863	0.86003
Asator	595.07	563.25	794.115	534.292	502.991	727.238	708.893	565.545	617.049	729.397	-0.162716	9.23876	2.9084	0.09168	0.871833
Asciz	8.98596	8.69031	7.8544	9.11058	7.91299	9.47704	8.38651	8.8829	8.64037	6.34258	0.0192649	3.11856	0.0103827	0.990919	1
ase	0	0	0	0	0	0.498792	0	0	0.210741	0	-2.72936	-1.14381	4.57334	0.037681	0.728237
asf1	12.4805	12.5199	12.5436	17.0456	16.6861	15.2132	16.3071	12.5841	13.0659	12.9389	0.0143455	3.97402	0.00842271	0.927087	1
ash1	89.61	86.0194	67.8761	79.0564	80.506	65.3417	86.4276	86.8551	88.9326	84.7369	-0.034975	6.21808	0.158345	0.691658	1
ash2	30.9517	33.8775	32.4727	32.9157	34.4043	34.4166	27.955	31.0902	30.7682	32.9814	0.0682808	5.04346	0.58594	0.446061	1
asl	4.24337	2.79858	1.52399	3.23279	3.09639	1.24698	0.931834	3.45446	3.16111	4.82036	0.0809181	2.14875	0.0463405	0.830061	1
asp	0.49922	0.736467	0.23446	0.58778	0.516064	0.748188	0.465917	0.493495	0.210741	0.76111	-0.0764253	1.92596	0.0053234	0.942004	1
asparagine-synthetase	70.39	73.6467	76.4338	73.7663	74.4853	70.0803	76.6433	77.4787	83.6641	69.261	-0.0323943	6.30438	0.128809	0.720538	1
Asph	130.546	157.604	117.464	121.67	125.92	157.618	123.701	147.802	105.16	116.704	0.00624623	7.07952	0.00290658	0.957128	1
ASPP	64.649	74.2359	50.8777	64.6558	82.5703	53.1213	58.2396	70.8165	60.9041	63.6795	0.135091	6.11922	1.50096	0.223823	0.941386
asrij	22.7145	20.9157	21.6875	20.8662	25.6312	23.6926	20.0344	19.2463	22.5493	18.0129	0.110679	4.47681	0.808328	0.371092	1
ast	9.9844	8.83761	7.03379	9.11058	8.08501	7.23248	10.949	9.62315	10.3263	6.84999	-0.0821992	3.27704	0.2615	0.610384	1
AstA	53.9158	51.2581	68.4622	51.4307	54.3588	74.5694	72.6831	63.4141	63.8545	71.798	-0.304977	5.89274	9.8273	0.00234341	0.279987
AstA-R1	10.7332	12.2254	17.4672	9.11058	11.3534	20.2011	16.5401	11.5971	11.38	13.4463	-0.234042	3.91524	1.53837	0.218189	0.935497
AstA-R2	1.49766	0.883761	2.93075	0.29389	1.72021	0.498792	0.698875	0.986989	2.10741	0.507407	0.650753	0.916377	1.87438	0.174491	0.908739
AstC	132.543	121.517	147.944	107.564	117.835	174.827	146.997	127.322	123.283	151.715	-0.204372	6.88144	4.64452	0.0339096	0.704179
AstCC	0.74883	1.32564	0.820609	0.881669	1.37617	0.997584	1.63071	1.72723	0.842963	1.26852	-0.296898	0.365133	0.385033	0.536541	1
AstC-R1	90.3589	72.3211	102.342	79.938	86.5268	97.7632	94.5811	65.388	88.0896	96.4073	-0.0340959	5.60065	0.0956516	0.762028	1
AstC-R2	17.4727	15.3185	20.0463	17.3395	14.1058	17.9565	20.7333	11.8439	14.3304	17.2518	0.0393465	4.10071	0.0757274	0.783824	1
asun	10.234	8.69031	8.08886	8.5228	9.46118	7.73127	13.2786	8.63616	10.1156	12.4315	-0.220187	3.42913	2.78719	0.0986082	0.891578
Asx	90.3589	77.771	70.6896	73.4725	75.3454	77.8115	77.1093	89.3225	76.2882	74.0814	-0.0271893	6.38856	0.0854385	0.770753	1
Atac1	6.24025	6.62821	3.86858	5.58391	5.50469	4.98792	5.12509	10.1166	5.90074	5.32777	-0.187845	2.59425	1.07961	0.301659	0.955834
Atac2	12.9797	9.1322	12.8953	11.7556	13.0736	10.724	10.4831	11.3504	11.5907	10.9092	0.116835	3.47627	0.783213	0.378595	1
Atac3	12.9797	15.1712	13.0125	12.9312	16.17	11.4722	16.5401	17.7658	13.9089	16.9981	-0.120246	3.95047	0.808876	0.37093	1
ATbp	7.73791	7.80655	6.56487	9.99225	6.70884	8.47946	5.35805	8.63616	6.7437	9.64073	-0.0172518	3.09212	0.0089996	0.924639	1
Ate1	58.6584	62.3051	64.0075	68.4763	68.4645	73.073	66.6261	67.1153	64.6974	60.8888	-0.0464363	5.8801	0.263015	0.609354	1
Atet	142.028	129.618	156.502	128.724	129.188	123.451	146.531	142.373	146.676	125.329	0.00415349	7.07133	0.00307588	0.955898	1
Atf-2	13.7286	13.551	11.8402	16.1639	14.4498	17.2083	13.9775	17.5191	13.4874	10.9092	-0.0778558	3.85457	0.288944	0.592268	1
Atf3	67.6443	71.29	86.9845	56.4268	62.0997	92.7753	88.9901	79.2059	82.3996	90.8258	-0.327768	6.17719	10.3677	0.00180239	0.244368
Atf6	63.6506	67.3131	115.471	51.7246	57.9712	105.993	99.7062	64.6478	95.4656	134.209	-0.477702	6.76548	6.34388	0.0136037	0.530866
Atg1	146.272	145.379	130.125	125.785	131.252	129.935	142.804	132.75	131.713	147.148	-0.0114315	7.17093	0.0341726	0.85377	1
Atg10	0.99844	1.62023	2.46183	2.9389	1.03213	2.74336	1.86367	2.96097	2.31815	1.77592	-0.366124	1.76524	1.17841	0.280672	0.948688
Atg101	81.1233	70.4063	69.0484	71.7091	69.6687	74.8188	73.6149	68.8425	73.7593	68.7536	0.00674241	6.32034	0.00960973	0.922134	1
Atg12	16.2247	17.5279	20.1635	18.8089	15.826	21.448	17.006	16.2853	14.1196	16.4907	0.0578874	3.91794	0.200713	0.655257	1
Atg13	24.961	31.6681	37.3963	32.6218	27.6955	32.1721	36.1086	31.3369	38.1441	31.4592	-0.128359	5.16599	1.38955	0.241688	0.948688
Atg14	32.1997	36.0869	24.501	33.2095	33.0281	28.1817	34.4779	33.3109	35.4044	35.0111	-0.0703749	5.30432	0.451359	0.503467	1
Atg16	17.9719	20.9157	16.7639	20.5723	18.9224	17.7071	21.4322	18.0126	20.0204	14.9685	0.0406105	4.42293	0.148998	0.821526	1
Atg17	125.055	121.959	106.796	119.613	121.103	105.993	134.65	117.452	121.808	137.254	-0.0548587	6.9428	0.551819	0.459573	1
Atg18a	87.1139	86.314	101.755	75.8236	84.6346	101.754	94.5811	89.3225	88.5111	89.0499	-0.0852673	6.4414	1.47196	0.260676	0.948688
Atg18b	73.8846	62.0106	66.5865	68.7702	58.4873	66.3393	73.149	63.4141	57.5322	74.8425	-0.0257015	5.92619	0.0804097	0.777415	1
Atg2	99.844	104.726	90.8531	96.3959	91.8595	85.7922	92.7175	102.153	97.1515	101.228	0.0135045	6.53181	0.0312024	0.86704	1
Atg3	32.1997	34.7613	27.6662	36.7362	34.9204	24.4408	25.3925	39.9731	34.983	26.6389	0.128865	5.16952	1.10383	0.296331	0.950293
Atg4a	50.6708	54.6459	42.4372	55.5452	56.251	45.8888	49.1542	55.2714	59.6396	46.6814	0.0121031	5.82993	0.0112035	0.915947	1
Atg4b	43.6818	44.188	54.6291	45.8468	43.0054	48.1334	48.6883	43.4275	39.83	46.174	0.0357908	5.39688	0.190428	0.66364	1
Atg5	17.7223	17.9698	24.501	15.5762	18.7503	23.4432	22.8299	18.2593	18.5452	19.5352	-0.103911	4.23398	0.867584	0.574995	1
Atg6	27.9563	30.9316	30.3625	33.2095	32.34	27.1842	30.0516	34.5446	27.8178	25.3703	0.0940272	4.79268	0.825235	0.366158	1
Atg7	14.2278	18.1171	22.2737	12.0495	18.2343	23.1938	16.5401	17.7658	13.4874	17.7592	-0.0369854	4.12857	0.0714881	0.789814	1
Atg8a	520.437	497.263	619.442	470.224	491.637	649.427	559.333	507.806	527.695	596.964	-0.128015	9.03773	2.03142	0.157648	0.908739
Atg8b	0	0	0.351689	0	0	0.498792	0	0.493495	0	0	-0.82408	-0.928699	0.596233	0.44244	1
Atg9	49.6724	53.9094	46.423	43.2018	40.7691	60.6032	45.6599	52.3104	52.4745	40.8462	-0.105047	5.47401	1.05994	0.306077	0.958542
atilla	122.559	146.262	161.777	140.185	152.755	159.613	116.246	144.347	139.3	133.702	0.0637267	6.80831	0.421107	0.518091	1
atk	0.74883	0.147293	0.468919	1.46945	2.06426	0	3.26142	0.986989	0.632222	0	-0.118284	1.81729	0.0147953	0.903467	1
atl	126.053	136.983	118.637	116.38	109.062	126.693	124.167	124.361	111.903	123.046	-0.00660023	6.94355	0.00759076	0.971726	1
atms	40.6864	39.9165	32.121	44.0835	38.7048	34.4166	32.1483	40.9601	37.7226	33.4888	0.122691	5.28974	1.28434	0.2602	0.948688
ato	0.74883	0.736467	0.468919	0.58778	0.688086	0.997584	0	0.493495	1.0537	0.253703	0.170443	-0.194208	0.0868853	0.786519	1
Atox1	60.9049	69.9644	56.7392	69.9458	67.9485	53.3707	55.91	67.1153	61.1148	56.5758	0.144636	6.13471	2.61921	0.10919	0.908739
ATP7	49.6724	43.4516	43.7267	36.4423	44.5536	39.1552	34.2449	46.6352	45.7307	39.324	0.088278	5.43623	0.8629	0.355493	0.996983
Atpalpha	5554.57	5291.52	6313.18	5143.66	5451.02	5428.6	5651.34	5152.82	5269.36	5515.76	0.0388067	12.1995	0.260538	0.611041	1
ATPCL	359.189	370.149	395.885	374.122	375.867	349.404	378.325	363.459	352.78	347.827	0.0658258	8.3503	1.00172	0.319664	0.970246
ATPsyn-b	590.078	690.217	544.298	558.978	599.839	658.655	485.718	607.245	522.216	488.633	0.111216	9.00558	1.0204	0.315219	0.966503
ATPsyn-beta	2894.73	3115.55	3902.82	2660.88	2741.68	3932.23	3093.22	3009.82	2724.88	2969.09	-0.0383002	11.3167	0.133866	0.715344	1
ATPsyn-Cf6	288.799	384.436	270.097	342.676	362.277	304.014	245.305	375.796	295.459	271.463	0.143721	8.10439	1.63606	0.204262	0.916219
ATPsyn-d	367.426	455.726	303.977	393.225	440.203	342.421	270.931	456.976	331.074	301.4	0.203327	8.43465	2.46144	0.120295	0.908739
ATPsyn-gamma	542.652	642.641	510.536	582.196	600.355	554.407	422.354	639.322	485.125	473.41	0.160979	8.91584	2.12934	0.148097	0.908739
AttA	62.6521	1.91482	3.51689	6.75947	1.89224	9.97584	15.6082	3.70121	14.9626	58.0981	-0.521599	4.78178	0.252048	0.616902	1
AttB	10.4836	1.03105	3.75135	4.70224	1.72021	4.48913	9.08538	1.23374	6.11148	16.237	-0.893597	4.39467	0.672735	0.414337	1
AttC	132.044	4.27151	0.351689	14.4006	3.26841	5.9855	16.3071	0.740242	10.7478	40.3388	0.977163	6.12878	0.588455	0.44509	1
AttD	86.3651	0.44188	1.40676	0	0	0	15.8412	0	8.64037	1.26852	1.72526	1.06325	4.1135	0.0455949	0.7694
att-ORFA	10.7332	16.9387	13.9503	12.0495	14.4498	17.9565	15.3753	15.7918	11.38	13.1926	-0.0959936	3.80582	0.44795	0.611504	1
att-ORFB	0	0	0	0	0	0	0	0	0	0	0	-1.30545	0	1	1
Atu	12.4805	20.9157	9.37839	17.0456	14.2778	9.97584	11.8809	17.0256	15.8056	10.6555	0.170915	4.09064	0.587928	0.445293	1
Atx-1	0.24961	0	0.11723	0.58778	0.172021	0.498792	0.232958	0	0.421482	0	-0.302122	-0.653065	0.118951	0.731006	1
Atx2	206.178	181.613	153.688	199.551	176.838	154.625	174.253	195.424	182.291	193.322	0.0266357	7.46295	0.104881	0.746825	1
Atxn7	30.9517	36.2342	28.7213	34.3851	33.2001	29.1793	25.1595	38.9861	37.9333	28.9222	0.0267428	4.9602	0.0537297	0.885635	1
aub	2.74571	3.38775	3.75135	3.23279	3.09639	2.99275	4.19325	2.96097	2.31815	1.77592	0.198588	2.02395	0.204948	0.651881	1
aur	1.49766	1.47293	1.28953	1.17556	1.37617	0.748188	1.39775	3.45446	2.73963	3.55185	-0.787502	1.65133	3.01488	0.0860361	0.851091
aust	0	0	0	0	0	0	0	0	0	0	0	-1.2841	0	1	1
aux	126.303	118.571	147.827	119.613	108.029	128.439	129.758	112.517	115.907	131.672	0.00612143	6.7132	0.00700632	0.933484	1
ave	8.73635	11.1943	11.0196	7.05336	10.1493	10.9734	10.4831	9.62315	8.00815	8.11851	0.0528096	3.37612	0.116625	0.733546	1
Aven	6.48986	9.27949	6.56487	8.22891	8.08501	6.2349	6.52284	7.89591	6.11148	6.59629	0.213307	2.89853	1.99346	0.17137	0.908739
awd	261.591	309.905	282.172	328.863	347.999	268.35	233.657	248.721	279.021	208.798	0.305068	8.05745	6.1598	0.0149864	0.549732
Awh	6.48986	5.15527	7.15102	7.34725	7.05288	4.73852	8.61946	3.94796	7.16519	9.38702	-0.0356146	2.63882	0.0316924	0.859118	1
Axn	85.3667	85.8721	80.7713	84.3464	82.3983	80.3055	88.0583	81.6734	81.7674	86.2591	0.00192183	6.35691	0.000891863	0.976244	1
axo	96.8487	73.794	85.695	76.4114	100.977	95.5186	119.042	102.4	114.432	92.6017	-0.273269	6.47757	6.76469	0.0109216	0.497781
Axs	40.4368	40.0638	47.0092	37.0301	35.4364	51.8744	32.3812	39.9731	41.0944	36.2796	-0.00727742	5.12823	0.00440155	0.947256	1
Axud1	42.6833	39.3274	38.2169	37.0301	36.8126	33.4191	40.0689	38.2458	33.7185	40.5925	0.0608648	5.5303	0.504249	0.479534	1
az2	10.4836	9.27949	7.15102	9.69836	11.8695	10.2252	8.38651	10.8569	9.90482	8.62591	0.00268103	3.5311	0.000314271	0.985897	1
b	23.2137	34.9086	23.6804	25.5684	32.6841	36.6612	26.3243	35.2849	20.0204	27.4	-0.0475402	5.05224	0.080492	0.777304	1
B4	190.453	177.047	201.753	158.701	152.583	186.798	187.998	180.619	198.939	193.068	-0.104793	7.49599	1.22315	0.271786	0.948688
B52	623.776	540.125	691.304	567.795	600.871	693.57	698.875	544.078	590.706	641.616	-0.0673396	9.13884	1.28343	0.260369	0.948688
b6	3.74415	3.53504	3.51689	3.23279	5.67671	4.98792	2.32958	5.42844	4.21482	3.04444	-0.0143723	1.48118	0.00244136	0.960706	1
bab1	14.2278	12.2254	17.5845	12.0495	10.3213	18.2059	12.5798	12.3374	14.9626	12.6852	-0.0825012	3.74809	0.275323	0.665839	1
bab2	44.181	41.5368	38.4514	43.4957	38.7048	42.6467	49.3872	43.4275	52.2637	44.6518	-0.175799	5.59599	3.11334	0.0811563	0.837928
babo	154.009	144.348	185.926	145.475	124.888	172.582	176.815	130.776	165.221	183.174	-0.13367	7.33847	2.02099	0.158706	0.908739
babos	26.9579	36.2342	33.0588	32.3279	38.5328	32.1721	29.8187	28.3759	33.297	25.3703	0.168769	5.25649	0.760256	0.385644	1
Bacc	405.117	405.352	405.967	366.187	397.37	429.21	432.371	418.977	457.729	505.377	-0.180069	9.05547	4.37196	0.0394457	0.737197
Bace	0.24961	0.44188	0.468919	0.58778	0.688086	0	0	0	0.210741	0	2.82624	2.47841	1.31985	0.253762	0.948688
baf	22.7145	27.6912	21.2186	26.1562	29.0716	20.2011	25.6254	27.8824	23.3922	20.2963	0.109983	4.7054	0.729576	0.395362	1
bai	66.3963	70.259	57.7943	72.003	71.905	69.8309	61.0351	69.5827	74.813	65.4555	-0.0125085	6.16706	0.0253216	0.873936	1
Baldspot	162.995	151.712	181.237	143.124	152.755	192.035	181.708	156.931	214.113	213.111	-0.273625	7.46264	7.86331	0.00621838	0.404541
ball	4.49298	6.92279	4.57196	5.29002	6.88086	4.48913	2.7955	7.64917	3.37185	2.02963	0.480561	2.8849	2.56088	0.113156	0.908739
bam	0	0	0	0	0.172021	0	0	0	0	0	1.26006	-0.288454	0.816328	0.369304	1
ban	0	0	0	0	0	0	0	0	0	0	0	-1.30545	0	1	1
bap	1.49766	1.03105	0.937839	1.76334	1.37617	1.99517	0.465917	0.246747	0.632222	0.76111	0.63946	0.41652	2.07575	0.153239	0.908739
Bap170	47.6755	39.1801	36.8102	37.9118	38.8768	35.1648	41.6996	41.4536	43.4126	33.9962	0.030024	5.34873	0.0615786	0.955324	1
Bap55	19.7192	20.3265	20.8669	15.5762	19.6104	16.9589	17.006	21.467	15.8056	16.237	0.145332	4.25141	1.20788	0.274777	0.948688
Bap60	38.9392	40.0638	35.9896	38.7935	43.3494	34.1672	28.188	39.9731	38.5656	37.8018	0.141211	5.28485	1.61885	0.206635	0.919984
barc	55.4134	59.212	45.9541	64.068	74.4853	49.131	53.3475	75.0112	56.6893	58.0981	0.030892	6.01279	0.0604306	0.806394	1
barr	4.9922	7.36467	4.92365	4.70224	7.39692	5.23731	5.35805	6.41543	8.85111	4.82036	-0.0546492	3.08627	0.0590872	0.808516	1
baz	60.156	65.9875	66.3521	61.423	62.4438	68.3345	75.0126	60.4531	67.8585	70.5295	-0.111447	6.09482	1.16852	0.282687	0.948688
bbc	200.936	187.799	217.11	199.257	214.167	233.933	208.032	203.813	202.1	216.155	-0.0615518	7.60362	1.84251	0.178161	0.908739
bbg	44.6802	61.2741	51.8156	53.4879	50.7463	38.407	48.4554	49.5962	49.7348	52.5166	0.136231	5.4857	1.5221	0.220618	0.937179
BBS1	0.49922	0.147293	0.937839	0.881669	0.860107	0.498792	0.698875	0.246747	0.632222	0	0.61463	-0.0614709	0.926011	0.338563	0.981656
BBS4	2.24649	1.91482	3.16521	2.05723	1.54819	3.99033	1.86367	3.20772	2.10741	3.80555	-0.417446	1.74943	1.66908	0.199796	0.912802
BBS8	0.99844	1.62023	1.05507	0.881669	0.860107	1.49638	1.63071	0.986989	0.842963	1.01481	-0.107075	0.889953	0.0577832	0.828228	1
bbx	0.74883	1.32564	1.87568	1.46945	0.860107	0.748188	0.698875	1.23374	0.842963	1.26852	0.418744	0.714966	0.711999	0.401091	1
bc10	42.9329	48.9014	51.9328	45.8468	44.0375	64.8429	47.7565	45.1548	48.2596	54.7999	-0.154435	5.60007	2.69866	0.104035	0.908739
BCAS2	6.48986	9.72137	5.62703	7.64114	8.94512	6.73369	3.02846	8.38941	6.7437	6.59629	0.289563	3.09326	1.78419	0.185113	0.908739
bcd	0	0.294587	0.11723	0.29389	0.172021	0	0	0	0	0	2.98834	0.552632	2.49783	0.119334	0.908739
bchs	269.829	247.895	257.554	214.833	197.481	213.234	262.544	205.047	234.765	260.553	0.0142581	7.68494	0.0203803	0.886809	1
BCL7-like	9.48518	10.1632	9.0267	7.93503	8.94512	8.47946	10.0172	8.8829	8.85111	11.4167	-0.0566947	3.44372	0.120553	0.741164	1
bcn92	18.7208	21.7994	14.8882	15.5762	21.3307	11.971	15.8412	21.2203	16.8593	17.5055	0.149572	4.39773	0.783906	0.378385	1
Bdbt	10.4836	17.6752	16.6466	15.5762	19.2664	9.47704	9.78426	18.0126	16.6485	12.4315	0.272389	3.87451	3.31748	0.0719769	0.810646
bdg	41.4353	38.0017	34.4656	38.2057	34.5763	37.4094	33.0801	30.3499	32.2433	27.6537	0.212012	5.03605	5.32271	0.0234192	0.635931
be	31.7005	38.8855	43.6095	30.8584	34.9204	36.6612	36.1086	33.8044	29.5037	33.9962	0.0918433	4.95624	0.958403	0.330299	0.976263
BEAF-32	25.2106	30.7843	21.4531	27.3318	29.9317	27.4336	25.1595	23.441	25.7104	25.1166	0.0849123	4.84448	0.601163	0.440233	1
beag	20.468	30.1952	15.7088	32.3279	27.3514	17.9565	19.1026	22.9475	18.3344	18.5203	0.369854	4.588	5.55307	0.0206897	0.621738
beat-Ia	32.4493	29.4587	31.1831	38.7935	34.7483	31.9227	31.4494	31.5837	29.293	34.25	0.0670565	4.98329	0.481833	0.547152	1
beat-Ib	70.39	76.0034	70.1034	67.0069	76.0335	75.0682	77.1093	76.2449	78.3956	86.2591	-0.127094	5.98237	2.01472	0.159346	0.908739
beat-Ic	33.6974	33.141	45.6024	31.1523	28.7276	34.9154	41.0007	35.2849	40.0407	44.9055	-0.17891	5.45845	1.88807	0.172942	0.908739
beat-IIa	126.053	102.811	135.4	97.8653	114.05	119.959	125.565	117.205	116.54	120.255	-0.0554931	6.81697	0.482799	0.489005	1
beat-IIb	38.6896	42.8624	38.9203	36.7362	38.5328	39.4046	39.8359	44.6613	38.1441	36.0259	-0.0145964	5.39418	0.0264796	0.95518	1
beat-IIIa	0	0	0	0	0	0	0	0	0	0	0	-1.30545	0	1	1
beat-IIIb	64.1498	57.5917	60.4906	60.8352	55.907	55.1165	59.1715	67.1153	57.3215	76.8721	-0.0785271	6.035	0.691549	0.40791	1
beat-IIIc	26.2091	27.2493	37.9825	29.0951	26.1473	29.4287	27.2561	23.441	28.2393	32.9814	0.0609779	5.17535	0.186939	0.666544	1
beat-IV	63.1514	59.0647	65.0625	63.4802	62.2718	67.3369	64.9954	64.4011	65.7511	71.5443	-0.0936539	5.96346	1.39153	0.241357	0.948688
beat-Va	42.4337	58.4755	96.2457	49.9613	44.3815	55.3659	70.5864	25.415	51.6315	71.5443	0.0985846	5.36573	0.211483	0.646753	1
beat-Vb	35.4446	34.9086	41.0304	26.1562	34.4043	45.1407	38.6711	36.0251	35.1937	36.0259	-0.1423	5.03845	1.71909	0.193254	0.910015
beat-Vc	24.961	27.102	24.0321	28.8012	27.1794	25.4384	21.8981	26.1552	26.7641	20.55	0.124576	4.52598	1.58598	0.211263	0.925643
beat-VI	52.1685	52.7311	53.574	52.6063	49.8862	49.6298	54.7452	49.5962	52.053	58.0981	-0.0170547	5.81618	0.0317295	0.859036	1
beat-VII	123.807	114.742	145.248	113.148	106.137	141.657	121.138	112.023	135.928	144.357	-0.117816	6.98033	1.32299	0.253202	0.948688
beg	12.9797	11.1943	8.79224	9.99225	12.7296	11.7216	7.68763	10.6101	8.00815	11.1629	0.177369	3.45298	1.46827	0.228893	0.947073
bel	179.47	163.201	158.26	169.868	177.87	151.383	175.185	169.515	160.374	170.235	0.0372284	7.42624	0.324895	0.570147	1
Bem46	17.9719	17.9698	27.0801	17.6334	19.0944	27.1842	20.2674	16.7788	21.7063	22.3259	-0.104498	4.35199	0.615518	0.575314	1
ben	161.248	152.596	189.795	157.231	145.53	153.129	151.656	138.179	156.791	161.102	0.0846445	7.50506	0.800803	0.373317	1
Best1	80.8737	70.9955	90.3842	79.0564	68.8086	105.494	90.1549	83.4006	88.7219	92.348	-0.237453	6.24789	9.9902	0.00216459	0.272234
Best2	61.6537	72.4684	87.219	75.2358	68.9806	60.8526	58.7055	63.6608	62.1685	58.0981	0.271083	6.0499	7.973	0.00588269	0.401554
Best3	0.24961	0.147293	0.11723	0	0	0	0	0.246747	0	0.507407	-0.383304	-0.900544	0.158232	0.709414	1
Best4	0	0	0	0	0	0.249396	0	0	0	0.253703	-2.26088	-1.08695	3.3219	0.0734162	0.810646
Bet1	14.2278	13.4037	14.302	14.1067	16.17	14.465	17.006	15.7918	12.223	10.6555	0.0424194	4.04185	0.0985746	0.754297	1
Bet3	22.9641	26.5128	22.1564	28.5073	28.0395	17.9565	22.8299	27.8824	26.9748	22.3259	0.114411	4.65212	0.980199	0.32489	0.975174
Bet5	13.7286	15.7604	17.9362	21.7478	18.4063	16.4601	17.4719	14.8048	18.9667	17.7592	0.0295792	4.09454	0.0633138	0.852612	1
beta3GalTII	8.23713	7.51197	9.14393	8.5228	8.08501	5.73611	6.05692	9.3764	7.37593	8.62591	0.16076	3.0068	1.01858	0.31565	0.967131
beta4GalNAcTA	26.9579	26.2182	35.8723	32.034	22.8789	36.6612	29.8187	25.1682	32.6648	33.7425	-0.133304	4.84703	1.08245	0.301028	0.95492
beta4GalNAcTB	14.4774	15.3185	13.5987	17.0456	17.8902	20.4505	13.7446	18.0126	14.9626	15.4759	-0.0800131	3.85381	0.397137	0.53022	1
beta4GalT7	2.74571	6.33362	6.33041	6.46558	9.11714	8.23007	5.591	6.41543	6.11148	3.04444	0.0947246	2.80728	0.205967	0.651075	1
betaCOP	103.339	107.672	82.5298	123.14	120.587	68.3345	91.3197	109.309	110.217	88.7962	0.19541	6.88592	2.67146	0.105769	0.908739
beta'COP	63.6506	70.8482	61.7801	71.1213	73.4532	60.3538	67.325	71.8035	85.7715	70.5295	-0.063559	6.02063	0.658963	0.419137	1
betaggt-I	24.961	20.1792	28.3696	14.9884	21.5027	24.6902	22.597	19.2463	26.3426	14.4611	0.0447446	4.45584	0.120058	0.729806	1
betaggt-II	38.6896	40.8003	40.4443	37.324	44.2095	43.1455	28.188	36.5186	37.3011	33.4888	0.176308	5.11844	2.36949	0.127349	0.908739
betaNACtes1	0	0	0	0	0.172021	0	0	0	0	0	1.26145	-1.28433	1.52235	0.293262	0.948688
betaNACtes2	0	0	0	0.29389	0	0	0	0	0	0	1.30349	-1.27608	1.41042	0.293262	0.948688
betaNACtes3	0.24961	0	0	0	0	0	0	0	0	0.253703	-0.239938	-1.23441	0.0508117	0.829654	1
betaNACtes4	0	0	0	0	0	0.249396	0	0	0	0	-1.53058	-1.20276	2.00583	0.19043	0.908739
betaNACtes6	0	0	0	0	0	0	0	0	0	0.253703	-1.53214	-1.24289	2.11478	0.19043	0.908739
beta-Spec	846.428	961.679	575.129	922.226	925.475	521.237	709.825	891.251	768.15	741.068	0.220018	9.46634	2.78118	0.0989662	0.89349
betaTry	0	0	0	0	0	0	0	0	0	0	0	3.85975	0	1	1
betaTub56D	583.588	688.302	591.424	647.145	681.893	506.274	486.417	541.857	502.827	493.707	0.334917	8.82155	12.9229	0.00053712	0.128349
betaTub60D	11.4821	10.6051	15.5916	14.9884	11.8695	8.23007	20.9663	12.3374	37.0904	14.4611	-0.540757	3.9412	6.40295	0.0131889	0.527416
betaTub85D	1.49766	1.62023	1.1723	1.76334	1.37617	0.997584	0.931834	1.23374	0.632222	2.02963	0.340338	0.635646	0.551305	0.459781	1
betaTub97EF	132.793	148.914	130.711	144.006	152.583	117.216	109.723	134.971	126.234	106.555	0.2534	6.86197	8.652	0.00418374	0.353038
bft	0	0	0	0	0	0	0	0	0	0	0	-1.30545	0	1	1
BG642163	0	0	0	0	0	0	0	0	0	0	0	-1.2267	0	1	1
BG642167	0	0	0	0	0	0	0	0	0	0	0	-1.27612	0	1	1
BG642312	0	0	0	0	0	0	0.232958	0	0.210741	0	-2.23899	-1.02147	3.34172	0.0715113	0.810646
Bgb	40.9361	42.5678	40.0926	38.2057	46.2738	35.1648	37.0404	37.9991	37.9333	34.7574	0.187485	5.29782	3.32946	0.0714748	0.810646
bgcn	0.24961	0.294587	0.468919	0	0.516064	0	0	0	0.632222	0.76111	0.22828	-0.497191	0.0735395	0.786892	1
bgm	29.7036	77.4764	28.9558	59.0719	45.4137	31.1745	63.1318	45.6483	73.3378	36.0259	-0.056974	6.37912	0.027482	0.868716	1
B-H1	6.24025	5.30257	8.08886	7.05336	6.02075	7.73127	7.92059	7.40242	6.11148	6.34258	-0.113806	2.92583	0.330351	0.566933	1
B-H2	3.24493	4.86068	3.16521	4.99613	2.75234	3.49154	2.56254	8.38941	5.26852	3.29814	-0.290253	2.35437	1.1648	0.28345	0.948688
BHD	9.9844	12.9618	7.8544	9.99225	8.25703	8.47946	4.89213	11.1036	9.90482	7.10369	0.236515	3.3402	2.19303	0.142242	0.908739
bi	39.1888	29.4587	42.4372	29.0951	28.5556	34.1672	33.779	30.8434	36.0367	31.2055	0.0263156	5.11025	0.0639798	0.800908	1
BI-1	167.239	156.131	243.135	158.994	163.076	228.197	196.384	159.399	184.609	184.696	-0.0990611	7.31523	1.04531	0.309419	0.962661
bib	19.4696	14.8766	14.0676	15.2823	15.1379	17.4577	14.6764	11.5971	15.3841	17.2518	0.0385122	3.64004	0.0676309	0.910976	1
bic	274.321	305.339	263.064	318.577	332.689	255.381	264.874	294.123	308.735	279.074	0.0910491	8.25718	1.2167	0.273046	0.948688
BicC	0	0	0	0	0	0	0	0	0	0	0	-1.30545	0	1	1
BicD	118.814	116.362	110.782	117.262	120.759	105.744	116.945	127.568	129.606	141.313	-0.0895531	7.00318	1.21003	0.274355	0.948688
bif	426.334	421.554	369.743	428.491	378.963	385.566	418.16	465.612	433.283	451.846	-0.0897634	8.64232	1.00132	0.319762	0.970365
BigH1	0	0.589174	0.23446	0.881669	0	0.249396	0.232958	0.740242	0	0.253703	0.138152	2.04073	0.00974356	0.921618	1
bigmax	23.713	23.7142	11.1368	25.5684	20.8146	19.7023	14.6764	20.9735	17.2807	13.1926	0.270478	4.43549	2.67024	0.105847	0.908739
Bili	109.329	97.2137	124.264	100.804	92.2035	114.972	111.354	95.9847	99.0482	110.107	-0.0196237	6.60801	0.0515465	0.910803	1
bin	0.74883	0.44188	0.23446	0.29389	0.516064	0.249396	0.232958	0.740242	0	0.507407	0.342832	-0.794691	0.176414	0.675671	1
Bin1	18.2215	7.65926	6.33041	8.81669	11.1814	7.48188	9.08538	8.38941	6.53296	9.38702	0.324436	3.2448	2.39501	0.125346	0.908739
bin3	107.832	97.361	110.665	88.1669	94.4398	111.231	108.326	94.5042	101.577	103.004	-0.0557362	6.65091	0.507876	0.477963	1
bip1	10.4836	11.7835	7.50271	6.17169	9.80522	7.48188	10.949	8.14266	9.69408	8.37221	0.0419251	3.41816	0.0560219	0.813453	1
bip2	245.866	244.507	335.981	202.196	198.169	331.447	325.21	243.54	287.029	312.816	-0.288152	8.04774	7.32278	0.00818984	0.439671
Bka	6.24025	8.39573	4.10304	4.40835	7.74097	6.48429	3.49438	5.92194	8.00815	7.3574	-0.00943971	3.01989	0.00267761	0.95885	1
bl	135.788	142.433	112.423	143.418	148.971	107.739	132.32	160.386	130.238	133.955	0.0381914	7.15134	0.292658	0.739929	1
blanks	0	0.294587	0.11723	0.29389	0	0.249396	0.465917	0.246747	0	0	-0.387807	-0.916321	0.166545	0.684302	1
Blimp-1	107.332	94.7097	107.617	88.1669	91.6874	100.008	107.394	101.907	99.8911	108.331	-0.079123	6.64918	0.22827	0.634006	1
Blm	6.48986	8.69031	7.61994	9.11058	10.3213	8.97825	9.78426	7.15567	8.85111	10.1481	-0.0871194	3.42503	0.215973	0.643285	1
Blos1	12.2309	16.2023	12.8953	16.7517	16.5141	13.9662	13.2786	15.5451	9.69408	16.237	0.120536	3.93662	0.570081	0.452262	1
Blos2	9.9844	8.69031	8.90947	9.11058	12.5576	8.47946	10.4831	10.6101	7.58667	7.6111	0.137279	3.20724	0.691218	0.408022	1
Blos3	5.74103	8.83761	8.20609	7.34725	8.08501	12.9686	5.82396	9.3764	8.00815	8.37221	-0.201047	3.03186	1.32107	0.253544	0.948688
Blos4	8.73635	7.07009	6.79933	6.17169	7.39692	8.97825	8.85242	7.40242	7.16519	7.6111	-0.145867	2.98113	0.623068	0.432051	1
blot	68.3932	68.3442	81.8264	70.5336	62.4438	79.3079	74.3138	65.1413	69.9659	74.5888	-0.0457304	6.06118	0.259557	0.642949	1
blow	24.4618	29.3114	22.8598	32.9157	32.34	20.4505	15.8412	25.1682	23.8137	19.0278	0.438006	4.45103	10.4559	0.00172723	0.23862
blp	13.9782	22.5359	15.2399	17.3395	21.8467	16.9589	16.773	21.2203	16.8593	18.2666	0.0214374	4.31232	0.0307007	0.861316	1
blue	62.4025	64.8091	67.9933	68.7702	69.3246	56.3635	65.6943	63.9076	56.4785	67.4851	0.105539	5.86849	1.29662	0.257951	0.948688
blw	2730.73	2810.51	2956.89	2531.27	2653.78	2903.22	2318.17	2811.19	2233.01	2393.69	0.112286	11.0881	1.16886	0.282616	0.948688
BM-40-SPARC	182.465	225.359	160.722	212.482	252.7	118.463	149.326	175.437	186.084	119.748	0.463573	7.43917	7.56242	0.00724571	0.423364
Bmcp	17.7223	19.8846	21.922	21.7478	16.8581	26.436	17.9378	18.506	21.0741	16.4907	-0.0327398	4.73414	0.0767695	0.810827	1
bmm	84.1186	98.5393	77.8406	93.457	73.2811	95.0198	95.0471	77.9722	78.1848	89.3036	-0.028784	6.41391	0.023785	0.87779	1
bnb	302.278	327.433	207.966	364.129	384.124	241.665	255.555	365.186	279.442	276.537	0.159923	8.4295	1.967	0.164317	0.908739
bnk	0.24961	0	0	0	0	0	0	0	0.210741	0	-0.222006	-1.26169	0.0354771	0.851999	1
bnl	11.4821	13.2564	13.247	11.7556	13.7617	14.9638	16.0741	11.5971	11.5907	16.9981	-0.155607	3.43006	0.696703	0.406175	1
BobA	0	0	0	0	0	0	0	0	0	0	0	-1.20567	0	1	1
boca	15.2262	19.0009	12.4264	16.7517	24.7711	10.9734	16.0741	21.7138	16.8593	14.9685	0.128327	4.29884	0.65256	0.421398	1
bocksbeutel	31.7005	27.102	34.2311	32.034	28.7276	30.1769	28.4209	34.7914	30.9789	30.6981	-0.0124559	4.56679	0.0121575	0.912456	1
boi	4.49298	7.36467	8.67501	9.40447	8.94512	8.72886	7.68763	6.41543	7.79741	7.10369	0.0494533	2.98297	0.0549903	0.815147	1
bol	234.633	225.948	272.442	210.719	201.265	229.195	249.964	196.904	249.939	280.596	-0.0747009	8.06304	0.317453	0.574589	1
boly	0	0	0	0	0	0	0	0	0	0	0	-1.30545	0	1	1
bon	111.326	105.168	125.319	107.27	108.029	127.441	119.275	113.504	120.122	124.315	-0.117027	6.74921	2.53697	0.114827	0.908739
bond	67.6443	60.9795	90.3842	82.8769	66.9163	70.3296	62.4329	70.8165	63.8545	50.7407	0.212845	6.07824	2.5361	0.114889	0.908739
bonsai	16.2247	24.3034	17.7017	26.1562	26.3193	18.2059	15.1423	25.415	20.2311	16.7444	0.206127	4.41122	2.11893	0.14908	0.908739
bor	33.4478	35.3504	26.3767	39.969	39.737	39.654	38.9041	42.4405	44.2556	32.474	-0.185465	5.64378	3.08291	0.0826313	0.844849
bora	0.24961	0.147293	0.11723	0.29389	0	0	0	0	0	0	2.73213	0.472976	2.19254	0.143356	0.908739
borr	0	0.589174	0.23446	0.29389	0.172021	0	0.465917	0	0.210741	0.507407	0.198876	0.964198	0.0282906	0.866836	1
boss	394.634	392.832	477.594	399.69	410.787	428.462	400.922	390.108	394.507	392.986	0.0489066	8.30133	0.358279	0.551016	1
botv	30.9517	25.0399	27.7835	20.2784	26.3193	27.4336	23.2958	24.9215	28.0285	20.0426	0.0779876	4.61883	0.671271	0.414843	1
bou	7.98752	11.3416	9.26116	9.11058	12.7296	10.4746	10.0172	10.3634	8.42963	7.3574	0.124209	3.57403	0.600557	0.440463	1
bowl	21.4665	21.3576	23.5632	15.8701	17.3742	18.2059	20.0344	18.506	18.7559	23.087	0.0259968	4.43265	0.0356732	0.850631	1
BoYb	0	0	0	0	0	0	0	0.246747	0	0	-1.52825	0.233314	1.11197	0.295032	0.949192
br	58.6584	52.4365	54.0429	53.7818	49.0261	49.131	50.552	47.3755	53.5282	54.5462	0.0690529	5.52028	0.367759	0.545804	1
Br140	32.4493	37.4125	22.8598	27.6256	33.0281	22.1962	29.1198	25.9085	29.293	26.6389	0.20154	4.95266	2.46597	0.119959	0.908739
brat	84.8674	77.0345	114.768	65.8313	60.2075	93.7729	94.5811	67.1153	88.0896	101.989	-0.140201	6.66327	0.906103	0.343782	0.986186
Brca2	15.975	14.4348	14.1848	14.4006	15.654	17.2083	17.2389	15.2983	18.7559	18.774	-0.227951	4.1639	2.97904	0.0878919	0.858087
Brd	0	0	0	0	0	0	0	0	0	0	0	-1.18369	0	1	1
Brd8	9.23557	9.57408	6.56487	13.225	12.5576	4.48913	7.22171	14.8048	14.5411	8.11851	0.0260695	3.54538	0.0144972	0.90444	1
Bre1	33.947	47.2812	19.8118	47.0224	44.7256	18.4553	33.3131	56.0116	31.4004	41.6074	0.0846848	5.48894	0.200585	0.65536	1
Brf	35.195	31.6681	30.1281	40.5568	30.7918	25.9372	32.1483	32.8174	29.9252	28.9222	0.159473	5.07354	2.72979	0.106546	0.908739
brk	9.48518	9.72137	7.73717	6.75947	7.74097	4.48913	7.68763	8.8829	9.90482	7.6111	0.102302	3.35116	0.322736	0.571429	1
brm	99.5944	100.307	73.7376	99.9225	112.158	68.8333	87.8254	106.842	86.8252	89.0499	0.142534	6.56348	1.556	0.215592	0.931646
Brms1	23.713	34.7613	17.5845	27.9195	28.3835	20.2011	21.6651	26.6487	20.4419	21.5648	0.257687	4.81379	3.74573	0.0561841	0.804465
brn	4.49298	5.59715	3.98581	3.52668	6.02075	3.99033	4.19325	2.96097	4.21482	2.53703	0.405481	2.31071	3.02285	0.0856296	0.850958
Bro	0	0	0	0	0	0	0	0	0	0	0	-1.25585	0	1	1
brp	762.559	784.19	670.906	706.217	700.987	580.344	676.977	744.93	708.721	735.74	0.0726438	9.50698	0.391689	0.533048	1
bru	67.8939	60.8322	68.9311	60.5413	61.5837	61.102	64.2965	52.5572	65.3296	67.4851	0.04171	5.90755	0.284102	0.595381	1
bru-2	45.1794	41.5368	56.9737	42.3201	40.081	51.625	53.1145	38.7393	42.9911	55.8147	-0.0948867	5.24611	0.583097	0.447163	1
bru-3	239.875	222.119	288.971	211.307	192.836	229.444	229.464	215.657	246.145	264.866	-0.0365378	8.05128	0.0717008	0.789509	1
Bruce	425.336	390.917	424.841	354.725	325.465	389.058	409.075	344.706	367.11	388.674	0.017348	8.57699	0.0371843	0.847539	1
brv1	0	0	0	0	0	0	0	0	0	0	0	-1.30545	0	1	1
brv2	0	0	0	0	0.172021	0	0.232958	0	0	0	-0.263124	-1.04019	0.0456024	0.831687	1
brv3	0	0.147293	0.11723	0	0.688086	0.249396	0.465917	0	0	0.253703	0.106082	-0.747445	0.0102768	0.919486	1
BRWD3	86.1155	98.8339	82.647	104.037	95.2999	71.0778	87.3594	96.2315	89.1433	101.228	0.0678467	6.40579	0.379194	0.539639	1
bs	22.9641	15.7604	20.7497	11.7556	15.654	20.4505	17.9378	15.7918	15.3841	17.2518	0.0102366	4.17514	0.00642825	0.936281	1
bsf	81.6225	95.2989	76.9028	81.9953	95.1279	64.0948	87.8254	100.179	93.1474	79.6629	0.0205177	6.82779	0.0542892	0.816307	1
Bsg	420.343	434.368	463.292	392.343	401.842	403.024	406.746	413.055	431.808	456.159	0.00136983	8.82922	0.000232542	0.987868	1
Bsg25A	0	0	0	0	0	0	0	0	0	0	0	-1.2771	0	1	1
Bsg25D	67.8939	72.763	46.7747	66.713	68.2925	49.131	58.4726	72.5437	63.0115	68.4999	0.045723	6.12482	0.155869	0.693953	1
bsh	6.48986	5.59715	5.74426	4.40835	5.67671	5.9855	3.72734	4.93495	4.00407	3.04444	0.369995	2.32454	3.04002	0.0847604	0.850507
bsk	177.972	178.225	236.921	186.326	178.386	219.468	218.282	179.385	189.667	235.437	-0.120391	7.49941	1.95297	0.165814	0.908739
bt	1131.98	1592.98	1363.38	898.127	909.821	1891.42	1460.18	1203.14	1109.34	1428.86	-0.266041	10.0845	2.60193	0.110348	0.908739
BTBD9	57.6599	59.212	46.0713	54.6635	49.3702	75.0682	49.1542	67.1153	50.1563	62.6647	-0.189023	5.62515	3.92093	0.0508423	0.804235
BtbVII	182.964	179.993	156.853	181.624	164.625	162.357	169.827	175.684	163.113	155.774	0.0659985	7.34398	0.891772	0.347608	0.991865
btd	0.99844	1.32564	1.1723	1.76334	0.860107	0.997584	1.16479	1.97398	0.842963	1.01481	0.0131846	0.789783	0.00103951	0.992018	1
Btd	0	0	0.468919	0.29389	0.516064	0	0	0.246747	0.421482	0	0.836786	-0.630858	0.794571	0.375175	1
Bteb2	0	0	0	0	0	0	0	0	0	0	0	-1.29099	0	1	1
BthD	0	0.147293	0.23446	0	0	0	0	0	0	0	2.32297	0.369734	1.87762	0.174292	0.908739
Btk29A	33.1981	33.7302	35.8723	27.6256	29.4157	23.6926	29.5857	35.0381	37.5119	35.5185	-0.00903435	5.25116	0.00755628	0.930929	1
btl	10.7332	11.9308	15.0054	13.225	12.5576	16.2107	11.6479	18.7528	14.9626	12.6852	-0.219294	3.50501	2.02653	0.158143	0.908739
btn	0	0	0	0	0	0	0	0	0	0	0	-1.26416	0	1	1
btsz	273.573	311.82	284.634	300.062	288.48	243.909	248.101	249.462	277.546	280.85	0.16618	7.99335	4.31619	0.0406933	0.744723
btv	2.4961	4.4188	4.68919	2.05723	2.4083	5.73611	4.42621	3.45446	3.58259	3.55185	-0.30245	2.29957	0.798334	0.374052	1
btz	50.6708	48.6068	40.4443	54.6635	46.4458	39.1552	41.6996	57.4921	48.8919	45.9203	0.0407922	5.59632	0.120246	0.971602	1
Bub1	25.4602	25.9237	20.7497	21.7478	26.1473	21.6974	21.8981	25.415	21.917	26.1314	0.0372204	4.68366	0.0930975	0.761003	1
Bub3	15.975	13.6983	18.0534	11.7556	18.2343	14.7144	15.1423	15.2983	16.8593	15.9833	0.00600666	4.11139	0.00172469	0.966969	1
BubR1	13.2293	6.7755	11.6058	4.99613	8.94512	5.23731	8.61946	12.8309	4.21482	8.62591	0.223425	3.15569	0.822171	0.367046	1
Buffy	23.2137	26.8074	28.8385	24.9806	25.2872	28.1817	28.8869	27.1422	30.7682	23.8481	-0.100618	4.19936	0.638206	0.426532	1
bun	616.787	539.094	558.952	532.234	539.287	546.925	608.255	578.622	594.078	648.212	-0.0951043	9.21542	1.7527	0.188999	0.908739
bur	91.3573	95.1516	83.5849	91.6936	90.9994	89.0343	103.201	93.5172	101.999	89.811	-0.0779521	6.51203	1.06788	0.304283	0.957283
Burs	0	0	0	0	0	0	0	0	0	0	0	-1.24941	0	1	1
bves	87.3635	82.4843	94.1355	76.1175	83.7744	92.0271	90.6209	77.2319	89.3541	104.779	-0.0968719	6.65787	1.15301	0.285884	0.948688
bw	32.1997	37.5598	43.6095	48.1979	45.9297	39.4046	28.188	36.7654	43.4126	35.5185	0.177769	5.4188	2.07813	0.153006	0.908739
bwa	72.1373	60.3903	78.3095	57.3085	60.0355	81.5525	84.7969	60.9466	62.59	78.1406	-0.162056	6.02223	2.4548	0.120789	0.908739
Bx	87.1139	69.9644	70.3379	76.9991	71.0449	68.5839	73.3819	68.1023	75.2345	80.9314	0.032838	6.40274	0.163381	0.916133	1
Bx42	33.947	40.653	22.5081	37.6179	34.4043	28.6805	26.0914	37.5056	31.8219	31.2055	0.116063	5.24679	0.694809	0.406812	1
bxd	0	0	0	0	0	0	0	0	0	0	0	-1.29076	0	1	1
by	132.293	161.876	135.987	149.884	137.273	163.853	161.673	157.918	147.308	168.966	-0.156562	7.03783	5.47908	0.0215278	0.627345
byn	0	0	0	0	0	0	0	0	0	0	0	-1.21322	0	1	1
bys	12.7301	14.4348	9.8473	12.6373	12.7296	9.47704	13.0457	14.3113	15.5948	13.1926	-0.0811744	3.85998	0.250292	0.61813	1
Bzd	31.2013	24.598	17.4672	29.6829	27.6955	26.9348	21.8981	26.6487	22.1278	21.0574	0.125607	4.29684	1.08509	0.495167	1
c11.1	126.802	101.485	104.686	90.2242	99.2564	88.5356	102.036	104.127	100.313	96.1536	0.088797	6.56386	1.22246	0.27192	0.948688
c12.1	23.9626	21.063	18.9912	16.1639	21.5027	20.6999	18.4037	21.467	24.8674	25.1166	-0.118808	4.51561	1.02056	0.315182	0.966503
c12.2	37.1919	43.157	32.121	42.9079	39.909	33.4191	30.7505	37.7523	36.8796	38.5629	0.135442	5.24462	1.10889	0.295233	0.949192
C15	1.24805	1.17835	1.64122	1.17556	2.06426	1.74577	0.465917	1.72723	2.52889	1.77592	-0.153723	1.10264	0.183369	0.66955	1
C1GalTA	55.1638	59.6539	55.5669	56.133	59.3474	59.1068	62.4329	56.2584	60.0611	64.1869	-0.0786276	5.83065	1.27371	0.262168	0.948688
c(2)M	0	0.294587	0.11723	0.58778	0.516064	0.249396	0.232958	0	0	0	1.37867	-0.302006	1.53758	0.21864	0.935497
c(3)G	7.73791	6.33362	7.38548	10.2861	7.91299	7.48188	7.92059	10.1166	11.8015	10.4018	-0.290165	3.28219	1.92663	0.168665	0.908739
C3G	199.438	174.395	185.106	179.861	160.668	191.536	198.947	176.178	181.026	206.768	-0.0859647	7.45446	1.37317	0.244461	0.948688
C901	0.99844	0.44188	0.586149	1.17556	0.860107	0.249396	0.465917	0.246747	0.632222	0	1.16438	0.409203	4.22039	0.0542297	0.804465
ca	126.802	132.859	149.702	123.434	125.576	140.161	146.997	123.62	124.548	135.224	-0.0247269	6.92349	0.0858677	0.770194	1
Ca-alpha1D	618.284	571.793	635.386	474.338	472.715	605.284	614.079	501.391	528.116	606.097	-0.0418707	9.11176	0.158462	0.69155	1
Ca-alpha1T	940.032	864.76	922.364	827.888	780.633	797.069	942.55	727.658	834.112	893.797	0.0475367	9.78961	0.168614	0.682354	1
Ca-beta	301.03	272.346	341.49	258.623	249.603	323.217	318.687	251.682	275.438	318.144	-0.0627539	8.16195	0.394742	0.53146	1
CaBP1	46.6771	45.661	44.3129	43.4957	61.5837	41.6491	55.2112	44.4145	50.9993	50.9944	-0.00829018	5.5527	0.00368925	0.951706	1
cac	414.602	420.081	487.559	403.805	369.674	412.251	446.814	402.938	438.973	495.483	-0.0673228	8.93491	0.418368	0.519452	1
cact	176.474	160.55	105.155	156.349	140.886	124.449	136.514	152.983	137.614	136.746	0.100489	7.15203	1.18995	0.278345	0.948688
cactin	13.7286	16.2023	4.22027	14.6945	14.6218	5.9855	7.22171	16.2853	14.5411	11.6704	0.158626	3.95013	0.405058	0.526156	1
cad	1.74727	1.03105	1.05507	2.05723	0.172021	0.997584	0.698875	1.48048	1.26444	0.253703	0.248926	1.36677	0.141257	0.707991	1
Cad74A	4.9922	9.1322	11.3713	7.64114	6.36479	8.47946	6.52284	7.64917	6.53296	6.34258	0.185216	3.10794	1.26268	0.26423	0.948688
Cad86C	11.4821	19.59	14.6537	16.7517	15.654	14.7144	11.6479	20.48	14.7519	14.7148	0.0409936	3.96245	0.0654188	0.79873	1
Cad87A	104.087	112.974	123.795	115.793	107.513	108.737	117.411	105.114	100.945	100.467	0.0836874	6.466	1.11148	0.294673	0.949192
Cad88C	1.99688	1.91482	3.16521	3.23279	1.72021	1.24698	2.09663	2.46747	1.47519	2.53703	0.289158	0.938797	0.741024	0.391694	1
Cad89D	1.99688	2.79858	1.40676	3.52668	3.61245	2.24456	1.63071	3.70121	3.79333	1.77592	-0.0165696	1.75696	0.00252046	0.960075	1
Cad96Ca	31.2013	31.8154	34.3483	33.5034	32.5121	37.16	32.6142	32.3239	38.1441	39.0703	-0.133518	4.81902	1.70788	0.194697	0.910015
Cad96Cb	1.49766	2.2094	1.64122	2.64501	1.89224	0.997584	0.931834	2.22073	1.89667	1.26852	0.407433	1.059	1.173	0.281772	0.948688
Cad99C	36.4431	47.5758	35.2862	43.4957	44.2095	38.9058	31.6824	43.4275	43.8341	40.0851	0.0640402	5.27878	0.313337	0.577075	1
CadN	403.869	347.318	392.837	309.466	288.308	302.268	334.761	272.656	312.529	325.248	0.170892	8.29205	2.5548	0.113578	0.908739
CadN2	83.6194	79.8331	91.6737	80.5258	78.7858	75.0682	90.1549	79.6994	83.6641	87.7814	-0.00582771	6.29508	0.00413048	0.948903	1
Caf1	24.2122	21.063	27.1973	30.5645	28.8996	26.6854	30.2846	28.1292	22.9707	25.3703	-0.019962	4.79206	0.0200732	0.88766	1
Caf1-105	3.74415	2.94587	3.63412	2.64501	6.36479	2.99275	3.49438	4.93495	5.05778	4.56666	-0.108939	2.72014	0.0946268	0.759109	1
Caf1-180	2.99532	2.79858	1.05507	3.52668	0.860107	0.748188	2.32958	1.72723	1.47519	1.77592	0.372371	2.46432	0.433312	0.512103	1
cag	17.2231	12.6672	10.9024	12.3434	10.6653	12.9686	8.85242	11.1036	8.64037	10.1481	0.293296	3.58228	4.39718	0.0388951	0.732657
CAH1	319.251	310.347	316.989	334.447	375.351	325.212	311.931	322.005	331.917	298.609	0.0591569	7.83682	0.783109	0.378626	1
CAH2	134.789	174.543	204.332	151.353	177.526	236.178	150.491	188.268	153.841	177.846	-0.102416	7.41991	1.06805	0.304244	0.957283
CAHbeta	8.23713	12.8145	9.0267	11.4617	11.5254	9.22765	13.2786	9.12965	12.0122	10.4018	-0.028114	3.83648	0.0191996	0.890115	1
cal1	25.2106	24.0088	18.6395	24.3929	24.5991	22.695	23.5288	28.8694	28.0285	26.8926	-0.161668	4.86139	1.11904	0.293047	0.948688
CalpA	137.286	124.758	146.303	120.201	128.5	144.4	137.678	137.685	120.333	130.911	-0.0290041	7.00248	0.187007	0.854919	1
CalpB	90.8581	77.771	92.2599	75.8236	82.0542	86.5404	87.3594	77.7254	83.2426	83.7221	0.00169757	6.29702	0.000644695	0.979801	1
CalpC	8.98596	10.4578	7.61994	9.40447	8.94512	5.9855	6.52284	10.1166	11.38	5.83518	0.176324	3.2913	1.21099	0.289135	0.948688
Cals	403.37	373.242	661.645	306.527	319.788	597.303	591.249	361.238	550.876	700.475	-0.438351	9.10136	5.40672	0.0223822	0.635903
Calx	559.127	524.512	665.631	484.037	469.103	613.763	569.118	489.547	534.228	574.638	-0.0410051	8.95314	0.202582	0.653762	1
calypso	12.4805	11.7835	9.96453	12.6373	14.4498	7.48188	12.5798	10.3634	14.9626	11.9241	0.0840619	3.74234	0.325504	0.695293	1
Cam	2528.05	2811.39	2265.47	2771.97	2889.27	2047.04	2302.1	2802.8	2596.96	2702.7	0.0913827	11.4915	0.709922	0.401776	1
CaMKI	464.275	454.99	612.877	385.29	405.283	603.289	598.237	428.6	520.108	548.76	-0.215665	9.11899	3.33412	0.0712803	0.810646
CaMKII	649.985	578.569	904.897	515.483	516.408	779.612	762.706	547.286	643.181	770.497	-0.145551	9.60651	0.719702	0.398565	1
Camta	209.173	210.482	209.49	180.742	169.441	174.577	217.117	192.463	218.749	227.572	-0.0730047	7.66584	0.514509	0.475111	1
can	0.49922	0	0.23446	0.58778	0.516064	0	0.232958	0	0.632222	0	0.755677	-0.23872	0.820222	0.386424	1
cana	22.9641	27.102	21.3358	28.5073	18.9224	21.6974	20.0344	28.6227	25.7104	23.5944	-0.0171217	4.62962	0.0109804	0.916785	1
CanA1	19.7192	23.2724	24.2666	17.0456	16.17	30.9251	19.1026	24.1812	21.2848	26.1314	-0.261583	4.25443	3.52891	0.0636495	0.804465
CanA-14F	137.785	140.371	137.159	138.128	126.952	135.173	141.173	138.179	148.151	164.146	-0.0953071	7.30728	0.751444	0.388399	1
CanB	159.002	142.58	191.905	160.17	160.668	176.572	170.992	157.425	162.903	188.248	-0.0712965	7.33649	0.78733	0.37735	1
CanB2	71.1389	92.353	84.171	77.293	84.9786	86.5404	80.3707	82.1669	88.9326	88.2888	-0.0536331	6.6123	0.493305	0.526077	1
Cand1	73.8846	67.3131	64.0075	61.423	62.9599	50.378	59.1715	63.9076	55.8463	63.9332	0.168475	5.87151	5.23698	0.0245301	0.648371
Cap	36.4431	54.9405	29.8936	51.1368	55.735	25.6878	36.8074	65.1413	40.2515	36.787	0.153772	5.59466	0.812144	0.36997	1
CAP	521.435	563.398	436.564	489.914	511.764	494.802	503.656	536.182	505.989	534.553	-0.0295471	8.98902	0.143449	0.705796	1
Ca-P60A	4433.82	5498.76	5412.38	3602.21	3951.68	6830.46	4458.13	4376.8	3650.24	4187.63	-0.0374653	11.7682	0.0418468	0.838389	1
Capa	82.8706	75.1197	62.8352	73.7663	57.2831	65.8405	81.7684	79.4526	79.66	71.5443	-0.108417	6.06979	0.532644	0.467454	1
CapaR	1.24805	1.32564	1.05507	2.35112	1.54819	1.74577	1.86367	2.46747	0.842963	3.55185	-0.501207	0.856006	1.65447	0.201757	0.915025
Cap-D2	2.74571	2.3567	3.16521	1.76334	5.16064	3.99033	1.39775	2.96097	3.58259	4.31296	-0.0611263	2.23112	0.0230661	0.879636	1
Cap-D3	16.2247	12.5199	12.5436	14.9884	14.4498	12.7192	16.0741	16.2853	13.0659	16.4907	-0.0873472	3.95814	0.632845	0.428474	1
Cap-G	20.7176	23.4197	15.1226	17.0456	21.5027	17.2083	19.1026	21.2203	19.3882	22.3259	-0.0199932	4.49372	0.0168348	0.897064	1
Cap-H2	56.4119	50.8162	54.5119	45.259	51.2624	52.6225	52.8816	54.7779	48.4704	55.3073	-0.0294801	5.74744	0.127982	0.801611	1
Capr	80.8737	93.8259	50.995	93.7509	84.9786	52.3731	59.1715	90.803	68.28	74.3351	0.224795	6.74775	2.70827	0.103431	0.907192
caps	112.075	105.02	152.282	103.155	102.353	122.204	120.905	100.179	107.899	102.242	0.057761	6.57661	0.401904	0.527768	1
Caps	723.869	669.449	1027.17	601.299	624.266	876.128	912.033	655.608	785.009	942.001	-0.193295	9.5513	2.81253	0.0971133	0.885126
capt	199.438	216.227	205.387	204.253	188.019	222.212	188.463	195.177	183.134	188.248	0.0526419	7.39815	0.599536	0.44085	1
capu	128.549	118.866	128.367	122.552	145.014	126.444	146.298	114.984	120.754	154.759	-0.043352	6.91229	0.176272	0.67563	1
car	33.4478	28.2803	24.2666	29.389	27.5234	19.9517	22.8299	23.1942	27.8178	27.6537	0.226034	4.97047	4.69382	0.0329999	0.698721
cas	0	0	0.11723	0	0	0	0	0	0.210741	0	-0.289892	-0.292473	0.0449639	0.832615	1
Cas	24.961	22.6832	35.8723	25.2745	23.0509	30.1769	28.8869	26.6487	27.3963	27.4	-0.0838663	4.78944	0.165282	0.685336	1
CASK	454.54	400.491	377.597	412.327	385.844	343.169	421.888	369.627	396.403	376.242	0.089948	8.45988	0.969411	0.327552	0.97569
casp	66.6459	57.8863	56.1531	69.9458	65.5402	58.1092	60.3363	73.5307	61.9578	61.9036	-0.00250626	6.01221	0.00111687	0.973416	1
Cat	207.676	283.098	304.798	272.142	235.153	230.442	178.213	218.371	217.906	167.191	0.365144	7.71688	8.95189	0.00360426	0.316027
cathD	369.673	337.744	442.425	355.019	395.649	413.997	366.91	312.876	340.136	326.77	0.110766	8.41005	1.22412	0.271598	0.948688
cato	0	0	0	0	0	0	0	0	0	0	0	-1.30545	0	1	1
Catsup	35.4446	29.1641	28.9558	35.8546	35.2644	25.9372	33.779	43.1808	38.7763	42.6222	-0.169241	5.30721	2.50737	0.116936	0.908739
caup	9.73479	9.1322	9.26116	7.93503	9.80522	12.9686	10.949	11.3504	8.21889	11.9241	-0.262239	3.59455	2.25124	0.137121	0.908739
cav	5.49142	3.68234	3.51689	2.9389	3.61245	3.99033	3.72734	4.44145	4.00407	3.80555	-0.0615886	2.49615	0.0488342	0.825621	1
caz	55.9127	75.267	67.8761	62.0108	68.4645	72.3248	73.3819	65.1413	75.8667	82.7073	-0.160979	6.24674	3.72495	0.0568569	0.804465
cbc	20.7176	17.3806	15.5916	17.3395	19.0944	16.9589	19.3356	18.9995	17.07	18.5203	-0.0172057	3.99805	0.0179894	0.893613	1
Cbl	99.3448	92.2057	105.39	87.5792	85.1506	102.003	90.8538	91.2965	91.4615	106.048	-0.0347824	6.61251	0.222777	0.752102	1
CBP	8.48674	5.15527	4.68919	5.58391	1.37617	5.9855	7.68763	4.93495	3.58259	5.07407	-0.143506	2.72876	0.179096	0.673194	1
Cbp20	14.727	16.055	14.8882	21.1601	18.2343	16.4601	12.3468	17.0256	14.5411	13.9537	0.186033	3.99989	2.02391	0.158408	0.908739
Cbp53E	409.361	382.668	469.154	375.297	367.954	419.733	442.155	390.108	423.589	451.085	-0.0849817	8.77543	0.75887	0.386075	1
Cbp80	40.1872	38.4436	35.9896	36.4423	39.5649	36.1624	34.4779	41.7003	37.9333	38.8166	0.0114391	5.32311	0.0187702	0.926651	1
cbs	33.1981	41.2422	26.4939	36.1484	43.0054	31.1745	32.3812	46.882	36.8796	34.25	-0.0133907	5.50802	0.00910134	0.924215	1
Cbs	72.3869	55.5296	47.1264	62.0108	67.6044	57.6105	61.2681	60.2063	66.1726	54.2925	0.0183839	5.67539	0.017999	0.893585	1
cbt	73.8846	88.6707	69.6345	91.6936	86.6988	72.3248	85.7287	103.387	87.0359	91.8406	-0.102475	6.62421	1.11115	0.294746	0.949192
cbx	29.454	27.2493	29.4247	23.5112	29.4157	31.6733	32.8471	29.6097	28.0285	26.8926	-0.095559	4.76672	0.965835	0.328441	0.97569
Cby	0	0.294587	0.23446	0.29389	0.344043	0	0.232958	0.246747	0.210741	0.507407	0.0229004	-0.394328	0.00081671	0.977266	1
CCAP	1.49766	2.3567	2.22737	2.35112	2.23628	2.49396	1.39775	1.48048	2.52889	1.26852	0.218675	1.23557	0.412336	0.522472	1
CCAP-R	4.9922	4.4188	3.51689	4.70224	2.4083	4.98792	6.98875	4.6882	4.42556	3.55185	-0.320924	2.01276	1.46802	0.228932	0.947073
CCDC151	0	0	0	0	0.172021	0	0	0.740242	0	0	-1.47942	-0.797355	1.65544	0.20179	0.915025
Ccdc56	0	0	0	0	0	0	0	0	0	0	0	-1.30545	0	1	1
CCHa1	5.24181	5.00798	2.69629	5.29002	6.88086	3.74094	3.96029	5.18169	4.21482	7.3574	0.0219629	2.399	0.00750433	0.931166	1
CCHa1-R	10.234	12.6672	20.6324	12.3434	11.3534	14.7144	16.773	10.6101	11.1693	11.1629	0.083036	3.47898	0.240251	0.625256	1
CCHa2	18.4711	30.0479	15.826	13.5189	23.0509	16.9589	17.9378	16.5321	22.9707	18.774	0.12789	5.21891	0.169763	0.681334	1
CCHa2-R	9.73479	8.10114	9.37839	10.2861	10.3213	9.22765	12.8127	9.12965	6.53296	8.11851	0.0570138	2.9004	0.0925449	0.761691	1
Cchl	127.8	156.868	108.555	135.777	150.691	118.962	120.44	164.827	135.506	122.031	0.0382804	7.05747	0.140477	0.708717	1
CCKLR-17D1	9.48518	12.8145	15.0054	13.8128	10.6653	13.4674	11.8809	12.5841	11.5907	10.9092	0.0400849	3.59733	0.0708688	0.790705	1
CCKLR-17D3	18.9704	13.8456	22.2737	21.454	21.3307	22.1962	20.2674	18.2593	17.07	19.0278	0.014318	3.97766	0.0102418	0.919623	1
Ccm3	42.9329	49.3433	56.8565	48.7857	45.2416	48.8816	51.2509	55.2714	57.9537	72.8129	-0.230523	5.98781	4.10843	0.0457254	0.7694
Ccn	54.6646	57.739	49.1193	55.5452	59.3474	47.3852	60.3363	62.6738	56.6893	50.487	-0.00746688	5.85112	0.00727998	0.9322	1
Ccp84Aa	0.74883	1.76752	4.22027	1.46945	4.12851	0.498792	0.931834	0.986989	1.26444	1.01481	1.41398	0.501346	3.39429	0.0688222	0.804465
Ccp84Ab	2.99532	4.27151	5.5098	8.81669	3.61245	1.99517	0.232958	2.22073	2.73963	2.02963	1.4167	1.31987	4.74222	0.0321321	0.689504
Ccp84Ac	0	0.294587	0	0.29389	0	0	0	0	0.210741	0	0.879445	-1.24106	0.629803	0.46687	1
Ccp84Ad	0	0	0.11723	0.58778	0.172021	0.249396	0	0	0	0	1.23836	-1.04854	0.770924	0.383483	1
Ccp84Ae	0	0	0	0	0	0	0	0	0	0	0	-1.17294	0	1	1
Ccp84Af	0	0	0	0	0	0	0	0	0	0	0	-1.29805	0	1	1
Ccp84Ag	2.4961	2.50399	3.04798	2.05723	3.44043	2.74336	3.26142	2.22073	1.89667	2.28333	0.15246	1.99316	0.217217	0.642331	1
Ccs	8.98596	10.4578	9.49562	12.9312	15.4819	12.2204	11.6479	15.5451	13.9089	7.8648	-0.101013	3.73568	0.471259	0.49423	1
Cct1	160.25	155.542	139.386	168.399	161.012	141.657	168.662	147.308	156.159	150.446	0.0364817	7.25654	0.25307	0.811379	1
Cct2	90.6085	77.6237	70.2207	84.6403	98.7403	70.579	80.1377	97.7119	87.0359	89.0499	-0.0114507	6.12131	0.011064	0.91647	1
Cct5	60.156	53.6148	36.6929	50.8429	50.0582	30.6757	37.2734	41.7003	40.2515	32.474	0.455627	5.46661	9.06373	0.00341007	0.31411
Cctgamma	51.1701	45.2191	35.7551	47.6102	48.6821	22.9444	36.3415	37.9991	35.8259	33.4888	0.448451	5.33523	8.33538	0.00490156	0.372674
c-cup	0	0	0.11723	0	0	0	0	0	0	0	1.22117	-0.936187	1.48985	0.293262	0.948688
Ccz1	19.9688	17.6752	22.3909	19.1028	19.6104	17.2083	17.006	17.2723	22.9707	21.8185	0.0376954	4.2839	0.102359	0.749783	1
cd	7.4883	8.54302	11.3713	8.81669	7.91299	11.7216	9.5513	10.8569	7.37593	7.6111	-0.0751643	3.77093	0.150112	0.803208	1
CD98hc	350.453	332.736	295.419	321.515	346.795	349.902	377.626	367.9	379.966	354.17	-0.152052	8.64963	6.39601	0.0132369	0.527416
Cda4	0.74883	0.883761	1.40676	4.40835	2.58032	1.24698	0.465917	0.986989	2.52889	0.76111	0.637955	0.982132	1.72803	0.192111	0.910015
Cda5	95.1014	116.951	137.979	101.98	97.8802	115.221	122.303	106.595	125.18	120.509	-0.0977129	7.14121	0.817626	0.368367	1
Cda9	1.49766	1.03105	1.40676	1.17556	1.54819	0.997584	0.232958	0.740242	0.842963	2.28333	0.394551	0.636625	0.567516	0.453278	1
CDase	57.4103	56.708	51.4639	64.9497	72.249	51.1262	68.9557	74.7644	59.2182	60.6351	-0.0581805	5.87697	0.354278	0.553243	1
cdc14	121.56	115.773	135.049	114.617	114.566	121.206	125.099	113.504	120.965	118.479	0.00648546	7.02542	0.00844125	0.927007	1
Cdc16	15.7254	11.1943	15.826	13.225	11.3534	15.7119	16.3071	14.0646	14.3304	16.9981	-0.201753	3.89474	1.99588	0.161287	0.908739
cdc2	1.24805	0.147293	0.586149	0.58778	0.516064	0.997584	0.465917	0.246747	0.210741	0.76111	0.121608	1.39423	0.0179986	0.893586	1
Cdc23	4.74259	3.38775	3.98581	7.05336	4.47256	4.73852	3.96029	5.42844	3.16111	3.80555	0.127514	2.47053	0.238732	0.696543	1
Cdc27	48.1747	52.1419	37.1619	52.3124	54.8748	38.9058	44.961	54.7779	53.1067	51.2481	0.00560096	5.59861	0.0030778	0.955885	1
cdc2c	8.23713	6.92279	9.26116	13.225	9.11714	12.2204	8.85242	10.3634	8.21889	8.37221	-0.056506	3.31233	0.0524726	0.819352	1
cdc2rk	12.4805	12.2254	13.7159	14.1067	9.46118	15.9613	16.3071	13.0776	13.6981	10.9092	-0.178859	3.68698	1.86432	0.175641	0.908739
Cdc37	33.1981	44.6299	19.4601	34.679	45.5857	17.9565	26.3243	38.7393	30.7682	25.8777	0.341666	5.15592	3.36843	0.0698669	0.807646
Cdc42	105.835	98.5393	115.354	105.506	111.642	111.979	107.161	101.907	103.263	124.061	-0.0296554	6.67131	0.216791	0.672658	1
CDC45L	9.48518	11.1943	10.5507	15.8701	10.8374	11.2228	14.6764	9.62315	13.0659	11.4167	-0.0687927	3.87373	0.109471	0.741541	1
Cdc5	23.4633	26.8074	16.2949	30.8584	32.34	19.7023	15.1423	27.6357	25.9211	23.8481	0.198224	4.67973	1.41781	0.236997	0.948688
Cdc6	0	1.17835	0.11723	0.58778	0.172021	0	0	0.246747	0	0	2.61008	0.96099	3.91255	0.0510851	0.804235
Cdep	485.242	439.229	455.086	416.148	363.653	375.59	438.661	367.654	425.907	442.459	0.0746793	8.58972	0.60691	0.438063	1
CdGAPr	96.5991	84.2519	84.171	73.7663	76.2055	75.3176	92.0186	79.6994	83.2426	76.3647	0.0291208	6.32206	0.0966142	0.756673	1
cdi	119.064	115.331	114.534	118.438	100.461	113.974	146.065	126.335	134.663	138.015	-0.21589	7.01822	5.30982	0.0235828	0.63727
Cdk12	60.156	61.4214	56.8565	58.4841	61.4117	52.8719	58.0067	58.7259	52.2637	62.1573	0.0713464	5.94411	0.966017	0.328395	0.97569
Cdk4	14.9766	17.3806	19.6946	14.6945	15.3099	19.2035	19.8015	19.9865	17.2807	16.237	-0.160263	4.35087	1.18915	0.278506	0.948688
Cdk5	27.7067	25.0399	26.9629	24.099	24.427	21.448	20.7333	20.2333	22.3385	23.087	0.250462	4.57173	5.57874	0.0204071	0.619508
Cdk5alpha	232.886	234.639	250.755	233.936	231.197	235.929	244.141	238.851	226.968	246.853	-0.0109626	7.77097	0.032114	0.958289	1
Cdk7	7.23869	7.65926	8.67501	8.81669	8.08501	6.98309	7.68763	10.3634	7.37593	12.1778	-0.134017	3.21356	0.487863	0.486741	1
Cdk8	4.9922	2.65128	2.81352	2.64501	4.8166	2.74336	4.19325	4.44145	4.42556	3.55185	-0.129209	2.2188	0.232476	0.630902	1
Cdk9	21.2169	27.102	19.2257	24.3929	23.911	20.9493	22.1311	23.1942	21.0741	23.8481	0.0581102	4.40825	0.229718	0.632933	1
Cdlc2	0	0	0	0	0	0	0	0	0	0	0	-1.29815	0	1	1
cdm	203.682	190.009	181.706	192.204	186.127	185.052	185.901	190.982	171.754	199.411	0.0312063	7.26105	0.321171	0.572361	1
CdsA	988.206	928.096	1480.14	911.352	925.475	1278.15	1176.67	865.096	964.982	1129.23	-0.0485514	9.74586	0.226088	0.635629	1
CecA1	4.49298	0	0.11723	1.46945	0	0.748188	25.6254	0	39.1978	3.80555	-3.87684	2.34376	9.92132	0.00223841	0.277347
CecA2	1.74727	0	0	0	0	0	2.7955	0	8.85111	2.02963	-3.3225	1.58751	5.64415	0.019705	0.615258
CecB	1.74727	0.147293	0.11723	1.76334	0.172021	0	14.9093	0	20.2311	0.253703	-3.42269	0.624845	9.68947	0.00266843	0.282499
CecC	5.74103	0	0	18.2212	0.172021	0.249396	46.8247	0	88.9326	2.28333	-2.75269	2.00865	8.18019	0.00535311	0.387626
Ced-12	27.7067	30.4897	24.1493	29.9768	30.6198	24.1914	30.0516	32.3239	26.1319	28.1611	0.018555	4.80813	0.0338621	0.98168	1
ced-6	130.047	148.177	125.905	135.483	132.112	116.218	140.241	139.906	135.296	120.509	0.0423793	7.42472	0.296975	0.587177	1
Cen	84.3682	87.0504	63.1869	93.457	92.3755	62.8478	80.1377	87.842	80.7137	78.648	0.103923	6.2983	0.942414	0.334344	0.978579
CenB1A	61.1545	66.8712	52.4017	64.3619	64.508	46.637	56.8419	63.6608	55.0033	58.0981	0.140523	5.98421	2.86054	0.094349	0.876277
CenG1A	135.538	127.556	121.685	135.483	129.876	105.744	118.809	121.4	115.486	117.972	0.165007	6.85928	4.78602	0.0313676	0.685562
Cenp-C	4.74259	5.00798	4.45473	2.9389	4.8166	4.98792	6.7558	5.67519	4.6363	8.37221	-0.440865	2.96348	2.40829	0.124317	0.908739
Cep135	10.234	11.3416	6.56487	11.7556	11.6975	9.22765	9.78426	12.3374	10.9585	7.10369	0.0434412	3.4614	0.0486519	0.953908	1
Cep89	0	0	0	0	0	0	0	0.246747	0	0	-1.52965	-1.2483	2.13459	0.19043	0.908739
Cep97	36.9423	49.4906	35.4034	44.9651	50.0582	37.6588	41.4666	52.0637	45.3093	48.2036	-0.0510928	5.50172	0.229287	0.633252	1
cer	22.4649	29.1641	23.0943	19.1028	24.083	26.436	18.4037	29.8564	25.9211	19.5352	-0.0183976	4.551	0.0155776	0.927758	1
Cerk	99.844	88.9653	97.418	87.8731	85.3226	88.7849	83.6321	85.3746	84.2963	85.7517	0.102984	6.436	2.7134	0.103109	0.906788
cert	39.4384	45.0718	33.5277	46.4346	43.6934	43.8937	44.0292	48.3625	44.677	47.4425	-0.13769	5.59057	3.31483	0.0720886	0.810646
cerv	12.2309	11.047	11.2541	13.8128	12.5576	12.9686	12.3468	14.5581	13.2767	12.6852	-0.12188	3.82754	0.976025	0.325916	0.975653
Cf2	101.591	90.2909	103.631	78.1747	79.6459	112.228	98.5414	88.829	87.4574	102.496	-0.108517	6.55094	1.10165	0.296804	0.950573
Cfp1	11.9813	17.6752	8.20609	19.1028	17.8902	9.47704	12.3468	17.7658	14.5411	13.7	0.125154	4.17625	0.473256	0.49332	1
cg	224.899	210.924	209.372	227.177	219.843	212.984	232.958	234.903	218.538	239.496	-0.0608338	7.79686	1.06248	0.305501	0.958542
CG10000	0	0	0	0	0	0	0.232958	0	0	0	-1.52435	-1.03165	2.09818	0.19043	0.908739
CG10005	0.24961	0.294587	0.351689	0	0.172021	0	0.232958	0.493495	0	0.253703	0.265752	-0.757912	0.0995935	0.753072	1
CG10011	159.75	158.93	142.669	144.3	139.509	130.933	166.332	162.113	160.584	172.772	-0.0895396	7.31117	0.624044	0.431692	1
CG10013	0	0	0	0	0	0	0	0	0	0	0	-1.23566	0	1	1
CG10014	0.24961	0	0	0	0	0	0.232958	0.493495	0	0	-1.4702	2.43845	2.04747	0.186031	0.908739
CG10019	22.9641	15.9077	28.8385	19.3967	23.3949	24.9396	20.5003	17.2723	18.9667	24.1018	0.0713327	4.36495	0.204089	0.652563	1
CG10026	9.48518	12.0781	9.37839	15.5762	9.97724	10.4746	13.9775	15.0516	14.3304	12.6852	-0.255148	3.93782	1.3304	0.251887	0.948688
CG10029	0	0	0	0	0	0	0	0	0	0	0	-1.29851	0	1	1
CG10031	12.4805	24.598	15.0054	22.0417	20.6426	18.4553	23.5288	14.3113	20.2311	14.9685	0.0483446	4.59264	0.0248398	0.875131	1
CG10032	0	0	0	0	0	0	0	0	0	0	0	-1.29805	0	1	1
CG10035	0.74883	0.736467	0.820609	0	0.172021	0.748188	0.698875	0.493495	0.421482	0.507407	-0.0941536	0.103006	0.0206224	0.964159	1
CG10038	10.9828	11.1943	12.4264	13.8128	11.0094	13.218	9.78426	11.3504	10.9585	10.9092	0.076465	3.57252	0.235009	0.629051	1
CG10041	0	0	0.23446	0	0.172021	0.748188	0.232958	0	0	0.253703	-1.07781	-0.747885	1.22823	0.270945	0.948688
CG10050	6.48986	4.5661	7.97163	3.82057	6.53682	6.48429	7.45467	6.90893	4.00407	5.07407	0.00191758	2.61481	9.2955e-05	0.992329	1
CG10051	0.49922	0.294587	0.586149	0	0.344043	0.498792	0.465917	0.493495	0.421482	1.26852	-0.710993	-0.251973	1.01572	0.316326	0.967134
CG10053	4.9922	5.44986	1.75845	2.64501	3.26841	1.99517	3.49438	5.18169	3.16111	4.05925	0.00855215	2.10231	0.00105491	0.974164	1
CG10055	19.7192	22.3886	16.4122	18.5151	19.4384	11.2228	18.8696	19.2463	22.76	21.5648	0.0391756	4.47945	0.0904519	0.81214	1
CG10062	13.4789	17.8225	21.4531	13.8128	15.998	21.448	21.1992	16.0386	20.6526	17.5055	-0.213746	3.60266	1.88299	0.173515	0.908739
CG10063	0.24961	0	0	0	0.344043	0	0.232958	0	0	0	0.885798	-1.08449	0.568453	0.46687	1
CG10064	0	0	0	0	0	0	0	0.246747	0	0	-1.52943	-0.831863	1.74921	0.19043	0.908739
CG10068	19.22	20.1792	24.8527	19.6906	21.8467	25.189	21.8981	17.2723	21.4956	23.5944	-0.040609	4.5937	0.116989	0.917746	1
CG10073	0	0.147293	0.351689	0.58778	0.172021	0	0.232958	0.493495	0.210741	0.253703	0.0376086	-0.417945	0.00148094	0.969391	1
CG10075	17.4727	24.3034	20.5152	26.1562	24.427	25.6878	23.0629	23.1942	18.5452	19.2815	0.0401858	4.46526	0.12437	0.725193	1
CG10077	2888.49	2433.44	3408.57	2503.94	2445.63	3143.39	3048.26	2286.36	2624.35	3003.59	-0.0441556	11.2953	0.229151	0.633353	1
CG10081	0	0	0	0	0	0	0	0	0	0	0	-1.29808	0	1	1
CG10082	410.359	404.026	363.999	390.286	413.196	365.116	398.126	403.432	374.276	404.403	0.0267157	8.60236	0.168933	0.682071	1
CG10086	0	0	0	0	0	0	0	0	0	0	0	-1.05947	0	1	1
CG10089	81.3729	60.8322	86.9845	71.7091	71.2169	86.291	80.6036	69.0893	68.28	71.798	-0.0145559	6.12206	0.0267608	0.968688	1
CG10092	13.9782	16.9387	13.8331	15.8701	13.2457	14.7144	14.4434	15.0516	15.3841	12.4315	0.0333946	3.99127	0.09107	0.807097	1
CG10096	0	0	0	0	0	0	0	0	0	0	0	-1.30545	0	1	1
CG10097	0	0	0	0	0	0	0	0	0	0	0	-1.30545	0	1	1
CG10098	45.9283	48.165	49.471	48.4918	52.1225	42.8961	46.8247	50.0897	50.5778	44.9055	0.0539359	5.54119	0.435889	0.510854	1
CG10103	106.833	81.0114	70.1034	87.5792	90.4833	71.5766	79.2059	71.0632	73.97	72.8129	0.238071	6.15732	9.38643	0.0029083	0.294831
CG10104	0	0	0	0	0	0	0	0	0	0	0	-1.28358	0	1	1
CG10116	0.74883	0.883761	0.468919	0.58778	0.860107	1.24698	0.465917	0.740242	0	0.76111	0.167757	0.183912	0.0792599	0.77897	1
CG10126	31.9501	35.3504	32.121	32.034	28.7276	35.6636	40.5348	33.3109	46.7845	30.9518	-0.226842	5.26568	4.14038	0.0449099	0.768893
CG10131	10.7332	13.551	9.8473	14.4006	11.3534	5.48671	7.45467	13.0776	11.5907	8.11851	0.374491	3.58612	3.01625	0.0859665	0.851091
CG10132	144.524	140.665	122.388	145.475	135.381	116.967	133.252	131.516	119.069	134.716	0.114159	6.94382	1.32774	0.252357	0.948688
CG10133	6.73947	7.95385	5.97872	6.46558	5.84873	5.9855	6.28988	6.66218	6.32222	5.58147	0.0957095	2.89973	0.310125	0.57903	1
CG10137	98.8456	87.4923	86.8673	91.9875	88.075	83.2982	85.2628	87.1018	80.2922	92.0943	0.0814601	6.34091	1.35466	0.247641	0.948688
CG10139	14.9766	16.2023	15.4743	17.3395	19.6104	18.9541	18.1708	14.8048	15.8056	14.4611	0.0236298	4.05346	0.029889	0.864839	1
CG10140	0	0	0	0.29389	0	0	0.232958	0	0	0	-0.22349	-0.91156	0.043181	0.835893	1
CG10144	24.4618	21.3576	28.4868	22.9234	23.0509	23.6926	27.2561	24.1812	24.8674	24.1018	-0.041901	4.55439	0.157107	0.779322	1
CG10147	10.4836	8.54302	10.199	9.69836	8.08501	10.2252	9.31834	7.64917	12.6444	10.1481	-0.0965189	3.54101	0.303324	0.583214	1
CG10151	25.7098	30.1952	22.2737	31.1523	24.5991	23.942	20.5003	24.6747	26.5533	26.3851	0.127492	4.60787	1.03385	0.312069	0.964448
CG10154	0	0	0	0	0	0	0	0	0	0	0	-1.30545	0	1	1
CG10157	11.7317	18.4117	8.67501	14.9884	14.9659	16.7095	13.2786	16.0386	14.7519	9.89443	-0.0452899	3.75936	0.0304001	0.86199	1
CG10158	17.4727	17.3806	14.302	18.5151	17.8902	14.2156	11.6479	15.5451	15.5948	16.237	0.216791	4.26453	2.88527	0.0929595	0.875471
CG10163	0.24961	0	0	0	0	0	0	0	0	0	1.29214	-1.22641	1.09338	0.302856	0.956509
CG10164	0	0	0	0	0	0	0.232958	0	0	0	-1.5243	-1.24807	2.11202	0.19043	0.908739
CG10165	5.74103	6.48091	10.6679	6.17169	7.74097	7.23248	7.68763	7.64917	9.27259	5.83518	-0.00846386	3.10834	0.00183162	0.965961	1
CG10166	19.7192	16.9387	22.6254	19.3967	17.8902	20.4505	18.6367	14.0646	15.5948	15.7296	0.195012	4.18526	2.42052	0.123378	0.908739
CG10168	0	0	0	0	0	0	0	0	0	0	0	-1.28375	0	1	1
CG10170	0	0	0	0	0	0	0	0	0	0	0	-1.00613	0	1	1
CG10171	10.9828	9.27949	12.778	10.8739	8.94512	9.72644	10.7161	8.63616	12.6444	11.6704	-0.0153272	3.79855	0.00995232	0.95392	1
CG10175	55.4134	68.9333	100.583	53.1941	47.822	81.3031	56.376	65.1413	68.28	65.9629	-0.0374535	6.0865	0.0565753	0.812551	1
CG10176	16.2247	19.0009	33.176	20.8662	20.6426	32.4215	29.5857	23.6877	17.913	27.9074	-0.2398	4.36257	1.61991	0.206489	0.919984
CG10177	0.99844	0.147293	0.703379	0.881669	1.03213	0.249396	0.465917	0.493495	1.0537	0.253703	0.473423	-0.061879	0.665143	0.429298	1
CG10178	15.4758	20.7684	23.0943	20.5723	27.1794	15.9613	28.8869	20.48	28.8715	18.5203	-0.0689294	4.86079	0.137649	0.711529	1
CG10182	0	0	0.11723	0	0	0	0	0	0	0	1.22107	-0.962565	0.934517	0.33716	0.980666
CG10183	0	0	0.11723	0	0	0.249396	0	0	0	0	-0.309993	-1.09625	0.0579713	0.829654	1
CG10184	11.2325	12.6672	12.3091	13.8128	18.0623	11.4722	11.415	11.8439	16.0163	10.6555	0.145697	3.53662	0.654838	0.420591	1
CG10185	2.74571	16.6442	1.75845	2.05723	8.94512	73.5718	3.02846	15.2983	1.68593	0.76111	-1.4588	4.85916	3.13057	0.0803339	0.835905
CG10186	1781.22	1651.9	1456.81	1779.8	1795.22	1405.35	1517.72	1638.4	1442.52	1546.58	0.164803	10.4472	4.40241	0.0387821	0.731823
CG10188	136.786	122.254	109.258	122.846	120.071	108.238	114.383	117.452	109.796	122.792	0.0926971	6.77495	1.33531	0.25102	0.948688
CG10189	23.713	20.3265	22.6254	21.454	23.5669	26.436	20.5003	28.8694	27.8178	22.5796	-0.177058	4.01575	1.79305	0.184037	0.908739
CG10194	12.2309	12.3727	15.1226	12.0495	14.9659	15.7119	15.3753	10.6101	14.3304	14.2074	-0.0644517	3.92168	0.215504	0.706366	1
CG10195	9.9844	13.6983	14.8882	13.225	12.2135	19.2035	14.4434	11.5971	12.223	10.9092	-0.0832109	3.95767	0.373919	0.657852	1
CG10202	0	0	0	0	0.172021	0	0	0	0.210741	0	-0.25525	-0.661446	0.0496588	0.829654	1
CG10205	79.6256	85.8721	82.647	67.3008	70.5288	91.7777	61.734	84.6343	71.4411	84.9906	-0.0280619	6.25391	0.0549475	0.815217	1
CG10208	5.74103	6.48091	4.68919	4.11446	5.67671	7.98067	8.61946	5.67519	5.90074	7.10369	-0.388879	2.85512	4.26682	0.0418327	0.748381
CG10209	20.7176	21.063	8.20609	17.3395	17.2021	11.7216	13.5116	16.2853	14.3304	14.7148	0.243584	4.06542	2.21556	0.140234	0.908739
CG10211	79.8752	90.2909	117.347	69.358	76.5495	90.5307	98.3085	87.1018	94.8333	74.3351	-0.0325949	6.27049	0.0468439	0.829155	1
CG10214	11.7317	12.0781	14.6537	13.5189	11.1814	11.2228	12.5798	9.12965	12.223	11.1629	0.165836	3.75384	1.6337	0.204585	0.916321
CG10217	55.9127	58.3282	64.0075	54.9574	51.6064	67.8357	56.8419	50.3365	55.8463	61.1425	-0.0332048	5.68205	0.177784	0.873244	1
CG10219	184.961	214.312	267.987	170.456	192.32	264.858	181.009	190.982	184.609	194.337	0.0230235	7.37345	0.0338781	0.854394	1
CG10222	4.9922	4.5661	5.39257	3.23279	4.47256	5.73611	4.89213	6.41543	6.53296	5.58147	-0.341742	2.64265	2.286	0.134163	0.908739
CG10226	172.231	206.8	229.067	190.441	210.038	193.282	170.06	187.775	175.126	169.474	0.172794	7.25651	3.77752	0.0551716	0.804465
CG10232	0.74883	0.44188	1.05507	0.58778	0.344043	0.997584	0.465917	1.23374	1.0537	0.253703	-0.299876	0.473712	0.245895	0.621229	1
CG10237	109.329	149.208	166.935	131.369	119.211	139.163	114.616	156.438	131.924	110.361	0.054063	7.20554	0.227535	0.634551	1
CG1024	10.7332	13.2564	11.1368	10.8739	15.1379	11.4722	15.3753	14.8048	12.6444	13.1926	-0.13456	3.9177	1.05299	0.30766	0.960295
CG10249	120.811	113.711	127.546	126.667	114.738	126.444	121.837	120.413	130.449	119.494	-0.0363706	6.99613	0.407353	0.524989	1
CG10252	0	0	0.23446	0	0.344043	0	0.232958	0.246747	0	0.253703	-0.0738103	-0.981903	0.00462332	0.982075	1
CG10253	54.9142	44.4826	47.3608	53.4879	46.1018	46.3876	51.7168	44.4145	47.6274	52.7703	0.0157367	5.55793	0.0351457	0.857238	1
CG10254	87.3635	84.6937	97.5352	83.4647	88.9351	87.2886	97.1437	89.816	87.0359	90.0647	-0.0286598	6.53951	0.0642033	0.800568	1
CG10257	17.4727	16.4969	15.7088	18.8089	20.4706	22.9444	25.3925	18.0126	21.4956	21.0574	-0.297222	4.37351	5.34421	0.023149	0.635903
CG10262	9.73479	10.1632	10.5507	9.69836	10.4933	7.23248	9.31834	9.86989	8.85111	9.89443	0.169188	3.19087	0.962037	0.329388	0.97569
CG10264	0.24961	0	0	0	0	0	0	0	0	0.253703	-0.239904	-1.24029	0.0462765	0.83079	1
CG10265	6.98908	6.92279	7.38548	10.8739	9.28916	8.47946	6.52284	9.62315	8.85111	7.3574	0.00452724	3.22879	0.000645723	0.979785	1
CG10268	5.24181	5.89174	4.92365	5.58391	8.08501	4.48913	5.12509	8.38941	6.95445	7.3574	-0.118139	3.15318	0.409124	0.524092	1
CG10274	17.7223	13.1091	10.3162	13.225	14.2778	10.724	12.3468	15.7918	13.2767	10.9092	0.107107	3.91405	0.519986	0.606292	1
CG10280	0	0	0	0	0	0	0	0	0	0.253703	-1.53215	-1.24843	2.41011	0.19043	0.908739
CG10283	42.6833	46.5447	40.0926	45.8468	51.2624	48.3828	48.6883	54.2844	47.8382	47.4425	-0.123728	5.66142	2.06867	0.153933	0.908739
CG10286	9.73479	11.3416	8.79224	11.1678	11.1814	9.22765	9.78426	14.0646	12.8552	7.8648	-0.0511487	3.60222	0.0877582	0.767751	1
CG10289	139.532	130.944	149.702	115.499	116.459	148.889	166.798	144.347	148.151	169.22	-0.251892	7.25068	6.85574	0.0104179	0.48363
CG10298	0	0.147293	0	0	0	0	0	0	0	0	1.2458	-1.27746	1.6777	0.293262	0.948688
CG10300	0	0	0	0	0	0	0.232958	0	0	0	-1.52435	-1.02446	1.70414	0.196801	0.910015
CG10301	0	0	0	0	0	0	0	0	0	0	0	-0.950722	0	1	1
CG10306	100.593	108.85	81.9436	107.858	116.459	83.5476	83.1662	118.439	93.3582	84.7369	0.153241	6.796	2.29758	0.133194	0.908739
CG10307	42.4337	50.2271	37.9825	34.679	42.3173	45.6395	41.4666	44.908	33.9293	39.324	0.0216108	5.10287	0.0218855	0.882734	1
CG10311	73.3854	76.4453	109.258	62.8924	75.1734	123.95	81.5355	78.7124	68.0693	81.1851	-0.11809	6.19721	1.18779	0.278779	0.948688
CG10317	0	0.294587	0.351689	0	0.172021	0.748188	0.465917	0	0.421482	0	-0.67958	-0.886531	0.578192	0.449851	1
CG10320	116.318	168.356	126.843	144.594	152.583	144.899	108.792	152.737	114.854	94.8851	0.202905	6.99346	2.35455	0.128539	0.908739
CG10321	58.6584	57.2972	36.9274	57.0146	56.423	41.6491	48.9213	51.5702	47.6274	47.6962	0.1593	5.70899	2.34038	0.12968	0.908739
CG10324	5.24181	8.69031	2.69629	7.64114	7.74097	3.74094	4.42621	7.15567	4.6363	4.82036	0.350184	2.84345	1.66008	0.201002	0.915025
CG10326	80.6241	86.0194	82.9987	86.1097	87.5589	97.7632	87.1265	89.5693	83.6641	90.0647	-0.0818732	6.37914	1.36781	0.245377	0.948688
CG10332	0	0	0	0	0	0	0	0	0	0	0	-1.30545	0	1	1
CG10333	33.6974	35.2031	22.1564	34.679	35.9525	21.448	23.9947	34.5446	30.5574	26.6389	0.228727	5.00522	2.64238	0.107658	0.908739
CG10336	1.24805	1.76752	1.52399	1.17556	1.54819	1.24698	0.698875	1.23374	0.842963	2.02963	0.302821	1.26183	0.381777	0.538265	1
CG10337	6.98908	1.03105	2.93075	1.46945	1.03213	3.24215	2.56254	1.23374	2.73963	2.79074	0.0461982	1.62132	0.0179986	0.945288	1
CG10338	15.975	12.8145	16.6466	15.2823	18.0623	18.9541	20.0344	15.5451	16.8593	15.9833	-0.149236	4.33532	1.53051	0.219359	0.93666
CG10339	7.4883	10.7524	8.90947	5.8778	8.25703	10.9734	9.78426	9.86989	9.27259	4.82036	-0.0925903	3.15341	0.236363	0.700475	1
CG10340	37.1919	43.7462	34.9345	47.904	46.7898	41.1503	37.7393	43.921	36.0367	31.9666	0.138866	5.26226	1.41965	0.236694	0.948688
CG10341	12.7301	12.0781	9.37839	13.8128	15.654	9.97584	10.4831	16.5321	16.8593	9.13332	-0.00136852	3.77181	7.5045e-05	0.993108	1
CG10343	10.234	11.047	7.26825	8.81669	11.6975	7.98067	8.15355	13.0776	10.9585	9.13332	-0.0108917	3.54069	0.00387276	0.950521	1
CG10344	3.99376	2.3567	5.39257	3.52668	2.92436	5.73611	3.49438	2.96097	4.00407	5.58147	-0.242613	2.11379	0.760711	0.385502	1
CG10345	67.8939	114.594	87.4534	76.4114	89.1071	79.5573	95.28	79.2059	69.3337	70.0221	0.151572	6.47468	0.704109	0.403702	1
CG10347	23.2137	18.1171	23.446	15.8701	19.2664	23.942	25.6254	17.2723	23.603	21.3111	-0.15628	4.38572	1.68613	0.197536	0.910015
CG10348	3.74415	6.03903	4.10304	5.58391	4.64458	4.23973	5.35805	3.20772	5.26852	4.82036	0.068451	2.47781	0.0925652	0.761666	1
CG10352	18.7208	14.5821	25.3216	11.1678	22.3628	23.942	27.4891	19.493	21.0741	21.5648	-0.281197	4.03851	3.62815	0.0601073	0.804465
CG10353	136.786	143.317	150.875	146.945	133.833	156.87	141.406	147.308	147.94	164.653	-0.0907322	7.54977	1.71119	0.19427	0.910015
CG10357	0	0.147293	8.20609	0	0.172021	0	0.232958	0	0.210741	0	4.09026	1.26081	4.86335	0.0301928	0.679519
CG10359	9.23557	15.0239	18.5223	11.4617	11.6975	14.7144	11.182	12.8309	12.223	11.9241	0.0940551	3.46047	0.280204	0.597913	1
CG10361	3.49454	5.89174	5.39257	4.11446	7.39692	2.49396	3.49438	4.1947	4.42556	3.80555	0.537304	2.997	3.49748	0.0648183	0.804465
CG10362	105.335	97.361	84.8744	105.8	100.977	85.5428	78.507	99.1924	83.2426	92.0943	0.170631	6.47814	4.87463	0.0298795	0.677229
CG10365	62.1529	54.6459	35.7551	54.6635	52.9826	52.8719	57.5407	49.3495	49.1026	58.0981	-0.0436062	5.61501	0.187126	0.666387	1
CG10366	15.4758	21.5048	16.1777	19.3967	19.7825	14.2156	17.006	21.2203	21.0741	17.7592	0.0159355	4.43305	0.0151737	0.922528	1
CG10375	20.2184	22.5359	14.5365	23.2173	25.8032	17.7071	16.3071	25.415	20.6526	20.8037	0.068189	4.40598	0.280187	0.748275	1
CG10376	26.7083	26.0709	27.9007	23.8051	28.7276	29.6781	33.3131	29.3629	28.2393	41.0999	-0.273525	5.08569	7.8641	0.0062159	0.404541
CG10383	53.6662	46.3974	37.3963	57.0146	31.824	47.1358	50.0861	38.7393	46.1522	40.0851	0.0143665	5.54183	0.0052607	0.942346	1
CG10384	139.282	109.144	129.422	115.205	101.149	106.243	102.968	107.829	109.585	108.331	0.150841	6.76053	3.18153	0.0779549	0.823678
CG10395	12.2309	14.8766	15.826	11.4617	14.4498	17.9565	19.5685	11.5971	15.5948	14.9685	-0.195632	4.07598	1.39767	0.240329	0.948688
CG10396	0	0	0.11723	0.29389	0	0.997584	0	0.246747	0	0.76111	-2.10329	-0.744841	4.99471	0.0279813	0.666304
CG10399	4.74259	5.59715	3.16521	5.29002	3.44043	4.73852	3.26142	5.42844	4.42556	2.28333	0.119613	2.25751	0.218991	0.688644	1
CG10405	0	0.147293	0	0	0.172021	0	0	0	0.210741	0	0.398033	-0.89003	0.0833162	0.773647	1
CG10407	9.23557	10.3105	12.3091	9.99225	11.5254	15.2132	7.68763	9.86989	11.1693	6.84999	0.0804479	2.8238	0.124447	0.725112	1
CG1041	32.4493	32.11	28.4868	25.8623	28.2115	30.6757	28.4209	33.8044	32.0326	26.3851	-0.0393295	4.94796	0.126879	0.722551	1
CG10413	93.6038	87.0504	130.711	82.583	78.4418	104.746	104.831	69.0893	96.0978	101.735	-0.00845855	6.50155	0.00586548	0.939128	1
CG10417	82.3713	88.818	120.629	91.6936	91.5154	120.209	115.78	91.0498	107.899	120.002	-0.220866	6.71051	4.79291	0.0312491	0.685063
CG10418	8.48674	5.30257	4.57196	3.52668	5.84873	3.99033	3.26142	5.67519	6.53296	6.08888	0.108832	2.52509	0.242648	0.651952	1
CG10420	16.7239	17.6752	13.5987	17.0456	19.2664	11.4722	17.006	18.7528	15.5948	14.7148	0.115514	4.08094	0.671874	0.414634	1
CG10424	16.2247	16.055	14.8882	18.5151	14.2778	14.465	12.8127	17.5191	16.8593	13.1926	0.0853375	3.99328	0.403078	0.56754	1
CG10425	15.975	13.4037	13.9503	12.9312	14.4498	12.7192	11.6479	13.5711	15.1733	14.4611	0.0634385	3.99182	0.261846	0.613097	1
CG10426	35.6942	31.9627	40.6787	30.2707	34.9204	40.6515	38.4382	34.2979	31.4004	36.0259	-0.0532993	5.04272	0.358289	0.757071	1
CG10428	22.4649	25.0399	26.3767	22.0417	24.7711	31.1745	25.1595	28.6227	30.9789	27.4	-0.241422	4.80932	6.21909	0.0145256	0.539933
CG10431	4.49298	4.12422	5.04088	4.70224	3.09639	2.49396	1.86367	4.1947	3.37185	4.31296	0.401064	1.99759	3.30966	0.0723071	0.810646
CG10433	319.002	298.417	300.108	323.279	365.89	318.479	360.62	324.719	359.313	300.892	-0.0509511	8.17585	0.18499	0.668181	1
CG10435	27.7067	36.8234	29.6591	39.0873	33.5442	25.9372	29.5857	36.2719	28.2393	28.6685	0.163411	4.95877	2.14124	0.146983	0.908739
CG10440	36.4431	36.6761	45.8369	42.3201	33.5442	43.1455	37.7393	35.5316	36.8796	42.1148	-0.00274121	5.22692	0.000848565	0.976827	1
CG10444	81.1233	80.2749	115.94	72.2969	83.7744	87.2886	79.4388	67.362	78.6063	68.7536	0.189138	6.05944	2.37497	0.126916	0.908739
CG10445	0.49922	0.736467	1.1723	1.76334	0.516064	1.49638	1.63071	0.493495	1.26444	0.507407	-0.241277	0.7218	0.242097	0.623932	1
CG10459	0	0.44188	0.11723	0.58778	0.516064	0.498792	1.16479	0.493495	1.0537	1.01481	-1.33625	0.120563	4.59943	0.0347651	0.7106
CG10462	41.1857	40.9476	39.8581	39.3812	36.9846	47.6346	36.1086	34.7914	36.8796	37.0407	0.0439472	5.08498	0.159672	0.690436	1
CG10463	5.49142	3.82963	4.10304	4.70224	4.30054	3.74094	4.42621	5.67519	5.05778	4.31296	-0.0707328	2.57287	0.108075	0.743135	1
CG10465	40.9361	46.5447	65.5315	41.7324	47.6499	66.8381	55.2112	52.5572	57.5322	61.1425	-0.264705	5.92573	5.11987	0.0261383	0.658322
CG10466	5.24181	4.5661	5.04088	5.8778	4.98862	3.49154	5.12509	4.44145	4.42556	3.55185	0.273361	2.41575	1.93551	0.188158	0.908739
CG10467	10.9828	10.3105	11.8402	11.1678	12.3855	10.9734	10.7161	10.6101	11.38	12.9389	0.00414113	3.4847	0.000787788	0.977672	1
CG10469	4.49298	3.68234	5.62703	6.46558	4.98862	4.48913	2.32958	5.92194	5.05778	5.58147	0.10245	2.11166	0.209807	0.648058	1
CG10470	15.975	19.1482	21.3358	17.9273	22.5348	24.6902	18.4037	17.0256	17.913	12.6852	0.104293	4.40374	0.632018	0.428775	1
CG10472	4.24337	3.24046	4.57196	6.17169	4.64458	4.98792	5.35805	4.44145	3.79333	4.31296	-0.0234257	2.56379	0.00570183	0.939982	1
CG10474	0	0	0	0	0	0	0	0	0	0	0	-1.29821	0	1	1
CG10476	0	0	0	0	0	0	0	0	0	0	0	-1.30545	0	1	1
CG10477	0	0	0	0	0.172021	0.249396	0	0	0	0	-0.269503	-0.229619	0.0324737	0.857569	1
CG10479	24.4618	31.6681	18.5223	27.9195	34.7483	19.2035	20.7333	31.8304	23.603	25.8777	0.177637	4.79414	1.86701	0.175332	0.908739
CG10481	0	0	0	0	0	0	0	0	0	0	0	-1.29879	0	1	1
CG10483	47.6755	48.7541	55.6842	53.1941	50.0582	55.6153	59.6374	61.9336	58.5859	55.561	-0.18936	5.55017	5.8506	0.0176513	0.594602
CG10486	0	0	0.11723	0	0.172021	0	0.232958	0	0	0.253703	-0.36547	-1.05922	0.103196	0.760928	1
CG10492	63.1514	60.0957	57.7943	69.0641	55.2189	52.1237	56.6089	60.6998	61.9578	62.1573	0.0528985	5.85315	0.432208	0.611393	1
CG10494	6.24025	8.10114	4.92365	7.05336	7.2249	3.24215	4.89213	6.41543	6.32222	5.32777	0.343935	3.01404	2.86071	0.0943398	0.876277
CG10495	5.24181	4.5661	4.3375	3.23279	5.67671	4.48913	5.12509	4.44145	4.00407	4.56666	0.0382512	2.47323	0.0244961	0.875991	1
CG10505	0.24961	0.883761	1.40676	0.881669	0.172021	0.498792	0.465917	1.48048	0.632222	1.01481	-0.0671765	1.53812	0.024214	0.993594	1
CG10508	124.805	98.6866	108.32	103.449	115.426	106.741	117.644	120.413	106.213	113.152	-0.0354074	6.89505	0.28422	0.595305	1
CG10510	0	0	0	0	0	0	0	0	0	0	0	-1.23652	0	1	1
CG10512	39.688	45.8083	50.6433	46.7285	40.425	51.3756	44.4951	38.2458	40.673	43.637	0.0347681	5.52364	0.0512169	0.821489	1
CG10513	63.401	48.7541	54.1602	52.9002	58.1433	59.855	51.4838	52.0637	57.743	38.5629	0.0925219	4.63784	0.395695	0.530966	1
CG10514	12.2309	9.57408	14.1848	12.3434	12.3855	18.7047	17.2389	13.0776	15.8056	12.6852	-0.351624	2.9165	3.71858	0.0570649	0.804465
CG10516	12.9797	15.9077	14.8882	13.8128	13.7617	10.9734	11.415	16.0386	12.8552	10.1481	0.220938	3.85536	1.01873	0.315614	0.967131
CG10527	267.832	313.441	333.636	260.974	302.758	315.735	253.692	261.552	278.178	283.64	0.087554	7.74114	0.778896	0.379906	1
CG10543	96.0999	90.8801	68.2278	85.8158	88.247	65.8405	86.1946	97.9587	91.883	94.1239	-0.0251533	6.5047	0.0605138	0.806264	1
CG10550	167.488	169.682	174.086	166.636	188.363	158.865	136.514	184.814	157.002	147.402	0.143385	7.29341	3.02716	0.0854107	0.850958
CG10553	12.7301	23.7142	25.4389	20.5723	15.654	13.4674	10.4831	16.5321	15.1733	11.4167	0.560801	4.06222	6.09221	0.0155305	0.561077
CG10555	42.6833	46.1029	43.6095	39.3812	41.8012	39.1552	47.5235	37.2588	36.2474	37.0407	0.117408	5.34073	1.38292	0.242805	0.948688
CG10559	1.24805	2.3567	4.10304	1.17556	2.06426	3.49154	3.49438	3.70121	2.73963	3.29814	-0.520505	1.32977	3.60766	0.100041	0.897254
CG10560	25.9594	36.8234	44.7818	44.3774	44.2095	33.1697	26.5573	31.3369	26.7641	19.0278	0.522449	4.82432	9.22446	0.00314981	0.306623
CG10561	64.8986	64.0727	56.8565	59.9535	59.5194	58.608	54.2793	59.2194	54.1604	58.6055	0.0994464	5.74887	1.28124	0.260773	0.948688
CG10562	8.73635	11.9308	15.9433	10.2861	9.80522	13.218	13.9775	11.3504	13.4874	12.1778	-0.156693	3.6514	1.07313	0.414808	1
CG10565	75.6319	80.4222	39.272	86.6975	73.1091	49.3804	53.3475	77.4787	63.2222	57.8444	0.228937	6.22722	2.44087	0.121834	0.908739
CG10566	30.702	34.9086	30.4798	49.3735	34.4043	33.4191	31.2164	46.1417	36.0367	39.324	-0.0587153	5.18292	0.206176	0.65091	1
CG10570	0	0	0	0	0	0	0	0	0	0	0	-1.30545	0	1	1
CG10576	64.3994	73.9413	46.0713	77.5869	88.7631	44.3925	57.7737	68.8425	70.8089	60.1277	0.211252	6.33279	2.06844	0.153955	0.908739
CG10581	4.9922	5.74445	3.51689	7.64114	6.88086	3.99033	5.12509	7.40242	5.69	5.07407	0.0496231	2.43318	0.0572633	0.958818	1
CG10584	12.4805	15.0239	11.0196	9.11058	11.6975	13.7168	15.8412	8.63616	10.1156	12.9389	-0.0338836	3.79373	0.0651342	0.899772	1
CG10585	37.4415	30.4897	32.8243	31.7401	38.3608	33.4191	31.9153	37.2588	31.6111	29.1759	0.0636715	4.94229	0.473534	0.493193	1
CG10587	0	0	0	0	0	0	0	0	0	0	0	-1.30545	0	1	1
CG10588	0	0	0	0	0	0	0	0	0.210741	0	-1.51452	-1.20137	2.27713	0.19043	0.908739
CG10589	0	0	0	0	0.172021	0	0	0	0	0	1.26143	-1.25546	1.4495	0.293262	0.948688
CG10590	38.9392	38.5909	46.423	38.7935	38.5328	39.654	43.5632	38.7393	42.9911	45.1592	-0.0588191	5.34357	0.472946	0.564589	1
CG10591	0	0	0	0	0	0	0	0	0	0	0	-1.1336	0	1	1
CG10592	0	0	0	0	0	0	0	0	0	0	0	-0.567114	0	1	1
CG10597	0	0	0.11723	0	0	0	0	0	0	0	1.21981	-1.22699	1.43923	0.293262	0.948688
CG10598	0	0.294587	0	0	0	0	0	0	0	0	1.89824	-1.27041	2.72697	0.137192	0.908739
CG10600	80.8737	85.4302	67.7588	89.0486	79.99	64.0948	77.3422	86.6083	79.2385	77.6332	0.0636364	6.31957	0.516149	0.490976	1
CG10602	59.4072	71.5846	71.393	63.7741	65.7122	71.3272	64.9954	60.9466	66.8048	70.5295	-0.0087024	5.93946	0.0117104	0.914074	1
CG10616	26.7083	27.2493	26.2595	28.8012	32.34	24.1914	29.8187	26.8955	25.2889	29.4296	0.0591848	4.82261	0.3678	0.545782	1
CG10621	13.9782	63.9254	29.5419	32.6218	47.4779	7.98067	10.949	20.7268	36.6689	9.89443	1.11953	5.50022	6.75197	0.010994	0.498363
CG10623	36.1935	36.9707	26.6112	35.5607	28.2115	35.4142	28.6539	35.0381	28.0285	35.0111	0.00766045	4.96352	0.00579349	0.939502	1
CG10625	4.74259	2.94587	2.93075	3.52668	3.95649	4.73852	6.28988	2.46747	3.37185	2.79074	-0.142069	1.99888	0.266584	0.60694	1
CG10628	13.7286	11.7835	8.79224	9.40447	12.2135	9.47704	11.6479	14.8048	11.5907	10.4018	-0.0564257	3.69959	0.115877	0.734369	1
CG10631	217.91	192.365	186.747	188.089	183.891	172.333	208.032	180.619	194.514	213.111	4.12343e-05	7.34753	1.70936e-07	0.999671	1
CG10635	22.7145	22.9778	13.9503	29.0951	27.1794	13.9662	13.5116	19.493	18.7559	17.5055	0.460917	4.40328	7.52047	0.00740238	0.423369
CG10638	69.6412	60.9795	74.6754	60.5413	70.8728	82.3007	51.4838	60.9466	73.5485	71.2906	-0.0101453	5.41327	0.0080991	0.928498	1
CG10639	44.6802	41.3895	40.2098	41.1446	43.5214	42.6467	40.3018	41.947	39.1978	37.2944	0.0659387	5.31354	0.38948	0.534202	1
CG10646	9.73479	11.047	9.61284	7.93503	15.1379	12.7192	10.949	12.8309	10.537	8.87962	-0.0510327	3.50013	0.115796	0.775699	1
CG10650	3.99376	2.06211	3.16521	12.6373	3.44043	4.73852	9.31834	3.20772	10.9585	6.59629	-0.565168	2.11403	2.20608	0.141075	0.908739
CG10651	0	0	0.11723	0	0.172021	0	0	0	0	0	1.89027	-0.80652	2.56311	0.137192	0.908739
CG10654	28.9548	26.3655	19.9291	26.1562	34.9204	24.4408	25.3925	33.8044	23.603	25.1166	0.0388185	4.77213	0.103058	0.920932	1
CG10657	43.6818	57.0026	78.3095	41.4385	48.6821	76.5645	48.4554	66.1283	55.8463	59.3666	-0.173675	5.56239	1.40642	0.238874	0.948688
CG10659	0	0	0	0	0.172021	0	0	0	0	0	1.26123	-1.049	0.574794	0.454885	1
CG10660	16.2247	17.3806	22.7426	18.5151	19.0944	20.2011	14.6764	19.9865	18.5452	13.4463	0.120386	4.17812	0.965509	0.328522	0.97569
CG10663	6.24025	7.80655	6.91656	4.11446	6.02075	6.48429	4.89213	5.42844	5.05778	6.84999	0.142476	2.47793	0.342087	0.560138	1
CG10669	27.4571	24.3034	19.5774	21.7478	24.5991	17.9565	19.5685	22.9475	25.0782	22.8333	0.113352	4.45886	1.02761	0.33126	0.976869
CG10671	30.9517	38.2963	32.4727	27.6256	35.9525	30.9251	29.5857	35.7784	33.9293	28.6685	0.0631251	4.96172	0.426716	0.515324	1
CG10672	37.6911	45.9556	33.176	43.2018	46.7898	29.1793	32.3812	42.6873	39.83	33.9962	0.213208	5.34835	3.51169	0.0642871	0.804465
CG10674	13.4789	11.9308	12.778	14.4006	13.5897	16.4601	12.3468	10.8569	11.1693	9.13332	0.136081	3.7177	0.951408	0.33206	0.977102
CG10680	128.05	89.4071	66.9382	72.2969	74.8293	88.7849	148.86	63.1673	122.44	102.75	-0.290711	6.96691	0.600815	0.440365	1
CG10681	7.4883	8.54302	6.33041	10.8739	9.46118	11.2228	6.05692	7.89591	10.1156	7.6111	-0.0257255	3.07187	0.0173082	0.895635	1
CG10688	9.9844	11.047	13.247	12.3434	13.7617	9.97584	13.9775	14.5581	14.5411	10.6555	-0.0742161	3.81924	0.238996	0.62616	1
CG10694	0	0	0.351689	0	0	0	0.232958	0	0	0	0.75406	-1.1271	0.42755	0.515426	1
CG10700	0	0	0.11723	0	0	0	0.232958	0	0	0	-0.304333	-1.19658	0.0734634	0.829654	1
CG10702	45.9283	45.2191	45.0162	44.9651	55.907	37.6588	42.8644	47.1287	39.83	36.5333	0.216955	5.29193	4.76675	0.0317016	0.687568
CG10710	6.73947	8.10114	5.5098	5.8778	7.05288	5.9855	7.45467	8.8829	7.37593	7.3574	-0.151505	2.62807	0.542132	0.463527	1
CG10713	30.702	24.0088	28.6041	26.1562	27.6955	25.189	28.6539	23.6877	22.76	28.1611	0.0942886	4.74892	0.746061	0.390096	1
CG10721	19.9688	13.9929	15.9433	16.1639	21.6747	20.2011	17.9378	19.9865	18.5452	14.2074	-0.0557487	4.28273	0.192187	0.662187	1
CG10725	0.49922	0	0	0	0	0	0	0	0	0	1.98576	-1.13901	1.73003	0.19535	0.910015
CG10730	0.49922	0	0.586149	0.58778	0.516064	0.249396	0.465917	0	0.210741	0.507407	0.53438	-0.481186	0.52448	0.470876	1
CG10731	4.74259	7.51197	6.91656	7.93503	9.97724	7.48188	7.92059	10.6101	6.32222	5.58147	-0.0220017	3.37365	0.0185721	0.940798	1
CG10732	114.321	141.696	86.1639	116.968	120.243	111.48	103.434	117.698	97.9945	125.329	0.059348	6.58014	0.312315	0.577696	1
CG10734	0	0.294587	0.11723	0	0.172021	0.249396	0.232958	0	0	0	0.417995	-1.01926	0.163396	0.687139	1
CG10737	358.19	395.63	364.819	325.042	334.926	414.496	378.325	338.537	324.541	341.992	-0.0149956	8.2595	0.0344181	0.853251	1
CG10738	8.73635	7.95385	11.1368	9.40447	7.91299	10.4746	8.85242	10.6101	11.5907	10.9092	-0.211441	3.31074	1.48025	0.227019	0.945224
CG1074	13.9782	16.3496	14.8882	18.8089	13.9337	12.9686	19.1026	17.2723	17.07	15.9833	-0.0877519	4.17683	0.502722	0.480198	1
CG10747	31.9501	30.9316	32.2382	30.5645	26.6633	35.6636	31.6824	28.1292	26.1319	27.9074	0.0280394	4.95873	0.0774153	0.78149	1
CG10748	0	0	0	0	0	0	0	0	0	0	0	-1.29811	0	1	1
CG10749	0	0	0	0	0	0	0.232958	0	0	0	-1.5243	-1.29809	2.20837	0.19043	0.908739
CG10750	0	0	0	0	0	0	0	0	0	0	0	-1.24678	0	1	1
CG10752	0.24961	0.44188	0	0.29389	0	0.249396	0	0	0	0	1.50181	-0.90431	1.76292	0.18936	0.908739
CG10754	17.7223	13.551	15.2399	12.6373	15.1379	11.7216	10.7161	14.5581	15.3841	12.9389	0.184078	3.9491	2.28849	0.133954	0.908739
CG10761	0	0	0	0	0	0	0	0	0	0	0	-1.2705	0	1	1
CG10764	0.74883	0.294587	0.11723	0	0	0.748188	0.232958	0	0.210741	0.507407	-0.573145	-0.560838	0.364723	0.547463	1
CG1077	0.24961	0.147293	0.11723	0.58778	0.344043	0.249396	0.698875	0.986989	0.421482	0	-0.817028	-0.519662	0.929846	0.33757	0.980666
CG10777	146.272	141.844	156.033	141.655	128.672	141.657	165.866	123.374	136.139	159.833	-0.02439	7.35355	0.0507213	0.82234	1
CG10778	12.7301	9.72137	12.778	13.5189	10.3213	9.22765	12.1138	14.8048	15.8056	13.4463	-0.159763	4.35681	1.74698	0.189714	0.908739
CG10793	0	0.294587	0.11723	0	0	0.249396	0.232958	0.246747	0.210741	0.253703	-1.05726	-0.814787	1.0429	0.310424	0.962952
CG10795	13.2293	12.2254	15.3571	17.6334	13.7617	18.4553	12.8127	14.0646	15.8056	13.1926	-0.0491471	3.86211	0.134454	0.714746	1
CG10799	72.6365	30.4897	11.0196	23.2173	45.2416	15.2132	28.8869	26.402	41.0944	20.55	0.439407	5.33231	1.09334	0.298623	0.952472
CG10801	0.24961	0.147293	0.11723	0	0	0.249396	0	0	0	0	0.830865	-1.17312	0.524027	0.472187	1
CG10802	27.7067	29.9006	27.4318	29.9768	33.8882	33.4191	30.9835	33.3109	31.8219	27.1463	-0.0737229	4.93304	0.616933	0.434319	1
CG10803	40.6864	34.7613	35.4034	27.9195	25.1151	32.6709	31.4494	24.6747	37.0904	32.9814	0.0447149	5.38595	0.149023	0.700411	1
CG10804	104.587	88.0815	135.635	105.8	94.0957	115.72	117.644	93.0237	105.792	118.479	-0.0586211	6.64613	0.412857	0.522209	1
CG10809	21.2169	18.4117	16.5294	18.5151	16.342	15.2132	15.6082	18.0126	17.4915	17.2518	0.115708	4.15883	0.899218	0.355235	0.996857
CG10814	1.24805	0	0.11723	0	0.688086	0.249396	0.698875	0.246747	0.632222	0.253703	-0.175687	0.238209	0.0258226	0.872744	1
CG10822	0	0	0	0	0	0	0	0	0	0	0	-1.29814	0	1	1
CG10824	12.2309	14.5821	14.771	12.9312	12.0415	12.9686	15.6082	11.3504	13.2767	12.1778	0.031985	3.95397	0.023944	0.877385	1
CG10827	0.74883	0.147293	0	0	0.344043	0	0	0	0.210741	0.76111	0.197139	-0.389113	0.0421671	0.837829	1
CG10830	241.123	225.654	292.488	217.772	226.036	240.916	260.215	234.163	248.674	301.4	-0.0942952	7.93137	1.03444	0.311933	0.964448
CG10834	0	0	0	0	0	0	0	0	0	0	0	-1.25523	0	1	1
CG10839	0	0	0	0	0	0	0	0	0	0	0	-1.29797	0	1	1
CG10841	0	0.294587	0	0.29389	0	0.249396	0	0	0	0	0.86269	-1.03977	0.555256	0.46687	1
CG10845	0	0	0	0	0	0	0	0	0	0	0	-1.29087	0	1	1
CG10853	0	0	0	0	0	0	0	0	0	0	0	-1.27038	0	1	1
CG10859	0	0.44188	0.11723	0	0	0	0	0	0.210741	0	1.14384	-1.16224	1.22013	0.28807	0.948688
CG10862	0	0	0	0.29389	0.172021	0	0	0	0	0	1.96751	-1.22587	2.34066	0.137192	0.908739
CG10863	143.027	184.411	159.55	185.151	197.309	140.909	155.616	183.333	178.497	136.239	0.129654	7.43044	1.70726	0.194778	0.910015
CG10864	2.4961	3.68234	4.10304	2.35112	2.23628	4.23973	2.7955	2.46747	4.21482	3.55185	-0.179705	1.66144	0.542509	0.591569	1
CG10866	20.2184	16.9387	23.446	13.8128	13.7617	21.9468	20.7333	18.0126	23.603	22.8333	-0.269695	4.27847	4.10683	0.0457665	0.7694
CG10869	0.24961	1.47293	0.703379	0.58778	1.20415	1.24698	1.39775	0.986989	0.421482	2.02963	-0.431062	0.639035	0.819203	0.367908	1
CG10874	21.4665	26.5128	16.9983	23.5112	24.255	20.2011	25.6254	22.7008	21.917	26.6389	-0.0577275	4.74364	0.321061	0.572427	1
CG10877	3.24493	2.50399	2.57906	3.52668	2.92436	3.99033	2.32958	4.44145	3.58259	3.29814	-0.276408	1.88279	1.07277	0.303184	0.956724
CG10880	6.73947	7.07009	5.86149	3.52668	6.53682	5.9855	6.05692	6.16868	6.53296	5.32777	0.00184439	2.7144	8.03459e-05	0.992869	1
CG10881	0	0.147293	0	0	0	0	0	0	0	0	1.24584	-1.24817	1.41108	0.293262	0.948688
CG10887	0	0	0	0	0	0	0.232958	0	0.210741	0	-2.23865	-1.22075	4.51481	0.0640774	0.804465
CG10889	3.49454	4.86068	4.3375	5.29002	3.44043	3.99033	3.72734	4.1947	4.42556	2.53703	0.173009	2.30129	0.547088	0.461497	1
CG10898	17.9719	22.094	19.1085	20.2784	22.8789	21.448	23.9947	23.6877	20.0204	22.3259	-0.119952	4.3067	1.24539	0.267502	0.948688
CG10899	0	0	0.23446	0	0	0	0	0.246747	0	0	0.321796	-1.19973	0.0888994	0.76689	1
CG1090	347.956	305.929	456.493	288.6	299.833	367.36	382.984	273.396	326.016	377.003	-0.0223499	8.09805	0.0500728	0.82346	1
CG10903	9.48518	9.57408	9.96453	7.05336	11.6975	8.97825	7.45467	8.14266	9.48333	7.3574	0.21743	3.18555	1.76126	0.187933	0.908739
CG10904	9.48518	7.95385	8.44055	8.5228	10.6653	6.48429	10.0172	12.3374	12.8552	9.89443	-0.20121	3.38632	1.70646	0.194881	0.910015
CG10907	8.98596	8.39573	7.8544	7.93503	8.42905	5.48671	9.5513	11.1036	10.1156	8.11851	-0.0986203	3.32963	0.276252	0.600503	1
CG10909	0	0	0	0	0	0	0	0	0	0	0	-1.27631	0	1	1
CG1091	44.181	38.0017	40.796	42.9079	42.1453	48.8816	45.4269	45.1548	44.4663	38.3092	-0.0980219	5.39716	1.45445	0.231079	0.948688
CG10910	0	0	0	0	0	0	0	0	0	0	0	-0.303139	0	1	1
CG10911	0	0.147293	0.11723	0	0.516064	0	0	0	0	0	2.98067	1.63504	0.810504	0.37139	1
CG10912	0	0	0	0	0	0	0	0	0.210741	0	-1.51805	0.0356266	0.677797	0.413096	1
CG10914	9.23557	7.65926	8.44055	5.8778	7.91299	8.47946	8.38651	10.1166	7.58667	7.3574	-0.0893868	3.03025	0.306127	0.616306	1
CG10915	90.3589	84.841	87.9224	84.0525	82.7423	86.7898	81.0696	95.9847	80.0815	92.6017	-0.0215015	6.46061	0.0742558	0.785883	1
CG10916	22.7145	15.1712	17.5845	23.5112	17.5462	15.7119	17.2389	14.3113	16.8593	14.9685	0.269476	4.06629	4.77146	0.0319502	0.688568
CG10918	0	0.147293	1.1723	0	0.172021	0.498792	0.465917	0.493495	1.0537	0.253703	-0.568316	-0.246781	0.640536	0.425692	1
CG10919	0	0.589174	0.468919	0	0.344043	0.498792	0.465917	0	0.210741	0	0.417079	-0.87661	0.250131	0.618303	1
CG1092	16.4743	19.4427	20.6324	14.6945	17.2021	11.7216	12.1138	16.5321	23.603	12.1778	0.221348	4.15709	1.50635	0.223001	0.940938
CG10920	0.24961	0.147293	0	0	0	0	0	0	0	0	1.94228	-1.27055	2.65706	0.137192	0.908739
CG10924	15.4758	16.4969	9.8473	10.2861	15.998	12.4698	17.9378	11.5971	13.9089	12.1778	-0.000261061	4.60565	1.02164e-06	0.999196	1
CG10927	2.4961	2.06211	1.28953	1.46945	2.75234	1.24698	2.7955	3.94796	2.10741	0.76111	-0.121778	1.4439	0.111911	0.738783	1
CG10931	0	0	0	0	0	0	0	0	0	0	0	-1.22248	0	1	1
CG10932	16.4743	20.9157	20.5152	22.9234	15.654	17.9565	24.2277	18.506	21.7063	14.7148	-0.0138733	4.52872	0.00673364	0.934788	1
CG10933	3.24493	2.65128	3.39966	1.76334	3.78447	3.24215	3.02846	2.96097	2.95037	4.31296	-0.122029	1.86578	0.217024	0.701944	1
CG10934	0.24961	0	0	0.29389	0.172021	0	0.232958	0.246747	0	0.507407	-0.654997	-0.992387	0.489539	0.486293	1
CG10936	6.73947	8.9849	9.37839	10.58	8.94512	11.4722	6.7558	9.86989	10.7478	7.3574	-0.0505491	3.6398	0.0433822	0.835493	1
CG10943	0.49922	0.147293	0	0	0	0	0	0	0	0	2.42344	-0.918926	3.08722	0.0834661	0.846657
CG10947	61.4041	74.6778	58.6149	48.7857	60.8956	82.55	64.5295	64.6478	59.8504	70.0221	-0.161096	5.89156	1.60596	0.208436	0.924137
CG10948	87.3635	89.1126	71.2757	90.2242	95.816	71.0778	92.2516	93.5172	77.3419	82.961	0.0546497	6.39119	0.373959	0.542446	1
CG10949	9.48518	13.551	7.26825	12.6373	15.3099	7.23248	9.78426	13.5711	10.7478	11.9241	0.122736	3.62542	0.447726	0.505185	1
CG10950	0	0.147293	0.23446	0	0	0	0.232958	0	0.210741	0	0.0611403	-1.07618	0.00424121	0.948268	1
CG10953	0	1.17835	0	0	0.688086	0	0	0	0	0	4.09698	-1.12979	9.46383	0.00348284	0.31411
CG10958	10.9828	12.0781	7.61994	10.58	11.1814	6.98309	9.31834	8.38941	13.0659	9.38702	0.13858	3.46654	0.694114	0.453251	1
CG10959	3.99376	4.27151	2.81352	7.05336	4.64458	5.23731	3.72734	6.16868	4.6363	4.05925	-0.105545	2.2222	0.171065	0.680183	1
CG10960	185.211	167.031	229.653	201.902	192.836	205.003	221.776	145.828	178.919	186.218	0.0589413	7.48649	0.336282	0.563479	1
CG10962	0.99844	3.53504	0.820609	0.881669	4.30054	0.997584	1.16479	0.986989	2.31815	1.77592	0.568025	1.60197	1.30538	0.256361	0.948688
CG10969	0	0	0.23446	0	0	0	0	0	0	0	1.85067	-1.27012	2.71823	0.137192	0.908739
CG10970	0.74883	0.294587	0.820609	0.58778	0.516064	0	0.232958	0.246747	0.421482	0.76111	0.786959	-0.434121	1.27985	0.26103	0.948688
CG10973	16.9735	17.9698	20.2808	17.6334	18.7503	19.7023	17.7048	15.7918	19.1774	19.5352	0.000390598	4.05957	9.15392e-06	0.997593	1
CG10979	36.4431	34.1721	31.6521	34.9729	33.8882	35.1648	37.0404	36.2719	41.9374	38.0555	-0.143297	5.66595	3.23379	0.0755951	0.814742
CG10984	51.6693	68.7861	51.1122	69.0641	68.6366	49.131	48.9213	71.8035	52.8959	58.6055	0.13571	5.93901	1.48299	0.226594	0.944255
CG10993	0	0.147293	0.11723	0	0	0	0	0	0	0	1.87517	-1.14461	2.80668	0.137192	0.908739
CG10996	0	0	0	0	0	0	0	0	0	0	0	-1.18168	0	1	1
CG11000	222.652	214.165	253.099	205.135	222.768	219.718	221.544	207.021	217.274	235.183	0.023124	7.70337	0.0632585	0.80201	1
CG11007	21.9657	19.2954	18.6395	17.6334	11.8695	20.4505	15.1423	13.0776	16.8593	24.3555	-0.00909564	4.07638	0.00400885	0.94966	1
CG11018	0	0	0	0	0	0	0	0	0	0	0	-1.30545	0	1	1
CG11023	0.49922	0.147293	0.23446	0	0.172021	0	0	0	0	0	3.22221	-0.982514	6.21442	0.0153044	0.558527
CG11029	0.49922	0.736467	1.40676	0.881669	0.688086	0.498792	0.698875	0	0.842963	0	1.00416	0.193556	2.32544	0.130894	0.908739
CG1103	9.48518	10.3105	18.2879	11.1678	8.94512	22.1962	13.2786	11.1036	13.4874	16.4907	-0.370126	3.66931	4.18065	0.0439043	0.761812
CG11030	29.2044	28.7222	25.0872	25.2745	26.8353	23.1938	32.1483	26.1552	24.6567	29.937	-0.0103605	5.29467	0.0070132	0.933451	1
CG11034	4.49298	4.12422	5.04088	4.70224	5.50469	6.48429	4.19325	3.20772	3.79333	4.82036	0.0924462	2.48689	0.0672821	0.795947	1
CG11035	11.9813	18.1171	9.14393	15.2823	20.9866	12.9686	17.2389	19.9865	12.6444	16.4907	-0.0709497	3.93979	0.207353	0.649982	1
CG11037	0	0	0	0	0	0	0	0	0	0	0	-1.29789	0	1	1
CG1104	48.1747	44.9245	36.4585	47.904	49.3702	35.6636	45.6599	53.0507	45.0985	44.6518	0.0123052	5.56914	0.0116388	0.914336	1
CG11041	0.24961	0.883761	0	0.29389	0.344043	1.24698	0	0.246747	0	1.01481	-0.418905	0.775977	0.387824	0.535071	1
CG11043	0.24961	1.03105	0.586149	0.881669	1.20415	0.498792	0.931834	0.246747	0.632222	1.01481	0.259051	-0.236393	0.171081	0.680169	1
CG11044	23.2137	27.102	21.1014	19.6906	18.2343	27.4336	22.1311	22.7008	16.6485	17.7592	0.0411672	4.44404	0.0585392	0.809388	1
CG1105	44.9298	45.5137	58.2632	42.0262	49.5422	60.6032	50.0861	51.3234	52.053	52.7703	-0.144861	5.52951	2.29233	0.133632	0.908739
CG11050	216.911	209.599	167.404	224.238	208.662	201.512	205.003	272.409	204.419	227.318	-0.114464	7.80562	1.61375	0.207346	0.921434
CG11052	23.9626	25.1872	31.5348	21.454	24.083	23.1938	23.7618	20.2333	24.6567	26.3851	0.103134	3.9357	0.397914	0.529819	1
CG11060	0.24961	0.147293	0.11723	0	0.344043	0.249396	0.232958	0.493495	0	0.253703	-0.400195	-0.778603	0.186668	0.666772	1
CG11068	0	0.589174	0.11723	0	0.516064	0	0	0.493495	0	0.253703	0.816005	-0.660841	0.816182	0.368908	1
CG11069	9.9844	11.7835	13.7159	11.7556	9.46118	13.4674	11.182	7.64917	11.38	11.4167	0.0486815	3.21854	0.0994315	0.753267	1
CG11070	55.6631	59.0647	53.2223	56.133	59.1754	53.1213	56.8419	54.5312	52.2637	58.8592	0.039751	5.78004	0.316866	0.574942	1
CG11073	190.702	243.771	211.014	265.676	241.174	188.543	184.27	230.709	197.253	191.8	0.214914	7.57056	4.99241	0.0280165	0.666304
CG11076	54.1654	57.739	52.7534	68.1824	62.7878	57.6105	59.6374	64.4011	60.6933	60.8888	-0.0398458	6.03904	0.23234	0.631002	1
CG11077	32.4493	31.8154	46.423	29.6829	35.6084	42.8961	38.6711	31.8304	31.4004	37.5481	-0.0405026	5.00976	0.0974989	0.782412	1
CG11085	5.74103	3.82963	4.22027	3.52668	4.47256	3.24215	5.591	3.94796	5.05778	3.04444	0.0486763	2.20716	0.0431487	0.893059	1
CG11089	206.677	83.6627	59.9044	107.858	82.2263	44.3925	58.9385	41.2068	54.3711	44.3981	1.13841	6.63662	8.01808	0.00575022	0.395819
CG1109	31.9501	32.5519	30.4798	29.9768	28.2115	23.1938	29.5857	29.6097	32.8756	29.1759	0.0831786	4.91145	0.587131	0.445601	1
CG11095	11.2325	11.3416	13.0125	9.99225	12.2135	14.7144	12.5798	9.86989	15.1733	12.6852	-0.161141	3.71223	1.12437	0.291908	0.948688
CG11099	219.657	191.629	219.337	197.2	194.384	230.691	211.06	184.567	182.712	194.59	0.0266845	7.37259	0.135348	0.713842	1
CG11103	13.4789	11.7835	11.4885	11.7556	9.6332	13.218	9.08538	10.3634	9.27259	12.1778	0.101281	3.49898	0.4659	0.496689	1
CG11106	0	0	0	0	0	0	0	0	0	0	0	-1.30545	0	1	1
CG11107	64.3994	54.6459	64.3592	67.3008	64.164	59.1068	61.734	54.7779	57.743	60.1277	0.0994821	5.84323	1.92203	0.169169	0.908739
CG11109	11.2325	7.51197	14.6537	10.2861	10.4933	10.2252	13.9775	10.3634	11.5907	12.4315	-0.105746	3.68931	0.57755	0.514912	1
CG11110	6.73947	10.4578	8.67501	10.8739	9.6332	9.72644	9.5513	11.3504	8.21889	9.38702	-0.0536992	3.31522	0.123954	0.725635	1
CG11112	0	0	0	0	0	0	0	0	0	0	0	-1.27047	0	1	1
CG11113	0	0	0	0	0	0	0	0	0	0	0	-1.29816	0	1	1
CG11122	152.262	141.107	105.507	131.663	127.124	95.5186	120.673	118.439	119.49	119.494	0.195117	6.83584	1.91952	0.169444	0.908739
CG11123	12.4805	15.3185	12.0747	15.2823	18.2343	9.72644	11.415	17.0256	16.227	13.9537	0.0991188	3.96146	0.519288	0.473073	1
CG11125	5.74103	6.48091	3.86858	6.17169	5.84873	5.23731	10.0172	6.16868	5.47926	9.13332	-0.371221	2.80898	2.55433	0.113611	0.908739
CG11127	22.4649	17.5279	17.5845	21.1601	23.739	20.2011	17.4719	21.7138	18.3344	19.5352	0.0689361	4.27053	0.328197	0.668433	1
CG1113	3.24493	3.97692	2.3446	4.11446	4.98862	4.48913	4.42621	5.18169	4.00407	3.55185	-0.22772	2.36141	0.87359	0.352545	0.994198
CG11131	0	0.147293	0	0	0	0.249396	0	0	0	0	-0.284358	-1.05894	0.0462064	0.830383	1
CG11134	6.98908	10.7524	5.86149	7.05336	10.1493	5.73611	6.7558	7.40242	7.58667	5.83518	0.295844	3.26588	1.5287	0.219628	0.93666
CG11137	63.1514	59.8012	85.3433	63.7741	64.336	79.8067	73.6149	57.2454	57.1107	66.724	0.0125123	5.98195	0.012255	0.912107	1
CG11138	110.827	97.0664	89.2119	83.7586	95.2999	81.3031	92.2516	97.9587	99.6804	103.765	0.00335903	6.67524	0.00135255	0.970747	1
CG11141	35.9439	30.3425	25.3216	28.2134	30.6198	28.6805	27.0232	29.1162	26.1319	22.8333	0.164706	4.77348	2.36556	0.127661	0.908739
CG11145	0	0.147293	0	0	0	0	0	0	0	0	1.2458	-1.27208	1.53357	0.293262	0.948688
CG11147	86.3651	113.269	140.09	103.155	105.793	116.717	104.365	105.114	98.4159	103.511	0.0594275	6.67314	0.295173	0.588311	1
CG11148	358.939	356.008	375.722	335.916	342.323	348.157	408.143	368.641	356.995	382.331	-0.0754534	8.44178	1.80094	0.183083	0.908739
CG11149	0	0	0	0	0	0	0	0	0	0	0	-1.0655	0	1	1
CG11151	57.1607	73.794	60.8423	69.6519	65.3682	57.1117	57.7737	60.2063	53.1067	52.2629	0.220983	6.06074	5.07323	0.0268097	0.659478
CG11155	524.93	479.735	880.982	412.034	431.946	897.077	780.877	483.625	639.809	777.601	-0.389444	9.20832	5.93153	0.0169089	0.587871
CG11158	9.73479	12.3727	9.96453	12.0495	8.94512	13.218	12.5798	9.86989	14.1196	7.8648	-0.127108	3.34803	0.520299	0.472644	1
CG11159	0.74883	0	0.23446	0.29389	0.688086	0	0.931834	0.246747	0	1.26852	-0.36444	-0.525429	0.217832	0.641861	1
CG1116	35.195	22.9778	39.5064	31.7401	36.4685	28.9299	25.3925	28.3759	28.8715	30.6981	0.222749	4.94012	4.80769	0.0309965	0.68449
CG11160	10.234	10.016	7.61994	7.34725	8.42905	10.2252	7.68763	10.6101	8.00815	9.13332	-0.0618192	3.23964	0.0647473	0.799743	1
CG11162	0	0.294587	0	0	0	0	0	0	0	0	1.89836	-1.23464	1.81836	0.18864	0.908739
CG11164	1.24805	0.883761	0.351689	0.881669	1.03213	0.997584	0.698875	0.246747	0.421482	1.26852	0.224127	0.679388	0.0970264	0.756171	1
CG11165	0	0	0	0	0	0	0	0	0	0	0	-1.29804	0	1	1
CG11168	25.4602	29.4587	25.6733	29.6829	23.911	28.6805	25.6254	29.1162	26.3426	26.1314	-0.0201208	4.80266	0.0474219	0.828121	1
CG11170	4.49298	4.27151	6.56487	3.23279	5.67671	5.73611	5.35805	5.67519	8.64037	5.32777	-0.315661	2.29598	2.19306	0.142239	0.908739
CG11178	20.468	17.8225	20.1635	18.5151	25.9752	16.9589	20.7333	18.9995	20.0204	19.0278	0.105747	4.46084	0.743422	0.390932	1
CG11180	5.74103	6.62821	3.63412	7.34725	8.77309	3.99033	6.28988	7.89591	8.21889	6.84999	-0.0753364	3.25645	0.119304	0.730623	1
CG11190	34.4462	31.0789	32.4727	37.0301	38.3608	34.4166	37.2734	36.2719	37.5119	32.9814	-0.0456745	5.15463	0.323514	0.570966	1
CG11191	31.4509	37.7071	23.7977	42.0262	38.5328	23.942	23.9947	39.9731	30.1359	27.9074	0.241222	5.03348	2.6845	0.104933	0.908739
CG11192	0	0	0	0	0	0	0	0	0	0	0	-1.26967	0	1	1
CG11200	25.2106	26.2182	32.9416	26.1562	27.5234	29.6781	23.7618	28.3759	25.7104	22.8333	0.0892444	4.73509	0.527538	0.46959	1
CG11208	31.7005	29.9006	33.5277	30.2707	34.0602	27.9323	32.3812	24.428	27.8178	30.9518	0.153838	4.95774	1.76472	0.187504	0.908739
CG11210	105.835	94.5624	128.367	81.9953	86.1827	102.502	89.2231	72.7905	78.3956	84.2295	0.222087	6.08668	5.15686	0.0256186	0.654998
CG11211	96.8487	147.883	201.635	76.9991	118.695	164.601	114.616	139.906	233.501	92.0943	-0.206388	7.53658	0.671998	0.414592	1
CG11221	25.2106	23.567	27.3145	19.6906	22.7068	34.4166	28.188	25.9085	28.6607	33.4888	-0.338109	4.6826	8.49436	0.00452638	0.358828
CG11226	0	0.147293	0.11723	0.29389	0	0	0	0	0	0.253703	0.83952	-0.652961	0.467735	0.495845	1
CG11227	0	0	0	0	0	0	0	0	0	0	0	-1.25466	0	1	1
CG11231	0	0	0	0	0	0	0	0.246747	0.210741	0.253703	-2.72985	-1.18828	5.63978	0.0233422	0.635903
CG11236	3.49454	9.57408	4.10304	5.8778	7.05288	3.24215	5.12509	6.66218	8.85111	2.79074	0.173833	3.56198	0.154602	0.695136	1
CG1124	134.54	128.44	239.032	105.213	123.511	249.645	158.878	173.217	165.01	152.476	-0.293304	7.18308	3.55719	0.0626176	0.804465
CG11241	24.4618	21.3576	21.4531	24.9806	23.0509	24.6902	22.597	19.493	25.9211	25.624	-0.0444298	4.75234	0.135545	0.713643	1
CG11247	71.1389	77.6237	73.3859	83.1708	84.2905	81.0537	83.8651	81.4266	82.3996	94.3776	-0.119443	6.35644	3.02204	0.0856707	0.850958
CG11248	37.1919	38.149	30.4798	41.1446	38.5328	25.9372	34.0119	39.4796	39.4085	39.8314	0.0479137	5.34136	0.182491	0.850751	1
CG11249	0	0.147293	0.23446	0	0.172021	0.249396	0	0	0	0.253703	0.392316	-0.852113	0.158618	0.691406	1
CG11251	0	0	0	0	0	0	0	0	0	0	0	-1.27043	0	1	1
CG11257	4.9922	6.62821	7.97163	8.22891	5.16064	7.23248	5.591	6.41543	5.26852	10.1481	-0.0612417	2.90357	0.0881328	0.839324	1
CG1126	0.49922	1.32564	0.468919	0.881669	0.860107	1.24698	1.63071	1.23374	0.842963	1.01481	-0.542605	0.674592	1.64055	0.203648	0.916196
CG11261	5.49142	3.38775	5.74426	3.23279	5.16064	6.2349	3.49438	5.92194	5.90074	4.56666	-0.167416	2.27929	0.42178	0.517758	1
CG11262	0	0	0	0	0	0	0	0	0	0	0	-1.26261	0	1	1
CG11263	0.24961	0.44188	1.05507	0	0.860107	0.249396	0.698875	0.986989	0.842963	0.253703	-0.0618585	0.312357	0.00895072	0.924843	1
CG11266	322.247	273.229	283.696	292.126	293.125	312.992	326.142	275.864	273.12	306.727	-0.0300115	8.19618	0.29006	0.591555	1
CG11267	46.6771	55.8242	66.9382	52.0185	68.6366	60.6032	50.552	54.2844	55.4248	58.0981	0.0627826	5.7783	0.307134	0.580863	1
CG11269	0	0	0.11723	0	0	0	0	0	0	0	1.21993	-1.20639	1.16653	0.293262	0.948688
CG11275	55.4134	55.8242	48.8848	45.8468	50.2303	54.3683	44.2621	48.3625	49.5241	47.4425	0.071788	5.42651	0.611949	0.436175	1
CG11279	12.2309	7.80655	11.723	9.40447	10.4933	12.9686	10.949	10.6101	15.3841	13.9537	-0.308209	3.80888	3.96032	0.0497185	0.797232
CG11284	38.9392	39.9165	39.9754	33.5034	40.425	41.6491	42.6314	47.1287	42.1482	45.1592	-0.177713	5.44402	3.18665	0.07772	0.823678
CG11286	0	0	0	0	0	0	0	0	0	0	0	-1.27728	0	1	1
CG11289	0.49922	0	0	0	0.344043	0	0	0.246747	0.210741	0	0.538524	-1.1019	0.24082	0.64774	1
CG1129	25.4602	23.567	25.7906	23.8051	23.2229	21.448	27.0232	25.6617	30.9789	23.087	-0.0752777	4.62812	0.6068	0.438105	1
CG11291	0	0	0	0	0	0	0	0.246747	0	0	-1.52953	-1.06033	1.90853	0.19043	0.908739
CG11294	7.73791	3.97692	4.57196	9.40447	6.02075	5.9855	4.42621	4.93495	7.16519	5.83518	0.10463	2.80185	0.260357	0.950039	1
CG11298	0	0	0	0	0	0	0	0	0	0	0	-1.30545	0	1	1
CG11300	0	0	0	0	0	0	0	0	0	0	0	-1.19243	0	1	1
CG11306	85.3667	82.4843	100.231	88.1669	88.419	93.5235	102.036	80.9331	96.73	93.6165	-0.0692975	6.46993	0.834174	0.363588	1
CG11307	10.9828	11.4889	14.5365	12.3434	10.6653	9.97584	13.9775	13.0776	11.1693	13.4463	-0.0311779	3.74506	0.0505174	0.96357	1
CG11309	34.6958	50.2271	38.5686	32.6218	45.9297	40.6515	39.8359	40.2198	42.7804	37.2944	0.0167658	5.61505	0.0133161	0.908397	1
CG11313	0	0	0	0	0	0	0	0	0	0	0	2.22878	0	1	1
CG11317	57.6599	61.1268	47.1264	69.358	68.6366	51.8744	55.91	66.6218	52.6852	60.8888	0.0738571	6.09997	0.590857	0.477567	1
CG11318	0.99844	1.32564	0.468919	0.881669	0.688086	1.74577	0.931834	0.740242	0.421482	0	0.165568	0.124643	0.088897	0.766294	1
CG11319	297.535	266.748	327.423	245.104	239.626	266.604	308.204	240.579	291.244	302.161	-0.032891	8.07234	0.09659	0.756703	1
CG11320	0.24961	0.589174	0.23446	0	0	0.997584	0	0.493495	0	0	-0.256948	-0.358179	0.076684	0.782498	1
CG11321	211.669	258.058	150.523	192.792	177.354	234.931	210.129	240.825	200.204	213.872	-0.151619	7.46038	1.7329	0.191491	0.909299
CG11322	0.49922	0.736467	0.703379	0.58778	0.172021	0.997584	0.232958	0	0.210741	0.253703	0.673078	-0.463695	0.763205	0.384728	1
CG11327	0	0.147293	0.11723	0.58778	0.172021	0.249396	0	0	0	0	1.50491	-0.96472	1.92326	0.176069	0.908739
CG11329	0.24961	0.44188	0.586149	0	0	0.249396	0.698875	0.246747	0.210741	0.507407	-0.333523	0.0700426	0.1703	0.680858	1
CG11333	0	0	0	0	0	0	0	0	0	0	0	-1.27627	0	1	1
CG11334	24.2122	25.3345	16.6466	17.6334	27.0074	24.4408	23.9947	27.1422	24.4459	26.6389	-0.190304	4.52922	1.77382	0.186382	0.908739
CG11337	14.727	13.2564	11.2541	8.22891	12.2135	10.4746	10.949	14.0646	11.1693	11.4167	0.0469011	3.69004	0.145308	0.703988	1
CG11340	0	0.147293	0.11723	0.29389	0	0.249396	0.465917	0	0.210741	0	-0.711493	-0.902667	0.417475	0.520068	1
CG11342	1.24805	1.91482	3.75135	1.46945	1.72021	2.49396	2.7955	1.97398	2.31815	2.02963	-0.127556	1.46224	0.148398	0.906294	1
CG11345	0	0.147293	0	0	0.172021	0	0.465917	0	0	0.507407	-1.18526	-0.937302	1.33171	0.252848	0.948688
CG11349	2.4961	3.97692	2.3446	1.46945	6.19277	3.74094	4.65917	6.16868	4.84704	1.52222	-0.322668	0.689378	0.58141	0.448026	1
CG11350	0	0	0.11723	0	0	0	0	0	0	0	1.22013	-1.17011	1.14188	0.293262	0.948688
CG11353	4.74259	5.00798	10.4335	10.2861	7.2249	4.73852	8.61946	3.94796	4.21482	3.04444	0.612529	2.87002	3.16538	0.0787005	0.827589
CG11356	0	0	0	0.29389	0	0	0.465917	0	0	0.507407	-1.79754	-0.869465	2.43283	0.122441	0.908739
CG11357	53.9158	47.2812	64.5936	50.2552	53.6707	56.1141	56.6089	51.3234	52.2637	57.0833	-0.0162677	5.7618	0.0422653	0.837594	1
CG1136	37.9407	47.7231	69.0484	38.4996	49.8862	63.596	47.2906	48.6092	51.21	51.2481	-0.095331	5.15406	0.456783	0.50092	1
CG11360	132.793	96.6245	170.335	93.1631	95.6439	139.911	151.19	88.3355	132.345	147.655	-0.160664	7.40139	0.612265	0.436057	1
CG11362	0	0.147293	0.351689	0.29389	0.172021	0.249396	0.232958	0	0	0.253703	0.439861	-1.01626	0.236142	0.62842	1
CG11367	14.727	13.1091	17.8189	12.6373	12.3855	19.9517	14.4434	13.3244	14.9626	16.237	-0.148518	3.82248	1.14995	0.28652	0.948688
CG11368	333.978	345.256	526.245	281.546	271.622	693.071	380.188	362.719	362.053	376.242	-0.303979	8.26512	3.51617	0.0641207	0.804465
CG11369	0	0	0	0	0	0	0	0	0	0	0	-1.27014	0	1	1
CG1137	0.74883	0.294587	0.23446	0.29389	0.344043	0	0	0	0.210741	0.507407	1.21144	-0.632264	1.82136	0.180646	0.908739
CG11370	3.24493	0.294587	4.3375	4.11446	0	0	0	0.246747	0.210741	0	4.30503	0.294008	9.74116	0.00244409	0.281509
CG11373	0	0	0	0	0	0	0	0	0	0	0	-1.29816	0	1	1
CG11374	6.98908	4.4188	9.0267	4.11446	2.92436	5.48671	7.92059	4.44145	5.90074	5.83518	-0.0868191	2.38155	0.122973	0.858159	1
CG11377	23.9626	23.567	21.4531	25.8623	26.6633	21.448	15.6082	24.1812	22.3385	22.3259	0.194511	4.61025	2.80156	0.097757	0.886277
CG11378	20.7176	25.3345	22.977	20.5723	29.5877	24.6902	29.5857	26.402	27.1856	24.6092	-0.145525	4.74913	1.63804	0.20399	0.916219
CG11379	0	0	0	0	0	0	0	0	0.210741	0	-1.51444	-1.24184	2.04168	0.19043	0.908739
CG1138	0	0	0	0	0	0	0	0	0	0.253703	-1.53218	-1.291	2.44189	0.19043	0.908739
CG11380	0.99844	1.32564	1.99291	1.46945	1.20415	0.997584	0.698875	1.48048	2.31815	1.77592	-0.0345118	1.05799	0.00773029	0.996069	1
CG11381	0.24961	0	0	0.29389	0	0	0	0	0	0	1.98522	-0.596603	2.41373	0.137192	0.908739
CG11382	0	0.147293	0	0	0	0.748188	0	0	0	0	-1.4966	-0.811252	1.28324	0.261325	0.948688
CG11384	0	0	0.23446	0	0	0	0	0.246747	0	0	0.322133	-1.16638	0.0741608	0.786468	1
CG11388	135.538	131.533	165.646	140.479	146.734	145.897	135.815	129.049	129.606	129.896	0.104296	6.85171	1.96483	0.164548	0.908739
CG1139	0	0	0.586149	0.29389	0.344043	0.249396	0	0.493495	0.421482	0.507407	-0.292189	-0.400082	0.117188	0.732928	1
CG11391	0	0.44188	22.3909	0	0.516064	1.24698	4.65917	0	0	0.253703	2.11749	2.83244	2.30015	0.13298	0.908739
CG11395	73.8846	74.9724	31.0659	48.4918	56.079	34.4166	57.7737	38.2458	74.6022	43.3833	0.18665	6.37588	0.232637	0.630784	1
CG11396	24.2122	23.7142	27.9007	24.099	25.4592	26.1866	23.7618	26.402	28.2393	33.2351	-0.132056	4.71742	1.60321	0.208822	0.924383
CG11398	5.24181	5.15527	7.38548	7.05336	6.70884	7.73127	4.89213	6.41543	7.16519	5.07407	0.0138067	2.80146	0.00606259	0.938116	1
CG11399	80.1248	64.0727	79.8335	62.3046	75.0014	90.0319	86.6606	74.2709	78.3956	83.7221	-0.191192	6.20105	4.76493	0.0317333	0.687568
CG11400	46.1779	36.5288	18.5223	25.8623	37.5007	21.6974	25.1595	21.467	41.7267	23.087	0.291586	5.27972	1.14636	0.287268	0.948688
CG11403	4.49298	2.3567	2.93075	2.9389	3.26841	1.24698	1.63071	3.20772	2.95037	3.55185	0.321126	1.95935	1.25933	0.26486	0.948688
CG11404	0.49922	0	0.351689	0	0.172021	0	0.232958	0.246747	0.210741	0.253703	0.116681	-0.826314	0.0151102	0.902451	1
CG11406	2.74571	2.79858	2.22737	1.46945	3.09639	5.73611	3.26142	0.986989	2.95037	2.79074	-0.327701	1.26252	1.19495	0.277344	0.948688
CG11407	48.4244	84.9883	92.0254	55.8391	67.9485	62.349	52.8816	60.4531	66.5941	58.3518	0.225813	5.66476	2.76627	0.0998617	0.897042
CG11409	2.24649	2.79858	3.63412	2.9389	2.23628	2.24456	1.39775	1.97398	1.47519	1.77592	0.658297	1.38374	3.49327	0.0649766	0.804465
CG11412	41.1857	47.8704	28.1352	45.259	37.3287	34.666	42.3984	48.3625	40.0407	37.5481	-0.0302833	5.46305	0.0608849	0.805683	1
CG11413	4.9922	6.18633	10.6679	5.58391	9.46118	5.9855	4.89213	9.86989	6.11148	9.13332	0.0733781	2.63717	0.0742267	0.785924	1
CG11414	56.9111	49.0487	36.9274	50.8429	50.2303	38.6564	50.0861	53.2974	52.4745	41.8611	0.0379853	5.71926	0.161358	0.784414	1
CG11417	3.74415	10.4578	2.11014	6.17169	5.84873	1.49638	3.96029	6.66218	6.53296	3.29814	0.351707	3.03368	0.953732	0.331473	0.976869
CG11418	11.9813	10.7524	11.0196	11.4617	13.5897	8.47946	11.6479	12.3374	11.8015	13.7	0.0184475	3.63914	0.0187676	0.942048	1
CG1142	10.234	12.5199	5.97872	10.8739	15.1379	5.9855	10.7161	13.5711	10.3263	10.4018	0.0919181	3.68731	0.218117	0.641644	1
CG11423	0.49922	0.294587	0.23446	0	0.172021	0.498792	0.232958	0	0.421482	0.76111	-0.590329	-0.497649	0.465905	0.496774	1
CG11425	35.195	9.86866	13.7159	13.225	14.1058	17.4577	19.1026	11.3504	14.9626	15.4759	0.103105	4.94032	0.14574	0.703569	1
CG11426	1889.55	2014.24	2296.88	1790.67	2147.86	2453.56	2334.48	2567.65	2533.31	2436.57	-0.281568	11.0573	5.7196	0.0189267	0.605329
CG1143	5.49142	11.047	6.09595	8.5228	8.60107	4.98792	6.98875	10.1166	5.90074	7.6111	0.167268	3.29229	0.693413	0.407281	1
CG11436	10.7332	9.1322	9.8473	9.69836	9.80522	11.4722	11.415	9.3764	9.90482	11.6704	-0.131257	3.39024	0.956135	0.330868	0.976263
CG11437	1.24805	1.17835	1.40676	1.17556	0.860107	1.49638	1.16479	0.986989	1.0537	0	0.31078	1.44443	0.553845	0.458752	1
CG11438	7.98752	10.3105	12.778	9.40447	10.4933	9.22765	11.415	10.8569	10.1156	4.82036	0.149189	3.76074	0.700277	0.404979	1
CG11444	33.947	38.8855	22.977	40.8507	41.9732	27.1842	23.9947	36.5186	34.3507	31.2055	0.212674	5.25013	2.52043	0.116	0.908739
CG11447	8.48674	9.72137	7.03379	5.29002	11.0094	11.4722	11.415	13.5711	6.95445	7.3574	-0.268642	3.43547	2.68094	0.105161	0.908739
CG11448	284.805	265.865	229.653	275.081	289.684	225.953	263.476	294.37	245.934	271.97	0.0466898	8.02675	0.432058	0.512713	1
CG11449	0.49922	1.17835	0.11723	0	0.688086	0.997584	0.698875	0.740242	1.0537	0	-0.417781	1.57752	0.665241	0.416939	1
CG11453	0.99844	1.62023	1.52399	1.17556	1.54819	1.49638	0.931834	0.493495	0.632222	0.507407	0.775274	0.899586	4.11175	0.0456399	0.7694
CG11454	13.4789	15.4658	13.5987	17.6334	16.6861	12.4698	13.9775	18.2593	14.9626	12.9389	0.0759595	3.96558	0.333309	0.592081	1
CG11455	128.799	166.147	176.079	133.426	148.971	172.083	136.281	147.061	135.506	129.135	0.0683534	6.98771	0.499415	0.481642	1
CG11456	21.9657	17.2333	24.0321	14.9884	16.17	23.4432	23.9947	15.7918	18.7559	17.2518	-0.0639218	4.31193	0.278624	0.741633	1
CG11458	92.855	189.714	214.648	93.1631	102.697	213.483	60.3363	97.7119	97.3622	116.45	0.253755	7.21074	0.688441	0.408961	1
CG11459	6.98908	1.47293	0.703379	0.881669	1.89224	0.748188	2.32958	0.740242	3.16111	3.80555	0.00931263	2.61929	5.95601e-05	0.99386	1
CG1146	57.4103	69.2279	53.3396	62.0108	62.9599	66.8381	69.4216	74.0242	56.2678	82.4536	-0.193624	5.86716	3.08567	0.0824963	0.844754
CG11470	0	0.147293	0	0	0	0	0	0.246747	0	0.253703	-1.01396	-1.10541	0.820971	0.398093	1
CG11474	39.9376	41.2422	40.0926	45.8468	43.8655	37.9082	34.7108	41.4536	43.6233	39.324	0.0961726	5.33623	1.09	0.299359	0.953454
CG11475	1.99688	1.91482	3.39966	2.64501	2.58032	1.49638	2.09663	1.72723	0.842963	0.76111	0.86208	1.17676	5.27135	0.0240781	0.640488
CG11486	238.627	238.321	269.629	213.07	222.596	270.345	297.721	231.202	238.137	268.672	-0.142678	7.95774	3.54333	0.0631212	0.804465
CG11498	9.9844	6.62821	6.91656	9.40447	10.3213	5.73611	6.52284	9.86989	5.90074	7.10369	0.286897	2.35922	2.02665	0.15813	0.908739
CG11504	21.9657	23.8615	12.6608	27.9195	23.739	14.7144	13.0457	21.2203	15.8056	13.1926	0.480872	4.45027	7.73702	0.00662974	0.404729
CG11505	204.181	183.97	213.358	161.933	162.216	189.292	193.356	169.515	179.762	213.365	-0.0291532	7.5563	0.0873321	0.768299	1
CG11509	9.73479	8.54302	8.67501	11.7556	6.53682	9.97584	7.22171	8.8829	8.42963	10.1481	0.00088433	3.3523	1.83296e-05	0.996594	1
CG11523	13.2293	16.7915	10.4335	12.3434	13.7617	8.47946	11.415	9.86989	16.227	12.6852	0.17639	3.8403	1.3442	0.249461	0.948688
CG11526	77.6287	81.4533	69.0484	78.4686	79.99	73.073	73.8478	78.4656	73.3378	72.0518	0.0593084	6.18239	0.681106	0.411459	1
CG11529	0.99844	1.17835	1.05507	0.881669	1.72021	0.498792	0.232958	0.493495	0.421482	0.253703	1.57854	1.39749	7.96717	0.00590005	0.401554
CG11534	21.9657	19.4427	20.398	18.8089	18.2343	17.7071	17.7048	22.9475	19.3882	18.2666	0.0415585	4.11005	0.116776	0.73338	1
CG11537	258.596	252.166	304.094	241.871	229.649	306.508	325.443	262.786	289.769	320.174	-0.225352	8.3748	10.0199	0.00213351	0.272234
CG11539	2.99532	3.82963	4.45473	4.11446	3.61245	3.99033	4.65917	4.6882	2.73963	3.29814	-0.0126849	2.20742	0.00323401	0.95478	1
CG11550	72.3869	81.7479	131.063	60.5413	65.1961	105.245	86.6606	89.816	94.2011	83.2147	-0.150349	6.09425	0.885595	0.349274	0.992196
CG11555	7.23869	7.36467	7.50271	9.40447	9.11714	3.74094	7.68763	10.3634	12.223	6.59629	-0.0179052	3.35254	0.00829345	0.927647	1
CG11560	13.9782	12.6672	10.9024	10.58	14.9659	12.7192	11.182	14.0646	11.5907	11.9241	0.0390875	3.66985	0.0772363	0.781736	1
CG11562	11.9813	12.5199	6.6821	12.6373	13.4177	7.23248	6.05692	12.5841	10.7478	11.1629	0.243686	3.45799	2.03416	0.157371	0.908739
CG11563	8.23713	9.27949	5.27534	8.81669	7.39692	8.97825	7.92059	7.40242	11.8015	7.10369	-0.171853	3.37861	0.676496	0.41304	1
CG11566	0	0	0	0	0	0	0	0	0	0	0	-1.30545	0	1	1
CG11570	0	0.147293	0.11723	0	0.172021	0	0	0	0	0	2.33363	-1.23573	4.67118	0.0687019	0.804465
CG11576	45.429	48.165	61.7801	47.6102	51.2624	54.3683	50.319	47.6222	47.4167	49.2185	0.0357099	5.55636	0.193172	0.661377	1
CG11577	33.1981	30.3425	30.597	31.1523	30.2758	29.4287	30.9835	29.6097	27.8178	36.5333	0.0104922	4.94699	0.0100934	0.92309	1
CG11581	0	0	0	0	0	0	0	0	0	0	0	-1.30545	0	1	1
CG11583	8.23713	9.27949	7.50271	7.34725	11.3534	8.47946	9.78426	11.1036	8.85111	8.11851	-0.0767793	3.45951	0.165335	0.685288	1
CG11584	0	0	0	0	0	0	0	0	0	0	0	-1.24103	0	1	1
CG11585	0.74883	1.03105	1.1723	0	0.688086	0.748188	1.16479	0.493495	0	0.507407	0.423676	-0.465457	0.343797	0.559234	1
CG11586	15.2262	21.063	13.1297	22.6295	18.4063	14.9638	17.2389	20.2333	17.913	12.9389	0.106698	4.39157	0.332234	0.565832	1
CG11588	0	0	0	0	0	0	0	0	0	0	0	-1.30545	0	1	1
CG11590	6.73947	11.047	9.61284	9.40447	7.74097	9.72644	7.92059	13.0776	8.21889	10.4018	-0.132091	3.29748	0.596145	0.464912	1
CG11593	53.4166	42.2732	47.1264	50.2552	45.7577	44.8913	44.2621	41.7003	46.5737	47.6962	0.0813569	5.54131	1.11799	0.33085	0.976263
CG11594	30.2028	49.4906	32.8243	40.5568	60.3795	20.9493	27.4891	38.7393	47.8382	28.1611	0.386821	5.86694	2.15159	0.146021	0.908739
CG11596	18.4711	17.5279	17.5845	19.1028	19.0944	19.7023	22.8299	17.7658	18.1237	19.2815	-0.0931704	4.46541	0.572669	0.451241	1
CG11597	6.24025	4.71339	7.15102	5.29002	6.53682	9.22765	9.31834	5.18169	5.69	6.08888	-0.235418	2.75985	1.32453	0.252928	0.948688
CG11598	0	0	0	0	0	0	0.465917	0	0	0	-2.24783	-1.18425	3.84879	0.0640775	0.804465
CG11600	0	0	0	0	0	0	0	0	0	0	0	-1.25488	0	1	1
CG11601	25.7098	20.4738	33.645	21.7478	23.0509	26.6854	29.1198	20.48	25.0782	28.1611	-0.0470662	4.69927	0.143762	0.956991	1
CG11608	0	0	0	0	0	0	0	0	0	0	0	-1.30545	0	1	1
CG1161	83.6194	91.322	81.123	89.0486	93.7517	89.0343	80.3707	90.803	86.193	81.9462	0.0348647	6.3586	0.176903	0.675084	1
CG11617	8.98596	12.2254	6.91656	10.8739	10.8374	10.4746	6.7558	13.5711	8.64037	9.13332	0.033223	3.28775	0.0381081	0.917453	1
CG11619	7.23869	7.51197	11.9574	10.2861	9.28916	11.4722	7.92059	6.41543	9.48333	11.4167	-0.003256	3.33613	0.00033708	0.985394	1
CG11626	1.99688	1.47293	2.81352	0.881669	1.03213	0.498792	1.63071	1.23374	1.68593	1.77592	0.309405	1.49975	0.981313	0.324617	0.97484
CG11629	0	0	0	0	0	0	0	0	0	0	0	-1.30545	0	1	1
CG11630	0	0	0	0	0	0	0	0.246747	0	0	-1.52959	-1.16048	2.18064	0.19043	0.908739
CG11634	0	0	0	0	0	0	0	0	0	0	0	-1.29804	0	1	1
CG11635	0.24961	0.147293	0.23446	0.29389	0	0.748188	0.232958	0	0	0.253703	-0.397332	-0.540043	0.146454	0.702879	1
CG11638	57.1607	50.8162	40.9132	49.9613	61.9277	43.8937	44.0292	53.2974	48.8919	50.487	0.113293	5.76561	0.851336	0.358721	1
CG11652	26.2091	26.8074	25.0872	25.5684	25.9752	20.2011	17.006	18.0126	14.5411	16.4907	0.589368	4.45438	28.2759	8.01982e-07	0.000745264
CG11655	19.22	20.0319	25.5561	19.1028	22.3628	25.4384	20.7333	18.0126	21.2848	17.7592	0.0508918	4.53852	0.172798	0.678659	1
CG11656	0	0	0	0	0	0	0	0	0	0	0	-1.16532	0	1	1
CG11658	102.59	98.2447	114.065	99.9225	100.461	119.959	111.354	112.023	99.8911	103.765	-0.0848959	6.61518	1.3119	0.255185	0.948688
CG11659	0	0	0	0	0	0	0	0	0	0	0	-1.2632	0	1	1
CG11663	0	0	0	0	0	0	0	0	0	0	0	-1.30545	0	1	1
CG11664	0	0	0	0	0	0	0	0	0	0	0	-1.30545	0	1	1
CG11665	110.078	100.012	187.802	99.6286	107.685	166.846	136.048	106.842	117.172	135.478	-0.124706	6.74813	1.25572	0.265541	0.948688
CG11666	0	0	0	0	0	0	0	0	0	0	0	-1.2982	0	1	1
CG11668	7.23869	7.80655	7.61994	7.34725	6.36479	7.48188	5.82396	8.14266	6.7437	6.34258	0.0784974	3.18321	0.156177	0.693666	1
CG11670	0	0	0	0	0	0	0	0	0	0	0	-1.26917	0	1	1
CG11671	0	0	0	0	0	0	0	0	0	0	0	-0.943543	0	1	1
CG11672	0	0	0	0	0	0	0	0	0.210741	0	-1.51681	-0.344313	0.455467	0.504162	1
CG11674	0	0.294587	0.468919	1.46945	0.344043	0.249396	0.232958	0	0.210741	0.507407	0.89528	1.647	0.821687	0.367186	1
CG11679	5.99064	5.59715	6.79933	6.17169	5.67671	4.48913	7.68763	6.16868	6.32222	5.07407	0.0221505	2.81822	0.0116892	0.914152	1
CG11686	24.961	29.0168	56.9737	18.5151	27.3514	47.6346	31.9153	23.9345	31.6111	29.1759	-0.0421099	4.32082	0.0554397	0.814407	1
CG11693	0	0.44188	1.1723	0.29389	0.860107	0	0.232958	0.986989	0.421482	1.01481	0.199764	-0.640104	0.0843488	0.77244	1
CG11694	0	0	0	0	0	0	0	0	0	0	0	-1.30545	0	1	1
CG11695	13.7286	17.9698	9.73007	13.8128	17.2021	11.2228	12.3468	17.2723	15.1733	13.9537	0.0470852	4.18668	0.0753829	0.824098	1
CG11696	14.9766	16.7915	10.5507	14.6945	14.7938	9.72644	11.182	14.3113	15.1733	10.9092	0.217112	3.85042	2.42267	0.123214	0.908739
CG11697	0	0	0	0	0	0	0	0	0	0	0	-1.28335	0	1	1
CG11698	0	0	0	0	0	0	0	0	0	0	0	-1.25524	0	1	1
CG11699	28.4556	31.2262	24.501	35.2668	29.9317	23.4432	24.4606	32.8174	26.5533	22.0722	0.200087	4.8116	2.95224	0.0893086	0.862509
CG11700	0.99844	1.62023	1.1723	1.46945	1.89224	2.24456	2.56254	1.48048	1.26444	1.52222	-0.327405	1.37136	0.700837	0.404792	1
CG11703	0	0	0	0	0	0	0	0	0	0	0	-1.30545	0	1	1
CG11710	17.9719	21.063	16.1777	22.9234	20.1265	15.2132	16.3071	22.7008	18.7559	23.087	0.0265598	4.49104	0.0557482	0.969735	1
CG11714	0.24961	0	0.468919	0.29389	0	0.249396	0.698875	0.246747	0	0	-0.194017	-0.707026	0.0509521	0.839987	1
CG1172	25.4602	24.4507	24.97	21.454	22.1908	18.2059	24.4606	25.1682	21.7063	25.1166	0.0511674	4.90677	0.231132	0.63189	1
CG11722	11.9813	14.8766	18.5223	14.6945	15.4819	19.2035	14.6764	13.3244	15.5948	15.9833	-0.047339	3.93336	0.111072	0.951523	1
CG11723	18.7208	19.59	22.0392	19.3967	19.2664	25.9372	20.7333	20.7268	17.07	21.5648	-0.0919096	4.32976	0.720618	0.469496	1
CG11726	0	0	0	0	0	0	0	0	0	0	0	-1.28351	0	1	1
CG11737	32.9485	35.7923	44.5473	28.2134	31.3079	43.1455	42.3984	38.2458	44.4663	41.3536	-0.268272	5.17339	5.75809	0.0185422	0.604589
CG11739	64.8986	82.1898	74.0892	77.5869	86.1827	60.3538	70.8194	62.4271	79.0278	63.9332	0.194033	6.45832	1.62337	0.206009	0.919373
CG11741	0.99844	1.03105	1.1723	2.64501	2.06426	1.49638	3.02846	1.23374	4.42556	0.507407	-0.523968	1.97037	0.649356	0.422536	1
CG11752	93.8534	90.1436	108.086	88.4608	92.0315	117.964	76.8763	82.1669	71.0196	67.7388	0.187264	6.17695	1.98215	0.162721	0.908739
CG11753	29.9532	21.2103	27.7835	28.8012	28.5556	34.1672	22.364	26.402	21.0741	22.8333	0.100943	4.51148	0.556197	0.457803	1
CG11755	6.98908	5.15527	7.15102	5.29002	4.98862	7.73127	6.7558	6.16868	7.79741	8.62591	-0.320469	2.65281	2.68715	0.104765	0.908739
CG11756	0	0	0	0	0	0	0	0	0	0	0	-1.24246	0	1	1
CG11760	0.74883	2.06211	0.351689	0.29389	0.344043	1.74577	0.931834	0.986989	0.421482	0.507407	-0.196249	0.43335	0.158694	0.714142	1
CG11762	0	0	0	0	0	0	0	0	0	0	0	-1.24226	0	1	1
CG11768	0	0	0.23446	0.29389	0.172021	0.498792	0.465917	0	0.421482	0	-0.906562	-0.798798	0.873284	0.352629	0.994198
CG11771	70.39	68.4915	70.2207	69.6519	63.82	65.5911	60.5692	73.5307	63.0115	62.411	0.0753293	5.98614	1.14794	0.286937	0.948688
CG11777	4.49298	5.59715	3.86858	5.8778	6.36479	5.48671	4.19325	5.18169	5.05778	6.59629	-0.0239952	2.55969	0.0125999	0.910884	1
CG11779	53.1669	52.7311	62.8352	49.9613	55.5629	59.3562	55.6771	57.4921	50.7885	49.9796	0.00901441	5.66048	0.011979	0.913098	1
CG11781	11.2325	11.3416	13.9503	6.75947	12.2135	14.7144	14.9093	10.1166	10.7478	8.87962	-0.0724299	3.50468	0.203482	0.88417	1
CG11786	0	0	0.11723	0	0.172021	0	0	0	0	0	1.88941	-1.10953	2.80793	0.137192	0.908739
CG11788	4.49298	3.97692	2.57906	3.23279	6.70884	3.74094	3.49438	4.6882	5.90074	3.80555	-0.0539269	2.24569	0.0511619	0.821583	1
CG11790	50.1716	51.4054	53.2223	52.6063	51.6064	56.8623	57.7737	48.6092	59.0074	50.487	-0.0748252	5.63097	0.681916	0.411182	1
CG11791	117.816	124.463	124.029	101.98	102.009	131.93	134.65	124.607	129.816	129.135	-0.187318	6.82548	3.89757	0.051522	0.804465
CG11796	70.6397	132.859	102.693	110.796	114.738	62.349	44.4951	66.6218	77.3419	57.0833	0.789635	6.19024	10.9913	0.00133538	0.218751
CG11802	24.7114	31.9627	26.8456	31.7401	29.2436	24.6902	23.7618	28.1292	22.3385	27.9074	0.189248	4.67915	2.44963	0.121176	0.908739
CG11807	43.9314	38.2963	51.6983	44.3774	46.6178	53.3707	48.9213	42.4405	44.0448	43.8907	-0.0468957	5.39831	0.270987	0.6199	1
CG11808	1.99688	2.94587	1.64122	3.52668	4.8166	1.49638	1.63071	2.46747	3.37185	2.53703	0.346062	2.03587	1.24669	0.267254	0.948688
CG11811	21.7161	25.4818	23.3287	31.1523	26.1473	23.1938	24.2277	30.1032	20.4419	25.8777	0.0420527	4.7097	0.161381	0.725301	1
CG11815	0	0	0	0	0	0	0	0	0	0	0	-1.30545	0	1	1
CG11816	0.24961	0	0.11723	0	0	0.249396	0.232958	0.493495	0	0	-1.18152	-0.889266	1.23623	0.269403	0.948688
CG11825	0.99844	1.91482	2.11014	0.29389	0.688086	0.498792	0.232958	0.740242	0.842963	0.76111	1.04862	1.12931	5.19067	0.0251532	0.652248
CG11828	0.24961	0.294587	0.351689	0	0	0.249396	0.465917	0.246747	0	0.507407	-0.461347	-0.255339	0.335458	0.598196	1
CG11835	23.2137	33.141	13.9503	27.0379	27.0074	22.9444	19.1026	25.415	16.227	19.2815	0.268256	4.29585	2.19624	0.141954	0.908739
CG11836	3.74415	2.50399	3.16521	3.52668	2.4083	3.74094	4.65917	3.70121	2.52889	3.04444	-0.221488	2.09792	0.54036	0.464257	1
CG11837	4.24337	3.97692	5.5098	6.46558	3.44043	5.48671	3.72734	3.70121	3.79333	4.56666	0.140476	2.53133	0.432655	0.512422	1
CG11839	4.24337	3.68234	3.39966	3.23279	6.19277	2.99275	3.72734	4.6882	2.95037	2.53703	0.298979	2.27813	1.66704	0.200069	0.912802
CG11841	16.9735	21.9467	19.9291	45.5529	28.7276	13.7168	18.6367	18.2593	23.3922	19.0278	0.49223	4.62547	3.76786	0.0554773	0.804465
CG11842	10.4836	7.36467	3.16521	9.11058	7.56894	6.2349	14.4434	4.1947	12.8552	10.4018	-0.421645	4.35199	0.76449	0.384329	1
CG11843	1.24805	1.17835	1.28953	4.11446	2.4083	0.249396	0.698875	1.48048	1.0537	1.77592	0.890342	0.564365	3.48758	0.0651911	0.804465
CG11851	9.9844	9.42678	16.8811	7.34725	11.1814	16.7095	14.2105	8.8829	14.1196	13.9537	-0.275483	3.68715	2.02609	0.158187	0.908739
CG11852	7.23869	6.03903	8.20609	4.70224	4.8166	5.9855	5.35805	6.16868	8.21889	6.08888	-0.0237838	2.79312	0.00925266	0.92359	1
CG11854	0.49922	0.736467	0.937839	0.29389	0.344043	0.997584	0.232958	0.493495	1.0537	0.76111	-0.233365	0.270091	0.16677	0.72655	1
CG11857	88.6116	93.2368	101.404	86.4036	98.2243	104.746	97.6096	82.1669	92.9367	104.526	-0.0405218	6.43884	0.308039	0.720075	1
CG11858	4.49298	7.51197	4.22027	9.11058	6.19277	2.74336	4.89213	7.40242	5.90074	3.04444	0.360908	3.01654	2.69137	0.104497	0.908739
CG11864	0	0	0	0	0	0	0	0	0	0	0	-1.30545	0	1	1
CG11865	0	0	0	0	0	0	0	0	0	0	0	-1.27661	0	1	1
CG11873	207.426	183.38	164.356	179.273	172.193	159.613	199.18	169.022	184.609	190.278	0.00517867	7.52608	0.0024667	0.960502	1
CG11876	335.476	363.52	324.375	327.981	344.043	346.66	268.834	333.602	263.215	270.955	0.193179	8.14185	3.7954	0.0546108	0.804465
CG11878	0	0	0.23446	0.29389	0.172021	0	0.232958	0	0	0.253703	0.446562	-0.355931	0.14556	0.703744	1
CG11880	76.6303	77.0345	87.5707	74.3541	78.4418	88.7849	92.0186	78.2189	72.4948	77.6332	-0.05202	6.04937	0.43257	0.54768	1
CG11882	2.99532	3.38775	3.63412	1.76334	1.89224	3.49154	2.7955	2.46747	2.31815	2.53703	0.0528612	2.328	0.0521444	0.819908	1
CG11883	122.559	97.2137	119.809	110.796	97.0201	116.967	106.229	104.127	104.317	127.359	-0.0306646	6.83847	0.192431	0.661987	1
CG11885	4.24337	5.30257	7.15102	4.99613	4.12851	8.23007	6.05692	7.40242	4.42556	4.31296	-0.208501	2.50323	0.860861	0.378517	1
CG11889	0.24961	0	0	0	0	0	0	0	0	0	1.29247	-1.29058	1.31986	0.293262	0.948688
CG11891	0	0	0	0	0	0	0	0	0	0	0	-1.30545	0	1	1
CG11892	2.4961	3.24046	3.16521	2.35112	3.95649	5.23731	5.35805	4.93495	3.16111	1.52222	-0.386136	1.34934	1.13616	0.289408	0.948688
CG11893	0	0.147293	0.11723	0	0	0.249396	0	0	0	0	0.376701	1.96362	0.14907	0.746635	1
CG11897	59.1576	46.9866	42.6717	46.7285	38.5328	39.654	47.2906	46.6352	38.5656	39.8314	0.138182	5.56421	1.17208	0.28196	0.948688
CG11898	0.49922	0.147293	0.11723	0	0	0	0	0	0	0	2.73587	-0.935074	4.47723	0.0374918	0.728237
CG11899	42.9329	40.653	25.5561	39.3812	32.6841	19.2035	25.1595	32.8174	43.6233	20.8037	0.33898	5.8856	1.74036	0.190548	0.908739
CG11902	33.6974	32.11	29.7764	25.8623	35.6084	31.1745	30.0516	35.0381	37.3011	31.9666	-0.0735307	4.96367	0.52503	0.470644	1
CG11905	0	0.883761	0.586149	0.58778	0.344043	0.498792	0	0.246747	0.210741	0.507407	0.762968	-0.457943	0.877857	0.351378	0.992907
CG11906	13.4789	14.4348	11.0196	10.58	10.6653	11.4722	10.7161	13.8179	11.38	10.9092	0.0483344	3.77375	0.107178	0.744165	1
CG11911	0	0	0	0	0.172021	0.249396	0	0	0	0.253703	-0.997806	0.885354	0.411788	0.524169	1
CG11912	0	0	0	0	0	0	0	0	0	0	0	-0.879899	0	1	1
CG11913	0	0.147293	0.468919	0	0.172021	0.498792	0.465917	0.246747	0.632222	1.01481	-1.43025	-0.568715	3.30239	0.0726151	0.810646
CG11920	7.73791	8.39573	7.50271	8.5228	6.88086	9.72644	7.22171	5.92194	6.53296	7.8648	0.0649464	3.05901	0.115651	0.734618	1
CG11927	13.2293	13.4037	12.8953	17.0456	15.654	10.9734	11.6479	14.5581	12.4337	12.1778	0.216099	3.83168	2.71765	0.102843	0.906788
CG11929	0	0	0	0	0	0	0	0	0	0	0	-1.26525	0	1	1
CG11951	19.22	21.063	26.2595	23.2173	17.2021	17.4577	14.6764	13.8179	16.8593	17.5055	0.416185	3.97554	4.68981	0.033073	0.699384
CG11961	34.6958	38.2963	46.5402	28.8012	36.6406	36.1624	35.8756	34.5446	35.8259	34.7574	0.0728039	5.13933	0.55266	0.459232	1
CG11964	17.9719	17.2333	8.90947	21.454	20.4706	9.97584	16.5401	23.441	18.1237	12.4315	0.0699342	4.34834	0.142285	0.706937	1
CG11966	0	0.147293	0	0	0	0	0	0	0	0	1.24599	-1.14771	1.237	0.293262	0.948688
CG11970	42.6833	44.0407	36.4585	47.0224	42.3173	39.654	44.2621	47.1287	44.2556	41.6074	-0.0340829	5.37971	0.127203	0.722211	1
CG11975	33.4478	29.7533	41.4994	32.6218	32.34	45.3901	38.2052	34.0511	38.1441	39.0703	-0.195416	5.09765	3.2616	0.0743713	0.810646
CG11977	0	0.147293	0	0	0	0	0	0	0	0	1.24592	-1.19954	1.32764	0.293262	0.948688
CG11980	20.2184	24.4507	24.501	22.6295	23.5669	21.1987	27.955	21.7138	25.9211	21.8185	-0.0366641	4.61669	0.0849373	0.784203	1
CG11982	41.4353	48.9014	37.6308	56.133	46.9619	46.1382	41.6996	55.7649	51.6315	43.8907	-0.0551956	5.52815	0.360397	0.549844	1
CG11983	2.99532	3.82963	4.3375	5.29002	2.4083	4.98792	1.63071	3.45446	4.00407	0.76111	0.327831	2.05235	1.6438	0.203203	0.915303
CG11984	179.719	209.009	129.07	204.253	199.201	146.146	135.815	211.709	149.837	158.057	0.199491	7.45499	2.93085	0.090457	0.866517
CG11985	7.98752	12.3727	11.723	12.6373	13.0736	12.2204	9.08538	13.3244	12.4337	9.64073	0.033279	3.54583	0.0470087	0.828859	1
CG11986	7.4883	5.44986	6.56487	8.5228	6.53682	3.74094	5.591	2.71422	5.05778	7.10369	0.491153	2.66241	6.3644	0.0134581	0.530866
CG11997	1.74727	0.883761	2.3446	1.76334	1.72021	2.99275	2.32958	2.46747	1.26444	1.77592	-0.343026	0.440799	0.562096	0.455436	1
CG11999	16.4743	16.4969	10.5507	15.2823	17.7182	15.9613	14.2105	13.0776	13.6981	12.4315	0.132177	4.02638	0.725185	0.396782	1
CG12003	0	0	0	0	0.172021	0	0	0	0	0	1.26145	-1.29152	1.48161	0.293262	0.948688
CG12004	160.749	139.34	188.037	134.308	135.897	187.296	160.508	145.581	154.684	167.698	-0.103562	7.28193	1.75655	0.188519	0.908739
CG12006	47.6755	49.0487	54.1602	40.2629	45.2416	52.8719	49.1542	54.5312	49.1026	48.711	-0.100134	5.69449	1.6651	0.267828	0.948688
CG12007	29.9532	26.5128	24.6183	27.3318	25.6312	21.6974	23.2958	26.8955	22.9707	24.1018	0.168	4.60522	2.60413	0.1102	0.908739
CG12009	0	0.147293	0.351689	0.29389	0.172021	0	0	0	0	0	3.17882	-1.05345	7.12733	0.0100414	0.478527
CG12010	5.49142	6.62821	8.44055	7.34725	7.05288	5.23731	9.08538	4.1947	6.7437	5.58147	0.185388	2.68208	0.716217	0.399705	1
CG12011	0.24961	0.736467	0.703379	0.58778	0.860107	1.49638	0	0.740242	0.210741	0.507407	0.162259	0.134776	0.0360999	0.849751	1
CG12012	31.7005	24.0088	32.0037	19.6906	26.6633	33.1697	29.5857	23.6877	23.1815	30.6981	-0.0567344	4.7813	0.241735	0.79489	1
CG12014	7.73791	6.03903	5.86149	7.93503	8.42905	7.23248	7.45467	9.12965	5.26852	5.32777	0.0498952	3.22013	0.0908391	0.901107	1
CG12016	0.49922	0	0.468919	0	0	0.249396	0.232958	0	0.210741	0	0.455048	-0.632519	0.174299	0.677346	1
CG12017	0.49922	0.294587	0.468919	0.29389	0.344043	0	0.232958	0	0.421482	0	1.29966	-0.546845	1.88326	0.173839	0.908739
CG12018	4.49298	5.59715	4.92365	4.11446	3.61245	4.48913	3.72734	5.67519	3.37185	3.55185	0.144569	2.45828	0.319278	0.573493	1
CG12020	0	0	0	0	0	0	0	0	0	0	0	-1.2834	0	1	1
CG12024	72.6365	76.4453	80.3024	68.4763	72.249	82.0513	61.734	78.2189	72.4948	70.0221	0.0245926	6.15795	0.114259	0.73616	1
CG12025	148.019	163.643	208.904	156.937	158.948	189.292	186.367	172.97	180.183	200.679	-0.149978	7.52963	2.6898	0.104596	0.908739
CG12027	0.24961	0	0.11723	0	0	0	0	0	0	0	1.91784	-1.13404	2.2047	0.142899	0.908739
CG12034	24.961	21.063	22.1564	22.0417	23.739	22.695	22.597	24.1812	20.8633	23.8481	-0.00398543	4.59472	0.00105524	0.97416	1
CG12035	0	0	0	0	0	0	0	0	0	0	0	-1.29805	0	1	1
CG12038	37.4415	35.9396	34.4656	47.904	49.0261	36.1624	38.9041	43.4275	33.297	36.2796	0.117881	5.18618	1.33489	0.251095	0.948688
CG12042	28.7052	30.4897	23.5632	30.2707	32.34	22.695	25.1595	29.3629	24.0244	25.1166	0.198701	4.81574	4.24799	0.0422764	0.750697
CG12050	18.4711	16.4969	18.1706	17.6334	20.2985	19.9517	19.8015	18.9995	20.8633	19.7889	-0.126788	4.27887	0.83009	0.364759	1
CG12054	154.509	146.115	152.282	149.59	150.003	138.664	149.326	140.893	134.663	162.878	0.0509937	7.22641	0.452076	0.503129	1
CG12056	15.975	18.1171	16.5294	21.7478	12.3855	13.218	16.5401	15.0516	18.7559	16.7444	0.065425	4.09513	0.298758	0.699497	1
CG12057	0	0.147293	0.11723	0	0	0	0	0	0	0	1.89387	0.826683	1.6932	0.197625	0.910015
CG12061	0	0	0	0	0	0	0	0	0	0	0	-1.18131	0	1	1
CG12065	63.6506	78.802	63.8902	75.8236	71.3889	55.3659	64.2965	70.8165	65.5404	67.2314	0.128632	5.94661	1.79309	0.184032	0.908739
CG12069	0	0	0	0	0	0	0	0	0	0	0	-1.27714	0	1	1
CG12071	80.8737	106.051	66.4693	106.094	102.353	71.3272	87.8254	125.841	96.73	94.1239	-0.045566	6.67601	0.108056	0.743157	1
CG12075	53.6662	62.3051	63.773	56.4268	57.4552	52.6225	52.6486	56.0116	47.8382	57.0833	0.145063	5.55366	2.08943	0.151906	0.908739
CG12078	0	0.147293	0.11723	0	0	0	0	0	0	0	1.87436	-1.26954	2.77098	0.137192	0.908739
CG1208	29.454	25.3345	31.7693	25.8623	19.2664	43.3949	37.2734	26.6487	26.9748	32.7277	-0.340112	4.38812	3.32504	0.0716595	0.810646
CG12081	24.961	23.1251	21.4531	26.4501	25.2872	27.4336	23.7618	28.1292	23.1815	21.5648	-0.0384167	4.6548	0.148421	0.700987	1
CG12082	29.9532	34.614	26.7284	35.5607	38.3608	23.6926	22.364	35.7784	26.5533	25.3703	0.30206	4.90229	5.59725	0.0202057	0.619011
CG12084	104.836	96.9191	102.224	93.7509	102.353	95.768	95.0471	100.92	103.474	104.779	0.000703028	6.57966	9.45022e-05	0.992266	1
CG12090	188.456	175.721	160.722	166.048	162.732	157.369	171.457	165.567	150.68	163.385	0.0781291	7.43769	1.02083	0.315119	0.966503
CG12091	189.704	196.784	175.845	213.952	208.146	189.79	194.986	197.891	171.754	194.337	0.0526305	7.60576	0.57222	0.451417	1
CG12093	30.702	32.5519	34.7	33.2095	29.5877	29.4287	24.2277	30.1032	29.9252	23.8481	0.225413	4.87401	5.43322	0.0220652	0.6332
CG12096	14.2278	18.559	20.2808	22.0417	24.427	24.6902	18.6367	20.2333	21.4956	16.4907	-0.0264793	4.37147	0.0498823	0.83775	1
CG12099	185.46	213.281	159.667	201.902	190.6	179.814	185.435	212.203	186.927	181.398	0.00712469	7.60514	0.0105039	0.918604	1
CG12104	10.234	11.6362	11.1368	9.40447	11.3534	9.47704	10.0172	13.3244	12.8552	13.7	-0.132763	3.83348	0.629741	0.429605	1
CG12105	3.99376	6.48091	2.22737	2.05723	3.26841	4.73852	4.65917	4.6882	4.42556	4.31296	-0.316573	2.40244	1.21796	0.272799	0.948688
CG12106	12.2309	10.8997	16.4122	17.3395	13.0736	14.465	13.2786	12.8309	11.8015	13.7	0.0791326	3.63862	0.326458	0.569222	1
CG12107	15.2262	23.1251	24.1493	24.3929	26.3193	32.4215	29.8187	27.6357	29.7144	22.8333	-0.324991	4.79313	7.71791	0.00669441	0.405715
CG12111	0	0	0.11723	0	0	0.498792	0	0	0	0	-1.03788	-0.877672	0.704126	0.403696	1
CG12112	10.7332	4.12422	5.5098	5.8778	5.16064	4.23973	5.35805	7.89591	7.58667	6.84999	-0.0609116	2.83742	0.0725296	0.788325	1
CG12115	0	0.294587	0.351689	0	0	0.249396	0.232958	0	0	0	0.640465	-1.07378	0.402803	0.527937	1
CG12116	140.53	123.579	39.5064	132.544	92.0315	53.1213	124.4	156.685	241.298	102.242	-0.371556	7.16738	1.16169	0.28409	0.948688
CG12118	45.6786	49.7852	50.0571	43.2018	37.8447	58.1092	54.5123	55.0247	52.2637	49.4722	-0.246747	5.38536	5.76559	0.0184683	0.604589
CG12119	21.9657	51.4054	24.8527	16.4578	25.8032	42.1479	27.955	23.9345	21.2848	17.7592	0.102295	5.13091	0.079909	0.778091	1
CG12121	105.086	92.0584	111.368	107.27	101.493	99.0102	105.763	95.4912	102.841	98.6906	0.0431888	6.51305	0.461806	0.498582	1
CG12123	11.2325	8.69031	12.8953	9.40447	11.0094	10.4746	10.949	11.8439	8.85111	8.87962	0.0704274	3.39824	0.249507	0.618681	1
CG12125	28.7052	26.5128	26.7284	22.3356	25.1151	24.9396	30.0516	26.1552	25.9211	23.5944	-0.0118367	4.73819	0.0113623	0.954592	1
CG12126	0	0	0	0	0	0	0	0	0	0	0	-1.30545	0	1	1
CG12128	15.2262	14.2875	16.5294	14.9884	15.4819	15.4625	17.4719	15.5451	16.0163	17.2518	-0.0929749	4.20619	0.503457	0.479879	1
CG12129	14.2278	12.6672	18.1706	9.69836	18.0623	12.4698	12.1138	14.8048	14.7519	8.87962	0.224712	3.95387	2.08909	0.15194	0.908739
CG1213	205.928	226.979	310.542	231.879	202.297	306.508	241.578	227.995	272.699	236.452	-0.124779	7.52475	0.825606	0.366051	1
CG12133	0	0	0	0	0.172021	0	0	0	0	0	1.2614	-1.2276	1.27309	0.293262	0.948688
CG12134	3.49454	5.00798	3.28243	4.11446	4.64458	1.74577	4.42621	4.93495	3.58259	2.79074	0.228892	2.53503	0.736773	0.39305	1
CG12147	0	0	0	0	0.172021	0	0	0	0	0.253703	-0.270728	-1.25635	0.0636837	0.829654	1
CG12155	32.4493	31.9627	25.7906	31.4462	27.0074	21.1987	25.3925	26.8955	31.4004	27.1463	0.163792	4.85911	2.73476	0.101783	0.902218
CG12158	180.468	273.671	202.104	189.853	192.664	294.038	203.839	298.071	292.508	229.094	-0.341513	8.07607	5.03505	0.0273727	0.662775
CG12159	18.4711	21.7994	21.2186	17.9273	19.6104	25.6878	21.4322	18.9995	17.7022	21.3111	-0.0766066	4.49437	0.47071	0.612718	1
CG12162	56.4119	56.8553	48.2987	61.1291	59.6914	60.8526	52.6486	55.0247	51.6315	47.9499	0.0719374	5.67106	0.563688	0.4548	1
CG12163	276.318	292.525	206.793	292.126	304.994	224.706	237.618	284.5	264.48	228.84	0.145561	8.00131	2.483	0.118705	0.908739
CG12164	0.24961	0.589174	0.11723	0	0.344043	0	0.232958	0.246747	0	0.253703	0.850462	0.686846	0.973472	0.326546	0.97569
CG12170	21.4665	25.1872	24.6183	25.2745	26.1473	27.1842	23.5288	23.441	22.1278	22.3259	0.0515777	4.5868	0.201098	0.654948	1
CG12171	18.9704	17.5279	13.7159	16.7517	18.0623	17.2083	12.8127	17.5191	14.7519	15.4759	0.12368	4.07034	0.605533	0.438582	1
CG12173	14.2278	15.3185	13.7159	16.1639	16.342	14.2156	11.6479	15.2983	14.9626	10.9092	0.171746	3.91887	1.58066	0.212023	0.925981
CG12177	25.7098	26.3655	24.8527	23.2173	32.5121	33.4191	27.955	31.3369	26.9748	23.5944	-0.107053	4.71396	0.671173	0.414877	1
CG12179	5.99064	4.71339	3.16521	4.99613	4.98862	2.99275	3.26142	4.44145	4.84704	8.37221	-0.0291356	2.80912	0.0168318	0.897073	1
CG1218	5.74103	10.4578	5.74426	6.75947	7.39692	6.73369	7.22171	7.64917	5.90074	6.84999	0.0845143	3.17584	0.150118	0.699367	1
CG12182	15.4758	18.4117	18.6395	13.225	12.7296	17.4577	21.1992	17.5191	12.8552	15.9833	-0.100687	3.89928	0.633399	0.592325	1
CG12184	0	0	0	0	0	0	0	0.246747	0	0	-1.52946	-0.887792	2.17628	0.19043	0.908739
CG12194	131.295	101.632	147.241	108.151	104.589	145.148	122.536	96.2315	102.209	106.048	0.0528186	6.65929	0.322431	0.57161	1
CG12200	0.24961	0.147293	0	0	0.172021	0	0	0	0.210741	0	0.88156	-1.01058	0.597263	0.46687	1
CG12203	147.52	166	126.374	134.014	155.335	148.889	107.161	141.633	129.816	120.255	0.171487	6.92512	2.46954	0.119694	0.908739
CG12204	3.49454	5.15527	1.05507	3.82057	4.47256	1.49638	1.16479	2.71422	5.69	2.28333	0.378562	2.22231	1.12145	0.292532	0.948688
CG12206	0.99844	1.32564	0.820609	0.58778	0.172021	0.249396	0.465917	0.986989	0.210741	0.253703	0.849973	0.60611	2.37882	0.126613	0.908739
CG12207	87.8628	90.4382	91.7909	86.9914	94.9558	95.5186	91.5527	86.1148	88.9326	98.6906	-0.026568	6.58759	0.185163	0.711299	1
CG12209	0.24961	0	0.351689	0.29389	0.172021	0	0	0.246747	0	0	1.68473	-0.951016	2.48748	0.118377	0.908739
CG12213	76.1311	76.0034	62.6007	74.648	78.9578	52.8719	70.5864	78.7124	70.1767	70.0221	0.10343	6.2462	1.51288	0.222008	0.939813
CG12219	11.9813	17.8225	14.6537	11.4617	18.4063	13.218	13.0457	12.3374	12.0122	15.9833	0.177124	3.94798	1.41365	0.23768	0.948688
CG12224	19.9688	8.24843	6.79933	4.11446	7.56894	5.23731	8.15355	8.14266	10.7478	7.3574	0.210566	2.92525	0.65079	0.422026	1
CG12229	0	0	0.23446	0.29389	0.344043	0	0.232958	0	0	0	1.45762	-0.941001	1.56293	0.214742	0.930911
CG12231	0	0	0	0	0	0	0	0	0.210741	0	-1.51451	-1.20714	1.74248	0.194487	0.910015
CG12236	37.9407	43.5989	37.5135	38.2057	40.081	35.1648	42.8644	44.6613	43.6233	49.2185	-0.125642	5.47183	1.48802	0.225814	0.942884
CG12237	75.6319	70.4063	69.5173	72.2969	71.3889	72.3248	68.4898	65.8815	62.1685	63.1721	0.112783	6.13705	2.32135	0.131229	0.908739
CG12239	288.3	383.405	114.065	382.938	391.349	163.105	196.151	409.847	252.257	205.5	0.344679	8.52481	1.41111	0.238099	0.948688
CG12241	33.4478	38.4436	34.8173	31.1523	34.9204	36.1624	28.6539	32.0772	33.5078	31.7129	0.0961999	5.08259	1.13519	0.289613	0.948688
CG12253	11.7317	12.2254	13.0125	12.9312	9.6332	16.9589	10.7161	12.8309	9.06185	12.9389	-0.0657096	3.61126	0.176919	0.683004	1
CG12256	2.74571	2.50399	3.28243	1.17556	2.23628	1.74577	2.56254	2.71422	2.31815	2.02963	0.115451	2.02262	0.0860896	0.769906	1
CG12259	5.49142	6.03903	3.98581	7.05336	8.08501	4.23973	4.42621	9.12965	6.32222	6.84999	-0.0312494	2.91993	0.0180714	0.893372	1
CG12262	110.827	149.061	107.031	113.148	111.814	103.749	107.161	94.9977	95.0441	92.348	0.263847	6.99319	1.71266	0.19408	0.910015
CG12263	32.4493	26.8074	42.2027	27.0379	30.1038	42.6467	35.6426	27.6357	32.0326	30.6981	-0.0805756	4.85497	0.495786	0.631313	1
CG12264	54.415	51.4054	51.9328	56.7207	59.5194	50.378	51.4838	56.5051	56.9	49.9796	0.0448158	5.68563	0.252745	0.616417	1
CG12267	6.73947	3.82963	6.09595	3.82057	5.84873	6.48429	6.7558	4.44145	7.58667	5.58147	-0.225663	2.90103	1.33835	0.250486	0.948688
CG12268	5.74103	7.51197	10.3162	13.8128	10.1493	5.73611	4.19325	7.89591	6.53296	5.07407	0.680142	2.78874	8.21472	0.0052078	0.387427
CG12269	57.6599	77.3291	67.5244	74.0602	91.3434	53.3707	59.8703	76.4917	67.8585	50.7407	0.255789	6.07295	3.42459	0.0676191	0.804465
CG1227	8.23713	10.3105	14.4193	9.40447	11.1814	8.23007	8.38651	8.8829	10.3263	10.1481	0.24052	3.45997	1.69906	0.195843	0.910015
CG12272	42.6833	35.7923	36.4585	33.5034	36.1245	39.654	36.3415	40.2198	40.2515	37.2944	-0.0709421	5.18319	0.597905	0.44147	1
CG12278	0.24961	0.44188	0.468919	0.881669	0.172021	0	0	0.246747	0.842963	0.507407	0.352162	-0.556099	0.215285	0.643813	1
CG12279	10.234	9.57408	10.0818	6.75947	11.3534	7.98067	10.4831	9.12965	8.21889	8.62591	0.12515	3.44521	0.728854	0.395595	1
CG12288	1.49766	1.76752	0.468919	1.46945	2.92436	1.24698	1.16479	1.48048	3.37185	1.01481	-0.0739572	1.28117	0.028164	0.867113	1
CG12289	0	0	0	0	0	0	0	0	0	0	0	-1.30545	0	1	1
CG12290	52.1685	44.7772	55.098	47.904	42.1453	48.8816	51.2509	47.1287	42.9911	52.7703	-0.00445653	5.57521	0.00172284	0.966987	1
CG12299	38.44	41.2422	28.3696	36.7362	41.6292	30.1769	31.2164	48.3625	39.1978	38.5629	-0.0113103	5.3565	0.0083035	0.927603	1
CG12301	6.98908	6.18633	2.22737	4.40835	5.16064	2.49396	3.96029	6.41543	6.7437	5.58147	-0.0521479	3.22453	0.0391453	0.843622	1
CG12304	31.4509	31.6681	31.7693	35.8546	33.8882	29.4287	31.4494	29.1162	33.5078	34.5037	0.056274	4.98934	0.357511	0.552522	1
CG12307	0	0	0	0	0	0	0	0	0	0	0	-1.28329	0	1	1
CG12309	0.24961	0	0	0	0	0	0	0	0	0	1.29224	-1.24038	1.3629	0.293262	0.948688
CG1231	6.98908	5.59715	4.22027	8.22891	7.05288	6.48429	2.7955	7.64917	5.90074	4.56666	0.194796	2.81691	0.98981	0.444833	1
CG12310	0	0	0	11.1678	1.20415	0	24.4606	0	16.227	4.05925	-2.03231	0.284939	2.79776	0.101628	0.901728
CG12316	30.702	35.2031	21.3358	30.2707	37.3287	19.9517	28.8869	30.1032	28.6607	30.1907	0.164336	4.98621	1.28795	0.259536	0.948688
CG12320	8.73635	7.95385	5.97872	6.46558	6.53682	7.23248	7.68763	6.16868	9.90482	7.6111	-0.125453	2.91774	0.474341	0.492826	1
CG12321	11.2325	12.8145	11.4885	12.3434	15.998	13.218	13.5116	13.8179	12.4337	11.1629	-0.00354809	3.71864	0.000492211	0.98235	1
CG12325	11.4821	11.047	12.778	12.9312	11.8695	13.9662	13.2786	10.1166	11.5907	13.1926	-0.048436	3.76814	0.113711	0.736768	1
CG1233	42.9329	42.4205	38.3341	34.0912	46.1018	33.9178	37.7393	42.4405	43.8341	32.474	0.0997986	5.3005	1.46819	0.228906	0.947073
CG12333	66.1467	64.9564	53.2223	62.0108	60.2075	61.8502	61.501	62.9206	58.5859	64.4407	-0.0147839	5.87062	0.0245254	0.875918	1
CG12338	38.44	43.7462	33.5277	36.4423	41.9732	42.3973	33.3131	34.2979	42.7804	32.2203	0.0689443	5.39873	0.169945	0.681173	1
CG1234	10.7332	12.8145	9.96453	17.0456	13.5897	10.9734	10.2502	12.3374	16.0163	14.4611	-0.0161315	3.8029	0.00956607	0.922311	1
CG12341	17.4727	18.1171	23.7977	19.9845	20.1265	25.189	18.8696	19.7398	18.3344	16.9981	0.0121991	4.18665	0.0095791	0.922258	1
CG12343	12.4805	20.4738	13.1297	21.454	19.7825	17.4577	16.773	20.7268	16.0163	19.2815	-0.0512734	4.38142	0.142153	0.707066	1
CG12344	12.4805	13.551	17.1156	11.4617	18.4063	18.9541	17.4719	11.3504	17.7022	15.4759	-0.13314	4.04125	0.395753	0.530936	1
CG12347	0	0	0	0	0.172021	0	0	0	0	0	1.26145	-1.28385	1.35522	0.293262	0.948688
CG12355	46.6771	35.9396	67.9933	38.4996	44.3815	84.2958	68.9557	40.4666	57.9537	62.6647	-0.419987	5.65567	8.18818	0.00527779	0.387427
CG1236	13.9782	13.8456	13.8331	14.4006	19.4384	14.465	14.2105	14.3113	17.4915	12.9389	0.038621	4.02841	0.0791682	0.796948	1
CG12360	72.8861	69.3752	80.8886	73.7663	78.0977	78.3103	74.0808	75.5047	84.0856	88.7962	-0.094872	6.27453	2.12884	0.148145	0.908739
CG12362	0	0	0.23446	0	0	0.498792	0.232958	0	0	0	-0.883468	-0.819014	0.651353	0.430333	1
CG12374	0	0.147293	0.11723	0.29389	0	0.249396	0	0	0.210741	0	0.116997	4.01347	0.000739893	0.978372	1
CG12375	24.7114	24.598	27.3145	22.9234	24.7711	24.4408	23.0629	19.493	24.6567	26.6389	0.0759237	4.63608	0.402405	0.527511	1
CG12376	0	0	0	0	0	0	0	0	0	0	0	-1.24852	0	1	1
CG12379	1.24805	3.09316	3.04798	1.76334	2.4083	1.74577	2.09663	3.70121	2.52889	2.02963	-0.00965578	1.65678	0.00100875	0.974735	1
CG12384	65.1482	65.1037	70.3379	62.8924	57.9712	73.8212	67.092	63.6608	57.3215	49.9796	0.044964	5.91714	0.190317	0.663731	1
CG1239	3.74415	6.03903	5.39257	3.23279	4.8166	5.23731	4.65917	4.44145	3.79333	2.53703	0.204808	2.56457	0.605526	0.438584	1
CG12391	23.713	27.2493	11.8402	29.6829	27.5234	15.9613	17.2389	29.8564	21.0741	13.9537	0.2724	4.84019	1.51845	0.221167	0.938592
CG12393	26.9579	34.614	24.97	34.679	34.5763	25.189	28.4209	31.8304	29.9252	26.8926	0.127366	4.82486	1.02839	0.313343	0.96534
CG12395	0	0	0	0	0	0	0.232958	0	0	0	-1.5243	-1.26917	2.1673	0.19043	0.908739
CG12398	0	0	0.11723	0	0	0	0	0	0	0	1.22044	-1.11011	1.29535	0.293262	0.948688
CG12400	115.819	152.301	137.745	130.193	156.195	153.877	112.519	139.165	124.126	111.883	0.111709	6.91478	1.12128	0.292568	0.948688
CG12402	32.4493	27.2493	35.7551	33.5034	26.3193	36.6612	31.9153	32.0772	33.297	40.8462	-0.171461	5.11907	2.56863	0.112619	0.908739
CG12404	36.4431	31.9627	42.7889	33.2095	35.9525	42.1479	40.5348	31.8304	40.2515	41.0999	-0.115231	5.08198	1.3641	0.246013	0.948688
CG12413	7.73791	11.6362	7.50271	12.3434	11.3534	8.47946	4.89213	11.1036	11.8015	8.87962	0.151876	3.39891	0.693691	0.407188	1
CG12420	0.49922	0.147293	0.468919	0	0	0	0	0.246747	0.210741	0.253703	0.647934	-0.346332	0.623081	0.432046	1
CG12426	0	0	0.351689	0.29389	0	0.249396	0.232958	0	0	0.253703	-0.0718676	-1.05818	0.00450343	0.982075	1
CG12428	20.468	17.9698	17.2328	17.9273	19.9545	14.7144	21.1992	20.2333	17.7022	17.7592	0.026414	4.87943	0.0189461	0.890839	1
CG12438	0	0	0	0	0	0	0	0	0	0	0	-1.26934	0	1	1
CG12439	0	0	0	0	0	0	0	0	0	0	0	-1.29814	0	1	1
CG12446	0	0	0	0	0	0	0	0	0	0	0	-1.2484	0	1	1
CG12448	0	0	0.586149	0.29389	0	0.249396	0	0	0	0.253703	0.87403	-0.851837	0.718091	0.399203	1
CG1246	0.24961	0.44188	0.23446	0.29389	1.03213	0.997584	0.465917	0.740242	0.632222	0	-0.298108	0.163108	0.148224	0.701176	1
CG12464	0	0	0	0	0	0	0	0	0	0	0	-1.30545	0	1	1
CG12470	0.99844	1.17835	2.11014	0.881669	0.688086	0.498792	0.232958	0.246747	0.632222	0.507407	1.46521	0.646943	8.62877	0.00423248	0.353038
CG12477	0	0	0	0.29389	0	0	0	0	0	0	1.30306	-1.22648	1.4373	0.293262	0.948688
CG12479	0	0.147293	0	0	0	0	0	0	0	0	1.2458	-1.29133	1.65168	0.293262	0.948688
CG12480	0	0.294587	0	0	0.172021	0.249396	0	0	0	0	0.825133	-1.16784	0.541565	0.46687	1
CG12481	0	0	0	0	0	0	0	0	0	0	0	-1.30545	0	1	1
CG12483	0.99844	2.79858	2.57906	1.46945	1.03213	3.24215	2.56254	2.46747	1.26444	3.80555	-0.505071	1.29718	1.50955	0.222514	0.940371
CG12484	136.786	125.789	134.697	131.075	147.938	134.175	151.889	145.828	145.833	143.089	-0.0920169	6.98961	1.67221	0.199379	0.912802
CG12490	0	0	0.11723	0	0	0	0	0	0	0	1.22059	-1.07803	0.980503	0.328152	0.97569
CG12491	0	0	0	0	0	0	0	0	0	0	0	-1.30545	0	1	1
CG12493	0	0	0.23446	0	0.172021	0	0.931834	0	0.210741	0	-1.05024	-0.747851	0.95534	0.331068	0.976681
CG12496	0	0	0	0	0	0	0	0	0	0	0	-1.24806	0	1	1
CG12498	0	0	0	0	0	0	0	0	0	0	0	-1.23493	0	1	1
CG12499	19.7192	19.59	17.7017	15.5762	15.998	18.2059	19.1026	16.0386	22.1278	14.9685	-0.0305059	4.27434	0.0289824	0.865214	1
CG12502	112.824	103.105	114.885	111.09	108.546	103.749	108.326	106.842	102.631	111.883	0.0452345	6.75538	0.354148	0.553316	1
CG12506	0	0	0.11723	12.9312	0	0.249396	171.224	0	15.1733	0.76111	-4.16975	1.63259	8.1784	0.0067629	0.406918
CG12507	0.24961	0.147293	0.468919	0	0.172021	0.997584	0.232958	0.246747	0	0.253703	-0.485443	-0.593637	0.367064	0.569205	1
CG12511	0	0.147293	0	0	0	0	0	0	0	0	1.2458	-1.28365	1.42244	0.293262	0.948688
CG12512	49.1732	44.0407	41.851	44.3774	51.4344	48.6322	43.7962	51.3234	55.6356	48.4573	-0.10428	5.51549	0.839775	0.361989	1
CG12516	0	0	0	0	0	0	0	0	0	0	0	-1.29089	0	1	1
CG12517	0	0	0.11723	0	0	0	0	0	0.210741	0	-0.293947	-1.00964	0.0478902	0.827529	1
CG12519	0	0	0	0	0.172021	0.249396	0	0	0	0	-0.269206	-1.17899	0.0485227	0.829654	1
CG12520	0.74883	1.76752	2.3446	0.58778	0.860107	0.997584	1.63071	2.96097	0.842963	1.01481	-0.140064	0.379263	0.103182	0.996069	1
CG12521	0	0	0.11723	0	0.172021	0	0.232958	0.246747	0.210741	0	-0.833505	-1.0586	0.652992	0.430333	1
CG12522	0	0.294587	1.05507	0.58778	0.344043	0.249396	0	0.493495	0.632222	0.507407	0.357224	-0.083964	0.22007	0.640602	1
CG12523	0	0	0	0	0	0	0	0	0	0	0	-1.23487	0	1	1
CG12531	259.594	215.048	322.616	220.417	208.834	271.093	277.687	205.541	217.695	255.479	3.90995e-05	7.96295	1.27431e-07	0.999716	1
CG12535	0	0	0	0	0	0.249396	0	0	0.210741	0	-2.24481	-0.84726	3.61565	0.0640775	0.804465
CG12538	0	0	0	0	0	0	0	0	0	0	0	-1.29828	0	1	1
CG12539	0	0	0	0.29389	0	0	0	0.493495	0	0	-0.955864	-1.06429	0.555169	0.458812	1
CG12540	0	0	0	0	0	0	0	0	0	0	0	-1.2495	0	1	1
CG12541	28.7052	30.1952	40.9132	27.0379	31.3079	42.1479	43.0973	33.5576	33.297	41.8611	-0.282389	5.32239	5.24346	0.0244442	0.647983
CG12546	0	0	0	0	0	0	0	0	0	0	0	-1.30545	0	1	1
CG12547	110.577	85.4302	169.866	90.2242	93.0636	164.601	150.025	101.413	117.804	143.089	-0.29665	6.85636	5.08289	0.0266691	0.65856
CG12560	11.4821	11.047	11.6058	11.1678	11.0094	13.9662	11.182	9.3764	10.7478	14.9685	-0.0939068	3.60512	0.249023	0.619021	1
CG12567	69.3916	63.1889	109.141	54.9574	56.251	109.485	91.5527	65.6348	80.2922	103.511	-0.342859	6.30905	5.01224	0.0277151	0.665122
CG12576	120.562	111.796	117.464	104.037	94.6118	142.654	130.69	108.816	109.796	131.926	-0.185102	6.89955	5.58458	0.0203432	0.619508
CG12581	106.584	116.509	135.752	109.327	97.0201	117.964	98.0755	102.4	103.052	110.868	0.0886522	6.76455	1.1964	0.277055	0.948688
CG12582	60.9049	55.9715	61.6629	61.1291	77.2376	68.3345	63.5977	66.6218	72.9163	65.4555	-0.0882841	6.11199	0.988535	0.322852	0.972686
CG12589	0	0.147293	0.11723	0	0	0	0	0	0	0	1.87491	-1.18775	2.50773	0.137192	0.908739
CG12590	1.24805	1.03105	0.937839	2.35112	0.688086	2.74336	1.63071	0.740242	1.26444	1.01481	-0.310829	0.528099	0.459536	0.499636	1
CG12592	0	0	0	0	0	0	0	0	0	0	0	-0.938341	0	1	1
CG12594	44.6802	48.6068	49.0021	52.9002	46.6178	52.3731	55.4441	44.908	49.9456	52.0092	-0.0756659	5.55105	0.966718	0.328221	0.97569
CG12605	189.953	133.301	176.9	166.929	165.657	155.872	188.696	144.347	190.931	229.348	-0.127643	7.54733	1.44029	0.233344	0.948688
CG12607	0	0.589174	0	0	0	0	0	0	0	0	2.67851	-1.13745	4.14806	0.0464922	0.770435
CG12608	22.7145	22.094	13.247	24.9806	20.6426	14.7144	17.9378	22.2073	22.9707	16.4907	0.116821	4.39446	0.645473	0.648428	1
CG12609	0	0	0.11723	0.29389	0	0	0	0	0.210741	0	0.413695	-1.173	0.11496	0.746635	1
CG12617	0	0	0	0	0	0	0	0	0	0	0	-0.984795	0	1	1
CG12620	0	0	0	0	0	0	0	0	0	0	0	-1.29802	0	1	1
CG12637	0	0	0	0	0	0	0	0	0	0	0	-1.27062	0	1	1
CG12640	0	0	0	0	0	0	0	0.246747	0	0	-1.52953	-1.0568	1.83472	0.19043	0.908739
CG12643	3.49454	4.86068	5.04088	2.9389	4.47256	2.49396	3.49438	4.1947	5.47926	3.04444	0.18024	2.72142	0.316134	0.575383	1
CG12645	0	0	0.23446	0	0	0	0	0	0	0	1.85234	-1.09544	2.18722	0.144847	0.908739
CG1265	33.4478	44.4826	49.5882	35.8546	41.1131	58.1092	42.1655	43.4275	34.983	35.7722	-0.0579637	5.26507	0.212033	0.646325	1
CG12655	6.98908	5.59715	6.6821	2.64501	3.78447	5.73611	6.28988	5.18169	2.73963	5.07407	0.0759848	3.01251	0.0982832	0.754649	1
CG12659	1.74727	2.65128	3.98581	2.05723	1.54819	5.48671	2.32958	2.71422	2.10741	3.29814	-0.345106	1.68953	1.35185	0.295477	0.949192
CG12661	0	0	0	0	0	0	0	0	0	0	0	-1.27674	0	1	1
CG12662	0	0.147293	0	0	0	0	0	0	0	0	1.24581	-1.26239	1.52046	0.293262	0.948688
CG12672	2.4961	1.62023	1.75845	1.46945	3.44043	0.748188	2.09663	1.72723	1.26444	1.52222	0.543557	1.57464	2.4521	0.120991	0.908739
CG12674	0	0	0	0	0	0	0	0	0.210741	0	-1.51437	-1.27761	2.41769	0.19043	0.908739
CG12679	0	0	0	0	0	0	0	0	0	0	0	-1.30545	0	1	1
CG12680	0	0.147293	0	0	0.172021	0.249396	0	0	0	0.253703	-0.348339	-1.24823	0.114746	0.760928	1
CG12681	0	0	0.468919	0	0	0	0.232958	0.246747	0.210741	0	-0.121585	-0.955143	0.00909076	0.924308	1
CG12682	0	0	0	0	0	0	0	0	0	0	0	-1.22849	0	1	1
CG12684	0	0	0	0	0	0	0	0	0	0	0	-1.23676	0	1	1
CG12688	0	0	0	0.58778	0.172021	0	0.465917	0	0	0.507407	-0.641458	-0.862322	0.44605	0.506066	1
CG12689	0	0	0.23446	0	0	0	0	0.246747	0	0	0.324335	-0.886428	0.079481	0.77867	1
CG12691	0	0	0	0	0	0	0	0	0	0	0	-1.30545	0	1	1
CG12692	0	0	0	0	0	0	0	0	0	0	0	-1.29072	0	1	1
CG12693	0	0	0	0	0.172021	0	0	0	0	0.253703	-0.270714	-1.03137	0.0494112	0.829654	1
CG12698	0.49922	0	0	0.58778	0.344043	0	0.232958	0	0.210741	0.253703	0.634905	-1.02949	0.46217	0.575759	1
CG12699	0	0	0	0	0	0	0	0	0	0	0	-1.23213	0	1	1
CG12702	0	0.294587	0.351689	0	0	0	0.232958	0.246747	0.421482	0	-0.163269	-0.0853266	0.025016	0.874693	1
CG12708	0	0	0.11723	0.29389	0.172021	0	0	0	0.210741	0	0.865088	-0.43545	0.438127	0.510165	1
CG1271	20.7176	21.7994	22.2737	24.099	23.0509	20.2011	23.7618	25.1682	22.3385	16.9981	0.0429509	4.47957	0.124575	0.724977	1
CG12713	2.74571	2.65128	1.40676	1.46945	2.06426	1.99517	3.26142	1.97398	2.31815	2.53703	-0.230677	1.67398	0.634095	0.428021	1
CG12715	0	0	0.11723	0	0	0	0	0	0	0	1.22021	-1.1543	1.16893	0.293262	0.948688
CG12716	0.49922	0.736467	0.937839	1.17556	1.54819	0.748188	0.931834	0.986989	0.421482	0.253703	0.54259	2.05259	1.27745	0.261473	0.948688
CG12717	15.7254	18.1171	15.4743	14.9884	16.5141	15.7119	17.006	15.2983	21.917	10.6555	0.00226032	4.23802	0.000207652	0.988536	1
CG12721	0	0	0	0	0.172021	0	0.232958	0	0.421482	0	-1.45381	-0.231704	1.01995	0.31577	0.967131
CG12723	0.24961	0	0	0	0.172021	0	0	0.246747	0	0	0.425905	-0.969256	0.110742	0.746635	1
CG12725	0	0	0	0	0	0	0	0	0.210741	0	-1.51443	-1.24748	1.99226	0.19043	0.908739
CG12728	8.73635	10.4578	14.8882	7.64114	9.80522	14.2156	18.1708	11.8439	11.1693	9.89443	-0.309711	3.68123	3.50866	0.0643999	0.804465
CG12729	0	0	0	0	0	0	0	0	0	0	0	-1.29111	0	1	1
CG1273	0	0.147293	0	0.58778	0.344043	0.249396	0.931834	0	0	0	-0.315526	-0.696323	0.113131	0.737455	1
CG12730	32.1997	36.5288	50.5261	33.2095	36.9846	57.6105	47.2906	34.0511	47.2059	37.5481	-0.22992	5.32781	3.99409	0.048776	0.787557
CG12736	38.9392	38.5909	37.9825	48.4918	39.2209	41.1503	43.7962	44.6613	38.7763	36.5333	-0.017119	5.04449	0.029039	0.865084	1
CG12744	1.99688	2.06211	3.04798	0.881669	2.58032	1.74577	2.7955	2.96097	1.68593	1.77592	0.00624061	1.30819	0.000307902	0.98604	1
CG12746	61.6537	57.5917	48.0642	60.5413	56.251	58.8574	54.9782	67.362	47.6274	59.3666	-0.0233769	5.71474	0.0774787	0.781403	1
CG1275	190.702	157.604	252.865	176.334	166.689	233.684	198.947	165.814	173.44	170.489	0.00427287	7.40053	0.00230447	0.961822	1
CG12766	3.24493	2.06211	1.28953	1.17556	3.44043	1.74577	2.09663	2.46747	1.89667	1.52222	0.192691	1.31608	0.257788	0.612926	1
CG12768	18.7208	18.8536	19.3429	14.9884	15.998	20.2011	20.7333	16.0386	16.227	19.5352	-0.068762	4.32939	0.30783	0.654685	1
CG12769	60.9049	59.5066	70.3379	50.8429	56.251	71.5766	71.9842	56.7519	59.2182	68.7536	-0.135416	5.99418	1.8508	0.177197	0.908739
CG12772	34.1966	34.7613	29.3075	32.3279	29.4157	24.4408	33.546	30.3499	29.9252	32.2203	0.0857632	4.97713	0.821745	0.367169	1
CG12773	35.6942	37.5598	40.6787	35.8546	40.425	41.3997	42.8644	33.5576	38.5656	38.8166	-0.0340103	5.3027	0.0918146	0.799527	1
CG12780	0	0	0	0	0.172021	0	0	0	0	0	1.26118	-0.973315	0.732096	0.396928	1
CG12782	0	0	0	0	0	0	0	0	0	0	0	-1.30545	0	1	1
CG12783	0.49922	0.294587	0.23446	0.58778	0.516064	0	0	0.246747	0	0.253703	1.81906	-0.39427	4.72666	0.0355897	0.716704
CG12784	0	0	0	0	0	0	0	0	0	0	0	-1.30545	0	1	1
CG12788	0	0	0	0	0	0	0	0	0	0	0	-1.30545	0	1	1
CG12795	23.9626	27.5439	22.0392	27.6256	28.5556	19.2035	21.6651	24.1812	22.76	25.624	0.191255	4.38094	2.11247	0.149694	0.908739
CG12796	0	0	0	0	0	0	0	0.246747	0	0.253703	-2.26006	-1.14165	3.67791	0.0640775	0.804465
CG12811	13.9782	15.1712	9.8473	14.9884	13.7617	10.724	17.4719	13.5711	16.8593	13.4463	-0.104986	4.03726	0.347511	0.55705	1
CG12814	61.6537	69.6698	84.9916	61.423	54.5308	76.0658	74.5467	60.6998	72.7056	81.1851	-0.131141	6.1415	1.59089	0.210564	0.925643
CG12817	10.7332	13.8456	13.9503	10.2861	11.5254	16.2107	17.2389	14.0646	14.3304	15.9833	-0.347532	4.49268	7.7466	0.00659757	0.404729
CG12818	2.4961	4.71339	2.46183	6.75947	7.56894	2.24456	4.89213	6.90893	3.16111	4.82036	0.103535	2.49872	0.113129	0.737418	1
CG12822	39.4384	36.9707	39.1548	48.7857	42.3173	40.6515	37.7393	41.4536	39.4085	39.0703	0.0545045	5.34887	0.402815	0.647383	1
CG12824	0.24961	0	0.468919	0	0.688086	0	0.232958	0	0.210741	0	1.46666	-0.590414	2.12487	0.148519	0.908739
CG12825	1.99688	2.79858	3.16521	2.35112	2.58032	4.48913	5.12509	3.20772	0.632222	2.79074	-0.291752	1.77443	0.756971	0.386668	1
CG12826	0.49922	0.294587	0	0.29389	0	0.249396	0.232958	0.246747	0	0	0.331734	-0.76485	0.0968169	0.756462	1
CG12828	0	0	0	0	0	0.249396	0.232958	0	0	0	-2.25371	-1.19932	3.77274	0.0640775	0.804465
CG12831	0	0	0	0	0	0	0	0	0	0	0	-1.20611	0	1	1
CG12836	0.24961	1.17835	0.937839	1.17556	1.03213	1.74577	0.931834	1.97398	0.842963	1.77592	-0.617548	0.544089	1.60002	0.209272	0.924383
CG12848	10.7332	13.8456	9.96453	14.1067	17.2021	10.4746	10.2502	16.2853	10.537	8.11851	0.239007	3.86631	2.58929	0.111204	0.908739
CG12849	0	0	0	0	0	0	0	0	0	0	0	-1.2908	0	1	1
CG12851	71.3885	71.29	82.1781	68.7702	70.3568	62.349	90.6209	73.5307	66.5941	88.5425	-0.0657475	6.19339	0.580399	0.448212	1
CG12853	0	0.147293	0	0	0	0	0	0	0	0	1.24615	-1.02952	1.32888	0.293262	0.948688
CG12857	0.99844	1.17835	1.05507	0.58778	1.37617	1.49638	1.39775	0.986989	0.842963	0.76111	-0.0398349	0.350386	0.00809393	0.981576	1
CG12858	361.435	311.968	432.695	340.618	334.066	391.302	412.104	343.719	349.408	374.72	-0.07103	8.51991	0.751084	0.388512	1
CG12859	80.8737	96.0353	83.4676	82.2891	87.3869	96.7656	67.325	83.6473	65.9619	63.6795	0.190624	6.16417	2.56917	0.112582	0.908739
CG12860	0	0	0	0	0	0	0	0	0	0	0	-1.22343	0	1	1
CG12861	0	0	0	0	0	0	0	0	0	0	0	-1.29807	0	1	1
CG12862	0	0	0	0	0	0	0	0	0	0	0	-1.27716	0	1	1
CG12863	9.48518	6.18633	9.0267	5.8778	9.97724	4.23973	7.68763	7.15567	6.95445	6.08888	0.339654	2.83231	3.2408	0.0752846	0.813521
CG12866	0.24961	0	0	0	0	0	0	0	0	0	1.29247	-1.27693	1.47336	0.293262	0.948688
CG12868	12.2309	12.2254	13.3642	7.64114	12.9016	16.2107	16.3071	12.5841	15.5948	12.9389	-0.316883	3.69989	3.69785	0.0577473	0.804465
CG12869	1.24805	2.65128	1.87568	2.05723	2.06426	2.74336	1.63071	1.48048	0.632222	1.52222	0.331135	0.956804	0.978336	0.325347	0.975634
CG1287	0	0.147293	0.351689	0	0.172021	0.498792	0	0	0.210741	0.507407	-0.469433	-0.51765	0.230196	0.63258	1
CG12877	20.9672	22.3886	13.5987	19.9845	22.1908	18.2059	14.6764	26.8955	15.8056	22.5796	0.0106527	4.49029	0.00408334	0.949195	1
CG1288	0	0	0	0	0	0	0	0	0	0	0	-1.29066	0	1	1
CG12880	2.74571	3.09316	4.3375	2.35112	1.89224	2.74336	2.32958	1.97398	2.52889	2.02963	0.33872	1.36513	1.22489	0.271448	0.948688
CG12883	5.99064	4.4188	4.3375	4.11446	6.53682	5.23731	3.72734	5.18169	6.11148	5.58147	-0.0293154	2.44264	0.0160756	0.899399	1
CG12885	1.49766	0.589174	1.28953	0.58778	1.20415	1.49638	2.32958	3.70121	1.0537	1.26852	-0.892585	1.28155	4.71137	0.0326823	0.695889
CG12895	29.7036	32.6992	37.0446	28.8012	31.6519	37.9082	32.1483	31.8304	27.1856	28.6685	0.0271704	4.68665	0.0553003	0.814636	1
CG12896	1.24805	2.50399	1.64122	2.64501	1.37617	2.74336	0.931834	2.46747	2.10741	2.53703	-0.199275	1.29917	0.229195	0.63332	1
CG12898	0	0	0	0	0	0	0	0	0	0	0	-1.20839	0	1	1
CG12902	0	0	0	0	0	0	0	0	0	0	0	-1.30545	0	1	1
CG12907	0	0	0	0	0	0	0	0	0	0	0	-1.30545	0	1	1
CG12909	2.4961	3.09316	1.52399	3.52668	3.61245	0.997584	2.32958	2.71422	1.47519	2.53703	0.474189	1.97551	1.69393	0.196513	0.910015
CG1291	17.4727	20.3265	18.5223	22.6295	23.911	15.4625	17.7048	23.6877	23.1815	22.0722	0.00759152	4.19737	0.00346195	0.953216	1
CG12910	10.4836	9.27949	8.79224	9.99225	9.28916	8.72886	9.08538	9.12965	9.06185	9.64073	0.0581707	4.01145	0.177554	0.761761	1
CG12911	0.99844	0.589174	0.23446	0.881669	1.03213	0.498792	0.232958	0.246747	0.632222	0.76111	0.554119	-0.0961456	0.797095	0.381057	1
CG12912	0	0	0	0	0	0	0	0	0	0	0	-1.30545	0	1	1
CG12913	28.2059	25.6291	31.7693	28.5073	25.4592	26.6854	32.8471	28.8694	27.8178	30.6981	-0.0730294	4.74976	0.573806	0.450793	1
CG12914	0	0	0.11723	0	0.172021	0	0	0	0	0	1.88882	-1.25519	2.44426	0.137192	0.908739
CG12917	0	0	0.23446	0	0	0	0	0	0	0	1.85312	-0.990932	2.35942	0.137192	0.908739
CG12920	0	0	0	0	0.172021	0	0	0	0	0.253703	-0.270723	-1.18697	0.0585159	0.829654	1
CG12923	0.24961	0.147293	0.11723	0.29389	0.172021	0.498792	0.698875	0.493495	0.632222	0	-1.27589	-0.325357	3.28385	0.0734076	0.810646
CG12926	19.22	23.7142	19.9291	21.1601	27.6955	20.2011	21.1992	26.6487	24.2352	18.2666	0.0173504	4.37645	0.0186938	0.891563	1
CG12929	4.24337	4.86068	3.75135	4.99613	4.47256	4.23973	4.19325	4.6882	3.79333	3.55185	0.116473	2.10552	0.253717	0.62106	1
CG12934	0.24961	0.147293	0	0	0	0	0.232958	0.493495	0.421482	0.253703	-1.67218	-0.656807	2.42935	0.122705	0.908739
CG12935	4.74259	3.68234	7.73717	6.17169	5.67671	8.23007	7.92059	6.90893	8.42963	6.59629	-0.434493	2.84676	4.82535	0.0306975	0.681027
CG12942	7.73791	6.03903	6.33041	9.40447	7.05288	7.23248	6.7558	6.90893	6.32222	5.07407	0.152277	3.09117	0.489172	0.494697	1
CG12945	31.4509	30.1952	43.375	30.5645	28.3835	47.1358	44.961	31.5837	39.83	43.637	-0.329371	5.34478	8.43052	0.00467331	0.3644
CG12947	7.23869	7.07009	6.21318	6.17169	7.56894	5.73611	4.65917	2.22073	6.11148	4.05925	0.579293	2.53112	7.35297	0.00806413	0.436533
CG12948	14.4774	11.047	10.7851	8.81669	13.9337	7.48188	9.5513	11.3504	11.5907	7.6111	0.30803	3.47158	4.19545	0.043541	0.758343
CG12950	128.3	118.424	170.1	122.258	119.899	137.916	150.957	127.568	124.759	150.7	-0.0679378	7.06924	0.512799	0.475844	1
CG12951	0	0	0	0	0	0	0	0	0	0	0	-1.25749	0	1	1
CG12963	0	0	0	0	0.172021	0	0.232958	0	0	0	-0.26357	-0.718971	0.0380475	0.845904	1
CG12964	0.99844	1.03105	1.1723	1.17556	1.72021	0.748188	0.465917	0.740242	0.632222	1.52222	0.574744	0.309609	2.10638	0.150276	0.908739
CG12970	0.24961	0.147293	0	0.29389	0.172021	0	0.232958	0	0.421482	0	0.064176	-0.717586	0.00299321	0.982075	1
CG12971	0	0	0.11723	0	0.172021	0	0.232958	0	0	0.253703	-0.364979	-0.916839	0.109203	0.760928	1
CG12974	0.24961	0.736467	0.586149	0.29389	0.344043	1.49638	0.232958	0.493495	0.632222	2.02963	-0.991178	0.0195064	2.24147	0.137965	0.908739
CG12975	13.7286	11.9308	11.0196	10.58	12.7296	16.7095	15.1423	9.62315	12.0122	12.4315	-0.136532	3.89906	0.822424	0.366972	1
CG12983	0	0	0	0.29389	0	0	0	0	0	0	1.30319	-1.24143	1.42792	0.293262	0.948688
CG12984	0	0	0	0.29389	0	0	0	0	0	0	1.30313	-1.23474	1.35702	0.293262	0.948688
CG12985	1.74727	1.32564	1.1723	1.17556	1.89224	1.24698	0.465917	1.23374	0.842963	1.01481	0.596	0.746813	1.95289	0.165822	0.908739
CG12986	0	0	0	0	0	0	0	0	0	0	0	-1.20795	0	1	1
CG1299	53.9158	68.6388	78.1923	67.3008	58.8313	67.5863	52.8816	62.1803	50.7885	59.874	0.160915	5.81636	1.76337	0.187671	0.908739
CG12990	0	0	0	0.29389	0	0	0.232958	0	0	0	-0.222591	-1.05847	0.0423966	0.837422	1
CG12991	103.588	92.9422	108.672	89.9303	94.4398	108.487	105.53	94.0107	100.945	108.839	-0.0796116	6.48997	0.975137	0.326135	0.97569
CG12992	1.99688	1.47293	1.52399	2.35112	1.72021	1.24698	1.16479	0.493495	1.47519	1.52222	0.577097	0.329138	1.48874	0.225702	0.942884
CG12994	20.7176	19.0009	15.2399	17.9273	19.4384	12.9686	16.773	13.3244	15.8056	13.9537	0.334142	4.10101	6.24346	0.0143405	0.539933
CG12995	0.49922	0.589174	0.23446	0.58778	1.54819	0.748188	0	0.493495	1.0537	0.507407	0.266356	-0.234583	0.147452	0.702066	1
CG12998	0.49922	0.294587	0.468919	0.29389	0.688086	0.498792	0.465917	0	0	0.253703	0.858872	-0.139538	1.08456	0.300559	0.954165
CG13000	0	0	0	0	0	0	0	0	0	0.253703	-1.53213	-1.23423	1.89179	0.19043	0.908739
CG13001	12.2309	11.047	9.73007	17.3395	11.8695	13.4674	13.2786	13.0776	9.90482	15.9833	-0.0998748	3.71005	0.506192	0.478692	1
CG13002	0	0.294587	0	0	0	0	0	0	0	0.76111	-0.847997	-0.942274	0.397058	0.530523	1
CG13003	24.961	38.2963	34.9345	23.2173	35.6084	34.1672	26.0914	28.1292	32.6648	27.1463	0.096458	4.57795	0.493421	0.484277	1
CG13004	7.4883	11.6362	8.90947	10.8739	8.60107	9.72644	14.6764	7.64917	12.8552	11.4167	-0.247888	3.66857	2.44109	0.121817	0.908739
CG13005	6.48986	6.18633	5.27534	3.52668	5.50469	6.2349	3.96029	8.8829	5.69	5.32777	-0.140547	2.58915	0.462539	0.498242	1
CG13008	0.99844	1.32564	1.40676	2.64501	1.03213	0.997584	0.931834	1.48048	1.68593	1.77592	0.0602915	1.00196	0.0235334	0.945272	1
CG13010	0.49922	0.147293	0.468919	0	0.516064	0	0	0	0.632222	0	1.15745	-0.413692	1.68165	0.198128	0.910712
CG13012	13.4789	15.1712	11.2541	13.8128	10.6653	16.4601	12.1138	9.3764	13.9089	9.64073	0.0582774	3.48127	0.1234	0.747869	1
CG13014	5.49142	5.30257	7.38548	4.99613	4.64458	8.72886	6.05692	9.12965	6.32222	6.59629	-0.382195	2.7176	3.40332	0.0684614	0.804465
CG13016	10.234	7.07009	9.61284	8.5228	12.2135	12.2204	13.5116	9.3764	11.8015	8.87962	-0.229484	3.28829	1.62173	0.206236	0.919677
CG13018	4.74259	5.59715	3.16521	7.64114	4.98862	3.24215	3.26142	6.66218	6.32222	5.32777	0.0382144	2.20517	0.0234845	0.878558	1
CG13021	0	0	0	0	0	0	0	0	0	0	0	-1.19947	0	1	1
CG13022	3.99376	4.12422	3.75135	2.64501	5.33267	4.23973	3.49438	3.20772	4.00407	4.05925	0.0802971	2.19113	0.0937536	0.760189	1
CG13023	0.99844	1.62023	1.40676	1.17556	1.54819	1.49638	1.63071	1.23374	1.89667	0.507407	0.00833468	0.262667	0.000344467	0.985235	1
CG13024	5.49142	8.24843	9.73007	7.34725	7.39692	7.73127	7.45467	8.38941	6.7437	6.84999	0.0629531	2.98261	0.125374	0.724132	1
CG13025	15.4758	12.2254	13.5987	10.8739	11.8695	10.724	10.949	10.6101	10.537	11.1629	0.247872	3.4409	1.77429	0.186324	0.908739
CG13026	6.24025	10.1632	22.1564	8.5228	11.0094	13.218	5.82396	5.67519	5.26852	8.11851	0.653956	2.83306	5.34543	0.0231338	0.635903
CG13028	0	0.294587	0	0	0	0	0.232958	0	0	0	0.374118	-1.21293	0.108877	0.746635	1
CG13029	0	0	0	0	0	0	0	0	0	0.253703	-1.53206	-1.16892	2.07436	0.19043	0.908739
CG13031	0.24961	0	0	0	0.172021	0	0.232958	0	0	0	0.432016	-1.15352	0.125112	0.746635	1
CG13032	0.24961	0.294587	0.11723	0.58778	0	0	0.232958	0.740242	0.421482	0.253703	-0.541206	-0.666681	0.382553	0.538015	1
CG13033	0	0	0	0	0	0	0	0	0	0	0	-1.1124	0	1	1
CG13038	0	0.147293	0.11723	0.29389	0	0.249396	0.232958	0	0	0	0.117642	-0.731458	0.0112762	0.915701	1
CG13039	0	0	0	0	0	0	0	0	0	0	0	-1.30545	0	1	1
CG1304	0	0	0	0	0	0	0	0	0	0	0	-1.13041	0	1	1
CG13040	0	0	0	0	0	0	0	0.246747	0	0	-1.52965	-1.24777	1.98923	0.19043	0.908739
CG13041	0	0.147293	0.23446	0	0	0	0	0	0.210741	0.253703	0.0555466	-0.824135	0.00329935	0.954339	1
CG13042	0	0.589174	0	0	0	0.249396	0.465917	0	0.210741	0.253703	-0.692787	-0.57349	0.547813	0.461201	1
CG13043	0.49922	1.03105	1.64122	0.881669	1.37617	0	0.698875	0.740242	1.26444	0.253703	0.871555	0.651828	1.81539	0.181355	0.908739
CG13044	0	0.294587	2.93075	0.29389	1.37617	0.249396	0	0.493495	0	0.507407	2.07832	0.296861	5.13306	0.0260726	0.658322
CG13045	0	0	0	0	0	0	0.232958	0	0	0	-1.52431	-1.22163	1.95414	0.19043	0.908739
CG13046	3.24493	2.94587	2.22737	0.881669	2.92436	3.49154	3.02846	3.45446	1.89667	2.79074	-0.229805	1.21909	0.487715	0.486807	1
CG13047	0.24961	0	0.11723	0.29389	0.344043	0.249396	0.232958	0.493495	0.210741	0	-0.340542	-0.913246	0.15474	0.695007	1
CG13048	0	0	0	0	0	0	0	0	0	0	0	-1.27753	0	1	1
CG13049	0	0.147293	0.11723	0	0.172021	0.249396	0.232958	0	0	0	0.0810832	-0.996379	0.00674776	0.934739	1
CG13050	0	0	0	0	0	0	0	0	0	0	0	-1.29936	0	1	1
CG13051	0.74883	0.883761	0.586149	0	0.344043	0.249396	0.465917	0.493495	0.210741	0.76111	0.31354	-0.249509	0.220997	0.639455	1
CG13053	0	0.294587	0	0	0	0	0.232958	0.493495	0	0	-0.836908	-0.918142	0.532392	0.467653	1
CG13054	1.99688	1.91482	1.87568	1.76334	1.89224	2.24456	2.09663	1.97398	2.10741	1.01481	-0.00263231	1.39639	7.15097e-05	0.993272	1
CG13055	3.49454	3.53504	3.39966	3.82057	2.75234	1.99517	4.19325	4.1947	4.84704	5.32777	-0.285364	2.57197	1.52552	0.220105	0.936873
CG13056	0.74883	0.589174	1.05507	0	0.344043	1.49638	0.931834	0.986989	0.842963	0.507407	-0.659075	0.0565903	1.40878	0.238483	0.948688
CG13058	0.24961	0.147293	0	0.29389	0	0.249396	0	0	0	0.507407	-0.311401	-1.05371	0.10767	0.743725	1
CG13059	0	0	0.23446	0	0.172021	0	0.232958	0.246747	0	0.253703	-0.424301	-0.93312	0.170886	0.709414	1
CG13060	0.24961	0	0.11723	0	0	0	0	0	0	0.253703	0.385797	-1.18113	0.126384	0.746635	1
CG13062	0.24961	0.44188	0.11723	0	0.516064	0	0	0.740242	0.632222	0	-0.0150491	-0.196052	0.00035057	0.985104	1
CG13063	0	0	0.23446	0	0	0	0	0	0	0	1.85129	-1.21183	2.44389	0.137192	0.908739
CG13064	0	0	0	0	0	0	0	0	0	0	0	-1.25512	0	1	1
CG13065	0	0	0.23446	0	0	0	0	0	0	0	1.85303	-1.00364	2.42025	0.137192	0.908739
CG13066	0	0	0.11723	0	0.344043	0	0	0	0	0	2.34717	-1.21547	3.88839	0.0687019	0.804465
CG13067	18.4711	24.598	30.3625	17.3395	22.8789	29.4287	19.3356	28.1292	24.6567	14.2074	-0.00938388	3.99454	0.00280755	0.957864	1
CG13068	0.74883	0.736467	0.468919	0.58778	0.860107	0.997584	0.465917	0.740242	1.26444	0.76111	-0.320522	-0.346767	0.326947	0.568934	1
CG13069	0.99844	0.589174	0.468919	1.17556	0.688086	1.24698	0.698875	0	0.632222	0	0.494921	-0.235619	0.565751	0.453979	1
CG1307	26.4587	27.5439	23.5632	28.8012	29.7597	21.6974	24.6936	27.389	30.9789	24.6092	0.0677063	4.88922	0.285181	0.607151	1
CG13070	0	0	0	0.29389	0	0	0	0	0	0	1.3034	-1.26296	1.23196	0.293262	0.948688
CG13071	10.9828	14.1402	15.1226	13.225	16.8581	19.4529	15.1423	17.5191	16.0163	12.1778	-0.181453	3.35607	0.929649	0.337621	0.980666
CG13073	0.99844	0	0.703379	0.29389	0	0.498792	0.465917	0	0.632222	0.507407	-0.129359	-0.613091	0.0294349	0.864176	1
CG13074	0.49922	0.147293	0.23446	0	0	0.498792	0.232958	0	0	0.253703	-0.115134	-0.562265	0.015994	0.903217	1
CG13075	0	0.147293	0.23446	0.881669	0	0.249396	0	0	0	0	1.74301	-0.741611	2.76354	0.106851	0.908739
CG13077	59.9064	45.661	58.3804	52.3124	51.0904	53.6201	49.3872	50.8299	50.7885	49.2185	0.073919	5.35061	0.372437	0.543266	1
CG13078	0	0	0	0	0	0	0	0	0	0	0	-1.19265	0	1	1
CG13081	0	0	0	0	0	0.249396	0	0	0	0	-1.53043	-0.998734	2.65482	0.19043	0.908739
CG13082	4.9922	5.59715	6.33041	6.17169	5.50469	3.24215	2.32958	2.22073	2.52889	2.02963	1.2058	2.22543	15.362	0.000176204	0.0601502
CG13083	0	0	0	0	0	0	0	0	0	0	0	0.61937	0	1	1
CG13084	0	0	0	0.29389	0.172021	0	0	0	0	0	1.94668	0.420458	1.77975	0.186208	0.908739
CG13085	0.49922	0.736467	0.703379	1.17556	0.688086	0.249396	0.698875	0.246747	0.421482	1.26852	0.364994	0.464311	0.572434	0.476866	1
CG13086	1.24805	2.3567	1.64122	2.05723	4.98862	1.24698	3.26142	1.72723	3.58259	1.26852	0.143181	2.25365	0.0953154	0.758262	1
CG13088	2.4961	4.5661	4.57196	3.23279	3.26841	3.99033	4.65917	5.18169	4.6363	6.34258	-0.412597	2.17693	3.37851	0.069621	0.807035
CG1309	78.128	87.4923	117.347	89.3425	93.7517	114.972	90.8538	87.1018	91.2508	87.0203	-0.0120169	6.36573	0.0184654	0.892224	1
CG13090	10.234	9.1322	8.20609	12.9312	9.97724	9.72644	6.7558	8.14266	10.537	8.11851	0.198896	3.19044	1.43349	0.281375	0.948688
CG13091	0	0	0	0	0	0.249396	0	0	0	0	-1.53053	-1.13883	1.81758	0.19043	0.908739
CG13096	8.98596	10.016	4.10304	10.8739	8.77309	7.23248	8.61946	9.62315	9.27259	5.32777	0.055108	3.52015	0.0443374	0.833718	1
CG13097	11.2325	11.6362	5.97872	11.4617	9.11714	4.23973	9.08538	16.7788	10.3263	7.10369	0.0297985	3.64396	0.0146241	0.904025	1
CG13101	10.7332	12.3727	19.6946	8.22891	8.94512	17.7071	12.1138	10.6101	12.223	11.4167	-0.0625658	3.27198	0.0817655	0.775597	1
CG13102	0	0.147293	0.11723	0	0	0	0	0	0	0	1.87637	-0.893564	2.41136	0.137192	0.908739
CG13108	13.2293	15.9077	8.08886	19.1028	21.5027	6.98309	10.4831	18.9995	11.38	13.1926	0.335073	3.94586	2.81392	0.0970319	0.885126
CG1311	44.6802	40.2111	64.7109	40.8507	40.081	58.608	58.7055	43.921	40.0407	44.1444	-0.0821526	5.59418	0.502806	0.729507	1
CG13110	0	0	0	0	0	0	0	0	0	0	0	-1.30545	0	1	1
CG13113	0	0	0	0	0	0	0	0	0	0	0	-1.06921	0	1	1
CG13114	0	0	0.11723	0	0.172021	0	0.232958	0	0.210741	0	-0.347088	-0.444282	0.0688482	0.793739	1
CG13116	23.4633	19.59	28.3696	19.9845	22.7068	24.6902	21.1992	21.467	21.917	21.8185	0.0458618	4.35128	0.115059	0.735273	1
CG13117	47.6755	51.1108	51.4639	62.0108	60.8956	51.625	43.3303	56.5051	53.7389	51.2481	0.0890833	5.74924	0.741666	0.39149	1
CG13123	4.24337	4.27151	3.16521	4.11446	2.92436	3.99033	2.56254	4.44145	4.6363	3.29814	-0.0334065	2.02766	0.0174485	0.895215	1
CG13124	429.829	451.16	434.571	393.812	401.154	565.131	497.832	462.158	413.473	469.098	-0.189642	8.60158	5.87286	0.0174437	0.593052
CG13126	9.23557	14.5821	13.3642	12.0495	13.0736	14.2156	13.9775	12.8309	13.0659	14.7148	-0.12887	3.68289	1.23897	0.402618	1
CG13127	0	0	0	0	0	0	0	0	0	0	0	-1.30545	0	1	1
CG13131	0	0	0	0	0	0	0	0	0	0	0	-1.28377	0	1	1
CG13133	0.24961	6.7755	0.11723	0	3.61245	12.9686	0.465917	2.46747	0	0.507407	-0.439304	2.83977	0.301131	0.584577	1
CG13135	0	0	0	0.29389	0	0	0	0	0	0	1.30315	-1.23722	1.31508	0.293262	0.948688
CG13137	0.24961	0.147293	0	0	0	0	0	0	0	0.253703	0.409898	-1.20792	0.13573	0.746635	1
CG13138	0	0	0.11723	0	0	0	0	0	0	0	1.22024	-1.14913	1.34678	0.293262	0.948688
CG1314	0.24961	0	0.11723	0.29389	0.172021	0.249396	0	0	0	0	1.22822	-1.02484	1.21469	0.28807	0.948688
CG13142	7.23869	6.03903	8.44055	7.34725	6.70884	6.98309	11.415	5.67519	6.95445	6.59629	-0.0729782	3.14287	0.156144	0.693697	1
CG13144	0.74883	2.2094	0.937839	0.881669	1.89224	0.748188	1.39775	1.23374	1.26444	1.01481	0.27045	1.02906	0.332398	0.565736	1
CG13148	6.98908	6.62821	5.27534	9.40447	10.6653	6.73369	7.45467	7.15567	6.53296	8.11851	0.0962232	2.91461	0.231083	0.746024	1
CG1315	1.74727	6.03903	1.75845	2.05723	5.33267	0.997584	2.56254	3.70121	6.32222	1.77592	0.156081	2.82227	0.132588	0.716646	1
CG13151	9.48518	5.30257	3.51689	8.81669	4.8166	3.49154	3.26142	7.89591	5.69	5.32777	0.254353	2.74104	1.28185	0.416503	1
CG13154	0	0	0	0	0.172021	0	0	0	0.210741	0	-0.253598	-1.02273	0.0421924	0.837755	1
CG13155	0	0	0	0	0	0	0.232958	0	0	0.253703	-2.25516	-1.21435	4.29067	0.0640775	0.804465
CG13157	0	0	0	0	0	0	0	0	0	0	0	-1.30545	0	1	1
CG13159	0	0	0	0	0	0	0	0	0	0	0	-1.11158	0	1	1
CG1316	168.986	189.419	152.75	188.677	200.749	150.136	164.236	187.775	155.105	169.22	0.123501	7.44342	2.76622	0.0998647	0.897042
CG13160	0	0	0	0	0	0	0	0	0	0	0	-1.17032	0	1	1
CG13163	4.9922	7.95385	6.56487	7.93503	9.28916	6.2349	6.98875	6.90893	6.53296	8.37221	0.0750599	3.11214	0.201875	0.654327	1
CG13168	2.24649	2.79858	1.52399	1.17556	4.30054	2.24456	2.56254	3.45446	1.0537	1.26852	0.21518	1.40823	0.43227	0.512609	1
CG1317	263.588	210.188	296.709	231.291	238.422	258.374	246.936	208.008	232.658	229.348	0.0779857	7.71275	1.16743	0.282909	0.948688
CG13170	0.24961	0	0	0	0	0	0.232958	0.246747	0	0.253703	-1.44683	-1.12944	1.76846	0.188676	0.908739
CG13171	0	0	0	0	0	0	0	0	0	0	0	-1.28406	0	1	1
CG13175	0	0	0	0	0	0	0	0	0	0	0	-1.30545	0	1	1
CG13177	0.24961	2.3567	0	0	0	0.249396	1.63071	1.48048	0.210741	1.26852	-0.701324	0.972399	0.401707	0.527869	1
CG13178	1.24805	0.736467	1.05507	1.46945	0.344043	1.74577	1.16479	0.493495	0.421482	1.01481	-0.0390347	0.821126	0.00552663	0.940909	1
CG13183	1.24805	1.76752	0.820609	2.05723	1.37617	0.997584	0.931834	0.740242	0.421482	1.52222	0.623202	0.758494	2.24709	0.137479	0.908739
CG13185	33.6974	30.9316	31.1831	37.0301	24.9431	26.436	34.0119	28.6227	31.6111	29.937	0.0589536	5.11366	0.115344	0.734957	1
CG13186	0	0.147293	0	0	0.172021	0	0	0	0	0	1.91278	-1.27663	2.81296	0.137192	0.908739
CG13188	5.99064	3.97692	6.33041	4.40835	4.98862	6.73369	6.7558	3.94796	5.90074	5.32777	-0.151199	3.11898	0.555316	0.458158	1
CG1319	21.2169	22.8305	28.4868	25.2745	24.5991	29.9275	27.0232	25.415	24.0244	19.7889	-0.0394774	4.64228	0.123785	0.840632	1
CG13192	14.2278	15.9077	16.2949	12.3434	14.6218	23.942	20.2674	16.5321	16.227	14.9685	-0.312612	3.86303	4.83098	0.0306029	0.681027
CG13193	0.24961	0.147293	0	0	0	0	0	0	0	0	1.94186	-1.17318	2.79291	0.137192	0.908739
CG13196	0.24961	0	0	0	0	0	0	0.246747	0	0.253703	-0.968043	-1.22705	0.803769	0.398093	1
CG13197	26.7083	29.0168	33.4105	30.5645	30.4478	35.1648	28.4209	37.9991	30.1359	30.1907	-0.104399	5.01902	1.2163	0.273123	0.948688
CG13198	0	0.294587	0.11723	0	0	0	0	0	0	0	2.32105	-1.11478	3.55259	0.0687019	0.804465
[truncated: 14,728 more rows]
