# Supplementary material for: Experimentally induced active and quiet sleep engage non-overlapping transcriptional programs in Drosophila
Source: bioRxiv preprint, doi:10.1101/2023.04.03.535331, version 3 (2023-10-15)
Supplement: Figure7-source data 3 [file 535331_file21.xlsx]

## Sheet: Signif Opto ATR 1-10hr
R23E10Gal4 > UASChrimson +ATR (10hours) vs +ATR (1hour)
Downregulated			Upregulated
Gene Name	Log2Fold Change	qFDR	Gene Name	Log2Fold Change	qFDR
PGRP-SC2	-6.828	0.048	HIP-R	0.582	0.009
Cyp304a1	-5.571	0.004	eys	0.583	0
CG43175	-5.418	0.001	Arl4	0.587	0.008
CR44149	-3.887	0.047	CG31710	0.59	0.019
Cyp309a1	-3.701	0.001	CG6175	0.593	0
CG42825	-3.325	0.048	Aats-cys	0.595	0
CG32368	-3.136	0	Aats-asn	0.608	0
CG13641	-2.911	0.009	DopEcR	0.617	0
CG33926	-2.885	0.021	mei-P26	0.625	0.026
Jhe	-2.394	0	CR44024	0.629	0.017
CG9497	-2.291	0.046	Uhg5	0.63	0.017
CG34180	-2.241	0	Aats-val	0.631	0
CG11843	-1.984	0.015	MED26	0.636	0.009
CG9512	-1.765	0	Ire1	0.641	0
CG18031	-1.69	0	Bka	0.644	0.018
CG10513	-1.567	0	CG9393	0.645	0
CG32801	-1.515	0.008	Ack	0.647	0
CG9701	-1.5	0	nct	0.65	0
Ugt35b	-1.484	0	rho	0.65	0
CG11796	-1.455	0	HisCl1	0.651	0
CG11453	-1.45	0.026	Nipped-A	0.653	0.009
Cyp6a21	-1.449	0	Nipped-B	0.658	0.012
CG14257	-1.436	0	Hmgs	0.661	0
CG8170	-1.414	0	CG12910	0.665	0
Ugt86De	-1.412	0.012	CG30118	0.666	0
topi	-1.407	0.037	CG42588	0.669	0
CG33784	-1.398	0.032	Hr46	0.671	0.002
Cpr72Ec	-1.35	0	CG40467	0.686	0.01
CG10553	-1.329	0	Crg-1	0.697	0.002
Est-6	-1.326	0	Aats-lys	0.699	0
Cyp312a1	-1.287	0.008	Uhg4	0.702	0.03
ple	-1.221	0	CG33977	0.705	0.047
CG31205	-1.206	0	pyd	0.711	0
CG16978	-1.132	0.01	Gclm	0.719	0
Pdh	-1.123	0	Haspin	0.728	0.021
Clk	-1.112	0	Gp210	0.734	0
CG11407	-1.047	0	CG10979	0.745	0
CG42329	-1.038	0.016	Atf6	0.747	0.009
CG10514	-1.021	0	CG13618	0.751	0.001
swi2	-0.994	0.017	ninaG	0.753	0
CG3505	-0.99	0.005	Sug	0.756	0
Hsp68	-0.982	0.001	CG8468	0.764	0
CG17005	-0.975	0.001	CG4407	0.764	0
CG7079	-0.97	0	CG33635	0.765	0.016
CG7724	-0.959	0	CG17724	0.766	0.002
CG12268	-0.953	0.009	l(2)41Ab	0.769	0.014
CG13305	-0.952	0	CG14186	0.773	0
Dip-B	-0.949	0	CG11537	0.776	0
CG5613	-0.924	0.002	CG2017	0.776	0
Hsp83	-0.88	0	Cnx99A	0.784	0
CG8757	-0.85	0.036	CG5789	0.793	0
inaD	-0.847	0.001	bor	0.8	0
Osi24	-0.843	0.045	eIF2B-epsilon	0.809	0
Jheh1	-0.841	0	CG14880	0.811	0
CG15021	-0.836	0.026	CR32111	0.813	0
CG11951	-0.815	0.005	Aats-his	0.828	0
CR44179	-0.807	0.023	Uhg3	0.833	0.022
CG6472	-0.799	0.016	CG15100	0.843	0
verm	-0.79	0.005	Kif3C	0.848	0.002
Cpr67B	-0.782	0	Side	0.861	0
CG17324	-0.78	0.02	trbl	0.862	0
CG13833	-0.779	0.003	CG4186	0.862	0.025
gb	-0.773	0	dgt2	0.868	0.001
CG1461	-0.769	0	Slob	0.89	0
CG31189	-0.768	0.013	CR43957	0.893	0.045
CG14742	-0.763	0.009	Aats-ala	0.894	0
CG42331	-0.762	0.03	mino	0.895	0
betaTub97EF	-0.744	0	CG9505	0.903	0
e	-0.731	0.001	CG30109	0.903	0
CG15629	-0.726	0.007	Rpb12	0.903	0
CG34330	-0.724	0.023	CG10778	0.946	0
CG31676	-0.723	0	CG41343	0.976	0.005
CG5945	-0.713	0.002	Aats-glupro	0.987	0
Ugt86Da	-0.706	0	dnr1	1.002	0
CG7497	-0.706	0.011	CG5535	1.009	0
CG16959	-0.701	0.003	CG8034	1.023	0
CG34134	-0.699	0	CG2681	1.045	0
CG5118	-0.695	0.037	Nmdmc	1.05	0
CG43093	-0.682	0.031	CG3476	1.052	0
Jheh2	-0.68	0	O-fut1	1.056	0
Cyp6a23	-0.671	0.001	Hrs	1.074	0
Cyp4aa1	-0.665	0.026	Lasp	1.087	0.001
retinin	-0.661	0.022	cwo	1.175	0
Stam	-0.661	0	Uhg1	1.209	0
Cyp6a17	-0.656	0.018	Pdp1	1.223	0
CG1441	-0.655	0.015	mia	1.234	0
CG32407	-0.654	0	Myo28B1	1.246	0
CG6836	-0.651	0.001	CG34138	1.25	0
Hr38	-0.645	0.001	Uhg2	1.253	0
CG10560	-0.641	0.017	CG33217	1.312	0.012
GstZ2	-0.637	0.001	CG33123	1.368	0
CG11652	-0.63	0	Aats-ile	1.39	0
CG18522	-0.629	0.008	CG31324	1.39	0
CG31036	-0.623	0	CG17219	1.4	0.024
Rh2	-0.612	0.023	Dgp-1	1.462	0
pinta	-0.603	0	JhI-21	1.468	0
fw	-0.601	0.001	Mco1	1.505	0
qsm	-0.6	0	CG5646	1.543	0
CG1213	-0.598	0.003	CG10268	1.559	0
wac	-0.588	0	gol	1.631	0
CG31207	-0.588	0.004	CG9305	1.637	0
			slam	1.656	0
			CG2556	1.699	0
			CG33199	1.751	0.009
			Ubpy	1.831	0
			CG9760	1.88	0
			CR44470	2.155	0.007
			CG31918	2.171	0
			CR45566	2.417	0
			CG17931	2.532	0
			CG31954	2.573	0.011
			CG6808	2.621	0
			vri	2.623	0
			dy	2.78	0
			per	3	0
			cyr	3.066	0
			tim	3.155	0
			CG13694	3.236	0.0497
			CR40963	5.483	0

## Sheet: All genes
Row.names	dm13_1	dm13_2	dm13_3	dm13_4	dm13_5	dm15_1	dm15_2	dm15_3	dm15_4	dm15_5	logFC	logCPM	F	PValue	FDR
128up	19.4696	20.9157	17.8189	23.5112	22.0187	18.5941	22.8146	22.1545	22.4595	22.1608	-0.0635228	4.49957	0.276032	0.600647	1
140up	11.7317	14.7293	17.2328	17.0456	15.654	13.354	13.6087	10.4502	12.7548	15.0816	0.235885	3.85757	3.47234	0.0657698	0.506543
14-3-3epsilon	508.206	528.194	467.747	550.456	570.595	561.543	573.368	564.521	554.554	573.41	-0.10724	9.19045	1.6575	0.201349	0.747441
14-3-3zeta	1422.28	1428.3	1541.57	1436.83	1462.18	1685.81	1754.33	1572.55	1647.58	1568.49	-0.174516	10.6062	5.52211	0.0210361	0.282433
18w	40.1872	50.0798	40.9132	38.4996	41.9732	43.7807	34.222	53.0871	41.037	35.0879	0.0308115	5.44024	0.0558868	0.813674	1
26-29-p	97.3479	97.9502	81.4747	96.102	90.8273	77.9263	78.4503	91.753	87.6196	87.7197	0.130524	6.83069	0.81164	0.370118	0.91218
2mit	153.011	138.456	163.653	134.602	131.768	160.248	165.306	150.692	171.912	141.583	-0.129957	7.24247	2.16049	0.145199	0.694922
312	15.2262	13.2564	15.5916	14.1067	13.7617	13.354	11.8076	15.0483	17.1912	13.5427	0.025891	3.92417	0.0437676	0.834775	1
4EHP	160.749	138.75	173.383	151.647	152.239	178.504	186.92	163.442	173.853	174.824	-0.175809	7.43629	3.07537	0.0830012	0.547677
4E-T	120.062	110.176	164.356	100.804	100.116	139.287	143.492	135.644	143.907	117.575	-0.188496	6.98591	3.18236	0.0779167	0.531649
5.8SrRNA:CR40454	12.4805	12.9618	13.9503	35.8546	4.98862	6.59247	6.20398	3.34407	6.93193	194.83	-1.43185	5.96192	1.15725	0.285004	0.811804
5-HT1A	68.8924	64.0727	63.0696	61.7169	59.8635	65.2485	63.4407	64.1644	61.8328	68.0212	-0.0231619	6.06899	0.0647509	0.799738	1
5-HT1B	28.4556	33.2883	37.0446	28.8012	31.3079	37.8644	43.2277	38.6658	45.4735	36.319	-0.334616	5.22628	9.94812	0.00220939	0.0693367
5-HT2A	117.816	108.703	151.109	121.083	117.835	137.597	139.089	127.493	136.143	106.495	-0.0691975	6.94023	0.553139	0.459038	0.980405
5-HT2B	30.4524	27.102	36.6929	28.2134	28.2115	33.9766	33.0212	29.8876	25.2322	29.5477	-0.0100092	4.83607	0.00678539	0.967459	1
5-HT7	31.4509	28.7222	38.0997	25.5684	25.9752	37.0192	36.2232	31.5597	33.2733	37.5502	-0.221565	4.86802	4.70072	0.0328748	0.354772
5PtaseI	88.8612	78.9493	90.5014	89.6364	79.1299	82.6594	87.256	84.0198	84.2923	77.2549	0.0379633	6.45989	0.318248	0.574111	1
5SrRNA:CR33353	0	0	0	0	0	0	0	0	0	0	0	-1.30545	0	1	1
5SrRNA:CR33354	0	0	0	0	0	0	0	0	0	0	0	-1.30545	0	1	1
5SrRNA:CR33355	0	0	0	0	0	0	0	0	0	0	0	-1.30545	0	1	1
5SrRNA:CR33357	0	0	0	0	0	0	0	0	0	0	0	-1.30545	0	1	1
5SrRNA:CR33358	0	0	0	0	0	0	0	0	0	0	0	-1.30545	0	1	1
5SrRNA:CR33359	0	0	0	0	0	0	0	0	0	0	0	-1.30545	0	1	1
5SrRNA:CR33360	0	0	0	0	0	0	0	0	0	0	0	-1.30545	0	1	1
5SrRNA:CR33361	0	0	0	0	0	0	0	0	0	0	0	-1.30545	0	1	1
5SrRNA:CR33362	0	0	0	0	0	0	0	0	0	0	0	-1.30545	0	1	1
5SrRNA:CR33364	0	0	0	0	0	0	0	0	0	0	0	-1.30545	0	1	1
5SrRNA:CR33365	0	0	0	0	0	0	0	0	0	0	0	-1.30545	0	1	1
5SrRNA:CR33366	0	0	0	0	0	0	0	0	0	0	0	-1.30545	0	1	1
5SrRNA:CR33367	0	0	0	0	0.172021	0	0	0	0.277277	0	-0.222529	-1.06526	0.0246407	0.875839	1
5SrRNA:CR33368	0	0	0	0	0	0	0	0	0	0	0	-1.30545	0	1	1
5SrRNA:CR33369	0	0	0	0	0	0	0	0	0	0	0	-1.30545	0	1	1
5SrRNA:CR33370	0	0	0	0	0	0	0	0	0	0	0	-1.30545	0	1	1
5SrRNA:CR33372	0	0	0	0	0	0	0	0	0	0	0	-1.30545	0	1	1
5SrRNA:CR33373	0	0	0	0	0	0	0	0	0	0	0	-1.30545	0	1	1
5SrRNA:CR33374	0	0	0	0	0	0	0	0	0	0	0	-1.30545	0	1	1
5SrRNA:CR33375	0	0	0	0	0	0	0	0	0	0	0	-1.30545	0	1	1
5SrRNA:CR33376	0	0	0	0	0	0	0	0	0	0	0	-1.30545	0	1	1
5SrRNA:CR33377	0	0	0	0	0	0	0	0	0	0	0	-1.30545	0	1	1
5SrRNA:CR33378	0	0	0	0	0	0	0	0	0	0	0	-1.30545	0	1	1
5SrRNA:CR33379	0	0	0	0	0	0	0	0	0	0	0	-1.30545	0	1	1
5SrRNA:CR33380	0	0	0	0	0	0	0	0	0	0	0	-1.30545	0	1	1
5SrRNA:CR33381	0	0	0	0	0	0	0	0	0	0	0	-1.30545	0	1	1
5SrRNA:CR33382	0	0	0	0	0	0	0	0	0	0	0	-1.30545	0	1	1
5SrRNA:CR33383	0	0	0	0	0	0	0	0	0	0	0	-1.30545	0	1	1
5SrRNA:CR33384	0	0	0	0	0	0	0	0	0	0	0	-1.30545	0	1	1
5SrRNA:CR33385	0	0	0	0	0	0	0	0	0	0	0	-1.30545	0	1	1
5SrRNA:CR33386	0	0	0	0	0	0	0	0	0	0	0	-1.30545	0	1	1
5SrRNA:CR33387	0	0	0	0	0	0	0	0	0	0	0	-1.30545	0	1	1
5SrRNA:CR33388	0	0	0	0	0	0	0	0	0	0	0	-1.30545	0	1	1
5SrRNA:CR33389	0	0	0	0	0	0	0	0	0	0	0	-1.30545	0	1	1
5SrRNA:CR33390	0	0	0	0	0	0	0	0	0	0	0	-1.30545	0	1	1
5SrRNA:CR33391	0	0	0	0	0	0	0	0	0	0	0	-1.30545	0	1	1
5SrRNA:CR33392	0	0	0	0	0	0	0	0	0	0	0	-1.30545	0	1	1
5SrRNA:CR33393	0	0	0	0	0	0	0	0	0	0	0	-1.30545	0	1	1
5SrRNA:CR33394	0	0	0	0	0	0	0	0	0	0	0	-1.30545	0	1	1
5SrRNA:CR33395	0	0	0	0	0	0	0	0	0	0	0	-1.30545	0	1	1
5SrRNA:CR33396	0	0	0	0	0	0	0	0	0	0	0	-1.30545	0	1	1
5SrRNA:CR33397	0	0	0	0	0	0	0	0	0	0	0	-1.30545	0	1	1
5SrRNA:CR33398	0	0	0	0	0	0	0	0	0	0	0	-1.30545	0	1	1
5SrRNA:CR33399	0	0	0	0	0	0	0	0	0	0	0	-1.30545	0	1	1
5SrRNA:CR33400	0	0	0	0	0	0	0	0	0	0	0	-1.30545	0	1	1
5SrRNA:CR33401	0	0	0	0	0	0	0	0	0	0	0	-1.30545	0	1	1
5SrRNA:CR33402	0	0	0	0	0	0	0	0	0	0	0	-1.30545	0	1	1
5SrRNA:CR33403	0	0	0	0	0	0	0	0	0	0	0	-1.30545	0	1	1
5SrRNA:CR33404	0	0	0	0	0	0	0	0	0	0	0	-1.30545	0	1	1
5SrRNA:CR33405	0	0	0	0	0	0	0	0	0	0	0	-1.30545	0	1	1
5SrRNA:CR33406	0	0	0	0	0	0	0	0	0	0	0	-1.30545	0	1	1
5SrRNA:CR33407	0	0	0	0	0	0	0	0	0	0	0	-1.30545	0	1	1
5SrRNA:CR33408	0	0	0	0	0	0	0	0	0	0	0	-1.30545	0	1	1
5SrRNA:CR33409	0	0	0	0	0	0	0	0	0	0	0	-1.30545	0	1	1
5SrRNA:CR33410	0	0	0	0	0	0	0	0	0	0	0	-1.30545	0	1	1
5SrRNA:CR33411	0	0	0	0	0	0	0	0	0	0	0	-1.30545	0	1	1
5SrRNA:CR33412	0	0	0	0	0	0	0	0	0	0	0	-1.30545	0	1	1
5SrRNA:CR33413	0	0	0	0	0	0	0	0	0	0	0	-1.30545	0	1	1
5SrRNA:CR33414	0	0	0	0	0	0	0	0	0	0	0	-1.30545	0	1	1
5SrRNA:CR33415	0	0	0	0	0	0	0	0	0	0	0	-1.30545	0	1	1
5SrRNA:CR33417	0	0	0	0	0	0	0	0	0	0	0	-1.30545	0	1	1
5SrRNA:CR33418	0	0	0	0	0	0	0	0	0	0	0	-1.30545	0	1	1
5SrRNA:CR33419	0	0	0	0	0	0	0	0	0	0	0	-1.30545	0	1	1
5SrRNA:CR33420	0	0	0	0	0	0	0	0	0	0	0	-1.30545	0	1	1
5SrRNA:CR33421	0	0	0	0	0	0	0	0	0	0	0	-1.30545	0	1	1
5SrRNA:CR33422	0	0	0	0	0	0	0	0	0	0	0	-1.30545	0	1	1
5SrRNA:CR33423	0	0	0	0	0	0	0	0	0	0	0	-1.30545	0	1	1
5SrRNA:CR33424	0	0	0	0	0	0	0	0	0	0	0	-1.30545	0	1	1
5SrRNA:CR33425	0	0	0	0	0	0	0	0	0	0	0	-1.30545	0	1	1
5SrRNA:CR33426	0	0	0	0	0	0	0	0	0	0	0	-1.30545	0	1	1
5SrRNA:CR33427	0	0	0	0	0	0	0	0	0	0	0	-1.30545	0	1	1
5SrRNA:CR33428	0	0	0	0	0	0	0	0	0	0	0	-1.21544	0	1	1
5SrRNA:CR33429	0	0	0	0	0	0	0	0	0	0	0	-1.30545	0	1	1
5SrRNA:CR33430	0	0	0	0	0	0	0	0	0	0	0	-1.30545	0	1	1
5SrRNA:CR33431	0	0	0	0	0	0	0	0	0	0	0	-1.30545	0	1	1
5SrRNA:CR33432	0	0	0	0	0	0	0	0	0	0	0	-1.30545	0	1	1
5SrRNA:CR33433	0	0	0	0	0	0	0	0	0	0	0	-1.30545	0	1	1
5SrRNA:CR33434	0	0	0	0	0	0	0	0	0	0	0	-1.30545	0	1	1
5SrRNA:CR33435	0	0	0	0	0	0	0	0	0	0	0	-1.30545	0	1	1
5SrRNA:CR33436	0	0	0	0	0	0	0	0	0	0	0	-1.30545	0	1	1
5SrRNA:CR33437	0	0	0	0	0	0	0	0	0	0	0	-1.30545	0	1	1
5SrRNA:CR33438	0	0	0	0	0	0	0	0	0	0	0	-1.30545	0	1	1
5SrRNA:CR33439	0	0	0	0	0	0	0	0	0	0	0	-1.30545	0	1	1
5SrRNA:CR33440	0	0	0	0	0	0	0	0	0	0	0	-1.30545	0	1	1
5SrRNA:CR33441	0	0	0	0	0	0	0	0	0	0	0	-1.30545	0	1	1
5SrRNA:CR33442	0	0	0	0	0	0	0	0	0	0	0	-1.30545	0	1	1
5SrRNA:CR33443	0	0	0	0	0	0	0	0	0	0	0	-1.30545	0	1	1
5SrRNA:CR33444	0	0	0	0	0	0	0	0	0	0	0	-1.30545	0	1	1
5SrRNA:CR33445	0	0	0	0	0	0	0	0	0	0	0	-1.30545	0	1	1
5SrRNA:CR33446	0	0	0	0	0	0	0	0	0	0	0	-1.30545	0	1	1
5SrRNA:CR33447	0	0	0	0	0	0	0	0	0	0	0	-1.30545	0	1	1
5SrRNA:CR33448	0	0	0	0	0	0	0	0	0	0	0	-1.30545	0	1	1
5SrRNA:CR33449	0	0	0	0	0	0	0	0	0	0	0	-1.30545	0	1	1
5SrRNA:CR33450	0	0	0	0	0	0	0	0	0	0	0	-1.30545	0	1	1
5SrRNA:CR33451	0	0	0	0	0	0	0	0	0	0	0	-1.30545	0	1	1
5SrRNA:CR33452	0	0	0	0	0	0	0	0	0	0	0	-1.29802	0	1	1
5SrRNA-Psi:CR33356	0	0	0	0	0	0	0	0	0	0	0	-1.30545	0	1	1
5SrRNA-Psi:CR33363	0	0	0	0.29389	0.172021	0	0	0	0	0.307788	0.474404	-0.868537	0.0941134	0.75986	1
5SrRNA-Psi:CR33371	0	0	0	0	0	0	0	0	0	0	0	-1.30545	0	1	1
5SrRNA-Psi:CR33416	0	0	0	0	0	0	0	0	0	0	0	-1.30545	0	1	1
7B2	451.295	445.563	436.447	477.571	489.057	415.664	441.083	425.533	459.726	499.54	0.0373389	8.70109	0.220188	0.640068	1
7SLRNA:CR32864	0	0	0	0	0	0	0	0	0	0	0	-1.30545	0	1	1
7SLRNA:CR42652	0	0	0	0	0	0	0	0	0	0	0	-1.30545	0	1	1
825-Oak	0	0	0	0	0	0	0.200128	0	0	0	-1.45514	-1.27624	2.05082	0.200926	0.746845
a	36.9423	36.2342	24.1493	39.0873	33.8882	33.6385	35.2226	38.0388	37.7097	37.858	-0.107212	5.16355	1.19756	0.276824	0.807515
a10	0	0.147293	56.8565	0.29389	0.172021	0.169038	0.400257	1.04502	1.10911	0.615577	4.31448	4.14282	4.62901	0.0342013	0.36333
A16	13.7286	17.6752	7.15102	17.9273	16.342	13.692	14.2091	14.0033	17.4685	15.0816	-0.0450103	4.08445	0.0560843	0.813351	1
A2bp1	258.346	215.048	252.865	206.605	202.813	270.967	284.983	233.667	295.3	280.087	-0.264712	8.08675	3.94951	0.0500241	0.444568
a5	0	0	28.1352	0	0	0	0.200128	0	0.554554	0	5.32264	2.31086	6.2391	0.0144662	0.226782
a6	20.2184	22.3886	21.6875	18.2212	19.6104	21.1297	15.4099	17.1384	14.4184	19.0829	0.23028	4.12068	3.86489	0.052489	0.456332
Aac11	281.56	277.059	234.46	269.203	289.856	296.323	309.799	288.008	320.532	370.577	-0.229103	8.32881	11.4128	0.00109216	0.0405067
Aatf	10.9828	6.33362	4.80642	9.11058	11.0094	8.11381	5.80372	8.56918	8.04104	13.2349	-0.0627667	3.48866	0.086496	0.769379	1
Aats-ala	41.1857	40.5057	36.9274	38.4996	43.5214	75.8979	72.2464	84.4378	64.8829	75.1003	-0.894083	5.90138	87.0842	9.22772e-15	4.28756e-12
Aats-ala-m	26.7083	28.5749	21.6875	22.9234	25.9752	25.3556	22.0141	25.7076	23.014	23.3919	0.0734012	4.61228	0.538703	0.465671	0.984875
Aats-arg	21.9657	21.7994	21.2186	21.7478	25.1151	21.8059	22.6145	22.1545	17.4685	19.6984	0.102803	4.53628	0.824158	0.36647	0.908304
Aats-asn	63.6506	68.3442	42.7889	72.8847	69.6687	93.4778	90.2579	97.3961	95.9379	104.956	-0.607599	6.68002	27.6592	1.02066e-06	0.00011614
Aats-asp	62.9017	60.5376	48.8848	51.1368	52.8106	53.0778	48.8313	54.5502	50.1872	42.7826	0.14328	5.76218	1.96201	0.164848	0.73846
Aats-cys	20.468	19.1482	17.4672	18.5151	18.2343	31.7791	24.0154	31.5597	25.7868	28.0087	-0.59464	4.79195	30.6287	3.23816e-07	4.47643e-05
Aats-gln	29.454	32.4046	16.7639	32.6218	29.9317	26.7079	20.8134	28.8426	25.5095	32.01	0.0695321	4.91984	0.227143	0.634843	1
Aats-glupro	64.649	67.9023	61.8973	64.9497	72.077	137.259	131.084	134.39	128.934	125.27	-0.987061	6.55566	122.803	2.52724e-18	2.013e-15
Aats-gly	36.9423	37.4125	31.0659	42.0262	37.1566	33.3004	37.8243	33.8587	37.987	42.167	-0.0057463	5.2344	0.0026157	0.959328	1
Aats-his	52.9173	42.7151	36.5757	40.8507	42.6613	75.8979	77.4497	76.0776	82.9059	69.2524	-0.827638	6.20688	91.0661	3.41049e-15	1.72871e-12
Aats-ile	69.142	75.5616	98.473	74.648	71.5609	225.327	209.534	213.603	211.84	162.512	-1.3903	7.46732	284.606	3.40016e-29	9.47907e-26
Aats-leu	30.702	25.6291	31.1831	22.3356	24.427	28.7364	26.417	22.7815	28.8368	29.8555	-0.0173086	4.80907	0.0332115	0.87724	1
Aats-lys	111.326	118.719	83.5849	116.968	115.426	178.335	180.916	180.162	194.649	150.508	-0.698604	7.85531	33.7005	1.02083e-07	1.58106e-05
Aats-met	10.234	7.80655	12.778	9.11058	9.46118	8.28284	10.0064	10.2412	11.3684	8.00249	0.0538342	3.32866	0.108225	0.742963	1
Aats-phe	55.6631	61.716	60.725	56.4268	56.079	42.9356	55.6357	45.145	49.3553	50.7851	0.256371	5.58631	10.2007	0.00195422	0.062983
Aats-pro	7.73791	9.72137	7.50271	9.99225	7.91299	7.09958	8.80565	10.4502	11.9229	10.4648	-0.177363	3.24011	1.37897	0.243474	0.807515
Aats-ser	18.2215	12.6672	17.35	19.1028	14.2778	17.2418	18.4118	21.3185	21.6276	18.4673	-0.25823	4.14288	5.16863	0.0254555	0.313503
Aats-thr	95.1014	105.315	90.8531	107.858	108.718	122.214	132.285	130.001	138.084	129.579	-0.361098	7.0199	15.5149	0.000164509	0.00939158
Aats-trp	32.4493	25.3345	27.1973	34.9729	30.7918	32.6243	33.2213	32.3957	32.1642	32.3178	-0.119789	4.88986	1.28839	0.259456	0.807515
Aats-tyr	60.6553	62.1578	43.2578	55.8391	56.5951	41.4142	46.6299	47.862	54.3463	56.3253	0.177908	5.75944	3.03116	0.0852077	0.557399
Aats-tyr-m	11.4821	13.2564	8.67501	11.4617	14.9659	11.3255	12.6081	12.1223	11.0911	12.0037	0.0129285	3.8417	0.0073234	0.945133	1
Aats-val	51.6693	46.5447	38.9203	54.6635	50.2303	78.2644	76.4491	71.0615	79.024	68.0212	-0.630916	6.21767	38.3122	1.91334e-08	3.55606e-06
aay	198.44	180.729	146.068	196.612	156.023	125.257	127.082	165.532	131.152	144.045	0.339162	7.34883	4.92642	0.0290446	0.333718
ab	49.4228	44.188	43.844	48.4918	52.1225	62.3749	54.4349	61.2383	55.7327	60.0187	-0.306191	5.66372	10.7608	0.00149141	0.0515432
ABCB7	77.1295	81.1587	73.0342	79.938	90.6553	71.1648	63.841	73.1516	68.7648	81.2561	0.16768	6.25171	4.89603	0.0295314	0.337874
abd-A	0	0.147293	0	0	0	0.169038	0	0	0.277277	0	-0.924826	-0.907285	0.476368	0.493191	1
Abd-B	0	0	0	0	0.172021	0.169038	0	0	0	0	-0.176767	-0.982545	0.0190242	0.890799	1
Abi	49.1732	53.6148	57.7943	55.8391	50.7463	57.4728	58.4375	59.3573	67.9329	60.3265	-0.181314	5.77172	5.04764	0.0271856	0.323143
Abl	214.165	196.195	183.465	206.605	197.997	186.11	186.119	177.027	186.053	185.289	0.116255	7.48554	1.88568	0.173212	0.746845
abo	14.2278	9.57408	13.8331	10.58	10.8374	10.3113	10.0064	11.0772	12.4775	8.92586	0.161677	3.41129	1.15515	0.28544	0.811999
Abp1	41.4353	47.7231	46.0713	59.0719	43.5214	38.5406	48.4311	42.0099	38.5415	51.0929	0.119973	5.48132	1.29486	0.258271	0.807515
abs	26.4587	24.0088	20.1635	19.1028	23.911	21.8059	22.0141	21.7365	21.3503	22.4685	0.0555805	4.50635	0.263384	0.609103	1
ac	0	0	0	0	0	0	0	0	0	0	0	-1.28411	0	1	1
Ac13E	112.075	98.8339	123.326	95.2203	86.0107	119.51	103.066	117.043	110.911	84.0262	-0.0534542	6.94107	0.248732	0.619226	1
Ac3	288.05	260.415	347.938	236.875	247.367	323.707	328.611	303.057	316.928	301.325	-0.187788	8.03186	4.68893	0.033089	0.355706
Ac76E	128.549	120.928	159.433	120.201	120.931	131.68	122.679	121.223	122.279	110.188	0.0970267	6.85816	1.04545	0.309386	0.837579
Ac78C	42.4337	38.8855	46.1885	39.969	35.4364	41.4142	37.2239	37.6208	33.8278	37.2424	0.11377	5.22541	1.22305	0.271806	0.807515
Acam	0	0	0	0	0	0	0	0	0	0	0	-1.30545	0	1	1
ACC	400.874	473.696	350.048	447.3	485.789	410.423	356.229	612.174	344.656	382.889	0.0340376	8.90643	0.0452319	0.832075	1
AcCoAS	484.244	521.566	499.751	479.04	527.934	473.136	447.687	555.743	482.462	458.912	0.0554827	9.16212	0.307237	0.5808	1
Ace	494.228	440.407	572.668	417.03	414.572	523.848	565.163	503.701	544.295	451.833	-0.146209	8.88857	1.83598	0.178924	0.746845
Acer	31.9501	55.0878	32.121	45.259	50.2303	48.3448	38.6248	91.962	34.9369	45.2449	-0.27573	6.12843	1.24904	0.266807	0.807515
Acf1	54.6646	49.0487	40.5615	51.1368	49.1981	41.7523	45.229	48.28	56.5646	43.7059	0.0521202	5.60763	0.137873	0.711305	1
achi	13.2293	13.6983	13.3642	13.5189	14.7938	14.1992	15.4099	14.0033	17.7457	16.005	-0.166223	3.75878	1.41472	0.237504	0.800309
acj6	22.9641	23.8615	21.6875	21.7478	24.7711	29.2435	28.6184	25.0805	27.4504	22.7763	-0.214298	4.6953	3.28432	0.0733874	0.515995
Ack	103.588	106.051	97.3007	96.9836	102.869	158.557	162.504	146.721	170.803	155.433	-0.647177	7.19358	73.9136	2.95464e-13	1.17672e-10
Ack-like	99.5944	94.1205	88.743	87.8731	86.5268	86.3782	88.857	86.1099	100.929	96.6455	-0.00515458	6.48884	0.00416417	0.948696	1
Acn	213.167	249.81	140.207	267.734	263.021	217.044	225.545	231.368	232.636	308.404	-0.100086	8.02257	0.477411	0.491433	1
Acon	1595.01	1676.05	1702.65	1450.05	1498.48	1417.21	1446.33	1211.39	1404.13	1351.5	0.213997	10.3481	5.95151	0.0167307	0.244178
Acox57D-d	4.9922	5.74445	3.98581	7.05336	5.33267	5.57824	3.20205	9.1962	4.71371	3.69346	-0.0058992	3.01144	0.000534205	0.981613	1
Acox57D-p	16.2247	17.6752	14.302	15.8701	19.9545	16.2276	12.8082	21.5275	14.973	10.4648	0.132585	4.5567	0.575742	0.450033	0.974082
Acp1	19.9688	26.9547	58.146	28.2134	31.996	13.523	17.0109	39.2928	27.1732	4.00125	0.7191	5.03699	1.97378	0.163601	0.73583
Acp24A4	0	0	0	0	0	0	0	0	0	0	0	-1.0255	0	1	1
Acp26Aa	0	0	0	0	0	0	0	0	0	0	0	-1.29083	0	1	1
Acp26Ab	0	0.147293	0	0	0	0	0	0	0	0	1.24586	-1.23446	1.40911	0.280509	0.807515
Acp29AB	0	0	0	0	0	0	0	0	0	0	0	-1.30545	0	1	1
Acp32CD	0	0	0	0	0	0	0	0	0	0	0	-1.30545	0	1	1
Acp33A	0	0	0	0	0	0	0	0	0	0	0	-1.29789	0	1	1
Acp36DE	0	0	0	0.29389	0.172021	0	0.200128	0	0	0	0.509997	-0.929386	0.151416	0.69818	1
Acp53C14a	0	0	0	0	0	0	0	0	0	0	0	-1.19275	0	1	1
Acp53C14b	0.24961	0	0.468919	0	0	0.169038	0	0.418009	0.277277	0	-0.084925	-0.895409	0.00639744	0.936442	1
Acp53C14c	0.49922	0	0.11723	0	0	0	0.200128	0.418009	0	0	-0.235188	-0.966979	0.0530192	0.818456	1
Acp53Ea	0	0.147293	0	0	0	0.338075	0	0	0	0.307788	-1.38567	-0.984184	1.61046	0.209795	0.756735
Acp54A1	0	0	0	0	0	0	0	0	0	0	0	-1.18854	0	1	1
Acp62F	0	0.147293	0.11723	0	0	0	0	0	0	0	1.87523	-1.13416	2.0353	0.160269	0.729276
Acp63F	0	0	0	0	0	0	0	0	0	0	0	-1.10316	0	1	1
Acp65Aa	1.99688	2.50399	2.69629	2.9389	2.4083	1.52134	2.20141	2.29905	2.21822	0.615577	0.470381	2.47901	1.39129	0.241397	0.807515
Acp76A	0	0	0	0	0	0	0	0	0	0	0	-1.27716	0	1	1
Acp95EF	0	0	0.11723	0	0	0	0	0.209004	0	0	-0.239264	-1.14502	0.0299948	0.863311	1
Acp98AB	0	0	0	0	0	0	0	0	0	0	0	-1.29789	0	1	1
Acph-1	17.9719	14.7293	22.2737	17.9273	16.342	19.7774	18.2117	22.9905	17.4685	16.005	-0.0850902	4.23042	0.457201	0.500725	1
Acsl	241.623	280.152	260.485	239.814	266.805	335.709	283.782	365.34	277.555	294.553	-0.272414	8.5732	5.04272	0.0272586	0.323143
Act42A	53.4166	44.7772	44.6646	48.4918	39.2209	44.2879	48.231	37.6208	49.3553	40.9358	0.0607353	5.39883	0.184332	0.668736	1
Act57B	2773.92	2190.4	2883.38	1749.23	1873.31	2014.93	1974.27	1734.11	2296.69	2042.18	0.189134	10.9548	1.1096	0.29508	0.824008
Act5C	1122.25	1118.1	1065.62	1206.12	1226.51	907.056	982.03	941.565	980.73	869.194	0.293884	9.9438	19.054	3.48002e-05	0.00255308
Act79B	62.1529	812.029	43.6095	32.9157	140.197	36.5121	41.2265	31.1417	86.7878	317.637	1.12148	8.36959	1.64368	0.20322	0.750096
Act87E	243.37	412.422	218.751	177.509	223.456	189.491	188.121	154.872	221.267	263.159	0.331198	8.18575	1.53476	0.218725	0.76765
Act88F	7.98752	21.9467	6.33041	6.75947	12.5576	10.8184	3.20205	10.4502	11.9229	24.0075	-0.0504732	3.61698	0.00983668	0.921223	1
Actbeta	153.261	133.153	203.159	127.548	118.695	166.502	147.495	147.348	145.848	119.73	0.0182209	7.20421	0.0234798	0.87857	1
Actn	350.952	483.564	255.913	301.237	340.43	275.869	276.177	251.223	311.937	372.424	0.221067	8.30717	1.99259	0.16163	0.732083
Actn3	0	0	0.11723	0	0	0	0	0	0	0	1.21964	-1.25495	1.2804	0.280509	0.807515
ACXA	0	0	0	0	0	0	0	0	0.277277	0	-1.48456	-1.28427	2.30575	0.200926	0.746845
ACXB	0.49922	0.736467	0.937839	1.46945	0.172021	0.676151	1.00064	0	1.10911	1.23115	-0.0614593	-0.188097	0.00928064	0.923475	1
ACXC	4.74259	2.94587	5.04088	1.17556	4.47256	5.74728	6.20398	4.18009	6.37738	5.84798	-0.585005	1.58053	3.23833	0.0753938	0.522416
ACXD	1.99688	2.79858	1.64122	1.17556	2.23628	2.02845	3.20205	1.46303	1.94094	1.84673	-0.0722608	1.66969	0.0470522	0.828781	1
ACXE	0	0	0	0	0	0	0	0	0	0	0	-1.27726	0	1	1
Acyp	0	0	0	0	0	0	0	0	0	0	0	-1.30545	0	1	1
Acyp2	15.4758	20.1792	21.8047	16.1639	20.1265	17.0728	15.8101	17.9744	19.964	17.5439	0.102431	4.2141	0.576917	0.449572	0.974082
Ada	1.74727	1.32564	1.87568	1.76334	3.26841	2.19749	2.20141	1.88104	0.554554	1.23115	0.254815	1.22826	0.435834	0.510881	1
Ada1-1	0.24961	0.147293	0	0	0	0	0	0	0	0	1.93287	0.257103	3.20595	0.126964	0.655469
Ada1-2	4.24337	5.15527	4.45473	3.23279	4.8166	4.56402	4.00257	3.76208	2.4955	3.38567	0.262221	1.92399	0.9311	0.337247	0.872241
Ada2a	21.2169	22.5359	21.3358	26.1562	24.9431	20.6226	18.6119	21.9455	23.5686	23.0841	0.108385	4.3059	0.761044	0.385399	0.927029
Ada2b	29.2044	23.567	21.3358	22.0417	22.1908	20.6226	19.0122	22.5725	22.4595	22.4685	0.141784	4.62074	0.810782	0.37037	0.912263
Adam	62.9017	70.9955	39.272	83.1708	83.2584	69.6435	63.0405	74.6146	66.5465	82.795	-0.0756514	6.35124	0.378132	0.540206	1
AdamTS-A	39.4384	56.708	50.4088	39.0873	44.5536	46.1473	45.0289	44.727	47.6917	40.0125	0.0483277	5.25049	0.185831	0.667473	1
Adar	219.906	223.886	314.645	208.956	190.772	330.469	335.015	270.661	303.619	234.227	-0.347058	8.07901	5.11405	0.0262211	0.319438
adat	12.9797	9.27949	12.3091	10.58	12.7296	11.8326	12.0077	8.98719	10.8138	10.157	0.100465	3.48332	0.481375	0.489645	1
ade2	53.4166	52.8784	29.4247	76.1175	52.4665	36.8502	29.619	65.8364	27.4504	33.2411	0.430933	6.24837	2.51065	0.1167	0.653837
ade3	62.9017	70.259	39.0375	64.9497	90.3113	39.7238	30.4195	81.7208	32.7187	32.9333	0.579617	6.35801	3.3473	0.0707337	0.508887
ade5	71.3885	117.687	49.5882	106.388	122.823	43.4427	35.6229	169.921	32.7187	48.6305	0.493305	7.20821	1.30574	0.256297	0.807515
AdenoK	36.4431	44.188	31.3004	37.9118	39.2209	35.1598	34.8223	60.6113	33.5505	34.1645	-0.0735718	5.52498	0.236049	0.628293	1
Adf1	43.9314	39.6219	41.0304	43.2018	41.4572	54.5992	54.6351	38.2478	43.5325	44.3215	-0.175424	5.6231	5.58053	0.0203875	0.276803
Adgf-A	28.7052	37.2652	61.194	25.5684	30.2758	32.9623	25.8166	22.7815	28.005	18.4673	0.526424	5.16835	7.43974	0.00771396	0.161862
Adgf-B	0	0	0	0	0	0.169038	0	0	0	0	-1.43691	-1.27097	2.08853	0.200926	0.746845
Adgf-C	18.4711	28.7222	26.4939	22.0417	26.1473	27.5531	22.2143	23.4085	24.6777	28.0087	-0.0340016	4.22786	0.0771196	0.887713	1
Adgf-D	49.922	41.9786	28.7213	44.3774	57.1111	26.0318	22.4144	49.9521	29.6687	35.7034	0.436331	5.49283	5.01637	0.0276528	0.325968
Adgf-E	0	0	0	0	0	0	0	0	0	0	0	-1.26896	0	1	1
Adh	5.49142	5.89174	6.79933	4.11446	8.08501	5.4092	5.6036	6.47914	6.65465	2.46231	0.19814	2.74188	0.714599	0.400236	0.940295
Adhr	0	0	0	0	0	0	0	0	0	0	0	-1.30545	0	1	1
AdipoR	257.098	288.548	328.947	276.55	276.955	306.634	264.97	381.851	260.086	236.074	-0.0218185	8.40093	0.0212119	0.884539	1
Adk1	120.562	135.215	90.5014	104.331	114.566	97.5347	100.865	101.367	117.843	119.73	0.0749004	6.8587	0.513981	0.475337	0.992594
Adk2	57.9095	62.4524	62.8352	62.5985	65.7122	52.5707	56.8365	69.5985	57.9509	59.7109	0.0720106	5.98828	0.611743	0.436252	0.96613
Adk3	9.48518	13.8456	11.1368	14.1067	13.2457	7.94477	14.2091	12.9583	11.0911	13.8505	0.0508334	3.90132	0.138244	0.710936	1
AdoR	15.2262	12.9618	16.7639	13.8128	15.826	14.5372	13.4086	12.3313	15.8048	13.2349	0.110723	3.65462	0.775204	0.381033	0.923741
adp	35.9439	36.6761	30.597	28.8012	32.168	31.272	31.4202	29.2606	30.7778	36.319	0.0503544	4.9795	0.254686	0.615068	1
AdSL	20.9672	27.5439	21.3358	27.3318	26.4913	19.1013	18.6119	32.8137	16.3594	15.6972	0.256654	4.98217	0.867016	0.354354	0.893201
AdSS	194.446	156.131	133.408	150.765	146.046	132.356	121.478	122.268	132.539	155.741	0.232687	7.13285	7.16013	0.00890314	0.174383
Ady43A	47.1763	42.2732	33.5277	36.4423	34.0602	31.61	37.6241	39.9199	35.4915	39.7047	0.0686833	4.94961	0.379235	0.539617	1
Aef1	57.6599	64.9564	64.4764	62.3046	70.1848	82.4904	84.4542	78.7947	80.4104	71.7147	-0.31556	6.19739	17.9877	5.51821e-05	0.00383
aft	11.9813	11.6362	13.5987	10.2861	11.0094	13.692	10.8069	8.36018	11.3684	11.0804	0.0867144	3.6584	0.325311	0.569901	1
Afti	99.0952	92.6476	116.644	97.2775	82.0542	93.1397	97.6627	91.126	95.3834	95.7221	0.045351	6.49132	0.307222	0.580809	1
Ag5r	0.74883	1.47293	1.05507	474.632	19.9545	1.3523	0.800514	212.14	1.10911	0	1.13841	5.38462	0.970278	0.327337	0.858412
Ag5r2	0.49922	0	0.23446	0	0.172021	0.169038	0.200128	0	0.831832	0	-0.317564	-0.242649	0.115071	0.735298	1
AGBE	87.3635	107.966	77.02	76.4114	105.449	74.0385	69.2444	102.621	69.8739	88.9508	0.169203	6.55845	1.74142	0.190414	0.746845
ago	90.6085	85.7248	84.2882	90.5181	87.903	90.7732	81.2521	87.9909	86.2332	82.1795	0.0334756	6.43563	0.103464	0.748482	1
AGO1	412.855	405.941	483.925	380.293	326.153	423.777	421.27	406.305	401.497	382.581	-0.0185265	8.70067	0.0351039	0.851814	1
AGO2	317.504	269.547	260.485	250.982	263.193	262.515	243.356	274.632	256.481	264.082	0.0654888	8.02896	1.33478	0.251114	0.807515
AGO3	0	0.736467	0.586149	0	0.344043	0.507113	0.800514	0.418009	1.38639	0	-0.588169	1.72367	0.352834	0.554051	1
agt	5.74103	6.33362	6.91656	2.64501	6.19277	6.08535	6.20398	7.31516	6.65465	4.92461	-0.127709	3.02149	0.511457	0.625517	1
Ahcy13	25.7098	26.8074	11.8402	28.2134	35.9525	25.5247	15.61	28.8426	23.2913	19.0829	0.175177	5.14826	0.478437	0.490969	1
Ahcy89E	8.23713	14.5821	13.9503	11.4617	12.9016	13.8611	15.8101	14.4213	11.0911	15.3894	-0.189359	3.9297	1.44453	0.232663	0.790686
AIF	32.6989	36.3815	31.5348	32.9157	30.9639	34.9908	32.0205	36.5758	37.1551	37.2424	-0.11134	5.11289	1.05747	0.306637	0.83379
Ak6	2.4961	3.24046	5.27534	4.11446	3.78447	3.88787	6.00385	4.8071	4.71371	4.92461	-0.335909	2.27996	1.68794	0.197298	0.746845
Akap200	118.814	135.068	76.7855	147.533	131.252	110.551	114.273	141.914	127.548	127.732	-0.0324503	7.18903	0.0591115	0.808477	1
Akh	0	0.147293	0.11723	0.29389	0	0.169038	0.600385	0.418009	0.277277	0	-1.34622	-0.0962036	1.38322	0.242756	0.807515
AkhR	17.9719	32.5519	17.5845	19.3967	20.8146	31.441	11.4073	47.862	14.6957	26.7776	-0.28685	5.25501	1.14184	0.288215	0.814515
akirin	72.3869	72.0265	59.7872	71.1213	65.5402	74.3766	77.0494	73.7786	71.5375	73.8692	-0.123566	6.41533	1.37724	0.243768	0.807515
Akt1	84.1186	78.2128	83.1159	75.2358	71.0449	91.9565	82.4529	91.126	85.1241	85.2573	-0.154489	6.42941	3.18787	0.0776643	0.531108
al	0.49922	1.03105	0.703379	0.881669	0.688086	0.676151	0.200128	0.627013	0.277277	0.307788	0.781658	0.104309	1.58654	0.211183	0.757551
Alas	197.442	198.404	188.154	186.032	181.483	176.644	164.906	177.027	199.362	164.975	0.108144	7.52471	1.71929	0.193227	0.746845
alc	138.783	156.131	105.507	153.117	151.379	91.1113	90.458	111.399	102.038	117.575	0.46002	6.94057	15.7454	0.000148371	0.00892734
ald	3.74415	3.24046	3.39966	2.9389	4.30054	3.88787	4.40283	4.38909	5.26827	3.07788	-0.250346	2.20971	0.954658	0.33124	0.863838
Ald	1688.86	1729.08	1725.04	1448.88	1576.23	1645.58	1529.78	1392.81	1563.29	1456.76	0.106301	10.6658	1.1236	0.292074	0.818893
Aldh	586.833	734.111	594.355	615.111	679.485	499.168	473.904	559.714	502.981	503.849	0.338097	9.09651	9.43922	0.00283381	0.0831635
Aldh-III	129.548	149.503	144.193	128.724	151.379	143.513	139.89	142.541	143.352	136.35	-0.00336753	7.27405	0.00192806	0.965077	1
Alg10	8.23713	5.89174	9.96453	9.40447	7.39692	9.97322	8.00514	8.15118	5.82282	5.84798	0.0842266	3.09181	0.198833	0.734402	1
Alg-2	28.7052	34.7613	59.3183	24.3929	26.6633	49.8661	45.4292	41.8009	49.0781	35.0879	-0.329375	5.25046	3.23211	0.0756698	0.523419
Alh	150.016	146.852	135.869	125.491	155.851	134.892	140.89	137.316	141.411	142.814	0.0353115	6.99064	0.159195	0.690875	1
alien	50.9205	55.6769	45.3679	55.2513	53.8427	54.092	54.2348	53.2961	51.2963	53.2474	-0.0305681	5.71128	0.110613	0.740246	1
ALiX	192.699	162.465	128.132	163.109	166.345	118.326	117.475	128.329	133.093	140.967	0.348348	7.20162	19.1301	3.3682e-05	0.00248194
Alk	281.81	227.716	288.151	215.127	211.586	289.9	287.184	249.76	265.909	227.763	-0.109284	7.92558	0.998145	0.320525	0.850105
AlkB	3.74415	3.09316	4.92365	2.64501	3.44043	4.90209	7.60488	6.27013	5.54554	4.92461	-0.685214	2.43405	8.47292	0.00457518	0.114908
alph	102.839	112.974	88.743	116.968	109.578	118.326	119.877	112.026	103.424	119.73	-0.112726	6.87359	1.7731	0.186471	0.746845
alpha4GT1	27.4571	23.1251	35.4034	25.5684	31.6519	31.272	27.2175	30.9327	34.9369	29.2399	-0.0930757	4.83614	0.634012	0.450501	0.974455
alpha4GT2	0.24961	0	0.11723	0	0	0	0	0	0	0	1.91791	-1.23499	3.10622	0.126964	0.655469
alpha-Cat	154.259	170.419	223.792	141.361	157.228	208.592	208.934	185.178	204.353	193.599	-0.237541	7.629	6.55215	0.0121992	0.207089
alpha-catenin-related	108.081	113.563	99.0592	110.503	120.587	103.62	108.269	110.772	108.97	114.805	0.0144005	6.6393	0.0363649	0.849207	1
alphaCOP	112.325	109.439	100.466	129.312	117.147	97.3657	99.0636	109.1	100.929	98.8	0.168238	6.68801	5.00641	0.0278034	0.327066
alpha-Est1	43.4322	64.3672	70.8068	46.4346	60.2075	43.4427	43.4279	51.6241	52.96	36.9346	0.329458	5.76452	6.88993	0.0102351	0.190436
alpha-Est10	8.73635	15.7604	20.1635	14.1067	15.1379	19.6084	14.4092	14.4213	13.5866	14.7738	-0.0403266	4.06219	0.0556088	0.950102	1
alpha-Est2	5.49142	24.1561	7.61994	8.22891	15.3099	11.6636	5.6036	25.4985	6.1001	9.54144	0.0741094	4.11055	0.0420634	0.837977	1
alpha-Est3	21.7161	21.063	17.7017	27.3318	18.5783	19.4393	15.2098	17.5564	18.3003	16.9284	0.268489	3.90687	2.9435	0.0897761	0.574992
alpha-Est4	1.74727	3.09316	3.28243	2.05723	2.4083	3.21172	2.20141	1.25403	1.38639	2.46231	0.275387	1.25973	0.763752	0.384558	0.926473
alpha-Est5	3.74415	3.97692	4.45473	4.40835	3.26841	2.53556	2.60167	6.27013	3.32733	3.38567	0.134987	2.35062	0.175367	0.676415	1
alpha-Est6	0	0.294587	0	0.29389	0.172021	0	0	0	0	0	2.74029	-1.20678	5.17904	0.0309004	0.342527
alpha-Est7	118.814	161.286	132.352	132.25	137.101	104.127	87.6563	159.052	92.8879	100.647	0.32468	6.97623	4.1549	0.0445445	0.418124
alpha-Est8	62.9017	83.5154	114.182	76.7052	82.9143	81.4761	82.0527	84.0198	69.042	54.7863	0.179657	6.04423	2.66487	0.106193	0.622378
alpha-Est9	97.8472	102.369	107.617	83.4647	85.8387	115.284	114.073	105.547	106.474	116.652	-0.223351	6.67177	5.83305	0.0178168	0.253851
alphagamma-element:CR32865	0	0	0	0.29389	0	0	0	0	0.277277	0	-0.182603	-0.860855	0.0264075	0.871345	1
alphaKap4	0	0	0	0	0	0	0	0	0	0	0	-1.30545	0	1	1
alpha-Man-I	168.487	160.55	208.083	158.994	155.163	178.842	185.919	177.863	169.416	167.745	-0.0467094	7.51135	0.283932	0.595491	1
alpha-Man-Ib	90.6085	110.912	133.29	97.8653	104.417	118.664	119.877	109.309	122.557	112.651	-0.114654	6.69664	2.4716	0.119542	0.655469
alpha-Man-II	51.4197	50.9635	52.05	54.6635	44.7256	50.3732	55.4356	53.0871	51.019	42.7826	0.00210114	5.58535	0.000659129	0.979576	1
alpha-Man-IIb	173.978	164.232	188.857	156.055	160.324	169.714	175.713	147.557	164.425	140.044	0.080795	7.24135	1.07695	0.302252	0.830111
alphaSnap	434.322	426.267	387.679	449.358	430.742	449.978	455.692	411.321	476.64	430.288	-0.0636856	8.8774	0.868954	0.35382	0.892317
alpha-Spec	806.989	789.64	511.708	734.725	741.412	668.206	668.429	651.467	713.989	698.987	0.0754713	9.43372	0.460744	0.499075	1
alphaTry	0	0	0.11723	0.29389	0.172021	0	0	0	0	0	2.36872	3.80672	0.181926	0.671011	1
alphaTub67C	1.99688	2.50399	2.3446	2.64501	2.75234	2.19749	2.8018	1.46303	5.82282	2.77009	-0.242558	2.91972	0.201227	0.654846	1
alphaTub84B	1113.51	1308.7	1172.3	1281.65	1300.65	1069.84	1191.56	1057.98	1092.47	1136.66	0.154795	9.96489	5.18166	0.0252763	0.312159
alphaTub84D	182.715	185.148	184.754	188.383	200.405	134.216	149.296	152.364	155.553	140.659	0.363075	7.14797	18.7249	4.00976e-05	0.00289726
alphaTub85E	3.99376	6.33362	5.74426	2.64501	3.78447	4.0569	4.80308	1.67204	5.26827	7.38692	0.018998	1.55942	0.00154486	0.968737	1
Alr	16.9735	17.6752	14.4193	18.8089	17.7182	15.0443	18.0116	16.3024	14.1411	17.2361	0.0772959	4.03777	0.289356	0.594997	1
alrm	59.9064	43.5989	72.0963	40.8507	72.249	42.0904	42.2271	37.2028	50.1872	43.3981	0.433948	5.76075	6.63425	0.011688	0.202178
alt	109.08	107.23	54.7463	98.4531	112.674	89.2519	92.2592	115.579	98.988	116.652	-0.0907253	6.7302	0.417313	0.519978	1
aly	0	0	0	0	0.172021	0	0	0	0	0	1.26137	-1.19464	1.24978	0.280509	0.807515
Ama	0.74883	0.44188	0.468919	1.17556	0.172021	0	0.600385	0.627013	0.277277	0.307788	0.583174	0.549713	0.563179	0.455003	0.977234
amd	5.49142	6.48091	8.55778	3.82057	3.61245	6.59247	5.00321	6.27013	8.87287	7.69471	-0.238262	3.00778	1.10317	0.372292	0.914628
amn	0	0	0	0	0	0.338075	0	0	0.554554	0	-3.00114	-0.866817	6.33694	0.0137438	0.220075
Amnionless	5.99064	5.15527	4.3375	3.23279	5.50469	5.91632	6.60424	4.38909	5.26827	9.23365	-0.350046	2.53841	3.02212	0.0856665	0.558887
amon	381.903	334.062	396.94	355.901	332.517	384.054	395.654	351.755	374.324	369.961	-0.0584755	8.41766	0.729445	0.395404	0.937347
amos	0	0	0	0	0	0	0	0	0	0	0	-1.26955	0	1	1
AMPdeam	340.967	330.527	315.231	336.504	328.733	293.618	297.791	318.732	293.359	302.556	0.133128	8.27517	6.85288	0.0104333	0.192432
Amph	250.858	246.864	266.112	228.646	279.191	253.725	239.554	213.812	256.759	206.218	0.120386	7.90393	2.42946	0.122697	0.655469
AMPKalpha	251.357	250.546	264.939	235.112	252.872	211.973	222.543	217.574	202.69	207.142	0.240958	7.73229	14.845	0.000222478	0.0118139
Amun	117.816	122.695	84.7572	112.854	124.888	105.649	104.267	115.161	118.12	124.654	-0.0123614	6.95354	0.0126738	0.910624	1
amx	9.9844	11.4889	8.90947	13.8128	12.7296	10.9874	9.80629	10.2412	9.98198	10.7726	0.12357	3.53417	0.656683	0.473685	0.991904
Amy-d	10.4836	8.10114	2.22737	5.29002	4.8166	0.676151	0.600385	10.2412	0.554554	0.307788	1.19423	4.18998	1.22307	0.271802	0.807515
Amy-p	12.4805	0.294587	0.11723	0	0.344043	0	0	2.71706	0	0	1.85172	4.05434	0.734595	0.393748	0.935641
Amyrel	0	0	0	0	0	0	0	0.209004	0	0	-1.45954	-1.10889	2.03387	0.200926	0.746845
ana	27.9563	16.9387	19.1085	19.9845	25.1151	16.2276	21.814	22.3635	24.1231	20.6218	0.0506419	4.602	0.165255	0.698346	1
ana1	22.2153	23.2724	14.771	19.9845	21.5027	14.1992	15.8101	17.1384	15.8048	16.9284	0.346366	4.4177	5.5875	0.0203115	0.276471
ana2	1.49766	3.24046	1.05507	3.23279	1.54819	1.52134	1.4009	2.50805	1.94094	2.46231	0.089582	1.6057	0.0429457	0.836311	1
ana3	2.99532	3.24046	3.98581	2.9389	2.4083	4.22594	4.40283	2.92606	4.43644	3.07788	-0.277821	2.39249	0.674559	0.413707	0.954889
Ance	27.7067	34.0248	31.0659	32.6218	34.9204	26.5389	24.2155	23.1995	29.6687	25.5464	0.315904	4.75568	6.90495	0.0101558	0.189383
Ance-2	0	0	0	0.29389	0	0	0	0.209004	0	0	-0.158268	-0.986552	0.0218156	0.883117	1
Ance-3	26.4587	28.5749	43.7267	24.099	24.427	35.1598	31.22	22.3635	26.8959	34.1645	-0.00924247	5.00663	0.00421868	0.948361	1
Ance-4	9.73479	22.9778	8.67501	34.679	23.3949	11.3255	4.80308	40.3379	6.65465	9.84922	0.397363	4.81059	0.737443	0.392836	0.934173
Ance-5	25.7098	31.5208	19.1085	20.8662	29.7597	24.0033	20.0128	33.6497	24.4004	12.6193	0.137542	4.95008	0.420266	0.518508	1
Andorra	0.24961	0.147293	0.11723	0	0.172021	0.507113	0.200128	0	0	0	-0.230011	-0.947028	0.0642066	0.800658	1
angel	10.4836	8.83761	6.6821	9.99225	11.6975	7.77573	8.20527	6.47914	7.20921	10.157	0.253076	3.31618	2.12104	0.14888	0.70114
Ank	616.287	603.314	962.574	548.986	510.56	801.915	764.491	754.088	740.053	639.892	-0.19036	9.40695	2.53369	0.11506	0.649984
Ank2	1604.74	1716.85	1161.63	1665.77	1606.34	1189.35	1406.3	1283.29	1490.92	1453.99	0.184579	10.5443	2.80677	0.0974505	0.598405
Anp	0	0	0	0	0	0	0	0	0	0	0	-1.16203	0	1	1
Ant2	7.4883	4.71339	4.68919	3.52668	3.61245	4.90209	3.40218	2.92606	2.77277	4.61682	0.352876	2.25148	2.28919	0.133895	0.671945
antdh	1.49766	4.27151	19.8118	3.23279	4.12851	3.21172	3.80244	2.29905	5.54554	1.84673	1.11973	4.10634	2.53018	0.115307	0.650004
Antp	2.24649	3.24046	4.45473	0.58778	1.72021	1.69038	2.00128	1.46303	1.66366	1.53894	0.631331	1.83749	2.46421	0.120089	0.655469
antr	0	0.147293	0.11723	0.29389	0	0.169038	0	0.209004	0	0	0.217758	-0.352539	0.0509517	0.851557	1
AnxB10	154.758	184.411	122.036	169.574	180.795	113.424	151.897	130.628	125.329	157.588	0.258024	7.11947	4.93335	0.0289348	0.333268
AnxB11	63.9002	53.7621	65.4142	55.8391	51.9505	73.7004	71.2457	68.3445	62.3874	59.0953	-0.205476	5.98859	5.72701	0.018852	0.262782
AnxB9	269.829	274.26	273.263	275.669	278.847	259.473	257.565	251.641	229.586	254.233	0.131064	7.88553	3.5682	0.0622207	0.491623
aop	70.39	56.2661	63.5386	49.0796	55.907	61.3607	62.8403	52.0421	55.4554	54.1707	0.0457343	5.8666	0.234438	0.629467	1
aos	21.4665	28.2803	28.7213	21.454	26.3193	34.4837	29.4189	22.1545	28.5596	24.3153	-0.132041	4.62307	1.66227	0.200707	0.746845
Aos1	15.2262	15.9077	15.826	17.6334	18.7503	14.5372	15.8101	14.0033	16.0821	19.3907	0.0694117	4.076	0.180909	0.671642	1
ap	86.1155	69.6698	82.1781	64.6558	67.4324	80.1238	67.8435	107.01	77.6376	66.1745	-0.109095	6.32417	0.905996	0.343811	0.881638
AP-1-2beta	161.747	170.713	134.463	166.636	174.946	142.161	142.692	148.602	151.393	141.275	0.154271	7.1575	4.08939	0.0462189	0.426187
AP-1gamma	142.278	139.487	145.131	132.838	140.542	152.472	156.5	151.737	141.411	152.047	-0.106703	7.18281	2.21745	0.140068	0.684862
AP-1mu	64.8986	70.8482	61.3112	78.4686	79.1299	63.8962	61.4394	57.6852	65.7147	71.7147	0.146385	5.97381	3.25058	0.0748535	0.520742
AP-1sigma	79.8752	83.3681	131.18	85.5219	90.8273	128.469	115.874	112.444	107.029	84.334	-0.21774	6.64705	3.48111	0.0654363	0.505801
AP-2alpha	236.88	238.763	266.229	218.948	234.809	251.866	266.971	251.223	262.582	229.302	-0.0773371	7.9051	1.65057	0.202285	0.748872
AP-2mu	122.559	102.074	119.926	119.319	104.761	105.141	111.472	106.801	121.17	114.497	0.0243707	6.75881	0.120876	0.728924	1
AP-2sigma	64.1498	67.9023	73.2686	65.5374	70.3568	59.5012	69.6447	62.9104	67.9329	59.4031	0.0972675	5.85736	1.20644	0.275062	0.807515
Apc	245.367	229.336	211.248	233.642	218.467	212.142	223.143	217.156	227.922	213.913	0.0560113	7.69237	0.364064	0.547824	1
APC10	7.98752	7.07009	8.55778	7.93503	6.88086	8.95899	7.80501	9.4052	7.76376	6.77134	-0.0932975	3.01766	0.311082	0.578446	1
Apc2	2.24649	3.24046	2.22737	2.64501	2.75234	1.85941	2.00128	1.46303	3.32733	0.615577	0.493142	1.89929	1.39439	0.240877	0.806835
APC4	7.98752	7.36467	10.3162	9.69836	9.80522	9.12803	12.6081	11.4952	10.5365	11.0804	-0.275115	3.47742	2.69707	0.104135	0.615937
APC7	0.49922	0.44188	0.703379	0.29389	0.688086	0.676151	0.200128	0.209004	1.94094	0.615577	-0.291381	1.33568	0.125007	0.72452	1
ApepP	14.2278	8.83761	15.3571	14.1067	13.2457	12.6778	14.4092	15.0483	13.8639	12.9271	-0.0734457	3.92877	0.199626	0.656131	1
Apf	13.4789	15.7604	14.1848	13.225	17.2021	12.1707	11.8076	12.1223	12.2002	11.0804	0.318183	3.66228	4.38156	0.0392351	0.390647
aph-1	9.73479	11.9308	16.0605	14.1067	12.7296	11.8326	10.2065	13.1673	13.5866	8.31028	0.179933	3.69076	1.52739	0.219824	0.769086
Aph-4	74.1342	80.1276	69.5173	84.0525	86.5268	70.8268	81.6524	73.7786	87.3423	60.6343	0.0734962	5.88498	0.428942	0.514233	1
aPKC	234.384	191.776	243.017	191.91	187.331	214.34	229.948	207.123	211.84	204.987	-0.0268683	7.76923	0.0868689	0.768897	1
Aplip1	200.187	188.978	190.498	201.315	196.621	178.504	198.728	179.326	204.353	200.678	0.0240312	7.53481	0.159733	0.69038	1
Apoltp	244.618	172.923	92.2599	161.346	188.363	149.936	99.4638	344.23	108.693	152.047	0.00339147	7.65255	0.000142106	0.990516	1
app	339.719	335.093	401.395	302.707	295.705	341.287	321.406	275.05	278.664	265.313	0.176466	8.19102	3.37742	0.069502	0.508074
APP-BP1	31.9501	29.9006	27.9007	34.0912	33.0281	34.6527	33.2213	29.0516	31.055	34.1645	-0.0528388	4.86748	0.293781	0.589191	1
Appl	1001.44	992.611	858.122	1002.75	971.749	978.39	1043.27	948.671	1024.54	1070.8	-0.0697897	9.98094	0.51915	0.473132	0.991587
Aprt	5.99064	10.4578	10.5507	10.2861	9.46118	8.45188	9.40604	9.4052	4.43644	10.157	0.165373	3.34876	0.874792	0.352216	0.890899
Aps	113.573	124.316	101.404	120.495	112.33	153.993	158.101	140.869	145.016	135.119	-0.359493	7.233	18.8708	3.76541e-05	0.0027504
apt	19.7192	21.7994	14.5365	20.2784	23.739	18.087	22.4144	19.2284	18.8549	21.5452	-0.00379206	4.44823	0.000736697	0.978408	1
AQP	43.9314	55.2351	56.0359	32.9157	45.0696	38.2025	33.2213	34.0677	42.978	43.0904	0.298812	5.15248	2.39342	0.12547	0.655469
aqrs	0	0.147293	0	0	0	0	0	0	0	0	1.2458	-1.27722	1.83248	0.280509	0.807515
ara	7.73791	6.62821	5.27534	8.5228	6.88086	8.28284	8.00514	6.47914	8.59559	6.77134	-0.150688	3.05996	0.641233	0.425442	0.962458
aralar1	142.028	122.106	109.375	107.564	127.812	127.285	111.872	160.724	117.566	112.035	-0.0497277	7.45101	0.197963	0.657473	1
Arc1	319.002	225.506	255.795	237.169	201.781	211.466	209.534	173.265	164.148	275.163	0.261943	7.63497	2.92965	0.0905221	0.577044
Arc2	15.7254	6.03903	4.45473	5.58391	7.74097	5.91632	3.80244	4.38909	4.43644	4.61682	0.726242	2.67511	9.09138	0.00336376	0.0931549
Arc42	14.2278	22.6832	20.6324	17.6334	23.5669	19.1013	19.2123	20.2734	17.1912	20.314	0.0521745	4.52978	0.116883	0.733263	1
aret	65.1482	59.8012	68.345	57.6024	58.3153	72.5171	64.0411	54.7592	67.3784	56.633	-0.0285846	6.1867	0.0535991	0.817457	1
Arf102F	72.6365	62.3051	114.651	74.9419	77.4097	85.533	85.4548	79.6307	66.5465	77.8704	0.0274106	6.379	0.0446773	0.833092	1
Arf51F	76.1311	81.306	94.8389	78.1747	83.4304	98.887	93.46	85.9008	92.8879	82.795	-0.131803	6.51724	1.6601	0.200998	0.746845
Arf79F	220.156	239.794	205.738	247.749	244.959	242.4	220.542	256.658	231.804	225.301	-0.02341	7.93139	0.0951624	0.75845	1
ArfGAP1	40.9361	56.2661	30.9487	49.0796	52.4665	41.2452	40.2258	49.7431	45.1962	46.1682	0.0444695	5.60212	0.140399	0.708795	1
ArfGAP3	48.9236	45.5137	37.8652	49.3735	57.7992	39.8929	42.8275	51.4151	48.2462	42.167	0.0899095	5.65245	0.822436	0.366969	0.908414
Arfip	36.6927	32.6992	28.6041	34.0912	32.6841	33.1314	35.823	35.7398	37.987	33.2411	-0.0991951	5.17456	1.40936	0.238387	0.802152
Arfrp1	9.48518	8.83761	13.3642	12.9312	11.8695	13.354	9.60616	13.7943	11.9229	8.61807	-0.0304392	3.69199	0.0406442	0.840696	1
arg	2.4961	3.38775	2.3446	3.82057	4.47256	1.69038	1.80116	5.43412	2.4955	3.07788	0.188284	1.98033	0.207192	0.650109	1
Argk	3145.84	3398.5	3161.1	3051.75	3244.32	2780.67	2673.72	2395.19	2815.2	2703	0.259486	11.2158	6.61287	0.011819	0.203391
ari-1	137.286	147.735	135.869	133.72	140.197	139.625	139.69	133.972	145.016	145.892	-0.0183964	7.13816	0.0754206	0.836186	1
ari-2	57.4103	56.5607	56.8565	53.7818	61.5837	54.092	55.2354	57.4762	53.5145	53.2474	0.0654891	5.7276	0.701857	0.404451	0.943425
Ark	91.8565	82.6316	110.079	79.0564	81.0221	97.0276	105.067	89.4539	93.7197	95.4144	-0.11006	6.31363	1.5908	0.210576	0.757486
Arl1	18.2215	21.9467	20.7497	17.0456	22.3628	19.7774	20.6132	25.0805	19.964	20.314	-0.0678997	4.3596	0.349018	0.625433	1
Arl2	11.4821	12.6672	11.4885	12.0495	13.9337	13.1849	12.8082	11.0772	13.032	13.2349	-0.0363584	3.56968	0.0580914	0.810104	1
Arl4	71.3885	77.0345	118.05	61.1291	69.8407	127.961	130.684	109.1	120.338	112.035	-0.586768	6.69425	16.2111	0.000120545	0.00752369
Arl6	1.49766	1.91482	0.703379	1.46945	0.344043	0.676151	0.200128	0	0.554554	0.307788	1.6442	0.782274	8.16972	0.00532704	0.125324
arm	596.319	546.753	650.625	582.784	569.735	502.718	549.152	535.47	546.513	501.079	0.161157	9.01024	8.11531	0.00547504	0.127426
armi	9.73479	7.95385	9.0267	8.5228	10.8374	7.77573	8.40539	8.98719	9.98198	8.61807	0.079669	3.43322	0.110515	0.740357	1
Arp1	97.3479	101.927	95.894	95.8081	107.857	81.9833	89.2573	82.7658	81.5195	100.647	0.195733	6.47141	8.42608	0.00468372	0.116584
Arp10	29.2044	31.8154	26.2595	29.389	31.824	21.4678	25.8166	27.1706	21.3503	26.7776	0.277136	4.72694	5.13275	0.0259561	0.317606
Arp2	79.8752	70.1117	71.5102	77.293	68.4645	78.9406	77.2496	71.6885	70.7057	76.0237	-0.0315519	6.16738	0.19182	0.662489	1
Arp3	42.4337	39.6219	40.6787	35.8546	39.737	41.2452	43.0276	41.5919	38.5415	41.8592	-0.0556827	5.28579	0.465146	0.497037	1
Arp5	15.4758	16.4969	8.08886	19.6906	18.0623	12.0017	14.8095	16.5114	14.973	17.8517	0.0179893	4.0509	0.0110575	0.916495	1
Arp53D	0	0	0	0	0	0	0	0	0.277277	0	-1.48424	-1.19604	2.04679	0.200926	0.746845
Arp6	15.975	15.1712	16.4122	19.1028	20.4706	18.4251	17.0109	16.7204	13.5866	22.1608	-0.0143856	4.17904	0.0125915	0.910913	1
Arp8	8.23713	7.36467	8.08886	6.46558	5.50469	7.43766	6.80437	7.94217	8.87287	6.15577	-0.0579312	3.01342	0.105032	0.761325	1
Arpc1	107.083	107.082	74.5582	104.625	118.351	96.6895	92.0591	97.3961	90.9469	110.804	0.0675251	6.56573	0.38972	0.534077	1
Arpc2	32.4493	42.7151	37.6308	40.2629	36.4685	42.9356	48.8313	42.0099	38.8188	42.167	-0.18062	5.46517	1.70054	0.195651	0.746845
Arpc3A	18.2215	14.5821	17.1156	15.2823	21.3307	15.8895	16.4105	16.0933	16.0821	15.0816	0.12097	4.00816	1.01081	0.317492	0.846729
Arpc3B	1.74727	1.47293	2.11014	0.58778	0.860107	1.3523	1.00064	0.836018	1.38639	1.84673	0.156639	0.919506	0.141772	0.707441	1
Arpc4	27.9563	29.606	23.5632	34.679	33.0281	24.3414	30.4195	21.7365	24.4004	28.0087	0.201617	4.74355	2.25524	0.136777	0.677373
Arpc5	18.7208	20.7684	13.1297	22.0417	17.3742	15.2134	16.4105	18.8104	17.4685	19.6984	0.0641769	4.16825	0.211039	0.727652	1
arr	60.4056	55.5296	65.7659	49.6674	53.4987	54.4301	52.6338	60.8203	55.4554	49.8617	0.0623519	5.78432	0.494163	0.483949	0.997907
Arr1	6343.84	6944	6060.31	7086.27	7394.17	8421.45	8486.85	7537.96	7708.58	8546.66	-0.266847	12.5268	8.95866	0.00359219	0.0970504
Arr2	10021.1	10793.2	8557.31	11544	10982.4	9851.18	9261.34	9021.26	8712.05	10211.5	0.141242	13.0717	2.43226	0.122484	0.655469
Ars2	124.056	136.099	116.409	132.544	141.746	126.44	131.885	136.689	127.548	159.434	-0.0664313	7.07035	0.745684	0.390216	0.931491
Art1	19.7192	17.086	14.6537	21.7478	17.7182	19.2703	17.8114	18.8104	23.5686	21.2374	-0.15618	4.50151	1.01108	0.317426	0.846729
Art2	2.24649	1.17835	1.28953	1.46945	1.20415	2.87364	1.00064	1.46303	1.66366	0.615577	-0.12366	0.830367	0.135567	0.713621	1
Art3	7.98752	7.07009	6.33041	10.2861	8.60107	9.97322	7.40475	10.8682	11.0911	15.0816	-0.440117	3.50627	5.56972	0.0205058	0.277959
Art4	22.9641	19.1482	26.6112	17.3395	24.9431	24.6795	21.814	25.0805	24.955	27.0854	-0.142363	4.58906	1.18599	0.279142	0.807515
Art6	0	0	0	0	0	0	0	0	0	0	0	-1.30545	0	1	1
Art7	10.4836	8.83761	6.09595	11.4617	11.0094	9.29707	8.60552	8.15118	8.31832	8.92586	0.116794	3.53121	0.450676	0.708276	1
Art8	1.24805	2.94587	3.86858	1.76334	2.75234	2.02845	2.40154	2.92606	2.21822	3.07788	0.0748142	1.92242	0.0725716	0.788265	1
Art9	0	0	0	0	0	0	0	0	0	0	0	-1.30545	0	1	1
aru	49.922	67.4604	36.4585	72.2969	64.8521	54.5992	51.0327	44.309	45.1962	61.8654	0.174682	5.76068	1.96933	0.164071	0.736227
arx	2.99532	3.68234	3.86858	1.46945	3.44043	3.21172	3.20205	2.71706	3.88188	4.00125	-0.0699008	2.207	0.0707186	0.995436	1
ARY	0	0	0	0	0	0	0	0	0	0	0	-1.30545	0	1	1
Asap	152.262	148.325	136.807	141.949	143.294	141.654	158.902	147.557	146.957	160.665	-0.0644631	7.20559	0.875694	0.351969	0.890706
Asator	595.07	563.25	794.115	534.292	502.991	766.079	755.085	702.673	702.343	628.196	-0.249262	9.23876	6.825	0.0105852	0.192432
Asciz	8.98596	8.69031	7.8544	9.11058	7.91299	5.74728	8.80565	8.98719	9.42743	8.00249	0.0564622	3.11856	0.0894257	0.76562	1
ase	0	0	0	0	0	0	0	0.209004	0	0	-1.45953	-1.14381	1.53332	0.221741	0.772239
asf1	12.4805	12.5199	12.5436	17.0456	16.6861	12.8469	16.2104	12.9583	15.5275	18.1595	-0.0864856	3.97402	0.311091	0.578441	1
ash1	89.61	86.0194	67.8761	79.0564	80.506	77.7573	69.0443	72.7336	80.1331	84.6418	0.0687007	6.21808	0.609123	0.437232	0.966791
ash2	30.9517	33.8775	32.4727	32.9157	34.4043	28.7364	24.8159	28.6336	26.6186	31.0866	0.237792	5.04346	7.03808	0.00948083	0.180097
asl	4.24337	2.79858	1.52399	3.23279	3.09639	2.36653	2.8018	2.50805	3.05005	3.07788	0.0721796	2.14875	0.0373752	0.847153	1
asp	0.49922	0.736467	0.23446	0.58778	0.516064	0.507113	0.400257	1.04502	3.05005	1.53894	-1.23403	1.92596	1.8688	0.175128	0.746845
asparagine-synthetase	70.39	73.6467	76.4338	73.7663	74.4853	95.3372	88.2566	98.2321	93.4424	84.334	-0.317896	6.30438	12.5359	0.000643287	0.0262445
Asph	130.546	157.604	117.464	121.67	125.92	123.567	124.08	103.875	127.27	161.897	0.0309773	7.07952	0.0714754	0.789832	1
ASPP	64.649	74.2359	50.8777	64.6558	82.5703	67.7841	66.2425	62.2833	68.7648	77.5626	-0.0224751	6.11922	0.04191	0.838269	1
asrij	22.7145	20.9157	21.6875	20.8662	25.6312	21.1297	23.415	22.5725	22.7367	22.4685	-0.00476944	4.47681	0.0015214	0.976891	1
ast	9.9844	8.83761	7.03379	9.11058	8.08501	7.77573	9.60616	8.36018	7.20921	9.23365	0.0154037	3.27704	0.00909091	0.924259	1
AstA	53.9158	51.2581	68.4622	51.4307	54.3588	53.2469	62.0398	49.5341	55.4554	58.172	0.0100555	5.89274	0.01057	0.91835	1
AstA-R1	10.7332	12.2254	17.4672	9.11058	11.3534	15.0443	13.0083	12.7493	11.9229	12.6193	-0.0800808	3.91524	0.178659	0.673569	1
AstA-R2	1.49766	0.883761	2.93075	0.29389	1.72021	1.52134	0.200128	1.46303	1.66366	1.23115	0.363467	0.916377	0.625163	0.431281	0.962458
AstC	132.543	121.517	147.944	107.564	117.835	124.412	140.69	116.416	119.784	144.968	-0.0400751	6.88144	0.178181	0.67398	1
AstCC	0.74883	1.32564	0.820609	0.881669	1.37617	0.676151	0.600385	0.627013	0.277277	0.615577	0.845139	0.365133	2.58301	0.111632	0.639517
AstC-R1	90.3589	72.3211	102.342	79.938	86.5268	84.5188	89.6575	86.1099	93.4424	84.6418	-0.0211922	5.60065	0.0369849	0.943423	1
AstC-R2	17.4727	15.3185	20.0463	17.3395	14.1058	21.1297	18.2117	15.8843	14.4184	16.005	-0.0312981	4.10071	0.0486554	0.825936	1
asun	10.234	8.69031	8.08886	8.5228	9.46118	9.97322	11.4073	9.61421	9.7047	9.84922	-0.175707	3.42913	1.77938	0.185701	0.746845
Asx	90.3589	77.771	70.6896	73.4725	75.3454	89.928	84.2541	82.9748	82.3513	95.4144	-0.167035	6.38856	3.24448	0.0751218	0.521612
Atac1	6.24025	6.62821	3.86858	5.58391	5.50469	4.73305	4.40283	7.10615	5.82282	6.46355	-0.0371411	2.59425	0.0416443	0.838775	1
Atac2	12.9797	9.1322	12.8953	11.7556	13.0736	9.12803	11.0071	13.3763	10.5365	8.00249	0.191738	3.47627	2.10799	0.150121	0.703716
Atac3	12.9797	15.1712	13.0125	12.9312	16.17	13.692	14.6094	15.2573	11.3684	22.1608	-0.118266	3.95047	0.784987	0.392182	0.93368
ATbp	7.73791	7.80655	6.56487	9.99225	6.70884	9.63515	7.60488	6.27013	4.15916	8.92586	0.0524887	3.09212	0.0830426	0.968164	1
Ate1	58.6584	62.3051	64.0075	68.4763	68.4645	69.4745	54.6351	57.4762	62.3874	62.7888	0.0690348	5.8801	0.579556	0.448541	0.973708
Atet	142.028	129.618	156.502	128.724	129.188	148.922	153.699	138.57	156.662	117.575	-0.0605772	7.07133	0.65595	0.420199	0.960672
Atf-2	13.7286	13.551	11.8402	16.1639	14.4498	12.0017	14.009	20.0644	15.2502	13.8505	-0.117774	3.85457	0.66753	0.416141	0.957567
Atf3	67.6443	71.29	86.9845	56.4268	62.0997	96.3515	93.46	80.8847	76.2512	74.4848	-0.288093	6.17719	8.02232	0.00573794	0.131839
Atf6	63.6506	67.3131	115.471	51.7246	57.9712	147.232	130.684	110.772	119.784	92.6443	-0.746782	6.76548	15.5801	0.000159769	0.00926126
Atg1	146.272	145.379	130.125	125.785	131.252	130.835	151.297	138.988	145.293	122.808	-0.0222335	7.17093	0.12945	0.719873	1
Atg10	0.99844	1.62023	2.46183	2.9389	1.03213	2.53556	1.60103	2.71706	2.77277	3.07788	-0.472337	1.76524	2.01564	0.159252	0.725636
Atg101	81.1233	70.4063	69.0484	71.7091	69.6687	74.7146	73.0469	81.0937	80.965	89.8742	-0.142555	6.32034	4.32504	0.0404925	0.397254
Atg12	16.2247	17.5279	20.1635	18.8089	15.826	15.7205	18.6119	14.2123	15.8048	12.3115	0.203329	3.91794	2.45948	0.120441	0.655469
Atg13	24.961	31.6681	37.3963	32.6218	27.6955	33.4695	35.4227	38.0388	35.2142	31.3944	-0.164796	5.16599	2.30383	0.132674	0.669929
Atg14	32.1997	36.0869	24.501	33.2095	33.0281	36.3431	39.2252	35.9488	44.0871	49.2461	-0.363137	5.30432	12.2472	0.000736416	0.029469
Atg16	17.9719	20.9157	16.7639	20.5723	18.9224	17.918	19.6126	17.1384	17.4685	20.314	0.0401893	4.42293	0.146578	0.733828	1
Atg17	125.055	121.959	106.796	119.613	121.103	113.931	111.872	123.313	110.634	112.035	0.0549424	6.9428	0.552566	0.45927	0.980405
Atg18a	87.1139	86.314	101.755	75.8236	84.6346	88.4067	77.6498	89.2449	81.2422	74.177	0.0863946	6.4414	1.50535	0.223153	0.775059
Atg18b	73.8846	62.0106	66.5865	68.7702	58.4873	63.2201	58.6376	57.6852	62.1101	60.3265	0.124448	5.92619	1.87644	0.174258	0.746845
Atg2	99.844	104.726	90.8531	96.3959	91.8595	85.195	91.2586	90.917	89.5605	88.9508	0.117167	6.53181	2.34353	0.129425	0.662452
Atg3	32.1997	34.7613	27.6662	36.7362	34.9204	27.7222	32.2207	36.7848	32.996	36.9346	-0.00373885	5.16952	0.00094059	0.975604	1
Atg4a	50.6708	54.6459	42.4372	55.5452	56.251	47.3305	44.8288	62.4923	46.028	54.7863	0.0207106	5.82993	0.0328603	0.994207	1
Atg4b	43.6818	44.188	54.6291	45.8468	43.0054	43.2736	44.4285	38.0388	43.5325	38.4735	0.15678	5.39688	3.63964	0.0597112	0.489255
Atg5	17.7223	17.9698	24.501	15.5762	18.7503	22.651	19.2123	23.1995	21.6276	20.0062	-0.162756	4.23398	2.1504	0.183361	0.746845
Atg6	27.9563	30.9316	30.3625	33.2095	32.34	23.4962	28.4182	28.8426	24.4004	33.2411	0.165575	4.79268	2.55156	0.113804	0.646383
Atg7	14.2278	18.1171	22.2737	12.0495	18.2343	16.2276	13.4086	14.0033	15.5275	17.2361	0.179431	4.12857	1.6589	0.201161	0.746999
Atg8a	520.437	497.263	619.442	470.224	491.637	551.232	551.754	504.328	523.777	454.295	0.00772454	9.03773	0.00739548	0.931666	1
Atg8b	0	0	0.351689	0	0	0.169038	0	0.209004	0.277277	0	-0.363278	-0.928699	0.10433	0.747591	1
Atg9	49.6724	53.9094	46.423	43.2018	40.7691	37.8644	36.0231	43.0549	47.4144	44.3215	0.170879	5.47401	2.76536	0.0999165	0.603707
atilla	122.559	146.262	161.777	140.185	152.755	110.72	119.477	108.264	93.7197	119.114	0.393611	6.80831	15.911	0.000137789	0.00841165
atk	0.74883	0.147293	0.468919	1.46945	2.06426	0.507113	0.400257	0.418009	0	0.307788	1.31712	1.81729	1.26256	0.264252	0.807515
atl	126.053	136.983	118.637	116.38	109.062	138.104	119.277	121.641	135.311	130.194	-0.085699	6.94355	1.2836	0.260337	0.807515
atms	40.6864	39.9165	32.121	44.0835	38.7048	31.441	39.8256	36.3668	39.9279	50.1695	-0.0149319	5.28974	0.0192122	0.89008	1
ato	0.74883	0.736467	0.468919	0.58778	0.688086	0.338075	0.400257	0.836018	1.66366	0.923365	-0.29762	-0.194208	0.288383	0.598508	1
Atox1	60.9049	69.9644	56.7392	69.9458	67.9485	65.2485	61.0392	69.3895	69.3193	75.4081	-0.0638852	6.13471	0.516736	0.47416	0.992333
ATP7	49.6724	43.4516	43.7267	36.4423	44.5536	43.4427	47.0302	45.354	42.4234	38.1657	0.00847745	5.43623	0.00802347	0.967465	1
Atpalpha	5554.57	5291.52	6313.18	5143.66	5451.02	5419.35	5717.07	5015.69	5552.48	4844.28	0.0640572	12.1995	0.709867	0.401794	0.94063
ATPCL	359.189	370.149	395.885	374.122	375.867	366.305	348.223	402.334	339.942	342.261	0.0597082	8.3503	0.824609	0.36634	0.908304
ATPsyn-b	590.078	690.217	544.298	558.978	599.839	485.983	498.72	501.611	535.145	527.241	0.227535	9.00558	4.2656	0.0418613	0.402969
ATPsyn-beta	2894.73	3115.55	3902.82	2660.88	2741.68	2786.75	2824.21	2590.4	2812.15	2518.94	0.178683	11.3167	2.91138	0.091517	0.579192
ATPsyn-Cf6	288.799	384.436	270.097	342.676	362.277	257.951	284.182	269.616	275.614	309.635	0.239108	8.10439	4.52182	0.0362917	0.3738
ATPsyn-d	367.426	455.726	303.977	393.225	440.203	294.802	335.615	313.925	361.015	357.65	0.237956	8.43465	3.36986	0.0698088	0.508074
ATPsyn-gamma	542.652	642.641	510.536	582.196	600.355	446.09	486.512	476.321	495.772	487.229	0.267232	8.91584	5.86009	0.0175625	0.251084
AttA	62.6521	1.91482	3.51689	6.75947	1.89224	4.22594	2.40154	12.5403	2.77277	4.92461	1.37897	4.78178	1.35387	0.247778	0.807515
AttB	10.4836	1.03105	3.75135	4.70224	1.72021	2.53556	2.20141	1.04502	1.38639	3.69346	0.888006	4.39467	0.459214	0.499786	1
AttC	132.044	4.27151	0.351689	14.4006	3.26841	0.676151	0.800514	10.8682	0.554554	0.923365	3.32642	6.12878	4.40476	0.0387311	0.388636
AttD	86.3651	0.44188	1.40676	0	0	0	0	0	11.3684	0	3.04235	1.06325	10.4996	0.00169123	0.0570347
att-ORFA	10.7332	16.9387	13.9503	12.0495	14.4498	15.2134	15.8101	13.3763	11.3684	11.3882	0.0228949	3.80582	0.0254351	0.873657	1
att-ORFB	0	0	0	0	0	0	0	0	0	0	0	-1.30545	0	1	1
Atu	12.4805	20.9157	9.37839	17.0456	14.2778	13.354	16.0103	12.7493	14.973	18.4673	-0.0255048	4.09064	0.0134265	0.90802	1
Atx-1	0.24961	0	0.11723	0.58778	0.172021	0.338075	0.200128	0.418009	0.277277	0	-0.435925	-0.653065	0.258611	0.61236	1
Atx2	206.178	181.613	153.688	199.551	176.838	189.829	189.321	189.149	186.053	173.593	-0.0180692	7.46295	0.04835	0.826474	1
Atxn7	30.9517	36.2342	28.7213	34.3851	33.2001	29.9197	36.2232	25.7076	33.8278	33.8567	0.0365395	4.9602	0.100501	0.751987	1
aub	2.74571	3.38775	3.75135	3.23279	3.09639	4.0569	4.00257	4.18009	4.15916	3.07788	-0.25706	2.02395	0.372654	0.54315	1
aur	1.49766	1.47293	1.28953	1.17556	1.37617	1.52134	1.4009	0.627013	0.554554	0.307788	0.516475	1.65133	1.02085	0.315113	0.844593
aust	0	0	0	0	0	0	0	0	0	0	0	-1.2841	0	1	1
aux	126.303	118.571	147.827	119.613	108.029	118.833	115.474	115.161	116.456	91.4131	0.153891	6.7132	4.41623	0.0384846	0.387323
ave	8.73635	11.1943	11.0196	7.05336	10.1493	9.97322	10.2065	8.15118	9.15015	8.61807	0.0803212	3.37612	0.271181	0.603861	1
Aven	6.48986	9.27949	6.56487	8.22891	8.08501	6.76151	6.40411	6.68814	6.93193	6.15577	0.228229	2.89853	2.29945	0.144384	0.693004
awd	261.591	309.905	282.172	328.863	347.999	270.291	259.166	296.577	252.045	264.698	0.188486	8.05745	2.35856	0.128219	0.658953
Awh	6.48986	5.15527	7.15102	7.34725	7.05288	5.91632	4.60295	6.06113	8.31832	5.2324	0.141746	2.63882	0.493135	0.484403	0.998473
Axn	85.3667	85.8721	80.7713	84.3464	82.3983	84.6879	81.4523	88.6179	86.2332	85.8729	-0.027895	6.35691	0.188407	0.665318	1
axo	96.8487	73.794	85.695	76.4114	100.977	86.2092	81.6524	72.9426	82.9059	78.486	0.10848	6.47757	1.05505	0.307188	0.834281
Axs	40.4368	40.0638	47.0092	37.0301	35.4364	34.6527	39.8256	35.5308	41.5916	36.0112	0.0973681	5.12823	0.785522	0.377896	0.919696
Axud1	42.6833	39.3274	38.2169	37.0301	36.8126	39.5548	33.8217	42.8459	45.4735	39.3969	-0.0499107	5.5303	0.342462	0.559923	1
az2	10.4836	9.27949	7.15102	9.69836	11.8695	12.5088	10.0064	10.8682	8.87287	11.696	-0.170034	3.5311	1.32544	0.252766	0.807515
b	23.2137	34.9086	23.6804	25.5684	32.6841	23.3272	24.4157	21.1095	26.3413	31.3944	0.160338	5.05224	0.90321	0.34455	0.882316
B4	190.453	177.047	201.753	158.701	152.583	225.496	217.94	192.702	191.044	183.134	-0.198462	7.49599	4.39607	0.0389192	0.389588
B52	623.776	540.125	691.304	567.795	600.871	647.921	639.811	632.03	630.251	687.291	-0.0981221	9.13884	2.72562	0.102348	0.610176
b6	3.74415	3.53504	3.51689	3.23279	5.67671	2.02845	1.4009	1.67204	2.77277	2.15452	0.993194	1.48118	10.14	0.00201264	0.0642471
bab1	14.2278	12.2254	17.5845	12.0495	10.3213	12.0017	15.4099	14.2123	10.5365	14.7738	-0.00255263	3.74809	0.000260384	0.987162	1
bab2	44.181	41.5368	38.4514	43.4957	38.7048	51.2184	51.433	43.8909	46.028	43.3981	-0.199448	5.59599	4.02471	0.0479384	0.435559
babo	154.009	144.348	185.926	145.475	124.888	173.095	172.511	164.487	159.157	136.658	-0.0950494	7.33847	1.02253	0.314719	0.844314
babos	26.9579	36.2342	33.0588	32.3279	38.5328	32.7933	23.415	43.6819	20.5185	30.1632	0.149157	5.25649	0.597886	0.441478	0.969439
Bacc	405.117	405.352	405.967	366.187	397.37	544.639	547.952	481.964	510.745	505.388	-0.387682	9.05547	20.2543	2.08517e-05	0.00165301
Bace	0.24961	0.44188	0.468919	0.58778	0.688086	0	0.200128	0.627013	0.277277	0	1.05956	2.47841	0.33116	0.566459	1
baf	22.7145	27.6912	21.2186	26.1562	29.0716	19.6084	23.8153	24.6625	21.6276	32.01	0.0676162	4.7054	0.277317	0.599803	1
bai	66.3963	70.259	57.7943	72.003	71.905	71.1648	60.839	64.7914	62.1101	67.7134	0.0483261	6.16706	0.377652	0.676709	1
Baldspot	162.995	151.712	181.237	143.124	152.755	212.987	195.726	177.236	177.18	186.52	-0.261686	7.46264	7.1977	0.0087328	0.172868
ball	4.49298	6.92279	4.57196	5.29002	6.88086	3.71883	6.20398	4.8071	4.43644	4.92461	0.235456	2.8849	0.6496	0.422449	0.962458
bam	0	0	0	0	0.172021	0	0	0	0.554554	0	-0.94673	-0.288454	0.445002	0.506875	1
ban	0	0	0	0	0	0	0	0	0	0	0	-1.30545	0	1	1
bap	1.49766	1.03105	0.937839	1.76334	1.37617	1.69038	1.00064	1.04502	0.554554	1.53894	0.117497	0.41652	0.0774954	0.925293	1
Bap170	47.6755	39.1801	36.8102	37.9118	38.8768	39.3858	38.4247	40.3379	41.3143	40.3203	0.00269305	5.34873	0.000497101	0.982263	1
Bap55	19.7192	20.3265	20.8669	15.5762	19.6104	16.3967	19.0122	18.8104	16.0821	17.2361	0.141468	4.25141	1.15194	0.286105	0.812965
Bap60	38.9392	40.0638	35.9896	38.7935	43.3494	34.1456	35.4227	36.7848	33.2733	37.5502	0.1542	5.28485	1.93477	0.167778	0.743031
barc	55.4134	59.212	45.9541	64.068	74.4853	56.1205	61.8397	69.1805	68.7648	73.8692	-0.140174	6.01279	1.25541	0.265598	0.807515
barr	4.9922	7.36467	4.92365	4.70224	7.39692	5.74728	6.40411	6.68814	8.04104	8.00249	-0.213843	3.08627	0.929846	0.33757	0.872726
baz	60.156	65.9875	66.3521	61.423	62.4438	72.8552	63.841	59.1483	62.3874	60.3265	-0.0101595	6.09482	0.00969455	0.921792	1
bbc	200.936	187.799	217.11	199.257	214.167	211.466	210.935	206.496	210.176	203.14	-0.0319453	7.60362	0.496451	0.482942	0.997883
bbg	44.6802	61.2741	51.8156	53.4879	50.7463	44.4569	43.8281	44.727	40.2052	39.7047	0.298774	5.4857	7.27246	0.0084039	0.169978
BBS1	0.49922	0.147293	0.937839	0.881669	0.860107	0.169038	0.400257	0.418009	1.38639	0.923365	0.11455	-0.0614709	0.0368119	0.848295	1
BBS4	2.24649	1.91482	3.16521	2.05723	1.54819	1.52134	2.40154	1.25403	3.05005	3.69346	-0.0482927	1.74943	0.0207748	0.886396	1
BBS8	0.99844	1.62023	1.05507	0.881669	0.860107	1.69038	1.20077	0.836018	0.554554	0.307788	0.171728	0.889953	0.145043	0.728298	1
bbx	0.74883	1.32564	1.87568	1.46945	0.860107	2.02845	1.60103	0.418009	0.554554	0.615577	0.217688	0.714966	0.204442	0.652282	1
bc10	42.9329	48.9014	51.9328	45.8468	44.0375	52.4017	47.0302	49.3251	48.8008	46.7838	-0.0625513	5.60007	0.442101	0.507865	1
BCAS2	6.48986	9.72137	5.62703	7.64114	8.94512	8.45188	7.60488	7.73317	5.82282	8.31028	0.0141489	3.09326	0.0044705	0.966303	1
bcd	0	0.294587	0.11723	0.29389	0.172021	0	0	0	0	0	2.98834	0.552632	2.62636	0.11042	0.635886
bchs	269.829	247.895	257.554	214.833	197.481	243.245	253.763	219.246	240.677	196.984	0.0411005	7.68494	0.169413	0.681645	1
BCL7-like	9.48518	10.1632	9.0267	7.93503	8.94512	11.3255	12.0077	11.9133	10.8138	8.61807	-0.265378	3.44372	2.73511	0.101761	0.608566
bcn92	18.7208	21.7994	14.8882	15.5762	21.3307	13.1849	19.4125	19.8554	17.7457	20.6218	0.0345414	4.39773	0.0424665	0.837214	1
Bdbt	10.4836	17.6752	16.6466	15.5762	19.2664	13.8611	11.4073	13.5853	9.7047	13.5427	0.366122	3.87451	5.97046	0.0165635	0.243246
bdg	41.4353	38.0017	34.4656	38.2057	34.5763	30.9339	33.2213	33.2317	27.7277	42.167	0.158765	5.03605	3.00363	0.0866143	0.563734
be	31.7005	38.8855	43.6095	30.8584	34.9204	37.8644	33.8217	31.1417	31.6096	34.1645	0.101412	4.95624	1.17266	0.281843	0.808226
BEAF-32	25.2106	30.7843	21.4531	27.3318	29.9317	26.877	22.0141	28.2156	24.4004	26.4698	0.0721309	4.84448	0.436174	0.510716	1
beag	20.468	30.1952	15.7088	32.3279	27.3514	18.2561	22.2143	21.9455	22.7367	26.4698	0.173072	4.588	1.24231	0.26809	0.807515
beat-Ia	32.4493	29.4587	31.1831	38.7935	34.7483	30.2577	31.6203	29.8876	34.9369	30.7788	0.0772035	4.98329	0.640402	0.425741	0.962458
beat-Ib	70.39	76.0034	70.1034	67.0069	76.0335	81.1381	75.6485	79.0037	82.6286	83.4106	-0.158233	5.98237	3.13068	0.0803289	0.540491
beat-Ic	33.6974	33.141	45.6024	31.1523	28.7276	37.1883	44.6286	42.0099	47.4144	33.5489	-0.241691	5.45845	3.46925	0.0658879	0.506543
beat-IIa	126.053	102.811	135.4	97.8653	114.05	115.115	132.885	121.641	131.707	107.726	-0.0787181	6.81697	0.973243	0.326603	0.857224
beat-IIb	38.6896	42.8624	38.9203	36.7362	38.5328	39.3858	39.4253	42.4279	42.1461	46.1682	-0.0931908	5.39418	1.08699	0.300022	0.828443
beat-IIIa	0	0	0	0	0	0	0	0	0	0	0	-1.30545	0	1	1
beat-IIIb	64.1498	57.5917	60.4906	60.8352	55.907	68.2912	64.8416	58.5213	59.6146	63.4044	-0.0762627	6.035	0.653968	0.420899	0.961256
beat-IIIc	26.2091	27.2493	37.9825	29.0951	26.1473	38.7096	41.8268	28.2156	33.2733	34.7801	-0.264858	5.17535	3.625	0.0602165	0.489255
beat-IV	63.1514	59.0647	65.0625	63.4802	62.2718	63.2201	71.8461	67.5085	59.8919	72.3302	-0.0968425	5.96346	1.49097	0.225359	0.778377
beat-Va	42.4337	58.4755	96.2457	49.9613	44.3815	66.7699	89.6575	57.2672	61.2783	38.4735	-0.0993151	5.36573	0.217382	0.642205	1
beat-Vb	35.4446	34.9086	41.0304	26.1562	34.4043	33.1314	32.6209	31.9777	38.8188	37.858	-0.0070982	5.03845	0.00424172	0.948221	1
beat-Vc	24.961	27.102	24.0321	28.8012	27.1794	25.5247	25.2162	23.6175	29.1141	25.8542	0.0298005	4.52598	0.0917183	0.764707	1
beat-VI	52.1685	52.7311	53.574	52.6063	49.8862	55.9515	61.8397	50.5791	60.1692	55.7097	-0.122734	5.81618	1.65546	0.201624	0.747632
beat-VII	123.807	114.742	145.248	113.148	106.137	137.428	147.094	142.541	130.875	134.503	-0.198378	6.98033	3.761	0.0556953	0.469564
beg	12.9797	11.1943	8.79224	9.99225	12.7296	9.29707	9.80629	9.1962	11.0911	14.1583	0.0665751	3.45298	0.210755	0.647319	1
bel	179.47	163.201	158.26	169.868	177.87	183.575	179.915	197.509	181.339	181.903	-0.123831	7.42624	3.60748	0.0608272	0.489255
Bem46	17.9719	17.9698	27.0801	17.6334	19.0944	18.9322	22.4144	19.6464	24.1231	14.7738	0.00802857	4.35199	0.00362893	0.952102	1
ben	161.248	152.596	189.795	157.231	145.53	178.335	160.103	133.763	176.903	151.432	0.0111618	7.50506	0.0139606	0.906217	1
Best1	80.8737	70.9955	90.3842	79.0564	68.8086	92.2945	88.2566	78.1677	77.9149	86.1807	-0.116706	6.24789	2.40943	0.124229	0.655469
Best2	61.6537	72.4684	87.219	75.2358	68.9806	76.7431	72.6466	67.9265	66.2693	58.7876	0.0940924	6.0499	0.971984	0.326914	0.857906
Best3	0.24961	0.147293	0.11723	0	0	0.169038	0.200128	0	0.554554	0.307788	-0.962828	-0.900544	1.15498	0.297132	0.825191
Best4	0	0	0	0	0	0	0.400257	0	0.277277	0	-2.65511	-1.08695	4.63103	0.0354895	0.368945
Bet1	14.2278	13.4037	14.302	14.1067	16.17	16.0586	16.6107	14.4213	18.3003	15.3894	-0.159531	4.04185	1.43165	0.234739	0.794833
Bet3	22.9641	26.5128	22.1564	28.5073	28.0395	27.046	25.4163	24.0355	26.3413	32.9333	-0.0814371	4.65212	0.505557	0.478967	0.99413
Bet5	13.7286	15.7604	17.9362	21.7478	18.4063	17.4109	19.8127	17.1384	16.0821	17.5439	-0.0132043	4.09454	0.0127555	0.910338	1
beta3GalTII	8.23713	7.51197	9.14393	8.5228	8.08501	9.97322	7.40475	7.94217	9.42743	8.00249	-0.0442404	3.0068	0.0798906	0.778116	1
beta4GalNAcTA	26.9579	26.2182	35.8723	32.034	22.8789	32.1172	33.6216	31.1417	34.6597	31.3944	-0.176967	4.84703	1.91962	0.169433	0.746406
beta4GalNAcTB	14.4774	15.3185	13.5987	17.0456	17.8902	12.8469	14.4092	13.7943	13.3093	17.5439	0.126071	3.85381	0.970165	0.327365	0.858412
beta4GalT7	2.74571	6.33362	6.33041	6.46558	9.11714	7.26862	7.20462	6.27013	8.04104	6.15577	-0.153634	2.80728	0.56485	0.454337	0.9765
betaCOP	103.339	107.672	82.5298	123.14	120.587	88.9138	92.2592	107.637	105.643	93.2598	0.137298	6.88592	1.32292	0.253214	0.807515
beta'COP	63.6506	70.8482	61.7801	71.1213	73.4532	58.6561	61.8397	68.1355	58.5055	63.7122	0.132336	6.02063	2.83649	0.0957228	0.593021
betaggt-I	24.961	20.1792	28.3696	14.9884	21.5027	23.3272	19.4125	19.6464	18.5776	21.853	0.108168	4.45584	0.700668	0.404848	0.943978
betaggt-II	38.6896	40.8003	40.4443	37.324	44.2095	35.3289	33.0212	38.6658	29.3914	35.0879	0.232827	5.11844	4.13204	0.0451212	0.420939
betaNACtes1	0	0	0	0	0.172021	0	0	0	0	0	1.26145	-1.28433	1.60322	0.280509	0.807515
betaNACtes2	0	0	0	0.29389	0	0	0	0	0	0	1.30349	-1.27608	1.48489	0.280509	0.807515
betaNACtes3	0.24961	0	0	0	0	0	0	0	0	0	1.2922	-1.23441	1.59856	0.280509	0.807515
betaNACtes4	0	0	0	0	0	0.169038	0	0	0	0	-1.43721	-1.20276	1.88676	0.200926	0.746845
betaNACtes6	0	0	0	0	0	0	0	0	0	0	0	-1.24289	0	1	1
beta-Spec	846.428	961.679	575.129	922.226	925.475	668.544	729.468	693.686	750.589	840.878	0.19998	9.46634	2.29835	0.133129	0.670738
betaTry	0	0	0	0	0	0.169038	0	0	0	0	-1.45842	3.85975	0.077421	0.781678	1
betaTub56D	583.588	688.302	591.424	647.145	681.893	477.7	508.526	488.443	532.65	545.709	0.322728	8.82155	12.004	0.000825641	0.0320429
betaTub60D	11.4821	10.6051	15.5916	14.9884	11.8695	15.2134	13.8089	15.8843	11.6456	8.92586	-0.0389782	3.9412	0.0319626	0.858525	1
betaTub85D	1.49766	1.62023	1.1723	1.76334	1.37617	0.338075	1.60103	1.46303	1.66366	0.923365	0.308638	0.635646	0.461271	0.49883	1
betaTub97EF	132.793	148.914	130.711	144.006	152.583	88.0686	86.6556	87.5729	86.2332	74.177	0.744356	6.86197	73.1048	3.68995e-13	1.3716e-10
bft	0	0	0	0	0	0	0	0	0	0	0	-1.30545	0	1	1
BG642163	0	0	0	0	0	0	0	0	0	0	0	-1.2267	0	1	1
BG642167	0	0	0	0	0	0	0	0	0	0	0	-1.27612	0	1	1
BG642312	0	0	0	0	0	0.169038	0.400257	0.209004	0	0	-2.97065	-1.02147	6.01001	0.0165472	0.243246
Bgb	40.9361	42.5678	40.0926	38.2057	46.2738	38.5406	41.6267	43.8909	39.3734	48.9383	-0.0246343	5.29782	0.0583721	0.931511	1
bgcn	0.24961	0.294587	0.468919	0	0.516064	0.676151	0.400257	0.209004	0.554554	0.307788	-0.357444	-0.497191	0.202878	0.653526	1
bgm	29.7036	77.4764	28.9558	59.0719	45.4137	41.5833	20.8134	156.335	40.2052	39.3969	-0.31721	6.37912	0.864857	0.354951	0.893897
B-H1	6.24025	5.30257	8.08886	7.05336	6.02075	7.60669	9.80629	6.27013	5.82282	6.15577	-0.136206	2.92583	0.480636	0.489977	1
B-H2	3.24493	4.86068	3.16521	4.99613	2.75234	2.7046	5.40347	2.92606	3.6046	1.53894	0.192337	2.35437	0.479957	0.490283	1
BHD	9.9844	12.9618	7.8544	9.99225	8.25703	8.95899	8.40539	9.82321	10.2593	12.0037	-0.00304594	3.3402	0.000373686	0.984621	1
bi	39.1888	29.4587	42.4372	29.0951	28.5556	39.5548	40.8262	31.5597	35.7688	32.3178	-0.0930569	5.11025	0.809642	0.370705	0.912609
BI-1	167.239	156.131	243.135	158.994	163.076	182.392	185.319	176.609	185.776	147.738	0.0189248	7.31523	0.0381172	0.845662	1
bib	19.4696	14.8766	14.0676	15.2823	15.1379	12.3397	15.2098	14.0033	14.1411	12.6193	0.197953	3.64004	1.76938	0.186929	0.746845
bic	274.321	305.339	263.064	318.577	332.689	264.882	255.564	314.343	266.186	248.693	0.145929	8.25718	3.12435	0.0806298	0.540776
BicC	0	0	0	0	0	0	0	0	0	0	0	-1.30545	0	1	1
BicD	118.814	116.362	110.782	117.262	120.759	130.835	142.091	122.686	142.798	131.426	-0.198061	7.00318	5.93727	0.0168575	0.244911
bif	426.334	421.554	369.743	428.491	378.963	376.785	389.25	369.102	363.788	379.811	0.107739	8.64232	1.4406	0.233294	0.791864
BigH1	0	0.589174	0.23446	0.881669	0	0.338075	0	0.209004	1.66366	0	-0.327429	2.04073	0.064449	0.800256	1
bigmax	23.713	23.7142	11.1368	25.5684	20.8146	12.1707	15.61	20.0644	14.4184	19.0829	0.355013	4.43549	4.57738	0.0351918	0.368138
Bili	109.329	97.2137	124.264	100.804	92.2035	99.7322	107.069	98.4411	105.365	104.34	0.0260849	6.60801	0.091071	0.763539	1
bin	0.74883	0.44188	0.23446	0.29389	0.516064	0.169038	0.200128	0	0.277277	0.307788	1.16328	-0.794691	1.73666	0.191564	0.746845
Bin1	18.2215	7.65926	6.33041	8.81669	11.1814	6.25439	9.60616	7.31516	8.04104	8.00249	0.386008	3.2448	3.38909	0.0690308	0.508074
bin3	107.832	97.361	110.665	88.1669	94.4398	108.691	108.069	109.518	108.693	87.1041	-0.0669033	6.65091	0.733335	0.394152	0.935972
bip1	10.4836	11.7835	7.50271	6.17169	9.80522	8.62092	10.8069	11.4952	9.7047	11.3882	-0.169909	3.41816	0.949306	0.332592	0.865538
bip2	245.866	244.507	335.981	202.196	198.169	316.946	328.01	304.52	288.923	279.164	-0.30547	8.04774	8.23456	0.0051561	0.124094
Bka	6.24025	8.39573	4.10304	4.40835	7.74097	9.29707	12.408	8.98719	9.15015	8.61807	-0.643828	3.01989	13.6425	0.000385093	0.018094
bl	135.788	142.433	112.423	143.418	148.971	120.017	127.882	123.104	127.27	136.658	0.104991	7.15134	2.20945	0.140775	0.686715
blanks	0	0.294587	0.11723	0.29389	0	0	0.200128	0.209004	0.831832	0.307788	-0.886573	-0.916321	0.965628	0.328766	0.859954
Blimp-1	107.332	94.7097	107.617	88.1669	91.6874	108.691	107.669	96.9781	95.1061	92.6443	-0.0342994	6.64918	0.0429219	0.836356	1
Blm	6.48986	8.69031	7.61994	9.11058	10.3213	7.77573	12.0077	9.1962	8.87287	10.157	-0.180068	3.42503	0.940312	0.33488	0.868861
Blos1	12.2309	16.2023	12.8953	16.7517	16.5141	12.1707	12.6081	12.5403	9.15015	13.2349	0.315202	3.93662	3.84413	0.0531135	0.458426
Blos2	9.9844	8.69031	8.90947	9.11058	12.5576	8.62092	11.0071	7.10615	10.8138	10.4648	0.0441586	3.20724	0.0727943	0.787949	1
Blos3	5.74103	8.83761	8.20609	7.34725	8.08501	6.59247	8.40539	9.82321	8.04104	7.69471	-0.0685702	3.03186	0.152365	0.814415	1
Blos4	8.73635	7.07009	6.79933	6.17169	7.39692	4.73305	6.60424	7.52416	9.15015	7.38692	0.0484084	2.98113	0.0672929	0.795932	1
blot	68.3932	68.3442	81.8264	70.5336	62.4438	80.969	75.4484	73.3606	68.2102	68.6368	-0.0612213	6.06118	0.46668	0.49633	1
blow	24.4618	29.3114	22.8598	32.9157	32.34	20.6226	24.4157	25.4985	21.0731	27.7009	0.248714	4.45103	3.4395	0.0670359	0.508074
blp	13.9782	22.5359	15.2399	17.3395	21.8467	17.918	18.4118	19.6464	21.3503	21.2374	-0.103808	4.31232	0.73044	0.401613	0.940512
blue	62.4025	64.8091	67.9933	68.7702	69.3246	65.7556	60.4388	71.6885	62.1101	65.5589	0.0338269	5.86849	0.133949	0.715259	1
blw	2730.73	2810.51	2956.89	2531.27	2653.78	2253.27	2416.95	2146.27	2430.61	2164.98	0.261891	11.0881	6.35064	0.0135555	0.218832
BM-40-SPARC	182.465	225.359	160.722	212.482	252.7	136.244	138.689	196.673	143.352	140.659	0.451395	7.43917	7.17878	0.00881815	0.173531
Bmcp	17.7223	19.8846	21.922	21.7478	16.8581	27.5531	26.6171	30.3057	25.7868	29.8555	-0.511691	4.73414	19.564	2.79706e-05	0.00212666
bmm	84.1186	98.5393	77.8406	93.457	73.2811	61.3607	55.2354	97.8141	54.6236	61.2499	0.367543	6.41391	3.82043	0.0538361	0.460272
bnb	302.278	327.433	207.966	364.129	384.124	362.079	343.621	351.546	357.133	378.272	-0.177783	8.4295	2.43995	0.121903	0.655469
bnk	0.24961	0	0	0	0	0	0	0	0	0	1.29239	-1.26169	1.22596	0.280509	0.807515
bnl	11.4821	13.2564	13.247	11.7556	13.7617	15.0443	13.2085	13.5853	13.5866	16.3128	-0.165517	3.43006	0.793255	0.375569	0.917235
BobA	0	0	0	0	0	0	0	0	0	0	0	-1.20567	0	1	1
boca	15.2262	19.0009	12.4264	16.7517	24.7711	16.3967	14.6094	17.1384	18.5776	22.1608	-0.00095021	4.29884	3.56317e-05	0.995251	1
bocksbeutel	31.7005	27.102	34.2311	32.034	28.7276	33.1314	31.22	26.5436	26.0641	27.0854	0.0888101	4.56679	0.616695	0.434407	0.964341
boi	4.49298	7.36467	8.67501	9.40447	8.94512	6.76151	7.80501	8.15118	8.04104	8.92586	-0.0136298	2.98297	0.00421237	0.9484	1
bol	234.633	225.948	272.442	210.719	201.265	311.029	322.007	268.153	283.932	247.462	-0.32307	8.06304	5.95004	0.0167437	0.244178
boly	0	0	0	0	0	0	0	0	0	0	0	-1.30545	0	1	1
bon	111.326	105.168	125.319	107.27	108.029	123.736	127.882	109.727	123.666	119.422	-0.116665	6.74921	2.52425	0.115728	0.651562
bond	67.6443	60.9795	90.3842	82.8769	66.9163	90.9422	72.4465	69.8075	60.4464	77.2549	-0.0106258	6.07824	0.00640298	0.936406	1
bonsai	16.2247	24.3034	17.7017	26.1562	26.3193	17.0728	17.0109	20.2734	18.3003	20.9296	0.243745	4.41122	2.96384	0.0886926	0.57299
bor	33.4478	35.3504	26.3767	39.969	39.737	60.5155	57.8371	57.0582	67.6556	60.3265	-0.80036	5.64378	59.0286	2.14906e-11	6.30655e-09
bora	0.24961	0.147293	0.11723	0.29389	0	0	0	0	0	0	2.73213	0.472976	2.306	0.133568	0.671945
borr	0	0.589174	0.23446	0.29389	0.172021	0.338075	0	0	0.831832	0.307788	0.0296127	0.964198	0.00079801	0.977531	1
boss	394.634	392.832	477.594	399.69	410.787	359.881	360.231	334.198	333.842	275.163	0.319107	8.30133	15.197	0.000189787	0.0105118
botv	30.9517	25.0399	27.7835	20.2784	26.3193	23.8343	25.4163	27.1706	25.2322	22.4685	0.0729844	4.61883	0.59064	0.444249	0.970985
bou	7.98752	11.3416	9.26116	9.11058	12.7296	9.12803	9.20591	9.4052	7.76376	9.23365	0.1802	3.57403	1.26623	0.263563	0.807515
bowl	21.4665	21.3576	23.5632	15.8701	17.3742	24.8485	18.6119	19.0194	23.2913	23.3919	-0.119672	4.43265	0.768274	0.38316	0.925119
BoYb	0	0	0	0	0	0.338075	0	0	0.554554	0	-3.00125	0.233314	4.02653	0.0483866	0.437967
br	58.6584	52.4365	54.0429	53.7818	49.0261	57.4728	57.8371	55.8042	62.3874	54.1707	-0.103798	5.52028	0.839744	0.361998	0.903348
Br140	32.4493	37.4125	22.8598	27.6256	33.0281	27.7222	31.8204	30.0966	24.4004	27.0854	0.115665	4.95266	0.821721	0.367176	0.908414
brat	84.8674	77.0345	114.768	65.8313	60.2075	105.818	105.268	93.007	97.3243	71.4069	-0.22918	6.66327	2.43331	0.122405	0.655469
Brca2	15.975	14.4348	14.1848	14.4006	15.654	18.9322	16.4105	13.7943	18.023	15.0816	-0.144517	4.1639	1.19536	0.277263	0.807515
Brd	0	0	0	0	0	0	0	0	0	0	0	-1.18369	0	1	1
Brd8	9.23557	9.57408	6.56487	13.225	12.5576	9.29707	9.80629	10.4502	8.87287	16.9284	-0.118407	3.54538	0.306115	0.58149	1
Bre1	33.947	47.2812	19.8118	47.0224	44.7256	34.9908	35.0225	43.6819	42.4234	52.6318	-0.116617	5.48894	0.385881	0.536094	1
Brf	35.195	31.6681	30.1281	40.5568	30.7918	34.8218	28.2181	27.3796	27.7277	28.9321	0.18232	5.07354	3.57866	0.0767042	0.527779
brk	9.48518	9.72137	7.73717	6.75947	7.74097	7.26862	5.6036	7.94217	9.98198	10.4648	0.0341372	3.35116	0.0364869	0.848958	1
brm	99.5944	100.307	73.7376	99.9225	112.158	86.0402	93.8602	100.113	99.5425	111.112	-0.014553	6.56348	0.0163227	0.898633	1
Brms1	23.713	34.7613	17.5845	27.9195	28.3835	23.6653	29.4189	31.1417	22.4595	30.471	-0.0533523	4.81379	0.165598	0.685051	1
brn	4.49298	5.59715	3.98581	3.52668	6.02075	4.90209	3.20205	4.8071	5.82282	1.53894	0.213928	2.31071	0.879028	0.351058	0.890259
Bro	0	0	0	0	0	0	0	0	0	0	0	-1.25585	0	1	1
brp	762.559	784.19	670.906	706.217	700.987	737.511	792.108	718.139	792.458	806.405	-0.0855898	9.50698	0.544156	0.462696	0.982672
bru	67.8939	60.8322	68.9311	60.5413	61.5837	67.277	65.2419	67.5085	64.051	62.1732	-0.0292063	5.90755	0.140061	0.70913	1
bru-2	45.1794	41.5368	56.9737	42.3201	40.081	46.6544	50.2322	37.8298	39.3734	40.6281	0.0752955	5.24611	0.365217	0.547193	1
bru-3	239.875	222.119	288.971	211.307	192.836	289.9	300.993	274.632	304.45	281.626	-0.328551	8.05128	5.81055	0.0180314	0.256036
Bruce	425.336	390.917	424.841	354.725	325.465	434.934	435.079	416.128	413.698	379.195	-0.113929	8.57699	1.60577	0.208462	0.756735
brv1	0	0	0	0	0	0	0	0	0	0	0	-1.30545	0	1	1
brv2	0	0	0	0	0.172021	0	0.400257	0	0	0	-0.899538	-1.04019	0.594367	0.444024	0.970985
brv3	0	0.147293	0.11723	0	0.688086	0.169038	0.200128	0.209004	0	0.307788	0.201531	-0.747445	0.0363189	0.849302	1
BRWD3	86.1155	98.8339	82.647	104.037	95.2999	87.2234	88.2566	89.6629	95.3834	90.4897	0.0492244	6.40579	0.199994	0.655835	1
bs	22.9641	15.7604	20.7497	11.7556	15.654	22.651	17.4112	18.1834	16.6366	19.0829	-0.10988	4.17514	0.752645	0.388022	0.929145
bsf	81.6225	95.2989	76.9028	81.9953	95.1279	134.216	126.881	130.001	131.429	119.114	-0.573932	6.82779	43.0787	3.62928e-09	7.49469e-07
Bsg	420.343	434.368	463.292	392.343	401.842	468.065	462.297	424.488	431.998	380.426	-0.0371556	8.82922	0.171203	0.680061	1
Bsg25A	0	0	0	0	0	0	0	0	0	0	0	-1.2771	0	1	1
Bsg25D	67.8939	72.763	46.7747	66.713	68.2925	62.3749	59.4381	60.8203	74.033	87.4119	-0.0915591	6.12482	0.629071	0.42985	0.962458
bsh	6.48986	5.59715	5.74426	4.40835	5.67671	4.0569	4.2027	3.76208	3.88188	5.2324	0.415311	2.32454	3.83769	0.0533088	0.458927
bsk	177.972	178.225	236.921	186.326	178.386	203.521	204.932	186.85	199.917	192.06	-0.0426488	7.49941	0.245026	0.621845	1
bt	1131.98	1592.98	1363.38	898.127	909.821	1515.76	1334.46	1108.56	1359.21	1418.29	-0.191668	10.0845	1.35134	0.248217	0.807515
BTBD9	57.6599	59.212	46.0713	54.6635	49.3702	54.9372	54.4349	49.7431	52.96	61.8654	-0.0379364	5.62515	0.157236	0.692683	1
BtbVII	182.964	179.993	156.853	181.624	164.625	162.276	163.705	164.905	172.744	174.516	0.046806	7.34398	0.448991	0.504586	1
btd	0.99844	1.32564	1.1723	1.76334	0.860107	1.69038	0.600385	1.67204	0.277277	1.84673	-0.0262399	0.789783	0.00441617	0.947168	1
Btd	0	0	0.468919	0.29389	0.516064	0.338075	0.200128	0.418009	0.554554	0	-0.168897	-0.630858	0.0409145	0.84401	1
Bteb2	0	0	0	0	0	0	0	0	0	0	0	-1.29099	0	1	1
BthD	0	0.147293	0.23446	0	0	0	0	0.209004	0	0	0.862683	0.369734	0.326971	0.56899	1
Btk29A	33.1981	33.7302	35.8723	27.6256	29.4157	37.5264	33.4214	31.1417	33.5505	31.0866	-0.0579418	5.25116	0.313351	0.577066	1
btl	10.7332	11.9308	15.0054	13.225	12.5576	15.5515	13.2085	13.7943	16.0821	12.0037	-0.150988	3.50501	0.960745	0.329712	0.861463
btn	0	0	0	0	0	0	0	0	0	0	0	-1.26416	0	1	1
btsz	273.573	311.82	284.634	300.062	288.48	333.511	312.801	306.819	328.296	305.018	-0.12129	7.99335	2.30852	0.132285	0.669571
btv	2.4961	4.4188	4.68919	2.05723	2.4083	4.90209	4.2027	2.92606	4.15916	5.84798	-0.379937	2.29957	1.28603	0.259889	0.807515
btz	50.6708	48.6068	40.4443	54.6635	46.4458	38.0335	41.6267	42.4279	39.3734	56.0175	0.147	5.59632	1.55363	0.215939	0.764511
Bub1	25.4602	25.9237	20.7497	21.7478	26.1473	23.8343	21.6139	22.3635	24.6777	23.6997	0.0484956	4.68366	0.158596	0.691426	1
Bub3	15.975	13.6983	18.0534	11.7556	18.2343	14.7063	15.4099	14.8393	16.3594	16.6206	0.0125257	4.11139	0.00752044	0.931093	1
BubR1	13.2293	6.7755	11.6058	4.99613	8.94512	6.25439	5.6036	8.56918	5.26827	8.92586	0.415172	3.15569	2.7879	0.0985662	0.60252
Buffy	23.2137	26.8074	28.8385	24.9806	25.2872	24.8485	21.4137	23.6175	21.0731	21.5452	0.200281	4.19936	2.48408	0.118626	0.655469
bun	616.787	539.094	558.952	532.234	539.287	612.592	597.383	584.795	598.087	557.712	-0.0828004	9.21542	1.32883	0.252165	0.807515
bur	91.3573	95.1516	83.5849	91.6936	90.9994	92.1255	87.6563	100.322	88.4514	80.9483	0.00846365	6.51203	0.0125741	0.910975	1
Burs	0	0	0	0	0	0	0	0	0	0	0	-1.24941	0	1	1
bves	87.3635	82.4843	94.1355	76.1175	83.7744	107.339	100.865	90.4989	105.088	87.4119	-0.211749	6.65787	5.53701	0.0208686	0.281735
bw	32.1997	37.5598	43.6095	48.1979	45.9297	37.8644	37.424	33.6497	40.4825	29.8555	0.208119	5.4188	2.8529	0.0947833	0.588945
bwa	72.1373	60.3903	78.3095	57.3085	60.0355	67.1079	62.2399	66.6724	67.3784	57.5564	0.0334234	6.02223	0.103862	0.748015	1
Bx	87.1139	69.9644	70.3379	76.9991	71.0449	95.6753	95.4613	96.7691	86.7878	88.643	-0.30747	6.40274	14.5128	0.000258658	0.0132311
Bx42	33.947	40.653	22.5081	37.6179	34.4043	27.3841	32.8211	33.4407	37.4324	35.3957	0.0212182	5.24679	0.0234358	0.878683	1
bxd	0	0	0	0	0	0	0	0	0	0	0	-1.29076	0	1	1
by	132.293	161.876	135.987	149.884	137.273	150.443	136.888	131.464	135.866	144.045	0.0378356	7.03783	0.319104	0.573597	1
byn	0	0	0	0	0	0.169038	0	0	0	0	-1.43716	-1.21322	2.01766	0.200926	0.746845
bys	12.7301	14.4348	9.8473	12.6373	12.7296	13.0159	13.8089	11.4952	14.1411	16.9284	-0.149233	3.85998	0.854848	0.357737	0.898074
Bzd	31.2013	24.598	17.4672	29.6829	27.6955	22.1439	19.8127	19.4374	20.2412	25.5464	0.275488	4.29684	5.17294	0.025396	0.313274
c11.1	126.802	101.485	104.686	90.2242	99.2564	104.465	96.8622	91.126	87.3423	91.4131	0.147354	6.56386	3.36537	0.0699918	0.508074
c12.1	23.9626	21.063	18.9912	16.1639	21.5027	17.918	18.8121	17.1384	23.5686	20.0062	0.0703102	4.51561	0.352664	0.554147	1
c12.2	37.1919	43.157	32.121	42.9079	39.909	36.6812	37.0238	36.7848	36.046	44.9371	0.0281905	5.24462	0.0484979	0.826213	1
C15	1.24805	1.17835	1.64122	1.17556	2.06426	0.845188	2.60167	2.09004	2.4955	1.53894	-0.34572	1.10264	0.964043	0.329178	0.860741
C1GalTA	55.1638	59.6539	55.5669	56.133	59.3474	60.5155	58.4375	53.7142	51.019	61.5577	0.00348759	5.83065	0.0025025	0.971459	1
c(2)M	0	0.294587	0.11723	0.58778	0.516064	0.169038	0	0.209004	0.277277	0	0.987738	-0.302006	0.900143	0.34563	0.883508
c(3)G	7.73791	6.33362	7.38548	10.2861	7.91299	12.6778	10.6068	10.0322	8.87287	8.92586	-0.399207	3.28219	3.72773	0.0567662	0.475483
C3G	199.438	174.395	185.106	179.861	160.668	197.605	201.729	182.67	174.685	186.827	-0.0699767	7.45446	0.910515	0.342616	0.881015
C901	0.99844	0.44188	0.586149	1.17556	0.860107	0.338075	0.400257	0.627013	0.831832	1.23115	0.248088	0.409203	0.237906	0.626947	1
ca	126.802	132.859	149.702	123.434	125.576	130.328	139.289	131.464	133.925	125.578	-0.00357753	6.92349	0.00179845	0.96627	1
Ca-alpha1D	618.284	571.793	635.386	474.338	472.715	655.528	681.637	595.245	644.947	620.193	-0.205473	9.11176	3.81737	0.05393	0.460272
Ca-alpha1T	940.032	864.76	922.364	827.888	780.633	920.072	1002.64	867.578	945.793	860.884	-0.0844548	9.78961	0.532493	0.467517	0.987518
Ca-beta	301.03	272.346	341.49	258.623	249.603	316.269	317.804	283.619	304.45	271.469	-0.0695005	8.16195	0.484504	0.488241	1
CaBP1	46.6771	45.661	44.3129	43.4957	61.5837	52.2326	48.231	70.0165	41.8689	49.2461	-0.115592	5.5527	0.723489	0.397332	0.938607
cac	414.602	420.081	487.559	403.805	369.674	481.926	542.348	473.395	520.172	468.762	-0.246371	8.93491	5.60549	0.0201168	0.274913
cact	176.474	160.55	105.155	156.349	140.886	129.483	125.28	129.792	127.27	137.889	0.18417	7.15203	3.99085	0.0488656	0.439406
cactin	13.7286	16.2023	4.22027	14.6945	14.6218	12.3397	12.6081	14.0033	12.4775	14.7738	-0.0825182	3.95013	0.113572	0.736924	1
cad	1.74727	1.03105	1.05507	2.05723	0.172021	0.845188	1.00064	0.418009	1.38639	0.923365	0.327637	1.36677	0.245046	0.62189	1
Cad74A	4.9922	9.1322	11.3713	7.64114	6.36479	9.63515	11.8076	9.61421	11.9229	8.31028	-0.347061	3.10794	4.77141	0.0356633	0.369603
Cad86C	11.4821	19.59	14.6537	16.7517	15.654	13.354	15.2098	10.2412	14.6957	14.1583	0.216474	3.96245	1.7998	0.183221	0.746845
Cad87A	104.087	112.974	123.795	115.793	107.513	102.606	105.067	96.7691	95.9379	98.4922	0.177624	6.466	4.99856	0.0279226	0.327533
Cad88C	1.99688	1.91482	3.16521	3.23279	1.72021	2.02845	1.60103	3.34407	1.38639	0.923365	0.330602	0.938797	0.978341	0.325346	0.855325
Cad89D	1.99688	2.79858	1.40676	3.52668	3.61245	2.53556	3.60231	2.29905	4.99099	2.15452	-0.241629	1.75696	0.544882	0.462399	0.982542
Cad96Ca	31.2013	31.8154	34.3483	33.5034	32.5121	32.1172	33.0212	32.6047	26.0641	29.8555	0.0852426	4.81902	0.689274	0.408679	0.94773
Cad96Cb	1.49766	2.2094	1.64122	2.64501	1.89224	2.19749	1.4009	1.25403	2.77277	1.84673	0.0582898	1.059	0.0256727	0.873073	1
Cad99C	36.4431	47.5758	35.2862	43.4957	44.2095	45.133	45.229	38.2478	41.037	44.3215	-0.0484696	5.27878	0.181245	0.671355	1
CadN	403.869	347.318	392.837	309.466	288.308	384.223	384.247	332.317	339.942	322.562	-0.0179216	8.29205	0.0281808	0.867073	1
CadN2	83.6194	79.8331	91.6737	80.5258	78.7858	84.6879	93.46	79.8397	90.1151	93.2598	-0.0887742	6.29508	0.962386	0.329301	0.860837
Caf1	24.2122	21.063	27.1973	30.5645	28.8996	27.3841	25.8166	25.0805	19.6867	33.2411	0.00540371	4.79206	0.00147232	0.96948	1
Caf1-105	3.74415	2.94587	3.63412	2.64501	6.36479	4.73305	4.40283	4.18009	4.71371	7.07913	-0.338343	2.72014	0.954072	0.331388	0.863987
Caf1-180	2.99532	2.79858	1.05507	3.52668	0.860107	1.18326	2.60167	2.50805	3.88188	3.38567	-0.310573	2.46432	0.354026	0.553384	1
cag	17.2231	12.6672	10.9024	12.3434	10.6653	12.6778	12.6081	10.0322	10.2593	12.3115	0.124377	3.58228	0.813819	0.4917	1
CAH1	319.251	310.347	316.989	334.447	375.351	229.722	217.339	226.77	228.754	207.757	0.57661	7.83682	73.5288	3.28369e-13	1.27735e-10
CAH2	134.789	174.543	204.332	151.353	177.526	180.363	204.932	153.618	184.667	133.888	-0.0238924	7.41991	0.0581322	0.810039	1
CAHbeta	8.23713	12.8145	9.0267	11.4617	11.5254	10.4803	8.80565	20.0644	8.31832	13.2349	-0.198138	3.83648	0.979676	0.325018	0.855325
cal1	25.2106	24.0088	18.6395	24.3929	24.5991	24.1724	27.0173	26.5436	28.8368	25.2386	-0.179343	4.86139	1.38402	0.242621	0.807515
CalpA	137.286	124.758	146.303	120.201	128.5	124.581	127.282	123.731	118.397	127.424	0.0813605	7.00248	1.46913	0.228758	0.784428
CalpB	90.8581	77.771	92.2599	75.8236	82.0542	77.2502	80.6518	72.3156	72.9239	69.2524	0.168904	6.29702	6.35077	0.0135547	0.218832
CalpC	8.98596	10.4578	7.61994	9.40447	8.94512	8.78996	5.80372	8.56918	8.59559	8.00249	0.188534	3.2913	1.3918	0.241311	0.807442
Cals	403.37	373.242	661.645	306.527	319.788	744.949	689.643	575.807	651.879	485.69	-0.6073	9.10136	10.3565	0.00181222	0.0594372
Calx	559.127	524.512	665.631	484.037	469.103	542.273	523.736	451.659	489.672	477.072	0.121596	8.95314	1.77977	0.185652	0.746845
calypso	12.4805	11.7835	9.96453	12.6373	14.4498	12.1707	12.6081	10.6592	13.3093	15.3894	-0.0631143	3.74234	0.187322	0.666224	1
Cam	2528.05	2811.39	2265.47	2771.97	2889.27	3076.82	3215.46	2908.51	3108.83	3135.75	-0.21945	11.4915	4.09235	0.0461417	0.42571
CaMKI	464.275	454.99	612.877	385.29	405.283	592.646	558.158	617.19	531.263	500.772	-0.269018	9.11899	5.18865	0.0251807	0.31204
CaMKII	649.985	578.569	904.897	515.483	516.408	753.063	720.863	645.197	681.547	617.731	-0.110445	9.60651	0.414513	0.521378	1
Camta	209.173	210.482	209.49	180.742	169.441	250.852	243.356	227.188	242.063	216.683	-0.268931	7.66584	6.99884	0.00967476	0.182703
can	0.49922	0	0.23446	0.58778	0.516064	0.507113	0	0.209004	0.277277	0.307788	0.308188	-0.23872	0.153127	0.745845	1
cana	22.9641	27.102	21.3358	28.5073	18.9224	24.0033	22.4144	22.5725	22.4595	24.3153	0.0312196	4.62962	0.0364812	0.848969	1
CanA1	19.7192	23.2724	24.2666	17.0456	16.17	20.6226	22.6145	18.1834	23.5686	24.0075	-0.100964	4.25443	0.521139	0.630708	1
CanA-14F	137.785	140.371	137.159	138.128	126.952	160.248	152.698	142.75	151.116	141.89	-0.1387	7.30728	1.59448	0.210055	0.75675
CanB	159.002	142.58	191.905	160.17	160.668	171.066	183.718	171.593	178.844	152.971	-0.0754766	7.33649	0.883316	0.349892	0.88838
CanB2	71.1389	92.353	84.171	77.293	84.9786	91.2803	94.2605	79.8397	95.1061	86.4885	-0.121902	6.6123	2.55801	0.113355	0.645367
Cand1	73.8846	67.3131	64.0075	61.423	62.9599	59.1632	67.4433	55.5952	64.051	61.2499	0.100163	5.87151	1.86132	0.175985	0.746845
Cap	36.4431	54.9405	29.8936	51.1368	55.735	34.6527	47.4304	41.8009	51.5736	62.1732	-0.0523804	5.59466	0.0954072	0.758149	1
CAP	521.435	563.398	436.564	489.914	511.764	544.977	526.738	475.694	552.336	536.475	-0.0632882	8.98902	0.658379	0.419343	0.959818
Ca-P60A	4433.82	5498.76	5412.38	3602.21	3951.68	4173.71	3738.4	3234.34	4004.44	3559.88	0.291491	11.7682	2.52842	0.115432	0.650333
Capa	82.8706	75.1197	62.8352	73.7663	57.2831	66.6008	74.0475	80.0487	76.5285	69.2524	-0.0620385	6.06979	0.17438	0.677275	1
CapaR	1.24805	1.32564	1.05507	2.35112	1.54819	1.52134	0.600385	1.25403	0.831832	2.15452	0.215049	0.856006	0.275203	0.621754	1
Cap-D2	2.74571	2.3567	3.16521	1.76334	5.16064	4.90209	3.20205	3.34407	4.43644	4.30904	-0.374523	2.23112	0.924056	0.339071	0.875118
Cap-D3	16.2247	12.5199	12.5436	14.9884	14.4498	13.523	11.4073	13.5853	13.032	13.8505	0.103468	3.95814	0.874925	0.498347	1
Cap-G	20.7176	23.4197	15.1226	17.0456	21.5027	18.4251	16.8108	20.4824	26.0641	23.6997	-0.0975302	4.49372	0.404183	0.526602	1
Cap-H2	56.4119	50.8162	54.5119	45.259	51.2624	55.1063	62.0398	44.0999	57.9509	59.0953	-0.104374	5.74744	1.61359	0.207368	0.756735
Capr	80.8737	93.8259	50.995	93.7509	84.9786	106.832	105.868	109.309	113.684	107.418	-0.429855	6.74775	10.1309	0.0020215	0.0642846
caps	112.075	105.02	152.282	103.155	102.353	106.325	106.869	108.682	106.474	93.8754	0.140535	6.57661	2.37648	0.126797	0.655469
Caps	723.869	669.449	1027.17	601.299	624.266	960.134	939.203	864.443	913.906	780.243	-0.289554	9.5513	6.30909	0.0138544	0.221094
capt	199.438	216.227	205.387	204.253	188.019	173.771	182.717	172.638	180.507	214.836	0.13359	7.39815	3.85621	0.052749	0.457404
capu	128.549	118.866	128.367	122.552	145.014	117.143	111.672	156.753	171.912	148.046	-0.13045	6.91229	1.59942	0.209356	0.756735
car	33.4478	28.2803	24.2666	29.389	27.5234	33.9766	30.0193	32.6047	32.4414	25.5464	-0.124882	4.97047	1.4811	0.226887	0.780264
cas	0	0	0.11723	0	0	0.169038	0	0	0	0	-0.215228	-0.292473	0.0259304	0.872481	1
Cas	24.961	22.6832	35.8723	25.2745	23.0509	29.7506	28.6184	26.9616	25.7868	24.6231	-0.0388242	4.78944	0.0354886	0.851013	1
CASK	454.54	400.491	377.597	412.327	385.844	368.84	413.866	397.736	398.447	368.73	0.0598285	8.45988	0.429168	0.514122	1
casp	66.6459	57.8863	56.1531	69.9458	65.5402	56.1205	64.0411	62.0743	57.3964	71.7147	0.0201545	6.01221	0.0721722	0.998056	1
Cat	207.676	283.098	304.798	272.142	235.153	177.997	178.114	183.088	180.507	168.36	0.55361	7.71688	20.4647	1.90754e-05	0.00153401
cathD	369.673	337.744	442.425	355.019	395.649	333.342	332.613	371.192	316.096	339.798	0.167146	8.41005	2.78629	0.0986616	0.602706
cato	0	0	0	0	0	0	0	0	0	0	0	-1.30545	0	1	1
Catsup	35.4446	29.1641	28.9558	35.8546	35.2644	27.5531	33.4214	35.5308	32.1642	30.471	0.0429597	5.30721	0.159743	0.84055	1
caup	9.73479	9.1322	9.26116	7.93503	9.80522	13.8611	13.4086	11.0772	15.2502	12.9271	-0.527966	3.59455	9.45525	0.00281157	0.0829439
cav	5.49142	3.68234	3.51689	2.9389	3.61245	2.36653	3.60231	5.01611	4.71371	2.46231	0.0788791	2.49615	0.0789644	0.779372	1
caz	55.9127	75.267	67.8761	62.0108	68.4645	78.0954	76.2489	72.9426	62.9419	80.6405	-0.167212	6.24674	4.028	0.0478491	0.43519
cbc	20.7176	17.3806	15.5916	17.3395	19.0944	16.3967	11.6074	18.1834	19.4094	17.5439	0.11749	3.99805	0.830717	0.364579	0.907032
Cbl	99.3448	92.2057	105.39	87.5792	85.1506	109.705	111.271	98.2321	102.315	90.7975	-0.125773	6.61251	2.92633	0.0907021	0.577311
CBP	8.48674	5.15527	4.68919	5.58391	1.37617	4.90209	4.60295	5.43412	5.82282	2.46231	0.0670764	2.72876	0.0381967	0.845503	1
Cbp20	14.727	16.055	14.8882	21.1601	18.2343	19.1013	16.4105	14.8393	15.8048	15.6972	0.0412995	3.99989	0.101903	0.992324	1
Cbp53E	409.361	382.668	469.154	375.297	367.954	423.946	452.09	403.17	459.448	367.191	-0.0709867	8.77543	0.529664	0.468698	0.989015
Cbp80	40.1872	38.4436	35.9896	36.4423	39.5649	38.8787	36.4234	36.9938	39.0961	43.3981	-0.0290148	5.32311	0.121367	0.728397	1
cbs	33.1981	41.2422	26.4939	36.1484	43.0054	41.5833	37.6241	38.2478	39.3734	55.7097	-0.23484	5.50802	2.8411	0.0954577	0.592036
Cbs	72.3869	55.5296	47.1264	62.0108	67.6044	55.9515	59.6383	66.8814	55.7327	83.7184	-0.08074	5.67539	0.34896	0.556231	1
cbt	73.8846	88.6707	69.6345	91.6936	86.6988	84.3498	81.2521	98.4411	89.5605	81.8717	-0.0868471	6.62421	0.798989	0.373857	0.916343
cbx	29.454	27.2493	29.4247	23.5112	29.4157	29.4125	30.4195	25.9166	24.1231	28.0087	0.0137753	4.76672	0.0200097	0.887836	1
Cby	0	0.294587	0.23446	0.29389	0.344043	0	0	0.209004	0.554554	0	0.725184	-0.394328	0.635504	0.427509	0.962458
CCAP	1.49766	2.3567	2.22737	2.35112	2.23628	2.19749	2.00128	2.09004	1.66366	1.84673	0.119105	1.23557	0.12597	0.723504	1
CCAP-R	4.9922	4.4188	3.51689	4.70224	2.4083	3.71883	6.40411	3.97109	3.6046	2.46231	-0.0530547	2.01276	0.0394699	0.842983	1
CCDC151	0	0	0	0	0.172021	0	0.200128	0	0	0	-0.194473	-0.797355	0.0256012	0.873266	1
Ccdc56	0	0	0	0	0	0	0	0	0	0	0	-1.30545	0	1	1
CCHa1	5.24181	5.00798	2.69629	5.29002	6.88086	3.38075	3.20205	5.22511	4.43644	3.07788	0.354027	2.399	1.88475	0.173317	0.746845
CCHa1-R	10.234	12.6672	20.6324	12.3434	11.3534	10.4803	13.6087	11.9133	13.032	9.54144	0.217545	3.47898	1.6354	0.204352	0.752291
CCHa2	18.4711	30.0479	15.826	13.5189	23.0509	22.482	15.0096	55.8042	19.4094	22.4685	-0.41194	5.21891	1.8624	0.17586	0.746845
CCHa2-R	9.73479	8.10114	9.37839	10.2861	10.3213	7.09958	10.4067	7.73317	7.20921	11.0804	0.137565	2.9004	0.536882	0.465693	0.984875
Cchl	127.8	156.868	108.555	135.777	150.691	114.1	120.477	123.104	145.016	124.654	0.116616	7.05747	1.30171	0.257026	0.807515
CCKLR-17D1	9.48518	12.8145	15.0054	13.8128	10.6653	13.8611	11.2072	10.2412	13.5866	14.1583	-0.0165574	3.59733	0.012198	0.912311	1
CCKLR-17D3	18.9704	13.8456	22.2737	21.454	21.3307	17.5799	14.2091	12.5403	18.8549	15.0816	0.321596	3.97766	5.04384	0.027242	0.323143
Ccm3	42.9329	49.3433	56.8565	48.7857	45.2416	61.3607	59.6383	54.3412	60.4464	49.8617	-0.230397	5.98781	4.11658	0.0455158	0.423204
Ccn	54.6646	57.739	49.1193	55.5452	59.3474	53.754	66.2425	56.6402	63.4965	62.1732	-0.128409	5.85112	2.16812	0.1445	0.693159
Ccp84Aa	0.74883	1.76752	4.22027	1.46945	4.12851	1.69038	6.20398	0.209004	1.10911	0.307788	0.368682	0.501346	0.278276	0.599174	1
Ccp84Ab	2.99532	4.27151	5.5098	8.81669	3.61245	1.69038	3.80244	1.88104	1.10911	0.307788	1.42251	1.31987	4.87702	0.0298404	0.33909
Ccp84Ac	0	0.294587	0	0.29389	0	0	0	0	0	0	2.39388	-1.24106	4.15305	0.0615965	0.489255
Ccp84Ad	0	0	0.11723	0.58778	0.172021	0	0	0	0	0	2.76882	-1.04854	3.22482	0.0776358	0.531108
Ccp84Ae	0	0	0	0	0	0	0	0	0	0	0	-1.17294	0	1	1
Ccp84Af	0	0	0	0	0	0	0	0	0	0	0	-1.29805	0	1	1
Ccp84Ag	2.4961	2.50399	3.04798	2.05723	3.44043	2.7046	2.8018	1.46303	3.6046	0.615577	0.27265	1.99316	0.691009	0.408092	0.946895
Ccs	8.98596	10.4578	9.49562	12.9312	15.4819	11.4946	13.2085	11.2862	14.6957	12.0037	-0.128907	3.73568	0.773563	0.381535	0.923741
Cct1	160.25	155.542	139.386	168.399	161.012	140.808	139.89	159.47	145.571	156.664	0.0789854	7.25654	1.18589	0.279162	0.807515
Cct2	90.6085	77.6237	70.2207	84.6403	98.7403	56.9657	69.6447	74.1966	77.0831	82.1795	0.230045	6.12131	4.42286	0.0383428	0.387141
Cct5	60.156	53.6148	36.6929	50.8429	50.0582	33.8075	34.8223	35.7398	36.3233	40.6281	0.468792	5.46661	9.60427	0.00261339	0.079049
Cctgamma	51.1701	45.2191	35.7551	47.6102	48.6821	35.3289	37.424	36.1578	33.5505	40.6281	0.31502	5.33523	4.16638	0.0442578	0.416367
c-cup	0	0	0.11723	0	0	0	0	0	0	0	1.22117	-0.936187	1.56956	0.280509	0.807515
Ccz1	19.9688	17.6752	22.3909	19.1028	19.6104	17.918	19.8127	18.8104	16.6366	17.2361	0.126332	4.2839	1.14647	0.287244	0.813311
cd	7.4883	8.54302	11.3713	8.81669	7.91299	12.0017	10.2065	10.4502	11.0911	3.69346	-0.115508	3.77093	0.362243	0.548826	1
CD98hc	350.453	332.736	295.419	321.515	346.795	386.589	393.653	393.137	392.625	387.505	-0.246549	8.64963	16.8234	9.19076e-05	0.00600523
Cda4	0.74883	0.883761	1.40676	4.40835	2.58032	1.01423	0.800514	1.46303	0.831832	2.15452	0.635363	0.982132	1.72523	0.192468	0.746845
Cda5	95.1014	116.951	137.979	101.98	97.8802	112.579	118.676	117.67	116.456	101.57	-0.0412866	7.14121	0.14596	0.703356	1
Cda9	1.49766	1.03105	1.40676	1.17556	1.54819	1.52134	0.600385	0.418009	1.10911	1.84673	0.302064	0.636625	0.34295	0.559644	1
CDase	57.4103	56.708	51.4639	64.9497	72.249	55.4443	52.4336	47.862	63.4965	56.3253	0.135573	5.87697	1.90864	0.170645	0.746845
cdc14	121.56	115.773	135.049	114.617	114.566	115.453	105.668	110.354	100.652	106.495	0.159574	7.02542	5.09365	0.0265135	0.319438
Cdc16	15.7254	11.1943	15.826	13.225	11.3534	16.5657	18.4118	17.5564	16.6366	14.1583	-0.31379	3.89474	4.91289	0.0292603	0.335691
cdc2	1.24805	0.147293	0.586149	0.58778	0.516064	0	0.200128	0.836018	1.38639	0.307788	0.187647	1.39423	0.0435783	0.835127	1
Cdc23	4.74259	3.38775	3.98581	7.05336	4.47256	4.0569	5.00321	5.22511	5.26827	4.00125	-0.0362908	2.47053	0.020237	0.887205	1
Cdc27	48.1747	52.1419	37.1619	52.3124	54.8748	46.6544	48.6312	53.9232	53.7918	47.3994	-0.0366135	5.59861	0.132209	0.717033	1
cdc2c	8.23713	6.92279	9.26116	13.225	9.11714	8.28284	9.60616	8.15118	10.8138	10.157	-0.0184819	3.31233	0.00562614	0.940381	1
cdc2rk	12.4805	12.2254	13.7159	14.1067	9.46118	15.2134	12.2078	11.9133	11.9229	11.696	-0.0335716	3.68698	0.0652584	0.798972	1
Cdc37	33.1981	44.6299	19.4601	34.679	45.5857	23.8343	26.417	26.5436	29.6687	40.6281	0.280869	5.15592	2.28889	0.13392	0.671945
Cdc42	105.835	98.5393	115.354	105.506	111.642	100.577	109.67	101.158	103.147	98.1845	0.0665247	6.67131	1.08944	0.29948	0.828248
CDC45L	9.48518	11.1943	10.5507	15.8701	10.8374	10.1423	13.8089	11.7043	11.3684	14.1583	-0.0870996	3.87373	0.176635	0.675315	1
Cdc5	23.4633	26.8074	16.2949	30.8584	32.34	23.4962	25.2162	21.3185	24.1231	30.1632	0.0572386	4.67973	0.119982	0.729889	1
Cdc6	0	1.17835	0.11723	0.58778	0.172021	0.507113	0.200128	0.209004	0	0.923365	0.223075	0.96099	0.0577025	0.810729	1
Cdep	485.242	439.229	455.086	416.148	363.653	411.776	440.082	404.633	430.889	380.734	0.0620857	8.58972	0.419673	0.518803	1
CdGAPr	96.5991	84.2519	84.171	73.7663	76.2055	77.9263	77.85	75.8686	81.7968	72.9458	0.102984	6.32206	1.20673	0.275006	0.807515
cdi	119.064	115.331	114.534	118.438	100.461	119.679	125.28	112.235	109.525	107.418	-0.0179058	7.01822	0.0364198	0.849095	1
Cdk12	60.156	61.4214	56.8565	58.4841	61.4117	61.3607	67.2432	66.4634	63.2192	64.9433	-0.115545	5.94411	2.56143	0.113118	0.644487
Cdk4	14.9766	17.3806	19.6946	14.6945	15.3099	20.7916	17.4112	17.5564	14.973	13.2349	-0.0343805	4.35087	0.0545697	0.815842	1
Cdk5	27.7067	25.0399	26.9629	24.099	24.427	19.4393	21.4137	20.6914	20.7958	18.4673	0.346182	4.57173	10.6169	0.00159821	0.0544843
Cdk5alpha	232.886	234.639	250.755	233.936	231.197	215.523	238.953	213.603	248.995	212.989	0.066963	7.77097	1.19748	0.27684	0.807515
Cdk7	7.23869	7.65926	8.67501	8.81669	8.08501	7.94477	9.20591	9.61421	8.04104	7.69471	-0.0741269	3.21356	0.149664	0.699799	1
Cdk8	4.9922	2.65128	2.81352	2.64501	4.8166	3.21172	3.00193	3.13507	5.82282	4.61682	-0.125057	2.2188	0.217948	0.641773	1
Cdk9	21.2169	27.102	19.2257	24.3929	23.911	15.0443	18.6119	21.3185	21.6276	24.6231	0.204579	4.40825	2.81592	0.0969152	0.596533
Cdlc2	0	0	0	0	0	0	0	0	0	0	0	-1.29815	0	1	1
cdm	203.682	190.009	181.706	192.204	186.127	180.532	194.125	185.178	183.835	207.449	0.00392168	7.26105	0.00507775	0.996389	1
CdsA	988.206	928.096	1480.14	911.352	925.475	1013.72	1008.65	926.099	945.515	792.863	0.159301	9.74586	2.43178	0.122521	0.655469
CecA1	4.49298	0	0.11723	1.46945	0	0	0	0	0.277277	0.307788	3.06276	2.34376	1.36938	0.245107	0.807515
CecA2	1.74727	0	0	0	0	0.169038	0	0	0	0	2.04072	1.58751	0.55747	0.45729	0.979275
CecB	1.74727	0.147293	0.11723	1.76334	0.172021	0	0.400257	0.627013	0	0.307788	1.19665	0.624845	0.606938	0.438526	0.967324
CecC	5.74103	0	0	18.2212	0.172021	0	0	0.209004	0	0	5.89375	2.00865	8.35394	0.0049075	0.119836
Ced-12	27.7067	30.4897	24.1493	29.9768	30.6198	26.877	29.619	28.6336	27.4504	25.5464	0.0445395	4.80813	0.195622	0.782023	1
ced-6	130.047	148.177	125.905	135.483	132.112	141.484	127.082	138.988	117.011	124.962	0.047303	7.42472	0.370432	0.544352	1
Cen	84.3682	87.0504	63.1869	93.457	92.3755	66.9389	75.8487	75.8686	80.6877	80.0249	0.146791	6.2983	1.8788	0.17399	0.746845
CenB1A	61.1545	66.8712	52.4017	64.3619	64.508	59.5012	58.6376	56.0132	56.2873	71.7147	0.0342914	5.98421	0.171541	0.679763	1
CenG1A	135.538	127.556	121.685	135.483	129.876	117.819	115.874	112.444	123.943	124.039	0.129612	6.85928	2.95893	0.0889526	0.573818
Cenp-C	4.74259	5.00798	4.45473	2.9389	4.8166	6.25439	5.80372	2.71706	4.99099	5.2324	-0.169168	2.96348	0.34454	0.558737	1
Cep135	10.234	11.3416	6.56487	11.7556	11.6975	6.08535	10.6068	8.98719	11.3684	11.0804	0.10279	3.4614	0.27156	0.603609	1
Cep89	0	0	0	0	0	0	0	0	0	0	0	-1.2483	0	1	1
Cep97	36.9423	49.4906	35.4034	44.9651	50.0582	44.2879	42.2271	43.4729	49.3553	48.6305	-0.0693429	5.50172	0.42359	0.516863	1
cer	22.4649	29.1641	23.0943	19.1028	24.083	17.5799	15.2098	21.1095	16.0821	19.6984	0.404917	4.551	7.29482	0.00830808	0.168857
Cerk	99.844	88.9653	97.418	87.8731	85.3226	85.0259	82.8532	83.8108	77.0831	83.1028	0.157071	6.436	6.30992	0.0138483	0.221094
cert	39.4384	45.0718	33.5277	46.4346	43.6934	45.9782	53.4343	42.4279	48.8008	46.1682	-0.190148	5.59057	6.35669	0.0135126	0.218832
cerv	12.2309	11.047	11.2541	13.8128	12.5576	12.5088	14.6094	15.8843	16.6366	14.1583	-0.282177	3.82754	5.34506	0.0231385	0.29812
Cf2	101.591	90.2909	103.631	78.1747	79.6459	97.8728	90.2579	96.9781	80.6877	89.5664	-0.00607212	6.55094	0.00344541	0.953327	1
Cfp1	11.9813	17.6752	8.20609	19.1028	17.8902	14.3682	14.2091	12.3313	16.9139	18.7751	-0.0372222	4.17625	0.0427916	0.836601	1
cg	224.899	210.924	209.372	227.177	219.843	233.272	247.359	226.77	234.577	230.841	-0.103351	7.79686	3.07001	0.0832652	0.549202
CG10000	0	0	0	0	0	0.169038	0.200128	0.209004	0	0.307788	-3.00141	-1.03165	7.41825	0.0105325	0.192432
CG10005	0.24961	0.294587	0.351689	0	0.172021	0.169038	0.200128	0	0.554554	0	0.351144	-0.757912	0.173839	0.677747	1
CG10011	159.75	158.93	142.669	144.3	139.509	161.769	162.704	154.245	171.912	132.657	-0.0729081	7.31117	0.414066	0.521602	1
CG10013	0	0	0	0	0	0	0	0	0.277277	0	-1.4844	-1.23566	2.14134	0.200926	0.746845
CG10014	0.24961	0	0	0	0	0.169038	0	0	0	0	-0.194564	2.43845	0.030641	0.867893	1
CG10019	22.9641	15.9077	28.8385	19.3967	23.3949	25.0176	28.018	21.7365	27.4504	29.2399	-0.239734	4.36495	2.36879	0.127405	0.65653
CG10026	9.48518	12.0781	9.37839	15.5762	9.97724	18.087	13.6087	22.9905	14.4184	16.005	-0.613901	3.93782	8.02635	0.00572628	0.131752
CG10029	0	0	0	0	0	0	0	0	0	0	0	-1.29851	0	1	1
CG10031	12.4805	24.598	15.0054	22.0417	20.6426	14.8753	12.6081	34.6947	10.2593	15.0816	0.104358	4.59264	0.115947	0.734291	1
CG10032	0	0	0	0	0	0	0	0	0	0	0	-1.29805	0	1	1
CG10035	0.74883	0.736467	0.820609	0	0.172021	1.18326	1.00064	0.627013	0	0	-0.217757	0.103006	0.122702	0.726967	1
CG10038	10.9828	11.1943	12.4264	13.8128	11.0094	10.4803	9.20591	13.7943	8.04104	13.2349	0.115353	3.57252	0.536121	0.466009	0.985204
CG10041	0	0	0.23446	0	0.172021	0	0	0	0	0	2.3148	-0.747885	3.4231	0.0678413	0.508074
CG10050	6.48986	4.5661	7.97163	3.82057	6.53682	4.73305	4.60295	6.89715	8.04104	3.38567	0.112655	2.61481	0.295959	0.587816	1
CG10051	0.49922	0.294587	0.586149	0	0.344043	0.676151	0.400257	0	0.554554	0	0.0951083	-0.251973	0.0162122	0.898975	1
CG10053	4.9922	5.44986	1.75845	2.64501	3.26841	4.0569	4.80308	3.13507	3.6046	6.46355	-0.278006	2.10231	1.18609	0.279121	0.807515
CG10055	19.7192	22.3886	16.4122	18.5151	19.4384	19.9464	22.2143	20.9004	21.0731	19.3907	-0.103563	4.47945	0.643454	0.424644	0.962458
CG10062	13.4789	17.8225	21.4531	13.8128	15.998	17.4109	17.4112	13.1673	14.6957	11.696	0.157392	3.60266	0.996042	0.321032	0.850105
CG10063	0.24961	0	0	0	0.344043	0	0	0	0	0.307788	0.918599	-1.08449	0.635638	0.428281	0.962458
CG10064	0	0	0	0	0	0	0.200128	0	0	0.307788	-2.19436	-0.831863	3.28103	0.0743041	0.519383
CG10068	19.22	20.1792	24.8527	19.6906	21.8467	21.2987	24.6158	19.0194	21.6276	16.6206	0.0380286	4.5937	0.102598	0.749501	1
CG10073	0	0.147293	0.351689	0.58778	0.172021	0.338075	0	0.209004	0.277277	0	0.432782	-0.417945	0.183559	0.669389	1
CG10075	17.4727	24.3034	20.5152	26.1562	24.427	20.4536	19.4125	20.4824	15.8048	25.5464	0.151803	4.46526	1.76514	0.187452	0.746845
CG10077	2888.49	2433.44	3408.57	2503.94	2445.63	2865.53	2918.47	2751.54	2642.73	2759.01	-0.0268322	11.2953	0.0846224	0.771819	1
CG10081	0	0	0	0	0	0	0	0	0	0	0	-1.29808	0	1	1
CG10082	410.359	404.026	363.999	390.286	413.196	394.534	397.655	418.009	409.816	465.991	-0.0736649	8.60236	1.2856	0.259968	0.807515
CG10086	0	0	0	0	0	0.169038	0	0	0	0	-1.43772	-1.05947	1.22586	0.276683	0.807515
CG10089	81.3729	60.8322	86.9845	71.7091	71.2169	75.0527	77.85	70.8525	78.1922	61.2499	0.0335745	6.12206	0.14245	0.706775	1
CG10092	13.9782	16.9387	13.8331	15.8701	13.2457	14.7063	16.4105	15.4663	11.6456	19.3907	-0.0700447	3.99127	0.407074	0.525131	1
CG10096	0	0	0	0	0	0	0	0	0	0	0	-1.30545	0	1	1
CG10097	0	0	0	0	0	0	0	0	0	0	0	-1.30545	0	1	1
CG10098	45.9283	48.165	49.471	48.4918	52.1225	45.6402	42.4272	48.071	55.1782	53.5552	0.00111784	5.54119	0.00018876	0.98907	1
CG10103	106.833	81.0114	70.1034	87.5792	90.4833	71.1648	70.8455	65.6274	74.8649	71.7147	0.296485	6.15732	14.5393	0.000255561	0.0131128
CG10104	0	0	0	0	0	0	0	0	0	0	0	-1.28358	0	1	1
CG10116	0.74883	0.883761	0.468919	0.58778	0.860107	0.338075	1.00064	1.25403	0.277277	0.307788	0.105754	0.183912	0.0322332	0.878446	1
CG10126	31.9501	35.3504	32.121	32.034	28.7276	38.2025	35.6229	34.6947	34.1051	39.7047	-0.185334	5.26568	2.76344	0.100033	0.603707
CG10131	10.7332	13.551	9.8473	14.4006	11.3534	13.692	10.8069	10.2412	10.5365	7.38692	0.157962	3.58612	0.557595	0.45724	0.979275
CG10132	144.524	140.665	122.388	145.475	135.381	123.228	132.685	123.313	136.975	144.968	0.0581757	6.94382	0.345575	0.558149	1
CG10133	6.73947	7.95385	5.97872	6.46558	5.84873	7.43766	7.00449	6.27013	7.48649	7.07913	-0.0955753	2.89973	0.320371	0.572839	1
CG10137	98.8456	87.4923	86.8673	91.9875	88.075	86.5473	85.4548	76.2866	79.3013	87.7197	0.124735	6.34091	3.17629	0.0781959	0.532533
CG10139	14.9766	16.2023	15.4743	17.3395	19.6104	16.5657	15.2098	16.5114	11.9229	17.2361	0.106705	4.05346	0.608319	0.437534	0.966791
CG10140	0	0	0	0.29389	0	0.169038	0.400257	0.209004	0	0	-1.67014	-0.91156	2.71618	0.103108	0.61181
CG10144	24.4618	21.3576	28.4868	22.9234	23.0509	25.0176	28.018	25.7076	27.7277	24.0075	-0.114268	4.55439	1.17961	0.280429	0.807515
CG10147	10.4836	8.54302	10.199	9.69836	8.08501	15.0443	14.4092	11.2862	10.2593	11.3882	-0.423312	3.54101	6.10523	0.015424	0.236273
CG10151	25.7098	30.1952	22.2737	31.1523	24.5991	27.046	25.4163	21.9455	22.7367	27.0854	0.101834	4.60787	0.663798	0.417443	0.958485
CG10154	0	0	0	0	0	0	0	0	0	0	0	-1.30545	0	1	1
CG10157	11.7317	18.4117	8.67501	14.9884	14.9659	10.6494	10.6068	25.0805	8.31832	14.1583	-0.0102482	3.75936	0.00156457	0.968539	1
CG10158	17.4727	17.3806	14.302	18.5151	17.8902	19.7774	16.4105	20.0644	21.0731	20.6218	-0.198834	4.26453	2.54148	0.11451	0.648411
CG10163	0.24961	0	0	0	0	0	0	0	0	0	1.29214	-1.22641	1.15122	0.2906	0.817518
CG10164	0	0	0	0	0	0	0	0	0	0	0	-1.24807	0	1	1
CG10165	5.74103	6.48091	10.6679	6.17169	7.74097	8.11381	7.00449	7.31516	4.43644	8.00249	0.0986199	3.10834	0.251036	0.617609	1
CG10166	19.7192	16.9387	22.6254	19.3967	17.8902	18.9322	15.2098	18.6014	15.5275	16.3128	0.18809	4.18526	2.26863	0.135632	0.675539
CG10168	0	0	0	0	0	0	0	0	0	0	0	-1.28375	0	1	1
CG10170	0	0	0	0	0	0	0	0	0	0	0	-1.00613	0	1	1
CG10171	10.9828	9.27949	12.778	10.8739	8.94512	14.0301	11.2072	11.4952	10.8138	12.6193	-0.188101	3.79855	1.5422	0.217622	0.766551
CG10175	55.4134	68.9333	100.583	53.1941	47.822	75.0527	55.8358	49.9521	58.5055	59.7109	0.132735	6.0865	0.707114	0.402704	0.941708
CG10176	16.2247	19.0009	33.176	20.8662	20.6426	26.877	20.213	17.1384	17.7457	23.6997	0.069362	4.36257	0.133209	0.716011	1
CG10177	0.99844	0.147293	0.703379	0.881669	1.03213	0.845188	0.600385	0.418009	0	0.923365	0.341045	-0.061879	0.36014	0.581282	1
CG10178	15.4758	20.7684	23.0943	20.5723	27.1794	29.4125	17.0109	39.7109	24.4004	23.0841	-0.314423	4.86079	2.93516	0.0902245	0.576465
CG10182	0	0	0.11723	0	0	0.169038	0.200128	0.209004	0	0	-1.39751	-0.962565	1.2235	0.272621	0.807515
CG10183	0	0	0.11723	0	0	0.169038	0	0	0	0	-0.2171	-1.09625	0.0309291	0.867893	1
CG10184	11.2325	12.6672	12.3091	13.8128	18.0623	7.94477	7.00449	12.7493	8.59559	11.3882	0.523916	3.53662	8.11904	0.00546475	0.127426
CG10185	2.74571	16.6442	1.75845	2.05723	8.94512	1.52134	47.2303	0.836018	15.8048	3.07788	-1.0333	4.85916	1.52442	0.22027	0.769731
CG10186	1781.22	1651.9	1456.81	1779.8	1795.22	1485.16	1631.65	1513.4	1612.37	1719.92	0.0882342	10.4472	1.26266	0.264233	0.807515
CG10188	136.786	122.254	109.258	122.846	120.071	110.043	114.073	116.625	125.607	112.958	0.0764016	6.77495	0.908491	0.343151	0.881638
CG10189	23.713	20.3265	22.6254	21.454	23.5669	18.2561	22.0141	17.9744	20.2412	15.0816	0.250353	4.01575	3.48259	0.0653801	0.505801
CG10194	12.2309	12.3727	15.1226	12.0495	14.9659	14.3682	15.61	12.3313	14.973	17.5439	-0.148623	3.92168	1.16125	0.299493	0.828248
CG10195	9.9844	13.6983	14.8882	13.225	12.2135	13.8611	14.009	15.8843	11.3684	10.4648	-0.0366064	3.95767	0.0727286	0.799166	1
CG10202	0	0	0	0	0.172021	0	0	0	0.277277	0.307788	-0.956623	-0.661446	0.736558	0.432237	0.962458
CG10205	79.6256	85.8721	82.647	67.3008	70.5288	73.0243	70.6453	66.0454	68.4875	92.3365	0.0643991	6.25391	0.288718	0.592412	1
CG10208	5.74103	6.48091	4.68919	4.11446	5.67671	5.91632	5.00321	8.98719	5.54554	8.61807	-0.33041	2.85512	3.07772	0.0828859	0.547348
CG10209	20.7176	21.063	8.20609	17.3395	17.2021	15.8895	14.4092	15.6753	15.8048	16.6206	0.0942517	4.06542	0.33887	0.765519	1
CG10211	79.8752	90.2909	117.347	69.358	76.5495	134.047	113.473	71.2705	100.374	94.7988	-0.241852	6.27049	2.59933	0.110523	0.635886
CG10214	11.7317	12.0781	14.6537	13.5189	11.1814	10.3113	12.2078	12.7493	12.4775	10.4648	0.12039	3.75384	0.871519	0.353114	0.891552
CG10217	55.9127	58.3282	64.0075	54.9574	51.6064	53.4159	53.6344	46.608	46.5826	45.2449	0.213597	5.68205	7.28727	0.00834033	0.169034
CG10219	184.961	214.312	267.987	170.456	192.32	193.21	205.532	167.413	203.244	169.591	0.135769	7.37345	1.17652	0.281055	0.807609
CG10222	4.9922	4.5661	5.39257	3.23279	4.47256	5.57824	6.40411	4.5981	4.71371	4.30904	-0.167613	2.64265	0.543066	0.463143	0.983122
CG10226	172.231	206.8	229.067	190.441	210.038	195.746	208.934	194.165	186.33	183.442	0.0593025	7.25651	0.446434	0.505799	1
CG10232	0.74883	0.44188	1.05507	0.58778	0.344043	1.69038	0.600385	1.25403	0.554554	3.07788	-1.08161	0.473712	3.68374	0.0582167	0.482791
CG10237	109.329	149.208	166.935	131.369	119.211	192.196	164.906	121.432	163.039	163.436	-0.249355	7.20554	4.87348	0.0298983	0.339378
CG1024	10.7332	13.2564	11.1368	10.8739	15.1379	14.8753	10.8069	12.5403	14.1411	14.466	-0.117135	3.9177	0.801095	0.373231	0.915804
CG10249	120.811	113.711	127.546	126.667	114.738	116.298	117.876	113.698	109.802	124.346	0.0520713	6.99613	0.83381	0.363692	0.905699
CG10252	0	0	0.23446	0	0.344043	0	0.200128	0	0	0	1.20901	-0.981903	1.16958	0.283138	0.809526
CG10253	54.9142	44.4826	47.3608	53.4879	46.1018	49.359	56.036	49.5341	47.4144	56.633	-0.0758255	5.55793	0.821905	0.367123	0.908414
CG10254	87.3635	84.6937	97.5352	83.4647	88.9351	93.3088	96.662	92.171	98.7107	88.3352	-0.0848401	6.53951	0.564495	0.454478	0.9765
CG10257	17.4727	16.4969	15.7088	18.8089	20.4706	16.5657	17.211	13.5853	17.4685	17.2361	0.113909	4.37351	0.759341	0.385928	0.92737
CG10262	9.73479	10.1632	10.5507	9.69836	10.4933	7.26862	6.20398	10.8682	5.82282	8.61807	0.387506	3.19087	4.94488	0.0287529	0.332118
CG10264	0.24961	0	0	0	0	0	0.200128	0	0	0.307788	-0.903326	-1.24029	0.679228	0.432237	0.962458
CG10265	6.98908	6.92279	7.38548	10.8739	9.28916	7.26862	7.00449	7.10615	9.98198	10.157	0.000387203	3.22879	4.89683e-06	0.998239	1
CG10268	5.24181	5.89174	4.92365	5.58391	8.08501	16.7347	20.6132	17.7654	16.3594	16.3128	-1.55933	3.15318	82.9103	2.68655e-14	1.21454e-11
CG10274	17.7223	13.1091	10.3162	13.225	14.2778	11.4946	15.4099	14.4213	15.2502	15.0816	-0.0694592	3.91405	0.224171	0.637063	1
CG10280	0	0	0	0	0	0	0	0	0	0	0	-1.24843	0	1	1
CG10283	42.6833	46.5447	40.0926	45.8468	51.2624	42.5975	50.0321	46.399	52.96	47.0916	-0.0770823	5.66142	0.802618	0.372779	0.915232
CG10286	9.73479	11.3416	8.79224	11.1678	11.1814	11.1565	10.2065	11.4952	7.76376	11.0804	0.00359746	3.60222	0.000430159	0.9835	1
CG10289	139.532	130.944	149.702	115.499	116.459	163.967	166.907	152.155	162.207	155.741	-0.295296	7.25068	9.43556	0.0028389	0.0831635
CG10298	0	0.147293	0	0	0	0	0	0	0	0	1.2458	-1.27746	1.76703	0.280509	0.807515
CG10300	0	0	0	0	0	0	0	0	0	0	0	-1.02446	0	1	1
CG10301	0	0	0	0	0	0.169038	0.400257	0	0	0	-2.61502	-0.950722	4.90811	0.0297586	0.339081
CG10306	100.593	108.85	81.9436	107.858	116.459	79.4477	86.6556	91.544	96.4925	91.1053	0.211925	6.796	4.38849	0.039084	0.390137
CG10307	42.4337	50.2271	37.9825	34.679	42.3173	31.272	37.0238	33.0227	39.9279	43.3981	0.179513	5.10287	1.4971	0.224415	0.777333
CG10311	73.3854	76.4453	109.258	62.8924	75.1734	98.0418	95.8615	91.544	79.8558	84.9496	-0.176165	6.19721	2.65466	0.106855	0.624298
CG10317	0	0.294587	0.351689	0	0.172021	0.169038	0	0.209004	0.277277	0	0.492455	-0.886531	0.251437	0.617808	1
CG10320	116.318	168.356	126.843	144.594	152.583	107.846	119.477	108.055	126.161	137.274	0.245909	6.99346	3.45524	0.0664257	0.508049
CG10321	58.6584	57.2972	36.9274	57.0146	56.423	47.8377	49.4317	52.4601	47.6917	54.7863	0.0739133	5.70899	0.507391	0.604343	1
CG10324	5.24181	8.69031	2.69629	7.64114	7.74097	4.73305	5.00321	6.06113	6.1001	8.61807	0.0752119	2.84345	0.0803443	0.777503	1
CG10326	80.6241	86.0194	82.9987	86.1097	87.5589	86.7163	90.8583	92.798	92.8879	88.3352	-0.0930015	6.37914	1.76826	0.187067	0.746845
CG10332	0	0	0	0	0	0	0	0	0	0	0	-1.30545	0	1	1
CG10333	33.6974	35.2031	22.1564	34.679	35.9525	27.2151	27.8179	28.8426	29.9459	37.2424	0.0977011	5.00522	0.488105	0.486634	1
CG10336	1.24805	1.76752	1.52399	1.17556	1.54819	1.69038	1.60103	2.29905	2.21822	2.46231	-0.444166	1.26183	0.950706	0.332238	0.864955
CG10337	6.98908	1.03105	2.93075	1.46945	1.03213	2.19749	2.60167	3.34407	2.4955	1.23115	0.107453	1.62132	0.0983939	0.91201	1
CG10338	15.975	12.8145	16.6466	15.2823	18.0623	20.7916	19.4125	19.0194	16.0821	17.2361	-0.238615	4.33532	3.97359	0.0493458	0.441328
CG10339	7.4883	10.7524	8.90947	5.8778	8.25703	9.80418	9.40604	5.22511	9.98198	7.69471	-0.00586892	3.15341	0.00093436	0.975684	1
CG10340	37.1919	43.7462	34.9345	47.904	46.7898	32.9623	30.4195	32.6047	41.037	39.7047	0.255565	5.26226	4.77696	0.0315242	0.346455
CG10341	12.7301	12.0781	9.37839	13.8128	15.654	14.7063	12.6081	12.9583	13.8639	13.8505	-0.106429	3.77181	0.445506	0.50624	1
CG10343	10.234	11.047	7.26825	8.81669	11.6975	7.77573	9.00578	6.89715	10.5365	7.69471	0.230086	3.54069	1.68241	0.198026	0.746845
CG10344	3.99376	2.3567	5.39257	3.52668	2.92436	4.90209	4.2027	4.8071	2.77277	3.38567	-0.152756	2.11379	0.302629	0.583645	1
CG10345	67.8939	114.594	87.4534	76.4114	89.1071	99.0561	84.4542	74.1966	86.5105	96.6455	-0.0124044	6.47468	0.00475162	0.945202	1
CG10347	23.2137	18.1171	23.446	15.8701	19.2664	18.9322	23.0148	24.0355	18.3003	19.0829	-0.0464052	4.38572	0.148086	0.72569	1
CG10348	3.74415	6.03903	4.10304	5.58391	4.64458	5.4092	5.80372	5.22511	4.43644	3.69346	-0.0467814	2.47781	0.044678	0.833091	1
CG10352	18.7208	14.5821	25.3216	11.1678	22.3628	18.4251	19.2123	17.3474	11.0911	13.5427	0.215386	4.03851	2.05665	0.15512	0.715186
CG10353	136.786	143.317	150.875	146.945	133.833	166.333	156.1	153.409	162.484	152.663	-0.152291	7.54977	4.83071	0.0306074	0.342527
CG10357	0	0.147293	8.20609	0	0.172021	0	0.200128	0	0.277277	0	4.15794	1.26081	5.08798	0.0267175	0.319438
CG10359	9.23557	15.0239	18.5223	11.4617	11.6975	12.1707	13.8089	7.73317	7.48649	9.23365	0.394298	3.46047	4.80472	0.031047	0.343695
CG10361	3.49454	5.89174	5.39257	4.11446	7.39692	5.57824	3.60231	7.94217	2.21822	4.61682	0.139103	2.997	0.256203	0.614019	1
CG10362	105.335	97.361	84.8744	105.8	100.977	85.195	83.8538	81.5118	87.065	95.1066	0.19091	6.47814	6.1048	0.0154276	0.236273
CG10365	62.1529	54.6459	35.7551	54.6635	52.9826	54.092	42.4272	50.5791	44.3644	57.8642	0.0555851	5.61501	0.303133	0.986706	1
CG10366	15.4758	21.5048	16.1777	19.3967	19.7825	17.2418	20.8134	24.2445	19.964	25.2386	-0.211709	4.43305	2.74079	0.101412	0.607482
CG10375	20.2184	22.5359	14.5365	23.2173	25.8032	18.4251	19.0122	19.0194	25.2322	25.5464	-0.00899423	4.40598	0.00491559	0.944266	1
CG10376	26.7083	26.0709	27.9007	23.8051	28.7276	35.3289	34.0218	31.5597	31.8869	33.5489	-0.317093	5.08569	10.6448	0.00157693	0.0541628
CG10383	53.6662	46.3974	37.3963	57.0146	31.824	29.0745	32.4208	38.2478	37.4324	39.3969	0.352292	5.54183	3.09874	0.0818604	0.544951
CG10384	139.282	109.144	129.422	115.205	101.149	104.972	116.675	112.026	113.406	103.417	0.109315	6.76053	1.67538	0.198958	0.746845
CG10395	12.2309	14.8766	15.826	11.4617	14.4498	16.9038	19.6126	15.6753	17.1912	15.6972	-0.291755	4.07598	3.15627	0.0791244	0.534969
CG10396	0	0	0.11723	0.29389	0	0	0.400257	0.418009	0	0	-1.06112	-0.744841	1.08602	0.300237	0.828552
CG10399	4.74259	5.59715	3.16521	5.29002	3.44043	4.90209	4.80308	4.5981	4.43644	3.69346	-0.0443648	2.25751	0.0314195	0.859719	1
CG10405	0	0.147293	0	0	0.172021	0	0	0	0	0	1.91301	-0.89003	1.88656	0.173672	0.746845
CG10407	9.23557	10.3105	12.3091	9.99225	11.5254	7.94477	7.40475	8.56918	5.26827	6.15577	0.586474	2.8238	6.28841	0.0140057	0.22164
CG1041	32.4493	32.11	28.4868	25.8623	28.2115	31.1029	26.2168	37.2028	27.1732	27.3932	-0.0211359	4.94796	0.036772	0.848376	1
CG10413	93.6038	87.0504	130.711	82.583	78.4418	100.746	96.4619	100.322	97.8789	66.4823	0.0333596	6.50155	0.0913484	0.76319	1
CG10417	82.3713	88.818	120.629	91.6936	91.5154	121.707	116.675	112.862	102.038	99.4156	-0.217119	6.71051	4.63999	0.0339946	0.361824
CG10418	8.48674	5.30257	4.57196	3.52668	5.84873	6.08535	5.20334	7.94217	6.1001	6.46355	-0.201714	2.52509	0.876995	0.351613	0.890586
CG10420	16.7239	17.6752	13.5987	17.0456	19.2664	19.2703	20.6132	22.9905	17.4685	20.0062	-0.257282	4.08094	3.4694	0.0658822	0.506543
CG10424	16.2247	16.055	14.8882	18.5151	14.2778	13.523	13.6087	18.8104	16.0821	14.466	0.0570823	3.99328	0.181805	0.682718	1
CG10425	15.975	13.4037	13.9503	12.9312	14.4498	13.0159	13.0083	13.3763	13.032	13.2349	0.10582	3.99182	0.729801	0.395289	0.937347
CG10426	35.6942	31.9627	40.6787	30.2707	34.9204	33.6385	33.2213	28.4246	32.4414	35.0879	0.0982669	5.04272	1.20976	0.274407	0.807515
CG10428	22.4649	25.0399	26.3767	22.0417	24.7711	26.877	25.6164	25.2895	26.8959	20.6218	-0.0516479	4.80932	0.282062	0.620752	1
CG10431	4.49298	4.12422	5.04088	4.70224	3.09639	3.71883	2.40154	2.50805	4.43644	3.69346	0.368002	1.99759	2.82545	0.0963609	0.59543
CG10433	319.002	298.417	300.108	323.279	365.89	205.888	188.121	283.41	194.094	226.84	0.548449	8.17585	21.1739	1.41501e-05	0.0011954
CG10435	27.7067	36.8234	29.6591	39.0873	33.5442	29.9197	26.2168	30.3057	28.005	34.1645	0.166863	4.95877	2.23918	0.138164	0.680816
CG10440	36.4431	36.6761	45.8369	42.3201	33.5442	37.1883	42.2271	35.9488	47.6917	40.0125	-0.0560007	5.22692	0.356363	0.688581	1
CG10444	81.1233	80.2749	115.94	72.2969	83.7744	86.3782	84.6543	78.7947	79.024	63.4044	0.146039	6.05944	1.42219	0.23628	0.797818
CG10445	0.49922	0.736467	1.1723	1.76334	0.516064	1.18326	1.60103	1.04502	1.94094	0.307788	-0.417881	0.7218	0.758902	0.386065	0.927566
CG10459	0	0.44188	0.11723	0.58778	0.516064	0.676151	0.400257	2.71706	0.554554	0.923365	-1.64869	0.120563	7.44787	0.00768196	0.161862
CG10462	41.1857	40.9476	39.8581	39.3812	36.9846	40.9071	28.4182	36.5758	28.2823	32.6256	0.244471	5.08498	4.89771	0.0295043	0.337795
CG10463	5.49142	3.82963	4.10304	4.70224	4.30054	3.88787	5.20334	4.38909	6.93193	5.84798	-0.222861	2.57287	1.10087	0.296975	0.825191
CG10465	40.9361	46.5447	65.5315	41.7324	47.6499	74.2075	71.2457	60.6113	70.1511	49.8617	-0.42169	5.92573	13.1127	0.000491834	0.0216497
CG10466	5.24181	4.5661	5.04088	5.8778	4.98862	3.88787	4.60295	3.13507	4.71371	6.15577	0.203863	2.41575	1.09463	0.29834	0.826894
CG10467	10.9828	10.3105	11.8402	11.1678	12.3855	8.62092	12.6081	13.5853	8.87287	9.54144	0.0867081	3.4847	0.344295	0.558877	1
CG10469	4.49298	3.68234	5.62703	6.46558	4.98862	4.90209	4.80308	4.8071	3.05005	5.2324	0.130534	2.11166	0.34279	0.559736	1
CG10470	15.975	19.1482	21.3358	17.9273	22.5348	20.4536	18.0116	18.1834	17.4685	18.1595	0.0767825	4.40374	0.345595	0.558137	1
CG10472	4.24337	3.24046	4.57196	6.17169	4.64458	2.87364	6.20398	3.34407	4.71371	5.2324	0.0259645	2.56379	0.00695808	0.933713	1
CG10474	0	0	0	0	0	0	0	0	0	0	0	-1.29821	0	1	1
CG10476	0	0	0	0	0	0	0	0	0	0	0	-1.30545	0	1	1
CG10477	0	0	0	0	0.172021	0	0	0	0	0	1.26003	-0.229619	0.858604	0.357656	0.898074
CG10479	24.4618	31.6681	18.5223	27.9195	34.7483	24.6795	26.0167	24.4535	25.5095	24.9308	0.126291	4.79414	0.952144	0.331874	0.864413
CG10481	0	0	0	0	0	0	0	0	0	0	0	-1.29879	0	1	1
CG10483	47.6755	48.7541	55.6842	53.1941	50.0582	49.8661	46.2297	42.2189	54.0691	51.4006	0.0700272	5.55017	0.791585	0.37607	0.917789
CG10486	0	0	0.11723	0	0.172021	0.169038	0.200128	0.418009	0	0	-1.08436	-1.05922	1.12201	0.292878	0.820186
CG10492	63.1514	60.0957	57.7943	69.0641	55.2189	51.8946	56.8365	57.4762	56.2873	56.633	0.126613	5.85315	2.47168	0.119537	0.655469
CG10494	6.24025	8.10114	4.92365	7.05336	7.2249	5.4092	8.40539	7.73317	6.1001	4.92461	0.0248229	3.01404	0.0157784	0.978111	1
CG10495	5.24181	4.5661	4.3375	3.23279	5.67671	5.24017	5.40347	4.5981	3.32733	7.07913	-0.138034	2.47323	0.329852	0.567225	1
CG10505	0.24961	0.883761	1.40676	0.881669	0.172021	1.52134	1.80116	2.29905	1.10911	1.53894	-1.08971	1.53812	8.45704	0.00461168	0.115415
CG10508	124.805	98.6866	108.32	103.449	115.426	104.634	117.876	111.19	110.911	112.958	-0.0182981	6.89505	0.0759586	0.783503	1
CG10510	0	0	0	0	0	0	0.200128	0	0	0	-1.45518	-1.23652	2.13044	0.200926	0.746845
CG10512	39.688	45.8083	50.6433	46.7285	40.425	41.9213	40.8262	42.2189	32.1642	43.7059	0.153699	5.52364	0.997002	0.320801	0.850105
CG10513	63.401	48.7541	54.1602	52.9002	58.1433	13.0159	22.4144	22.7815	18.3003	16.9284	1.56738	4.63784	100.621	3.42295e-16	1.97433e-13
CG10514	12.2309	9.57408	14.1848	12.3434	12.3855	4.90209	7.00449	6.06113	5.54554	6.46355	1.02082	2.9165	26.9842	1.33118e-06	0.000148444
CG10516	12.9797	15.9077	14.8882	13.8128	13.7617	13.0159	14.4092	21.3185	13.3093	12.3115	-0.0594795	3.85536	0.0766987	0.782478	1
CG10527	267.832	313.441	333.636	260.974	302.758	243.583	250.961	227.815	227.645	245.307	0.307965	7.74114	9.5999	0.00261899	0.0790545
CG10543	96.0999	90.8801	68.2278	85.8158	88.247	94.8301	95.2611	93.634	97.8789	84.9496	-0.12333	6.5047	1.46164	0.229938	0.786537
CG10550	167.488	169.682	174.086	166.636	188.363	181.715	168.508	176.4	172.189	184.981	-0.0283138	7.29341	0.118566	0.731425	1
CG10553	12.7301	23.7142	25.4389	20.5723	15.654	8.95899	7.40475	10.2412	8.31832	3.69346	1.32942	4.06222	31.092	2.71491e-07	3.8814e-05
CG10555	42.6833	46.1029	43.6095	39.3812	41.8012	46.4853	47.2303	44.0999	45.4735	31.0866	-0.00822091	5.34073	0.00686516	0.934156	1
CG10559	1.24805	2.3567	4.10304	1.17556	2.06426	2.7046	2.40154	2.92606	2.21822	2.15452	-0.108057	1.32977	0.14803	0.991493	1
CG10560	25.9594	36.8234	44.7818	44.3774	44.2095	24.8485	28.018	25.9166	23.5686	23.3919	0.641289	4.82432	13.8172	0.000355393	0.0170823
CG10561	64.8986	64.0727	56.8565	59.9535	59.5194	47.4996	51.6331	54.9682	56.8418	63.0966	0.158996	5.74887	3.2689	0.0740533	0.518286
CG10562	8.73635	11.9308	15.9433	10.2861	9.80522	9.80418	11.6074	10.6592	8.04104	11.0804	0.168088	3.6514	1.19899	0.27654	0.807515
CG10565	75.6319	80.4222	39.272	86.6975	73.1091	58.8251	59.6383	58.7303	70.7057	78.7938	0.117127	6.22722	0.642928	0.424833	0.962458
CG10566	30.702	34.9086	30.4798	49.3735	34.4043	31.9481	34.6222	29.8876	35.2142	35.7034	0.0965023	5.18292	0.552591	0.45926	0.980405
CG10570	0	0	0	0	0	0	0	0	0	0	0	-1.30545	0	1	1
CG10576	64.3994	73.9413	46.0713	77.5869	88.7631	66.4318	59.8384	76.0776	59.6146	70.4835	0.0735252	6.33279	0.252733	0.616425	1
CG10581	4.9922	5.74445	3.51689	7.64114	6.88086	4.73305	3.80244	3.13507	2.77277	5.2324	0.51997	2.43318	5.93755	0.016855	0.244911
CG10584	12.4805	15.0239	11.0196	9.11058	11.6975	14.0301	14.009	10.6592	17.1912	13.5427	-0.210842	3.79373	2.58753	0.111324	0.638807
CG10585	37.4415	30.4897	32.8243	31.7401	38.3608	29.0745	32.0205	30.9327	29.9459	30.471	0.163409	4.94229	3.10774	0.0814255	0.543932
CG10587	0	0	0	0	0	0	0	0	0	0	0	-1.30545	0	1	1
CG10588	0	0	0	0	0	0.169038	0.200128	0	0	0	-2.14391	-1.20137	4.19334	0.0705032	0.508074
CG10589	0	0	0	0	0.172021	0	0	0	0	0	1.26143	-1.25546	1.52651	0.280509	0.807515
CG10590	38.9392	38.5909	46.423	38.7935	38.5328	48.8519	38.0244	42.2189	39.6506	40.6281	-0.056233	5.34357	0.433795	0.511868	1
CG10591	0	0	0	0	0	0	0	0	0	0	0	-1.1336	0	1	1
CG10592	0	0	0	0	0	0	0	0	0	0	0	-0.567114	0	1	1
CG10597	0	0	0.11723	0	0	0	0	0	0	0	1.21981	-1.22699	1.51617	0.280509	0.807515
CG10598	0	0.294587	0	0	0	0	0	0	0	0	1.89824	-1.27041	2.8694	0.126964	0.655469
CG10600	80.8737	85.4302	67.7588	89.0486	79.99	69.6435	74.6479	73.7786	72.6466	78.486	0.124997	6.31957	1.98908	0.161996	0.732512
CG10602	59.4072	71.5846	71.393	63.7741	65.7122	72.8552	70.8455	69.5985	64.8829	65.5589	-0.0493522	5.93946	0.378282	0.540127	1
CG10616	26.7083	27.2493	26.2595	28.8012	32.34	31.272	30.8198	29.4696	29.3914	29.2399	-0.0897925	4.82261	0.859769	0.356364	0.89651
CG10621	13.9782	63.9254	29.5419	32.6218	47.4779	15.3824	17.211	34.4857	13.8639	18.1595	0.929428	5.50022	4.78126	0.0314498	0.346092
CG10623	36.1935	36.9707	26.6112	35.5607	28.2115	26.2008	29.619	27.1706	29.6687	33.8567	0.157333	4.96352	2.42566	0.122987	0.655469
CG10625	4.74259	2.94587	2.93075	3.52668	3.95649	4.0569	4.00257	3.97109	3.32733	2.15452	0.00109083	1.99888	1.05664e-05	0.997414	1
CG10628	13.7286	11.7835	8.79224	9.40447	12.2135	10.3113	9.20591	12.7493	13.032	13.8505	-0.073464	3.69959	0.197474	0.657869	1
CG10631	217.91	192.365	186.747	188.089	183.891	207.747	226.145	196.046	205.185	210.219	-0.109958	7.34753	1.22234	0.271945	0.807515
CG10635	22.7145	22.9778	13.9503	29.0951	27.1794	17.749	17.0109	18.8104	17.7457	21.2374	0.313369	4.40328	3.54439	0.0630825	0.495117
CG10638	69.6412	60.9795	74.6754	60.5413	70.8728	64.4033	65.6421	79.2127	76.5285	58.4798	-0.0306591	5.41327	0.0741757	0.785995	1
CG10639	44.6802	41.3895	40.2098	41.1446	43.5214	34.8218	36.6235	40.3379	34.9369	33.5489	0.223785	5.31354	4.45541	0.0376549	0.383823
CG10646	9.73479	11.047	9.61284	7.93503	15.1379	10.3113	12.2078	12.7493	13.3093	8.92586	-0.0943604	3.50013	0.400956	0.528254	1
CG10650	3.99376	2.06211	3.16521	12.6373	3.44043	2.87364	4.00257	5.01611	3.32733	3.38567	0.341489	2.11403	0.722872	0.397533	0.938646
CG10651	0	0	0.11723	0	0.172021	0.169038	0	0	0.277277	0	-0.280834	-0.80652	0.0683645	0.814027	1
CG10654	28.9548	26.3655	19.9291	26.1562	34.9204	22.9891	26.0167	26.3346	32.1642	30.7788	-0.0174569	4.77213	0.0209764	0.885178	1
CG10657	43.6818	57.0026	78.3095	41.4385	48.6821	62.713	52.0334	40.9649	51.8508	48.9383	0.0790599	5.56239	0.28906	0.592193	1
CG10659	0	0	0	0	0.172021	0	0	0	0	0	1.26123	-1.049	0.605357	0.443263	0.970632
CG10660	16.2247	17.3806	22.7426	18.5151	19.0944	17.918	18.2117	19.0194	17.4685	19.6984	0.0343864	4.17812	0.0798339	0.778192	1
CG10663	6.24025	7.80655	6.91656	4.11446	6.02075	4.0569	4.00257	3.97109	4.43644	5.84798	0.518794	2.47793	4.32025	0.0406011	0.397853
CG10669	27.4571	24.3034	19.5774	21.7478	24.5991	22.9891	22.6145	22.5725	20.7958	18.4673	0.121604	4.45886	1.18851	0.340314	0.876973
CG10671	30.9517	38.2963	32.4727	27.6256	35.9525	29.9197	26.417	25.0805	27.4504	30.1632	0.257316	4.96172	7.00799	0.00962917	0.182409
CG10672	37.6911	45.9556	33.176	43.2018	46.7898	34.9908	36.2232	37.2028	34.6597	48.6305	0.11308	5.34835	0.996231	0.320987	0.850105
CG10674	13.4789	11.9308	12.778	14.4006	13.5897	12.5088	13.6087	14.2123	11.9229	11.0804	0.0507157	3.7177	0.13446	0.82868	1
CG10680	128.05	89.4071	66.9382	72.2969	74.8293	58.6561	40.4259	220.709	42.978	37.858	0.0943483	6.96691	0.0627714	0.802758	1
CG10681	7.4883	8.54302	6.33041	10.8739	9.46118	6.25439	8.60552	7.94217	7.76376	9.54144	0.083679	3.07187	0.18094	0.671615	1
CG10688	9.9844	11.047	13.247	12.3434	13.7617	16.2276	12.6081	16.9294	14.1411	14.7738	-0.302259	3.81924	4.08407	0.0463578	0.426997
CG10694	0	0	0.351689	0	0	0.338075	0	0	0	0	0.15044	-1.1271	0.0211623	0.884773	1
CG10700	0	0	0.11723	0	0	0	0	0	0	0	1.21998	-1.19658	1.63288	0.280509	0.807515
CG10702	45.9283	45.2191	45.0162	44.9651	55.907	32.4552	39.6254	40.1289	37.7097	39.7047	0.324819	5.29193	10.6315	0.00158708	0.0542886
CG10710	6.73947	8.10114	5.5098	5.8778	7.05288	5.74728	6.80437	7.10615	6.93193	7.38692	-0.0191654	2.62807	0.00856802	0.957862	1
CG10713	30.702	24.0088	28.6041	26.1562	27.6955	29.4125	33.4214	26.3346	30.2232	39.0891	-0.20423	4.74892	3.5856	0.0615993	0.489255
CG10721	19.9688	13.9929	15.9433	16.1639	21.6747	14.8753	16.6107	15.6753	18.5776	16.9284	0.0866313	4.28273	0.459436	0.499683	1
CG10725	0.49922	0	0	0	0	0.169038	0	0	0	0	0.548306	-1.13901	0.137781	0.712312	1
CG10730	0.49922	0	0.586149	0.58778	0.516064	0.169038	0.200128	0.209004	0.554554	0	0.857327	-0.481186	1.28343	0.260368	0.807515
CG10731	4.74259	7.51197	6.91656	7.93503	9.97724	8.11381	7.20462	6.27013	7.48649	6.15577	0.0740039	3.37365	0.21002	0.647892	1
CG10732	114.321	141.696	86.1639	116.968	120.243	96.5205	96.8622	92.171	114.238	140.351	0.104234	6.58014	0.962212	0.329345	0.860837
CG10734	0	0.294587	0.11723	0	0.172021	0.169038	0.200128	0	0	0	0.527006	-1.01926	0.257684	0.613127	1
CG10737	358.19	395.63	364.819	325.042	334.926	327.764	327.61	302.22	333.842	351.802	0.114955	8.2595	2.02025	0.158781	0.724673
CG10738	8.73635	7.95385	11.1368	9.40447	7.91299	7.60669	10.6068	9.4052	9.98198	8.31028	-0.0180505	3.31074	0.0105995	0.95749	1
CG1074	13.9782	16.3496	14.8882	18.8089	13.9337	18.4251	20.8134	20.9004	19.4094	20.314	-0.362368	4.17683	8.82435	0.00383979	0.10195
CG10747	31.9501	30.9316	32.2382	30.5645	26.6633	29.0745	29.2188	22.9905	25.7868	26.7776	0.184562	4.95873	3.32896	0.0714954	0.511371
CG10748	0	0	0	0	0	0	0	0	0	0	0	-1.29811	0	1	1
CG10749	0	0	0	0	0	0	0	0	0	0	0	-1.29809	0	1	1
CG10750	0	0	0	0	0	0	0	0	0	0	0	-1.24678	0	1	1
CG10752	0.24961	0.44188	0	0.29389	0	0	0	0	0	0	3.03219	-0.90431	5.79881	0.0191716	0.265027
CG10754	17.7223	13.551	15.2399	12.6373	15.1379	12.3397	12.0077	13.7943	15.2502	14.466	0.138647	3.9491	1.31085	0.255374	0.807515
CG10761	0	0	0	0	0	0	0	0	0	0	0	-1.2705	0	1	1
CG10764	0.74883	0.294587	0.11723	0	0	0.845188	0.800514	0.209004	0.277277	0	-1.01582	-0.560838	1.29834	0.257638	0.807515
CG1077	0.24961	0.147293	0.11723	0.58778	0.344043	0.507113	0.600385	0.209004	0.831832	0.615577	-0.996648	-0.519662	1.4413	0.233181	0.791641
CG10777	146.272	141.844	156.033	141.655	128.672	187.125	182.917	167.413	189.38	134.196	-0.27006	7.35355	6.25022	0.0142897	0.224858
CG10778	12.7301	9.72137	12.778	13.5189	10.3213	25.1866	21.0135	23.4085	24.4004	18.7751	-0.94601	4.35681	66.2065	2.5775e-12	8.4537e-10
CG10793	0	0.294587	0.11723	0	0	0.169038	0.200128	0	0.554554	0	-0.692529	-0.814787	0.419088	0.519365	1
CG10795	13.2293	12.2254	15.3571	17.6334	13.7617	12.1707	15.61	11.2862	16.6366	11.696	0.0944304	3.86211	0.491371	0.485183	0.999096
CG10799	72.6365	30.4897	11.0196	23.2173	45.2416	9.80418	10.4067	77.1227	16.6366	16.9284	0.452978	5.33231	1.16521	0.283366	0.809526
CG10801	0.24961	0.147293	0.11723	0	0	0.169038	0	0	0	0.615577	-0.318887	-1.17312	0.0969211	0.773269	1
CG10802	27.7067	29.9006	27.4318	29.9768	33.8882	26.7079	26.8172	26.7526	26.0641	28.6243	0.142723	4.93304	2.28279	0.134432	0.672846
CG10803	40.6864	34.7613	35.4034	27.9195	25.1151	39.8929	41.4266	35.7398	40.2052	33.2411	-0.218182	5.38595	3.62492	0.0602192	0.489255
CG10804	104.587	88.0815	135.635	105.8	94.0957	109.367	109.67	99.4861	111.465	86.1807	0.033099	6.64613	0.131505	0.717754	1
CG10809	21.2169	18.4117	16.5294	18.5151	16.342	16.2276	14.4092	17.7654	15.5275	17.5439	0.154601	4.15883	1.60731	0.208245	0.756735
CG10814	1.24805	0	0.11723	0	0.688086	0.338075	0	0.209004	0	0.307788	0.984645	0.238209	0.595202	0.442711	0.970073
CG10822	0	0	0	0	0	0	0	0	0	0	0	-1.29814	0	1	1
CG10824	12.2309	14.5821	14.771	12.9312	12.0415	13.692	11.8076	11.2862	13.032	13.8505	0.0745487	3.95397	0.130188	0.71911	1
CG10827	0.74883	0.147293	0	0	0.344043	0	0.200128	0	0.554554	0	0.617822	-0.389113	0.399215	0.529315	1
CG10830	241.123	225.654	292.488	217.772	226.036	290.407	304.195	256.449	290.309	242.845	-0.201744	7.93137	4.7419	0.0321376	0.350206
CG10834	0	0	0	0	0	0	0	0	0	0	0	-1.25523	0	1	1
CG10839	0	0	0	0	0	0	0	0	0	0	0	-1.29797	0	1	1
CG10841	0	0.294587	0	0.29389	0	0	0.200128	0	0	0.307788	0.198275	-1.03977	0.0350494	0.851948	1
CG10845	0	0	0	0	0	0.169038	0	0	0	0	-1.4369	-1.29087	2.14118	0.200926	0.746845
CG10853	0	0	0	0	0	0	0	0	0	0	0	-1.27038	0	1	1
CG10859	0	0.44188	0.11723	0	0	0.169038	0	0.209004	0.277277	0	0.0149227	-1.16224	0.000553088	0.981316	1
CG10862	0	0	0	0.29389	0.172021	0	0	0	0	0	1.96751	-1.22587	2.4617	0.126964	0.655469
CG10863	143.027	184.411	159.55	185.151	197.309	194.393	199.728	208.168	166.366	163.743	-0.101988	7.43044	1.06228	0.305547	0.832526
CG10864	2.4961	3.68234	4.10304	2.35112	2.23628	3.54979	3.20205	3.13507	2.4955	3.07788	-0.0295109	1.66144	0.0143842	0.936187	1
CG10866	20.2184	16.9387	23.446	13.8128	13.7617	19.9464	21.4137	16.7204	19.6867	14.7738	-0.0643926	4.27847	0.231486	0.694736	1
CG10869	0.24961	1.47293	0.703379	0.58778	1.20415	0.845188	1.4009	1.25403	0.831832	0.307788	-0.110179	0.639035	0.0517053	0.820654	1
CG10874	21.4665	26.5128	16.9983	23.5112	24.255	25.8628	27.0173	22.3635	23.2913	23.3919	-0.119716	4.74364	1.39543	0.240702	0.806639
CG10877	3.24493	2.50399	2.57906	3.52668	2.92436	4.56402	5.40347	2.71706	4.15916	2.77009	-0.446384	1.88279	2.89965	0.0921621	0.580828
CG10880	6.73947	7.07009	5.86149	3.52668	6.53682	4.0569	7.60488	3.76208	4.15916	6.46355	0.218071	2.7144	1.05016	0.308305	0.836363
CG10881	0	0.147293	0	0	0	0	0	0	0	0	1.24584	-1.24817	1.48622	0.280509	0.807515
CG10887	0	0	0	0	0	0	0	0	0	0	0	-1.22075	0	1	1
CG10889	3.49454	4.86068	4.3375	5.29002	3.44043	4.56402	3.60231	5.43412	4.43644	3.38567	-0.0133873	2.30129	0.00342954	0.953435	1
CG10898	17.9719	22.094	19.1085	20.2784	22.8789	21.1297	18.4118	18.8104	22.7367	15.3894	0.084036	4.3067	0.604205	0.439082	0.967768
CG10899	0	0	0.23446	0	0	0	0	0	0	0	1.85141	-1.19973	2.6563	0.126964	0.655469
CG1090	347.956	305.929	456.493	288.6	299.833	311.874	334.415	309.536	323.86	245.615	0.155923	8.09805	2.43316	0.122417	0.655469
CG10903	9.48518	9.57408	9.96453	7.05336	11.6975	7.94477	7.60488	7.31516	8.59559	8.61807	0.272657	3.18555	2.76763	0.0997798	0.603707
CG10904	9.48518	7.95385	8.44055	8.5228	10.6653	9.97322	9.20591	10.6592	9.98198	8.00249	-0.0939987	3.38632	0.370666	0.544225	1
CG10907	8.98596	8.39573	7.8544	7.93503	8.42905	7.94477	8.00514	7.31516	10.5365	9.23365	-0.0389275	3.32963	0.0428716	0.847928	1
CG10909	0	0	0	0	0	0	0.200128	0	0	0	-1.45514	-1.27631	2.16568	0.200926	0.746845
CG1091	44.181	38.0017	40.796	42.9079	42.1453	43.4427	41.2265	43.4729	39.0961	41.2436	-0.00715171	5.39716	0.00773149	0.930135	1
CG10910	0	0	0	0	0	0	0	0	0	0.307788	-1.48552	-0.303139	0.587862	0.446515	0.972401
CG10911	0	0.147293	0.11723	0	0.516064	0	0	0	0	0.307788	1.51009	1.63504	0.29046	0.59182	1
CG10912	0	0	0	0	0	0	0.200128	0	0	0	-1.4572	0.0356266	0.647774	0.42359	0.962458
CG10914	9.23557	7.65926	8.44055	5.8778	7.91299	5.74728	8.60552	8.98719	7.76376	7.69471	0.025664	3.03025	0.0251144	0.874449	1
CG10915	90.3589	84.841	87.9224	84.0525	82.7423	93.8159	89.2573	84.4378	80.965	96.3377	-0.0492097	6.46061	0.389985	0.533939	1
CG10916	22.7145	15.1712	17.5845	23.5112	17.5462	17.0728	23.2149	18.3924	15.8048	18.4673	0.035279	4.06629	0.0840562	0.816021	1
CG10918	0	0.147293	1.1723	0	0.172021	0.507113	1.00064	1.04502	0.831832	0.615577	-1.05816	-0.246781	2.46627	0.119937	0.655469
CG10919	0	0.589174	0.468919	0	0.344043	0.169038	0	0.209004	0	0.307788	1.14106	-0.87661	1.598	0.209718	0.756735
CG1092	16.4743	19.4427	20.6324	14.6945	17.2021	18.9322	17.6113	24.6625	19.964	9.54144	-0.0363671	4.15709	0.0420026	0.838093	1
CG10920	0.24961	0.147293	0	0	0	0	0	0	0	0	1.94228	-1.27055	2.79493	0.126964	0.655469
CG10924	15.4758	16.4969	9.8473	10.2861	15.998	15.0443	10.4067	22.7815	11.3684	11.696	-0.0762754	4.60565	0.086709	0.769103	1
CG10927	2.4961	2.06211	1.28953	1.46945	2.75234	1.52134	4.00257	2.29905	1.38639	1.53894	-0.127615	1.4439	0.125095	0.724427	1
CG10931	0	0	0	0	0	0	0	0	0	0	0	-1.22248	0	1	1
CG10932	16.4743	20.9157	20.5152	22.9234	15.654	21.4678	16.2104	23.6175	17.4685	18.7751	-0.0214476	4.52872	0.0161923	0.899036	1
CG10933	3.24493	2.65128	3.39966	1.76334	3.78447	3.88787	4.60295	3.34407	4.15916	3.07788	-0.340692	1.86578	1.76723	0.187194	0.746845
CG10934	0.24961	0	0	0.29389	0.172021	0.169038	0.200128	0.209004	0	0	-0.170834	-0.992387	0.0362904	0.849431	1
CG10936	6.73947	8.9849	9.37839	10.58	8.94512	9.29707	6.80437	10.6592	13.5866	5.84798	-0.0489026	3.6398	0.0409158	0.840172	1
CG10943	0.49922	0.147293	0	0	0	0	0	0	0	0	2.42344	-0.918926	3.2441	0.0761694	0.525321
CG10947	61.4041	74.6778	58.6149	48.7857	60.8956	90.0971	75.4484	63.1194	65.4374	69.2524	-0.254063	5.89156	4.01976	0.0480726	0.436305
CG10948	87.3635	89.1126	71.2757	90.2242	95.816	78.2644	97.2624	90.0809	85.9559	102.801	-0.0670109	6.39119	0.565231	0.454185	0.9765
CG10949	9.48518	13.551	7.26825	12.6373	15.3099	9.12803	11.2072	10.2412	13.5866	13.8505	0.0155929	3.62542	0.00735663	0.931845	1
CG10950	0	0.147293	0.23446	0	0	0.169038	0	0	0	0	0.862377	-1.07618	0.571824	0.452179	0.975285
CG10953	0	1.17835	0	0	0.688086	0	0	0.209004	0.277277	0.307788	1.40483	-1.12979	2.12369	0.151661	0.706697
CG10958	10.9828	12.0781	7.61994	10.58	11.1814	7.43766	9.80629	9.82321	10.8138	11.3882	0.0960194	3.46654	0.336201	0.563526	1
CG10959	3.99376	4.27151	2.81352	7.05336	4.64458	4.73305	5.40347	3.55308	4.99099	4.00125	-0.0403344	2.2222	0.025151	0.874358	1
CG10960	185.211	167.031	229.653	201.902	192.836	188.139	199.528	200.226	189.658	176.978	0.0329428	7.48649	0.105186	0.746469	1
CG10962	0.99844	3.53504	0.820609	0.881669	4.30054	0.507113	0.800514	4.38909	1.94094	0	0.484453	1.60197	0.981365	0.324604	0.854794
CG10969	0	0	0.23446	0	0	0	0	0	0	0	1.85067	-1.27012	2.8612	0.126964	0.655469
CG10970	0.74883	0.294587	0.820609	0.58778	0.516064	0.338075	0.800514	0.418009	0	0.615577	0.40651	-0.434121	0.378268	0.540134	1
CG10973	16.9735	17.9698	20.2808	17.6334	18.7503	14.7063	17.0109	18.3924	19.1321	16.6206	0.102392	4.05957	0.608544	0.43745	0.966791
CG10979	36.4431	34.1721	31.6521	34.9729	33.8882	59.1632	64.4414	51.2061	57.3964	53.8629	-0.745397	5.66595	90.2192	4.20653e-15	2.06949e-12
CG10984	51.6693	68.7861	51.1122	69.0641	68.6366	54.5992	55.6357	64.1644	61.2783	65.8667	0.037538	5.93901	0.114228	0.736194	1
CG10993	0	0.147293	0.11723	0	0	0.169038	0	0.209004	0	0	-0.272913	-1.14461	0.0720038	0.814027	1
CG10996	0	0	0	0	0	0	0	0	0	0	0	-1.18168	0	1	1
CG11000	222.652	214.165	253.099	205.135	222.768	247.64	263.769	232.413	234.577	205.603	-0.0829168	7.70337	0.815194	0.369077	0.911096
CG11007	21.9657	19.2954	18.6395	17.6334	11.8695	17.918	16.0103	18.3924	20.2412	20.6218	-0.057354	4.07638	0.160702	0.689492	1
CG11018	0	0	0	0	0	0	0	0	0	0	0	-1.30545	0	1	1
CG11023	0.49922	0.147293	0.23446	0	0.172021	0	0.400257	0.209004	0	0.307788	0.206691	-0.982514	0.050183	0.823468	1
CG11029	0.49922	0.736467	1.40676	0.881669	0.688086	0.676151	1.00064	1.67204	1.66366	0.615577	-0.353847	0.193556	0.377321	0.540641	1
CG1103	9.48518	10.3105	18.2879	11.1678	8.94512	11.3255	15.61	11.4952	14.6957	15.3894	-0.204579	3.66931	1.2624	0.307612	0.834974
CG11030	29.2044	28.7222	25.0872	25.2745	26.8353	30.2577	31.22	28.0066	37.1551	35.0879	-0.254044	5.29467	4.30579	0.0409305	0.399563
CG11034	4.49298	4.12422	5.04088	4.70224	5.50469	4.0569	3.60231	6.89715	4.15916	3.69346	0.085884	2.48689	0.0588353	0.808916	1
CG11035	11.9813	18.1171	9.14393	15.2823	20.9866	12.8469	13.2085	10.8682	16.3594	19.6984	0.0647216	3.93979	0.170633	0.680564	1
CG11037	0	0	0	0	0	0	0	0	0	0	0	-1.29789	0	1	1
CG1104	48.1747	44.9245	36.4585	47.904	49.3702	44.1188	41.8268	49.7431	40.7598	60.3265	-0.0625932	5.56914	0.302975	0.583431	1
CG11041	0.24961	0.883761	0	0.29389	0.344043	0.338075	0.600385	0	0.831832	0.615577	-0.328753	0.775977	0.238426	0.626571	1
CG11043	0.24961	1.03105	0.586149	0.881669	1.20415	0.676151	0.400257	1.04502	0.554554	0.615577	0.264654	-0.236393	0.181126	0.671456	1
CG11044	23.2137	27.102	21.1014	19.6906	18.2343	15.8895	17.6113	18.1834	18.3003	30.1632	0.146757	4.44404	0.73776	0.392735	0.934065
CG1105	44.9298	45.5137	58.2632	42.0262	49.5422	48.5138	57.8371	48.489	47.969	51.4006	-0.0756939	5.52951	0.625448	0.529407	1
CG11050	216.911	209.599	167.404	224.238	208.662	309.508	281.781	243.281	261.75	275.47	-0.419624	7.80562	21.7289	1.12191e-05	0.000982526
CG11052	23.9626	25.1872	31.5348	21.454	24.083	27.7222	26.2168	22.3635	27.4504	25.5464	-0.0256731	3.9357	0.0249565	0.874841	1
CG11060	0.24961	0.147293	0.11723	0	0.344043	0	0.200128	0.627013	0	0.307788	-0.310348	-0.778603	0.112682	0.737918	1
CG11068	0	0.589174	0.11723	0	0.516064	0.169038	0.400257	0.418009	0.277277	0.307788	-0.180808	-0.660841	0.0496537	0.84401	1
CG11069	9.9844	11.7835	13.7159	11.7556	9.46118	11.8326	10.2065	10.8682	9.98198	10.4648	0.0909736	3.21854	0.348084	0.556726	1
CG11070	55.6631	59.0647	53.2223	56.133	59.1754	56.4586	51.8333	52.2511	49.9099	47.7072	0.131268	5.78004	3.44981	0.0666357	0.508074
CG11073	190.702	243.771	211.014	265.676	241.174	203.859	196.526	193.12	180.507	204.679	0.235032	7.57056	5.97227	0.0165476	0.243246
CG11076	54.1654	57.739	52.7534	68.1824	62.7878	61.5297	63.4407	62.0743	61.001	62.7888	-0.075587	6.03904	0.839252	0.362138	0.903563
CG11077	32.4493	31.8154	46.423	29.6829	35.6084	31.61	26.417	34.9038	34.1051	20.9296	0.254415	5.00976	3.78791	0.0548451	0.465919
CG11085	5.74103	3.82963	4.22027	3.52668	4.47256	4.0569	3.40218	3.34407	4.99099	4.61682	0.10435	2.20716	0.198244	0.657246	1
CG11089	206.677	83.6627	59.9044	107.858	82.2263	41.5833	38.4247	96.1421	33.8278	39.7047	1.09633	6.63662	7.49052	0.00751641	0.160162
CG1109	31.9501	32.5519	30.4798	29.9768	28.2115	26.7079	32.2207	34.6947	28.8368	30.7788	-0.000114329	4.91145	1.11121e-06	0.999161	1
CG11095	11.2325	11.3416	13.0125	9.99225	12.2135	12.1707	10.8069	11.4952	17.4685	13.5427	-0.157497	3.71223	1.07672	0.347508	0.88592
CG11099	219.657	191.629	219.337	197.2	194.384	178.842	183.118	169.503	170.248	182.826	0.208721	7.37259	8.25472	0.00510412	0.123555
CG11103	13.4789	11.7835	11.4885	11.7556	9.6332	8.95899	13.6087	10.0322	9.42743	14.466	0.0448103	3.49898	0.0923527	0.761931	1
CG11106	0	0	0	0	0	0	0	0	0	0	0	-1.30545	0	1	1
CG11107	64.3994	54.6459	64.3592	67.3008	64.164	61.0226	59.0379	56.8492	56.2873	64.9433	0.0774444	5.84323	1.1684	0.282711	0.80919
CG11109	11.2325	7.51197	14.6537	10.2861	10.4933	11.3255	11.0071	12.5403	12.2002	12.3115	-0.121023	3.68931	0.762305	0.470234	0.990023
CG11110	6.73947	10.4578	8.67501	10.8739	9.6332	9.63515	10.2065	8.98719	10.8138	7.69471	-0.0331107	3.31522	0.0474571	0.828058	1
CG11112	0	0	0	0	0	0	0	0	0	0	0	-1.27047	0	1	1
CG11113	0	0	0	0	0	0	0	0	0	0	0	-1.29816	0	1	1
CG11122	152.262	141.107	105.507	131.663	127.124	113.762	129.683	114.952	125.607	123.731	0.112562	6.83584	0.641055	0.425506	0.962458
CG11123	12.4805	15.3185	12.0747	15.2823	18.2343	12.3397	12.408	15.4663	12.7548	21.853	-0.0133581	3.96146	0.00954247	0.936711	1
CG11125	5.74103	6.48091	3.86858	6.17169	5.84873	4.90209	6.20398	3.34407	5.54554	5.54019	0.128807	2.80898	0.288867	0.592317	1
CG11127	22.4649	17.5279	17.5845	21.1601	23.739	18.7632	16.0103	18.6014	16.0821	16.9284	0.235211	4.27053	3.78495	0.0549378	0.466232
CG1113	3.24493	3.97692	2.3446	4.11446	4.98862	4.56402	3.80244	6.27013	5.82282	5.84798	-0.495224	2.36141	4.31796	0.040653	0.398129
CG11131	0	0.147293	0	0	0	0	0	0	0.277277	0	-0.237646	-1.05894	0.0310546	0.867893	1
CG11134	6.98908	10.7524	5.86149	7.05336	10.1493	4.73305	5.00321	9.61421	5.26827	7.38692	0.366179	3.26588	2.33458	0.130149	0.663042
CG11137	63.1514	59.8012	85.3433	63.7741	64.336	67.7841	64.2412	68.9715	64.051	68.0212	0.0178728	5.98195	0.0250526	0.874602	1
CG11138	110.827	97.0664	89.2119	83.7586	95.2999	87.2234	104.067	107.428	109.525	92.3365	-0.0718704	6.67524	0.62139	0.43267	0.962786
CG11141	35.9439	30.3425	25.3216	28.2134	30.6198	28.0602	28.2181	22.1545	23.2913	25.5464	0.233587	4.77348	4.7546	0.031914	0.348529
CG11145	0	0.147293	0	0	0	0	0	0	0	0	1.2458	-1.27208	1.61523	0.280509	0.807515
CG11147	86.3651	113.269	140.09	103.155	105.793	116.129	104.667	99.9041	88.7287	92.6443	0.129665	6.67314	1.40498	0.239113	0.803787
CG11148	358.939	356.008	375.722	335.916	342.323	395.041	397.655	381.015	390.406	394.585	-0.146746	8.44178	6.81646	0.0106322	0.19289
CG11149	0	0	0	0	0	0	0	0	0	0	0	-1.0655	0	1	1
CG11151	57.1607	73.794	60.8423	69.6519	65.3682	58.318	55.0353	49.5341	61.5555	60.0187	0.202152	6.06074	4.25802	0.0420395	0.403039
CG11155	524.93	479.735	880.982	412.034	431.946	750.696	729.468	622.206	670.456	575.564	-0.293756	9.20832	3.37859	0.0694544	0.508074
CG11158	9.73479	12.3727	9.96453	12.0495	8.94512	11.4946	11.4073	13.1673	8.31832	14.466	-0.151297	3.34803	0.742705	0.39116	0.933106
CG11159	0.74883	0	0.23446	0.29389	0.688086	0.507113	0.200128	0.627013	0	0.923365	-0.259149	-0.525429	0.110789	0.740047	1
CG1116	35.195	22.9778	39.5064	31.7401	36.4685	30.5958	31.6203	28.0066	24.955	36.0112	0.136071	4.94012	1.81281	0.181662	0.746845
CG11160	10.234	10.016	7.61994	7.34725	8.42905	6.42343	6.80437	9.1962	6.37738	8.92586	0.216827	3.23964	0.773911	0.381429	0.923741
CG11162	0	0.294587	0	0	0	0	0	0	0	0	1.89836	-1.23464	1.91336	0.17785	0.746845
CG11164	1.24805	0.883761	0.351689	0.881669	1.03213	1.01423	0.400257	0.627013	2.21822	1.23115	-0.313614	0.679388	0.214584	0.644352	1
CG11165	0	0	0	0	0	0	0	0	0	0	0	-1.29804	0	1	1
CG11168	25.4602	29.4587	25.6733	29.6829	23.911	26.877	30.6196	26.1256	26.0641	30.471	-0.0639255	4.80266	0.482026	0.489352	1
CG11170	4.49298	4.27151	6.56487	3.23279	5.67671	4.73305	5.20334	5.01611	5.82282	4.92461	-0.0484445	2.29598	0.0500448	0.935996	1
CG11178	20.468	17.8225	20.1635	18.5151	25.9752	21.9749	23.6152	19.4374	18.3003	24.9308	-0.0695694	4.46084	0.328265	0.568158	1
CG11180	5.74103	6.62821	3.63412	7.34725	8.77309	6.25439	7.00449	6.27013	6.93193	6.46355	-0.0548208	3.25645	0.0635432	0.801574	1
CG11190	34.4462	31.0789	32.4727	37.0301	38.3608	34.1456	32.8211	37.6208	37.1551	36.6268	-0.0424013	5.15463	0.279451	0.598404	1
CG11191	31.4509	37.7071	23.7977	42.0262	38.5328	26.877	27.4176	28.8426	29.9459	48.6305	0.106284	5.03348	0.52674	0.469925	0.989978
CG11192	0	0	0	0	0	0	0	0	0	0	0	-1.26967	0	1	1
CG11200	25.2106	26.2182	32.9416	26.1562	27.5234	27.5531	31.22	23.6175	21.9049	33.2411	0.0129065	4.73509	0.0111497	0.916149	1
CG11208	31.7005	29.9006	33.5277	30.2707	34.0602	31.7791	30.6196	28.4246	25.2322	32.3178	0.104538	4.95774	0.821515	0.367236	0.908414
CG11210	105.835	94.5624	128.367	81.9953	86.1827	74.5456	75.4484	70.6435	67.3784	59.7109	0.515479	6.08668	27.4578	1.10464e-06	0.000124846
CG11211	96.8487	147.883	201.635	76.9991	118.695	263.361	205.132	73.5696	307.778	62.7888	-0.50048	7.53658	3.9647	0.0495952	0.442915
CG11221	25.2106	23.567	27.3145	19.6906	22.7068	32.6243	29.619	26.5436	24.6777	22.7763	-0.202249	4.6826	3.03123	0.0852043	0.557399
CG11226	0	0.147293	0.11723	0.29389	0	0.338075	0.200128	0	0	0.615577	-0.923343	-0.652961	0.856734	0.35721	0.897885
CG11227	0	0	0	0	0	0	0	0	0	0	0	-1.25466	0	1	1
CG11231	0	0	0	0	0	0	0	0	0	0	0	-1.18828	0	1	1
CG11236	3.49454	9.57408	4.10304	5.8778	7.05288	4.56402	4.00257	17.9744	2.77277	3.07788	-0.124871	3.56198	0.0851825	0.771087	1
CG1124	134.54	128.44	239.032	105.213	123.511	195.238	142.291	118.715	153.889	147.431	-0.0472894	7.18308	0.0922665	0.762039	1
CG11241	24.4618	21.3576	21.4531	24.9806	23.0509	24.3414	24.6158	32.8137	27.7277	28.0087	-0.25808	4.75234	4.66405	0.0335461	0.359235
CG11247	71.1389	77.6237	73.3859	83.1708	84.2905	78.6025	69.2444	81.9298	82.6286	96.3377	-0.0670483	6.35644	0.951367	0.33207	0.864789
CG11248	37.1919	38.149	30.4798	41.1446	38.5328	34.8218	42.027	39.2928	42.7007	48.6305	-0.161515	5.34136	2.10407	0.150497	0.704157
CG11249	0	0.147293	0.23446	0	0.172021	0.169038	0	0	0	0	1.21464	-0.852113	1.26592	0.263622	0.807515
CG11251	0	0	0	0	0	0	0	0	0	0	0	-1.27043	0	1	1
CG11257	4.9922	6.62821	7.97163	8.22891	5.16064	5.57824	5.80372	5.01611	8.04104	10.157	-0.0344064	2.90357	0.0277144	0.868168	1
CG1126	0.49922	1.32564	0.468919	0.881669	0.860107	1.69038	0.200128	0.836018	1.10911	0.923365	-0.241731	0.674592	0.314998	0.576069	1
CG11261	5.49142	3.38775	5.74426	3.23279	5.16064	5.57824	4.2027	4.8071	3.32733	4.00125	0.0660305	2.27929	0.0643811	0.800298	1
CG11262	0	0	0	0	0	0	0.200128	0	0	0	-1.45515	-1.26261	2.02596	0.200926	0.746845
CG11263	0.24961	0.44188	1.05507	0	0.860107	1.52134	0.600385	0.418009	0.554554	0.307788	-0.287866	0.312357	0.22236	0.638426	1
CG11266	322.247	273.229	283.696	292.126	293.125	309.001	282.381	310.999	300.291	321.639	-0.058083	8.19618	1.08717	0.299982	0.828443
CG11267	46.6771	55.8242	66.9382	52.0185	68.6366	64.2343	53.6344	63.5374	54.6236	52.9396	0.00893523	5.7783	0.00625863	0.937125	1
CG11269	0	0	0.11723	0	0	0	0	0.209004	0	0	-0.239576	-1.20639	0.034415	0.867893	1
CG11275	55.4134	55.8242	48.8848	45.8468	50.2303	42.0904	41.2265	37.6208	42.4234	42.7826	0.315486	5.42651	11.6734	0.000965164	0.0366916
CG11279	12.2309	7.80655	11.723	9.40447	10.4933	9.46611	13.2085	12.7493	11.3684	10.4648	-0.149835	3.80888	0.925477	0.338702	0.874563
CG11284	38.9392	39.9165	39.9754	33.5034	40.425	42.9356	41.6267	49.5341	42.978	33.2411	-0.12568	5.44402	1.59584	0.209863	0.756735
CG11286	0	0	0	0	0	0	0	0	0	0	0	-1.27728	0	1	1
CG11289	0.49922	0	0	0	0.344043	0.169038	0	0.209004	0	0	0.634044	-1.1019	0.337556	0.589205	1
CG1129	25.4602	23.567	25.7906	23.8051	23.2229	25.1866	27.6177	27.3796	31.055	24.3153	-0.152317	4.62812	2.50579	0.11705	0.653938
CG11291	0	0	0	0	0	0	0.200128	0	0	0	-1.45536	-1.06033	1.8124	0.200926	0.746845
CG11294	7.73791	3.97692	4.57196	9.40447	6.02075	6.76151	7.80501	5.43412	5.54554	6.46355	-0.0727561	2.80185	0.131309	0.717956	1
CG11298	0	0	0	0	0	0	0	0	0	0	0	-1.30545	0	1	1
CG11300	0	0	0	0	0	0	0	0	0	0	0	-1.19243	0	1	1
CG11306	85.3667	82.4843	100.231	88.1669	88.419	90.6042	90.0578	89.4539	82.6286	85.5651	0.0209834	6.46993	0.0763872	0.782909	1
CG11307	10.9828	11.4889	14.5365	12.3434	10.6653	13.1849	11.8076	14.6303	9.98198	15.0816	-0.10114	3.74506	0.539735	0.493451	1
CG11309	34.6958	50.2271	38.5686	32.6218	45.9297	41.0761	44.0283	58.5213	38.2643	36.0112	-0.105284	5.61505	0.530904	0.46818	0.988516
CG11313	0	0	0	0	0	0	0	0.418009	0	0	-2.17149	2.22878	2.16951	0.145736	0.695383
CG11317	57.6599	61.1268	47.1264	69.358	68.6366	49.8661	58.4375	63.7464	62.6647	76.6393	-0.0340909	6.09997	0.126658	0.722782	1
CG11318	0.99844	1.32564	0.468919	0.881669	0.688086	1.01423	0.400257	1.25403	0.277277	3.07788	-0.415616	0.124643	0.620642	0.432946	0.963144
CG11319	297.535	266.748	327.423	245.104	239.626	310.86	323.808	278.603	329.405	256.695	-0.12307	8.07234	1.35411	0.247735	0.807515
CG11320	0.24961	0.589174	0.23446	0	0	0.845188	0.600385	0	0.277277	0	-0.626447	-0.358179	0.531575	0.4679	0.988077
CG11321	211.669	258.058	150.523	192.792	177.354	235.977	209.134	176.191	201.026	242.229	-0.104333	7.46038	0.820623	0.367495	0.908778
CG11322	0.49922	0.736467	0.703379	0.58778	0.172021	0.676151	0.400257	0.418009	0.831832	0	0.18526	-0.463695	0.0655668	0.798508	1
CG11327	0	0.147293	0.11723	0.58778	0.172021	0.338075	0.200128	0.209004	0	0	0.0783472	-0.96472	0.00595285	0.985301	1
CG11329	0.24961	0.44188	0.586149	0	0	0.169038	0.400257	0.418009	0.277277	0	0.1565	0.0700426	0.0369255	0.848064	1
CG11333	0	0	0	0	0	0	0	0	0	0	0	-1.27627	0	1	1
CG11334	24.2122	25.3345	16.6466	17.6334	27.0074	24.1724	23.8153	24.6625	22.4595	31.0866	-0.180994	4.52922	1.60817	0.208126	0.756735
CG11337	14.727	13.2564	11.2541	8.22891	12.2135	12.1707	10.8069	13.3763	11.0911	12.0037	0.0109293	3.69004	0.00798909	0.928984	1
CG11340	0	0.147293	0.11723	0.29389	0	0	0	0	0	0	2.37135	-0.902667	2.87929	0.0936536	0.584749
CG11342	1.24805	1.91482	3.75135	1.46945	1.72021	2.53556	2.00128	2.50805	2.21822	4.30904	-0.323196	1.46224	0.991337	0.441342	0.969319
CG11345	0	0.147293	0	0	0.172021	0	0	0	0	0	1.91299	-0.937302	2.47651	0.126964	0.655469
CG11349	2.4961	3.97692	2.3446	1.46945	6.19277	3.04268	3.20205	4.38909	2.4955	2.46231	0.0917898	0.689378	0.045807	0.831077	1
CG11350	0	0	0.11723	0	0	0	0	0	0	0	1.22013	-1.17011	1.20294	0.280509	0.807515
CG11353	4.74259	5.00798	10.4335	10.2861	7.2249	22.651	17.4112	11.4952	6.37738	10.157	-0.876046	2.87002	7.81874	0.00636043	0.141666
CG11356	0	0	0	0.29389	0	0.338075	0	0	0	0	-0.828587	-0.869465	0.479827	0.490342	1
CG11357	53.9158	47.2812	64.5936	50.2552	53.6707	57.6418	60.6389	59.1483	59.3373	48.3228	-0.0791456	5.7618	1.00662	0.318492	0.8471
CG1136	37.9407	47.7231	69.0484	38.4996	49.8862	48.6828	39.2252	33.4407	37.4324	31.0866	0.361506	5.15406	6.42801	0.013017	0.214517
CG11360	132.793	96.6245	170.335	93.1631	95.6439	180.701	161.904	157.589	154.721	134.196	-0.421116	7.40139	4.22619	0.0427961	0.407892
CG11362	0	0.147293	0.351689	0.29389	0.172021	0	0.200128	0	0.277277	0	0.991499	-1.01626	1.07534	0.303067	0.831276
CG11367	14.727	13.1091	17.8189	12.6373	12.3855	16.0586	12.0077	13.3763	15.5275	13.2349	0.0173788	3.82248	0.0156105	0.900857	1
CG11368	333.978	345.256	526.245	281.546	271.622	416.002	324.008	255.403	338.833	318.561	0.0909527	8.26512	0.314373	0.576447	1
CG11369	0	0	0	0	0	0	0	0	0	0	0	-1.27014	0	1	1
CG1137	0.74883	0.294587	0.23446	0.29389	0.344043	0	0.200128	0.209004	0.277277	0.307788	0.906998	-0.632264	1.1251	0.291753	0.818405
CG11370	3.24493	0.294587	4.3375	4.11446	0	0	0	0	2.4955	0.307788	2.22674	0.294008	4.23851	0.0425016	0.406011
CG11373	0	0	0	0	0	0	0.200128	0	0	0	-1.45514	-1.29816	2.14183	0.200926	0.746845
CG11374	6.98908	4.4188	9.0267	4.11446	2.92436	7.94477	7.60488	7.52416	5.54554	6.15577	-0.329596	2.38155	1.84401	0.177987	0.746845
CG11377	23.9626	23.567	21.4531	25.8623	26.6633	25.8628	23.2149	33.0227	23.014	28.0087	-0.136266	4.61025	1.41949	0.236722	0.798316
CG11378	20.7176	25.3345	22.977	20.5723	29.5877	27.8912	24.2155	26.5436	26.0641	20.0062	-0.0636278	4.74913	0.312908	0.577336	1
CG11379	0	0	0	0	0	0	0	0	0	0	0	-1.24184	0	1	1
CG1138	0	0	0	0	0	0	0	0	0	0	0	-1.291	0	1	1
CG11380	0.99844	1.32564	1.99291	1.46945	1.20415	1.69038	1.4009	0.627013	2.21822	0.615577	0.111043	1.05799	0.0804367	0.777379	1
CG11381	0.24961	0	0	0.29389	0	0	0.200128	0	0	0	0.529045	-0.596603	0.183276	0.702588	1
CG11382	0	0.147293	0	0	0	0	0	0	0	0	1.24636	-0.811252	0.925433	0.339503	0.875827
CG11384	0	0	0.23446	0	0	0	0	0	0	0	1.85173	-1.16638	2.21224	0.143056	0.690592
CG11388	135.538	131.533	165.646	140.479	146.734	118.495	133.486	119.342	125.052	116.96	0.231996	6.85171	9.69554	0.00249921	0.0762851
CG1139	0	0	0.586149	0.29389	0.344043	0.169038	0.200128	0.418009	0.554554	0.307788	-0.223651	-0.400082	0.0674049	0.795766	1
CG11391	0	0.44188	22.3909	0	0.516064	0	0.600385	0.209004	1.10911	0.307788	3.67305	2.83244	4.64848	0.0338356	0.360949
CG11395	73.8846	74.9724	31.0659	48.4918	56.079	27.3841	18.4118	141.078	26.6186	24.6231	0.241457	6.37588	0.389678	0.534099	1
CG11396	24.2122	23.7142	27.9007	24.099	25.4592	24.0033	22.2143	28.8426	24.955	23.6997	0.0226819	4.71742	0.0469573	0.828951	1
CG11398	5.24181	5.15527	7.38548	7.05336	6.70884	6.42343	5.40347	4.5981	5.26827	6.15577	0.18161	2.80146	1.03272	0.312334	0.840613
CG11399	80.1248	64.0727	79.8335	62.3046	75.0014	72.3481	77.85	73.7786	76.2512	67.4056	-0.024055	6.20105	0.075136	0.784649	1
CG11400	46.1779	36.5288	18.5223	25.8623	37.5007	20.7916	14.4092	48.28	13.8639	19.0829	0.479623	5.27972	3.06487	0.0835193	0.550228
CG11403	4.49298	2.3567	2.93075	2.9389	3.26841	2.87364	2.20141	2.71706	2.4955	5.54019	0.0285131	1.95935	0.0105185	0.918548	1
CG11404	0.49922	0	0.351689	0	0.172021	0.169038	0	0.209004	0	0	1.0561	-0.826314	1.01223	0.317153	0.8465
CG11406	2.74571	2.79858	2.22737	1.46945	3.09639	2.7046	2.60167	2.71706	2.4955	3.07788	-0.117469	1.26252	0.150494	0.69901	1
CG11407	48.4244	84.9883	92.0254	55.8391	67.9485	30.9339	35.823	29.8876	41.037	32.9333	1.04656	5.66476	56.0568	5.33826e-11	1.48822e-08
CG11409	2.24649	2.79858	3.63412	2.9389	2.23628	1.01423	1.20077	1.25403	1.66366	1.23115	1.14331	1.38374	9.71363	0.0024772	0.0760734
CG11412	41.1857	47.8704	28.1352	45.259	37.3287	37.6954	39.8256	42.6369	47.969	45.5527	-0.0996299	5.46305	0.662631	0.417851	0.958726
CG11413	4.9922	6.18633	10.6679	5.58391	9.46118	5.4092	5.6036	3.76208	4.71371	4.61682	0.637328	2.63717	5.22177	0.0247329	0.30853
CG11414	56.9111	49.0487	36.9274	50.8429	50.2303	46.8234	51.0327	49.9521	45.7507	49.5539	-0.00153165	5.71926	0.000264626	0.987058	1
CG11417	3.74415	10.4578	2.11014	6.17169	5.84873	4.0569	4.2027	5.01611	5.26827	7.07913	0.170828	3.03368	0.233444	0.630193	1
CG11418	11.9813	10.7524	11.0196	11.4617	13.5897	11.8326	10.2065	12.3313	10.2593	11.696	0.058276	3.63914	0.187856	0.705967	1
CG1142	10.234	12.5199	5.97872	10.8739	15.1379	9.46611	10.6068	10.8682	9.7047	12.3115	0.0449479	3.68731	0.05279	0.818816	1
CG11423	0.49922	0.294587	0.23446	0	0.172021	0.338075	0.800514	0.209004	0	0.615577	-0.645292	-0.497649	0.576619	0.449787	0.974082
CG11425	35.195	9.86866	13.7159	13.225	14.1058	28.0602	33.2213	29.6786	29.3914	28.0087	-0.817679	4.94032	10.0078	0.00214618	0.0678622
CG11426	1889.55	2014.24	2296.88	1790.67	2147.86	1818.84	2231.63	2101.75	2496.33	1105.27	0.0559225	11.0573	0.225873	0.635789	1
CG1143	5.49142	11.047	6.09595	8.5228	8.60107	6.76151	5.80372	5.85213	4.15916	8.00249	0.383964	3.29229	3.57337	0.0620355	0.490961
CG11436	10.7332	9.1322	9.8473	9.69836	9.80522	7.94477	8.00514	9.4052	7.76376	9.84922	0.197357	3.39024	2.08999	0.151853	0.706791
CG11437	1.24805	1.17835	1.40676	1.17556	0.860107	1.3523	2.20141	2.09004	1.94094	1.53894	-0.616182	1.44443	2.67347	0.10564	0.620448
CG11438	7.98752	10.3105	12.778	9.40447	10.4933	10.8184	9.80629	9.1962	9.98198	5.84798	0.161056	3.76074	0.823929	0.366536	0.908304
CG11444	33.947	38.8855	22.977	40.8507	41.9732	28.2293	31.8204	37.4118	30.7778	31.3944	0.154582	5.25013	1.34234	0.249786	0.807515
CG11447	8.48674	9.72137	7.03379	5.29002	11.0094	7.60669	9.80629	8.77819	11.3684	11.0804	-0.195506	3.43547	1.41425	0.251615	0.807515
CG11448	284.805	265.865	229.653	275.081	289.684	253.049	268.572	251.432	249.272	291.475	0.0336422	8.02675	0.22445	0.636854	1
CG11449	0.49922	1.17835	0.11723	0	0.688086	1.3523	0.400257	1.88104	1.66366	1.84673	-1.36866	1.57752	9.01894	0.0034865	0.095448
CG11453	0.99844	1.62023	1.52399	1.17556	1.54819	0.338075	0.400257	0.418009	0.554554	0.923365	1.45043	0.899586	12.5186	0.000648495	0.0263316
CG11454	13.4789	15.4658	13.5987	17.6334	16.6861	16.3967	16.4105	15.4663	16.0821	15.3894	-0.0599314	3.96558	0.211768	0.646531	1
CG11455	128.799	166.147	176.079	133.426	148.971	140.977	142.692	129.374	137.252	116.036	0.178858	6.98771	3.41395	0.0680388	0.508074
CG11456	21.9657	17.2333	24.0321	14.9884	16.17	22.313	21.2136	18.8104	19.4094	24.3153	-0.157611	4.31193	1.71493	0.193788	0.746845
CG11458	92.855	189.714	214.648	93.1631	102.697	126.609	129.483	96.3511	100.097	63.4044	0.428856	7.21074	1.95941	0.165125	0.739106
CG11459	6.98908	1.47293	0.703379	0.881669	1.89224	1.01423	0.400257	24.2445	1.38639	1.53894	-1.40806	2.61929	2.09927	0.150958	0.705493
CG1146	57.4103	69.2279	53.3396	62.0108	62.9599	62.882	62.6402	60.6113	59.06	70.1757	-0.0476047	5.86716	0.185826	0.667478	1
CG11470	0	0.147293	0	0	0	0	0	0	0.277277	0.307788	-0.976477	-1.10541	0.75485	0.432237	0.962458
CG11474	39.9376	41.2422	40.0926	45.8468	43.8655	38.0335	38.6248	38.6658	37.7097	45.8605	0.0859486	5.33623	0.872974	0.352714	0.891081
CG11475	1.99688	1.91482	3.39966	2.64501	2.58032	0.845188	1.00064	1.46303	1.66366	2.46231	0.819444	1.17676	4.82838	0.0306467	0.342527
CG11486	238.627	238.321	269.629	213.07	222.596	258.29	261.168	244.326	254.54	247.462	-0.0976806	7.95774	1.66111	0.200863	0.746845
CG11498	9.9844	6.62821	6.91656	9.40447	10.3213	5.91632	7.60488	4.5981	6.1001	7.38692	0.442441	2.35922	4.76121	0.0317982	0.34764
CG11504	21.9657	23.8615	12.6608	27.9195	23.739	17.749	18.4118	22.1545	18.023	27.0854	0.0825314	4.45027	0.238019	0.626865	1
CG11505	204.181	183.97	213.358	161.933	162.216	224.82	229.347	201.271	205.74	169.284	-0.155001	7.5563	2.47568	0.119242	0.655469
CG11509	9.73479	8.54302	8.67501	11.7556	6.53682	10.4803	12.408	7.52416	11.6456	12.6193	-0.285385	3.3523	2.13611	0.147462	0.696799
CG11523	13.2293	16.7915	10.4335	12.3434	13.7617	11.3255	12.2078	12.7493	9.42743	17.2361	0.0901943	3.8403	0.356426	0.552045	1
CG11526	77.6287	81.4533	69.0484	78.4686	79.99	65.2485	72.0462	72.7336	70.983	63.7122	0.163822	6.18239	5.1832	0.0252553	0.312159
CG11529	0.99844	1.17835	1.05507	0.881669	1.72021	1.52134	1.20077	2.29905	2.21822	2.15452	-0.628837	1.39749	2.1434	0.146781	0.696681
CG11534	21.9657	19.4427	20.398	18.8089	18.2343	14.7063	19.2123	17.5564	14.4184	12.9271	0.318018	4.11005	6.70417	0.0112704	0.196799
CG11537	258.596	252.166	304.094	241.871	229.649	481.757	472.303	421.98	444.475	383.196	-0.776264	8.3748	118.35	6.4815e-18	4.71374e-15
CG11539	2.99532	3.82963	4.45473	4.11446	3.61245	2.7046	2.8018	3.13507	3.88188	2.77009	0.331853	2.20742	2.13722	0.147358	0.696681
CG11550	72.3869	81.7479	131.063	60.5413	65.1961	92.8017	72.2464	58.9393	72.3694	72.0225	0.165342	6.09425	1.06119	0.305794	0.83271
CG11555	7.23869	7.36467	7.50271	9.40447	9.11714	7.94477	8.80565	11.7043	9.42743	8.00249	-0.18514	3.35254	0.908338	0.343191	0.881638
CG11560	13.9782	12.6672	10.9024	10.58	14.9659	11.6636	13.2085	13.3763	11.0911	14.466	-0.012842	3.66985	0.00843264	0.927044	1
CG11562	11.9813	12.5199	6.6821	12.6373	13.4177	9.80418	10.4067	8.98719	7.20921	10.157	0.275872	3.45799	2.61964	0.109161	0.632688
CG11563	8.23713	9.27949	5.27534	8.81669	7.39692	7.94477	7.40475	8.56918	10.8138	12.0037	-0.258011	3.37861	1.54408	0.217344	0.766179
CG11566	0	0	0	0	0	0	0	0	0	0	0	-1.30545	0	1	1
CG11570	0	0.147293	0.11723	0	0.172021	0	0	0	0	0	2.33363	-1.23573	4.9111	0.0615965	0.489255
CG11576	45.429	48.165	61.7801	47.6102	51.2624	46.1473	57.2367	47.862	44.0871	44.0137	0.0895187	5.55636	1.21433	0.273509	0.807515
CG11577	33.1981	30.3425	30.597	31.1523	30.2758	34.1456	30.8198	36.1578	30.7778	36.0112	-0.11159	4.94699	1.15577	0.285312	0.811999
CG11581	0	0	0	0	0	0	0	0	0	0	0	-1.30545	0	1	1
CG11583	8.23713	9.27949	7.50271	7.34725	11.3534	8.28284	7.80501	8.56918	6.1001	9.84922	0.114374	3.45951	0.360844	0.549596	1
CG11584	0	0	0	0	0	0	0	0	0	0.307788	-1.49234	-1.24103	1.22062	0.280577	0.807515
CG11585	0.74883	1.03105	1.1723	0	0.688086	0.507113	0.400257	0.627013	0.831832	0.615577	0.402266	-0.465457	0.316109	0.575467	1
CG11586	15.2262	21.063	13.1297	22.6295	18.4063	15.0443	18.8121	17.7654	18.3003	19.6984	0.00893114	4.39157	0.00235719	0.961388	1
CG11588	0	0	0	0	0	0	0	0	0	0	0	-1.30545	0	1	1
CG11590	6.73947	11.047	9.61284	9.40447	7.74097	6.25439	9.20591	9.1962	7.20921	8.92586	0.142894	3.29748	0.679672	0.41195	0.952673
CG11593	53.4166	42.2732	47.1264	50.2552	45.7577	49.359	51.433	44.309	49.9099	44.0137	-0.00619889	5.54131	0.00654718	0.935695	1
CG11594	30.2028	49.4906	32.8243	40.5568	60.3795	31.61	23.6152	68.7625	31.3323	33.8567	0.175588	5.86694	0.452115	0.503111	1
CG11596	18.4711	17.5279	17.5845	19.1028	19.0944	21.6368	19.4125	20.9004	18.3003	25.8542	-0.208664	4.46541	2.91293	0.0914323	0.579094
CG11597	6.24025	4.71339	7.15102	5.29002	6.53682	7.09958	7.40475	6.89715	8.59559	6.46355	-0.273749	2.75985	1.81418	0.181499	0.746845
CG11598	0	0	0	0	0	0	0	0	0	0	0	-1.18425	0	1	1
CG11600	0	0	0	0	0	0	0	0	0	0	0	-1.25488	0	1	1
CG11601	25.7098	20.4738	33.645	21.7478	23.0509	25.0176	26.8172	26.5436	24.1231	22.4685	0.00090994	4.69927	5.43349e-05	0.994136	1
CG11608	0	0	0	0	0	0	0	0	0	0	0	-1.30545	0	1	1
CG1161	83.6194	91.322	81.123	89.0486	93.7517	75.2217	88.4568	88.8269	82.9059	78.486	0.0840788	6.3586	1.02862	0.31329	0.842159
CG11617	8.98596	12.2254	6.91656	10.8739	10.8374	13.354	10.6068	7.73317	12.4775	9.84922	-0.126454	3.28775	0.567677	0.453214	0.975871
CG11619	7.23869	7.51197	11.9574	10.2861	9.28916	7.26862	9.60616	9.4052	8.04104	9.84922	0.0810072	3.33613	0.210676	0.647381	1
CG11626	1.99688	1.47293	2.81352	0.881669	1.03213	1.18326	1.4009	1.46303	0.554554	1.53894	0.45726	1.49975	2.11325	0.14962	0.702608
CG11629	0	0	0	0	0	0	0	0	0	0	0	-1.30545	0	1	1
CG11630	0	0	0	0	0	0	0.400257	0.209004	0	0.307788	-3.01577	-1.16048	7.73307	0.0105325	0.192432
CG11634	0	0	0	0	0	0	0	0	0	0	0	-1.29804	0	1	1
CG11635	0.24961	0.147293	0.23446	0.29389	0	1.01423	0.600385	0.418009	0.554554	0.923365	-1.85615	-0.540043	4.33883	0.0401818	0.395621
CG11638	57.1607	50.8162	40.9132	49.9613	61.9277	47.8377	50.0321	49.1161	51.2963	57.8642	0.0257792	5.76561	0.0443735	0.833652	1
CG11652	26.2091	26.8074	25.0872	25.5684	25.9752	16.9038	18.6119	16.5114	16.0821	15.3894	0.629771	4.45438	32.3728	1.67455e-07	2.47878e-05
CG11655	19.22	20.0319	25.5561	19.1028	22.3628	25.6937	26.0167	26.9616	26.3413	22.1608	-0.252075	4.53852	4.36467	0.0396066	0.392449
CG11656	0	0	0	0	0	0	0	0	0	0	0	-1.16532	0	1	1
CG11658	102.59	98.2447	114.065	99.9225	100.461	85.8711	89.6575	85.0648	87.6196	85.8729	0.248241	6.61518	11.1067	0.00126366	0.0453589
CG11659	0	0	0	0	0	0	0	0	0	0	0	-1.2632	0	1	1
CG11663	0	0	0	0	0	0	0	0	0	0	0	-1.30545	0	1	1
CG11664	0	0	0	0	0	0	0	0	0	0	0	-1.30545	0	1	1
CG11665	110.078	100.012	187.802	99.6286	107.685	126.44	122.078	125.403	112.575	113.574	0.0163116	6.74813	0.021449	0.883901	1
CG11666	0	0	0	0	0	0	0	0	0	0	0	-1.2982	0	1	1
CG11668	7.23869	7.80655	7.61994	7.34725	6.36479	5.57824	5.00321	6.89715	4.99099	7.69471	0.282004	3.18321	1.97132	0.163861	0.736227
CG11670	0	0	0	0	0	0	0	0	0	0	0	-1.26917	0	1	1
CG11671	0	0	0	0	0	0	0	0	0	0	0	-0.943543	0	1	1
CG11672	0	0	0	0	0	0	0	0	0	0	0	-0.344313	0	1	1
CG11674	0	0.294587	0.468919	1.46945	0.344043	0.338075	0.200128	0	0.554554	0	0.989201	1.647	1.01138	0.317357	0.846729
CG11679	5.99064	5.59715	6.79933	6.17169	5.67671	4.22594	5.6036	4.8071	6.1001	5.54019	0.2175	2.81822	1.10222	0.296681	0.825191
CG11686	24.961	29.0168	56.9737	18.5151	27.3514	24.5105	24.6158	26.5436	21.6276	24.6231	0.385297	4.32082	4.52421	0.0362437	0.373536
CG11693	0	0.44188	1.1723	0.29389	0.860107	0.845188	0.200128	0.209004	0.277277	0.923365	0.308179	-0.640104	0.198234	0.657672	1
CG11694	0	0	0	0	0	0	0	0	0	0	0	-1.30545	0	1	1
CG11695	13.7286	17.9698	9.73007	13.8128	17.2021	15.0443	15.4099	14.6303	18.5776	17.2361	-0.154079	4.18668	0.828248	0.365289	0.907229
CG11696	14.9766	16.7915	10.5507	14.6945	14.7938	12.8469	12.8082	14.0033	13.3093	16.3128	0.0513802	3.85042	0.138811	0.732872	1
CG11697	0	0	0	0	0	0	0	0	0	0	0	-1.28335	0	1	1
CG11698	0	0	0	0	0	0	0	0	0	0	0	-1.25524	0	1	1
CG11699	28.4556	31.2262	24.501	35.2668	29.9317	22.9891	28.4182	27.1706	25.7868	23.6997	0.213966	4.8116	3.38663	0.0691297	0.508074
CG11700	0.99844	1.62023	1.1723	1.46945	1.89224	2.02845	1.60103	2.92606	1.66366	2.15452	-0.525017	1.37136	1.89067	0.17265	0.746845
CG11703	0	0	0	0	0	0	0	0	0	0	0	-1.30545	0	1	1
CG11710	17.9719	21.063	16.1777	22.9234	20.1265	19.7774	20.8134	19.4374	18.023	23.0841	-0.0466871	4.49104	0.174378	0.677276	1
CG11714	0.24961	0	0.468919	0.29389	0	0	0.400257	0.209004	0	0.307788	0.172137	-0.707026	0.0400346	0.841879	1
CG1172	25.4602	24.4507	24.97	21.454	22.1908	25.6937	26.8172	24.6625	24.4004	29.5477	-0.140285	4.90677	1.7726	0.186532	0.746845
CG11722	11.9813	14.8766	18.5223	14.6945	15.4819	18.9322	17.4112	15.8843	13.8639	17.5439	-0.138561	3.93336	0.967058	0.328136	0.859495
CG11723	18.7208	19.59	22.0392	19.3967	19.2664	18.9322	18.2117	17.1384	17.1912	13.5427	0.215465	4.32976	3.88016	0.0520348	0.454272
CG11726	0	0	0	0	0	0	0	0	0	0	0	-1.28351	0	1	1
CG11737	32.9485	35.7923	44.5473	28.2134	31.3079	41.2452	38.8249	37.8298	34.1051	36.319	-0.116556	5.17339	1.08177	0.301177	0.828993
CG11739	64.8986	82.1898	74.0892	77.5869	86.1827	61.5297	70.8455	103.039	58.7828	66.4823	0.0933995	6.45832	0.37872	0.539892	1
CG11741	0.99844	1.03105	1.1723	2.64501	2.06426	3.38075	2.60167	5.43412	3.32733	1.23115	-1.09295	1.97037	3.14	0.079888	0.538391
CG11752	93.8534	90.1436	108.086	88.4608	92.0315	73.5314	79.6511	74.6146	71.2602	69.2524	0.360036	6.17695	7.28568	0.00834712	0.169034
CG11753	29.9532	21.2103	27.7835	28.8012	28.5556	22.313	20.8134	24.0355	24.955	26.4698	0.200937	4.51148	2.19356	0.142194	0.689615
CG11755	6.98908	5.15527	7.15102	5.29002	4.98862	6.93054	5.80372	7.94217	6.93193	6.46355	-0.200421	2.65281	1.04431	0.309648	0.837579
CG11756	0	0	0	0	0	0	0	0	0	0	0	-1.24246	0	1	1
CG11760	0.74883	2.06211	0.351689	0.29389	0.344043	0.169038	1.00064	0.836018	0.554554	0.307788	0.436891	0.43335	0.714294	0.400336	0.940295
CG11762	0	0	0	0	0	0	0	0	0	0	0	-1.24226	0	1	1
CG11768	0	0	0.23446	0.29389	0.172021	0	0.400257	0.418009	0	0	-0.28864	-0.798798	0.0802488	0.777632	1
CG11771	70.39	68.4915	70.2207	69.6519	63.82	72.3481	72.6466	61.6563	65.1601	60.3265	0.0419489	5.98614	0.357506	0.606103	1
CG11777	4.49298	5.59715	3.86858	5.8778	6.36479	5.74728	6.60424	6.89715	6.37738	4.92461	-0.23668	2.55969	1.27336	0.262233	0.807515
CG11779	53.1669	52.7311	62.8352	49.9613	55.5629	60.1774	53.8345	50.7881	61.2783	47.7072	0.00462648	5.66048	0.00316512	0.955264	1
CG11781	11.2325	11.3416	13.9503	6.75947	12.2135	9.63515	12.2078	12.3313	12.4775	11.696	-0.0421728	3.50468	0.0690445	0.828067	1
CG11786	0	0	0.11723	0	0.172021	0.169038	0	0	0	0	0.451858	-1.10953	0.176528	0.702588	1
CG11788	4.49298	3.97692	2.57906	3.23279	6.70884	4.39498	3.60231	6.06113	3.05005	7.07913	-0.196029	2.24569	0.692	0.407758	0.946512
CG11790	50.1716	51.4054	53.2223	52.6063	51.6064	54.092	52.8339	53.0871	45.7507	48.3228	0.0253771	5.63097	0.0782722	0.795794	1
CG11791	117.816	124.463	124.029	101.98	102.009	122.214	123.879	118.088	121.17	117.883	-0.0795236	6.82548	0.70168	0.40451	0.943425
CG11796	70.6397	132.859	102.693	110.796	114.738	26.0318	49.6319	50.9971	28.8368	38.4735	1.45528	6.19024	35.4044	5.45559e-08	9.03521e-06
CG11802	24.7114	31.9627	26.8456	31.7401	29.2436	19.6084	23.415	25.2895	26.8959	25.5464	0.264632	4.67915	4.77369	0.0315808	0.346622
CG11807	43.9314	38.2963	51.6983	44.3774	46.6178	41.9213	45.8294	42.6369	35.2142	40.9358	0.121979	5.39831	1.82216	0.180551	0.746845
CG11808	1.99688	2.94587	1.64122	3.52668	4.8166	3.54979	1.20077	3.13507	2.77277	2.46231	0.158831	2.03587	0.275135	0.65032	1
CG11811	21.7161	25.4818	23.3287	31.1523	26.1473	30.2577	31.22	27.5886	29.9459	25.5464	-0.185735	4.7097	3.21983	0.0762178	0.525321
CG11815	0	0	0	0	0	0	0	0	0	0	0	-1.30545	0	1	1
CG11816	0.24961	0	0.11723	0	0	0	0.400257	0	0	0	-0.243252	-0.889266	0.0462346	0.830276	1
CG11825	0.99844	1.91482	2.11014	0.29389	0.688086	0.507113	1.00064	0.836018	1.10911	0.923365	0.594737	1.12931	1.89187	0.172516	0.746845
CG11828	0.24961	0.294587	0.351689	0	0	0.845188	1.00064	0.627013	0	0.923365	-1.66418	-0.255339	5.77619	0.0183642	0.258133
CG11835	23.2137	33.141	13.9503	27.0379	27.0074	21.4678	18.4118	21.1095	24.6777	29.5477	0.113998	4.29585	0.402914	0.527251	1
CG11836	3.74415	2.50399	3.16521	3.52668	2.4083	3.88787	3.80244	3.34407	1.10911	3.69346	-0.0905823	2.09792	0.0903222	0.764483	1
CG11837	4.24337	3.97692	5.5098	6.46558	3.44043	5.4092	4.40283	3.55308	4.43644	4.30904	0.0741819	2.53133	0.123424	0.763236	1
CG11839	4.24337	3.68234	3.39966	3.23279	6.19277	3.71883	3.00193	3.34407	3.88188	5.54019	0.117483	2.27813	0.267417	0.60638	1
CG11841	16.9735	21.9467	19.9291	45.5529	28.7276	15.8895	20.8134	39.2928	12.4775	18.4673	0.28587	4.62547	1.30515	0.256402	0.807515
CG11842	10.4836	7.36467	3.16521	9.11058	7.56894	5.57824	4.2027	28.2156	3.32733	4.61682	-0.377127	4.35199	0.615772	0.43475	0.964593
CG11843	1.24805	1.17835	1.28953	4.11446	2.4083	0.507113	0.600385	0.836018	0	0.307788	1.98395	0.564365	14.2052	0.000297564	0.014947
CG11851	9.9844	9.42678	16.8811	7.34725	11.1814	16.2276	13.4086	16.0933	14.1411	14.1583	-0.403598	3.68715	4.43328	0.0381212	0.386925
CG11852	7.23869	6.03903	8.20609	4.70224	4.8166	4.90209	4.00257	4.38909	6.1001	7.69471	0.24121	2.79312	0.922179	0.339559	0.875838
CG11854	0.49922	0.736467	0.937839	0.29389	0.344043	0.338075	0.600385	0	0.831832	0.615577	0.387042	0.270091	0.417384	0.519942	1
CG11857	88.6116	93.2368	101.404	86.4036	98.2243	94.6611	91.0584	91.544	71.8148	72.638	0.1482	6.43884	4.10406	0.045838	0.424594
CG11858	4.49298	7.51197	4.22027	9.11058	6.19277	4.39498	5.80372	3.76208	6.93193	5.84798	0.232597	3.01654	1.1495	0.286612	0.812965
CG11864	0	0	0	0	0	0	0	0	0	0	0	-1.30545	0	1	1
CG11865	0	0	0	0	0	0	0	0	0	0	0	-1.27661	0	1	1
CG11873	207.426	183.38	164.356	179.273	172.193	201.662	213.137	203.57	200.471	203.14	-0.173806	7.52608	2.78751	0.0985889	0.60252
CG11876	335.476	363.52	324.375	327.981	344.043	246.626	265.771	272.333	268.404	273.316	0.354458	8.14185	12.739	0.000585101	0.0244675
CG11878	0	0	0.23446	0.29389	0.172021	0	0.200128	0.209004	0	0	0.534716	-0.355931	0.210452	0.647555	1
CG11880	76.6303	77.0345	87.5707	74.3541	78.4418	67.446	70.0449	64.5824	64.8829	69.8679	0.228326	6.04937	8.25107	0.0051135	0.123603
CG11882	2.99532	3.38775	3.63412	1.76334	1.89224	2.87364	2.40154	2.50805	3.32733	1.53894	0.139871	2.328	0.363336	0.548224	1
CG11883	122.559	97.2137	119.809	110.796	97.0201	105.141	114.273	99.2771	97.8789	107.726	0.0610629	6.83847	0.762111	0.385067	0.926765
CG11885	4.24337	5.30257	7.15102	4.99613	4.12851	5.91632	5.00321	7.31516	6.37738	5.2324	-0.187144	2.50323	0.698532	0.408868	0.947795
CG11889	0.24961	0	0	0	0	0	0	0	0	0	1.29247	-1.29058	1.38965	0.280509	0.807515
CG11891	0	0	0	0	0	0	0	0	0	0	0	-1.30545	0	1	1
CG11892	2.4961	3.24046	3.16521	2.35112	3.95649	1.52134	1.60103	1.46303	2.21822	1.84673	0.846606	1.34934	4.59683	0.0348151	0.366855
CG11893	0	0.147293	0.11723	0	0	0	0	0	0	0.307788	0.434458	1.96362	0.205081	0.702588	1
CG11897	59.1576	46.9866	42.6717	46.7285	38.5328	46.3163	43.628	46.399	52.6827	52.0162	-0.0441893	5.56421	0.121377	0.728386	1
CG11898	0.49922	0.147293	0.11723	0	0	0	0	0	0	0	2.73587	-0.935074	4.70172	0.033135	0.355972
CG11899	42.9329	40.653	25.5561	39.3812	32.6841	28.7364	26.417	47.235	23.2913	31.3944	0.192486	5.8856	0.570351	0.452155	0.975285
CG11902	33.6974	32.11	29.7764	25.8623	35.6084	30.2577	34.0218	32.3957	34.3824	35.0879	-0.0752261	4.96367	0.550887	0.459951	0.980839
CG11905	0	0.883761	0.586149	0.58778	0.344043	0	0.600385	0.418009	0.277277	0.923365	0.268373	-0.457943	0.124883	0.724651	1
CG11906	13.4789	14.4348	11.0196	10.58	10.6653	14.1992	9.80629	13.5853	16.3594	11.0804	-0.10907	3.77375	0.559295	0.456557	0.978883
CG11911	0	0	0	0	0.172021	0	0	0	0	0	1.258	0.885354	0.697534	0.407824	0.946533
CG11912	0	0	0	0	0	0	0	0	0	0	0	-0.879899	0	1	1
CG11913	0	0.147293	0.468919	0	0.172021	0.507113	0	0	0	0.307788	0.155344	-0.568715	0.0309108	0.860847	1
CG11920	7.73791	8.39573	7.50271	8.5228	6.88086	6.76151	7.20462	9.4052	6.93193	7.38692	0.0448922	3.05901	0.0559049	0.813644	1
CG11927	13.2293	13.4037	12.8953	17.0456	15.654	10.8184	14.009	11.0772	16.0821	14.466	0.123099	3.83168	0.894799	0.346795	0.885185
CG11929	0	0	0	0	0	0	0	0	0	0	0	-1.26525	0	1	1
CG11951	19.22	21.063	26.2595	23.2173	17.2021	9.29707	14.8095	16.3024	9.98198	10.157	0.815384	3.97554	17.3178	7.39429e-05	0.00500746
CG11961	34.6958	38.2963	46.5402	28.8012	36.6406	35.1598	33.8217	39.7109	32.996	28.6243	0.125339	5.13933	1.6394	0.203805	0.750897
CG11964	17.9719	17.2333	8.90947	21.454	20.4706	13.354	15.2098	18.3924	18.3003	20.9296	-0.0128757	4.34834	0.0048874	0.944425	1
CG11966	0	0.147293	0	0	0	0	0	0.209004	0	0	-0.213531	-1.14771	0.0308287	0.867893	1
CG11970	42.6833	44.0407	36.4585	47.0224	42.3173	41.2452	38.6248	43.2639	46.5826	42.167	0.00172877	5.37971	0.00032677	0.985619	1
CG11975	33.4478	29.7533	41.4994	32.6218	32.34	32.4552	32.2207	35.7398	33.5505	29.8555	0.0528483	5.09765	0.235724	0.62853	1
CG11977	0	0.147293	0	0	0	0	0	0	0	0.307788	-0.246187	-1.19954	0.0397815	0.867893	1
CG11980	20.2184	24.4507	24.501	22.6295	23.5669	25.3556	23.6152	24.8715	23.014	26.4698	-0.0905057	4.61669	0.521736	0.472035	0.990502
CG11982	41.4353	48.9014	37.6308	56.133	46.9619	43.2736	44.2284	45.981	39.0961	40.3203	0.110194	5.52815	1.42745	0.287888	0.813842
CG11983	2.99532	3.82963	4.3375	5.29002	2.4083	4.56402	3.60231	3.97109	3.6046	2.77009	-0.00130229	2.05235	3.17477e-05	0.995517	1
CG11984	179.719	209.009	129.07	204.253	199.201	148.922	148.295	159.888	170.248	205.91	0.145308	7.45499	1.55752	0.215371	0.7644
CG11985	7.98752	12.3727	11.723	12.6373	13.0736	9.80418	13.2085	8.56918	11.3684	12.3115	0.0775793	3.54583	0.255501	0.614504	1
CG11986	7.4883	5.44986	6.56487	8.5228	6.53682	4.0569	5.00321	5.43412	7.48649	7.38692	0.243536	2.66241	1.63007	0.205083	0.753023
CG11997	1.74727	0.883761	2.3446	1.76334	1.72021	0.845188	1.80116	1.46303	1.38639	0.615577	0.448946	0.440799	0.875654	0.35198	0.890706
CG11999	16.4743	16.4969	10.5507	15.2823	17.7182	17.5799	15.61	20.2734	14.1411	19.3907	-0.194091	4.02638	1.62618	0.20562	0.754089
CG12003	0	0	0	0	0.172021	0	0	0	0	0	1.26145	-1.29152	1.56032	0.280509	0.807515
CG12004	160.749	139.34	188.037	134.308	135.897	178.842	182.517	173.265	177.735	161.897	-0.204124	7.28193	6.84063	0.0104998	0.192432
CG12006	47.6755	49.0487	54.1602	40.2629	45.2416	53.2469	56.036	44.309	48.5235	48.9383	-0.0830617	5.69449	1.14827	0.305523	0.832526
CG12007	29.9532	26.5128	24.6183	27.3318	25.6312	23.1582	19.2123	24.8715	24.1231	23.3919	0.221344	4.60522	4.51792	0.0363704	0.373917
CG12009	0	0.147293	0.351689	0.29389	0.172021	0	0	0	0	0.307788	1.68741	-1.05345	2.73734	0.102432	0.610176
CG12010	5.49142	6.62821	8.44055	7.34725	7.05288	5.07113	8.20527	8.15118	4.71371	6.15577	0.117507	2.68208	0.292975	0.589701	1
CG12011	0.24961	0.736467	0.703379	0.58778	0.860107	0.338075	0	0	0.554554	0.923365	0.958919	0.134776	1.05694	0.306758	0.83379
CG12012	31.7005	24.0088	32.0037	19.6906	26.6633	27.2151	29.4189	33.6497	25.2322	24.6231	-0.061236	4.7813	0.283345	0.595871	1
CG12014	7.73791	6.03903	5.86149	7.93503	8.42905	5.24017	5.00321	6.27013	4.71371	5.54019	0.405856	3.22013	5.75838	0.0246246	0.307861
CG12016	0.49922	0	0.468919	0	0	0.338075	0.400257	0	0.277277	0.615577	-0.567509	-0.632519	0.340735	0.560912	1
CG12017	0.49922	0.294587	0.468919	0.29389	0.344043	0.169038	0.400257	0.209004	0	0.307788	0.729959	-0.546845	0.700646	0.405086	0.943978
CG12018	4.49298	5.59715	4.92365	4.11446	3.61245	4.39498	6.20398	3.55308	6.1001	4.00125	-0.0776802	2.45828	0.0962147	0.77767	1
CG12020	0	0	0	0	0	0	0	0	0	0	0	-1.2834	0	1	1
CG12024	72.6365	76.4453	80.3024	68.4763	72.249	72.1791	79.2509	75.2416	67.3784	66.1745	0.0394299	6.15795	0.294264	0.588885	1
CG12025	148.019	163.643	208.904	156.937	158.948	218.228	220.542	189.358	197.144	149.277	-0.220039	7.52963	5.80157	0.0181178	0.257045
CG12027	0.24961	0	0.11723	0	0	0	0	0	0	0.615577	-0.312509	-1.13404	0.0685744	0.814027	1
CG12034	24.961	21.063	22.1564	22.0417	23.739	23.3272	27.2175	24.8715	23.5686	24.9308	-0.123226	4.59472	1.02274	0.314669	0.844314
CG12035	0	0	0	0	0	0	0	0	0	0	0	-1.29805	0	1	1
CG12038	37.4415	35.9396	34.4656	47.904	49.0261	33.9766	39.6254	33.2317	39.0961	45.2449	0.0987488	5.18618	0.939686	0.33504	0.868941
CG12042	28.7052	30.4897	23.5632	30.2707	32.34	25.0176	25.4163	26.3346	28.5596	26.7776	0.136776	4.81574	2.03057	0.157733	0.722531
CG12050	18.4711	16.4969	18.1706	17.6334	20.2985	21.6368	23.6152	16.7204	17.7457	21.2374	-0.151008	4.27887	1.18634	0.279072	0.807515
CG12054	154.509	146.115	152.282	149.59	150.003	150.613	154.299	138.361	152.502	140.351	0.0313499	7.22641	0.171127	0.680129	1
CG12056	15.975	18.1171	16.5294	21.7478	12.3855	13.354	14.2091	13.3763	18.8549	16.3128	0.155984	4.09513	1.68747	0.19736	0.746845
CG12057	0	0.147293	0.11723	0	0	0	0	0	0	0	1.89387	0.826683	1.78362	0.186213	0.746845
CG12061	0	0	0	0	0	0	0	0	0	0	0	-1.18131	0	1	1
CG12065	63.6506	78.802	63.8902	75.8236	71.3889	57.3038	58.4375	69.5985	56.5646	61.2499	0.221129	5.94661	5.28557	0.0238938	0.302306
CG12069	0	0	0	0	0	0	0	0	0	0	0	-1.27714	0	1	1
CG12071	80.8737	106.051	66.4693	106.094	102.353	105.479	103.066	100.113	107.861	124.039	-0.227842	6.67601	2.7168	0.102896	0.611637
CG12075	53.6662	62.3051	63.773	56.4268	57.4552	51.3874	48.4311	40.9649	47.969	35.0879	0.389597	5.55366	14.9128	0.000215757	0.0115672
CG12078	0	0.147293	0.11723	0	0	0	0	0.209004	0	0	0.41488	-1.26954	0.155067	0.702588	1
CG1208	29.454	25.3345	31.7693	25.8623	19.2664	34.8218	27.2175	19.2284	28.005	22.4685	-0.00551367	4.38812	0.000861777	0.976648	1
CG12081	24.961	23.1251	21.4531	26.4501	25.2872	22.651	22.6145	23.8265	24.1231	22.4685	0.0621602	4.6548	0.386961	0.650176	1
CG12082	29.9532	34.614	26.7284	35.5607	38.3608	23.3272	29.4189	33.2317	32.1642	32.9333	0.131989	4.90229	1.086	0.30024	0.828552
CG12084	104.836	96.9191	102.224	93.7509	102.353	90.9422	98.8634	102.412	97.3243	101.878	0.0263332	6.57966	0.132597	0.716636	1
CG12090	188.456	175.721	160.722	166.048	162.732	149.598	160.703	150.901	160.266	184.673	0.0833475	7.43769	1.16217	0.283991	0.810081
CG12091	189.704	196.784	175.845	213.952	208.146	182.223	178.314	184.969	173.576	190.521	0.113333	7.60576	2.65209	0.107023	0.624623
CG12093	30.702	32.5519	34.7	33.2095	29.5877	26.7079	23.2149	32.3957	25.2322	34.1645	0.18725	4.87401	3.77075	0.0553855	0.468513
CG12096	14.2278	18.559	20.2808	22.0417	24.427	21.4678	22.6145	21.9455	20.2412	23.6997	-0.139944	4.37147	1.41286	0.23781	0.800854
CG12099	185.46	213.281	159.667	201.902	190.6	181.546	173.111	184.76	181.617	203.756	0.0401047	7.60514	0.332798	0.565503	1
CG12104	10.234	11.6362	11.1368	9.40447	11.3534	15.0443	10.2065	12.7493	14.4184	10.4648	-0.220457	3.83348	1.76858	0.187027	0.746845
CG12105	3.99376	6.48091	2.22737	2.05723	3.26841	3.04268	3.00193	3.97109	4.15916	7.07913	-0.172099	2.40244	0.352363	0.571613	1
CG12106	12.2309	10.8997	16.4122	17.3395	13.0736	12.5088	15.61	13.1673	12.7548	12.0037	0.0743922	3.63862	0.290758	0.59111	1
CG12107	15.2262	23.1251	24.1493	24.3929	26.3193	23.1582	24.6158	25.7076	22.7367	24.9308	-0.0908516	4.79313	0.594963	0.442592	0.970073
CG12111	0	0	0.11723	0	0	0	0.400257	0.209004	0.277277	0.307788	-2.09642	-0.877672	3.54372	0.063107	0.495117
CG12112	10.7332	4.12422	5.5098	5.8778	5.16064	6.93054	7.00449	7.52416	8.04104	9.23365	-0.324518	2.83742	2.13543	0.147525	0.696881
CG12115	0	0.294587	0.351689	0	0	0.338075	0	0	0	0.615577	-0.120812	-1.07378	0.0141483	0.985301	1
CG12116	140.53	123.579	39.5064	132.544	92.0315	79.6167	35.0225	183.506	61.001	67.7134	0.293839	7.16738	0.714313	0.40033	0.940295
CG12118	45.6786	49.7852	50.0571	43.2018	37.8447	40.569	44.0283	43.2639	41.8689	51.7084	0.0389819	5.38536	0.142128	0.707091	1
CG12119	21.9657	51.4054	24.8527	16.4578	25.8032	18.7632	18.4118	18.1834	22.1822	36.9346	0.339418	5.13091	0.860413	0.356184	0.896194
CG12121	105.086	92.0584	111.368	107.27	101.493	101.254	99.0636	92.798	86.7878	92.3365	0.129667	6.51305	4.15757	0.0444778	0.417732
CG12123	11.2325	8.69031	12.8953	9.40447	11.0094	10.4803	10.6068	12.9583	12.4775	13.2349	-0.15156	3.39824	1.19009	0.34765	0.885949
CG12125	28.7052	26.5128	26.7284	22.3356	25.1151	26.5389	26.8172	27.3796	28.8368	19.6984	-0.000234997	4.73819	4.54142e-06	0.998305	1
CG12126	0	0	0	0	0	0	0	0	0	0	0	-1.30545	0	1	1
CG12128	15.2262	14.2875	16.5294	14.9884	15.4819	15.3824	14.009	18.8104	19.964	14.7738	-0.110959	4.20619	0.721888	0.397853	0.938646
CG12129	14.2278	12.6672	18.1706	9.69836	18.0623	14.8753	13.6087	13.3763	14.6957	11.0804	0.12002	3.95387	0.607737	0.437752	0.966791
CG1213	205.928	226.979	310.542	231.879	202.297	180.025	151.097	167.413	135.034	144.353	0.597893	7.52475	18.6434	4.15325e-05	0.00298161
CG12133	0	0	0	0	0.172021	0	0	0	0	0	1.2614	-1.2276	1.34073	0.280509	0.807515
CG12134	3.49454	5.00798	3.28243	4.11446	4.64458	3.71883	6.00385	5.85213	3.88188	3.38567	-0.165137	2.53503	0.415143	0.521063	1
CG12147	0	0	0	0	0.172021	0	0	0	0	0	1.26143	-1.25635	1.69594	0.280509	0.807515
CG12155	32.4493	31.9627	25.7906	31.4462	27.0074	22.9891	25.6164	31.1417	27.1732	29.5477	0.122213	4.85911	1.53148	0.219214	0.768397
CG12158	180.468	273.671	202.104	189.853	192.664	273.503	244.757	166.577	275.059	266.545	-0.237503	8.07607	2.43525	0.122258	0.655469
CG12159	18.4711	21.7994	21.2186	17.9273	19.6104	19.6084	19.4125	21.1095	25.2322	24.3153	-0.131646	4.49437	1.40096	0.346835	0.885185
CG12162	56.4119	56.8553	48.2987	61.1291	59.6914	52.5707	52.4336	45.772	47.4144	55.0941	0.15413	5.67106	2.58235	0.111678	0.639517
CG12163	276.318	292.525	206.793	292.126	304.994	223.806	236.352	274.214	233.19	261.62	0.158812	8.00131	2.95604	0.0891063	0.574064
CG12164	0.24961	0.589174	0.11723	0	0.344043	0.169038	0	0	0.277277	0.307788	0.924675	0.686846	1.16557	0.283291	0.809526
CG12170	21.4665	25.1872	24.6183	25.2745	26.1473	24.3414	22.0141	23.4085	21.3503	22.1608	0.114467	4.5868	0.99046	0.322385	0.851765
CG12171	18.9704	17.5279	13.7159	16.7517	18.0623	16.7347	12.408	20.0644	14.1411	14.466	0.116064	4.07034	0.537631	0.465383	0.984733
CG12173	14.2278	15.3185	13.7159	16.1639	16.342	12.0017	13.2085	12.9583	9.7047	16.3128	0.240323	3.91887	3.08728	0.0824176	0.546201
CG12177	25.7098	26.3655	24.8527	23.2173	32.5121	21.8059	25.0161	22.7815	25.7868	25.8542	0.137485	4.71396	1.0897	0.299424	0.828248
CG12179	5.99064	4.71339	3.16521	4.99613	4.98862	4.56402	5.80372	4.5981	5.54554	6.46355	-0.192158	2.80912	0.753868	0.387638	0.928944
CG1218	5.74103	10.4578	5.74426	6.75947	7.39692	7.77573	9.80629	8.77819	11.0911	7.38692	-0.298695	3.17584	1.98807	0.162101	0.732512
CG12182	15.4758	18.4117	18.6395	13.225	12.7296	16.7347	16.0103	17.1384	13.5866	12.0037	0.0578893	3.89928	0.208094	0.6494	1
CG12184	0	0	0	0	0	0.169038	0	0.209004	0.277277	0	-2.6436	-0.887792	5.90021	0.0267496	0.319438
CG12194	131.295	101.632	147.241	108.151	104.589	107.001	111.872	104.711	113.406	110.804	0.115753	6.65929	1.54736	0.21686	0.765531
CG12200	0.24961	0.147293	0	0	0.172021	0	0	0	0.277277	0.307788	0.174486	-1.01058	0.0296722	0.863754	1
CG12203	147.52	166	126.374	134.014	155.335	110.551	122.278	107.846	135.866	124.962	0.279622	6.92512	6.54701	0.012232	0.207089
CG12204	3.49454	5.15527	1.05507	3.82057	4.47256	3.38075	2.8018	2.29905	2.4955	4.00125	0.245974	2.22231	0.488921	0.486271	1
CG12206	0.99844	1.32564	0.820609	0.58778	0.172021	0.845188	1.00064	0.627013	0	0.307788	0.390745	0.60611	0.575832	0.449997	0.974082
CG12207	87.8628	90.4382	91.7909	86.9914	94.9558	106.156	93.8602	91.335	101.483	88.3352	-0.0900993	6.58759	2.13757	0.147325	0.696681
CG12209	0.24961	0	0.351689	0.29389	0.172021	0	0	0.209004	0	0	1.75463	-0.951016	2.75729	0.100405	0.604344
CG12213	76.1311	76.0034	62.6007	74.648	78.9578	81.8142	86.0552	82.1388	83.1832	84.6418	-0.18338	6.2462	4.81589	0.0308573	0.342527
CG12219	11.9813	17.8225	14.6537	11.4617	18.4063	15.0443	18.0116	14.4213	14.973	15.6972	-0.0560734	3.94798	0.146112	0.831603	1
CG12224	19.9688	8.24843	6.79933	4.11446	7.56894	8.11381	5.20334	10.6592	5.82282	5.54019	0.365428	2.92525	1.94041	0.167166	0.741894
CG12229	0	0	0.23446	0.29389	0.344043	0	0.400257	0	0	0	0.821082	-0.941001	0.596698	0.44203	0.969938
CG12231	0	0	0	0	0	0	0	0	0	0	0	-1.20714	0	1	1
CG12236	37.9407	43.5989	37.5135	38.2057	40.081	46.9925	42.2271	43.8909	45.4735	48.9383	-0.202445	5.47183	3.88858	0.0517859	0.453046
CG12237	75.6319	70.4063	69.5173	72.2969	71.3889	63.051	72.2464	67.9265	75.4194	65.8667	0.0601189	6.13705	0.662367	0.417943	0.958726
CG12239	288.3	383.405	114.065	382.938	391.349	202.169	244.957	272.124	277.277	603.881	-0.0353017	8.52481	0.0148885	0.903165	1
CG12241	33.4478	38.4436	34.8173	31.1523	34.9204	30.4268	27.4176	36.1578	31.3323	32.3178	0.137502	5.08259	2.3199	0.131348	0.667159
CG12253	11.7317	12.2254	13.0125	12.9312	9.6332	12.3397	12.408	9.4052	11.3684	12.0037	0.0483561	3.61126	0.0953936	0.758166	1
CG12256	2.74571	2.50399	3.28243	1.17556	2.23628	3.88787	1.60103	1.25403	2.21822	4.92461	-0.142442	2.02262	0.137436	0.711742	1
CG12259	5.49142	6.03903	3.98581	7.05336	8.08501	4.0569	6.60424	4.18009	2.77277	5.84798	0.364409	2.91993	2.32839	0.130653	0.66467
CG12262	110.827	149.061	107.031	113.148	111.814	92.8017	88.2566	155.917	89.5605	100.339	0.168002	6.99319	0.697974	0.405749	0.944101
CG12263	32.4493	26.8074	42.2027	27.0379	30.1038	30.4268	36.0231	32.3957	38.8188	32.3178	-0.0900901	4.85497	0.621873	0.62284	1
CG12264	54.415	51.4054	51.9328	56.7207	59.5194	48.3448	54.0347	45.354	44.9189	59.4031	0.120902	5.68563	1.83515	0.179021	0.746845
CG12267	6.73947	3.82963	6.09595	3.82057	5.84873	6.08535	4.80308	7.94217	5.26827	5.84798	-0.18232	2.90103	0.8765	0.351748	0.890589
CG12268	5.74103	7.51197	10.3162	13.8128	10.1493	4.22594	6.80437	6.47914	4.15916	2.15452	0.952581	2.78874	15.6788	0.000152859	0.00909917
CG12269	57.6599	77.3291	67.5244	74.0602	91.3434	54.9372	56.4362	62.2833	61.2783	52.0162	0.35979	6.07295	6.75016	0.0110043	0.194371
CG1227	8.23713	10.3105	14.4193	9.40447	11.1814	9.63515	9.00578	13.5853	9.98198	7.38692	0.123734	3.45997	0.460757	0.499069	1
CG12272	42.6833	35.7923	36.4585	33.5034	36.1245	32.7933	37.0238	32.8137	35.7688	40.6281	0.0470152	5.18319	0.261204	0.610586	1
CG12278	0.24961	0.44188	0.468919	0.881669	0.172021	0.169038	0	0.209004	0.554554	0	1.14106	-0.556099	1.93108	0.16818	0.743824
CG12279	10.234	9.57408	10.0818	6.75947	11.3534	7.26862	8.20527	8.36018	8.59559	13.8505	0.0907466	3.44521	0.386494	0.53577	1
CG12288	1.49766	1.76752	0.468919	1.46945	2.92436	1.69038	2.40154	1.88104	2.4955	2.15452	-0.392525	1.28117	0.832452	0.364081	0.906247
CG12289	0	0	0	0	0	0	0	0	0	0	0	-1.30545	0	1	1
CG12290	52.1685	44.7772	55.098	47.904	42.1453	50.2042	48.4311	42.0099	44.3644	45.2449	0.0709048	5.57521	0.435859	0.510869	1
CG12299	38.44	41.2422	28.3696	36.7362	41.6292	35.6669	42.6274	37.6208	41.5916	43.7059	-0.109802	5.3565	0.788861	0.376889	0.918959
CG12301	6.98908	6.18633	2.22737	4.40835	5.16064	6.42343	4.00257	6.06113	4.99099	7.69471	-0.246433	3.22453	0.907132	0.34351	0.881638
CG12304	31.4509	31.6681	31.7693	35.8546	33.8882	31.61	38.6248	30.0966	30.2232	32.3178	0.0114798	4.98934	0.0149775	0.9484	1
CG12307	0	0	0	0	0	0	0	0	0	0	0	-1.28329	0	1	1
CG12309	0.24961	0	0	0	0	0	0	0	0	0	1.29224	-1.24038	1.43498	0.280509	0.807515
CG1231	6.98908	5.59715	4.22027	8.22891	7.05288	5.74728	6.00385	9.4052	8.59559	4.30904	-0.123464	2.81691	0.421197	0.518047	1
CG12310	0	0	0	11.1678	1.20415	0	0	3.34407	0	0	1.60494	0.284939	1.25253	0.269257	0.807515
CG12316	30.702	35.2031	21.3358	30.2707	37.3287	26.7079	32.4208	25.9166	31.8869	38.1657	0.00198153	4.98621	0.0001904	0.989022	1
CG12320	8.73635	7.95385	5.97872	6.46558	6.53682	6.76151	6.60424	9.82321	5.26827	10.7726	-0.134602	2.91774	0.549077	0.460686	0.981144
CG12321	11.2325	12.8145	11.4885	12.3434	15.998	13.692	14.2091	11.4952	12.7548	18.1595	-0.127489	3.71864	0.647401	0.423232	0.962458
CG12325	11.4821	11.047	12.778	12.9312	11.8695	13.354	13.0083	11.2862	11.6456	15.3894	-0.103318	3.76814	0.5237	0.471205	0.990385
CG1233	42.9329	42.4205	38.3341	34.0912	46.1018	37.6954	38.4247	40.9649	39.0961	38.4735	0.0696326	5.3005	0.718067	0.399099	0.939054
CG12333	66.1467	64.9564	53.2223	62.0108	60.2075	50.2042	48.231	52.2511	51.2963	50.7851	0.276314	5.87062	8.45514	0.00461606	0.115415
CG12338	38.44	43.7462	33.5277	36.4423	41.9732	33.4695	28.2181	48.9071	27.4504	28.9321	0.212036	5.39873	1.59862	0.209469	0.756735
CG1234	10.7332	12.8145	9.96453	17.0456	13.5897	12.5088	16.0103	15.8843	9.98198	14.1583	-0.11645	3.8029	0.506019	0.478767	0.994083
CG12341	17.4727	18.1171	23.7977	19.9845	20.1265	21.8059	19.6126	16.9294	20.5185	18.1595	0.039707	4.18665	0.101727	0.75053	1
CG12343	12.4805	20.4738	13.1297	21.454	19.7825	13.8611	18.2117	17.7654	18.023	17.2361	0.0361831	4.38142	0.0705158	0.791214	1
CG12344	12.4805	13.551	17.1156	11.4617	18.4063	12.1707	15.4099	10.4502	12.2002	6.77134	0.356343	4.04125	2.71083	0.10327	0.61243
CG12347	0	0	0	0	0.172021	0	0	0	0	0	1.26145	-1.28385	1.42721	0.280509	0.807515
CG12355	46.6771	35.9396	67.9933	38.4996	44.3815	58.318	59.4381	50.9971	58.2282	41.2436	-0.195315	5.65567	1.7616	0.187891	0.746845
CG1236	13.9782	13.8456	13.8331	14.4006	19.4384	14.3682	11.8076	14.8393	13.032	11.0804	0.206834	4.02841	2.24538	0.137626	0.679278
CG12360	72.8861	69.3752	80.8886	73.7663	78.0977	83.5046	79.451	84.6468	80.4104	82.1795	-0.128565	6.27453	3.9206	0.0508521	0.448157
CG12362	0	0	0.23446	0	0	0.169038	0.200128	0	0.277277	0	-0.785857	-0.819014	0.521537	0.476863	0.992594
CG12374	0	0.147293	0.11723	0.29389	0	0	0	0	0.277277	0	0.903068	4.01347	0.0375942	0.846783	1
CG12375	24.7114	24.598	27.3145	22.9234	24.7711	26.0318	25.6164	23.8265	22.1822	23.0841	0.0425603	4.63608	0.127477	0.721925	1
CG12376	0	0	0	0	0	0	0	0	0	0	0	-1.24852	0	1	1
CG12379	1.24805	3.09316	3.04798	1.76334	2.4083	2.87364	2.60167	3.97109	2.4955	2.77009	-0.294715	1.65678	1.05955	0.336097	0.870129
CG12384	65.1482	65.1037	70.3379	62.8924	57.9712	52.9088	43.628	62.4923	41.5916	48.9383	0.363415	5.91714	12.255	0.000733734	0.0294321
CG1239	3.74415	6.03903	5.39257	3.23279	4.8166	4.90209	4.40283	5.64312	5.26827	6.77134	-0.163565	2.56457	0.410708	0.597077	1
CG12391	23.713	27.2493	11.8402	29.6829	27.5234	15.3824	22.6145	18.6014	28.5596	38.4735	-0.035718	4.84019	0.0268146	0.870306	1
CG12393	26.9579	34.614	24.97	34.679	34.5763	24.6795	28.4182	25.2895	30.2232	32.9333	0.142129	4.82486	1.28158	0.26071	0.807515
CG12395	0	0	0	0	0	0	0	0	0	0.307788	-1.49251	-1.26917	2.10048	0.200926	0.746845
CG12398	0	0	0.11723	0	0	0.169038	0	0	0	0	-0.217119	-1.11011	0.0335776	0.867893	1
CG12400	115.819	152.301	137.745	130.193	156.195	117.481	127.282	116.206	126.161	118.498	0.194784	6.91478	3.40428	0.0684231	0.508074
CG12402	32.4493	27.2493	35.7551	33.5034	26.3193	35.3289	44.2284	32.1867	42.1461	33.2411	-0.271084	5.11907	6.48258	0.0126506	0.210554
CG12404	36.4431	31.9627	42.7889	33.2095	35.9525	32.9623	34.4221	40.3379	41.037	30.7788	0.0104401	5.08198	0.0111505	0.916146	1
CG12413	7.73791	11.6362	7.50271	12.3434	11.3534	10.6494	9.80629	10.6592	6.65465	8.31028	0.1095	3.39891	0.366341	0.655374	1
CG12420	0.49922	0.147293	0.468919	0	0	0.676151	0.800514	0.418009	0	0	-0.765525	-0.346332	1.24358	0.267848	0.807515
CG12426	0	0	0.351689	0.29389	0	0	0	0	0	0	2.66727	-1.05818	4.64435	0.0347439	0.366855
CG12428	20.468	17.9698	17.2328	17.9273	19.9545	22.1439	20.6132	27.7976	12.7548	20.314	-0.160846	4.87943	0.7218	0.397881	0.938646
CG12438	0	0	0	0	0	0	0	0	0	0	0	-1.26934	0	1	1
CG12439	0	0	0	0	0	0	0	0	0	0	0	-1.29814	0	1	1
CG12446	0	0	0	0	0	0	0	0	0	0	0	-1.2484	0	1	1
CG12448	0	0	0.586149	0.29389	0	0.169038	0.200128	0	0.277277	0	0.49463	-0.851837	0.262447	0.609802	1
CG1246	0.24961	0.44188	0.23446	0.29389	1.03213	0.676151	1.00064	0.209004	0.277277	0.923365	-0.412971	0.163108	0.296505	0.587472	1
CG12464	0	0	0	0	0	0	0	0	0	0	0	-1.30545	0	1	1
CG12470	0.99844	1.17835	2.11014	0.881669	0.688086	1.18326	1.60103	1.46303	2.4955	1.84673	-0.455475	0.646943	1.21915	0.311643	0.839565
CG12477	0	0	0	0.29389	0	0	0	0	0	0	1.30306	-1.22648	1.5132	0.280509	0.807515
CG12479	0	0.147293	0	0	0	0	0	0	0	0	1.2458	-1.29133	1.73963	0.280509	0.807515
CG12480	0	0.294587	0	0	0.172021	0	0	0	0	0	2.35568	-1.16784	3.86621	0.0615965	0.489255
CG12481	0	0	0	0	0	0	0	0	0	0	0	-1.30545	0	1	1
CG12483	0.99844	2.79858	2.57906	1.46945	1.03213	0.676151	1.80116	1.67204	1.66366	1.53894	0.357466	1.29718	0.665683	0.416785	0.958009
CG12484	136.786	125.789	134.697	131.075	147.938	125.088	131.885	128.747	120.893	134.503	0.0772462	6.98961	1.17488	0.281389	0.808088
CG12490	0	0	0.11723	0	0	0	0	0	0	0	1.22059	-1.07803	1.03295	0.315704	0.845262
CG12491	0	0	0	0	0	0	0	0	0	0	0	-1.30545	0	1	1
CG12493	0	0	0.23446	0	0.172021	0.507113	0	0	0	0	-0.2718	-0.747851	0.0572993	0.811378	1
CG12496	0	0	0	0	0	0	0	0	0	0	0	-1.24806	0	1	1
CG12498	0	0	0	0	0	0	0	0	0	0	0	-1.23493	0	1	1
CG12499	19.7192	19.59	17.7017	15.5762	15.998	17.918	20.0128	23.1995	16.3594	19.3907	-0.128504	4.27434	0.521345	0.472201	0.990532
CG12502	112.824	103.105	114.885	111.09	108.546	100.577	103.266	99.4861	96.4925	111.727	0.106111	6.75538	1.94722	0.166432	0.741894
CG12506	0	0	0.11723	12.9312	0	0	0	0	0	0	6.36741	1.63259	3.16791	0.0828569	0.547348
CG12507	0.24961	0.147293	0.468919	0	0.172021	0.507113	0	0.836018	0.277277	0.307788	-0.697637	-0.593637	0.823952	0.36653	0.908304
CG12511	0	0.147293	0	0	0	0	0	0	0	0	1.2458	-1.28365	1.49818	0.280509	0.807515
CG12512	49.1732	44.0407	41.851	44.3774	51.4344	39.0477	34.8223	39.7109	38.2643	41.8592	0.253362	5.51549	4.86323	0.0300667	0.340736
CG12516	0	0	0	0	0	0	0	0	0	0	0	-1.29089	0	1	1
CG12517	0	0	0.11723	0	0	0.169038	0	0.418009	0	0	-1.40117	-1.00964	1.38911	0.243273	0.807515
CG12519	0	0	0	0	0.172021	0	0.200128	0.209004	0.277277	0	-1.39762	-1.17899	1.57396	0.215333	0.7644
CG12520	0.74883	1.76752	2.3446	0.58778	0.860107	1.3523	1.20077	0.836018	0.277277	1.53894	0.346987	0.379263	0.607426	0.437869	0.966791
CG12521	0	0	0.11723	0	0.172021	0.169038	0	0	0	0	0.451863	-1.0586	0.156668	0.702588	1
CG12522	0	0.294587	1.05507	0.58778	0.344043	0.338075	1.00064	0.209004	0.277277	0	0.318835	-0.083964	0.181128	0.671852	1
CG12523	0	0	0	0	0	0	0	0	0	0	0	-1.23487	0	1	1
CG12531	259.594	215.048	322.616	220.417	208.834	262.684	263.769	230.741	236.517	229.302	0.00460352	7.96295	0.001757	0.966661	1
CG12535	0	0	0	0	0	0.338075	0	0	0.277277	0	-2.62518	-0.84726	5.00906	0.0278873	0.327529
CG12538	0	0	0	0	0	0	0	0	0	0	0	-1.29828	0	1	1
CG12539	0	0	0	0.29389	0	0	0	0	0	0	1.3018	-1.06429	1.06752	0.305211	0.832333
CG12540	0	0	0	0	0	0	0.200128	0	0	0	-1.45516	-1.2495	1.72563	0.200926	0.746845
CG12541	28.7052	30.1952	40.9132	27.0379	31.3079	37.1883	40.0257	32.3957	36.046	31.0866	-0.152609	5.32239	1.52627	0.219993	0.769354
CG12546	0	0	0	0	0	0	0	0	0	0	0	-1.30545	0	1	1
CG12547	110.577	85.4302	169.866	90.2242	93.0636	146.218	143.492	132.718	124.497	116.652	-0.270033	6.85636	4.21716	0.0430136	0.409033
CG12560	11.4821	11.047	11.6058	11.1678	11.0094	11.6636	12.6081	13.7943	8.87287	12.9271	-0.0913487	3.60512	0.23757	0.62719	1
CG12567	69.3916	63.1889	109.141	54.9574	56.251	104.465	95.061	80.6757	94.2743	84.0262	-0.370418	6.30905	5.86656	0.0175022	0.250651
CG12576	120.562	111.796	117.464	104.037	94.6118	107.339	106.468	114.743	109.247	120.961	-0.0256384	6.89955	0.106846	0.816127	1
CG12581	106.584	116.509	135.752	109.327	97.0201	122.721	112.272	96.9781	119.229	108.649	0.0154939	6.76455	0.036678	0.848567	1
CG12582	60.9049	55.9715	61.6629	61.1291	77.2376	59.8393	61.6396	73.9876	54.0691	55.7097	0.0519107	6.11199	0.340563	0.561011	1
CG12589	0	0.147293	0.11723	0	0	0	0	0	0	0.307788	0.382872	-1.18775	0.125659	0.724433	1
CG12590	1.24805	1.03105	0.937839	2.35112	0.688086	1.3523	1.60103	1.88104	1.66366	0.307788	-0.226818	0.528099	0.246834	0.620564	1
CG12592	0	0	0	0	0	0	0	0	0	0	0	-0.938341	0	1	1
CG12594	44.6802	48.6068	49.0021	52.9002	46.6178	50.3732	51.6331	52.0421	46.8599	56.0175	-0.0876401	5.55105	1.30055	0.257237	0.807515
CG12605	189.953	133.301	176.9	166.929	165.657	231.92	218.34	181.416	211.84	178.825	-0.29768	7.54733	7.85373	0.00624863	0.139734
CG12607	0	0.589174	0	0	0	0	0	0.209004	0	0	1.21898	-1.13745	1.10854	0.296989	0.825191
CG12608	22.7145	22.094	13.247	24.9806	20.6426	17.0728	17.6113	18.8104	20.7958	24.9308	0.0578522	4.39446	0.159415	0.810834	1
CG12609	0	0	0.11723	0.29389	0	0	0	0	0	0	1.92827	-1.173	2.49335	0.126964	0.655469
CG12617	0	0	0	0	0	0	0.200128	0	0	0	-1.45542	-0.984795	1.10854	0.297764	0.825875
CG12620	0	0	0	0	0	0	0	0	0	0	0	-1.29802	0	1	1
CG12637	0	0	0	0	0	0	0	0	0	0	0	-1.27062	0	1	1
CG12640	0	0	0	0	0	0	0	0.209004	0	0	-1.45955	-1.0568	1.7459	0.200926	0.746845
CG12643	3.49454	4.86068	5.04088	2.9389	4.47256	4.90209	3.80244	4.18009	5.82282	4.00125	-0.0827236	2.72142	0.0700718	0.791857	1
CG12645	0	0	0.23446	0	0	0	0.200128	0	0	0.307788	-0.3427	-1.09544	0.0823771	0.814027	1
CG1265	33.4478	44.4826	49.5882	35.8546	41.1131	35.6669	40.0257	31.9777	41.037	36.6268	0.15269	5.26507	1.45693	0.230685	0.787799
CG12655	6.98908	5.59715	6.6821	2.64501	3.78447	6.59247	5.80372	3.34407	4.99099	4.00125	0.064414	3.01251	0.0718794	0.789253	1
CG12659	1.74727	2.65128	3.98581	2.05723	1.54819	2.53556	1.60103	2.71706	3.6046	4.30904	-0.208538	1.68953	0.485065	0.720732	1
CG12661	0	0	0	0	0	0	0	0	0	0	0	-1.27674	0	1	1
CG12662	0	0.147293	0	0	0	0	0	0	0	0	1.24581	-1.26239	1.60143	0.280509	0.807515
CG12672	2.4961	1.62023	1.75845	1.46945	3.44043	1.18326	1.80116	1.04502	1.38639	1.84673	0.58364	1.57464	2.84352	0.095319	0.591395
CG12674	0	0	0	0	0	0	0	0	0	0	0	-1.27761	0	1	1
CG12679	0	0	0	0	0	0	0	0	0	0	0	-1.30545	0	1	1
CG12680	0	0.147293	0	0	0.172021	0	0	0	0	0	1.9128	-1.24823	2.98308	0.126964	0.655469
CG12681	0	0	0.468919	0	0	0	0	0	0.277277	0.307788	0.38002	-0.955143	0.111177	0.739788	1
CG12682	0	0	0	0	0	0	0	0	0	0	0	-1.22849	0	1	1
CG12684	0	0	0	0	0	0	0.200128	0	0	0	-1.45518	-1.23676	2.0764	0.200926	0.746845
CG12688	0	0	0	0.58778	0.172021	0	0.400257	0	0	0	0.295736	-0.862322	0.068724	0.851557	1
CG12689	0	0	0.23446	0	0	0.338075	0.200128	0	0	0	-0.746698	-0.886428	0.484726	0.488142	1
CG12691	0	0	0	0	0	0	0	0	0	0	0	-1.30545	0	1	1
CG12692	0	0	0	0	0	0	0	0	0	0	0	-1.29072	0	1	1
CG12693	0	0	0	0	0.172021	0	0.200128	0.418009	0	0	-1.37583	-1.03137	1.55543	0.216012	0.764511
CG12698	0.49922	0	0	0.58778	0.344043	0	0	0	0	0	3.36018	-1.02949	7.8283	0.00820701	0.167617
CG12699	0	0	0	0	0	0	0	0	0	0	0	-1.23213	0	1	1
CG12702	0	0.294587	0.351689	0	0	0	0	0.209004	0	0.307788	0.722363	-0.0853266	0.447095	0.505484	1
CG12708	0	0	0.11723	0.29389	0.172021	0	0	0	0	0	2.38175	-0.43545	2.91618	0.0920537	0.580828
CG1271	20.7176	21.7994	22.2737	24.099	23.0509	19.7774	19.2123	20.6914	21.3503	22.4685	0.115736	4.47957	0.901908	0.344896	0.882535
CG12713	2.74571	2.65128	1.40676	1.46945	2.06426	2.02845	2.40154	3.55308	3.6046	2.15452	-0.403919	1.67398	2.01601	0.159214	0.725636
CG12715	0	0	0.11723	0	0	0	0	0	0.277277	0	-0.263866	-1.1543	0.0392481	0.867893	1
CG12716	0.49922	0.736467	0.937839	1.17556	1.54819	0.845188	0.800514	2.09004	0.277277	0.923365	-0.0439063	2.05259	0.0101192	0.920103	1
CG12717	15.7254	18.1171	15.4743	14.9884	16.5141	18.2561	21.814	15.2573	20.7958	25.2386	-0.31343	4.23802	4.12438	0.0453164	0.42193
CG12721	0	0	0	0	0.172021	0	0.200128	0	0.554554	0.307788	-1.79093	-0.231704	1.64093	0.204136	0.751944
CG12723	0.24961	0	0	0	0.172021	0.169038	0	0	0	0	0.517405	-0.969256	0.163858	0.702588	1
CG12725	0	0	0	0	0	0	0	0	0	0	0	-1.24748	0	1	1
CG12728	8.73635	10.4578	14.8882	7.64114	9.80522	12.3397	15.0096	15.2573	16.6366	15.3894	-0.495311	3.68123	9.17702	0.00322441	0.0904944
CG12729	0	0	0	0	0	0	0	0	0	0	0	-1.29111	0	1	1
CG1273	0	0.147293	0	0.58778	0.344043	0.169038	0	0	0	0.307788	0.88374	-0.696323	0.653201	0.421276	0.96148
CG12730	32.1997	36.5288	50.5261	33.2095	36.9846	41.7523	46.4298	39.9199	35.4915	30.7788	-0.033433	5.32781	0.0839121	0.992732	1
CG12736	38.9392	38.5909	37.9825	48.4918	39.2209	36.005	30.4195	36.3668	33.2733	40.0125	0.203745	5.04449	4.06455	0.0468712	0.430777
CG12744	1.99688	2.06211	3.04798	0.881669	2.58032	2.02845	1.00064	3.97109	1.66366	0.923365	0.164265	1.30819	0.189598	0.664327	1
CG12746	61.6537	57.5917	48.0642	60.5413	56.251	49.528	50.0321	49.7431	51.019	60.9421	0.119969	5.71474	2.02924	0.157868	0.722675
CG1275	190.702	157.604	252.865	176.334	166.689	171.742	173.711	161.142	166.644	165.898	0.171315	7.40053	3.6941	0.0578715	0.481779
CG12766	3.24493	2.06211	1.28953	1.17556	3.44043	2.7046	0.400257	1.88104	1.94094	2.15452	0.294928	1.31608	0.601215	0.440213	0.968433
CG12768	18.7208	18.8536	19.3429	14.9884	15.998	19.1013	19.4125	16.3024	19.1321	20.314	-0.0910524	4.32939	0.543567	0.498049	1
CG12769	60.9049	59.5066	70.3379	50.8429	56.251	69.1364	77.4497	57.8942	74.8649	57.5564	-0.174591	5.99418	3.08914	0.0823268	0.546201
CG12772	34.1966	34.7613	29.3075	32.3279	29.4157	29.7506	30.2194	29.2606	33.5505	34.7801	0.0241622	4.97713	0.0656886	0.798325	1
CG12773	35.6942	37.5598	40.6787	35.8546	40.425	39.0477	36.0231	51.4151	37.987	40.0125	-0.101624	5.3027	0.825749	0.36601	0.908131
CG12780	0	0	0	0	0.172021	0	0	0	0	0	1.26118	-0.973315	0.771032	0.384759	0.926689
CG12782	0	0	0	0	0	0	0	0	0	0	0	-1.30545	0	1	1
CG12783	0.49922	0.294587	0.23446	0.58778	0.516064	0.169038	0.400257	0.209004	0.277277	0.307788	0.541649	-0.39427	0.58898	0.458233	0.980161
CG12784	0	0	0	0	0	0	0	0	0	0	0	-1.30545	0	1	1
CG12788	0	0	0	0	0	0	0	0	0	0	0	-1.30545	0	1	1
CG12795	23.9626	27.5439	22.0392	27.6256	28.5556	16.3967	18.2117	17.5564	21.3503	23.3919	0.428867	4.38094	10.4139	0.00176261	0.0586146
CG12796	0	0	0	0	0	0	0	0.209004	0	0	-1.45953	-1.14165	1.79298	0.200926	0.746845
CG12811	13.9782	15.1712	9.8473	14.9884	13.7617	13.354	13.0083	16.7204	14.1411	14.7738	-0.0975131	4.03726	0.300972	0.584676	1
CG12814	61.6537	69.6698	84.9916	61.423	54.5308	90.4351	83.8538	71.0615	74.033	70.1757	-0.227119	6.1415	4.80019	0.0311245	0.34387
CG12817	10.7332	13.8456	13.9503	10.2861	11.5254	17.0728	16.2104	16.3024	16.0821	19.3907	-0.472663	4.49268	14.5905	0.000249685	0.0128904
CG12818	2.4961	4.71339	2.46183	6.75947	7.56894	5.91632	3.80244	5.22511	3.32733	4.30904	0.0445655	2.49872	0.0213722	0.884107	1
CG12822	39.4384	36.9707	39.1548	48.7857	42.3173	35.4979	40.0257	38.2478	33.5505	55.4019	0.0289165	5.34887	0.113723	0.736756	1
CG12824	0.24961	0	0.468919	0	0.688086	0	0.200128	0	0	0.307788	1.51508	-0.590414	2.30374	0.132681	0.669929
CG12825	1.99688	2.79858	3.16521	2.35112	2.58032	2.02845	2.60167	1.46303	1.94094	4.30904	0.126805	1.77443	0.135766	0.71342	1
CG12826	0.49922	0.294587	0	0.29389	0	0.169038	0.200128	0.209004	0.554554	0	-0.22948	-0.76485	0.0592836	0.808231	1
CG12828	0	0	0	0	0	0	0	0	0	0.307788	-1.4921	-1.19932	1.87428	0.200926	0.746845
CG12831	0	0	0	0	0	0	0	0.209004	0	0	-1.4595	-1.20611	2.08345	0.200926	0.746845
CG12836	0.24961	1.17835	0.937839	1.17556	1.03213	0.338075	0.800514	0.627013	1.38639	0.923365	0.249675	0.544089	0.228704	0.633684	1
CG12848	10.7332	13.8456	9.96453	14.1067	17.2021	12.3397	14.4092	11.4952	12.2002	10.7726	0.0961638	3.86631	0.430106	0.554735	1
CG12849	0	0	0	0	0	0	0	0	0	0	0	-1.2908	0	1	1
CG12851	71.3885	71.29	82.1781	68.7702	70.3568	79.2786	84.4542	68.1355	82.6286	69.2524	-0.0749777	6.19339	0.756686	0.386757	0.928581
CG12853	0	0.147293	0	0	0	0	0	0	0	0	1.24615	-1.02952	1.3997	0.280509	0.807515
CG12857	0.99844	1.17835	1.05507	0.58778	1.37617	1.01423	0.600385	1.04502	0.831832	1.53894	0.104721	0.350386	0.0569095	0.812009	1
CG12858	361.435	311.968	432.695	340.618	334.066	381.18	388.649	351.337	389.575	325.024	-0.0437338	8.51991	0.284811	0.594923	1
CG12859	80.8737	96.0353	83.4676	82.2891	87.3869	62.882	73.8474	62.0743	72.9239	75.7159	0.311335	6.16417	6.82313	0.0105954	0.192432
CG12860	0	0	0	0	0	0	0	0	0	0	0	-1.22343	0	1	1
CG12861	0	0	0	0	0	0	0	0	0	0	0	-1.29807	0	1	1
CG12862	0	0	0	0	0	0	0	0	0	0	0	-1.27716	0	1	1
CG12863	9.48518	6.18633	9.0267	5.8778	9.97724	7.43766	7.20462	5.64312	8.59559	8.00249	0.153057	2.83231	0.67914	0.412132	0.952831
CG12866	0.24961	0	0	0	0	0	0.200128	0	0	0	-0.16267	-1.27693	0.0256741	0.874087	1
CG12868	12.2309	12.2254	13.3642	7.64114	12.9016	13.8611	13.4086	10.6592	7.20921	9.23365	0.0995579	3.69989	0.352927	0.554	1
CG12869	1.24805	2.65128	1.87568	2.05723	2.06426	1.52134	1.80116	1.67204	1.94094	1.23115	0.285063	0.956804	0.741202	0.391638	0.93358
CG1287	0	0.147293	0.351689	0	0.172021	0.507113	0	0.627013	0	0.615577	-0.984344	-0.51765	1.18456	0.279429	0.807515
CG12877	20.9672	22.3886	13.5987	19.9845	22.1908	18.5941	23.8153	20.9004	24.1231	26.7776	-0.203142	4.49029	1.51879	0.221116	0.771027
CG1288	0	0	0	0	0	0	0	0	0	0	0	-1.29066	0	1	1
CG12880	2.74571	3.09316	4.3375	2.35112	1.89224	4.22594	2.60167	3.13507	1.38639	4.61682	-0.11973	1.36513	0.164705	0.758904	1
CG12883	5.99064	4.4188	4.3375	4.11446	6.53682	5.57824	2.8018	4.38909	3.32733	3.07788	0.373563	2.44264	2.48779	0.118355	0.655469
CG12885	1.49766	0.589174	1.28953	0.58778	1.20415	1.85941	1.80116	1.04502	1.94094	1.84673	-0.681371	1.28155	2.68419	0.104953	0.61817
CG12895	29.7036	32.6992	37.0446	28.8012	31.6519	30.2577	30.2194	22.7815	24.955	21.2374	0.303174	4.68665	6.78285	0.0108191	0.193648
CG12896	1.24805	2.50399	1.64122	2.64501	1.37617	2.02845	1.4009	1.46303	1.66366	1.84673	0.150109	1.29917	0.1242	0.725373	1
CG12898	0	0	0	0	0	0	0	0	0	0	0	-1.20839	0	1	1
CG12902	0	0	0	0	0	0	0	0	0	0	0	-1.30545	0	1	1
CG12907	0	0	0	0	0	0	0	0	0	0	0	-1.30545	0	1	1
CG12909	2.4961	3.09316	1.52399	3.52668	3.61245	2.7046	1.60103	2.92606	1.38639	4.92461	0.0711617	1.97551	0.0414576	0.839132	1
CG1291	17.4727	20.3265	18.5223	22.6295	23.911	14.5372	18.2117	19.8554	20.2412	16.005	0.21161	4.19737	2.65256	0.106992	0.624623
CG12910	10.4836	9.27949	8.79224	9.99225	9.28916	14.8753	15.2098	13.1673	15.8048	16.6206	-0.6652	4.01145	25.4926	2.40937e-06	0.000256698
CG12911	0.99844	0.589174	0.23446	0.881669	1.03213	0.676151	0.800514	0.418009	1.94094	0.307788	-0.191919	-0.0961456	0.11312	0.737428	1
CG12912	0	0	0	0	0	0	0	0	0	0	0	-1.30545	0	1	1
CG12913	28.2059	25.6291	31.7693	28.5073	25.4592	28.0602	28.6184	29.8876	31.8869	35.7034	-0.137087	4.74976	2.03502	0.157576	0.722526
CG12914	0	0	0.11723	0	0.172021	0	0	0	0	0	1.88882	-1.25519	2.57212	0.126964	0.655469
CG12917	0	0	0.23446	0	0	0.169038	0.200128	0.209004	0.554554	0.307788	-1.70621	-0.990932	3.14426	0.0804725	0.54069
CG12920	0	0	0	0	0.172021	0.338075	0.200128	0	0	0	-1.33748	-1.18697	1.75943	0.209795	0.756735
CG12923	0.24961	0.147293	0.11723	0.29389	0.172021	0.338075	0.400257	0.209004	0.277277	0.307788	-0.705512	-0.325357	0.914761	0.341499	0.87908
CG12926	19.22	23.7142	19.9291	21.1601	27.6955	19.2703	24.4157	16.5114	21.0731	18.7751	0.161664	4.37645	1.60966	0.207917	0.756735
CG12929	4.24337	4.86068	3.75135	4.99613	4.47256	3.04268	5.80372	4.5981	3.6046	2.77009	0.147937	2.10552	0.41228	0.551248	1
CG12934	0.24961	0.147293	0	0	0	0.507113	0.600385	0	0.277277	0.307788	-1.94795	-0.656807	3.54819	0.0629442	0.495002
CG12935	4.74259	3.68234	7.73717	6.17169	5.67671	6.25439	6.80437	4.8071	6.93193	9.23365	-0.252185	2.84676	1.59421	0.218148	0.767109
CG12942	7.73791	6.03903	6.33041	9.40447	7.05288	7.60669	6.60424	6.47914	9.7047	7.69471	-0.0747808	3.09117	0.122847	0.726812	1
CG12945	31.4509	30.1952	43.375	30.5645	28.3835	47.6686	50.6325	43.4729	42.1461	40.0125	-0.445503	5.34478	15.5719	0.000160358	0.00926126
CG12947	7.23869	7.07009	6.21318	6.17169	7.56894	4.56402	5.20334	3.76208	5.54554	7.38692	0.395399	2.53112	3.53651	0.0633706	0.496303
CG12948	14.4774	11.047	10.7851	8.81669	13.9337	10.1423	9.60616	11.2862	11.0911	10.4648	0.170958	3.47158	1.32246	0.253297	0.807515
CG12950	128.3	118.424	170.1	122.258	119.899	156.36	145.693	126.03	146.402	138.197	-0.111291	7.06924	1.37889	0.243487	0.807515
CG12951	0	0	0	0	0	0	0	0	0	0	0	-1.25749	0	1	1
CG12963	0	0	0	0	0.172021	0	0	0	0	0	1.26087	-0.718971	1.0425	0.310699	0.838357
CG12964	0.99844	1.03105	1.1723	1.17556	1.72021	1.18326	1.00064	1.46303	0.277277	1.23115	0.220387	0.309609	0.33557	0.591164	1
CG12970	0.24961	0.147293	0	0.29389	0.172021	0.338075	0	0.209004	0	0.307788	-0.212532	-0.717586	0.05466	0.815719	1
CG12971	0	0	0.11723	0	0.172021	0.169038	0.200128	0.209004	0	0.307788	-1.11142	-0.916839	1.24138	0.268415	0.807515
CG12974	0.24961	0.736467	0.586149	0.29389	0.344043	0.676151	0.600385	0	0.554554	1.23115	-0.301368	0.0195064	0.183018	0.669847	1
CG12975	13.7286	11.9308	11.0196	10.58	12.7296	11.1565	15.61	12.7493	14.6957	15.6972	-0.213041	3.89906	2.0278	0.158014	0.723147
CG12983	0	0	0	0.29389	0	0	0	0	0	0	1.30319	-1.24143	1.50333	0.280509	0.807515
CG12984	0	0	0	0.29389	0	0	0	0	0	0	1.30313	-1.23474	1.42868	0.280509	0.807515
CG12985	1.74727	1.32564	1.1723	1.17556	1.89224	1.3523	0.600385	1.88104	1.94094	1.84673	-0.0372383	0.746813	0.00852156	0.937172	1
CG12986	0	0	0	0	0	0	0	0	0	0	0	-1.20795	0	1	1
CG1299	53.9158	68.6388	78.1923	67.3008	58.8313	53.754	59.0379	48.698	54.9009	65.2511	0.22093	5.81636	3.3194	0.0718962	0.512702
CG12990	0	0	0	0.29389	0	0	0.200128	0	0	0	-0.153602	-1.05847	0.0226643	0.880737	1
CG12991	103.588	92.9422	108.672	89.9303	94.4398	88.9138	92.2592	81.3027	87.8969	72.3302	0.211159	6.48997	6.80519	0.0106945	0.19339
CG12992	1.99688	1.47293	1.52399	2.35112	1.72021	1.18326	1.4009	0.418009	1.38639	1.23115	0.661612	0.329138	1.94865	0.166277	0.741882
CG12994	20.7176	19.0009	15.2399	17.9273	19.4384	16.9038	18.0116	15.8843	17.1912	18.4673	0.0914055	4.10101	0.48137	0.489647	1
CG12995	0.49922	0.589174	0.23446	0.58778	1.54819	0	0	0.209004	0.277277	0.923365	1.45013	-0.234583	3.39831	0.0692045	0.508074
CG12998	0.49922	0.294587	0.468919	0.29389	0.688086	0.845188	0.400257	0	0.554554	0.615577	-0.0870457	-0.139538	0.0141525	0.905578	1
CG13000	0	0	0	0	0	0	0	0	0.277277	0	-1.48439	-1.23423	1.81963	0.200926	0.746845
CG13001	12.2309	11.047	9.73007	17.3395	11.8695	11.8326	11.6074	10.4502	11.9229	12.6193	0.0685496	3.71005	0.235299	0.900776	1
CG13002	0	0.294587	0	0	0	0	0	0	0	0	1.89909	-0.942274	1.55589	0.21614	0.764511
CG13003	24.961	38.2963	34.9345	23.2173	35.6084	31.9481	27.2175	26.3346	29.3914	26.4698	0.162916	4.57795	1.40633	0.238889	0.803195
CG13004	7.4883	11.6362	8.90947	10.8739	8.60107	12.3397	9.60616	16.5114	10.2593	11.696	-0.349529	3.66857	4.94384	0.0287693	0.332118
CG13005	6.48986	6.18633	5.27534	3.52668	5.50469	5.57824	7.00449	7.94217	3.88188	3.69346	-0.0710837	2.58915	0.119132	0.73081	1
CG13008	0.99844	1.32564	1.40676	2.64501	1.03213	1.3523	1.20077	1.67204	1.94094	1.84673	-0.133107	1.00196	0.121334	0.728432	1
CG13010	0.49922	0.147293	0.468919	0	0.516064	0.507113	0.400257	0	0	0.307788	0.371306	-0.413692	0.215417	0.643712	1
CG13012	13.4789	15.1712	11.2541	13.8128	10.6653	11.1565	8.60552	8.36018	7.76376	8.61807	0.515175	3.48127	9.20943	0.00317325	0.0896367
CG13014	5.49142	5.30257	7.38548	4.99613	4.64458	5.07113	4.80308	5.85213	3.88188	6.15577	0.129596	2.7176	0.368906	0.54518	1
CG13016	10.234	7.07009	9.61284	8.5228	12.2135	11.1565	10.8069	13.7943	10.8138	10.157	-0.255578	3.28829	2.03096	0.157694	0.722531
CG13018	4.74259	5.59715	3.16521	7.64114	4.98862	2.87364	3.20205	5.01611	3.6046	3.69346	0.476815	2.20517	3.4775	0.0655733	0.506466
CG13021	0	0	0	0	0	0.169038	0	0	0	0	-1.43722	-1.19947	1.58954	0.214162	0.762738
CG13022	3.99376	4.12422	3.75135	2.64501	5.33267	4.0569	3.20205	3.97109	1.94094	3.69346	0.235175	2.19113	0.794907	0.375075	0.917111
CG13023	0.99844	1.62023	1.40676	1.17556	1.54819	1.69038	0.800514	0.418009	1.10911	1.23115	0.373164	0.262667	0.641555	0.425326	0.962458
CG13024	5.49142	8.24843	9.73007	7.34725	7.39692	12.0017	8.00514	8.98719	8.59559	7.38692	-0.226486	2.98261	1.69777	0.196011	0.746845
CG13025	15.4758	12.2254	13.5987	10.8739	11.8695	14.0301	10.6068	8.77819	11.9229	13.2349	0.132058	3.4409	0.513681	0.475466	0.992594
CG13026	6.24025	10.1632	22.1564	8.5228	11.0094	7.26862	8.60552	5.85213	7.48649	8.31028	0.672839	2.83306	5.69241	0.0192034	0.265248
CG13028	0	0.294587	0	0	0	0	0	0	0.277277	0	0.414124	-1.21293	0.140984	0.708857	1
CG13029	0	0	0	0	0	0	0	0	0	0	0	-1.16892	0	1	1
CG13031	0.24961	0	0	0	0.172021	0	0	0	0	0	1.95634	-1.15352	2.57111	0.126964	0.655469
CG13032	0.24961	0.294587	0.11723	0.58778	0	0.845188	0.400257	0	0	0	-0.367024	-0.666681	0.182943	0.670018	1
CG13033	0	0	0	0	0	0	0	0	0.277277	0	-1.48393	-1.1124	1.66149	0.202418	0.748872
CG13038	0	0.147293	0.11723	0.29389	0	0	0	0	0.277277	0.307788	0.151429	-0.731458	0.0210777	0.884937	1
CG13039	0	0	0	0	0	0	0	0	0	0	0	-1.30545	0	1	1
CG1304	0	0	0	0	0	0	0	0	0	0	0	-1.13041	0	1	1
CG13040	0	0	0	0	0	0	0	0	0	0	0	-1.24777	0	1	1
CG13041	0	0.147293	0.23446	0	0	0	0.200128	0	0.277277	0	0.11457	-0.824135	0.0128027	0.910199	1
CG13042	0	0.589174	0	0	0	0.169038	0	0	0	0	1.24219	-0.57349	1.17815	0.280726	0.807515
CG13043	0.49922	1.03105	1.64122	0.881669	1.37617	0.338075	0.600385	0.836018	0.277277	1.23115	0.818082	0.651828	1.63518	0.204382	0.752291
CG13044	0	0.294587	2.93075	0.29389	1.37617	0.507113	0.200128	0.209004	0.277277	0.307788	1.75268	0.296861	4.0908	0.0463303	0.426979
CG13045	0	0	0	0	0	0	0	0	0	0	0	-1.22163	0	1	1
CG13046	3.24493	2.94587	2.22737	0.881669	2.92436	3.04268	1.80116	2.29905	2.21822	2.77009	0.0337656	1.21909	0.0103502	0.9192	1
CG13047	0.24961	0	0.11723	0.29389	0.344043	0	0.200128	0	0	0	1.58184	-0.913246	2.14349	0.152005	0.706791
CG13048	0	0	0	0	0	0	0	0	0	0	0	-1.27753	0	1	1
CG13049	0	0.147293	0.11723	0	0.172021	0.169038	0.200128	0	0	0	0.19001	-0.996379	0.0328165	0.85671	1
CG13050	0	0	0	0	0	0	0	0	0	0	0	-1.29936	0	1	1
CG13051	0.74883	0.883761	0.586149	0	0.344043	0.676151	0.600385	1.04502	0.554554	1.23115	-0.558346	-0.249509	0.82328	0.366724	0.908414
CG13053	0	0.294587	0	0	0	0	0	0	0	0.307788	0.408238	-0.918142	0.10996	0.741024	1
CG13054	1.99688	1.91482	1.87568	1.76334	1.89224	1.3523	3.20205	2.29905	2.4955	1.84673	-0.237056	1.39639	0.597707	0.441546	0.969439
CG13055	3.49454	3.53504	3.39966	3.82057	2.75234	5.4092	4.00257	6.68814	4.43644	6.77134	-0.682785	2.57197	9.35056	0.00296007	0.085074
CG13056	0.74883	0.589174	1.05507	0	0.344043	0.676151	0.800514	0.418009	1.10911	0.923365	-0.356801	0.0565903	0.392746	0.598508	1
CG13058	0.24961	0.147293	0	0.29389	0	0	0	0	0	0.307788	0.943141	-1.05371	0.730399	0.427054	0.962458
CG13059	0	0	0.23446	0	0.172021	0.338075	0	0	0	0	0.184918	-0.93312	0.0313281	0.859962	1
CG13060	0.24961	0	0.11723	0	0	0	0	0	0	0	1.91787	-1.18113	3.01861	0.126964	0.655469
CG13062	0.24961	0.44188	0.11723	0	0.516064	0.507113	0.200128	0.418009	0.831832	0.307788	-0.632552	-0.196052	0.709076	0.402055	0.940979
CG13063	0	0	0.23446	0	0	0	0	0	0	0	1.85129	-1.21183	2.57247	0.126964	0.655469
CG13064	0	0	0	0	0	0	0	0.209004	0	0	-1.45949	-1.25512	1.65311	0.209385	0.756735
CG13065	0	0	0.23446	0	0	0.169038	0.200128	0	0	0	-0.291641	-1.00364	0.0701959	0.814027	1
CG13066	0	0	0.11723	0	0.344043	0	0	0	0	0	2.34717	-1.21547	4.08775	0.0615965	0.489255
CG13067	18.4711	24.598	30.3625	17.3395	22.8789	22.651	22.0141	18.3924	16.9139	25.8542	0.121567	3.99454	0.469714	0.494937	1
CG13068	0.74883	0.736467	0.468919	0.58778	0.860107	0.507113	0.600385	0.836018	1.66366	0.615577	-0.273996	-0.346767	0.236885	0.627686	1
CG13069	0.99844	0.589174	0.468919	1.17556	0.688086	0	0.400257	0	0.277277	0	2.27178	-0.235619	8.11969	0.00546295	0.127426
CG1307	26.4587	27.5439	23.5632	28.8012	29.7597	25.3556	25.8166	25.0805	21.9049	27.0854	0.116066	4.88922	0.838037	0.362484	0.904157
CG13070	0	0	0	0.29389	0	0	0	0	0	0	1.3034	-1.26296	1.29701	0.280509	0.807515
CG13071	10.9828	14.1402	15.1226	13.225	16.8581	15.2134	18.8121	11.4952	13.3093	11.696	-0.00309437	3.35607	0.000267827	0.98698	1
CG13073	0.99844	0	0.703379	0.29389	0	0.169038	0.200128	0.418009	0.831832	0	0.273202	-0.613091	0.121029	0.728759	1
CG13074	0.49922	0.147293	0.23446	0	0	0.507113	0.200128	0.418009	0.277277	0	-0.707324	-0.562265	0.730836	0.394956	0.937107
CG13075	0	0.147293	0.23446	0.881669	0	0	0.200128	0.418009	0	0	0.635853	-0.741611	0.491548	0.508389	1
CG13077	59.9064	45.661	58.3804	52.3124	51.0904	47.1615	46.4298	41.8009	49.6326	38.4735	0.255742	5.35061	4.4254	0.0382887	0.387141
CG13078	0	0	0	0	0	0	0	0	0	0	0	-1.19265	0	1	1
CG13081	0	0	0	0	0	0.169038	0	0	0	0	-1.43791	-0.998734	2.4983	0.200926	0.746845
CG13082	4.9922	5.59715	6.33041	6.17169	5.50469	3.54979	5.20334	3.55308	3.6046	4.92461	0.464084	2.22543	2.61182	0.109684	0.634398
CG13083	0	0	0	0	0	0.169038	0	0	0	0	-1.44809	0.61937	1.06532	0.306508	0.833787
CG13084	0	0	0	0.29389	0.172021	0	0	0.209004	0	0.307788	-0.241987	0.420458	0.0377222	0.846526	1
CG13085	0.49922	0.736467	0.703379	1.17556	0.688086	0.338075	0.400257	1.67204	1.38639	0.923365	-0.287379	0.464311	0.408404	0.550696	1
CG13086	1.24805	2.3567	1.64122	2.05723	4.98862	1.18326	1.00064	7.52416	1.94094	2.46231	-0.175589	2.25365	0.15385	0.69584	1
CG13088	2.4961	4.5661	4.57196	3.23279	3.26841	4.90209	5.40347	3.55308	4.71371	4.30904	-0.302731	2.17693	1.81113	0.190255	0.746845
CG1309	78.128	87.4923	117.347	89.3425	93.7517	87.3925	84.0539	86.1099	86.7878	75.1003	0.154375	6.36573	3.03549	0.0849886	0.557055
CG13090	10.234	9.1322	8.20609	12.9312	9.97724	5.57824	8.80565	7.52416	6.1001	5.84798	0.547331	3.19044	10.4454	0.00173602	0.0583101
CG13091	0	0	0	0	0	0	0	0	0	0	0	-1.13883	0	1	1
CG13096	8.98596	10.016	4.10304	10.8739	8.77309	7.94477	7.20462	11.0772	8.59559	5.2324	0.0479	3.52015	0.0338581	0.854436	1
CG13097	11.2325	11.6362	5.97872	11.4617	9.11714	9.29707	10.0064	7.31516	10.2593	14.7738	-0.0673979	3.64396	0.0762563	0.78309	1
CG13101	10.7332	12.3727	19.6946	8.22891	8.94512	12.0017	12.6081	10.0322	9.98198	6.46355	0.243998	3.27198	1.21843	0.272707	0.807515
CG13102	0	0.147293	0.11723	0	0	0	0	0	0	0	1.87637	-0.893564	2.538	0.126964	0.655469
CG13108	13.2293	15.9077	8.08886	19.1028	21.5027	12.0017	9.60616	11.9133	16.9139	19.0829	0.168938	3.94586	0.730629	0.395023	0.937107
CG1311	44.6802	40.2111	64.7109	40.8507	40.081	47.6686	44.0283	44.0999	33.5505	38.7813	0.149068	5.59418	1.6413	0.203544	0.750427
CG13110	0	0	0	0	0	0	0	0	0	0	0	-1.30545	0	1	1
CG13113	0	0	0	0	0	0	0	0	0	0	0	-1.06921	0	1	1
CG13114	0	0	0.11723	0	0.172021	0	0.200128	0	0.277277	0	-0.291333	-0.444282	0.0474231	0.8282	1
CG13116	23.4633	19.59	28.3696	19.9845	22.7068	22.313	27.0173	20.0644	21.6276	20.9296	0.031414	4.35128	0.0543306	0.816238	1
CG13117	47.6755	51.1108	51.4639	62.0108	60.8956	70.3197	79.6511	59.3573	58.5055	50.4773	-0.227581	5.74924	4.93002	0.0289875	0.333476
CG13123	4.24337	4.27151	3.16521	4.11446	2.92436	3.38075	3.00193	4.18009	3.6046	3.69346	0.0563682	2.02766	0.0491642	0.856593	1
CG13124	429.829	451.16	434.571	393.812	401.154	440.681	442.284	389.375	400.943	485.074	-0.031884	8.60158	0.165972	0.684716	1
CG13126	9.23557	14.5821	13.3642	12.0495	13.0736	13.1849	12.2078	14.4213	10.2593	16.6206	-0.081493	3.68289	0.495692	0.694759	1
CG13127	0	0	0	0	0	0	0	0	0	0	0	-1.30545	0	1	1
CG13131	0	0	0	0	0	0	0	0	0	0	0	-1.28377	0	1	1
CG13133	0.24961	6.7755	0.11723	0	3.61245	0.169038	8.40539	0.209004	3.88188	1.23115	-0.234923	2.83977	0.0841895	0.772387	1
CG13135	0	0	0	0.29389	0	0	0	0	0	0	1.30315	-1.23722	1.38452	0.280509	0.807515
CG13137	0.24961	0.147293	0	0	0	0	0	0	0.277277	0	0.457716	-1.20792	0.177398	0.702588	1
CG13138	0	0	0.11723	0	0	0	0	0	0	0	1.22024	-1.14913	1.4188	0.280509	0.807515
CG1314	0.24961	0	0.11723	0.29389	0.172021	0.169038	0.200128	0	0.277277	0.307788	-0.263517	-1.02484	0.0832902	0.773682	1
CG13142	7.23869	6.03903	8.44055	7.34725	6.70884	9.80418	8.20527	7.73317	8.31832	9.84922	-0.291354	3.14287	2.57856	0.111936	0.640261
CG13144	0.74883	2.2094	0.937839	0.881669	1.89224	2.36653	1.00064	1.25403	0.831832	1.23115	-0.00107973	1.02906	6.26383e-06	0.998009	1
CG13148	6.98908	6.62821	5.27534	9.40447	10.6653	5.57824	9.00578	7.73317	9.98198	11.696	-0.170547	2.91461	0.752963	0.387922	0.929145
CG1315	1.74727	6.03903	1.75845	2.05723	5.33267	5.4092	2.8018	10.0322	3.32733	3.07788	-0.523522	2.82227	1.70746	0.194752	0.746845
CG13151	9.48518	5.30257	3.51689	8.81669	4.8166	4.39498	5.40347	5.22511	4.71371	6.15577	0.25134	2.74104	1.26311	0.378169	0.919751
CG13154	0	0	0	0	0.172021	0	0	0	0	0.615577	-0.968252	-1.02273	0.640269	0.432237	0.962458
CG13155	0	0	0	0	0	0	0	0	0	0	0	-1.21435	0	1	1
CG13157	0	0	0	0	0	0	0	0	0	0	0	-1.30545	0	1	1
CG13159	0	0	0	0	0	0	0	0	0	0	0	-1.11158	0	1	1
CG1316	168.986	189.419	152.75	188.677	200.749	158.895	174.712	174.519	171.912	193.907	0.0436588	7.44342	0.346485	0.557632	1
CG13160	0	0	0	0	0	0	0	0	0	0	0	-1.17032	0	1	1
CG13163	4.9922	7.95385	6.56487	7.93503	9.28916	7.94477	9.80629	7.73317	6.1001	7.38692	-0.0902095	3.11214	0.301614	0.584276	1
CG13168	2.24649	2.79858	1.52399	1.17556	4.30054	2.7046	1.80116	2.09004	2.77277	2.15452	0.0866239	1.40823	0.0725649	0.788275	1
CG1317	263.588	210.188	296.709	231.291	238.422	253.725	238.753	215.066	212.672	203.448	0.141868	7.71275	3.86236	0.0525646	0.456753
CG13170	0.24961	0	0	0	0	0	0.200128	0	0.277277	0	-0.896153	-1.12944	0.640059	0.432237	0.962458
CG13171	0	0	0	0	0	0	0	0	0	0	0	-1.28406	0	1	1
CG13175	0	0	0	0	0	0	0	0	0	0	0	-1.30545	0	1	1
CG13177	0.24961	2.3567	0	0	0	0.169038	0.200128	1.25403	1.94094	4.00125	-1.20284	0.972399	1.28909	0.259327	0.807515
CG13178	1.24805	0.736467	1.05507	1.46945	0.344043	0.507113	0.600385	0.209004	0.831832	0.923365	0.643906	0.821126	1.29396	0.258437	0.807515
CG13183	1.24805	1.76752	0.820609	2.05723	1.37617	1.18326	1.00064	0.627013	1.10911	0.923365	0.533186	0.758494	1.70452	0.200148	0.746845
CG13185	33.6974	30.9316	31.1831	37.0301	24.9431	35.6669	30.8198	38.8748	34.1051	43.7059	-0.218346	5.11366	1.61606	0.207024	0.756586
CG13186	0	0.147293	0	0	0.172021	0	0	0	0	0	1.91278	-1.27663	2.95956	0.126964	0.655469
CG13188	5.99064	3.97692	6.33041	4.40835	4.98862	5.07113	6.00385	5.01611	4.99099	5.2324	-0.0283757	3.11898	0.0193739	0.930773	1
CG1319	21.2169	22.8305	28.4868	25.2745	24.5991	24.5105	28.4182	23.4085	22.4595	23.6997	0.000363601	4.64228	1.06081e-05	0.997409	1
CG13192	14.2278	15.9077	16.2949	12.3434	14.6218	13.523	17.211	10.6592	13.3093	12.9271	0.125911	3.86303	0.756523	0.386808	0.928581
CG13193	0.24961	0.147293	0	0	0	0	0.200128	0	0	0	0.486607	-1.17318	0.190233	0.702588	1
CG13196	0.24961	0	0	0	0	0	0.200128	0	0	0	-0.163047	-1.22705	0.0251348	0.874708	1
CG13197	26.7083	29.0168	33.4105	30.5645	30.4478	36.005	34.0218	35.5308	32.4414	34.4723	-0.197851	5.01902	4.41353	0.0385426	0.387571
CG13198	0	0.294587	0.11723	0	0	0	0	0.209004	0	0.307788	0.121947	-1.11478	0.0167518	0.897457	1
[truncated: 14,728 more rows]
