# Supplementary material for: Experimentally induced active and quiet sleep engage non-overlapping transcriptional programs in Drosophila
Source: bioRxiv preprint, doi:10.1101/2023.04.03.535331, version 3 (2023-10-15)
Supplement: Figure7-source data 4 [file 535331_file22.xlsx]

## Sheet: Signif Opto -ATR 1-10hr
R23E10Gal4 > UASChrimson -ATR (10hours) vs -ATR (1hour)
Downregulated			Upregulated
Gene Name	Log2Fold Change	qFDR	Gene Name	Log2Fold Change	qFDR
CG9826	-5.8243	0.0011	RpS8	0.5812	0.0243
CG12506	-5.6505	0.025	CG33695	0.5813	0.0388
CecA1	-5.1235	0.0151	cyp33	0.5826	0.0179
CecC	-4.9677	0.0026	M1BP	0.5853	0.0023
CG43094	-4.9526	0.0014	Cnx99A	0.586	0
CecB	-4.7672	0.0106	CG8635	0.5862	0.0345
mir-929	-4.1769	0.0218	CG8468	0.5864	0.0002
AttD	-4.0908	0.0257	CG3570	0.5868	0.0454
CG15020	-3.8285	0.0264	CG13108	0.587	0.0472
CR45662	-3.8161	0.0346	D1	0.5873	0.0066
CR44636	-3.8042	0.0471	RpL35	0.5891	0.0123
CR45273	-3.6959	0.0054	RpS18	0.5892	0.0071
CR45712	-3.6132	0.0434	CG5789	0.5904	0
Spn75F	-3.6124	0.0445	Ssk	0.5906	0.0121
mir-998	-3.1776	0.0361	l(3)j2D3	0.5908	0.0051
Osi6	-2.9728	0.0474	l(3)neo43	0.5915	0.0426
Ugt86De	-2.8293	0	RpS30	0.5915	0.0029
snoRNA:Psi28S-3186	-2.2835	0.0159	eIF2B-delta	0.5941	0.0103
CR43956	-2.2714	0.0121	CG8490	0.5956	0.0379
CG34180	-1.9693	0	CG9629	0.5968	0.015
scpr-C	-1.754	0.0274	CG15704	0.5968	0.0185
CG44195	-1.6696	0.0007	CG14141	0.5974	0.0014
Clk	-1.5937	0	mRpS26	0.5977	0.0159
CG40198	-1.557	0.0014	CG11191	0.5996	0.0038
CG14304	-1.5405	0.0007	Zif	0.6007	0.0054
Cyp312a1	-1.5112	0.0013	CG14341	0.6026	0.007
Gr10a	-1.4709	0.0316	Rpi	0.6027	0.0363
Jhe	-1.4695	0.0092	CG14229	0.6035	0.0078
CG34265	-1.3936	0.0019	l(2)not	0.6047	0.0031
CR44120	-1.3538	0.0003	RpS9	0.6049	0.0137
Hr38	-1.3402	0	Bmcp	0.6079	0.0002
Cpr76Bd	-1.3344	0.0154	CG6695	0.608	0.0111
CG17324	-1.3239	0	RpS23	0.6086	0.0164
CG42269	-1.3225	0.001	RpL19	0.611	0.0223
CR45014	-1.3222	0.0241	beag	0.6111	0.0062
Ugt35b	-1.3091	0	RpL17	0.6111	0.0154
CG44006	-1.3086	0.026	RpL31	0.6124	0.009
CG14257	-1.2859	0.0017	Taf10	0.613	0.0251
Cyp6a21	-1.2761	0.0001	CG18136	0.6135	0.0372
CG31189	-1.2725	0	noe	0.6137	0.0024
mir-281-1	-1.2306	0.0026	CG14270	0.6142	0.0015
CG17715	-1.1791	0.028	CG1142	0.6147	0.0302
CG13796	-1.1626	0.0006	RpL32	0.6155	0.0289
Est-6	-1.1619	0.0017	RpL6	0.6155	0.0145
CG32645	-1.1563	0.0002	Rh6	0.616	0
CG9512	-1.1562	0.0093	Ssb-c31a	0.6168	0.008
b6	-1.1513	0.013	CG32537	0.618	0.0184
CG31205	-1.1503	0.0008	RpLP2	0.6203	0.0155
CR43480	-1.1378	0	maf-S	0.6206	0.0276
CG11458	-1.1352	0.0129	TfIIEalpha	0.6219	0.0125
CBP	-1.1323	0.0432	CG16787	0.626	0.007
Ugt86Da	-1.1255	0	eIF-2beta	0.6268	0.0006
CR45176	-1.1198	0.0431	RpL13	0.6269	0.0023
CG43800	-1.1177	0.0226	NC2beta	0.627	0.0294
CG10553	-1.1063	0.0021	Map60	0.629	0.0246
CG13101	-1.1056	0.0009	Mat1	0.6296	0.0123
ppk26	-1.0982	0.0106	CG17202	0.6301	0.0279
CR44946	-1.0953	0.0014	RpL28	0.6313	0.0015
Cyp4aa1	-1.0695	0.0001	Brms1	0.6337	0.0006
ple	-1.0505	0	boca	0.634	0.0045
CG14636	-1.0359	0.0169	RpS25	0.6349	0.0102
CG8170	-1.0344	0.0178	Capr	0.6404	0.0008
CG11796	-1.0313	0.0036	Ppat-Dpck	0.6406	0.0005
CR45758	-1.0296	0.0203	Pdp1	0.6457	0
CG30438	-1.0283	0.002	bor	0.6473	0
spz3	-1.0246	0.0026	RpL24-like	0.6492	0.0008
RpL38	-1.0234	0	DMAP1	0.6518	0.001
Ugt35a	-1.022	0	Membrin	0.6536	0.0249
Cpr72Ec	-1.0158	0.0038	pen	0.6536	0.0188
gk	-1.0121	0.0007	CG4709	0.6539	0.036
pncr004:X	-0.9924	0.0224	CG11695	0.6562	0.0064
CG10513	-0.9866	0	CG10494	0.659	0.0263
CG11407	-0.9748	0	CG31223	0.6602	0.0433
Uhg1	-0.9664	0.0049	CG5886	0.6623	0.0375
GstD10	-0.9602	0.024	Aats-val	0.6624	0
Pdh	-0.9567	0	Sobp	0.6636	0.009
CG31321	-0.9371	0.0001	nAChRbeta3	0.6638	0.0342
CR44121	-0.9362	0.0069	CG14880	0.6642	0.0003
CG42392	-0.9312	0.0099	CG14523	0.666	0.0274
CG11374	-0.9269	0.0178	CG31706	0.6671	0
CG42368	-0.9216	0	vls	0.6673	0.0476
pncr013:4	-0.9207	0.0276	CG7172	0.6683	0.0289
Gasp	-0.9198	0.0002	O-fut2	0.6697	0.015
CG7079	-0.9197	0.0001	CG13993	0.6699	0.0195
CG40472	-0.9194	0.0363	Cypl	0.6711	0.048
CG40178	-0.9069	0.001	Dpit47	0.6722	0.0225
CG41343	-0.9065	0.0101	bcn92	0.6729	0.0046
zye	-0.901	0.0467	A16	0.676	0.0131
msi	-0.8966	0.001	CG2972	0.6809	0.0352
CG40127	-0.895	0.0022	tsu	0.682	0.0204
CG4455	-0.8938	0.0115	CG7824	0.6886	0.0184
CG17724	-0.8892	0.0005	CG3918	0.6922	0.0399
CG4928	-0.8884	0.0003	BCAS2	0.6934	0.0274
CR43957	-0.8868	0.0379	CG7280	0.6968	0.02
CG8757	-0.8782	0.0159	CG1665	0.6976	0.0123
CG17883	-0.8757	0.0016	Aats-glupro	0.6999	0
CG42562	-0.8692	0.0276	SmE	0.7005	0.0008
Alg-2	-0.8688	0.001	CG30109	0.7006	0.0018
CG3107	-0.863	0.0005	CG6693	0.7019	0.0038
CR44922	-0.8587	0.0022	dnr1	0.7021	0
CG9935	-0.8419	0.0002	CG3773	0.7024	0.0214
Nha1	-0.8394	0.0064	Uhg2	0.7047	0.001
CR45409	-0.8388	0.0105	CG13364	0.7051	0.0167
Sclp	-0.8339	0.0026	hng1	0.7057	0.0085
Atf6	-0.8335	0.0021	dgt2	0.7058	0.0105
CG9498	-0.8331	0.0029	Vps20	0.7072	0.0309
CG9990	-0.8155	0	CG10268	0.7077	0.0053
CG31207	-0.8122	0	CG7685	0.708	0.0103
MED26	-0.8105	0.0003	CG6013	0.7086	0.0302
Osi24	-0.8098	0.0388	Dysb	0.717	0.0184
Stlk	-0.8091	0.0152	CG15666	0.721	0.0184
gb	-0.8086	0	regucalcin	0.7239	0.0006
CG32000	-0.8053	0.0004	mino	0.7291	0.0005
Or45b	-0.8044	0.0415	CG13901	0.7294	0.0086
CR44029	-0.8028	0.0288	CG13751	0.7358	0.0033
CG1136	-0.7983	0.0001	Sas10	0.7403	0.0367
CG16959	-0.7967	0.0004	CG1703	0.745	0.0067
CG9416	-0.7942	0.001	CG11504	0.7545	0.0018
CG33978	-0.7912	0.0033	CG15343	0.7579	0.0431
Nipped-B	-0.7884	0.0011	CG13807	0.7615	0.0063
Adgf-A	-0.7884	0.0046	CG9922	0.7625	0.032
CR44662	-0.7855	0.046	CG31710	0.7666	0.0006
mbl	-0.7827	0.0001	CG43222	0.7722	0.0015
verm	-0.7827	0.005	P32	0.7726	0
CG17514	-0.7823	0.0007	CG14480	0.7742	0.0027
fw	-0.7797	0	CG18731	0.7752	0.0019
CG31871	-0.7775	0.0036	CG16865	0.777	0.016
hdly	-0.7731	0.0302	CG12391	0.7775	0.0138
p120ctn	-0.7727	0.0003	CG7509	0.789	0.0215
CR44754	-0.7724	0.0417	CG14855	0.7948	0.0071
CG5945	-0.7587	0.0009	CG4291	0.7962	0.0106
CG42246	-0.7581	0.0441	CG9507	0.7984	0
Cals	-0.7552	0.005	RpL36A	0.7992	0.0294
Cyp6a23	-0.7531	0.0003	Dgp-1	0.8007	0
CG31103	-0.748	0.0005	trbl	0.8011	0
Nipped-A	-0.7444	0.0016	Aats-his	0.8089	0
CG10176	-0.7439	0.0078	CG14864	0.8114	0.0218
CG43092	-0.7435	0.0002	CG9213	0.8207	0.016
CG11155	-0.7416	0.0009	Hrs	0.8221	0
Dip-B	-0.7368	0	CG6745	0.8248	0.0271
CG11170	-0.7364	0.0245	CG33123	0.8281	0
CG10348	-0.7355	0.0425	bnb	0.8313	0
CG2316	-0.733	0.0007	CG12848	0.8371	0
CG41099	-0.7262	0.0001	Rrp45	0.8436	0.0377
CG11686	-0.7229	0.0062	CG10131	0.8489	0.0051
serp	-0.7204	0.0249	Hmg-2	0.8526	0.0007
CG7724	-0.7139	0.0066	Rlb1	0.8543	0.0103
CG17486	-0.7134	0.0005	mia	0.8608	0.0001
sxc	-0.7104	0.0003	CG12239	0.8653	0.0445
conv	-0.7089	0.0274	Mfap1	0.8665	0.0041
Eph	-0.7087	0.0004	Aats-asn	0.8677	0
Cyp4e2	-0.7085	0.0057	Myo28B1	0.8792	0
CG40470	-0.7079	0.0225	CG31324	0.882	0
Cpr67B	-0.6979	0	cwo	0.8834	0
CG31300	-0.6968	0.0045	Mis12	0.8875	0.0105
Cyp317a1	-0.6966	0.0066	CG1542	0.9003	0.0109
CG5262	-0.6964	0.0113	Slob	0.9048	0
RhoGAP102A	-0.695	0.0036	CG9505	0.9155	0
myo	-0.693	0.0041	Sem1	0.9207	0.0031
Maf1	-0.6917	0.0017	CG4813	0.9268	0.0025
CanA1	-0.691	0.0006	CG11858	0.9343	0.0021
Zip102B	-0.6895	0.0015	Upf3	0.9439	0.0174
CG33521	-0.6867	0.0079	CG32409	0.9487	0.034
CG7300	-0.686	0.0257	CG6999	0.9542	0.0036
CR45007	-0.6852	0.0346	CG17361	0.9696	0.0294
CG14661	-0.6843	0.0026	TfIIFalpha	0.9709	0.0159
CG10062	-0.6843	0.0027	CG5646	0.9792	0
cta	-0.6841	0.0113	MED4	0.9841	0.0006
MFS17	-0.6835	0.0314	wibg	0.9841	0.0013
CG34120	-0.6809	0.0006	CG10361	1.0126	0.0135
CG32121	-0.6808	0.0225	Gclm	1.025	0
CG32369	-0.6801	0	CG14221	1.034	0.0009
pho	-0.68	0.0029	CG11425	1.056	0.0046
CrebA	-0.6776	0.0284	Mco1	1.0581	0.0042
qsm	-0.6748	0	CG33332	1.0604	0.0297
CG5783	-0.674	0.0044	CG11808	1.0649	0.0142
CG33229	-0.6736	0	CG9760	1.0649	0
SP1173	-0.6732	0	CG31381	1.0675	0.0103
CG7402	-0.6731	0.0462	CG9759	1.0682	0.0033
CG9521	-0.671	0.0184	CG15877	1.0934	0.0346
CG14253	-0.6704	0.0017	CG8021	1.0953	0.0011
fuss	-0.6659	0.0011	CG1789	1.1062	0.0014
SLC5A11	-0.6656	0.0001	gol	1.1397	0
Fmo-2	-0.6586	0.0289	CG9305	1.1582	0
CG3812	-0.6572	0.0028	CG2681	1.1632	0
dp	-0.6571	0.0318	CG6808	1.1924	0
CG9649	-0.657	0.0179	CG10505	1.1926	0.0373
rl	-0.6552	0.0155	Nmdmc	1.1979	0
Sp212	-0.6543	0.0138	Obp44a	1.1999	0
CG15279	-0.6542	0.0008	CR43432	1.2255	0.0476
cold	-0.6537	0.0067	snoRNA:Psi18S-531	1.2382	0.0323
GstZ2	-0.6529	0.0006	Cwc25	1.2712	0.0247
CG43093	-0.6504	0.0273	Lsm10	1.3199	0.0289
CG1674	-0.6502	0.0055	CG31918	1.4047	0
CG4168	-0.6501	0	RNaseP:RNA	1.4176	0.0289
CG14153	-0.6498	0.015	CG13936	1.4214	0.0141
CG13305	-0.6491	0.0151	Obp56a	1.4892	0.0103
CG32816	-0.6445	0.0216	CG42237	1.5025	0.0342
CG12567	-0.6425	0.0034	CG11437	1.526	0.0056
Nlg1	-0.6421	0.0113	CG12470	1.5673	0.0361
IntS3	-0.6384	0.0012	Ubpy	1.8911	0
uex	-0.6376	0.0042	CG2556	1.9692	0
l(2)41Ab	-0.6371	0.0415	scaRNA:MeU5-C46	2.0378	0.0263
CG1213	-0.6366	0.001	snRNA:U2:34ABa	2.0964	0.0433
CG31808	-0.6363	0.0005	CG11449	2.3569	0
PlexB	-0.635	0.0081	vri	2.3694	0
CG9628	-0.6347	0.0001	dy	2.3932	0.0001
ft	-0.6337	0.0285	Obp99a	2.4609	0.0059
Ir76b	-0.6319	0.0397	snRNA:U11	2.586	0.047
Mitf	-0.6279	0.0015	snoRNA:Psi28S-3436b	2.6428	0.0225
CG15211	-0.6274	0.0008	snRNA:7SK	2.6598	0.0355
CG4239	-0.6252	0.0037	tim	2.6763	0
spz5	-0.6248	0.028	snRNA:U12:73B	2.7356	0.0257
bru-2	-0.6239	0.0005	Cyp4g1	3.0867	0.045
sky	-0.6215	0.0064	snoRNA:Psi28S-291	3.0946	0.0113
CHKov2	-0.6207	0.0002	snoRNA:Psi28S-2626	3.1388	0.0497
Tango6	-0.6164	0.0022	per	3.1887	0
vtd	-0.613	0.0019	CG31954	3.2109	0.0096
lt	-0.6111	0.001	snRNA:U1:95Cc	3.3062	0.0379
CG17691	-0.6098	0.0003	CR44470	3.321	0.0007
CG43324	-0.6096	0.0078	snoRNA:Psi28S-2876	3.3565	0.049
CG8008	-0.6094	0.0012	Cpr49Ab	3.458	0.0419
CG40006	-0.6082	0.0288	snoRNA:Psi28S-2622	3.5082	0.0327
l(2)gl	-0.6072	0.0086	snoRNA:185	3.6032	0.0342
Kr-h1	-0.6066	0.0013	snoRNA:Psi28S-3308	3.6196	0.0268
GluRIID	-0.6066	0.0175	snoRNA:Psi18S-1389b	3.8004	0.0445
nAChRalpha4	-0.6063	0.0121	CR45740	3.8173	0.0281
jbug	-0.6042	0	snRNA:U2:14B	3.8221	0.048
Parp	-0.6039	0.0229	unsRNA:CG10576-a	3.8261	0.0288
Obp57b	-0.6035	0.0256	Prosbeta2R2	3.8419	0.0433
MsR1	-0.6033	0.0211	CR45299	4.0305	0.0462
CG30419	-0.6021	0.0002	snoRNA:CG32479-b	4.0561	0.0192
Cyp4ac3	-0.6018	0.0216	CG14191	4.0613	0.0038
CG7510	-0.601	0	CG6059	4.1764	0.013
FoxP	-0.6003	0.0071	CG13215	4.2096	0.023
CG42596	-0.5999	0.0045	cyr	4.2283	0
CG9850	-0.5996	0.0125	snoRNA:Psi18S-1377d	4.4408	0.028
bt	-0.5969	0.0121	snoRNA:Psi28S-3316a	4.688	0.0259
Pten	-0.596	0.0121	Mur18B	4.8012	0.0025
Cyp6a20	-0.5949	0.0049	snoRNA:Psi28S-3405b	5.0186	0.0112
ort	-0.5926	0.0009	Jon74E	5.1692	0.0489
dpp	-0.5901	0.0003	salt	5.3771	0.0384
CG40160	-0.5898	0.0099	CG18180	5.4199	0.0415
Ank	-0.5896	0.0004	5.8SrRNA:CR40454	5.7078	0.0078
CG7713	-0.588	0.0465	Cp36	5.7777	0.0318
ci	-0.5878	0.0035	Jon25Bi	6.0786	0.0434
CG13833	-0.5865	0.028	Jon25Bii	6.1222	0.0218
CG10175	-0.5862	0.0113	Bace	6.1703	0.0095
CG32694	-0.585	0.0024	CG12374	6.3962	0.024
Snmp2	-0.5822	0.0037	Jon65Aiv	7.5471	0.0373
lap	-0.5803	0.0014	alphaTry	8.7168	0.0269
			betaTry	8.9248	0.0268

## Sheet: All genes
Row.names	dm14_1	dm14_2	dm14_3	dm14_4	dm14_5	dm16_1	dm16_2	dm16_3	dm16_4	dm16_5	logFC	logCPM	F	PValue	FDR
128up	16.7095	21.1992	18.506	25.2889	21.8185	26.0345	26.7594	25.7779	21.96	21.4385	-0.232	4.49957	3.63337	0.0599268	0.258883
140up	15.9613	14.9093	13.8179	12.4337	18.2666	14.5793	16.0991	16.0095	13.4343	17.71	-0.0528785	3.85757	0.172762	0.67869	1
14-3-3epsilon	420.232	503.423	573.194	523.48	542.418	485.023	588.706	576.883	480.536	546.028	-0.0631039	9.19045	0.572628	0.451257	0.821257
14-3-3zeta	1375.17	1477.42	1471.6	1449.69	1618.88	1304.33	1794.62	1575.44	1307.26	1517.1	-0.0206064	10.6062	0.0769702	0.782103	1
18w	35.913	40.3018	36.0251	46.363	42.8759	50.7673	24.8014	42.8728	49.087	30.5731	0.0330692	5.44024	0.0623318	0.803435	1
26-29-p	71.5766	74.0808	79.9461	84.7178	81.9462	85.9138	92.0261	74.6204	82.4145	90.9736	-0.119768	6.83069	0.67151	0.41476	0.777773
2mit	144.65	154.684	141.88	148.151	158.818	133.297	90.7208	126.99	144.161	145.782	0.22329	7.24247	6.29213	0.0139783	0.105479
312	17.7071	11.415	14.3113	11.5907	16.237	16.9224	20.4502	16.8235	13.951	14.168	-0.211639	3.92417	2.87275	0.0936604	0.34456
4EHP	151.882	157.247	150.022	164.378	180.383	116.374	118.35	170.134	129.693	152.866	0.225824	7.43629	5.00744	0.0277878	0.161055
4E-T	148.391	140.474	119.426	132.134	145.372	86.1742	93.3314	95.5141	124.009	102.159	0.452257	6.98591	17.9689	5.56359e-05	0.00254268
5.8SrRNA:CR40454	15.4625	7.92059	2.96097	5.69	3.29814	422.54	8.26712	8.6831	1405.96	6.89759	-5.70776	5.96192	14.3818	0.000274544	0.00778354
5-HT1A	59.855	62.8988	58.9726	65.3296	71.0369	62.2224	33.7211	62.1384	62.7797	63.3833	0.163972	6.06899	3.16832	0.0785643	0.30994
5-HT1B	37.16	34.2449	30.1032	39.1978	41.3536	32.5431	27.1945	35.2751	30.2273	28.7089	0.245115	5.22628	5.13169	0.025971	0.153906
5-HT2A	113.974	134.883	109.556	109.796	138.015	129.131	98.9879	104.197	135.377	125.834	0.0303774	6.94023	0.105231	0.746417	1
5-HT2B	34.9154	31.4494	26.402	27.8178	34.25	24.9931	18.9274	30.9335	33.0692	27.7768	0.19237	4.83607	2.41206	0.124027	0.404785
5-HT7	34.1672	37.2734	30.5967	30.9789	37.0407	25.2535	22.4082	30.1195	27.3854	31.6916	0.311595	4.86802	8.93719	0.00363063	0.0428882
5PtaseI	90.7801	88.2913	87.5953	84.2963	102.496	70.5535	93.549	90.0871	93.5237	81.6526	0.0783123	6.45989	1.34513	0.249298	0.569284
5SrRNA:CR33353	0	0	0	0	0	0	0	0	0	0	0	-1.30545	0	1	1
5SrRNA:CR33354	0	0	0	0	0	0	0	0	0	0	0	-1.30545	0	1	1
5SrRNA:CR33355	0	0	0	0	0	0	0	0	0	0	0	-1.30545	0	1	1
5SrRNA:CR33357	0	0	0	0	0	0	0	0	0	0	0	-1.30545	0	1	1
5SrRNA:CR33358	0	0	0	0	0	0	0	0	0	0	0	-1.30545	0	1	1
5SrRNA:CR33359	0	0	0	0	0	0	0	0	0	0	0	-1.30545	0	1	1
5SrRNA:CR33360	0	0	0	0	0	0	0	0	0	0	0	-1.30545	0	1	1
5SrRNA:CR33361	0	0	0	0	0	0	0	0	0	0	0	-1.30545	0	1	1
5SrRNA:CR33362	0	0	0	0	0	0	0	0	0	0	0	-1.30545	0	1	1
5SrRNA:CR33364	0	0	0	0	0	0	0	0	0	0	0	-1.30545	0	1	1
5SrRNA:CR33365	0	0	0	0	0	0	0	0	0	0	0	-1.30545	0	1	1
5SrRNA:CR33366	0	0	0	0	0	0	0	0	0	0	0	-1.30545	0	1	1
5SrRNA:CR33367	0	0	0	0	0	1.04138	0	0	1.03341	0	-4.04105	-1.06526	8.29371	0.00565317	0.0575536
5SrRNA:CR33368	0	0	0	0	0	0	0	0	0	0	0	-1.30545	0	1	1
5SrRNA:CR33369	0	0	0	0	0	0	0	0	0	0	0	-1.30545	0	1	1
5SrRNA:CR33370	0	0	0	0	0	0	0	0	0	0	0	-1.30545	0	1	1
5SrRNA:CR33372	0	0	0	0	0	0	0	0	0	0	0	-1.30545	0	1	1
5SrRNA:CR33373	0	0	0	0	0	0	0	0	0	0	0	-1.30545	0	1	1
5SrRNA:CR33374	0	0	0	0	0	0	0	0	0	0	0	-1.30545	0	1	1
5SrRNA:CR33375	0	0	0	0	0	0	0	0	0	0	0	-1.30545	0	1	1
5SrRNA:CR33376	0	0	0	0	0	0	0	0	0	0	0	-1.30545	0	1	1
5SrRNA:CR33377	0	0	0	0	0	0	0	0	0	0	0	-1.30545	0	1	1
5SrRNA:CR33378	0	0	0	0	0	0	0	0	0	0	0	-1.30545	0	1	1
5SrRNA:CR33379	0	0	0	0	0	0	0	0	0	0	0	-1.30545	0	1	1
5SrRNA:CR33380	0	0	0	0	0	0	0	0	0	0	0	-1.30545	0	1	1
5SrRNA:CR33381	0	0	0	0	0	0	0	0	0	0	0	-1.30545	0	1	1
5SrRNA:CR33382	0	0	0	0	0	0	0	0	0	0	0	-1.30545	0	1	1
5SrRNA:CR33383	0	0	0	0	0	0	0	0	0	0	0	-1.30545	0	1	1
5SrRNA:CR33384	0	0	0	0	0	0	0	0	0	0	0	-1.30545	0	1	1
5SrRNA:CR33385	0	0	0	0	0	0	0	0	0	0	0	-1.30545	0	1	1
5SrRNA:CR33386	0	0	0	0	0	0	0	0	0	0	0	-1.30545	0	1	1
5SrRNA:CR33387	0	0	0	0	0	0	0	0	0	0	0	-1.30545	0	1	1
5SrRNA:CR33388	0	0	0	0	0	0	0	0	0	0	0	-1.30545	0	1	1
5SrRNA:CR33389	0	0	0	0	0	0	0	0	0	0	0	-1.30545	0	1	1
5SrRNA:CR33390	0	0	0	0	0	0	0	0	0	0	0	-1.30545	0	1	1
5SrRNA:CR33391	0	0	0	0	0	0	0	0	0	0	0	-1.30545	0	1	1
5SrRNA:CR33392	0	0	0	0	0	0	0	0	0	0	0	-1.30545	0	1	1
5SrRNA:CR33393	0	0	0	0	0	0	0	0	0	0	0	-1.30545	0	1	1
5SrRNA:CR33394	0	0	0	0	0	0	0	0	0	0	0	-1.30545	0	1	1
5SrRNA:CR33395	0	0	0	0	0	0	0	0	0	0	0	-1.30545	0	1	1
5SrRNA:CR33396	0	0	0	0	0	0	0	0	0	0	0	-1.30545	0	1	1
5SrRNA:CR33397	0	0	0	0	0	0	0	0	0	0	0	-1.30545	0	1	1
5SrRNA:CR33398	0	0	0	0	0	0	0	0	0	0	0	-1.30545	0	1	1
5SrRNA:CR33399	0	0	0	0	0	0	0	0	0	0	0	-1.30545	0	1	1
5SrRNA:CR33400	0	0	0	0	0	0	0	0	0	0	0	-1.30545	0	1	1
5SrRNA:CR33401	0	0	0	0	0	0	0	0	0	0	0	-1.30545	0	1	1
5SrRNA:CR33402	0	0	0	0	0	0	0	0	0	0	0	-1.30545	0	1	1
5SrRNA:CR33403	0	0	0	0	0	0	0	0	0	0	0	-1.30545	0	1	1
5SrRNA:CR33404	0	0	0	0	0	0	0	0	0	0	0	-1.30545	0	1	1
5SrRNA:CR33405	0	0	0	0	0	0	0	0	0	0	0	-1.30545	0	1	1
5SrRNA:CR33406	0	0	0	0	0	0	0	0	0	0	0	-1.30545	0	1	1
5SrRNA:CR33407	0	0	0	0	0	0	0	0	0	0	0	-1.30545	0	1	1
5SrRNA:CR33408	0	0	0	0	0	0	0	0	0	0	0	-1.30545	0	1	1
5SrRNA:CR33409	0	0	0	0	0	0	0	0	0	0	0	-1.30545	0	1	1
5SrRNA:CR33410	0	0	0	0	0	0	0	0	0	0	0	-1.30545	0	1	1
5SrRNA:CR33411	0	0	0	0	0	0	0	0	0	0	0	-1.30545	0	1	1
5SrRNA:CR33412	0	0	0	0	0	0	0	0	0	0	0	-1.30545	0	1	1
5SrRNA:CR33413	0	0	0	0	0	0	0	0	0	0	0	-1.30545	0	1	1
5SrRNA:CR33414	0	0	0	0	0	0	0	0	0	0	0	-1.30545	0	1	1
5SrRNA:CR33415	0	0	0	0	0	0	0	0	0	0	0	-1.30545	0	1	1
5SrRNA:CR33417	0	0	0	0	0	0	0	0	0	0	0	-1.30545	0	1	1
5SrRNA:CR33418	0	0	0	0	0	0	0	0	0	0	0	-1.30545	0	1	1
5SrRNA:CR33419	0	0	0	0	0	0	0	0	0	0	0	-1.30545	0	1	1
5SrRNA:CR33420	0	0	0	0	0	0	0	0	0	0	0	-1.30545	0	1	1
5SrRNA:CR33421	0	0	0	0	0	0	0	0	0	0	0	-1.30545	0	1	1
5SrRNA:CR33422	0	0	0	0	0	0	0	0	0	0	0	-1.30545	0	1	1
5SrRNA:CR33423	0	0	0	0	0	0	0	0	0	0	0	-1.30545	0	1	1
5SrRNA:CR33424	0	0	0	0	0	0	0	0	0	0	0	-1.30545	0	1	1
5SrRNA:CR33425	0	0	0	0	0	0	0	0	0	0	0	-1.30545	0	1	1
5SrRNA:CR33426	0	0	0	0	0	0	0	0	0	0	0	-1.30545	0	1	1
5SrRNA:CR33427	0	0	0	0	0	0	0	0	0	0	0	-1.30545	0	1	1
5SrRNA:CR33428	0	0	0	0	0	0	0	0	0.258353	0	-1.52242	-1.21544	1.59076	0.241564	0.559103
5SrRNA:CR33429	0	0	0	0	0	0	0	0	0	0	0	-1.30545	0	1	1
5SrRNA:CR33430	0	0	0	0	0	0	0	0	0	0	0	-1.30545	0	1	1
5SrRNA:CR33431	0	0	0	0	0	0	0	0	0	0	0	-1.30545	0	1	1
5SrRNA:CR33432	0	0	0	0	0	0	0	0	0	0	0	-1.30545	0	1	1
5SrRNA:CR33433	0	0	0	0	0	0	0	0	0	0	0	-1.30545	0	1	1
5SrRNA:CR33434	0	0	0	0	0	0	0	0	0	0	0	-1.30545	0	1	1
5SrRNA:CR33435	0	0	0	0	0	0	0	0	0	0	0	-1.30545	0	1	1
5SrRNA:CR33436	0	0	0	0	0	0	0	0	0	0	0	-1.30545	0	1	1
5SrRNA:CR33437	0	0	0	0	0	0	0	0	0	0	0	-1.30545	0	1	1
5SrRNA:CR33438	0	0	0	0	0	0	0	0	0	0	0	-1.30545	0	1	1
5SrRNA:CR33439	0	0	0	0	0	0	0	0	0	0	0	-1.30545	0	1	1
5SrRNA:CR33440	0	0	0	0	0	0	0	0	0	0	0	-1.30545	0	1	1
5SrRNA:CR33441	0	0	0	0	0	0	0	0	0	0	0	-1.30545	0	1	1
5SrRNA:CR33442	0	0	0	0	0	0	0	0	0	0	0	-1.30545	0	1	1
5SrRNA:CR33443	0	0	0	0	0	0	0	0	0	0	0	-1.30545	0	1	1
5SrRNA:CR33444	0	0	0	0	0	0	0	0	0	0	0	-1.30545	0	1	1
5SrRNA:CR33445	0	0	0	0	0	0	0	0	0	0	0	-1.30545	0	1	1
5SrRNA:CR33446	0	0	0	0	0	0	0	0	0	0	0	-1.30545	0	1	1
5SrRNA:CR33447	0	0	0	0	0	0	0	0	0	0	0	-1.30545	0	1	1
5SrRNA:CR33448	0	0	0	0	0	0	0	0	0	0	0	-1.30545	0	1	1
5SrRNA:CR33449	0	0	0	0	0	0	0	0	0	0	0	-1.30545	0	1	1
5SrRNA:CR33450	0	0	0	0	0	0	0	0	0	0	0	-1.30545	0	1	1
5SrRNA:CR33451	0	0	0	0	0	0	0	0	0	0	0	-1.30545	0	1	1
5SrRNA:CR33452	0	0	0	0	0	0	0	0	0	0	0	-1.29802	0	1	1
5SrRNA-Psi:CR33356	0	0	0	0	0	0	0	0	0	0	0	-1.30545	0	1	1
5SrRNA-Psi:CR33363	0	0	0.246747	0	0.253703	1.04138	0	0	1.03341	0	-1.78039	-0.868537	2.01576	0.159807	0.476062
5SrRNA-Psi:CR33371	0	0	0	0	0	0	0	0	0	0	0	-1.30545	0	1	1
5SrRNA-Psi:CR33416	0	0	0	0	0	0	0	0	0	0	0	-1.30545	0	1	1
7B2	437.69	424.45	426.626	414.106	385.629	499.602	588.271	505.248	450.051	525.149	-0.298508	8.70109	14.0275	0.000322749	0.00879255
7SLRNA:CR32864	0	0	0	0	0	0	0	0	0	0	0	-1.30545	0	1	1
7SLRNA:CR42652	0	0	0	0	0	0	0	0	0	0	0	-1.30545	0	1	1
825-Oak	0	0	0	0	0	0	0	0	0	0	0	-1.27624	0	1	1
a	25.6878	30.5176	31.0902	37.0904	32.474	38.0104	28.9349	41.7874	36.9444	37.2843	-0.218137	5.16355	4.82391	0.0307218	0.171925
a10	0.997584	9.31834	0.246747	0	0	0	0.217556	0.542694	0	0.186421	3.34418	4.14282	0.92263	0.339442	0.687474
A16	7.73127	12.5798	18.2593	14.1196	14.4611	20.5672	24.1487	21.1651	21.1849	20.3199	-0.676043	4.08445	12.7012	0.000595508	0.0131067
A2bp1	229.694	236.686	209.982	243.827	289.222	196.56	156.423	222.776	226.834	228.18	0.230664	8.08675	2.97363	0.088176	0.335285
a5	0	4.19325	0	0	0	0.260345	0	0	0	0	3.60336	2.31086	1.00215	0.319694	0.662069
a6	17.4577	19.5685	17.2723	16.8593	21.0574	18.4845	19.1449	22.5218	20.4099	20.8792	-0.137996	4.12068	1.35173	0.248149	0.567978
Aac11	258.873	287.238	305.72	278.599	312.309	312.414	301.75	319.647	292.197	300.698	-0.0815839	8.32881	1.44447	0.232672	0.559103
Aatf	4.73852	5.82396	10.8569	10.3263	6.34258	10.9345	9.57246	11.9393	9.3007	11.931	-0.488483	3.48866	5.16655	0.0254843	0.152392
Aats-ala	36.4118	46.8247	43.921	54.3711	42.1148	66.9086	59.6103	62.6811	70.272	68.7895	-0.551426	5.90138	32.7562	1.45068e-07	2.85477e-05
Aats-ala-m	21.6974	20.7333	22.454	23.1815	19.0278	22.9103	23.2785	23.8785	21.96	25.9126	-0.139931	4.61228	1.8671	0.175321	0.504685
Aats-arg	19.4529	21.4322	23.9345	27.607	22.0722	23.1707	21.7556	20.6224	22.9934	20.8792	0.068436	4.53628	0.357684	0.551346	0.924495
Aats-asn	57.1117	65.9273	82.9071	84.2963	70.7832	147.616	131.186	120.207	126.335	133.851	-0.867706	6.68002	56.618	4.48874e-11	2.50277e-08
Aats-asp	43.1455	48.2224	44.6613	56.057	45.9203	58.5776	56.347	49.6565	67.1717	54.0622	-0.262029	5.76218	6.44188	0.0129228	0.100165
Aats-cys	21.6974	17.7048	24.6747	21.917	16.7444	28.3776	27.1945	23.0645	28.4188	31.5052	-0.433578	4.79195	15.9578	0.000134944	0.00484378
Aats-gln	21.448	21.6651	29.6097	31.1896	22.0722	35.4069	31.5456	31.7476	27.6437	30.7595	-0.31536	4.91984	4.59771	0.0347982	0.186561
Aats-glupro	56.1141	64.0636	65.8815	68.4907	64.1869	119.498	75.0568	93.072	119.101	111.48	-0.699943	6.55566	60.6627	1.31375e-11	9.55437e-09
Aats-gly	24.4408	30.7505	37.9991	31.4004	37.0407	42.4362	37.4196	30.3908	45.7284	41.572	-0.290776	5.2344	6.52391	0.0123804	0.0979135
Aats-his	47.3852	44.961	42.6873	46.5737	36.5333	77.3224	73.0988	74.8917	79.831	77.3649	-0.808933	6.20688	85.6144	1.34034e-14	1.7246e-11
Aats-ile	113.725	115.547	108.569	116.118	113.152	153.083	162.079	165.25	181.364	146.714	-0.510908	7.46732	39.3978	1.3026e-08	3.83339e-06
Aats-leu	28.9299	29.8187	32.0772	28.8715	28.4148	32.8035	23.496	31.2049	31.7774	31.3188	-0.0224662	4.80907	0.0556206	0.830917	1
Aats-lys	136.42	146.065	192.463	195.567	149.431	275.445	219.949	220.605	234.843	221.469	-0.514927	7.85531	18.6101	4.21339e-05	0.00208113
Aats-met	10.4746	11.415	11.3504	9.27259	8.87962	8.07069	8.91979	9.22579	8.52564	10.4396	0.17982	3.32866	1.14996	0.286516	0.622027
Aats-phe	56.8623	54.2793	54.0377	49.3133	53.024	55.4535	59.3927	54.5407	50.6371	55.1807	-0.0419453	5.58631	0.27001	0.604642	0.970246
Aats-pro	9.97584	10.949	12.3374	7.37593	9.64073	11.1948	10.8778	14.3814	10.5925	10.4396	-0.191686	3.24011	1.63198	0.204821	0.556717
Aats-ser	15.4625	16.773	15.2983	19.1774	13.9537	22.1293	24.1487	18.7229	18.8598	18.2693	-0.337013	4.14288	8.59025	0.00431462	0.0476331
Aats-thr	81.8019	99.7062	113.751	115.486	95.3925	143.971	123.354	129.432	140.802	152.493	-0.446775	7.0199	23.565	5.25709e-06	0.000508297
Aats-trp	34.666	33.0801	28.3759	28.2393	35.2648	29.6793	34.8089	27.406	35.911	36.5386	-0.046217	4.88986	0.189212	0.664649	1
Aats-tyr	50.1286	51.4838	56.5051	53.5282	55.8147	53.1104	58.0874	56.1688	56.8376	50.3338	-0.0370745	5.75944	0.13059	0.718696	1
Aats-tyr-m	12.9686	13.9775	15.7918	15.5948	12.9389	14.5793	14.5762	15.7381	14.7261	14.5409	-0.0546824	3.8417	0.134181	0.715024	1
Aats-val	44.8913	50.552	56.9986	56.057	48.9647	96.3276	62.4385	80.59	84.9981	83.7032	-0.6624	6.21767	41.9591	5.33142e-09	1.89742e-06
aay	138.165	164.702	145.581	143.304	141.313	99.7121	183.617	124.277	111.35	116.7	0.204612	7.34883	1.77216	0.186586	0.524629
ab	39.9033	48.6883	47.3755	50.7885	46.174	51.2879	38.7249	53.4553	54.5124	58.5363	-0.138187	5.66372	2.13285	0.147768	0.452777
ABCB7	74.0706	73.3819	87.1018	72.9163	72.3055	85.3931	76.5796	83.8462	79.5727	91.7193	-0.135937	6.25171	3.19932	0.0771426	0.305919
abd-A	0	0.931834	0	0	0	0	0	0	0	0	3.08555	-0.907285	4.31775	0.0427512	0.210513
Abd-B	0	0.465917	0	0	0	0	0	0	0	0	2.24791	-0.982545	2.39468	0.127466	0.412164
Abi	54.6177	56.8419	51.5702	53.5282	55.8147	49.9862	48.9501	56.9828	56.5793	50.893	0.0494673	5.77172	0.366547	0.546466	0.924495
Abl	168.342	204.072	189.255	203.786	201.44	190.572	100.293	198.355	196.09	204.318	0.12087	7.48554	2.02495	0.158303	0.473098
abo	14.465	10.949	7.64917	9.48333	8.87962	8.85173	12.8358	12.2106	12.4009	10.9989	-0.157108	3.41129	1.03893	0.31089	0.653381
Abp1	35.1648	46.5917	48.1157	42.7804	40.8462	50.7673	47.2096	48.8424	46.2451	46.9782	-0.16804	5.48132	2.49708	0.11768	0.390639
abs	22.695	21.8981	24.428	23.8137	22.3259	28.1172	19.7976	25.5066	26.352	25.7262	-0.121707	4.50635	1.24883	0.266846	0.593317
ac	0	0	0	0	0	0	0	0	0	0	0	-1.28411	0	1	1
Ac13E	114.473	119.508	100.673	121.176	110.361	93.7242	51.9958	91.7152	111.608	93.0243	0.358953	6.94107	11.0158	0.00131981	0.0224127
Ac3	298.527	320.318	262.786	286.818	307.742	225.979	202.327	267.819	258.869	258.194	0.283202	8.03186	10.5759	0.00163008	0.0253877
Ac76E	143.901	146.764	115.724	116.75	125.583	117.936	73.7514	109.624	103.599	113.158	0.324873	6.85816	11.5219	0.00103701	0.0190826
Ac78C	33.1697	43.0973	34.5446	37.5119	37.8018	38.7914	19.1449	38.2599	41.8531	34.488	0.114707	5.22541	1.19646	0.277044	0.608311
Acam	0	0	0	0	0	0	0	0	0	0	0	-1.30545	0	1	1
ACC	307.755	363.881	420.457	478.803	362.035	380.885	338.517	373.645	434.808	302.935	0.079075	8.90643	0.242777	0.623447	0.988098
AcCoAS	458.14	492.008	515.455	527.063	455.398	459.248	488.848	489.781	450.051	469.409	0.0545435	9.16212	0.29618	0.587676	0.952987
Ace	500.039	539.765	432.055	508.307	539.881	368.648	283.693	444.466	403.805	425.227	0.388111	8.88857	12.8442	0.000557129	0.0125764
Acer	28.1817	39.8359	38.4926	60.0611	37.0407	57.5362	74.4041	49.6565	39.2696	31.8781	-0.305782	6.12843	1.49216	0.225174	0.559103
Acf1	37.4094	47.5235	47.1287	44.2556	51.7555	48.1638	33.5036	51.8272	50.3788	53.1301	-0.0547422	5.60763	0.148997	0.700436	1
achi	12.4698	12.8127	11.1036	14.3304	12.9389	12.2362	16.5342	10.0398	14.2094	13.9816	-0.0779796	3.75878	0.291759	0.590473	0.955854
acj6	22.695	20.5003	29.6097	22.9707	26.1314	26.2948	18.2747	31.2049	22.9934	29.4546	-0.0731759	4.6953	0.372258	0.543363	0.922912
Ack	107.49	124.167	110.296	116.329	110.868	165.319	97.465	148.969	177.747	187.726	-0.449225	7.19358	35.5649	5.14542e-08	1.17901e-05
Ack-like	90.5307	101.104	94.0107	94.4119	101.481	81.7483	55.9118	98.2275	93.5237	95.2613	0.182109	6.48884	5.1361	0.0259089	0.153906
Acn	156.371	177.048	274.383	202.522	211.842	305.645	220.166	315.576	278.504	313.374	-0.487557	8.02257	11.2537	0.00117807	0.0207865
Acon	1644.27	1443.88	1636.92	1291	1457.78	1366.29	1268.13	1196.64	1317.6	1397.6	0.191097	10.3481	4.74221	0.0321323	0.177444
Acox57D-d	3.74094	3.72734	5.42844	5.69	4.05925	4.68621	7.17934	4.88424	3.87529	4.28769	-0.136227	3.01144	0.245071	0.621813	0.986351
Acox57D-p	14.2156	18.4037	14.8048	16.4378	12.9389	13.2776	17.4045	17.6375	13.951	9.88033	0.0998762	4.5567	0.306175	0.581454	0.947565
Acp1	35.913	17.9378	26.6487	48.8919	19.7889	7.81035	25.6716	16.0095	5.16706	1.67779	1.41707	5.03699	6.55519	0.0121799	0.09709
Acp24A4	0.249396	0	0	0	0	0	0	0	0	0	1.53045	-1.0255	1.67373	0.236514	0.559103
Acp26Aa	0	0	0	0	0	0	0	0	0	0	0	-1.29083	0	1	1
Acp26Ab	0	0	0	0	0	0	0	0	0	0	0	-1.23446	0	1	1
Acp29AB	0	0	0	0	0	0	0	0	0	0	0	-1.30545	0	1	1
Acp32CD	0	0	0	0	0	0	0	0	0	0	0	-1.30545	0	1	1
Acp33A	0	0	0	0	0	0	0	0	0	0	0	-1.29789	0	1	1
Acp36DE	0	0	0.246747	0	0	0	0	0.81404	0	0.186421	-1.56091	-0.929386	1.59461	0.210198	0.559103
Acp53C14a	0	0	0	0	0	0	0	0	0	0	0	-1.19275	0	1	1
Acp53C14b	0	0	0	0	0	0.52069	0	0.542694	0	0.186421	-3.38241	-0.895409	6.03783	0.0160809	0.115
Acp53C14c	0	0.232958	0	0.210741	0	0.52069	0	0.271347	0	0	-0.50553	-0.966979	0.193282	0.665654	1
Acp53Ea	0.249396	0.232958	0	0	0	0	0	0.271347	0	0	0.727535	-0.984184	0.370556	0.55137	0.924495
Acp54A1	0	0	0	0.210741	0	0	0	0	0	0	1.51454	-1.18854	1.8205	0.236514	0.559103
Acp62F	0	0	0	0	0	0	0	0	0	0.186421	-1.49076	-1.13416	1.23915	0.271275	0.600374
Acp63F	0	0	0	0	0	0	0	0	0	0	0	-1.10316	0	1	1
Acp65Aa	0.748188	0.698875	1.48048	2.52889	2.02963	0.260345	1.08778	1.62808	1.55012	1.49137	0.312955	2.47901	0.421966	0.517666	0.897398
Acp76A	0	0	0	0	0	0	0	0	0	0	0	-1.27716	0	1	1
Acp95EF	0.249396	0	0	0	0	0	0	0	0	0	1.53053	-1.14502	1.31752	0.257358	0.580634
Acp98AB	0	0	0	0	0	0	0	0	0	0	0	-1.29789	0	1	1
Acph-1	18.2059	19.1026	12.5841	17.4915	18.0129	11.1948	15.8816	11.1252	14.4678	13.9816	0.351997	4.23042	7.1279	0.00905203	0.0792325
Acsl	246.653	297.022	234.903	274.174	246.346	275.966	282.823	266.734	278.246	237.314	-0.0454262	8.5732	0.139496	0.70969	1
Act42A	37.9082	47.5235	43.921	42.1482	35.2648	42.4362	49.3852	44.2295	44.695	39.7078	-0.091094	5.39883	0.404155	0.526617	0.906246
Act57B	3108.22	1565.25	1796.32	2144.08	1816.26	1499.07	1571.41	1407.75	1448.84	1561.84	0.477868	10.9548	7.04716	0.00943649	0.0814037
Act5C	910.295	1112.84	1134.79	1141.16	1052.11	1036.95	1147.17	986.346	1060.54	1084.6	0.00960323	9.9438	0.0203695	0.886839	1
Act79B	726.241	257.419	97.2184	49.7348	49.9796	234.571	291.307	258.051	23.5101	542.859	-0.19837	8.36959	0.054055	0.816697	1
Act87E	371.6	241.112	236.877	217.484	196.113	200.986	267.811	234.715	144.678	255.397	0.193582	8.18575	0.523864	0.471136	0.844661
Act88F	22.1962	9.78426	5.92194	6.32222	8.37221	9.63276	11.3129	7.32636	6.71717	20.3199	-0.107928	3.61698	0.0428562	0.836479	1
Actbeta	188.793	190.094	143.113	164.589	200.172	107.262	147.068	130.789	120.651	132.918	0.47237	7.20421	15.6123	0.000157485	0.00529942
Actn	369.355	259.982	375.796	288.504	310.787	308.248	237.788	308.521	275.404	358.861	0.107402	8.30717	0.468892	0.495314	0.871138
Actn3	0	0	0.246747	0	0	0.260345	0	0	0	0	0.00648666	-1.25495	4.82036e-05	0.994511	1
ACXA	0.249396	0	0	0	0	0	0	0	0	0	1.53064	-1.28427	1.96396	0.236514	0.559103
ACXB	0.748188	0	0.246747	0	0.253703	1.04138	0.652667	0	0.258353	0.186421	-0.758332	-0.188097	0.832074	0.364189	0.716334
ACXC	5.23731	5.35805	3.20772	2.95037	3.55185	3.90517	3.48089	4.6129	4.9087	3.54201	-0.00496836	1.58053	0.000211724	0.988424	1
ACXD	1.74577	2.56254	1.72723	2.31815	2.53703	1.56207	2.17556	2.44212	2.06682	2.23706	0.0536236	1.66969	0.0244793	0.876033	1
ACXE	0	0	0	0	0	0	0	0	0	0	0	-1.27726	0	1	1
Acyp	0	0	0	0	0	0	0	0	0	0	0	-1.30545	0	1	1
Acyp2	24.4408	17.7048	20.9735	15.3841	21.8185	18.2241	26.3243	19.2656	14.4678	17.1508	0.0659604	4.2141	0.235229	0.62889	0.993244
Ada	3.49154	3.02846	3.45446	2.73963	2.28333	2.3431	3.69845	2.17077	2.84188	2.23706	0.168698	1.22826	0.214481	0.644432	1
Ada1-1	0	0	0	0	0	0.260345	0	0	0.258353	0	-2.24711	0.257103	3.7631	0.097688	0.346854
Ada1-2	4.48913	5.82396	5.42844	4.21482	3.80555	6.50862	4.13356	6.78367	4.13364	6.71117	-0.24942	1.92399	0.870599	0.353367	0.703662
Ada2a	18.9541	23.0629	27.1422	19.3882	22.5796	24.4724	20.6678	24.9639	25.8353	23.1163	-0.09819	4.3059	0.612901	0.435819	0.801974
Ada2b	25.189	21.1992	18.7528	22.76	18.5203	24.7328	24.8014	25.5066	20.9266	26.4718	-0.202843	4.62074	1.62394	0.20593	0.559097
Adam	48.3828	53.3475	80.6864	69.7552	55.561	82.5293	92.0261	74.6204	80.0894	84.4489	-0.427039	6.35124	11.9206	0.000858734	0.0169069
AdamTS-A	47.3852	44.961	49.843	39.4085	42.1148	38.7914	21.538	38.2599	36.4277	38.2164	0.370167	5.25049	10.3857	0.00178682	0.0268826
Adar	271.842	274.658	204.06	253.521	303.429	157.769	165.56	194.013	183.689	182.134	0.566016	8.07901	13.3726	0.000436103	0.0107433
adat	8.97825	10.2502	7.15567	8.85111	7.8648	10.1535	10.4427	8.41175	9.04235	8.57538	-0.111085	3.48332	0.522733	0.471614	0.845337
ade2	28.4311	39.37	41.947	51.6315	28.1611	47.3828	44.5989	34.7324	41.8531	28.3361	-0.0474506	6.24837	0.0292126	0.864685	1
ade3	24.6902	45.8928	39.4796	61.1148	28.4148	47.9035	59.6103	34.461	40.8197	25.3533	-0.0524846	6.35801	0.0259569	0.872378	1
ade5	28.4311	72.6831	59.7129	104.949	45.1592	51.8086	121.831	66.2086	51.9289	24.6076	-0.018692	7.20821	0.00181091	0.966154	1
AdenoK	27.9323	32.6142	39.9731	41.0944	31.2055	32.5431	51.7783	36.6318	33.5859	31.8781	-0.108689	5.52498	0.496738	0.482816	0.858607
Adf1	44.6419	50.785	42.4405	46.1522	47.4425	43.7379	58.305	48.8424	44.9534	43.0633	-0.0457037	5.6231	0.374955	0.54191	0.921935
Adgf-A	55.1165	34.2449	42.6873	33.9293	36.5333	19.7862	23.7136	18.4516	31.519	23.4891	0.788358	5.16835	16.0574	0.000129082	0.00464336
Adgf-B	0	0	0	0	0	0	0	0	0	0	0	-1.27097	0	1	1
Adgf-C	34.666	26.0914	30.8434	23.8137	31.4592	22.9103	30.2403	21.4364	24.0268	23.8619	0.257195	4.22786	4.35856	0.0397417	0.204102
Adgf-D	39.654	47.7565	51.0767	52.053	34.7574	50.7673	62.221	51.5559	41.3364	51.2659	-0.190475	5.49283	0.983319	0.324125	0.668431
Adgf-E	0	0	0	0	0	0.260345	0	0	0	0	-1.5232	-1.26896	1.60778	0.241564	0.559103
Adh	8.72886	7.45467	7.15567	6.95445	6.84999	4.42586	9.79001	5.96963	3.61694	5.03338	0.353344	2.74188	2.25195	0.137059	0.432076
Adhr	0	0	0	0	0	0	0	0	0	0	0	-1.30545	0	1	1
AdipoR	312.493	295.624	255.63	316.322	267.403	222.074	336.776	228.745	228.125	192.76	0.260367	8.40093	2.9957	0.0870241	0.332189
Adk1	125.446	106.462	125.101	106.424	108.331	104.919	124.224	101.212	107.991	115.768	0.0439546	6.8587	0.175964	0.675897	1
Adk2	62.349	61.2681	56.7519	63.2222	59.874	59.0983	77.885	61.053	59.4211	52.7573	-0.0314035	5.98828	0.114771	0.735591	1
Adk3	13.218	14.4434	9.3764	13.4874	12.4315	11.9759	16.0991	12.482	15.5012	13.0495	-0.133863	3.90132	0.947424	0.333069	0.67942
AdoR	10.724	13.9775	17.7658	11.1693	15.2222	13.5379	12.4007	14.6527	17.8263	15.6594	-0.107001	3.65462	0.696693	0.406179	0.766921
adp	29.4287	28.4209	31.3369	34.14	28.1611	32.5431	36.9845	30.3908	37.4612	32.9966	-0.16887	4.9795	2.79716	0.0980169	0.347532
AdSL	20.6999	21.4322	19.7398	25.0782	15.2222	19.5259	31.328	18.9943	20.1515	17.71	-0.0746191	4.98217	0.0697679	0.792298	1
AdSS	151.383	146.764	152.49	147.097	142.328	151.521	140.106	140.558	145.453	158.458	0.00742378	7.13285	0.00726864	0.932253	1
Ady43A	39.9033	35.4097	42.6873	36.2474	48.9647	41.3948	36.1143	36.0891	40.8197	38.4028	0.0747131	4.94961	0.444125	0.506898	0.884385
Aef1	55.8647	72.916	70.8165	67.0156	71.798	64.5655	66.3545	70.2788	65.88	65.0611	0.0274374	6.19739	0.133143	0.716079	1
aft	16.2107	9.78426	12.8309	13.6981	14.2074	9.37242	13.9236	7.05502	10.5925	13.7952	0.268986	3.6584	3.05941	0.0837903	0.324471
Afti	104.497	108.792	96.9717	96.5193	102.75	86.1742	59.8278	96.3281	82.6729	94.5157	0.2808	6.49132	11.5951	0.00100164	0.0186159
Ag5r	27.9323	172.156	0.986989	426.961	387.405	270.759	1.08778	2.17077	703.753	5.77906	0.0529027	5.38462	0.00233096	0.961604	1
Ag5r2	0	0.232958	0	0.210741	0	0	0.217556	0	0.516706	0	-0.482647	-0.242649	0.172089	0.67933	1
AGBE	88.7849	72.6831	86.1148	84.2963	75.0962	83.05	84.8468	85.7456	78.5392	71.0266	0.0144176	6.55845	0.0124298	0.911485	1
ago	69.8309	87.8254	85.3746	85.7715	91.5869	95.2862	51.7783	85.4742	84.4814	97.8712	0.0195135	6.43563	0.0346398	0.852785	1
AGO1	406.515	446.581	373.822	391.135	444.742	332.46	247.143	359.806	348.26	333.881	0.347489	8.70067	12.2547	0.000733835	0.0152672
AGO2	259.122	259.749	283.266	274.806	252.689	268.936	223.865	273.518	280.313	273.667	0.0103994	8.02896	0.0335321	0.855131	1
AGO3	0.498792	1.39775	0	0.842963	0.253703	0	0.435112	0.271347	0.516706	1.11853	0.267251	1.72367	0.0684254	0.79426	1
agt	9.72644	8.15355	6.41543	7.16519	7.6111	7.28966	10.6602	11.3966	8.26729	8.01612	-0.222485	3.02149	1.65909	0.201135	0.550547
Ahcy13	14.465	23.7618	27.8824	29.293	16.4907	28.6379	32.8509	23.0645	29.4522	25.3533	-0.312153	5.14826	1.49546	0.224667	0.559103
Ahcy89E	11.971	6.98875	12.3374	11.8015	11.6704	15.1	17.4045	11.1252	16.2762	8.76181	-0.321328	3.9297	3.85705	0.0527238	0.239065
AIF	29.4287	34.7108	34.0511	34.14	34.5037	32.5431	34.5914	36.0891	28.1605	44.9276	-0.0838134	5.11289	0.587248	0.445555	0.813447
Ak6	4.23973	4.65917	3.20772	3.79333	6.59629	3.38448	5.00378	4.0702	3.10023	4.28769	0.16636	2.27996	0.386091	0.535983	0.915504
Akap200	82.55	108.559	151.503	113.589	111.883	157.769	166.43	172.305	175.163	167.406	-0.562519	7.18903	17.6812	6.30708e-05	0.00273911
Akh	4.98792	0.465917	0	0	0.253703	0.260345	0	0.271347	0.258353	0	2.76462	-0.0962036	7.54515	0.00730977	0.0684163
AkhR	12.9686	27.2561	19.2463	27.607	18.2666	24.2121	32.1983	24.6926	29.4522	9.88033	-0.176952	5.25501	0.410648	0.523322	0.902803
akirin	70.0803	70.8194	69.336	69.123	75.0962	69.5121	83.1063	68.9221	72.8555	72.8908	-0.0522972	6.41533	0.244044	0.622543	0.98704
Akt1	79.5573	88.2913	72.0502	87.4574	94.6314	73.9379	75.0568	56.7115	72.3388	68.6031	0.283074	6.42941	10.4727	0.00171331	0.026221
al	0.748188	0.698875	1.48048	0.421482	1.26852	0.781035	0.435112	1.35673	0.258353	1.30495	0.126611	0.104309	0.0473094	0.828321	1
Alas	211.737	177.048	197.398	169.014	179.368	204.891	208.636	191.842	180.072	187.354	-0.0581161	7.52471	0.494939	0.483607	0.859677
alc	102.751	102.735	145.087	120.544	112.391	132.516	139.453	144.628	129.176	139.816	-0.232659	6.94057	4.03139	0.0477575	0.224393
ald	4.23973	3.72734	3.94796	4.42556	4.05925	4.68621	5.65645	4.88424	4.65035	3.91485	-0.216717	2.20971	0.710416	0.401612	0.761048
Ald	1897.4	1496.53	1555.5	1512.91	1622.43	1347.81	1655.6	1266.92	1250.17	1360.69	0.232453	10.6658	5.36335	0.0229114	0.142627
Aldh	618.003	505.52	612.674	635.594	490.916	573.54	701.617	550.291	467.36	492.339	0.0396394	9.09651	0.129811	0.719499	1
Aldh-III	110.233	124.167	137.438	138.878	128.628	132.776	156.64	151.683	122.459	135.156	-0.127943	7.27405	2.75163	0.100749	0.353372
Alg10	6.73369	7.68763	7.15567	9.90482	9.38702	7.28966	10.0076	6.51232	7.23388	8.57538	0.0387978	3.09181	0.0405099	0.847542	1
Alg-2	51.8744	50.785	31.5837	44.0448	46.174	22.65	29.1525	22.5218	27.127	21.4385	0.868772	5.25046	20.8687	1.60863e-05	0.0010389
Alh	125.446	152.355	148.048	132.134	139.537	152.041	68.3125	156.296	142.352	149.324	0.0628216	6.99064	0.498943	0.481848	0.857616
alien	45.3901	51.9497	65.388	53.5282	48.711	54.1517	61.1332	55.8974	53.2207	54.9943	-0.0767555	5.71128	0.689412	0.408633	0.769816
ALiX	121.955	148.395	169.515	143.936	142.328	163.757	127.923	151.14	158.37	148.578	-0.0456395	7.20162	0.327909	0.568367	0.93523
Alk	259.621	293.761	222.566	254.575	285.924	218.95	148.591	203.51	237.426	235.637	0.334451	7.92558	9.25788	0.00309832	0.0383894
AlkB	4.73852	4.42621	2.46747	5.05778	4.56666	2.60345	4.78623	2.44212	5.16706	4.28769	0.12982	2.43405	0.270765	0.604138	0.969996
alph	87.0392	95.28	118.685	111.693	105.287	95.0259	112.911	116.95	107.991	114.836	-0.0807037	6.87359	0.898554	0.34579	0.695395
alpha4GT1	32.6709	33.0801	24.6747	30.9789	35.2648	31.7621	36.5494	27.1347	27.127	28.5225	0.0506613	4.83614	0.184395	0.668683	1
alpha4GT2	0	0	0	0	0	0	0	0	0	0.186421	-1.4904	-1.23499	1.84939	0.241564	0.559103
alpha-Cat	206.5	221.776	179.632	193.671	213.872	134.078	164.037	163.893	166.379	144.29	0.394287	7.629	17.855	5.84643e-05	0.0026218
alpha-catenin-related	94.5211	99.9392	106.595	100.313	105.287	111.167	89.633	120.207	114.192	116.327	-0.121981	6.6393	2.57753	0.112007	0.377959
alphaCOP	101.005	105.763	112.517	130.027	112.137	108.043	83.3239	111.795	115.484	104.769	0.102663	6.68801	1.85153	0.177113	0.50755
alpha-Est1	44.8913	44.961	63.9076	57.3215	39.324	41.3948	52.2134	40.702	34.1026	31.1324	0.329346	5.76452	6.60748	0.0118522	0.095222
alpha-Est10	12.2204	13.2786	11.3504	12.223	11.4167	12.7569	15.4465	9.49714	13.6927	10.0668	-0.0218076	4.06219	0.0144801	0.904496	1
alpha-Est2	6.48429	10.949	11.8439	12.8552	4.82036	10.4138	18.7098	12.7533	9.3007	6.89759	-0.292922	4.11055	0.588611	0.44503	0.812665
alpha-Est3	20.4505	14.2105	21.2203	24.0244	18.0129	15.881	18.9274	16.8235	17.8263	16.0322	0.197023	3.90687	1.5298	0.219465	0.559103
alpha-Est4	3.49154	1.86367	2.46747	2.52889	1.77592	1.82241	1.30533	1.08539	0.516706	2.05064	0.799339	1.25973	5.34986	0.0230786	0.143188
alpha-Est5	1.24698	3.72734	3.20772	2.73963	1.77592	3.38448	6.09156	3.25616	3.10023	1.86421	-0.462621	2.35062	1.72411	0.192611	0.534472
alpha-Est6	0	0	0	0	0	0	0	0	0.258353	0	-1.52241	-1.20678	1.61369	0.241564	0.559103
alpha-Est7	108.487	96.6778	131.763	138.246	107.57	110.126	136.407	100.67	100.499	75.6871	0.156222	6.97623	0.947825	0.332967	0.679378
alpha-Est8	81.0537	80.3707	75.5047	78.6063	81.9462	64.3052	82.6712	60.5103	67.9468	63.1969	0.230179	6.04423	4.27119	0.0417306	0.208837
alpha-Est9	124.199	110.888	108.816	100.313	111.883	87.9966	95.9421	101.484	101.791	88.1773	0.226426	6.67177	5.92575	0.0169608	0.118804
alphagamma-element:CR32865	0	0.232958	0	0.210741	0.253703	0	0	0	0	0	2.72537	-0.860855	4.66958	0.0403344	0.204317
alphaKap4	0	0	0	0	0	0	0	0	0	0	0	-1.30545	0	1	1
alpha-Man-I	181.81	189.162	162.113	184.609	193.576	150.219	140.759	152.226	159.662	154.357	0.267272	7.51135	9.20194	0.00318499	0.0391443
alpha-Man-Ib	123.451	122.536	98.4522	107.478	114.674	85.1328	92.8963	99.3129	95.3322	99.1762	0.263508	6.69664	12.821	0.000563173	0.0126616
alpha-Man-II	53.8695	46.8247	49.3495	48.8919	44.3981	52.3293	38.0723	38.8026	51.6706	51.2659	0.0674723	5.58535	0.662624	0.417853	0.781029
alpha-Man-IIb	171.584	178.213	163.84	181.869	198.65	131.995	97.465	139.472	159.145	134.783	0.432625	7.24135	30.4401	3.47966e-07	6.12677e-05
alphaSnap	388.808	419.558	431.808	427.804	431.042	422.54	584.79	489.238	392.438	477.984	-0.173554	8.8774	6.43994	0.0129359	0.100165
alpha-Spec	520.988	651.818	788.851	680.482	682.462	791.188	344.173	758.957	859.023	810.187	-0.09991	9.43372	0.806226	0.371712	0.725028
alphaTry	0	0	0	0	0	0.260345	0	55.6261	0	0	-8.71678	3.80672	10.5374	0.00178473	0.0268826
alphaTub67C	3.24215	1.39775	0.986989	1.68593	2.28333	2.60345	3.04578	2.71347	3.61694	3.16916	-0.665119	2.91972	1.29712	0.257861	0.581455
alphaTub84B	1064.67	1028.74	1125.41	1083.42	1051.35	1153.33	1118.89	1024.33	1135.2	1113.68	-0.0508068	9.96489	0.557696	0.457199	0.828646
alphaTub84D	165.599	156.082	170.502	146.254	156.789	185.886	161.426	168.506	156.303	190.336	-0.117638	7.14797	1.95947	0.165119	0.486342
alphaTub85E	10.724	4.65917	8.63616	3.58259	5.07407	5.72759	4.35112	4.88424	4.13364	5.59264	0.394233	1.55942	0.661334	0.418305	0.781524
Alr	18.2059	14.2105	15.2983	16.227	14.4611	18.7448	20.0151	17.9089	19.6348	20.1335	-0.299983	4.03777	4.27486	0.0416449	0.208561
alrm	97.015	114.849	67.8555	83.6641	69.0073	75.7604	86.1521	88.4591	71.047	84.0761	0.0926196	5.76075	0.318453	0.573988	0.939808
alt	58.3586	77.5752	111.53	89.9863	90.8258	110.126	90.0681	118.036	108.767	117.259	-0.345275	6.7302	5.96625	0.0166005	0.11724
aly	0.249396	0	0	0	0	0	0	0	0	0	1.53057	-1.19464	1.50032	0.236514	0.559103
Ama	0.498792	1.39775	0.493495	0.842963	0.253703	0.260345	0.870223	0.271347	0.775058	0.372843	0.441699	0.549713	0.361436	0.54927	0.924495
amd	6.48429	5.35805	6.90893	7.37593	7.3574	6.76897	4.56867	7.32636	8.52564	6.71117	-0.0100167	3.00778	0.00187954	0.99449	1
amn	0	0.232958	0	0	0.253703	0	0.217556	0	0	0.186421	0.0450562	-0.866817	0.00115864	0.988109	1
Amnionless	5.9855	4.19325	2.96097	3.79333	5.83518	4.16552	2.82823	3.52751	5.16706	4.84696	0.140915	2.53841	0.419069	0.536365	0.915675
amon	366.113	384.614	326.2	357.206	407.194	329.336	257.369	332.129	327.075	345.066	0.210868	8.41766	9.4327	0.00284289	0.0363278
amos	0	0	0	0	0	0	0	0	0	0	0	-1.26955	0	1	1
AMPdeam	322.22	313.795	333.849	306.839	314.338	297.314	263.025	306.893	299.172	279.446	0.138269	8.27517	7.36036	0.0080337	0.0731915
Amph	284.311	280.482	286.967	291.454	300.385	220.512	256.933	245.026	211.849	242.534	0.29442	7.90393	14.4841	0.000262064	0.00755783
AMPKalpha	251.391	245.771	231.942	228.864	227.065	233.009	204.502	204.596	221.15	224.824	0.123069	7.73229	3.85621	0.0527491	0.239112
Amun	83.797	95.513	129.049	115.064	108.585	134.078	107.255	135.673	138.735	143.544	-0.309049	6.95354	7.87539	0.00618045	0.0610634
amx	12.4698	11.8809	11.1036	9.06185	12.9389	10.9345	14.7938	12.7533	11.6259	7.45686	0.000372468	3.53417	6.00524e-06	0.99805	1
Amy-d	2.99275	6.98875	0.986989	5.69	2.28333	0.781035	3.04578	14.11	1.29176	0.559264	0.0465525	4.18998	0.00173086	0.96691	1
Amy-p	0	8.15355	0	0.210741	2.02963	0.52069	0.435112	12.2106	0	0.186421	-0.216046	4.05434	0.0158782	0.900015	1
Amyrel	0	0	0.246747	0.210741	0	0	0	0	0	0	2.24374	-1.10889	3.40264	0.0941171	0.34456
ana	29.9275	30.9835	25.415	25.9211	25.624	31.7621	35.244	30.3908	25.8353	36.3522	-0.214343	4.602	3.10962	0.0813352	0.31817
ana1	12.7192	18.8696	19.7398	20.2311	19.0278	19.2655	17.1869	17.9089	23.5101	22.557	-0.148264	4.4177	1.01419	0.316688	0.657919
ana2	1.49638	1.63071	2.46747	1.89667	2.28333	1.56207	2.39311	1.35673	1.80847	2.05064	0.0719222	1.6057	0.0254364	0.873653	1
ana3	3.99033	4.89213	2.46747	4.21482	4.05925	3.64483	3.04578	3.25616	4.9087	5.2198	-0.0379709	2.39249	0.0125163	0.911179	1
Ance	31.1745	24.9266	29.3629	27.3963	30.1907	24.4724	23.9311	33.1043	22.735	22.3706	0.179099	4.75568	2.13723	0.147357	0.452426
Ance-2	0	0	0	0	0	0	0	0	0	0	0	-0.986552	0	1	1
Ance-3	41.6491	30.5176	28.3759	28.45	24.6092	25.2535	21.3205	20.0797	26.352	18.8286	0.460979	5.00663	9.85465	0.00231235	0.0315487
Ance-4	5.73611	10.949	8.14266	25.7104	8.62591	14.0586	28.2823	12.7533	13.4343	5.03338	-0.287423	4.81059	0.344817	0.558579	0.930613
Ance-5	12.2204	14.9093	24.1812	27.607	19.7889	25.2535	37.202	27.9487	30.4856	21.252	-0.519626	4.95008	5.74974	0.0186249	0.125468
Andorra	0	0	0.246747	0	0	0	0.435112	0	0	0	-0.694567	-0.947028	0.327347	0.568932	0.935338
angel	7.98067	9.08538	11.1036	9.27259	7.6111	13.7983	11.9656	11.9393	10.3341	10.626	-0.376176	3.31618	4.7815	0.0314456	0.174227
Ank	865.404	803.474	588.492	717.151	813.373	471.485	519.741	491.138	536.599	498.118	0.589569	9.40695	24.0699	4.27901e-06	0.000431174
Ank2	1101.33	1326.47	1676.15	1424.82	1454.99	1532.13	943.54	1610.99	1817.77	1676.67	-0.118337	10.5443	1.15353	0.285775	0.621042
Anp	0	0	0	0	0	0	0	0	0.258353	0	-1.52233	-1.16203	1.51324	0.241564	0.559103
Ant2	4.73852	3.26142	4.44145	3.58259	5.32777	4.42586	5.22134	4.6129	4.13364	3.54201	-0.0406544	2.25148	0.0291001	0.864943	1
antdh	3.24215	3.72734	2.96097	3.37185	1.01481	3.64483	6.09156	1.62808	1.29176	2.23706	-0.0666128	4.10634	0.00609377	0.937957	1
Antp	1.74577	2.09663	2.96097	1.47519	2.28333	1.30172	0.652667	4.6129	1.55012	2.79632	-0.0420981	1.83749	0.0101776	0.919874	1
antr	0	0.465917	0	0.210741	0	0.260345	0	0	0	0	1.19982	-0.352539	1.30964	0.299476	0.637482
AnxB10	124.947	115.314	155.698	133.61	121.524	183.543	182.312	185.33	160.179	174.118	-0.443485	7.11947	14.4762	0.000263	0.00757176
AnxB11	61.3514	64.0636	56.2584	71.8626	69.0073	58.3173	60.0454	53.4553	58.1294	52.198	0.193966	5.98859	4.99619	0.0279588	0.161599
AnxB9	249.895	258.817	262.046	277.967	247.107	256.179	303.055	238.514	256.803	240.111	0.0013152	7.88553	0.000357932	0.984949	1
aop	60.3538	67.325	59.9596	55.0033	62.9184	55.1931	41.7707	55.3548	49.8621	49.4017	0.281778	5.8666	8.67586	0.00413429	0.0465325
aos	22.9444	24.4606	22.9475	23.1815	24.6092	19.7862	24.5838	19.537	20.9266	21.9977	0.141921	4.62307	1.79166	0.184204	0.520471
Aos1	15.7119	13.9775	13.0776	15.5948	14.2074	14.319	23.2785	17.6375	16.0179	18.6421	-0.312594	4.076	3.54848	0.0629337	0.266551
ap	76.3152	78.507	69.336	89.3541	77.8869	71.0742	66.137	75.1631	66.9134	64.129	0.190495	6.32417	2.70798	0.103449	0.360197
AP-1-2beta	123.451	126.264	160.633	146.465	141.82	173.91	123.354	157.924	164.571	166.101	-0.1693	7.1575	4.88444	0.0297194	0.168115
AP-1gamma	133.427	156.082	128.309	155.527	141.313	149.698	87.4574	139.201	143.386	148.391	0.0980546	7.18281	1.85253	0.176997	0.507305
AP-1mu	62.5984	61.0351	65.1413	60.9041	64.9481	80.1862	67.4423	74.6204	75.439	67.2981	-0.21309	5.97381	6.80425	0.0106997	0.0889087
AP-1sigma	122.952	117.411	88.829	108.742	115.942	76.0207	114.869	90.0871	68.9802	90.6008	0.328328	6.64705	7.78919	0.00645648	0.0626435
AP-2alpha	228.197	256.72	242.553	246.988	247.868	238.997	194.277	232.002	233.293	241.789	0.100291	7.9051	2.75845	0.100335	0.352484
AP-2mu	119.959	117.644	115.231	112.114	118.733	116.374	128.575	123.463	115.484	124.902	-0.0612891	6.75881	0.761807	0.385161	0.742002
AP-2sigma	77.3127	62.4329	60.9466	61.5363	63.4258	54.1517	90.7208	66.48	55.5458	68.2302	-0.0442353	5.85736	0.246241	0.620983	0.985876
Apc	176.323	225.97	242.799	210.319	238.735	225.979	110.301	230.373	246.727	257.075	0.031864	7.69237	0.117162	0.732957	1
APC10	6.98309	7.92059	7.40242	6.53296	6.59629	11.4552	10.6602	6.51232	6.45882	9.13465	-0.324589	3.01766	3.57756	0.0618857	0.264243
Apc2	2.49396	0.698875	2.71422	3.37185	2.28333	2.60345	2.61067	3.79886	1.80847	2.05064	-0.135894	1.89929	0.103821	0.748063	1
APC4	7.98067	9.08538	14.5581	10.9585	8.87962	9.89311	11.748	17.6375	16.5346	9.69391	-0.336349	3.47742	4.0338	0.0476924	0.224213
APC7	0.498792	0.931834	0.986989	0.421482	0.507407	0.260345	0.652667	0.271347	0.258353	1.30495	0.160994	1.33568	0.0347617	0.852529	1
ApepP	15.4625	13.2786	10.6101	13.2767	12.9389	14.0586	19.58	13.296	16.7929	15.2866	-0.271873	3.92877	2.68635	0.104816	0.363293
Apf	12.2204	12.5798	17.7658	12.223	11.1629	15.3603	15.0114	13.296	12.4009	15.2866	-0.117088	3.66228	0.578763	0.44885	0.817322
aph-1	15.7119	16.3071	11.8439	11.1693	12.1778	12.2362	16.7518	15.1954	8.78399	10.626	0.0791416	3.69076	0.289438	0.591952	0.957725
Aph-4	71.826	56.8419	90.3095	71.4411	66.4703	78.8845	86.3697	91.4439	82.4145	81.6526	-0.237538	5.88498	4.42775	0.0382386	0.199086
aPKC	189.292	231.794	173.71	193.882	222.244	202.548	122.701	191.028	192.731	191.828	0.166909	7.76923	3.31666	0.0720113	0.291867
Aplip1	167.843	182.407	190.982	184.609	183.935	194.478	211.682	218.977	189.631	222.401	-0.189304	7.53481	9.85996	0.00230637	0.0315127
Apoltp	88.7849	190.094	126.088	220.013	118.479	158.029	189.491	131.603	218.05	88.7366	-0.0767469	7.65255	0.0719385	0.789169	1
app	316.483	334.761	263.773	293.983	333.113	227.802	128.793	221.69	251.894	254.838	0.50733	8.19102	27.5042	1.08467e-06	0.000156408
APP-BP1	23.4432	24.9266	21.9605	30.3467	28.6685	34.6259	29.37	33.3757	27.127	31.5052	-0.267889	4.86748	7.20399	0.00870461	0.0771648
Appl	782.355	937.891	1004.76	952.97	1023.95	923.704	572.172	1023.25	991.558	1027.37	0.0512672	9.98094	0.279721	0.598228	0.96393
Aprt	10.2252	12.1138	8.63616	9.69408	11.1629	7.55	16.3167	5.15559	8.52564	9.69391	0.117008	3.34876	0.434808	0.523259	0.902803
Aps	97.2644	118.343	130.283	128.552	153.237	121.581	125.965	124.005	123.751	121.733	0.0246068	7.233	0.0876445	0.767897	1
apt	19.7023	20.0344	24.6747	17.4915	18.2666	19.0052	17.622	17.6375	23.2517	20.3199	0.0326469	4.44823	0.0527857	0.818823	1
AQP	72.8236	51.2509	46.1417	37.5119	44.6518	36.4483	52.6485	30.3908	28.9355	37.4707	0.43471	5.15248	4.98229	0.0281715	0.162467
aqrs	0	0	0	0	0	0	0	0	0	0	0	-1.27722	0	1	1
ara	6.2349	8.38651	6.90893	6.53296	7.10369	7.55	5.65645	8.1404	7.23388	12.4902	-0.235011	3.05996	1.51987	0.220953	0.559103
aralar1	120.209	120.673	112.023	132.134	104.526	124.966	140.541	125.091	124.009	110.921	-0.0846	7.45101	0.567318	0.453356	0.823752
Arc1	230.691	181.009	238.605	187.77	224.781	209.317	278.254	178.818	336.634	198.539	-0.177196	7.63497	1.33655	0.250802	0.571081
Arc2	6.2349	5.35805	8.38941	4.21482	6.59629	9.11207	9.13734	6.51232	7.23388	6.89759	-0.342563	2.67511	2.06584	0.154212	0.464859
Arc42	18.2059	17.006	18.7528	19.1774	14.7148	21.6086	25.454	21.1651	13.4343	16.9643	-0.165303	4.52978	1.11652	0.293589	0.631135
aret	57.8599	58.7055	49.5962	56.4785	60.1277	59.8793	54.8241	53.998	56.0625	65.0611	-0.0368795	6.1867	0.0867536	0.769046	1
Arf102F	107.739	95.9789	68.8425	80.9245	70.2758	62.7431	97.6826	66.48	64.8465	64.129	0.250522	6.379	3.66558	0.0588273	0.25577
Arf51F	95.2692	87.3594	74.5177	83.0319	100.974	70.8138	107.255	79.2333	71.3054	83.1439	0.0972504	6.51724	0.891227	0.347754	0.69705
Arf79F	200.764	227.833	260.318	247.199	235.437	216.867	320.46	262.664	223.475	233.213	-0.101353	7.93139	1.7788	0.185771	0.522777
ArfGAP1	35.1648	37.0404	48.6092	49.7348	40.5925	57.2759	45.6867	53.7267	55.0291	44.1819	-0.273234	5.60212	5.22431	0.0246989	0.149363
ArfGAP3	37.16	42.8644	46.6352	50.9993	47.1888	51.8086	45.6867	51.0132	54.2541	47.9103	-0.154533	5.65245	2.39802	0.125112	0.407023
Arfip	29.1793	30.0516	27.1422	36.0367	36.5333	40.8741	35.0265	38.5312	39.528	38.4028	-0.273393	5.17456	10.5205	0.00167421	0.0258179
Arfrp1	14.2156	13.2786	10.8569	14.9626	13.1926	16.4017	12.1831	13.5673	11.3675	12.3038	0.0198841	3.69199	0.0173663	0.895461	1
arg	1.49638	3.02846	2.46747	5.47926	1.52222	4.68621	5.65645	4.88424	3.87529	2.23706	-0.568384	1.98033	1.87961	0.173898	0.502091
Argk	3565.86	2770.58	3269.16	2508.66	2902.37	2872.12	3138.46	2576.71	2662.07	2858.77	0.0899813	11.2158	0.795877	0.374785	0.729137
ari-1	134.923	136.514	150.516	131.081	152.476	116.374	121.396	146.256	137.185	141.867	0.0891432	7.13816	1.7552	0.188686	0.528138
ari-2	47.3852	50.0861	58.7259	53.9496	60.1277	63.7845	42.6409	48.8424	59.1628	55.74	0.00124894	5.7276	0.000249959	0.987422	1
Ark	103.001	113.684	80.1929	78.3956	108.078	69.7724	68.3125	76.5198	80.6061	78.297	0.371233	6.31363	17.6891	6.2854e-05	0.00273791
Arl1	20.6999	17.9378	20.9735	22.9707	21.3111	24.7328	25.2365	20.8937	21.4433	17.1508	-0.0717873	4.3596	0.380142	0.542356	0.922325
Arl2	10.9734	13.9775	11.5971	10.9585	12.4315	10.1535	18.0571	10.0398	8.26729	11.3717	0.0403663	3.56968	0.0677852	0.867134	1
Arl4	124.199	111.587	67.1153	101.577	110.361	52.069	105.95	85.4742	80.0894	81.4662	0.344171	6.69425	5.48928	0.0214102	0.136758
Arl6	0.997584	0.931834	1.48048	1.0537	1.52222	1.30172	2.17556	1.08539	1.03341	0.186421	0.0616936	0.782274	0.0153601	0.901651	1
arm	618.502	594.976	523.351	556.777	576.921	580.048	442.944	585.838	546.674	588.346	0.0651711	9.01024	1.32556	0.252745	0.573834
armi	6.73369	7.22171	11.1036	12.0122	9.13332	11.1948	7.61445	8.41175	7.75058	8.76181	0.0855431	3.43322	0.121988	0.727731	1
Arp1	86.7898	85.9617	93.764	92.3045	89.811	90.6	117.915	99.0416	89.3901	105.142	-0.16349	6.47141	5.83631	0.0177859	0.121849
Arp10	27.9323	20.0344	27.1422	27.1856	25.8777	35.9276	31.7631	28.4914	24.8019	27.4039	-0.21072	4.72694	2.91341	0.0914059	0.344125
Arp2	57.1117	77.1093	70.8165	73.97	66.4703	66.6483	78.9728	75.1631	76.9891	78.4834	-0.1231	6.16738	2.87494	0.0935371	0.34456
Arp3	32.9203	38.9041	35.2849	39.1978	43.3833	39.5724	42.6409	37.7172	38.7529	35.0472	-0.0295882	5.28579	0.127358	0.730178	1
Arp5	9.47704	11.8809	18.0126	13.9089	14.7148	18.4845	17.4045	19.2656	12.1426	20.6928	-0.375357	4.0509	4.7045	0.0328063	0.180391
Arp53D	0	0	0	0.210741	0	0	0	0	0	0	1.51453	-1.19604	1.72924	0.236514	0.559103
Arp6	13.9662	16.0741	16.7788	18.3344	13.7	20.3069	25.0189	21.1651	19.6348	19.3878	-0.417347	4.17904	10.3618	0.00180763	0.0270829
Arp8	3.74094	6.52284	5.42844	5.69	6.08888	9.37242	5.4389	6.24098	11.6259	8.57538	-0.578505	3.01342	9.57729	0.00264817	0.0345357
Arpc1	65.0923	87.5924	105.855	94.2011	88.5425	124.705	107.473	92.2579	106.183	111.48	-0.296742	6.56573	7.43806	0.00772061	0.0711922
Arpc2	38.407	41.6996	39.4796	45.0985	49.2185	34.6259	46.3394	39.6166	35.6527	39.1485	0.129007	5.46517	0.851033	0.358806	0.710015
Arpc3A	15.7119	14.2105	15.5451	13.2767	15.2222	16.6621	21.7556	16.0095	15.5012	14.7273	-0.197048	4.00816	2.5559	0.113501	0.381463
Arpc3B	0.997584	2.32958	1.48048	1.0537	1.77592	1.04138	2.82823	1.08539	1.29176	1.67779	-0.0782801	0.919506	0.0355127	0.850963	1
Arpc4	28.4311	24.9266	29.8564	28.45	22.0722	35.9276	37.6372	29.0341	28.9355	33.183	-0.301453	4.74355	5.008	0.0277792	0.161055
Arpc5	10.2252	17.006	21.2203	15.8056	17.7592	19.5259	22.8434	16.8235	25.3186	21.0656	-0.365677	4.16825	6.73176	0.01111	0.0913202
arr	60.8526	72.6831	56.9986	55.8463	57.0833	48.9448	29.8051	56.1688	52.704	52.3844	0.340491	5.78432	14.3726	0.000275704	0.00780322
Arr1	5128.58	5096.9	5698.63	5465.56	5301.13	6693.99	8325.86	6833.87	6493.96	7185.8	-0.412846	12.5268	21.3935	1.2906e-05	0.000907053
Arr2	8206.87	8652.31	9577.74	9010.85	9158.18	11031.6	12868.2	9961.14	11260.6	11052	-0.332658	13.0717	13.4669	0.000417546	0.0104712
Ars2	110.233	115.547	136.451	135.296	131.926	135.119	125.747	148.155	144.161	145.968	-0.151202	7.07035	3.83325	0.053444	0.240764
Art1	13.9662	16.5401	21.2203	19.3882	15.9833	16.6621	25.6716	19.2656	19.8932	20.1335	-0.22414	4.50151	2.02138	0.158666	0.473676
Art2	1.24698	1.63071	1.48048	1.68593	1.26852	1.04138	0.652667	0.271347	1.55012	0.932107	0.706219	0.830367	3.56158	0.078778	0.310636
Art3	6.73369	8.38651	9.3764	10.9585	7.3574	11.1948	17.1869	13.296	7.75058	10.2532	-0.474849	3.50627	6.43957	0.0129384	0.100165
Art4	22.4456	25.1595	20.9735	18.1237	21.8185	22.65	20.6678	20.351	20.1515	22.9298	0.0210094	4.58906	0.0245296	0.899822	1
Art6	0	0	0	0	0	0	0	0	0	0	0	-1.30545	0	1	1
Art7	7.48188	6.98875	9.86989	9.27259	9.38702	11.7155	10.6602	14.9241	10.5925	10.9989	-0.447749	3.53121	6.58419	0.011997	0.096062
Art8	3.24215	3.02846	2.71422	2.52889	2.28333	3.64483	3.69845	2.71347	3.35859	4.47411	-0.384204	1.92242	1.92622	0.16871	0.493185
Art9	0	0	0	0	0	0	0	0	0	0	0	-1.30545	0	1	1
aru	44.3925	49.3872	67.1153	52.053	46.4277	60.9207	43.9463	49.6565	63.2964	58.1635	-0.0888105	5.76068	0.501054	0.480926	0.856612
arx	3.99033	3.26142	3.70121	3.79333	2.28333	3.12414	6.09156	3.52751	3.61694	3.91485	-0.257189	2.207	0.954332	0.331322	0.677523
ARY	0	0	0	0	0	0	0	0	0	0	0	-1.30545	0	1	1
Asap	144.4	155.15	155.451	161.427	167.952	146.053	95.507	154.396	148.553	149.137	0.178092	7.20559	6.63378	0.0116909	0.0945563
Asator	727.238	708.893	565.545	617.049	729.397	484.762	480.363	558.974	541.249	579.398	0.340104	9.23876	12.6516	0.000609457	0.0133609
Asciz	9.47704	8.38651	8.8829	8.64037	6.34258	9.63276	12.8358	11.9393	7.49223	10.9989	-0.344021	3.11856	3.32379	0.071712	0.290936
ase	0.498792	0	0	0.210741	0	0	0	0.271347	0	0	1.20295	-1.14381	0.894948	0.348961	0.697843
asf1	15.2132	16.3071	12.5841	13.0659	12.9389	13.5379	15.664	16.2808	12.9176	15.473	-0.0771341	3.97402	0.238502	0.626516	0.990898
ash1	65.3417	86.4276	86.8551	88.9326	84.7369	80.1862	50.9081	84.9316	84.9981	80.7205	0.113046	6.21808	1.63245	0.204757	0.556678
ash2	34.4166	27.955	31.0902	30.7682	32.9814	38.531	37.8547	31.4762	29.4522	33.3694	-0.120104	5.04346	1.78359	0.185186	0.521921
asl	1.24698	0.931834	3.45446	3.16111	4.82036	4.42586	3.04578	4.0702	3.61694	3.54201	-0.451475	2.14875	1.46978	0.228656	0.559103
asp	0.748188	0.465917	0.493495	0.210741	0.76111	0.260345	1.30533	1.89943	1.03341	2.6099	-1.43969	1.92596	2.47	0.119661	0.394488
asparagine-synthetase	70.0803	76.6433	77.4787	83.6641	69.261	77.3224	106.602	81.6754	80.8644	74.1957	-0.157219	6.30438	3.02108	0.0857198	0.328861
Asph	157.618	123.701	147.802	105.16	116.704	122.102	112.911	122.649	112.9	130.868	0.113211	7.07952	0.945257	0.333619	0.679797
ASPP	53.1213	58.2396	70.8165	60.9041	63.6795	63.5242	38.5074	62.4098	73.1138	69.1623	0.00108552	6.11922	9.52399e-05	0.992236	1
asrij	23.6926	20.0344	19.2463	22.5493	18.0129	23.431	33.286	23.6072	27.3854	24.9805	-0.358475	4.47681	8.43642	0.00465953	0.0502838
ast	7.23248	10.949	9.62315	10.3263	6.84999	11.1948	8.26712	9.22579	10.3341	10.0668	-0.119338	3.27704	0.544176	0.462688	0.835155
AstA	74.5694	72.6831	63.4141	63.8545	71.798	71.3345	101.599	68.6507	66.9134	76.8056	-0.156126	5.89274	2.5925	0.110986	0.376221
AstA-R1	20.2011	16.5401	11.5971	11.38	13.4463	13.7983	10.4427	11.1252	9.3007	10.4396	0.40857	3.91524	4.39993	0.0388355	0.200929
AstA-R2	0.498792	0.698875	0.986989	2.10741	0.507407	0.781035	0.652667	1.35673	0.516706	0.745686	0.285745	0.916377	0.284625	0.595044	0.961021
AstC	174.827	146.997	127.322	123.283	151.715	112.729	182.312	153.582	120.134	132.732	0.0447648	6.88144	0.222213	0.638536	1
AstCC	0.997584	1.63071	1.72723	0.842963	1.26852	0.52069	0.435112	0.542694	0.258353	0.559264	1.41828	0.365133	6.6516	0.011583	0.0940069
AstC-R1	97.7632	94.5811	65.388	88.0896	96.4073	69.5121	58.5225	78.9619	74.6639	82.7711	0.278928	5.60065	6.28065	0.0140629	0.105912
AstC-R2	17.9565	20.7333	11.8439	14.3304	17.2518	15.1	14.7938	12.2106	14.7261	13.4223	0.224049	4.10071	2.32027	0.131317	0.419587
asun	7.73127	13.2786	8.63616	10.1156	12.4315	11.9759	10.0076	8.95445	10.8508	12.4902	-0.0596706	3.42913	0.204107	0.652548	1
Asx	77.8115	77.1093	89.3225	76.2882	74.0814	78.6242	45.4692	76.2485	79.831	73.0772	0.161526	6.38856	2.96592	0.0885824	0.336372
Atac1	4.98792	5.12509	10.1166	5.90074	5.32777	6.50862	7.17934	5.96963	6.97552	5.2198	-0.0158391	2.59425	0.00755942	0.950697	1
Atac2	10.724	10.4831	11.3504	11.5907	10.9092	10.9345	10.0076	11.9393	12.4009	11.931	-0.053771	3.47627	0.159573	0.698406	1
Atac3	11.4722	16.5401	17.7658	13.9089	16.9981	16.1414	16.9694	21.1651	15.7595	16.4051	-0.170992	3.95047	1.62864	0.205281	0.557785
ATbp	8.47946	5.35805	8.63616	6.7437	9.64073	7.81035	7.3969	7.59771	9.55905	7.8297	-0.0516934	3.09212	0.0783171	0.780254	1
Ate1	73.073	66.6261	67.1153	64.6974	60.8888	61.9621	80.9308	55.8974	60.1962	66.9253	0.0262208	5.8801	0.0829776	0.836814	1
Atet	123.451	146.531	142.373	146.676	125.329	120.279	106.602	134.859	131.502	135.901	0.121821	7.07133	2.61958	0.109165	0.37235
Atf-2	17.2083	13.9775	17.5191	13.4874	10.9092	12.2362	23.7136	16.8235	14.9845	20.1335	-0.274527	3.85457	3.6178	0.0604666	0.260408
Atf3	92.7753	88.9901	79.2059	82.3996	90.8258	60.6604	50.0378	65.6659	71.8221	59.0956	0.500246	6.17719	23.5844	5.21564e-06	0.000507221
Atf6	105.993	99.7062	64.6478	95.4656	134.209	44.519	65.7019	57.2542	61.488	51.4523	0.833481	6.76548	18.6015	4.22906e-05	0.00208113
Atg1	129.935	142.804	132.75	131.713	147.148	133.557	106.167	141.914	136.152	149.883	0.0355127	7.17093	0.327481	0.568619	0.93523
Atg10	2.74336	1.86367	2.96097	2.31815	1.77592	2.3431	2.82823	1.35673	1.55012	2.79632	0.0745617	1.76524	0.048276	0.861134	1
Atg101	74.8188	73.6149	68.8425	73.7593	68.7536	66.6483	68.095	72.7209	66.3967	68.0438	0.0739357	6.32034	1.13934	0.288739	0.624643
Atg12	21.448	17.006	16.2853	14.1196	16.4907	15.1	25.2365	13.8387	13.6927	17.71	-0.0141715	3.91794	0.0116998	0.914113	1
Atg13	32.1721	36.1086	31.3369	38.1441	31.4592	33.3241	27.6296	24.9639	33.5859	32.9966	0.150349	5.16599	1.86096	0.176025	0.505819
Atg14	28.1817	34.4779	33.3109	35.4044	35.0111	42.4362	47.2096	44.2295	35.3943	45.4868	-0.368839	5.30432	12.5002	0.000654097	0.01406
Atg16	17.7071	21.4322	18.0126	20.0204	14.9685	18.2241	24.8014	20.6224	25.3186	20.8792	-0.251744	4.42293	5.68253	0.019305	0.127634
Atg17	105.993	134.65	117.452	121.808	137.254	121.06	89.1979	109.624	136.152	123.597	0.0909013	6.9428	1.50289	0.223528	0.559103
Atg18a	101.754	94.5811	89.3225	88.5111	89.0499	78.6242	88.7628	83.0321	73.6305	76.0599	0.211027	6.4414	8.87649	0.00374164	0.0434627
Atg18b	66.3393	73.149	63.4141	57.5322	74.8425	53.3707	55.0416	57.7969	56.5793	52.5708	0.283914	5.92619	9.57215	0.00265485	0.0345573
Atg2	85.7922	92.7175	102.153	97.1515	101.228	93.2035	65.4843	85.4742	94.5571	87.4316	0.169722	6.53181	4.85273	0.0302402	0.170255
Atg3	24.4408	25.3925	39.9731	34.983	26.6389	41.6552	42.6409	41.7874	33.5859	40.0806	-0.398493	5.16952	10.5337	0.00166361	0.0257183
Atg4a	45.8888	49.1542	55.2714	59.6396	46.6814	57.0155	68.3125	53.4553	54.5124	49.9609	-0.141228	5.82993	1.51466	0.22174	0.559103
Atg4b	48.1334	48.6883	43.4275	39.83	46.174	41.9155	44.5989	42.6015	43.4033	41.7584	0.0777157	5.39688	0.877621	0.351442	0.700998
Atg5	23.4432	22.8299	18.2593	18.5452	19.5352	18.4845	21.9731	14.6527	16.0179	19.5742	0.171563	4.23398	2.28437	0.1343	0.425866
Atg6	27.1842	30.0516	34.5446	27.8178	25.3703	34.8862	36.9845	29.0341	30.2273	29.641	-0.149488	4.79268	2.05328	0.155455	0.467512
Atg7	23.1938	16.5401	17.7658	13.4874	17.7592	11.4552	16.3167	14.9241	20.6682	14.168	0.192306	4.12857	1.84146	0.178283	0.509506
Atg8a	649.427	559.333	507.806	527.695	596.964	414.729	615.9	471.601	407.939	445.361	0.270163	9.03773	9.01384	0.00349533	0.0416724
Atg8b	0.498792	0	0.493495	0	0	0	0	0	0	0	3.10439	-0.928699	4.98857	0.0284898	0.163369
Atg9	60.6032	45.6599	52.3104	52.4745	40.8462	45.3	41.7707	43.4155	50.3788	42.5041	0.174669	5.47401	2.87194	0.0937059	0.34456
atilla	159.613	116.246	144.347	139.3	133.702	111.428	150.549	100.398	97.399	111.294	0.278152	6.80831	7.89653	0.00611467	0.0607725
atk	0	3.26142	0.986989	0.632222	0	0.260345	0.652667	1.62808	1.03341	1.11853	0.0813858	1.81729	0.00644619	0.936192	1
atl	126.693	124.167	124.361	111.903	123.046	115.593	119.221	110.438	119.617	118.75	0.0636269	6.94355	0.699343	0.405291	0.765938
atms	34.4166	32.1483	40.9601	37.7226	33.4888	38.0104	35.6792	38.8026	43.4033	39.7078	-0.129218	5.28974	1.40283	0.23947	0.559103
ato	0.997584	0	0.493495	1.0537	0.253703	0.260345	0.652667	0.542694	0.516706	0.186421	0.390995	-0.194208	0.388356	0.534792	0.914202
Atox1	53.3707	55.91	67.1153	61.1148	56.5758	76.2811	97.6826	75.4344	65.6216	76.4328	-0.413424	6.13471	21.3514	1.31357e-05	0.0009155
ATP7	39.1552	34.2449	46.6352	45.7307	39.324	43.2173	25.8891	36.6318	46.7618	38.5892	0.105238	5.43623	1.19084	0.278166	0.609476
Atpalpha	5428.6	5651.34	5152.82	5269.36	5515.76	4511.52	3451.74	5014.22	4759.89	5097.69	0.242669	12.1995	10.1731	0.00198054	0.0284854
ATPCL	349.404	378.325	363.459	352.78	347.827	356.933	276.078	325.888	343.092	361.285	0.107407	8.3503	2.65585	0.106778	0.367053
ATPsyn-b	658.655	485.718	607.245	522.216	488.633	563.386	757.094	560.331	516.706	576.415	-0.106668	9.00558	0.93731	0.335649	0.682436
ATPsyn-beta	3932.23	3093.22	3009.82	2724.88	2969.09	2325.66	3314.68	2313.23	2376.85	2453.87	0.299013	11.3167	8.14041	0.00540625	0.0558212
ATPsyn-Cf6	304.014	245.305	375.796	295.459	271.463	326.993	429.673	297.125	312.865	326.424	-0.182789	8.10439	2.64012	0.107806	0.36922
ATPsyn-d	342.421	270.931	456.976	331.074	301.4	396.245	461.218	365.776	346.193	395.773	-0.20711	8.43465	2.54854	0.114015	0.382039
ATPsyn-gamma	554.407	422.354	639.322	485.125	473.41	553.233	652.45	511.217	496.812	532.792	-0.0934612	8.91584	0.716658	0.39956	0.759051
AttA	9.97584	15.6082	3.70121	14.9626	58.0981	4.94655	4.56867	3.79886	28.1605	4.84696	1.16133	4.78178	1.12383	0.292024	0.629146
AttB	4.48913	9.08538	1.23374	6.11148	16.237	4.16552	6.52667	3.25616	17.3096	4.10127	0.0825632	4.39467	0.00632013	0.936818	1
AttC	5.9855	16.3071	0.740242	10.7478	40.3388	1.04138	4.35112	2.44212	15.5012	0.372843	1.68848	6.12878	1.15311	0.285862	0.62107
AttD	0	15.8412	0	8.64037	1.26852	0.260345	0.217556	0	0.775058	0.186421	4.09079	1.06325	10.5314	0.00166548	0.0257234
att-ORFA	17.9565	15.3753	15.7918	11.38	13.1926	11.7155	13.0533	15.1954	10.5925	13.0495	0.208944	3.80582	2.025	0.158298	0.473098
att-ORFB	0	0	0	0	0	0	0	0	0	0	0	-1.30545	0	1	1
Atu	9.97584	11.8809	17.0256	15.8056	10.6555	22.9103	16.5342	19.537	20.9266	20.3199	-0.610943	4.09064	7.58956	0.00714615	0.0673426
Atx-1	0.498792	0.232958	0	0.421482	0	0	0	0	0.258353	0.186421	1.14312	-0.653065	1.22546	0.271336	0.600406
Atx2	154.625	174.253	195.424	182.291	193.322	184.324	109.866	180.174	199.19	193.505	0.0541198	7.46295	0.430486	0.513479	0.891896
Atxn7	29.1793	25.1595	38.9861	37.9333	28.9222	33.5845	25.2365	40.1593	35.911	41.3856	-0.136788	4.9602	1.38933	0.241726	0.5594
aub	2.99275	4.19325	2.96097	2.31815	1.77592	2.08276	5.22134	2.71347	3.61694	4.66054	-0.379227	2.02395	0.731919	0.394607	0.752977
aur	0.748188	1.39775	3.45446	2.73963	3.55185	1.82241	2.39311	2.17077	2.06682	2.6099	0.0913868	1.65133	0.0430288	0.836155	1
aust	0	0	0	0	0	0	0	0	0	0	0	-1.2841	0	1	1
aux	128.439	129.758	112.517	115.907	131.672	93.4638	83.1063	107.453	107.475	110.175	0.30135	6.7132	16.6854	9.76854e-05	0.00375499
ave	10.9734	10.4831	9.62315	8.00815	8.11851	10.1535	13.706	10.0398	8.26729	10.0668	-0.151536	3.37612	0.931626	0.337111	0.684271
Aven	6.2349	6.52284	7.89591	6.11148	6.59629	9.63276	8.48468	8.1404	7.49223	7.45686	-0.302582	2.89853	3.90191	0.0654828	0.273833
awd	268.35	233.657	248.721	279.021	208.798	319.964	422.058	264.563	252.669	274.599	-0.308626	8.05745	6.28717	0.0140148	0.105617
Awh	4.73852	8.61946	3.94796	7.16519	9.38702	7.02931	5.00378	5.15559	6.71717	6.33833	0.164985	2.63882	0.642777	0.424887	0.788275
Axn	80.3055	88.0583	81.6734	81.7674	86.2591	84.3517	62.6561	92.8006	84.4814	88.1773	0.0202466	6.35691	0.097939	0.755065	1
axo	95.5186	119.042	102.4	114.432	92.6017	134.598	67.4423	110.71	139.769	140.189	-0.176726	6.47757	2.84286	0.0953569	0.346854
Axs	51.8744	32.3812	39.9731	41.0944	36.2796	35.4069	35.6792	33.9184	34.8776	33.7423	0.215134	5.12823	3.72872	0.0567341	0.249538
Axud1	33.4191	40.0689	38.2458	33.7185	40.5925	38.0104	29.37	37.7172	34.8776	39.1485	0.0543202	5.5303	0.391455	0.53317	0.913019
az2	10.2252	8.38651	10.8569	9.90482	8.62591	15.1	13.2709	11.9393	12.9176	12.3038	-0.446972	3.5311	9.01714	0.00348961	0.0416339
b	36.6612	26.3243	35.2849	20.0204	27.4	29.9397	25.2365	28.2201	21.1849	32.6237	0.0800449	5.05224	0.222414	0.638385	1
B4	186.798	187.998	180.619	198.939	193.068	142.409	108.343	137.301	161.47	143.172	0.452339	7.49599	22.4306	8.38274e-06	0.00069073
B52	693.57	698.875	544.078	590.706	641.616	591.764	495.81	611.616	552.617	667.202	0.118381	9.13884	3.9588	0.0497614	0.229806
b6	4.98792	2.32958	5.42844	4.21482	3.04444	2.08276	1.52289	1.35673	2.32517	1.67779	1.1513	1.48118	12.7225	0.000589626	0.0130102
bab1	18.2059	12.5798	12.3374	14.9626	12.6852	12.4966	6.30912	11.9393	9.55905	11.7445	0.446381	3.74809	7.45456	0.00765575	0.0708284
bab2	42.6467	49.3872	43.4275	52.2637	44.6518	41.9155	27.1945	44.2295	48.5703	46.4189	0.160103	5.59599	2.54181	0.114487	0.383389
babo	172.582	176.815	130.776	165.221	183.174	121.581	102.034	136.759	134.085	144.849	0.373988	7.33847	15.605	0.000157996	0.00529942
babos	32.1721	29.8187	28.3759	33.297	25.3703	26.2948	46.7745	29.8482	26.352	19.5742	0.00375343	5.25649	0.000363761	0.984827	1
Bacc	429.21	432.371	418.977	457.729	505.377	410.043	616.336	526.956	415.431	460.647	-0.114909	9.05547	1.78101	0.185501	0.522458
Bace	0	0	0	0.210741	0	0.781035	0.217556	26.3206	0.258353	0	-6.17028	2.47841	13.801	0.000358051	0.00950654
baf	20.2011	25.6254	27.8824	23.3922	20.2963	27.3362	27.6296	32.833	27.127	33.9287	-0.343016	4.7054	7.05853	0.00938137	0.0811387
bai	69.8309	61.0351	69.5827	74.813	65.4555	69.7724	94.2017	73.8063	75.6974	73.45	-0.183879	6.16706	5.45264	0.0218359	0.1383
Baldspot	192.035	181.708	156.931	214.113	213.111	146.053	158.163	129.161	152.686	145.782	0.388088	7.46264	15.6695	0.000153499	0.00523996
ball	4.48913	2.7955	7.64917	3.37185	2.02963	7.02931	4.35112	5.42694	8.26729	6.52475	-0.633173	2.8849	4.33232	0.0403282	0.204317
bam	0	0	0	0	0	0	0	0	0.258353	0.186421	-2.22561	-0.288454	1.97211	0.164572	0.485332
ban	0	0	0	0	0	0	0	0	0	0	0	-1.30545	0	1	1
bap	1.99517	0.465917	0.246747	0.632222	0.76111	0	0.217556	1.08539	1.03341	1.30495	0.132969	0.41652	0.0750983	0.828288	1
Bap170	35.1648	41.6996	41.4536	43.4126	33.9962	47.9035	32.1983	41.7874	43.92	42.8769	-0.0894887	5.34873	0.539892	0.464449	0.83709
Bap55	16.9589	17.006	21.467	15.8056	16.237	20.8276	24.3663	17.6375	18.6014	24.4212	-0.281766	4.25141	4.47159	0.0373178	0.196171
Bap60	34.1672	28.188	39.9731	38.5656	37.8018	42.6966	49.8203	39.0739	37.4612	37.8435	-0.211889	5.28485	3.59796	0.0611617	0.262444
barc	49.131	53.3475	75.0112	56.6893	58.0981	71.0742	73.969	81.6754	75.6974	72.3315	-0.358189	6.01279	8.1261	0.00544535	0.056121
barr	5.23731	5.35805	6.41543	8.85111	4.82036	6.76897	6.96179	7.59771	8.00894	6.15191	-0.194595	3.08627	0.737567	0.392797	0.75095
baz	68.3345	75.0126	60.4531	67.8585	70.5295	69.2517	31.9807	48.2997	65.6216	65.6203	0.286088	6.09482	7.52681	0.00737847	0.0687931
bbc	233.933	208.032	203.813	202.1	216.155	202.288	205.59	205.41	196.606	212.707	0.0569832	7.60362	1.57243	0.213206	0.559103
bbg	38.407	48.4554	49.5962	49.7348	52.5166	36.969	30.2403	39.3453	52.9623	36.5386	0.287354	5.4857	6.50573	0.0124985	0.0984589
BBS1	0.498792	0.698875	0.246747	0.632222	0	0.52069	0.217556	0.542694	1.03341	0.186421	-0.169967	-0.0614709	0.0594223	0.843832	1
BBS4	3.99033	1.86367	3.20772	2.10741	3.80555	1.82241	3.04578	2.71347	1.55012	1.49137	0.485478	1.74943	2.09427	0.151439	0.459148
BBS8	1.49638	1.63071	0.986989	0.842963	1.01481	2.08276	1.74045	1.35673	1.80847	1.67779	-0.531565	0.889953	1.48904	0.225656	0.559103
bbx	0.748188	0.698875	1.23374	0.842963	1.26852	0.260345	0.870223	1.35673	1.29176	0.745686	0.0878108	0.714966	0.0268666	0.870181	1
bc10	64.8429	47.7565	45.1548	48.2596	54.7999	40.0931	62.0034	39.6166	41.0781	48.2831	0.169866	5.60007	3.21197	0.0765708	0.304477
BCAS2	6.73369	3.02846	8.38941	6.7437	6.59629	10.1535	10.0076	8.95445	11.1092	10.626	-0.693367	3.09326	10.3154	0.00184861	0.0273529
bcd	0	0	0	0	0	0	0	0.271347	0	0	-1.51999	0.552632	0.652426	0.422482	0.786166
bchs	213.234	262.544	205.047	234.765	260.553	200.466	100.728	186.415	216.758	204.318	0.372834	7.68494	13.761	0.000364678	0.00962141
BCL7-like	8.47946	10.0172	8.8829	8.85111	11.4167	6.50862	10.2251	9.22579	9.8174	8.76181	0.0934856	3.44372	0.313526	0.57696	0.942817
bcn92	11.971	15.8412	21.2203	16.8593	17.5055	23.431	31.328	28.7628	19.1181	30.0138	-0.672894	4.39773	16.0787	0.000127862	0.00461933
Bdbt	9.47704	9.78426	18.0126	16.6485	12.4315	20.0466	18.0571	17.6375	13.176	15.473	-0.342171	3.87451	5.1053	0.0263461	0.155282
bdg	37.4094	33.0801	30.3499	32.2433	27.6537	34.1052	24.1487	35.0037	34.6193	33.5559	-0.00383659	5.03605	0.00168907	0.967312	1
be	36.6612	36.1086	33.8044	29.5037	33.9962	33.0638	32.4158	28.7628	30.4856	31.3188	0.122412	4.95624	1.64407	0.203168	0.554374
BEAF-32	27.4336	25.1595	23.441	25.7104	25.1166	31.7621	37.6372	28.7628	23.2517	32.2509	-0.279599	4.84448	6.47269	0.0127162	0.0995755
beag	17.9565	19.1026	22.9475	18.3344	18.5203	28.1172	29.5876	32.0189	25.8353	32.2509	-0.611081	4.588	15.112	0.000197197	0.00616265
beat-Ia	31.9227	31.4494	31.5837	29.293	34.25	29.6793	25.6716	35.5464	35.136	35.0472	-0.0234369	4.98329	0.0576489	0.810815	1
beat-Ib	75.0682	77.1093	76.2449	78.3956	86.2591	67.4293	67.4423	78.4192	64.5882	76.992	0.146918	5.98237	2.65932	0.106552	0.366813
beat-Ic	34.9154	41.0007	35.2849	40.0407	44.9055	31.7621	30.0227	35.5464	34.1026	37.2843	0.216636	5.45845	2.7007	0.103906	0.360964
beat-IIa	119.959	125.565	117.205	116.54	120.255	92.9431	102.469	103.383	105.666	105.701	0.232469	6.81697	8.35662	0.00484961	0.0517344
beat-IIb	39.4046	39.8359	44.6613	38.1441	36.0259	38.0104	33.7211	42.8728	32.8108	40.0806	0.0791643	5.39418	0.761624	0.385218	0.742002
beat-IIIa	0	0	0	0	0	0	0	0	0	0	0	-1.30545	0	1	1
beat-IIIb	55.1165	59.1715	67.1153	57.3215	76.8721	56.2345	53.9538	49.9278	57.3543	61.7055	0.174582	6.035	3.35852	0.0702723	0.287254
beat-IIIc	29.4287	27.2561	23.441	28.2393	32.9814	28.1172	26.1067	26.3206	24.2852	23.6755	0.138509	5.17535	0.925766	0.338627	0.686738
beat-IV	67.3369	64.9954	64.4011	65.7511	71.5443	59.619	52.4309	53.7267	63.0381	65.0611	0.183702	5.96346	5.26414	0.0241722	0.147511
beat-Va	55.3659	70.5864	25.415	51.6315	71.5443	44.7793	59.3927	76.2485	44.9534	52.7573	-0.0179018	5.36573	0.00683578	0.934297	1
beat-Vb	45.1407	38.6711	36.0251	35.1937	36.0259	31.7621	39.3776	35.2751	27.6437	31.8781	0.201634	5.03845	3.36532	0.0699938	0.286636
beat-Vc	25.4384	21.8981	26.1552	26.7641	20.55	26.0345	20.4502	26.3206	23.7685	26.099	-0.0202533	4.52598	0.040745	0.868966	1
beat-VI	49.6298	54.7452	49.5962	52.053	58.0981	42.4362	45.0341	52.9126	45.9868	54.9943	0.128536	5.81618	1.76576	0.187375	0.526054
beat-VII	141.657	121.138	112.023	135.928	144.357	113.771	82.0185	124.277	101.533	123.597	0.265072	6.98033	6.61286	0.011819	0.0950585
beg	11.7216	7.68763	10.6101	8.00815	11.1629	11.4552	11.9656	12.2106	9.8174	12.8631	-0.253011	3.45298	2.92021	0.0910347	0.343113
bel	151.383	175.185	169.515	160.374	170.235	200.986	132.056	190.485	187.564	191.455	-0.126171	7.42624	3.71813	0.0570795	0.250901
Bem46	27.1842	20.2674	16.7788	21.7063	22.3259	16.1414	20.2327	16.0095	21.7016	15.6594	0.270765	4.35199	3.9505	0.0499962	0.2307
ben	153.129	151.656	138.179	156.791	161.102	136.16	164.037	148.155	118.067	151.001	0.0840963	7.50506	0.783356	0.378551	0.733978
Best1	105.494	90.1549	83.4006	88.7219	92.348	78.6242	71.5759	74.349	72.3388	81.6526	0.280733	6.24789	13.791	0.000359686	0.00953482
Best2	60.8526	58.7055	63.6608	62.1685	58.0981	51.0276	59.8278	51.5559	66.655	56.2993	0.0884742	6.0499	0.826476	0.3658	0.718287
Best3	0	0	0.246747	0	0.507407	0.260345	0	0.271347	0	0.372843	-0.313645	-0.900544	0.11344	0.7372	1
Best4	0.249396	0	0	0	0.253703	0	0	0	0	0.186421	0.769979	-1.08695	0.348761	0.557064	0.929385
Bet1	14.465	17.006	15.7918	12.223	10.6555	15.881	23.7136	14.9241	12.1426	17.1508	-0.263435	4.04185	3.77176	0.0553537	0.245532
Bet3	17.9565	22.8299	27.8824	26.9748	22.3259	31.7621	37.8547	33.1043	20.6682	30.7595	-0.385787	4.65212	11.1208	0.00125516	0.0216808
Bet5	16.4601	17.4719	14.8048	18.9667	17.7592	12.2362	23.9311	15.7381	14.7261	18.0829	0.0061714	4.09454	0.00267472	0.958872	1
beta3GalTII	5.73611	6.05692	9.3764	7.37593	8.62591	6.76897	9.3549	6.78367	7.23388	11.1853	-0.169009	3.0068	1.08949	0.299469	0.637482
beta4GalNAcTA	36.6612	29.8187	25.1682	32.6648	33.7425	23.1707	29.37	23.6072	24.0268	21.8113	0.372991	4.84703	8.12795	0.00544029	0.0561034
beta4GalNAcTB	20.4505	13.7446	18.0126	14.9626	15.4759	17.7035	19.1449	13.8387	15.7595	13.2359	0.0516478	3.85381	0.161347	0.688903	1
beta4GalT7	8.23007	5.591	6.41543	6.11148	3.04444	9.37242	7.83201	6.78367	5.68376	6.15191	-0.279681	2.80728	1.75308	0.188951	0.528438
betaCOP	68.3345	91.3197	109.309	110.217	88.7962	127.309	79.843	117.493	123.234	115.208	-0.264922	6.88592	4.88171	0.0297638	0.168252
beta'COP	60.3538	67.325	71.8035	85.7715	70.5295	68.4707	58.7401	66.2086	68.9802	69.1623	0.102972	6.02063	1.7065	0.194877	0.538609
betaggt-I	24.6902	22.597	19.2463	26.3426	14.4611	22.1293	19.3625	19.537	23.5101	19.9471	0.0438547	4.45584	0.111299	0.739471	1
betaggt-II	43.1455	28.188	36.5186	37.3011	33.4888	49.4655	40.6829	42.0588	35.911	38.7757	-0.210788	5.11844	3.33381	0.0712934	0.290152
betaNACtes1	0	0	0	0	0	0	0	0	0	0.186421	-1.49026	-1.28433	1.85851	0.241564	0.559103
betaNACtes2	0	0	0	0	0	0.260345	0	0	0	0	-1.5232	-1.27608	1.71254	0.241564	0.559103
betaNACtes3	0	0	0	0	0.253703	0.260345	0	0	0	0	0.00901051	-1.23441	8.1996e-05	0.992817	1
betaNACtes4	0.249396	0	0	0	0	0	0.217556	0	0	0	0.0240091	-1.20276	0.000272473	0.991591	1
betaNACtes6	0	0	0	0	0.253703	0	0	0	0.258353	0	0.00966833	-1.24289	8.16328e-05	0.992837	1
beta-Spec	521.237	709.825	891.251	768.15	741.068	854.452	371.368	818.382	921.286	911.041	-0.094008	9.46634	0.507405	0.478167	0.853151
betaTry	0	0	0	0	0	0	0	64.3092	0	0	-8.92484	3.85975	10.6003	0.00177325	0.0267863
betaTub56D	506.274	486.417	541.857	502.827	493.707	532.145	615.03	497.65	503.271	533.165	-0.083308	8.82155	0.798983	0.373859	0.728002
betaTub60D	8.23007	20.9663	12.3374	37.0904	14.4611	21.3483	12.6182	11.3966	12.6593	13.7952	0.388746	3.9412	3.25211	0.0747862	0.299677
betaTub85D	0.997584	0.931834	1.23374	0.632222	2.02963	1.82241	0	1.89943	0.775058	0.932107	0.124427	0.635646	0.0650841	0.799235	1
betaTub97EF	117.216	109.723	134.971	126.234	106.555	131.995	122.266	127.262	127.368	139.07	-0.12382	6.86197	2.04879	0.155902	0.468267
bft	0	0	0	0	0	0	0	0	0	0	0	-1.30545	0	1	1
BG642163	0	0	0	0	0	0	0	0	0	0	0	-1.2267	0	1	1
BG642167	0	0	0	0	0	0	0	0	0	0	0	-1.27612	0	1	1
BG642312	0	0.232958	0	0.210741	0	0	0	0.271347	0	0.186421	0.0112834	-1.02147	0.000107706	0.991747	1
Bgb	35.1648	37.0404	37.9991	37.9333	34.7574	46.3414	49.1676	46.6717	39.2696	52.0116	-0.353505	5.29782	11.7422	0.000934234	0.017839
bgcn	0	0	0	0.632222	0.76111	0.260345	0.652667	0.81404	0	0.372843	-0.532595	-0.497191	0.379721	0.539358	0.919096
bgm	31.1745	63.1318	45.6483	73.3378	36.0259	53.1104	111.171	49.9278	39.2696	30.946	-0.186515	6.37912	0.293688	0.589249	0.954365
B-H1	7.73127	7.92059	7.40242	6.11148	6.34258	7.02931	6.52667	5.42694	6.20047	8.38896	0.0693623	2.92583	0.118306	0.762147	1
B-H2	3.49154	2.56254	8.38941	5.26852	3.29814	3.38448	3.48089	3.52751	3.61694	4.10127	0.338937	2.35437	1.50057	0.223883	0.559103
BHD	8.47946	4.89213	11.1036	9.90482	7.10369	8.59138	13.0533	9.22579	18.343	12.6767	-0.577353	3.3402	13.1003	0.000494674	0.011687
bi	34.1672	33.779	30.8434	36.0367	31.2055	33.8448	24.5838	37.1745	35.3943	35.7929	-0.00399244	5.11025	0.00143848	0.969832	1
BI-1	228.197	196.384	159.399	184.609	184.696	129.912	205.155	138.116	143.127	137.393	0.338066	7.31523	12.0296	0.000815734	0.0163411
bib	17.4577	14.6764	11.5971	15.3841	17.2518	15.3603	10.8778	16.8235	13.4343	17.3372	0.0479131	3.64004	0.101284	0.751055	1
bic	255.381	264.874	294.123	308.735	279.074	318.402	397.474	292.241	295.556	307.222	-0.200305	8.25718	5.87603	0.0174144	0.120717
BicC	0	0	0	0	0	0	0	0	0	0	0	-1.30545	0	1	1
BicD	105.744	116.945	127.568	129.606	141.313	104.919	94.8543	119.664	118.067	114.276	0.171306	7.00318	4.38384	0.0391853	0.202115
bif	385.566	418.16	465.612	433.283	451.846	379.583	202.327	401.322	426.024	408.636	0.245379	8.64232	7.44956	0.00767534	0.0709311
BigH1	0.249396	0.232958	0.740242	0	0.253703	0	0	0.271347	0	2.42348	-1.07468	2.04073	0.695497	0.40681	0.767526
bigmax	19.7023	14.6764	20.9735	17.2807	13.1926	22.3897	28.4998	19.8083	24.8019	23.4891	-0.473546	4.43549	8.15789	0.00535885	0.0555076
Bili	114.972	111.354	95.9847	99.0482	110.107	79.6655	93.7666	97.9562	86.2898	91.5329	0.242015	6.60801	7.71346	0.00670958	0.0647239
bin	0.249396	0.232958	0.740242	0	0.507407	0.260345	0	0.271347	0.516706	0.186421	0.463805	-0.794691	0.258175	0.612865	0.978567
Bin1	7.48188	9.08538	8.38941	6.53296	9.38702	8.07069	11.3129	10.5825	8.52564	9.32107	-0.230568	3.2448	1.16673	0.283053	0.617242
bin3	111.231	108.326	94.5042	101.577	103.004	103.878	67.0072	99.8556	103.599	101.786	0.124236	6.65091	2.49438	0.117875	0.391004
bip1	7.48188	10.949	8.14266	9.69408	8.37221	9.11207	10.4427	7.32636	10.3341	8.94823	-0.047488	3.41816	0.0690842	0.793295	1
bip2	331.447	325.21	243.54	287.029	312.816	190.312	212.987	222.776	228.384	197.234	0.512451	8.04774	22.913	6.86926e-06	0.00060244
Bka	6.48429	3.49438	5.92194	8.00815	7.3574	5.2069	9.57246	7.32636	5.94211	7.08401	-0.173355	3.01989	0.887328	0.348805	0.697719
bl	107.739	132.32	160.386	130.238	133.955	143.971	137.06	157.381	142.611	154.357	-0.14592	7.15134	4.25614	0.0420838	0.209751
blanks	0.249396	0.465917	0.246747	0	0	0	0.217556	0	0	0	1.58817	-0.916321	1.91665	0.170116	0.495565
Blimp-1	100.008	107.394	101.907	99.8911	108.331	89.819	54.8241	74.349	106.183	85.381	0.335135	6.64918	4.01546	0.0481897	0.225749
Blm	8.97825	9.78426	7.15567	8.85111	10.1481	10.9345	8.70223	8.41175	14.2094	12.3038	-0.281649	3.42503	2.26765	0.135715	0.429482
Blos1	13.9662	13.2786	15.5451	9.69408	16.237	19.0052	23.9311	16.0095	20.4099	21.0656	-0.555438	3.93662	12.2264	0.000743623	0.0153943
Blos2	8.47946	10.4831	10.6101	7.58667	7.6111	5.72759	11.748	9.49714	8.52564	10.9989	-0.0660332	3.20724	0.153724	0.695958	1
Blos3	12.9686	5.82396	9.3764	8.00815	8.37221	5.98793	10.8778	7.32636	6.20047	9.88033	0.126531	3.03186	0.507535	0.538965	0.918706
Blos4	8.97825	8.85242	7.40242	7.16519	7.6111	7.02931	8.70223	8.6831	5.16706	7.64328	0.0993747	2.98113	0.279545	0.598343	0.96393
blot	79.3079	74.3138	65.1413	69.9659	74.5888	63.5242	52.2134	51.0132	64.3298	64.3154	0.297683	6.06118	10.7337	0.00151094	0.0242961
blow	20.4505	15.8412	25.1682	23.8137	19.0278	23.6914	21.538	31.7476	21.96	23.1163	-0.222294	4.45103	2.60429	0.110189	0.374349
blp	16.9589	16.773	21.2203	16.8593	18.2666	17.1828	25.8891	19.2656	20.9266	15.8458	-0.138181	4.31232	1.25115	0.266406	0.59297
blue	56.3635	65.6943	63.9076	56.4785	67.4851	69.7724	40.6829	69.7361	72.5971	71.7722	-0.065643	5.86849	0.494698	0.483714	0.859747
blw	2903.22	2318.17	2811.19	2233.01	2393.69	2300.41	2415.3	2302.38	2227.26	2414.34	0.118622	11.0881	1.30371	0.256664	0.579531
BM-40-SPARC	118.463	149.326	175.437	186.084	119.748	206.453	297.399	219.52	167.929	206.741	-0.551442	7.43917	10.6575	0.0015673	0.024779
Bmcp	26.436	17.9378	18.506	21.0741	16.4907	32.0224	36.1143	34.7324	24.5435	25.9126	-0.607868	4.73414	27.0245	1.31017e-06	0.000181118
bmm	95.0198	95.0471	77.9722	78.1848	89.3036	63.2638	63.5263	60.7817	67.9468	48.8424	0.518612	6.41391	7.46329	0.0076217	0.0705915
bnb	241.665	255.555	365.186	279.442	276.537	545.683	444.031	556.261	461.676	516.201	-0.831266	8.4295	52.6763	1.53956e-10	6.96006e-08
bnk	0	0	0	0.210741	0	0	0	0	0	0	1.51439	-1.26169	1.43567	0.241188	0.559103
bnl	14.9638	16.0741	11.5971	11.5907	16.9981	10.9345	9.3549	6.78367	14.9845	14.168	0.331283	3.43006	3.00418	0.0865858	0.330969
BobA	0	0	0	0	0	0	0	0	0	0	0	-1.20567	0	1	1
boca	10.9734	16.0741	21.7138	16.8593	14.9685	26.5552	26.9769	24.9639	19.8932	26.6583	-0.634041	4.29884	16.1416	0.000124332	0.0045211
bocksbeutel	30.1769	28.4209	34.7914	30.9789	30.6981	20.3069	30.6754	24.1499	26.8687	26.6583	0.265699	4.56679	5.33361	0.0232818	0.143862
boi	8.72886	7.68763	6.41543	7.79741	7.10369	7.81035	5.4389	7.32636	6.20047	6.71117	0.176749	2.98297	0.653401	0.4211	0.784381
bol	229.195	249.964	196.904	249.939	280.596	172.869	139.453	199.169	174.646	209.538	0.429763	8.06304	10.3719	0.00179877	0.0269848
boly	0	0	0	0	0	0	0	0	0	0	0	-1.30545	0	1	1
bon	127.441	119.275	113.504	120.122	124.315	109.866	77.885	106.911	109.542	122.106	0.200013	6.74921	7.33154	0.00815316	0.0738375
bond	70.3296	62.4329	70.8165	63.8545	50.7407	54.4121	66.7896	55.6261	67.6884	46.9782	0.12778	6.07824	0.890302	0.348003	0.697323
bonsai	18.2059	15.1423	25.415	20.2311	16.7444	23.6914	35.4616	21.1651	25.5769	23.4891	-0.436718	4.41122	9.46124	0.00280332	0.035987
bor	39.654	38.9041	42.4405	44.2556	32.474	67.95	57.6523	60.239	62.7797	61.5191	-0.647335	5.64378	38.4951	1.7929e-08	4.7603e-06
bora	0	0	0	0	0	0	0	0.542694	0	0.745686	-3.5716	0.472976	3.87037	0.0532773	0.240337
borr	0	0.465917	0	0.210741	0.507407	0.260345	0.217556	0	0	0.932107	-0.387735	0.964198	0.10211	0.750113	1
boss	428.462	400.922	390.108	394.507	392.986	302.26	299.139	340.812	354.202	327.17	0.305922	8.30133	13.9179	0.000339359	0.00915557
botv	27.4336	23.2958	24.9215	28.0285	20.0426	21.869	23.7136	17.3662	22.735	22.7434	0.188528	4.61883	3.7534	0.055938	0.247212
bou	10.4746	10.0172	10.3634	8.42963	7.3574	8.07069	12.6182	8.95445	10.0758	9.32107	-0.0769792	3.57403	0.220628	0.639735	1
bowl	18.2059	20.0344	18.506	18.7559	23.087	20.8276	15.8816	16.0095	21.1849	15.2866	0.148488	4.43265	1.11022	0.294945	0.632993
BoYb	0	0	0.246747	0	0	0	0	0.81404	0	0.372843	-1.83154	0.233314	1.67504	0.199547	0.547542
br	49.131	50.552	47.3755	53.5282	54.5462	41.6552	23.9311	53.4553	52.1873	44.5547	0.245685	5.52028	4.50872	0.0365563	0.19333
Br140	22.1962	29.1198	25.9085	29.293	26.6389	30.2	19.1449	30.6622	38.2362	32.4373	-0.174214	4.95266	1.80117	0.183056	0.518101
brat	93.7729	94.5811	67.1153	88.0896	101.989	59.0983	50.6905	60.7817	71.8221	69.3488	0.514799	6.66327	11.8422	0.000891111	0.01737
Brca2	17.2083	17.2389	15.2983	18.7559	18.774	18.2241	17.1869	19.537	17.3096	20.3199	-0.0854545	4.1639	0.418894	0.51919	0.899016
Brd	0	0	0	0	0	0	0	0	0	0	0	-1.18369	0	1	1
Brd8	4.48913	7.22171	14.8048	14.5411	8.11851	14.0586	11.0953	13.8387	14.2094	16.9643	-0.506896	3.54538	5.62019	0.0199591	0.130637
Bre1	18.4553	33.3131	56.0116	31.4004	41.6074	52.069	34.3738	46.6717	54.2541	56.1128	-0.430534	5.48894	5.20074	0.0250163	0.150489
Brf	25.9372	32.1483	32.8174	29.9252	28.9222	38.7914	33.286	43.6868	34.1026	36.5386	-0.313425	5.07354	10.4608	0.00172318	0.0262808
brk	4.48913	7.68763	8.8829	9.90482	7.6111	11.1948	7.83201	11.9393	11.3675	10.8124	-0.450718	3.35116	6.26448	0.014183	0.10629
brm	68.8333	87.8254	106.842	86.8252	89.0499	110.647	64.179	101.484	120.392	101.973	-0.181121	6.56348	2.49405	0.117899	0.391004
Brms1	20.2011	21.6651	26.6487	20.4419	21.5648	32.2828	39.3776	40.9734	31.519	27.5904	-0.633718	4.81379	22.6959	7.51222e-06	0.000632213
brn	3.99033	4.19325	2.96097	4.21482	2.53703	5.46724	3.916	2.98482	6.20047	4.84696	-0.379211	2.31071	2.51827	0.116154	0.387462
Bro	0	0	0	0	0	0	0	0	0	0	0	-1.25585	0	1	1
brp	580.344	676.977	744.93	708.721	735.74	687.31	323.941	793.418	760.074	807.95	0.0314855	9.50698	0.0734638	0.786999	1
bru	61.102	64.2965	52.5572	65.3296	67.4851	66.9086	41.118	52.0986	54.2541	57.9771	0.191498	5.90755	5.84406	0.0177128	0.121608
bru-2	51.625	53.1145	38.7393	42.9911	55.8147	32.0224	32.8509	28.2201	35.3943	28.7089	0.623872	5.24611	23.8654	4.65053e-06	0.000463033
bru-3	229.444	229.464	215.657	246.145	264.866	167.402	142.499	241.227	201.774	222.401	0.281858	8.05128	4.22698	0.0427771	0.210513
Bruce	389.058	409.075	344.706	367.11	388.674	344.957	197.323	331.314	427.574	354.387	0.198014	8.57699	4.81951	0.0307961	0.17196
brv1	0	0	0	0	0	0	0	0	0	0	0	-1.30545	0	1	1
brv2	0	0.232958	0	0	0	0	0	0	0	0	1.52435	-1.04019	1.50378	0.236514	0.559103
brv3	0.249396	0.465917	0	0	0.253703	0	0	0	0	0.745686	0.0915248	-0.747445	0.0055427	0.940823	1
BRWD3	71.0778	87.3594	96.2315	89.1433	101.228	102.055	37.6372	96.0568	105.15	105.701	-0.00373181	6.40579	0.00113449	0.973208	1
bs	20.4505	17.9378	15.7918	15.3841	17.2518	14.0586	18.4922	18.4516	17.568	15.2866	0.0497085	4.17514	0.145947	0.703369	1
bsf	64.0948	87.8254	100.179	93.1474	79.6629	134.338	107.255	117.765	126.076	136.46	-0.548912	6.82779	38.9242	1.53983e-08	4.22241e-06
Bsg	403.024	406.746	413.055	431.808	456.159	304.343	364.406	397.794	358.077	362.59	0.240034	8.82922	7.10253	0.00917104	0.0799395
Bsg25A	0	0	0	0	0	0	0	0	0	0	0	-1.2771	0	1	1
Bsg25D	49.131	58.4726	72.5437	63.0115	68.4999	71.5948	47.2096	63.4952	75.6974	74.3821	-0.0925	6.12482	0.631919	0.428811	0.792741
bsh	5.9855	3.72734	4.93495	4.00407	3.04444	5.46724	8.04956	5.69828	4.392	5.77906	-0.443811	2.32454	4.24833	0.0422683	0.209883
bsk	219.468	218.282	179.385	189.667	235.437	155.686	230.392	183.702	161.987	174.863	0.200326	7.49941	5.37151	0.0228108	0.142163
bt	1891.42	1460.18	1203.14	1109.34	1428.86	963.276	766.449	850.944	1121.77	987.101	0.596889	10.0845	13.0011	0.000517951	0.0120824
BTBD9	75.0682	49.1542	67.1153	50.1563	62.6647	53.1104	38.0723	54.5407	53.7374	51.2659	0.278779	5.62515	8.37	0.00481719	0.0514964
BtbVII	162.357	169.827	175.684	163.113	155.774	177.816	97.2474	167.692	152.686	179.337	0.0940619	7.34398	1.79676	0.183587	0.519078
btd	0.997584	1.16479	1.97398	0.842963	1.01481	1.04138	0.870223	2.17077	1.80847	1.86421	-0.367578	0.789783	0.826048	0.365924	0.718405
Btd	0	0	0.246747	0.421482	0	0.260345	0	0.271347	0.516706	0.559264	-1.07682	-0.630858	1.26102	0.264541	0.590469
Bteb2	0	0	0	0	0	0	0	0	0	0	0	-1.29099	0	1	1
BthD	0	0	0	0	0	0	0	0.81404	0	0.745686	-3.78392	0.369734	5.215	0.0249425	0.150239
Btk29A	23.6926	29.5857	35.0381	37.5119	35.5185	33.0638	26.9769	28.7628	30.2273	26.4718	0.152958	5.25116	2.09473	0.151394	0.459148
btl	16.2107	11.6479	18.7528	14.9626	12.6852	14.5793	9.3549	12.2106	12.4009	10.0668	0.347926	3.50501	4.85739	0.030163	0.169933
btn	0	0	0	0	0	0	0	0	0	0	0	-1.26416	0	1	1
btsz	243.909	248.101	249.462	277.546	280.85	248.89	143.804	221.419	278.246	249.991	0.186815	7.99335	5.41193	0.0223195	0.140222
btv	5.73611	4.42621	3.45446	3.58259	3.55185	3.38448	1.52289	4.6129	4.13364	4.10127	0.229873	2.29957	0.437153	0.510244	0.888769
btz	39.1552	41.6996	57.4921	48.8919	45.9203	56.7552	38.0723	51.8272	54.7708	57.9771	-0.153199	5.59632	1.68286	0.197967	0.54419
Bub1	21.6974	21.8981	25.415	21.917	26.1314	19.2655	16.7518	28.2201	23.5101	26.099	0.0397336	4.68366	0.102925	0.749115	1
Bub3	14.7144	15.1423	15.2983	16.8593	15.9833	15.881	22.1907	16.5522	13.6927	13.9816	-0.0774075	4.11139	0.278007	0.59935	0.964919
BubR1	5.23731	8.61946	12.8309	4.21482	8.62591	6.24828	4.35112	8.95445	3.35859	10.2532	0.232684	3.15569	0.809381	0.370782	0.724265
Buffy	28.1817	28.8869	27.1422	30.7682	23.8481	22.3897	25.0189	19.537	24.5435	19.7607	0.320957	4.19936	6.24288	0.014345	0.107263
bun	546.925	608.255	578.622	594.078	648.212	514.962	459.913	590.179	550.033	575.11	0.145742	9.21542	4.10762	0.0457462	0.218503
bur	89.0343	103.201	93.5172	101.999	89.811	92.6828	99.6406	87.3737	92.7486	97.4984	0.0229612	6.51203	0.0920171	0.762351	1
Burs	0	0	0	0	0	0	0	0	0	0	0	-1.24941	0	1	1
bves	92.0271	90.6209	77.2319	89.3541	104.779	70.8138	83.759	84.9316	79.3143	84.4489	0.170134	6.65787	3.5097	0.0643612	0.270574
bw	39.4046	28.188	36.7654	43.4126	35.5185	33.8448	33.0685	35.0037	39.0113	28.3361	0.118988	5.4188	0.897156	0.346164	0.695863
bwa	81.5525	84.7969	60.9466	62.59	78.1406	55.1931	64.3965	49.3851	47.0202	52.9437	0.450315	6.02223	18.4178	4.5786e-05	0.00220924
Bx	68.5839	73.3819	68.1023	75.2345	80.9314	78.1035	58.5225	84.9316	78.0225	84.8217	-0.0692686	6.40274	0.720664	0.398251	0.757769
Bx42	28.6805	26.0914	37.5056	31.8219	31.2055	41.9155	35.0265	40.702	45.2117	41.7584	-0.396898	5.24679	8.11659	0.00547151	0.0562865
bxd	0	0	0	0	0	0	0	0	0	0	0	-1.29076	0	1	1
by	163.853	161.673	157.918	147.308	168.966	129.131	114.217	117.222	138.994	126.021	0.354204	7.03783	27.6951	1.00641e-06	0.000147669
byn	0	0	0	0	0	0	0	0	0	0	0	-1.21322	0	1	1
bys	9.47704	13.0457	14.3113	15.5948	13.1926	16.9224	14.1411	17.9089	16.0179	19.2014	-0.356974	3.85998	4.89784	0.0295023	0.167396
Bzd	26.9348	21.8981	26.6487	22.1278	21.0574	23.431	25.6716	23.0645	23.7685	27.9632	-0.0662105	4.29684	0.295586	0.588051	0.953317
c11.1	88.5356	102.036	104.127	100.313	96.1536	103.617	60.0454	85.2029	109.542	94.5157	0.118316	6.56386	2.13776	0.147307	0.452426
c12.1	20.6999	18.4037	21.467	24.8674	25.1166	23.6914	27.1945	21.7077	24.2852	21.8113	-0.102147	4.51561	0.748654	0.389278	0.746982
c12.2	33.4191	30.7505	37.7523	36.8796	38.5629	49.4655	31.5456	39.888	40.0447	42.3177	-0.195341	5.24462	2.27616	0.134993	0.427495
C15	1.74577	0.465917	1.72723	2.52889	1.77592	2.60345	0.870223	1.35673	2.06682	1.67779	-0.0380291	1.10264	0.0108012	0.95543	1
C1GalTA	59.1068	62.4329	56.2584	60.0611	64.1869	59.8793	62.0034	66.7513	62.7797	63.1969	-0.0586437	5.83065	0.703439	0.403925	0.764391
c(2)M	0.249396	0.232958	0	0	0	0	0	0.542694	0.258353	0.186421	-0.831339	-0.302006	0.464087	0.497708	0.873757
c(3)G	7.48188	7.92059	10.1166	11.8015	10.4018	8.07069	9.13734	12.482	10.3341	5.77906	0.0761114	3.28219	0.130913	0.718363	1
C3G	191.536	198.947	176.178	181.026	206.768	168.183	108.125	182.074	168.188	179.897	0.2434	7.45446	10.9124	0.00138675	0.0230251
C901	0.249396	0.465917	0.246747	0.632222	0	1.04138	0.435112	1.08539	2.06682	0.559264	-1.54541	0.409203	7.53657	0.00762981	0.0706275
ca	140.161	146.997	123.62	124.548	135.224	138.503	67.2247	130.246	136.152	155.103	0.0964316	6.92349	1.29424	0.258386	0.582204
Ca-alpha1D	605.284	614.079	501.391	528.116	606.097	502.726	230.392	499.007	554.167	561.688	0.28218	9.11176	7.16314	0.00888935	0.0783272
Ca-alpha1T	797.069	942.55	727.658	834.112	893.797	741.723	267.376	814.583	806.836	888.112	0.253864	9.78961	4.79228	0.0312599	0.173586
Ca-beta	323.217	318.687	251.682	275.438	318.144	239.257	166.865	309.064	253.186	294.359	0.236119	8.16195	5.55246	0.0206964	0.133938
CaBP1	41.6491	55.2112	44.4145	50.9993	50.9944	48.9448	64.6141	46.129	47.0202	46.6054	-0.0588498	5.5527	0.183794	0.66919	1
cac	412.251	446.814	402.938	438.973	495.483	344.697	238.006	384.227	371.253	389.621	0.346368	8.93491	10.9995	0.00133011	0.0225189
cact	124.449	136.514	152.983	137.614	136.746	139.805	118.785	135.945	145.969	126.767	0.0455019	7.15203	0.241931	0.624051	0.988544
cactin	5.9855	7.22171	16.2853	14.5411	11.6704	19.7862	12.6182	14.9241	19.8932	21.0656	-0.661385	3.95013	7.20498	0.00870018	0.0771648
cad	0.997584	0.698875	1.48048	1.26444	0.253703	1.04138	1.08778	1.35673	0.775058	0.932107	-0.122874	1.36677	0.0316395	0.859254	1
Cad74A	8.47946	6.52284	7.64917	6.53296	6.34258	7.81035	6.96179	8.41175	8.00894	8.38896	-0.156813	3.10794	0.860648	0.356119	0.707039
Cad86C	14.7144	11.6479	20.48	14.7519	14.7148	13.0172	8.70223	15.1954	12.4009	13.6088	0.279945	3.96245	2.85282	0.094788	0.346336
Cad87A	108.737	117.411	105.114	100.945	100.467	97.1086	59.8278	81.9467	91.4569	105.515	0.28893	6.466	12.9804	0.000522965	0.0120824
Cad88C	1.24698	2.09663	2.46747	1.47519	2.53703	0.781035	2.39311	1.62808	1.80847	1.49137	0.261009	0.938797	0.536685	0.465775	0.838592
Cad89D	2.24456	1.63071	3.70121	3.79333	1.77592	4.68621	2.39311	2.17077	3.87529	3.16916	-0.294068	1.75696	0.773068	0.381687	0.737493
Cad96Ca	37.16	32.6142	32.3239	38.1441	39.0703	26.2948	27.6296	30.9335	22.735	24.0484	0.447424	4.81902	18.3472	4.72092e-05	0.00223702
Cad96Cb	0.997584	0.931834	2.22073	1.89667	1.26852	0.52069	1.52289	0.81404	1.55012	2.23706	0.0998049	1.059	0.0619239	0.852255	1
Cad99C	38.9058	31.6824	43.4275	43.8341	40.0851	42.4362	26.7594	39.6166	44.4367	37.0979	0.0599351	5.27878	0.267669	0.60621	0.971625
CadN	302.268	334.761	272.656	312.529	325.248	278.829	156.205	268.091	321.908	290.258	0.234963	8.29205	4.79268	0.031253	0.173586
CadN2	75.0682	90.1549	79.6994	83.6641	87.7814	69.5121	44.1638	80.59	81.6395	84.4489	0.20921	6.29508	5.22341	0.0247109	0.149371
Caf1	26.6854	30.2846	28.1292	22.9707	25.3703	27.0759	32.4158	32.0189	28.1605	29.641	-0.163362	4.79206	1.33368	0.251308	0.571805
Caf1-105	2.99275	3.49438	4.93495	5.05778	4.56666	5.98793	5.22134	7.32636	5.94211	7.64328	-0.606213	2.72014	3.08699	0.082432	0.321041
Caf1-180	0.748188	2.32958	1.72723	1.47519	1.77592	2.60345	2.17556	4.0702	2.32517	3.91485	-0.89724	2.46432	2.64744	0.107326	0.368104
cag	12.9686	8.85242	11.1036	8.64037	10.1481	13.0172	15.8816	9.49714	10.3341	12.1174	-0.243594	3.58228	2.93738	0.0901048	0.340882
CAH1	325.212	311.931	322.005	331.917	298.609	299.397	302.62	290.341	296.589	299.952	0.0944812	7.83682	1.98888	0.162017	0.48025
CAH2	236.178	150.491	188.268	153.841	177.846	140.847	179.266	150.055	177.488	158.458	0.168637	7.41991	2.87392	0.0935945	0.34456
CAHbeta	9.22765	13.2786	9.12965	12.0122	10.4018	15.1	16.9694	14.3814	10.3341	7.45686	-0.237079	3.83648	1.35226	0.248057	0.567978
cal1	22.695	23.5288	28.8694	28.0285	26.8926	24.2121	25.6716	28.7628	32.0357	29.641	-0.109681	4.86139	0.514505	0.475113	0.849539
CalpA	144.4	137.678	137.685	120.333	130.911	120.019	136.625	122.92	117.809	134.783	0.0849807	7.00248	1.59238	0.210352	0.559103
CalpB	86.5404	87.3594	77.7254	83.2426	83.7221	82.5293	73.0988	64.0378	78.2809	78.8563	0.151173	6.29702	5.02892	0.0274643	0.159678
CalpC	5.9855	6.52284	10.1166	11.38	5.83518	6.76897	6.09156	5.69828	9.3007	9.50749	0.0917135	3.2913	0.305423	0.581917	0.948059
Cals	597.303	591.249	361.238	550.876	700.475	281.172	386.597	328.601	337.15	325.678	0.755249	9.10136	15.8541	0.000141332	0.00499802
Calx	613.763	569.118	489.547	534.228	574.638	411.085	276.949	422.216	413.881	438.463	0.503069	8.95314	30.1947	3.82189e-07	6.59059e-05
calypso	7.48188	12.5798	10.3634	14.9626	11.9241	15.881	14.3587	12.482	14.2094	17.3372	-0.372193	3.74234	6.37905	0.0133552	0.102332
Cam	2047.04	2302.1	2802.8	2596.96	2702.7	2249.38	2744.25	2943.57	2339.38	2648.3	-0.0538293	11.4915	0.246279	0.620957	0.985876
CaMKI	603.289	598.237	428.6	520.108	548.76	369.169	521.699	430.356	417.756	383.282	0.34673	9.11899	8.57966	0.0043375	0.0477324
CaMKII	779.612	762.706	547.286	643.181	770.497	441.285	593.927	547.849	480.278	559.637	0.417229	9.60651	5.87899	0.017387	0.120669
Camta	174.577	217.117	192.463	218.749	227.572	167.662	107.037	185.059	199.19	208.606	0.248521	7.66584	5.91023	0.017101	0.119294
can	0	0.232958	0	0.632222	0	0	0.217556	0.271347	0.516706	0	-0.0254822	-0.23872	0.000521963	0.983184	1
cana	21.6974	20.0344	28.6227	25.7104	23.5944	20.0466	16.0991	20.8937	27.6437	18.4557	0.219844	4.62962	1.73567	0.191141	0.532295
CanA1	30.9251	19.1026	24.1812	21.2848	26.1314	15.881	14.5762	17.6375	11.6259	15.473	0.690975	4.25443	22.8969	6.91507e-06	0.00060244
CanA-14F	135.173	141.173	138.179	148.151	164.146	120.54	79.1903	128.076	133.827	142.053	0.267904	7.30728	5.86838	0.0174853	0.120958
CanB	176.572	170.992	157.425	162.903	188.248	146.574	203.197	174.476	148.294	159.017	0.0414698	7.33649	0.265087	0.60795	0.973406
CanB2	86.5404	80.3707	82.1669	88.9326	88.2888	80.9673	103.774	83.8462	67.4301	87.8045	0.00694195	6.6123	0.00819151	0.928092	1
Cand1	50.378	59.1715	63.9076	55.8463	63.9332	61.7017	55.0416	62.9525	58.9044	63.5697	-0.0435256	5.87151	0.343639	0.559251	0.931185
Cap	25.6878	36.8074	65.1413	40.2515	36.787	50.2466	44.1638	65.9373	57.096	63.1969	-0.454973	5.59466	7.10038	0.0091812	0.0799564
CAP	494.802	503.656	536.182	505.989	534.553	580.309	353.746	554.633	574.06	584.245	-0.0395533	8.98902	0.256728	0.613656	0.978983
Ca-P60A	6830.46	4458.13	4376.8	3650.24	4187.63	3363.66	3472.63	3395.91	2930.24	3695.43	0.479391	11.7682	6.81694	0.0106295	0.0884135
Capa	65.8405	81.7684	79.4526	79.66	71.5443	85.9138	101.381	72.7209	68.4635	93.2107	-0.15843	6.06979	1.13792	0.289037	0.625126
CapaR	1.74577	1.86367	2.46747	0.842963	3.55185	1.04138	1.30533	1.08539	1.80847	1.49137	0.60837	0.856006	2.28639	0.13413	0.425567
Cap-D2	3.99033	1.39775	2.96097	3.58259	4.31296	3.12414	1.08778	6.24098	5.16706	3.16916	-0.185045	2.23112	0.206844	0.650383	1
Cap-D3	12.7192	16.0741	16.2853	13.0659	16.4907	16.1414	13.9236	15.4668	17.568	13.6088	-0.0363888	3.95814	0.107886	0.804312	1
Cap-G	17.2083	19.1026	21.2203	19.3882	22.3259	26.2948	17.4045	27.9487	27.3854	23.6755	-0.301903	4.49372	3.83404	0.0534197	0.240719
Cap-H2	52.6225	52.8816	54.7779	48.4704	55.3073	50.2466	47.2096	49.9278	40.8197	55.3672	0.114231	5.74744	1.88495	0.173294	0.500897
Capr	52.3731	59.1715	90.803	68.28	74.3351	122.622	70.7056	108.539	114.45	121.547	-0.640447	6.74775	21.9818	1.00978e-05	0.000774801
caps	122.204	120.905	100.179	107.899	102.242	89.5586	65.2667	86.5596	101.274	87.4316	0.364835	6.57661	15.6559	0.000154434	0.00525008
Caps	876.128	912.033	655.608	785.009	942.001	535.269	552.374	666.156	641.49	654.712	0.451456	9.5513	15.2534	0.000185023	0.00588379
capt	222.212	188.463	195.177	183.134	188.248	192.135	164.69	190.757	199.19	196.675	0.0507284	7.39815	0.553318	0.458965	0.830772
capu	126.444	146.298	114.984	120.754	154.759	146.574	65.0492	128.89	126.076	138.698	0.132526	6.91229	1.63155	0.20488	0.556788
car	19.9517	22.8299	23.1942	27.8178	27.6537	27.5966	28.2823	31.4762	28.9355	30.946	-0.27668	4.97047	6.9207	0.0100734	0.085014
cas	0	0	0	0.210741	0	0	0	0	0	0	1.51688	-0.292473	1.28876	0.259701	0.584266
Cas	30.1769	28.8869	26.6487	27.3963	27.4	24.7328	23.7136	26.3206	34.1026	21.0656	0.117623	4.78944	0.315959	0.575489	0.941346
CASK	343.169	421.888	369.627	396.403	376.242	375.678	215.38	394.538	405.355	405.28	0.086947	8.45988	0.902532	0.34473	0.694097
casp	58.1092	60.3363	73.5307	61.9578	61.9036	68.9914	69.8354	68.3794	65.6216	68.9759	-0.114327	6.01221	2.30691	0.132419	0.421899
Cat	230.442	178.213	218.371	217.906	167.191	181.46	191.449	177.461	145.969	137.765	0.279679	7.71688	5.18322	0.025255	0.15163
cathD	413.997	366.91	312.876	340.136	326.77	343.135	452.299	361.163	333.792	350.845	-0.0647475	8.41005	0.417159	0.520055	0.899746
cato	0	0	0	0	0	0	0	0	0	0	0	-1.30545	0	1	1
Catsup	25.9372	33.779	43.1808	38.7763	42.6222	37.4897	45.0341	33.1043	39.0113	34.1151	-0.0348866	5.30721	0.106095	0.745415	1
caup	12.9686	10.949	11.3504	8.21889	11.9241	14.8397	9.13734	12.2106	12.6593	13.9816	-0.18431	3.59455	1.12564	0.291637	0.628716
cav	3.99033	3.72734	4.44145	4.00407	3.80555	4.68621	6.52667	4.0702	3.35859	4.84696	-0.24369	2.49615	0.762613	0.384911	0.741924
caz	72.3248	73.3819	65.1413	75.8667	82.7073	72.6362	66.137	82.2181	57.6127	86.4995	0.0158152	6.24674	0.0357196	0.924359	1
cbc	16.9589	19.3356	18.9995	17.07	18.5203	18.4845	18.0571	14.6527	18.0847	17.71	0.0611298	3.99805	0.220472	0.639853	1
Cbl	102.003	90.8538	91.2965	91.4615	106.048	95.2862	70.7056	99.3129	96.8823	98.4305	0.0647	6.61251	0.762765	0.384864	0.741918
CBP	5.9855	7.68763	4.93495	3.58259	5.07407	2.86379	2.61067	1.62808	2.32517	2.79632	1.13231	2.72876	8.91102	0.00367807	0.0431741
Cbp20	16.4601	12.3468	17.0256	14.5411	13.9537	19.0052	24.1487	23.3358	14.9845	18.4557	-0.427757	3.99989	10.6528	0.00157089	0.0248123
Cbp53E	419.733	442.155	390.108	423.589	451.085	299.397	376.372	405.935	326.816	375.453	0.25334	8.77543	6.71214	0.0112239	0.0920302
Cbp80	36.1624	34.4779	41.7003	37.9333	38.8166	36.969	36.1143	36.0891	41.0781	39.5213	-0.00584394	5.32311	0.00481199	0.944855	1
cbs	31.1745	32.3812	46.882	36.8796	34.25	54.1517	48.5149	56.4401	51.4122	56.4857	-0.556037	5.50802	15.8674	0.000140497	0.004979
Cbs	57.6105	61.2681	60.2063	66.1726	54.2925	76.8017	70.2705	73.8063	66.655	78.8563	-0.290188	5.67539	4.48393	0.0370629	0.195014
cbt	72.3248	85.7287	103.387	87.0359	91.8406	87.7362	105.079	89.0018	92.2319	89.1094	-0.0734087	6.62421	0.568388	0.452932	0.82323
cbx	31.6733	32.8471	29.6097	28.0285	26.8926	29.419	38.0723	23.6072	23.2517	23.8619	0.106904	4.76672	1.18139	0.28007	0.612652
Cby	0	0.232958	0.246747	0.210741	0.507407	0	0.435112	0.271347	0.258353	0.372843	-0.199968	-0.394328	0.0532013	0.818124	1
CCAP	2.49396	1.39775	1.48048	2.52889	1.26852	1.56207	1.958	1.35673	2.58353	2.42348	-0.111674	1.23557	0.100673	0.751782	1
CCAP-R	4.98792	6.98875	4.6882	4.42556	3.55185	2.60345	5.00378	2.71347	2.84188	3.91485	0.509779	2.01276	3.47204	0.0657813	0.274275
CCDC151	0	0	0.740242	0	0	0	0	0	0	0.186421	1.24891	-0.797355	1.06436	0.305214	0.645588
Ccdc56	0	0	0	0	0	0	0	0	0	0	0	-1.30545	0	1	1
CCHa1	3.74094	3.96029	5.18169	4.21482	7.3574	6.50862	7.3969	7.59771	5.16706	5.03338	-0.373289	2.399	2.19353	0.142197	0.442794
CCHa1-R	14.7144	16.773	10.6101	11.1693	11.1629	8.59138	11.9656	7.05502	8.00894	11.3717	0.440651	3.47898	6.16745	0.0149261	0.110132
CCHa2	16.9589	17.9378	16.5321	22.9707	18.774	12.4966	33.7211	26.3206	25.0602	13.2359	-0.243442	5.21891	0.600997	0.440296	0.807193
CCHa2-R	9.22765	12.8127	9.12965	6.53296	8.11851	8.07069	8.70223	7.59771	6.45882	9.69391	0.16696	2.9004	0.750823	0.388594	0.746194
Cchl	118.962	120.44	164.827	135.506	122.031	146.835	154.247	142.728	142.611	147.459	-0.149374	7.05747	2.13046	0.147992	0.453085
CCKLR-17D1	13.4674	11.8809	12.5841	11.5907	10.9092	9.37242	7.61445	12.482	14.9845	13.9816	0.0477917	3.59733	0.0963153	0.757038	1
CCKLR-17D3	22.1962	20.2674	18.2593	17.07	19.0278	17.4431	13.2709	13.8387	16.5346	18.0829	0.286829	3.97766	3.90181	0.0513977	0.235542
Ccm3	48.8816	51.2509	55.2714	57.9537	72.8129	45.0397	61.7858	52.6413	47.7953	47.351	0.167408	5.98781	2.13872	0.147218	0.452335
Ccn	47.3852	60.3363	62.6738	56.6893	50.487	60.1397	56.5645	56.7115	50.3788	68.4167	-0.0755383	5.85112	0.738265	0.392574	0.750757
Ccp84Aa	0.498792	0.931834	0.986989	1.26444	1.01481	0.260345	0.435112	0.271347	1.03341	0	1.25374	0.501346	1.60515	0.20855	0.559103
Ccp84Ab	1.99517	0.232958	2.22073	2.73963	2.02963	0.52069	1.08778	1.08539	1.03341	0.559264	1.10132	1.31987	1.87008	0.174981	0.504466
Ccp84Ac	0	0	0	0.210741	0	0	0	0	0	0	1.51444	-1.24106	1.70878	0.236514	0.559103
Ccp84Ad	0.249396	0	0	0	0	0	0	0.271347	0	0	0.00425664	-1.04854	2.15015e-05	0.996316	1
Ccp84Ae	0	0	0	0	0	0	0	0.271347	0	0.186421	-2.22759	-1.17294	2.75954	0.102791	0.35858
Ccp84Af	0	0	0	0	0	0	0	0	0	0	0	-1.29805	0	1	1
Ccp84Ag	2.74336	3.26142	2.22073	1.89667	2.28333	3.64483	3.916	3.52751	3.87529	4.84696	-0.681407	1.99316	4.4391	0.037998	0.198313
Ccs	12.2204	11.6479	15.5451	13.9089	7.8648	14.8397	18.2747	14.9241	15.5012	12.6767	-0.312108	3.73568	4.54013	0.0359253	0.190829
Cct1	141.657	168.662	147.308	156.159	150.446	158.81	122.484	154.939	144.419	168.711	0.0284428	7.25654	0.152836	0.696794	1
Cct2	70.579	80.1377	97.7119	87.0359	89.0499	102.055	110.736	94.9714	88.8733	88.923	-0.193721	6.12131	3.15795	0.0790462	0.311547
Cct5	30.6757	37.2734	41.7003	40.2515	32.474	45.3	43.2936	37.1745	46.7618	42.8769	-0.23906	5.46661	2.43919	0.121961	0.399881
Cctgamma	22.9444	36.3415	37.9991	35.8259	33.4888	46.8621	28.7174	37.4459	42.1115	42.1312	-0.241112	5.33523	2.35089	0.128833	0.4149
c-cup	0	0	0	0	0	0	0	0	0	0	0	-0.936187	0	1	1
Ccz1	17.2083	17.006	17.2723	22.9707	21.8185	18.7448	22.1907	18.7229	20.1515	21.0656	-0.068279	4.2839	0.328139	0.568232	0.93523
cd	11.7216	9.5513	10.8569	7.37593	7.6111	11.7155	12.6182	7.32636	10.0758	9.69391	-0.133148	3.77093	0.463189	0.497941	0.873816
CD98hc	349.902	377.626	367.9	379.966	354.17	441.285	483.627	405.121	421.632	444.242	-0.263389	8.64963	19.1971	3.27274e-05	0.00172691
Cda4	1.24698	0.465917	0.986989	2.52889	0.76111	1.04138	0.652667	1.62808	0.258353	0.559264	0.578871	0.982132	1.10226	0.296673	0.635546
Cda5	115.221	122.303	106.595	125.18	120.509	89.0379	64.8316	89.0018	90.9402	90.9736	0.474313	7.14121	18.7975	3.88608e-05	0.00198178
Cda9	0.997584	0.232958	0.740242	0.842963	2.28333	0.781035	0.870223	0.542694	1.80847	1.67779	-0.190385	0.636625	0.122169	0.727537	1
CDase	51.1262	68.9557	74.7644	59.2182	60.6351	74.4586	77.4499	84.3889	79.0559	94.7021	-0.382836	5.87697	15.4078	0.000172617	0.00560654
cdc14	121.206	125.099	113.504	120.965	118.479	108.564	87.0223	109.624	106.183	109.057	0.20388	7.02542	8.2237	0.00518434	0.0545056
Cdc16	15.7119	16.3071	14.0646	14.3304	16.9981	11.4552	15.8816	13.5673	13.176	14.5409	0.168309	3.89474	1.35089	0.248295	0.568158
cdc2	0.997584	0.465917	0.246747	0.210741	0.76111	0.781035	0.652667	0.81404	0.258353	1.30495	-0.556868	1.39423	0.392987	0.532372	0.912115
Cdc23	4.73852	3.96029	5.42844	3.16111	3.80555	4.94655	5.87401	5.69828	6.45882	6.33833	-0.481208	2.47053	3.44347	0.0668816	0.277966
Cdc27	38.9058	44.961	54.7779	53.1067	51.2481	58.3173	43.5112	52.0986	55.5458	55.5536	-0.123975	5.59861	1.49696	0.224437	0.559103
cdc2c	12.2204	8.85242	10.3634	8.21889	8.37221	10.9345	10.4427	7.05502	10.5925	11.5581	-0.0837372	3.31233	0.113443	0.737068	1
cdc2rk	15.9613	16.3071	13.0776	13.6981	10.9092	10.6741	18.2747	12.2106	10.8508	14.168	0.072541	3.68698	0.300813	0.638464	1
Cdc37	17.9565	26.3243	38.7393	30.7682	25.8777	36.1879	46.1218	34.1897	34.6193	41.3856	-0.464631	5.15592	6.16969	0.0149085	0.11005
Cdc42	111.979	107.161	101.907	103.263	124.061	97.8897	124.877	101.484	95.5905	101.227	0.0726356	6.67131	1.28868	0.259404	0.58399
CDC45L	11.2228	14.6764	9.62315	13.0659	11.4167	12.4966	9.3549	13.0246	12.1426	14.168	-0.0258307	3.87373	0.0150853	0.90253	1
Cdc5	19.7023	15.1423	27.6357	25.9211	23.8481	29.1586	15.8816	26.0493	30.2273	27.9632	-0.200459	4.67973	1.42147	0.236397	0.559103
Cdc6	0	0	0.246747	0	0	0	0.217556	0.81404	0.258353	0.559264	-2.45027	0.96099	3.10556	0.0815305	0.31871
Cdep	375.59	438.661	367.654	425.907	442.459	353.548	214.945	361.163	424.99	390.926	0.232405	8.58972	5.845	0.017704	0.121608
CdGAPr	75.3176	92.0186	79.6994	83.2426	76.3647	80.4466	42.4234	77.6052	87.3232	77.5513	0.156831	6.32206	2.75185	0.100736	0.353372
cdi	113.974	146.065	126.335	134.663	138.015	116.114	70.9232	101.212	126.335	112.226	0.324116	7.01822	11.8296	0.000896412	0.0174031
Cdk12	52.8719	58.0067	58.7259	52.2637	62.1573	68.731	49.3852	67.0227	67.9468	67.1117	-0.172372	5.94411	5.58789	0.0203073	0.132325
Cdk4	19.2035	19.8015	19.9865	17.2807	16.237	13.5379	18.7098	19.537	12.4009	13.9816	0.243433	4.35087	2.63063	0.108432	0.370782
Cdk5	21.448	20.7333	20.2333	22.3385	23.087	22.9103	33.286	26.8633	18.0847	21.6249	-0.188047	4.57173	3.06319	0.0836028	0.324009
Cdk5alpha	235.929	244.141	238.851	226.968	246.853	206.974	239.529	231.187	225.542	231.349	0.0718478	7.77097	1.37295	0.244497	0.563166
Cdk7	6.98309	7.68763	10.3634	7.37593	12.1778	6.76897	7.83201	8.1404	8.26729	8.38896	0.171336	3.21356	0.762165	0.38505	0.742002
Cdk8	2.74336	4.19325	4.44145	4.42556	3.55185	4.94655	6.30912	4.34155	6.71717	3.35559	-0.393824	2.2188	2.21309	0.140453	0.439205
Cdk9	20.9493	22.1311	23.1942	21.0741	23.8481	20.8276	25.6716	24.9639	24.5435	18.0829	-0.0344297	4.40825	0.0786148	0.796894	1
Cdlc2	0	0	0	0	0	0	0	0	0	0	0	-1.29815	0	1	1
cdm	185.052	185.901	190.982	171.754	199.411	174.952	163.82	180.174	189.373	189.218	0.0558207	7.26105	1.0215	0.31496	0.656408
CdsA	1278.15	1176.67	865.096	964.982	1129.23	670.648	861.739	687.864	722.613	700.572	0.571295	9.74586	31.0208	2.7893e-07	5.1271e-05
CecA1	0.748188	25.6254	0	39.1978	3.80555	0	0	0	2.06682	0	5.12348	2.34376	12.281	0.000724843	0.0151178
CecA2	0	2.7955	0	8.85111	2.02963	0.260345	0	0	0	0	5.30152	1.58751	7.66453	0.00687856	0.0656721
CecB	0	14.9093	0	20.2311	0.253703	0	0	0	1.29176	0	4.76722	0.624845	13.6633	0.000426476	0.0105841
CecC	0.249396	46.8247	0	88.9326	2.28333	0.781035	0	0	3.87529	0	4.96768	2.00865	17.9195	5.9062e-05	0.00263448
Ced-12	24.1914	30.0516	32.3239	26.1319	28.1611	29.6793	26.9769	37.7172	28.6772	38.4028	-0.198327	4.80813	3.84052	0.0532229	0.240221
ced-6	116.218	140.241	139.906	135.296	120.509	142.148	144.675	147.613	147.003	129.376	-0.123421	7.42472	2.5064	0.117006	0.388942
Cen	62.8478	80.1377	87.842	80.7137	78.648	78.3638	91.8085	94.4287	78.7976	89.6687	-0.150592	6.2983	1.965	0.16453	0.485332
CenB1A	46.637	56.8419	63.6608	55.0033	58.0981	65.8673	47.4272	62.6811	64.5882	67.8574	-0.137826	5.98421	2.71774	0.102838	0.358667
CenG1A	105.744	118.809	121.4	115.486	117.972	107.522	85.4994	112.338	119.101	115.022	0.10345	6.85928	1.85623	0.176571	0.506529
Cenp-C	4.98792	6.7558	5.67519	4.6363	8.37221	9.37242	6.30912	4.88424	7.75058	7.45686	-0.238319	2.96348	0.736058	0.393279	0.751407
Cep135	9.22765	9.78426	12.3374	10.9585	7.10369	9.63276	13.4885	13.5673	8.78399	9.13465	-0.139068	3.4614	0.488625	0.486402	0.862737
Cep89	0	0	0.246747	0	0	0	0	0	0	0	1.52965	-1.2483	1.75013	0.236514	0.559103
Cep97	37.6588	41.4666	52.0637	45.3093	48.2036	55.1931	45.0341	55.8974	52.1873	49.4017	-0.19613	5.50172	3.36619	0.0699585	0.286636
cer	26.436	18.4037	29.8564	25.9211	19.5352	20.0466	38.0723	23.3358	15.7595	24.794	-0.0288499	4.551	0.0375935	0.846713	1
Cerk	88.7849	83.6321	85.3746	84.2963	85.7517	82.269	76.7972	90.0871	79.0559	82.3983	0.0596452	6.436	0.89673	0.346278	0.695925
cert	43.8937	44.0292	48.3625	44.677	47.4425	41.9155	45.0341	43.4155	47.0202	46.0461	0.0308296	5.59057	0.164645	0.69299	1
cerv	12.9686	12.3468	14.5581	13.2767	12.6852	15.6207	17.622	16.0095	12.4009	16.4051	-0.248382	3.82754	4.08303	0.0463848	0.220232
Cf2	112.228	98.5414	88.829	87.4574	102.496	85.9138	63.0912	84.9316	82.1562	79.0427	0.30979	6.55094	8.81217	0.00386312	0.0444724
Cfp1	9.47704	12.3468	17.7658	14.5411	13.7	20.3069	17.4045	19.537	16.0179	22.7434	-0.502625	4.17625	7.7037	0.00674293	0.0648959
cg	212.984	232.958	234.903	218.538	239.496	225.459	161.209	243.127	232.259	242.534	0.0443129	7.79686	0.561707	0.455591	0.826717
CG10000	0	0.232958	0	0	0	0	0	0	0	0	1.52435	-1.03165	1.71979	0.236514	0.559103
CG10005	0	0.232958	0.493495	0	0.253703	0.260345	0	0	0.258353	0	0.847262	-0.757912	0.692965	0.407432	0.768105
CG10011	130.933	166.332	162.113	160.584	172.772	146.835	82.2361	158.195	188.081	181.947	0.0663894	7.31117	0.341254	0.560615	0.932484
CG10013	0	0	0	0	0	0	0	0	0	0	0	-1.23566	0	1	1
CG10014	0	0.232958	0.493495	0	0	0	0	0	0	0	2.73201	2.43845	5.01791	0.0403344	0.204317
CG10019	24.9396	20.5003	17.2723	18.9667	24.1018	20.8276	10.0076	16.5522	13.951	19.2014	0.391768	4.36495	5.73999	0.018722	0.125819
CG10026	10.4746	13.9775	15.0516	14.3304	12.6852	17.4431	21.7556	16.0095	16.0179	10.8124	-0.296138	3.93782	1.83829	0.178654	0.509956
CG10029	0	0	0	0	0	0	0	0	0	0	0	-1.29851	0	1	1
CG10031	18.4553	23.5288	14.3113	20.2311	14.9685	15.6207	34.5914	17.9089	12.6593	7.27043	0.0601062	4.59264	0.0369142	0.848087	1
CG10032	0	0	0	0	0	0	0	0	0	0	0	-1.29805	0	1	1
CG10035	0.748188	0.698875	0.493495	0.421482	0.507407	0	0.870223	0.81404	0.775058	0.559264	-0.082569	0.103006	0.0157231	0.900502	1
CG10038	13.218	9.78426	11.3504	10.9585	10.9092	9.11207	15.2289	13.8387	11.1092	9.88033	-0.0738871	3.57252	0.212343	0.646085	1
CG10041	0.748188	0.232958	0	0	0.253703	0	0.217556	0.271347	0.258353	0.186421	0.322106	-0.747885	0.114688	0.735722	1
CG10050	6.48429	7.45467	6.90893	4.00407	5.07407	4.94655	5.00378	6.51232	6.45882	5.59264	0.0694185	2.61481	0.106605	0.744826	1
CG10051	0.498792	0.465917	0.493495	0.421482	1.26852	1.04138	0.435112	0.271347	0.516706	0.559264	0.139572	-0.251973	0.0399653	0.842014	1
CG10053	1.99517	3.49438	5.18169	3.16111	4.05925	3.64483	4.56867	3.79886	4.65035	3.91485	-0.203851	2.10231	0.597832	0.441498	0.808617
CG10055	11.2228	18.8696	19.2463	22.76	21.5648	21.6086	23.9311	17.3662	20.9266	23.8619	-0.202952	4.47945	2.40096	0.124884	0.406882
CG10062	21.448	21.1992	16.0386	20.6526	17.5055	13.5379	11.5305	12.2106	11.1092	11.931	0.684251	3.60266	17.8114	5.95882e-05	0.00265088
CG10063	0	0.232958	0	0	0	0	0	0	0	0	1.52434	-1.08449	1.52651	0.236514	0.559103
CG10064	0	0	0.246747	0	0	0	0	0	0	0	1.52943	-0.831863	1.43389	0.236514	0.559103
CG10068	25.189	21.8981	17.2723	21.4956	23.5944	20.5672	25.2365	20.8937	18.8598	24.0484	-0.00685103	4.5937	0.00326098	0.954592	1
CG10073	0	0.232958	0.493495	0.210741	0.253703	0	0	0	0.258353	0.186421	1.15347	-0.417945	0.962713	0.32922	0.675278
CG10075	25.6878	23.0629	23.1942	18.5452	19.2815	22.1293	32.1983	19.537	26.352	23.3027	-0.174412	4.46526	2.31459	0.131784	0.420838
CG10077	3143.39	3048.26	2286.36	2624.35	3003.59	2319.67	1613.18	2468.71	2194.71	2557.52	0.33877	11.2953	13.4493	0.00042095	0.0104936
CG10081	0	0	0	0	0	0	0	0	0	0	0	-1.29808	0	1	1
CG10082	365.116	398.126	403.432	374.276	404.403	390.257	274.773	431.441	401.739	431.938	0.011426	8.60236	0.0308236	0.861042	1
CG10086	0	0	0	0	0	0	0	0	0	0	0	-1.05947	0	1	1
CG10089	86.291	80.6036	69.0893	68.28	71.798	49.9862	55.6943	74.349	60.9713	70.4673	0.270911	6.12206	9.05977	0.00341675	0.0411509
CG10092	14.7144	14.4434	15.0516	15.3841	12.4315	13.7983	11.9656	13.296	15.7595	13.6088	0.0771125	3.99127	0.465278	0.496976	0.872839
CG10096	0	0	0	0	0	0	0	0	0	0	0	-1.30545	0	1	1
CG10097	0	0	0	0	0	0	0	0	0	0	0	-1.30545	0	1	1
CG10098	42.8961	46.8247	50.0897	50.5778	44.9055	43.9983	57.4347	47.757	45.9868	49.9609	-0.0601509	5.54119	0.534425	0.466713	0.839521
CG10103	71.5766	79.2059	71.0632	73.97	72.8129	70.2931	91.3734	85.7456	75.1807	81.839	-0.134239	6.15732	2.95113	0.0893675	0.338613
CG10104	0	0	0	0	0	0	0.217556	0	0	0	-1.5065	-1.28358	1.76105	0.241564	0.559103
CG10116	1.24698	0.465917	0.740242	0	0.76111	0.52069	0.870223	0.542694	0.516706	1.49137	-0.367388	0.183912	0.373362	0.542767	0.922633
CG10126	35.6636	40.5348	33.3109	46.7845	30.9518	37.75	49.3852	32.0189	43.1449	36.1658	-0.0825548	5.26568	0.548685	0.460846	0.833089
CG10131	5.48671	7.45467	13.0776	11.5907	8.11851	11.1948	22.4082	15.1954	17.8263	15.8458	-0.848901	3.58612	15.7328	0.000149214	0.0051286
CG10132	116.967	133.252	131.516	119.069	134.716	151.26	82.6712	151.14	135.118	168.898	-0.116776	6.94382	1.38129	0.243082	0.561188
CG10133	5.9855	6.28988	6.66218	6.32222	5.58147	4.68621	7.17934	6.78367	8.52564	8.20254	-0.202725	2.89973	1.35498	0.247585	0.567543
CG10137	83.2982	85.2628	87.1018	80.2922	92.0943	101.795	73.7514	96.0568	88.3566	97.1256	-0.0945084	6.34091	1.80807	0.182228	0.516545
CG10139	18.9541	18.1708	14.8048	15.8056	14.4611	19.5259	26.5418	22.2504	18.0847	19.7607	-0.369816	4.05346	7.33698	0.00813049	0.073712
CG10140	0	0.232958	0	0	0	0	0	0	0	0	1.52437	-0.91156	1.73519	0.236514	0.559103
CG10144	23.6926	27.2561	24.1812	24.8674	24.1018	25.5138	18.7098	21.9791	22.735	24.794	0.126313	4.55439	1.38428	0.242577	0.560573
CG10147	10.2252	9.31834	7.64917	12.6444	10.1481	8.33104	10.8778	13.0246	13.176	11.5581	-0.183552	3.54101	1.0913	0.299071	0.637482
CG10151	23.942	20.5003	24.6747	26.5533	26.3851	31.2414	25.2365	30.6622	25.3186	31.5052	-0.238034	4.60787	3.5617	0.0624548	0.26583
CG10154	0	0	0	0	0	0	0	0	0	0	0	-1.30545	0	1	1
CG10157	16.7095	13.2786	16.0386	14.7519	9.89443	18.4845	24.5838	20.6224	13.176	10.0668	-0.292048	3.75936	1.26495	0.263803	0.589795
CG10158	14.2156	11.6479	15.5451	15.5948	16.237	18.4845	26.3243	17.0948	14.2094	19.3878	-0.388452	4.26453	9.17489	0.00322779	0.0394097
CG10163	0	0	0	0	0	0	0	0	0	0	0	-1.22641	0	1	1
CG10164	0	0.232958	0	0	0	0	0	0	0	0	1.5243	-1.24807	1.73132	0.236514	0.559103
CG10165	7.23248	7.68763	7.64917	9.27259	5.83518	7.28966	11.5305	5.42694	7.23388	3.91485	0.0975952	3.10834	0.232264	0.631058	0.995633
CG10166	20.4505	18.6367	14.0646	15.5948	15.7296	18.2241	26.5418	19.8083	19.3765	18.6421	-0.282208	4.18526	4.97618	0.0282656	0.162759
CG10168	0	0	0	0	0	0	0	0	0	0	0	-1.28375	0	1	1
CG10170	0	0	0	0	0	0	0	0	0	0	0	-1.00613	0	1	1
CG10171	9.72644	10.7161	8.63616	12.6444	11.6704	8.59138	13.706	10.0398	13.176	8.94823	-0.024911	3.79855	0.0253971	0.903781	1
CG10175	81.3031	56.376	65.1413	68.28	65.9629	42.1759	49.6027	42.6015	41.5948	48.0967	0.586176	6.0865	13.213	0.000469512	0.0113394
CG10176	32.4215	29.5857	23.6877	17.913	27.9074	15.6207	18.2747	12.482	19.3765	12.6767	0.743934	4.36257	14.4001	0.000272274	0.00776879
CG10177	0.249396	0.465917	0.493495	1.0537	0.253703	0.52069	0.870223	0.542694	0.775058	0.372843	-0.237907	-0.061879	0.152187	0.709893	1
CG10178	15.9613	28.8869	20.48	28.8715	18.5203	23.9517	33.9387	19.2656	19.6348	16.4051	-0.00144592	4.86079	5.8865e-05	0.993896	1
CG10182	0	0	0	0	0	0	0.870223	0	0.258353	0	-3.34968	-0.962565	5.3807	0.0234086	0.144406
CG10183	0.249396	0	0	0	0	0	0.217556	0	0	0	0.0238388	-1.09625	0.000253074	0.991591	1
CG10184	11.4722	11.415	11.8439	16.0163	10.6555	7.02931	13.4885	10.5825	6.97552	10.2532	0.339982	3.53662	3.28062	0.0735467	0.296366
CG10185	73.5718	3.02846	15.2983	1.68593	0.76111	3.64483	2.61067	4.34155	1.80847	3.54201	2.54068	4.85916	7.08338	0.00926198	0.0803554
CG10186	1405.35	1517.72	1638.4	1442.52	1546.58	1811.74	1141.08	1799.57	1684.98	1937.66	-0.1495	10.4472	3.62139	0.0603418	0.259938
CG10188	108.238	114.383	117.452	109.796	122.792	119.759	81.5834	116.95	125.043	113.344	0.0416806	6.77495	0.267181	0.606538	0.971891
CG10189	26.436	20.5003	28.8694	27.8178	22.5796	19.2655	25.454	15.4668	24.0268	20.8792	0.260917	4.01575	3.78488	0.0549399	0.24467
CG10194	15.7119	15.3753	10.6101	14.3304	14.2074	15.6207	18.2747	17.3662	13.4343	13.2359	-0.147132	3.92168	1.10832	0.295356	0.63355
CG10195	19.2035	14.4434	11.5971	12.223	10.9092	14.8397	15.0114	17.6375	10.8508	15.473	-0.111989	3.95767	0.667282	0.416228	0.779362
CG10202	0	0	0	0.210741	0	0	0	0	0	0.186421	0.0228003	-0.661446	0.000262193	0.991591	1
CG10205	91.7777	61.734	84.6343	71.4411	84.9906	84.6121	88.1101	71.6356	82.1562	84.0761	-0.0591808	6.25391	0.242484	0.623655	0.988242
CG10208	7.98067	8.61946	5.67519	5.90074	7.10369	8.33104	9.79001	6.51232	5.68376	6.15191	-0.0506902	2.85512	0.0734235	0.787056	1
CG10209	11.7216	13.5116	16.2853	14.3304	14.7148	20.8276	15.8816	19.537	19.3765	18.4557	-0.411556	4.06542	6.2661	0.0141709	0.106247
CG10211	90.5307	98.3085	87.1018	94.8333	74.3351	93.4638	56.7821	87.1023	151.911	88.7366	-0.0998779	6.27049	0.43641	0.510602	0.888838
CG10214	11.2228	12.5798	9.12965	12.223	11.1629	16.4017	18.7098	12.482	12.1426	11.931	-0.345395	3.75384	6.98076	0.0097655	0.0831709
CG10217	67.8357	56.8419	50.3365	55.8463	61.1425	53.8914	50.4729	54.5407	48.5703	45.3004	0.209232	5.68205	6.8936	0.0102157	0.0858679
CG10219	264.858	181.009	190.982	184.609	194.337	165.319	232.35	157.381	164.571	170.948	0.18876	7.37345	2.25638	0.136679	0.431282
CG10222	5.73611	4.89213	6.41543	6.53296	5.58147	5.46724	7.83201	6.78367	9.55905	6.52475	-0.307053	2.64265	1.91286	0.170178	0.495572
CG10226	193.282	170.06	187.775	175.126	169.474	164.278	154.465	188.315	168.704	176.727	0.0714292	7.25651	0.639841	0.425943	0.789533
CG10232	0.997584	0.465917	1.23374	1.0537	0.253703	1.04138	0.217556	0.542694	1.29176	0.559264	0.168524	0.473712	0.0738638	0.786435	1
CG10237	139.163	114.616	156.438	131.924	110.361	167.662	168.606	150.869	131.76	139.443	-0.216751	7.20554	3.64133	0.0596531	0.258115
CG1024	11.4722	15.3753	14.8048	12.6444	13.1926	15.6207	14.7938	11.9393	18.0847	14.5409	-0.151365	3.9177	1.32536	0.25278	0.573834
CG10249	126.444	121.837	120.413	130.449	119.494	121.841	101.599	119.664	120.134	115.022	0.0981026	6.99613	2.93716	0.0901167	0.340882
CG10252	0	0.232958	0.246747	0	0.253703	0	0	0.271347	0	0	1.21215	-0.981903	1.04675	0.309721	0.651742
CG10253	46.3876	51.7168	44.4145	47.6274	52.7703	49.7259	40.9005	43.9582	48.312	54.4351	0.0323244	5.55793	0.146005	0.703312	1
CG10254	87.2886	97.1437	89.816	87.0359	90.0647	87.2155	68.095	88.7304	92.4903	88.5502	0.0871839	6.53951	0.58689	0.445694	0.813522
CG10257	22.9444	25.3925	18.0126	21.4956	21.0574	20.3069	17.4045	18.7229	13.4343	18.0829	0.308212	4.37351	5.58643	0.0203231	0.132326
CG10262	7.23248	9.31834	9.86989	8.85111	9.89443	9.11207	11.9656	13.8387	6.71717	10.9989	-0.22245	3.19087	1.61655	0.206956	0.559103
CG10264	0	0	0	0	0.253703	0	0	0	0	0	1.53214	-1.24029	1.7211	0.236514	0.559103
CG10265	8.47946	6.52284	9.62315	8.85111	7.3574	10.1535	14.5762	14.9241	8.52564	9.13465	-0.484549	3.22879	7.65055	0.00692765	0.0660278
CG10268	4.48913	5.12509	8.38941	6.95445	7.3574	10.9345	13.0533	9.76849	6.45882	12.3038	-0.707656	3.15318	15.5968	0.000158577	0.00529942
CG10274	10.724	12.3468	15.7918	13.2767	10.9092	13.7983	12.1831	13.8387	12.4009	15.1001	-0.0951054	3.91405	0.398199	0.529672	0.909386
CG10280	0	0	0	0	0.253703	0.260345	0	0	0	0	0.00899778	-1.24843	8.56086e-05	0.992665	1
CG10283	48.3828	48.6883	54.2844	47.8382	47.4425	59.619	51.9958	60.5103	57.6127	58.5363	-0.224538	5.66142	6.82485	0.010586	0.0881833
CG10286	9.22765	9.78426	14.0646	12.8552	7.8648	13.2776	11.5305	11.3966	13.951	9.32107	-0.134109	3.60222	0.593376	0.443199	0.810518
CG10289	148.889	166.798	144.347	148.151	169.22	109.866	93.7666	122.649	134.86	122.665	0.413482	7.25068	18.2322	4.96225e-05	0.00233156
CG10298	0	0	0	0	0	0	0	0	0	0	0	-1.27746	0	1	1
CG10300	0	0.232958	0	0	0	0	0	0	0	0	1.52435	-1.02446	1.39681	0.241987	0.559704
CG10301	0	0	0	0	0	0	0.217556	0.271347	0	0	-2.24221	-0.950722	2.88553	0.097688	0.346854
CG10306	83.5476	83.1662	118.439	93.3582	84.7369	121.321	150.331	115.865	114.45	115.768	-0.415603	6.796	16.8582	9.05092e-05	0.00360464
CG10307	45.6395	41.4666	44.908	33.9293	39.324	35.6672	44.8165	42.8728	33.3275	40.6399	0.054153	5.10287	0.134487	0.714713	1
CG10311	123.95	81.5355	78.7124	68.0693	81.1851	72.1155	102.034	72.9923	64.0715	71.213	0.178204	6.19721	2.66583	0.106132	0.365942
CG10317	0.748188	0.465917	0	0.421482	0	0.52069	0	0.271347	0	0.186421	0.73118	-0.886531	0.596835	0.442669	0.8103
CG10320	144.899	108.792	152.737	114.854	94.8851	156.988	199.716	147.884	139.51	150.815	-0.368234	6.99346	7.72299	0.00667717	0.0645229
CG10321	41.6491	48.9213	51.5702	47.6274	47.6962	57.7966	44.1638	56.7115	70.5303	63.1969	-0.299314	5.70899	8.21033	0.00521929	0.054667
CG10324	3.74094	4.42621	7.15567	4.6363	4.82036	7.02931	7.17934	9.22579	9.55905	6.89759	-0.678957	2.84345	6.25885	0.0142249	0.106557
CG10326	97.7632	87.1265	89.5693	83.6641	90.0647	74.4586	94.4192	90.0871	72.3388	82.5847	0.113857	6.37914	2.61658	0.109365	0.372579
CG10332	0	0	0	0	0	0	0	0	0	0	0	-1.30545	0	1	1
CG10333	21.448	23.9947	34.5446	30.5574	26.6389	36.7086	26.1067	40.9734	36.4277	37.6571	-0.371573	5.00522	6.90858	0.0101368	0.0854197
CG10336	1.24698	0.698875	1.23374	0.842963	2.02963	0.52069	1.74045	2.17077	3.10023	1.67779	-0.605455	1.26183	1.50367	0.22341	0.559103
CG10337	3.24215	2.56254	1.23374	2.73963	2.79074	2.86379	1.958	1.89943	2.84188	1.67779	0.175068	1.62132	0.241887	0.624083	0.988544
CG10338	18.9541	20.0344	15.5451	16.8593	15.9833	14.319	19.7976	17.3662	16.7929	13.6088	0.0955707	4.33532	0.611592	0.436308	0.802433
CG10339	10.9734	9.78426	9.86989	9.27259	4.82036	10.6741	7.83201	10.5825	7.23388	10.8124	-0.074451	3.15341	0.149455	0.699999	1
CG10340	41.1503	37.7393	43.921	36.0367	31.9666	40.0931	54.389	49.6565	43.92	54.0622	-0.346142	5.26226	8.78363	0.00391831	0.044984
CG10341	9.97584	10.4831	16.5321	16.8593	9.13332	19.7862	16.3167	19.2656	10.8508	13.2359	-0.324668	3.77181	4.08248	0.0463992	0.220238
CG10343	7.98067	8.15355	13.0776	10.9585	9.13332	11.9759	17.622	14.9241	10.5925	11.1853	-0.425272	3.54069	5.96417	0.0166188	0.117243
CG10344	5.73611	3.49438	2.96097	4.00407	5.58147	3.12414	5.22134	3.52751	2.32517	3.54201	0.279172	2.11379	0.953851	0.331443	0.677674
CG10345	79.5573	95.28	79.2059	69.3337	70.0221	81.2276	88.1101	89.8158	53.479	63.7561	0.0646207	6.47468	0.125547	0.72395	1
CG10347	23.942	25.6254	17.2723	23.603	21.3111	21.6086	26.3243	18.4516	21.4433	18.4557	0.0730894	4.38572	0.361521	0.549223	0.924495
CG10348	4.23973	5.35805	3.20772	5.26852	4.82036	2.08276	3.69845	0.81404	2.84188	3.91485	0.73554	2.47781	8.96124	0.00358761	0.0425
CG10352	23.942	27.4891	19.493	21.0741	21.5648	17.4431	27.8471	19.537	14.2094	20.8792	0.178644	4.03851	1.43523	0.234161	0.559103
CG10353	156.87	141.406	147.308	147.94	164.653	149.698	104.209	146.799	151.395	154.543	0.101712	7.54977	2.13636	0.147438	0.452431
CG10357	0	0.232958	0	0.210741	0	0	0	0	0	0	2.24599	1.26081	0.391192	0.533386	0.913019
CG10359	14.7144	11.182	12.8309	12.223	11.9241	8.59138	12.8358	7.05502	10.5925	8.38896	0.39979	3.46047	4.61757	0.0344181	0.185592
CG10361	2.49396	3.49438	4.1947	4.42556	3.80555	5.46724	8.91979	8.41175	7.49223	7.08401	-1.01257	2.997	12.6032	0.000623356	0.0135414
CG10362	85.5428	78.507	99.1924	83.2426	92.0943	90.3397	60.9156	94.7	91.1985	92.6514	0.0296591	6.47814	0.145191	0.704101	1
CG10365	52.8719	57.5407	49.3495	49.1026	58.0981	59.8793	48.2974	57.2542	56.5793	55.9264	-0.0575921	5.61501	0.323986	0.570686	0.937155
CG10366	14.2156	17.006	21.2203	21.0741	17.7592	21.3483	21.1029	21.1651	22.4767	20.5064	-0.220781	4.43305	2.88378	0.0930429	0.34456
CG10375	17.7071	16.3071	25.415	20.6526	20.8037	17.9638	31.328	24.6926	22.9934	23.3027	-0.256721	4.40598	3.94514	0.0501483	0.231338
CG10376	29.6781	33.3131	29.3629	28.2393	41.0999	34.8862	37.6372	31.2049	28.1605	33.9287	-0.0397074	5.08569	0.165785	0.684883	1
CG10383	47.1358	50.0861	38.7393	46.1522	40.0851	38.7914	33.5036	31.2049	34.1026	34.6744	0.367564	5.54183	3.31577	0.0720488	0.291877
CG10384	106.243	102.968	107.829	109.585	108.331	114.031	77.0148	118.307	105.15	123.597	-0.00819806	6.76053	0.0092976	0.923405	1
CG10395	17.9565	19.5685	11.5971	15.5948	14.9685	12.2362	12.8358	13.0246	18.8598	10.9989	0.236578	4.07598	1.95857	0.165215	0.486541
CG10396	0.997584	0	0.246747	0	0.76111	0.260345	0	0.542694	0	0.186421	0.943617	-0.744841	1.15747	0.284959	0.619769
CG10399	4.73852	3.26142	5.42844	4.42556	2.28333	3.90517	7.61445	2.98482	5.68376	4.66054	-0.310204	2.25751	1.45706	0.230663	0.559103
CG10405	0	0	0	0.210741	0	0.260345	0	0	0	0	-0.00760825	-0.89003	1.55729e-07	0.999686	1
CG10407	15.2132	7.68763	9.86989	11.1693	6.84999	6.24828	9.13734	8.6831	7.23388	6.52475	0.425844	2.8238	3.18812	0.077653	0.307069
CG1041	30.6757	28.4209	33.8044	32.0326	26.3851	28.6379	31.7631	25.7779	24.5435	26.6583	0.138494	4.94796	1.52813	0.219714	0.559103
CG10413	104.746	104.831	69.0893	96.0978	101.735	77.3224	76.5796	68.9221	75.439	73.0772	0.359601	6.50155	10.3443	0.00182293	0.0272251
CG10417	120.209	115.78	91.0498	107.899	120.002	82.269	112.911	100.398	99.9825	94.8885	0.177638	6.71051	3.0754	0.0829997	0.322194
CG10418	3.99033	3.26142	5.67519	6.53296	6.08888	7.02931	7.3969	7.59771	6.97552	7.08401	-0.493191	2.52509	5.02415	0.0275358	0.159983
CG10420	11.4722	17.006	18.7528	15.5948	14.7148	16.1414	23.7136	19.537	19.6348	21.9977	-0.384545	4.08094	7.42855	0.0077582	0.0713814
CG10424	14.465	12.8127	17.5191	16.8593	13.1926	14.5793	20.8854	17.3662	16.5346	14.9137	-0.169964	3.99328	1.56927	0.213663	0.559103
CG10425	12.7192	11.6479	13.5711	15.1733	14.4611	14.5793	17.8396	13.0246	13.6927	15.1001	-0.138598	3.99182	1.22186	0.272037	0.601422
CG10426	40.6515	38.4382	34.2979	31.4004	36.0259	32.8035	32.1983	34.461	36.6861	38.9621	0.0439823	5.04272	0.239352	0.657052	1
CG10428	31.1745	25.1595	28.6227	30.9789	27.4	19.5259	30.2403	25.5066	26.352	27.7768	0.14409	4.80932	2.17852	0.143552	0.445656
CG10431	2.49396	1.86367	4.1947	3.37185	4.31296	2.3431	3.26334	5.42694	3.10023	2.79632	-0.051497	1.99759	0.0497032	0.867676	1
CG10433	318.479	360.62	324.719	359.313	300.892	255.138	355.051	278.402	210.041	260.804	0.291412	8.17585	6.01071	0.0162142	0.11546
CG10435	25.9372	29.5857	36.2719	28.2393	28.6685	35.6672	33.5036	36.0891	30.4856	34.6744	-0.196807	4.95877	3.05578	0.0839711	0.324835
CG10440	43.1455	37.7393	35.5316	36.8796	42.1148	34.1052	38.5074	39.3453	33.0692	42.6905	0.0547504	5.22692	0.331911	0.58331	0.948955
CG10444	87.2886	79.4388	67.362	78.6063	68.7536	56.7552	68.9652	67.0227	47.2786	53.1301	0.380219	6.05944	9.25584	0.00310144	0.0383996
CG10445	1.49638	1.63071	0.493495	1.26444	0.507407	1.04138	1.08778	0.81404	2.32517	0.745686	-0.125229	0.7218	0.064601	0.812582	1
CG10459	0.498792	1.16479	0.493495	1.0537	1.01481	0.781035	1.958	1.35673	1.29176	0	-0.305237	0.120563	0.300191	0.585163	0.950786
CG10462	47.6346	36.1086	34.7914	36.8796	37.0407	28.6379	37.6372	33.9184	31.519	28.1496	0.267451	5.08498	5.69198	0.0192078	0.127277
CG10463	3.74094	4.42621	5.67519	5.05778	4.31296	6.50862	5.00378	5.42694	5.68376	3.54201	-0.155587	2.57287	0.513626	0.510831	0.888959
CG10465	66.8381	55.2112	52.5572	57.5322	61.1425	41.1345	62.4385	37.9886	47.5369	46.9782	0.309351	5.92573	6.85088	0.0104441	0.0872624
CG10466	3.49154	5.12509	4.44145	4.42556	3.55185	5.72759	6.96179	5.69828	6.45882	4.84696	-0.488378	2.41575	6.09963	0.0154912	0.112125
CG10467	10.9734	10.7161	10.6101	11.38	12.9389	10.9345	13.2709	11.1252	11.8842	12.6767	-0.0852601	3.4847	0.325401	0.569847	0.936431
CG10469	4.48913	2.32958	5.92194	5.05778	5.58147	3.90517	5.87401	4.0702	4.65035	3.16916	0.109149	2.11166	0.223247	0.637757	1
CG10470	24.6902	18.4037	17.0256	17.913	12.6852	22.1293	27.412	24.1499	18.6014	20.1335	-0.308935	4.40374	5.48076	0.0215084	0.137003
CG10472	4.98792	5.35805	4.44145	3.79333	4.31296	3.64483	3.26334	4.6129	3.87529	5.40622	0.127599	2.56379	0.158281	0.691717	1
CG10474	0	0	0	0	0	0	0	0	0	0	0	-1.29821	0	1	1
CG10476	0	0	0	0	0	0	0	0	0	0	0	-1.30545	0	1	1
CG10477	0.249396	0	0	0	0	0	0	0	0	0	1.52953	-0.229619	1.03122	0.313746	0.654776
CG10479	19.2035	20.7333	31.8304	23.603	25.8777	32.0224	35.0265	31.7476	32.5524	29.0817	-0.403754	4.79414	9.58845	0.00263372	0.0344712
CG10481	0	0	0	0	0	0	0	0	0	0	0	-1.29879	0	1	1
CG10483	55.6153	59.6374	61.9336	58.5859	55.561	51.5483	47.4272	50.7419	51.4122	55.74	0.181118	5.55017	5.27858	0.0239842	0.146739
CG10486	0	0.232958	0	0	0.253703	0	0	0.271347	0	0	0.728829	-1.05922	0.350683	0.555504	0.928355
CG10492	52.1237	56.6089	60.6998	61.9578	62.1573	54.4121	36.5494	60.5103	66.3967	61.3326	0.0738852	5.85315	0.828026	0.365353	0.717917
CG10494	3.24215	4.89213	6.41543	6.32222	5.32777	11.4552	7.17934	9.76849	8.00894	5.59264	-0.659038	3.01404	10.4658	0.001719	0.0262591
CG10495	4.48913	5.12509	4.44145	4.00407	4.56666	7.02931	9.57246	5.69828	4.9087	5.77906	-0.547327	2.47323	5.11304	0.0262355	0.155013
CG10505	0.498792	0.465917	1.48048	0.632222	1.01481	1.82241	1.74045	2.71347	1.55012	1.67779	-1.19262	1.53812	9.36154	0.00294412	0.0372514
CG10508	106.741	117.644	120.413	106.213	113.152	126.267	123.572	128.076	112.383	134.037	-0.146728	6.89505	4.86741	0.0299978	0.169138
CG10510	0	0	0	0	0	0	0.217556	0	0	0	-1.50653	-1.23652	1.79256	0.241564	0.559103
CG10512	51.3756	44.4951	38.2458	40.673	43.637	35.1466	48.9501	31.4762	27.6437	34.8608	0.290199	5.52364	3.43781	0.0671016	0.278652
CG10513	59.855	51.4838	52.0637	57.743	38.5629	25.2535	26.7594	26.8633	21.7016	30.2003	0.986613	4.63784	41.4396	6.38064e-09	2.17814e-06
CG10514	18.7047	17.2389	13.0776	15.8056	12.6852	10.4138	10.0076	18.1802	5.16706	9.32107	0.5531	2.9165	8.74865	0.0039871	0.0453132
CG10516	10.9734	11.415	16.0386	12.8552	10.1481	13.7983	20.8854	15.4668	11.6259	11.1853	-0.246625	3.85536	1.23224	0.270024	0.598317
CG10527	315.735	253.692	261.552	278.178	283.64	276.747	292.83	232.816	246.727	236.196	0.115739	7.74114	1.35302	0.247926	0.567934
CG10543	65.8405	86.1946	97.9587	91.883	94.1239	90.0793	48.2974	93.072	102.824	94.8885	0.0244603	6.5047	0.0566936	0.812359	1
CG10550	158.865	136.514	184.814	157.002	147.402	179.378	203.197	160.095	152.945	159.95	-0.125253	7.29341	2.2976	0.133192	0.42412
CG10553	13.4674	10.4831	16.5321	15.1733	11.4167	5.98793	6.74423	8.6831	6.20047	3.91485	1.10634	4.06222	18.5252	4.37087e-05	0.00213776
CG10555	39.1552	47.5235	37.2588	36.2474	37.0407	41.6552	26.9769	41.5161	43.6616	44.7411	-0.008625	5.34073	0.00728758	0.932165	1
CG10559	3.49154	3.49438	3.70121	2.73963	3.29814	2.08276	2.39311	2.17077	2.58353	1.86421	0.588878	1.32977	4.27964	0.0415337	0.208253
CG10560	33.1697	26.5573	31.3369	26.7641	19.0278	24.4724	24.8014	16.5522	13.951	17.71	0.486958	4.82432	7.29911	0.00828981	0.0747513
CG10561	58.608	54.2793	59.2194	54.1604	58.6055	61.4414	55.4767	59.6963	60.1962	67.4845	-0.096316	5.74887	1.18738	0.278862	0.610541
CG10562	13.218	13.9775	11.3504	13.4874	12.1778	8.07069	11.5305	9.22579	13.176	7.8297	0.370084	3.6514	5.59545	0.0202252	0.131996
CG10565	49.3804	53.3475	77.4787	63.2222	57.8444	82.5293	81.3659	85.7456	86.8065	83.8896	-0.479925	6.22722	10.7097	0.00152846	0.0244422
CG10566	33.4191	31.2164	46.1417	36.0367	39.324	41.9155	56.7821	41.2447	41.8531	52.198	-0.334223	5.18292	6.72872	0.0111276	0.0914199
CG10570	0	0	0	0	0	0	0	0	0	0	0	-1.30545	0	1	1
CG10576	44.3925	57.7737	68.8425	70.8089	60.1277	82.0086	77.6674	72.9923	75.439	70.8401	-0.326015	6.33279	4.89372	0.0295688	0.167547
CG10581	3.99033	5.12509	7.40242	5.69	5.07407	4.16552	9.3549	7.32636	6.20047	8.20254	-0.377787	2.43318	3.35585	0.0703819	0.287491
CG10584	13.7168	15.8412	8.63616	10.1156	12.9389	12.2362	16.9694	13.0246	12.9176	13.7952	-0.175532	3.79373	1.72702	0.192239	0.533707
CG10585	33.4191	31.9153	37.2588	31.6111	29.1759	31.2414	37.6372	34.1897	33.5859	35.4201	-0.0763997	4.94229	0.67023	0.415204	0.778164
CG10587	0	0	0	0	0	0	0	0	0	0	0	-1.30545	0	1	1
CG10588	0	0	0	0.210741	0	0	0	0	0	0	1.51452	-1.20137	1.86602	0.236514	0.559103
CG10589	0	0	0	0	0	0	0	0	0	0	0	-1.25546	0	1	1
CG10590	39.654	43.5632	38.7393	42.9911	45.1592	34.3655	34.8089	32.833	31.2607	35.9793	0.310453	5.34357	12.7199	0.000590348	0.0130102
CG10591	0	0	0	0	0	0	0	0	0	0	0	-1.1336	0	1	1
CG10592	0	0	0	0	0	0	0	0.271347	0.258353	0	-2.25386	-0.567114	2.57623	0.115771	0.386758
CG10597	0	0	0	0	0	0	0	0	0	0	0	-1.22699	0	1	1
CG10598	0	0	0	0	0	0	0	0	0	0	0	-1.27041	0	1	1
CG10600	64.0948	77.3422	86.6083	79.2385	77.6332	78.3638	51.3432	72.4496	88.615	82.5847	0.0448567	6.31957	0.252962	0.616265	0.980993
CG10602	71.3272	64.9954	60.9466	66.8048	70.5295	58.5776	70.9232	56.9828	68.4635	65.6203	0.0604445	5.93946	0.556784	0.457566	0.828862
CG10616	24.1914	29.8187	26.8955	25.2889	29.4296	33.5845	39.8127	26.0493	29.9689	30.7595	-0.242429	4.82261	6.12284	0.0152814	0.111572
CG10621	7.98067	10.949	20.7268	36.6689	9.89443	16.6621	50.6905	23.8785	16.5346	5.77906	-0.378032	5.50022	0.715129	0.400062	0.7594
CG10623	35.4142	28.6539	35.0381	28.0285	35.0111	34.1052	29.8051	29.0341	30.2273	31.6916	0.0642385	4.96352	0.398512	0.529511	0.909386
CG10625	4.73852	6.28988	2.46747	3.37185	2.79074	3.90517	1.958	3.79886	3.10023	3.35559	0.295211	1.99888	1.07516	0.302651	0.642183
CG10628	9.47704	11.6479	14.8048	11.5907	10.4018	15.1	17.1869	12.7533	15.7595	16.4051	-0.417147	3.69959	6.43613	0.0129618	0.100165
CG10631	172.333	208.032	180.619	194.514	213.111	180.94	81.5834	196.726	213.658	206.741	0.139719	7.34753	1.9546	0.165639	0.487447
CG10635	13.9662	13.5116	19.493	18.7559	17.5055	24.7328	27.1945	18.9943	22.2183	26.6583	-0.528458	4.40328	9.76338	0.00241769	0.0324045
CG10638	82.3007	51.4838	60.9466	73.5485	71.2906	73.6776	78.3201	58.0682	67.1717	64.5018	-0.00985274	5.41327	0.00756002	0.930912	1
CG10639	42.6467	40.3018	41.947	39.1978	37.2944	35.4069	47.6447	39.6166	37.9779	42.3177	-0.0136788	5.31354	0.0164565	0.898221	1
CG10646	12.7192	10.949	12.8309	10.537	8.87962	11.4552	16.0991	13.5673	11.3675	11.7445	-0.201484	3.50013	1.78894	0.184534	0.520614
CG10650	4.73852	9.31834	3.20772	10.9585	6.59629	7.28966	4.56867	6.24098	9.55905	4.47411	0.138561	2.11403	0.136583	0.712598	1
CG10651	0	0	0	0	0	0	0	0.271347	0	0	-1.52581	-0.80652	1.65726	0.241564	0.559103
CG10654	24.4408	25.3925	33.8044	23.603	25.1166	39.0517	38.5074	38.2599	36.9444	39.8942	-0.542816	4.77213	20.3734	1.98266e-05	0.00121926
CG10657	76.5645	48.4554	66.1283	55.8463	59.3666	50.5069	47.6447	43.1441	39.2696	41.572	0.462879	5.56239	9.64735	0.00255884	0.0339158
CG10659	0	0	0	0	0	0	0	0	0	0	0	-1.049	0	1	1
CG10660	20.2011	14.6764	19.9865	18.5452	13.4463	18.7448	23.0609	21.9791	18.8598	16.9643	-0.195105	4.17812	2.47976	0.118942	0.393245
CG10663	6.48429	4.89213	5.42844	5.05778	6.84999	3.90517	3.48089	3.25616	3.87529	4.47411	0.58221	2.47793	4.92262	0.0291049	0.165817
CG10669	17.9565	19.5685	22.9475	25.0782	22.8333	24.7328	23.0609	26.0493	26.352	24.4212	-0.198384	4.45886	3.09889	0.0818533	0.319673
CG10671	30.9251	29.5857	35.7784	33.9293	28.6685	33.5845	28.2823	27.406	30.744	33.183	0.0520494	4.96172	0.281825	0.596858	0.962649
CG10672	29.1793	32.3812	42.6873	39.83	33.9962	45.0397	52.4309	40.4307	38.4946	41.7584	-0.29296	5.34835	6.55363	0.0121898	0.09709
CG10674	16.4601	12.3468	10.8569	11.1693	9.13332	9.63276	17.8396	14.11	10.8508	13.6088	-0.145718	3.7177	1.06135	0.305757	0.646411
CG10680	88.7849	148.86	63.1673	122.44	102.75	54.1517	153.377	72.1783	67.4301	26.6583	0.494425	6.96691	1.70556	0.194998	0.538685
CG10681	11.2228	6.05692	7.89591	10.1156	7.6111	11.4552	12.1831	7.05502	8.26729	10.8124	-0.220038	3.07187	1.25855	0.265006	0.590799
CG10688	9.97584	13.9775	14.5581	14.5411	10.6555	12.4966	22.6258	11.6679	10.8508	13.9816	-0.174246	3.81924	1.3084	0.255816	0.578385
CG10694	0	0.232958	0	0	0	0.260345	0.217556	0	0	0	-0.714792	-1.1271	0.324808	0.570633	0.937155
CG10700	0	0.232958	0	0	0	0	0	0	0	0	1.52432	-1.19658	1.99948	0.236514	0.559103
CG10702	37.6588	42.8644	47.1287	39.83	36.5333	37.4897	33.0685	43.1441	34.8776	43.4362	0.0869903	5.29193	0.742193	0.391323	0.74936
CG10710	5.9855	7.45467	8.8829	7.37593	7.3574	6.24828	6.74423	7.05502	5.42541	5.59264	0.256364	2.62807	1.471	0.228464	0.559103
CG10713	25.189	28.6539	23.6877	22.76	28.1611	25.7741	19.58	31.2049	30.4856	28.5225	-0.076103	4.74892	0.474854	0.492592	0.868148
CG10721	20.2011	17.9378	19.9865	18.5452	14.2074	15.1	21.3205	20.0797	14.2094	19.9471	-0.000463466	4.28273	1.32413e-05	0.997105	1
CG10725	0	0	0	0	0	0	0	0	0	0	0	-1.13901	0	1	1
CG10730	0.249396	0.465917	0	0.210741	0.507407	0.260345	0.652667	1.08539	0	0.559264	-0.792782	-0.481186	1.13618	0.289405	0.625756
CG10731	7.48188	7.92059	10.6101	6.32222	5.58147	9.37242	13.2709	5.69828	5.68376	8.94823	-0.195466	3.37365	1.44943	0.231878	0.559103
CG10732	111.48	103.434	117.698	97.9945	125.329	129.391	74.6216	106.097	102.308	119.683	0.0629585	6.58014	0.347761	0.556909	0.929362
CG10734	0.249396	0.232958	0	0	0	0.260345	0	0	0	0	0.730879	-1.01926	0.349799	0.555912	0.928481
CG10737	414.496	378.325	338.537	324.541	341.992	328.555	258.239	297.396	306.923	339.101	0.232398	8.2595	8.21892	0.0051968	0.0545489
CG10738	10.4746	8.85242	10.6101	11.5907	10.9092	10.4138	4.78623	11.3966	7.75058	9.50749	0.265152	3.31074	2.21885	0.139944	0.438113
CG1074	12.9686	19.1026	17.2723	17.07	15.9833	18.7448	21.3205	17.9089	15.2428	16.4051	-0.120022	4.17683	0.932155	0.336974	0.684133
CG10747	35.6636	31.6824	28.1292	26.1319	27.9074	31.7621	38.7249	26.592	30.4856	31.6916	-0.0946084	4.95873	0.867941	0.354099	0.70445
CG10748	0	0	0	0	0	0	0	0	0	0	0	-1.29811	0	1	1
CG10749	0	0.232958	0	0	0	0	0	0	0	0	1.5243	-1.29809	1.81033	0.236514	0.559103
CG10750	0	0	0	0	0	0	0	0	0	0	0	-1.24678	0	1	1
CG10752	0.249396	0	0	0	0	0	0	0	0	0	1.53038	-0.90431	1.48662	0.236514	0.559103
CG10754	11.7216	10.7161	14.5581	15.3841	12.9389	17.7035	20.4502	16.5522	15.7595	18.2693	-0.442476	3.9491	13.1512	0.000483122	0.011479
CG10761	0	0	0	0	0	0	0	0	0	0	0	-1.2705	0	1	1
CG10764	0.748188	0.232958	0	0.210741	0.507407	0	0	0.542694	0.775058	0.372843	0.0169258	-0.560838	0.000331616	0.985513	1
CG1077	0.249396	0.698875	0.986989	0.421482	0	0	0.870223	0	0.258353	0.745686	0.214819	-0.519662	0.0665256	0.797072	1
CG10777	141.657	165.866	123.374	136.139	159.833	106.481	92.8963	135.673	147.261	134.969	0.236041	7.35355	4.69234	0.0330269	0.18095
CG10778	9.22765	12.1138	14.8048	15.8056	13.4463	20.5672	21.1029	16.5522	19.8932	15.8458	-0.517106	4.35681	18.9664	3.61361e-05	0.00187717
CG10793	0.249396	0.232958	0.246747	0.210741	0.253703	0	0	0	0	0	3.37978	-0.814787	5.94462	0.0171242	0.119299
CG10795	18.4553	12.8127	14.0646	15.8056	13.1926	14.8397	18.7098	16.5522	13.951	14.7273	-0.0843081	3.86211	0.389395	0.534247	0.913644
CG10799	15.2132	28.8869	26.402	41.0944	20.55	22.9103	46.9921	26.592	20.4099	9.32107	0.0772016	5.33231	0.0320382	0.858359	1
CG10801	0.249396	0	0	0	0	0.260345	0	0	0.775058	0	-1.57654	-1.17312	1.91473	0.172011	0.498222
CG10802	33.4191	30.9835	33.3109	31.8219	27.1463	34.3655	36.9845	39.3453	30.2273	38.03	-0.192394	4.93304	4.19055	0.0436608	0.212919
CG10803	32.6709	31.4494	24.6747	37.0904	32.9814	28.1172	29.37	35.5464	32.0357	37.6571	-0.0348628	5.38595	0.0886908	0.766557	1
CG10804	115.72	117.644	93.0237	105.792	118.479	83.3104	76.1445	97.6849	94.2988	92.6514	0.31058	6.64613	11.3814	0.00110858	0.0200251
CG10809	15.2132	15.6082	18.0126	17.4915	17.2518	18.4845	17.8396	16.0095	19.8932	21.8113	-0.173338	4.15883	1.98016	0.162929	0.481793
CG10814	0.249396	0.698875	0.246747	0.632222	0.253703	0	0	0	0.775058	0	1.42052	0.238209	1.10392	0.296603	0.635546
CG10822	0	0	0	0	0	0	0	0	0	0	0	-1.29814	0	1	1
CG10824	12.9686	15.6082	11.3504	13.2767	12.1778	9.63276	11.9656	9.76849	14.2094	11.7445	0.188433	3.95397	0.781732	0.379044	0.734848
CG10827	0	0	0	0.210741	0.76111	0.52069	0	0.271347	0	0	0.356192	-0.389113	0.118912	0.731131	1
CG10830	240.916	260.215	234.163	248.674	301.4	179.898	224.953	221.148	194.281	210.097	0.318631	7.93137	11.7071	0.000949883	0.0179948
CG10834	0	0	0	0	0	0	0.435112	0	0	0	-2.2236	-1.25523	3.19088	0.097688	0.346854
CG10839	0	0	0	0	0	0	0	0	0	0	0	-1.29797	0	1	1
CG10841	0.249396	0	0	0	0	0.260345	0	0	0	0	0.00767308	-1.03977	5.69675e-05	0.993996	1
CG10845	0	0	0	0	0	0	0	0	0	0	0	-1.29087	0	1	1
CG10853	0	0	0	0	0	0	0	0	0	0	0	-1.27038	0	1	1
CG10859	0	0	0	0.210741	0	0	0.217556	0	0	0.186421	-0.694451	-1.16224	0.379936	0.568582	0.93523
CG10862	0	0	0	0	0	0	0	0	0	0	0	-1.22587	0	1	1
CG10863	140.909	155.616	183.333	178.497	136.239	185.626	218.426	203.51	161.212	197.42	-0.282037	7.43044	8.05228	0.00565184	0.0575536
CG10864	4.23973	2.7955	2.46747	4.21482	3.55185	2.86379	1.958	3.52751	3.87529	3.35559	0.155263	1.66144	0.385501	0.536294	0.915646
CG10866	21.9468	20.7333	18.0126	23.603	22.8333	16.9224	19.58	15.4668	15.7595	17.71	0.323343	4.27847	5.69631	0.0191634	0.127206
CG10869	1.24698	1.39775	0.986989	0.421482	2.02963	2.86379	0.217556	0.542694	2.58353	1.30495	-0.293737	0.639035	0.398655	0.529437	0.909386
CG10874	20.2011	25.6254	22.7008	21.917	26.6389	28.6379	33.9387	22.7931	26.352	27.4039	-0.25175	4.74364	6.11182	0.0153705	0.111931
CG10877	3.99033	2.32958	4.44145	3.58259	3.29814	2.08276	5.22134	5.15559	2.84188	4.66054	-0.189701	1.88279	0.517159	0.47398	0.848123
CG10880	5.9855	6.05692	6.16868	6.53296	5.32777	5.72759	5.4389	7.32636	6.45882	7.45686	-0.107176	2.7144	0.251462	0.617312	0.982191
CG10881	0	0	0	0	0	0	0	0	0	0	0	-1.24817	0	1	1
CG10887	0	0.232958	0	0.210741	0	0	0	0	0	0	2.23865	-1.22075	3.71014	0.0941171	0.34456
CG10889	3.99033	3.72734	4.1947	4.42556	2.53703	3.38448	3.04578	5.96963	4.392	5.59264	-0.241127	2.30129	1.02575	0.313962	0.654982
CG10898	21.448	23.9947	23.6877	20.0204	22.3259	17.7035	21.1029	13.8387	20.1515	19.2014	0.271871	4.3067	6.1534	0.015037	0.110609
CG10899	0	0	0.246747	0	0	0	0	0	0	0	1.52961	-1.19973	1.69608	0.236514	0.559103
CG1090	367.36	382.984	273.396	326.016	377.003	254.617	239.746	270.533	273.079	287.462	0.381433	8.09805	14.4454	0.000266718	0.00765247
CG10903	8.97825	7.45467	8.14266	9.48333	7.3574	8.33104	13.2709	11.9393	8.00894	6.33833	-0.201548	3.18555	1.45209	0.231454	0.559103
CG10904	6.48429	10.0172	12.3374	12.8552	9.89443	13.7983	13.0533	8.6831	11.3675	6.33833	-0.0331455	3.38632	0.045703	0.973203	1
CG10907	5.48671	9.5513	11.1036	10.1156	8.11851	10.1535	11.9656	11.1252	9.04235	12.6767	-0.310338	3.32963	2.76435	0.0999778	0.351616
CG10909	0	0	0	0	0	0	0	0	0	0	0	-1.27631	0	1	1
CG1091	48.8816	45.4269	45.1548	44.4663	38.3092	46.6017	45.4692	48.2997	47.5369	42.8769	-0.0529495	5.39716	0.421133	0.518078	0.897927
CG10910	0	0	0	0	0	0	0	3.52751	0	0	-4.74208	-0.303139	5.46129	0.0230994	0.143211
CG10911	0	0	0	0	0	0.260345	0	10.0398	0	0.186421	-6.28796	1.63504	6.73281	0.0117537	0.0947505
CG10912	0	0	0	0.210741	0	0	0	2.44212	0	0.372843	-2.9428	0.0356266	3.25809	0.0753015	0.301188
CG10914	8.47946	8.38651	10.1166	7.58667	7.3574	10.4138	7.3969	8.6831	8.00894	8.01612	-0.0168715	3.03025	0.0105943	0.943081	1
CG10915	86.7898	81.0696	95.9847	80.0815	92.6017	98.15	70.4881	89.0018	93.2653	105.887	-0.0662824	6.46061	0.701053	0.40472	0.765375
CG10916	15.7119	17.2389	14.3113	16.8593	14.9685	19.7862	24.1487	16.8235	19.1181	17.71	-0.302674	4.06629	5.91189	0.017086	0.119294
CG10918	0.498792	0.465917	0.493495	1.0537	0.253703	0.52069	0.435112	0.542694	0.775058	0.372843	0.107345	-0.246781	0.0229898	0.879834	1
CG10919	0.498792	0.465917	0	0.210741	0	0	0.217556	0	0	0.559264	0.357656	-0.87661	0.137384	0.721831	1
CG1092	11.7216	12.1138	16.5321	23.603	12.1778	14.8397	27.6296	14.11	19.1181	15.1001	-0.250117	4.15709	1.87201	0.174761	0.504091
CG10920	0	0	0	0	0	0	0	0	0	0	0	-1.27055	0	1	1
CG10924	12.4698	17.9378	11.5971	13.9089	12.1778	19.2655	18.0571	16.2808	15.2428	16.7779	-0.327794	4.60565	1.57184	0.213292	0.559103
CG10927	1.24698	2.7955	3.94796	2.10741	0.76111	1.30172	3.916	2.98482	2.32517	2.6099	-0.277112	1.4439	0.585159	0.446363	0.81434
CG10931	0	0	0	0	0	0	0	0	0	0	0	-1.22248	0	1	1
CG10932	17.9565	24.2277	18.506	21.7063	14.7148	23.6914	28.4998	21.4364	21.7016	19.2014	-0.234188	4.52872	1.90656	0.170876	0.496481
CG10933	3.24215	3.02846	2.96097	2.95037	4.31296	3.12414	3.69845	2.44212	2.58353	2.98274	0.141579	1.86578	0.276797	0.603384	0.96953
CG10934	0	0.232958	0.246747	0	0.507407	0	0	0	0	0.186421	1.61149	-0.992387	2.1076	0.160189	0.476268
CG10936	11.4722	6.7558	9.86989	10.7478	7.3574	5.2069	7.17934	6.51232	7.23388	4.84696	0.582491	3.6398	5.08766	0.0266001	0.156174
CG10943	0	0	0	0	0	0	0	0.271347	0	0.186421	-2.22777	-0.918926	2.51551	0.117428	0.390045
CG10947	82.55	64.5295	64.6478	59.8504	70.0221	67.95	66.137	51.2845	52.1873	73.8229	0.129765	5.89156	1.03001	0.312966	0.654352
CG10948	71.0778	92.2516	93.5172	77.3419	82.961	93.7242	70.2705	106.368	88.0983	101.227	-0.139643	6.39119	2.42605	0.122956	0.40196
CG10949	7.23248	9.78426	13.5711	10.7478	11.9241	14.8397	16.9694	14.11	11.6259	15.473	-0.458579	3.62542	6.27268	0.0141219	0.106036
CG10950	0	0.232958	0	0.210741	0	0	0	0	0	0	2.23891	-1.07618	2.94991	0.0941171	0.34456
CG10953	0	0	0	0	0	0	0	0	0.258353	0	-1.52227	-1.12979	1.2274	0.273529	0.603844
CG10958	6.98309	9.31834	8.38941	13.0659	9.38702	9.37242	7.83201	15.1954	12.6593	12.6767	-0.281384	3.46654	2.81106	0.0971993	0.346854
CG10959	5.23731	3.72734	6.16868	4.6363	4.05925	3.64483	3.69845	4.0702	3.35859	7.08401	0.101283	2.2222	0.152158	0.750227	1
CG10960	205.003	221.776	145.828	178.919	186.218	160.893	182.312	137.301	168.704	176.914	0.182046	7.48649	3.17839	0.0780994	0.308542
CG10962	0.997584	1.16479	0.986989	2.31815	1.77592	3.38448	1.52289	1.89943	0.775058	2.6099	-0.478447	1.60197	0.859778	0.356361	0.707173
CG10969	0	0	0	0	0	0	0	0	0	0	0	-1.27012	0	1	1
CG10970	0	0.232958	0.246747	0.421482	0.76111	0.260345	0.435112	0.271347	0	0.559264	0.0485324	-0.434121	0.00367668	0.977755	1
CG10973	19.7023	17.7048	15.7918	19.1774	19.5352	16.1414	21.538	12.482	9.8174	15.8458	0.269057	4.05957	4.00802	0.0483929	0.22639
CG10979	35.1648	37.0404	36.2719	41.9374	38.0555	48.4241	40.2478	51.0132	55.0291	49.4017	-0.370748	5.66595	21.8894	1.04935e-05	0.00079423
CG10984	49.131	48.9213	71.8035	52.8959	58.6055	68.4707	66.7896	76.7911	70.272	68.4167	-0.31785	5.93901	8.09009	0.00554507	0.0566946
CG10993	0	0	0	0	0	0	0.217556	0.271347	0	0	-2.24242	-1.14461	3.56633	0.097688	0.346854
CG10996	0	0	0	0	0	0	0	0	0	0	0	-1.18168	0	1	1
CG11000	219.718	221.544	207.021	217.274	235.183	173.91	118.35	204.867	182.397	201.149	0.322045	7.70337	12.125	0.000779928	0.0159096
CG11007	20.4505	15.1423	13.0776	16.8593	24.3555	13.5379	18.0571	12.482	15.7595	17.71	0.203113	4.07638	1.91297	0.170166	0.495572
CG11018	0	0	0	0	0	0	0	0	0	0	0	-1.30545	0	1	1
CG11023	0	0	0	0	0	1.04138	0.435112	0	0	0	-3.62253	-0.982514	7.72689	0.00715852	0.0673835
CG11029	0.498792	0.698875	0	0.842963	0	0.52069	0	0.271347	0.775058	0.372843	0.14755	0.193556	0.0379243	0.846048	1
CG1103	22.1962	13.2786	11.1036	13.4874	16.4907	12.4966	16.5342	11.3966	11.6259	10.9989	0.275126	3.66931	2.24518	0.137644	0.433261
CG11030	23.1938	32.1483	26.1552	24.6567	29.937	30.981	29.8051	33.9184	30.744	35.4201	-0.242473	5.29467	3.82502	0.0536953	0.241636
CG11034	6.48429	4.19325	3.20772	3.79333	4.82036	4.94655	2.61067	3.25616	4.13364	2.6099	0.369881	2.48689	0.950316	0.332336	0.678587
CG11035	12.9686	17.2389	19.9865	12.6444	16.4907	15.1	21.7556	17.0948	14.9845	15.6594	-0.0967706	3.93979	0.381016	0.538669	0.918576
CG11037	0	0	0	0	0	0	0	0	0	0	0	-1.29789	0	1	1
CG1104	35.6636	45.6599	53.0507	45.0985	44.6518	53.3707	46.9921	45.5863	59.6795	48.2831	-0.178715	5.56914	2.44109	0.121817	0.39985
CG11041	1.24698	0	0.246747	0	1.01481	0	0.435112	0	0.516706	0.372843	0.743988	0.775977	1.02463	0.314224	0.655283
CG11043	0.498792	0.931834	0.246747	0.632222	1.01481	1.04138	0	1.08539	0.775058	0.186421	0.176687	-0.236393	0.0697127	0.792379	1
CG11044	27.4336	22.1311	22.7008	16.6485	17.7592	25.2535	19.58	14.6527	21.4433	18.4557	0.100824	4.44404	0.337999	0.562487	0.934488
CG1105	60.6032	50.0861	51.3234	52.053	52.7703	44.7793	54.8241	53.7267	50.8955	51.0795	0.0628725	5.52951	0.426647	0.515358	0.894417
CG11050	201.512	205.003	272.409	204.419	227.318	257.221	292.613	233.901	271.787	233.959	-0.21555	7.80562	5.72486	0.0188736	0.126179
CG11052	23.1938	23.7618	20.2333	24.6567	26.3851	19.7862	34.5914	25.7779	17.0513	27.5904	-0.083502	3.9357	0.255185	0.614722	0.979562
CG11060	0.249396	0.232958	0.493495	0	0.253703	0	0.217556	0.271347	0.258353	0.186421	0.320668	-0.778603	0.110054	0.740879	1
CG11068	0	0	0.493495	0	0.253703	0.260345	0.217556	0	0	0.186421	0.0412893	-0.660841	0.00136576	0.985436	1
CG11069	13.4674	11.182	7.64917	11.38	11.4167	7.81035	9.57246	6.78367	8.78399	7.45686	0.444637	3.21854	7.55839	0.00726059	0.068038
CG11070	53.1213	56.8419	54.5312	52.2637	58.8592	60.6604	51.3432	51.8272	56.5793	56.8585	-0.00884419	5.78004	0.0154528	0.901357	1
CG11073	188.543	184.27	230.709	197.253	191.8	206.714	170.346	180.717	204.357	183.625	0.0699986	7.57056	0.525614	0.470398	0.843959
CG11076	57.6105	59.6374	64.4011	60.6933	60.8888	58.8379	83.759	72.1783	55.5458	67.2981	-0.156303	6.03904	3.56309	0.0624049	0.265745
CG11077	42.8961	38.6711	31.8304	31.4004	37.5481	23.1707	40.9005	29.0341	21.7016	28.7089	0.339306	5.00976	6.56142	0.0121403	0.0969509
CG11085	3.24215	5.591	3.94796	5.05778	3.04444	4.16552	6.52667	6.51232	2.58353	4.66054	-0.221479	2.20716	0.878065	0.351321	0.70084
CG11089	44.3925	58.9385	41.2068	54.3711	44.3981	34.6259	50.9081	41.2447	35.6527	26.8447	0.365844	6.63662	0.778675	0.379973	0.736223
CG1109	23.1938	29.5857	29.6097	32.8756	29.1759	34.6259	29.1525	31.4762	34.6193	33.9287	-0.179421	4.91145	2.69392	0.104335	0.362093
CG11095	14.7144	12.5798	9.86989	15.1733	12.6852	13.0172	16.7518	14.3814	13.4343	12.4902	-0.105497	3.71223	0.478015	0.49116	0.866811
CG11099	230.691	211.06	184.567	182.712	194.59	178.857	188.621	181.531	174.388	184.93	0.14357	7.37259	3.88865	0.0517838	0.236534
CG11103	13.218	9.08538	10.3634	9.27259	12.1778	10.4138	15.4465	13.0246	11.6259	13.2359	-0.243762	3.49898	2.6571	0.106696	0.366913
CG11106	0	0	0	0	0	0	0	0	0	0	0	-1.30545	0	1	1
CG11107	59.1068	61.734	54.7779	57.743	60.1277	60.1397	55.9118	58.3396	60.4545	60.2141	-0.0076152	5.84323	0.0110847	0.916393	1
CG11109	10.2252	13.9775	10.3634	11.5907	12.4315	12.7569	18.7098	11.3966	9.3007	14.5409	-0.195246	3.68931	1.96479	0.164553	0.485332
CG11110	9.72644	9.5513	11.3504	8.21889	9.38702	7.28966	11.9656	10.0398	9.04235	11.1853	-0.048082	3.31522	0.0971531	0.756017	1
CG11112	0	0	0	0	0	0	0	0	0	0	0	-1.27047	0	1	1
CG11113	0	0	0	0	0	0	0	0	0	0	0	-1.29816	0	1	1
CG11122	95.5186	120.673	118.439	119.49	119.494	138.764	38.2898	122.92	139.51	154.543	-0.0495886	6.83584	0.122839	0.726821	1
CG11123	9.72644	11.415	17.0256	16.227	13.9537	20.8276	16.9694	18.7229	15.2428	16.4051	-0.362149	3.96146	6.89225	0.0102228	0.0858847
CG11125	5.23731	10.0172	6.16868	5.47926	9.13332	6.50862	8.91979	5.42694	5.94211	4.10127	0.222029	2.80898	0.893316	0.347193	0.696593
CG11127	20.2011	17.4719	21.7138	18.3344	19.5352	16.6621	27.412	20.0797	16.5346	19.3878	-0.0463836	4.27053	0.145134	0.704156	1
CG1113	4.48913	4.42621	5.18169	4.00407	3.55185	5.46724	3.916	5.15559	4.65035	4.47411	-0.121701	2.36141	0.250087	0.618274	0.983224
CG11131	0.249396	0	0	0	0	0.52069	0	0	0.258353	0	-1.21073	-1.05894	0.935778	0.336468	0.683396
CG11134	5.73611	6.7558	7.40242	7.58667	5.83518	9.89311	11.3129	7.32636	5.42541	4.84696	-0.211032	3.26588	0.737192	0.392917	0.75095
CG11137	79.8067	73.6149	57.2454	57.1107	66.724	66.9086	105.079	59.6963	52.1873	72.7043	-0.0961517	5.98195	0.717387	0.399322	0.759029
CG11138	81.3031	92.2516	97.9587	99.6804	103.765	96.588	61.5683	95.7854	86.5482	91.1601	0.139194	6.67524	2.28975	0.133848	0.425154
CG11141	28.6805	27.0232	29.1162	26.1319	22.8333	31.7621	29.1525	30.9335	34.3609	28.7089	-0.209447	4.77348	3.76354	0.0556144	0.246362
CG11145	0	0	0	0	0	0	0	0	0	0	0	-1.27208	0	1	1
CG11147	116.717	104.365	105.114	98.4159	103.511	71.8552	78.9728	77.8765	71.8221	57.7906	0.560831	6.67314	25.3673	2.53359e-06	0.000286347
CG11148	348.157	408.143	368.641	356.995	382.331	313.455	283.91	344.882	353.943	334.999	0.192805	8.44178	11.7084	0.000949267	0.0179948
CG11149	0	0	0	0	0	0	0	0.542694	0	0	-2.26093	-1.0655	2.15701	0.150808	0.458617
CG11151	57.1117	57.7737	60.2063	53.1067	52.2629	57.5362	87.0223	73.8063	53.7374	54.8079	-0.221243	6.06074	5.02311	0.0275514	0.160018
CG11155	897.077	780.877	483.625	639.809	777.601	359.016	500.813	457.219	404.58	418.516	0.741622	9.20832	21.2588	1.3655e-05	0.00094261
CG11158	13.218	12.5798	9.86989	14.1196	7.8648	10.9345	18.0571	10.8539	11.8842	10.626	-0.111845	3.34803	0.39994	0.528776	0.908747
CG11159	0	0.931834	0.246747	0	1.26852	0	0.217556	1.08539	0.516706	0.559264	0.0298356	-0.525429	0.00141505	0.970079	1
CG1116	28.9299	25.3925	28.3759	28.8715	30.6981	32.5431	35.4616	32.0189	29.9689	29.0817	-0.16092	4.94012	2.45071	0.121094	0.398181
CG11160	10.2252	7.68763	10.6101	8.00815	9.13332	9.63276	9.3549	10.8539	6.20047	10.0668	-0.0193182	3.23964	0.00615777	0.937633	1
CG11162	0	0	0	0	0	0	0	0	0.258353	0	-1.52246	-1.23464	1.16953	0.289002	0.625126
CG11164	0.997584	0.698875	0.246747	0.421482	1.26852	1.04138	0.217556	0	0.775058	1.49137	-0.0260107	0.679388	0.00128499	0.971486	1
CG11165	0	0	0	0	0	0	0	0	0	0	0	-1.29804	0	1	1
CG11168	28.6805	25.6254	29.1162	26.3426	26.1314	31.2414	22.4082	28.2201	27.9021	27.0311	-0.00764266	4.80266	0.00670177	0.990059	1
CG11170	5.73611	5.35805	5.67519	8.64037	5.32777	3.38448	4.78623	2.44212	3.35859	4.28769	0.736356	2.29598	10.7018	0.00153426	0.0244881
CG11178	16.9589	20.7333	18.9995	20.0204	19.0278	25.5138	14.1411	27.1347	27.9021	23.8619	-0.301873	4.46084	5.98935	0.0163986	0.116476
CG11180	3.99033	6.28988	7.89591	8.21889	6.84999	7.55	5.4389	11.1252	7.75058	7.64328	-0.233803	3.25645	1.14577	0.287391	0.622935
CG11190	34.4166	37.2734	36.2719	37.5119	32.9814	31.7621	33.9387	41.7874	33.5859	39.1485	-0.0140011	5.15463	0.0299729	0.862953	1
CG11191	23.942	23.9947	39.9731	30.1359	27.9074	46.8621	36.3318	47.2143	42.3699	48.4696	-0.599625	5.03348	16.6259	0.00010029	0.00383004
CG11192	0	0	0	0	0	0	0	0	0	0	0	-1.26967	0	1	1
CG11200	29.6781	23.7618	28.3759	25.7104	22.8333	22.9103	31.5456	26.8633	19.1181	19.3878	0.121897	4.73509	0.94542	0.333578	0.679795
CG11208	27.9323	32.3812	24.428	27.8178	30.9518	28.6379	35.4616	28.4914	29.7106	30.5731	-0.0929851	4.95774	0.629392	0.429732	0.794181
CG11210	102.502	89.2231	72.7905	78.3956	84.2295	57.5362	59.8278	62.6811	62.263	59.6549	0.500093	6.08668	25.1178	2.80074e-06	0.000306196
CG11211	164.601	114.616	139.906	233.501	92.0943	129.652	130.316	189.943	120.134	151.188	0.0480712	7.53658	0.0362651	0.849412	1
CG11221	34.4166	28.188	25.9085	28.6607	33.4888	21.6086	23.496	19.8083	25.5769	20.5064	0.440043	4.6826	13.8887	0.000343922	0.00923414
CG11226	0	0	0	0	0.253703	0.260345	0.217556	0	0.516706	0	-1.56017	-0.652961	1.65726	0.201381	0.550847
CG11227	0	0	0	0	0	0	0	0	0	0	0	-1.25466	0	1	1
CG11231	0	0	0.246747	0.210741	0.253703	0	0	0	0	0	2.72985	-1.18828	4.64862	0.0403344	0.204317
CG11236	3.24215	5.12509	6.66218	8.85111	2.79074	6.76897	14.7938	6.51232	3.35859	2.05064	-0.307216	3.56198	0.466666	0.496336	0.872103
CG1124	249.645	158.878	173.217	165.01	152.476	137.202	158.598	118.579	135.635	166.847	0.325172	7.18308	4.33604	0.0402445	0.204317
CG11241	24.6902	22.597	19.493	25.9211	25.624	24.2121	25.8891	25.7779	24.8019	27.4039	-0.115154	4.75234	0.9015	0.345005	0.694535
CG11247	81.0537	83.8651	81.4266	82.3996	94.3776	90.8604	79.843	81.1327	73.6305	92.8379	0.0154812	6.35644	0.0504627	0.911472	1
CG11248	25.9372	34.0119	39.4796	39.4085	39.8314	38.531	45.4692	43.1441	37.7195	40.6399	-0.201663	5.34136	3.20926	0.0766931	0.304641
CG11249	0.249396	0	0	0	0.253703	0	0	0	0	0.186421	0.769132	-0.852113	0.408454	0.55137	0.924495
CG11251	0	0	0	0	0	0	0	0	0	0	0	-1.27043	0	1	1
CG11257	7.23248	5.591	6.41543	5.26852	10.1481	9.11207	6.52667	6.51232	9.8174	6.89759	-0.165942	2.90357	0.637859	0.426658	0.790333
CG1126	1.24698	1.63071	1.23374	0.842963	1.01481	0.781035	1.30533	1.08539	1.55012	1.67779	-0.117751	0.674592	0.0815632	0.775868	1
CG11261	6.2349	3.49438	5.92194	5.90074	4.56666	2.86379	5.22134	3.25616	3.10023	2.6099	0.609196	2.27929	4.98131	0.0281867	0.162467
CG11262	0	0	0	0	0	0	0	0	0	0	0	-1.26261	0	1	1
CG11263	0.249396	0.698875	0.986989	0.842963	0.253703	0.781035	1.08778	1.08539	0.516706	0.932107	-0.511416	0.312357	0.667304	0.41622	0.779362
CG11266	312.992	326.142	275.864	273.12	306.727	321.526	271.945	329.415	286.255	327.542	-0.0398688	8.19618	0.51082	0.476694	0.851341
CG11267	60.6032	50.552	54.2844	55.4248	58.0981	65.0862	86.8048	60.239	54.7708	67.2981	-0.262965	5.7783	5.35511	0.0230134	0.142996
CG11269	0	0	0	0	0	0	0	0	0	0	0	-1.20639	0	1	1
CG11275	54.3683	44.2621	48.3625	49.5241	47.4425	37.4897	41.9883	39.0739	37.9779	37.2843	0.331496	5.42651	12.5562	0.000637194	0.0138061
CG11279	12.9686	10.949	10.6101	15.3841	13.9537	8.33104	14.5762	9.49714	11.1092	10.0668	0.24948	3.80888	2.51709	0.116239	0.387501
CG11284	41.6491	42.6314	47.1287	42.1482	45.1592	33.5845	45.6867	38.2599	39.7863	31.5052	0.212373	5.44402	4.45283	0.0377088	0.197543
CG11286	0	0	0	0	0	0	0	0	0	0	0	-1.27728	0	1	1
CG11289	0	0	0.246747	0.210741	0	0.260345	0	0.271347	0	0	-0.0140144	-1.1019	4.9398e-05	0.994416	1
CG1129	21.448	27.0232	25.6617	30.9789	23.087	22.9103	29.5876	31.4762	26.0936	23.6755	-0.0568013	4.62812	0.340809	0.637463	1
CG11291	0	0	0.246747	0	0	0	0.217556	0	0	0	0.0228501	-1.06033	0.000240377	0.991591	1
CG11294	5.9855	4.42621	4.93495	7.16519	5.83518	4.68621	6.52667	5.15559	6.97552	8.76181	-0.190549	2.80185	0.851255	0.358744	0.710015
CG11298	0	0	0	0	0	0	0	0	0	0	0	-1.30545	0	1	1
CG11300	0	0	0	0	0	0	0	0	0	0	0	-1.19243	0	1	1
CG11306	93.5235	102.036	80.9331	96.73	93.6165	77.5828	112.476	80.59	90.1651	90.4144	0.0479344	6.46993	0.395743	0.530941	0.91069
CG11307	9.97584	13.9775	13.0776	11.1693	13.4463	13.7983	17.622	13.296	12.9176	14.3544	-0.227598	3.74506	2.67413	0.105597	0.364791
CG11309	40.6515	39.8359	40.2198	42.7804	37.2944	43.2173	54.389	42.6015	43.92	34.488	-0.120979	5.61505	0.683352	0.410692	0.77239
CG11313	0	0	0	0	0	0.260345	0.217556	0	0	0	-2.23501	2.22878	1.82339	0.181728	0.51565
CG11317	51.8744	55.91	66.6218	52.6852	60.8888	70.0328	69.6179	82.2181	67.9468	74.0093	-0.337484	6.09997	12.3176	0.000712495	0.0149974
CG11318	1.74577	0.931834	0.740242	0.421482	0	0.52069	0.217556	1.35673	0.516706	0.932107	0.113875	0.124643	0.0378818	0.846134	1
CG11319	266.604	308.204	240.579	291.244	302.161	214.264	142.717	226.032	235.101	234.145	0.421343	8.07234	15.6613	0.00015406	0.00524839
CG11320	0.997584	0	0.493495	0	0	0	0	0	0.775058	0.745686	-0.137101	-0.358179	0.0230969	0.879556	1
CG11321	234.931	210.129	240.825	200.204	213.872	199.164	111.389	148.698	215.725	192.387	0.34284	7.46038	8.77751	0.00393027	0.0450285
CG11322	0.997584	0.232958	0	0.210741	0.253703	0.781035	0.217556	0.81404	0	0	-0.0168081	-0.463695	0.000307711	0.986045	1
CG11327	0.249396	0	0	0	0	0	0.217556	0	0	0	0.023667	-0.96472	0.000262669	0.991591	1
CG11329	0.249396	0.698875	0.246747	0.210741	0.507407	0	0.435112	1.35673	0.516706	0.559264	-0.540919	0.0700426	0.49404	0.484003	0.859988
CG11333	0	0	0	0	0	0	0	0	0.258353	0	-1.52253	-1.27627	1.81392	0.241564	0.559103
CG11334	24.4408	23.9947	27.1422	24.4459	26.6389	30.981	31.1105	22.2504	27.127	24.0484	-0.0979147	4.52922	0.468767	0.495371	0.871138
CG11337	10.4746	10.949	14.0646	11.1693	11.4167	16.4017	11.748	13.0246	15.2428	12.1174	-0.233917	3.69004	3.55404	0.0753394	0.301268
CG11340	0.249396	0.465917	0	0.210741	0	0.260345	0	1.08539	0.258353	0	-0.574497	-0.902667	0.309113	0.579793	0.946257
CG11342	2.49396	2.7955	1.97398	2.31815	2.02963	1.04138	2.39311	2.98482	2.58353	3.35559	-0.10075	1.46224	0.0907089	0.763995	1
CG11345	0	0.465917	0	0	0.507407	0.260345	0	0	0	0	1.57561	-0.937302	1.88871	0.174204	0.502657
CG11349	3.74094	4.65917	6.16868	4.84704	1.52222	4.68621	5.4389	4.34155	1.55012	1.49137	0.26775	0.689378	0.388668	0.534792	0.914202
CG11350	0	0	0	0	0	0	0	0	0	0	0	-1.17011	0	1	1
CG11353	4.73852	8.61946	3.94796	4.21482	3.04444	8.33104	8.48468	5.15559	10.0758	8.20254	-0.708507	2.87002	4.12602	0.0452745	0.216869
CG11356	0	0.465917	0	0	0.507407	0.260345	0.435112	0.542694	0	0	-0.28316	-0.869465	0.0817472	0.775622	1
CG11357	56.1141	56.6089	51.3234	52.2637	57.0833	44.7793	55.0416	46.943	48.0536	53.8758	0.134107	5.7618	2.81398	0.0970284	0.346854
CG1136	63.596	47.2906	48.6092	51.21	51.2481	25.2535	33.9387	32.5616	32.0357	26.8447	0.798277	5.15406	29.9071	4.26721e-07	7.28343e-05
CG11360	139.911	151.19	88.3355	132.345	147.655	86.6948	111.389	105.283	88.8733	104.582	0.407597	7.40139	3.8723	0.0522678	0.237836
CG11362	0.249396	0.232958	0	0	0.253703	0	0.217556	0	0.258353	0.186421	0.0403026	-1.01626	0.0013925	0.985436	1
CG11367	19.9517	14.4434	13.3244	14.9626	16.237	14.319	15.0114	10.8539	11.3675	10.2532	0.351843	3.82248	6.10136	0.0154556	0.112013
CG11368	693.071	380.188	362.719	362.053	376.242	329.336	502.989	363.605	235.101	384.028	0.259624	8.26512	2.55977	0.113233	0.380866
CG11369	0	0	0	0	0	0	0	0	0	0	0	-1.27014	0	1	1
CG1137	0	0	0	0.210741	0.507407	0.260345	0	0.271347	0.775058	0.186421	-0.890687	-0.632264	0.864163	0.355143	0.705604
CG11370	0	0	0.246747	0.210741	0	0.260345	0.217556	3.52751	0	0	-2.68022	0.294008	2.8319	0.0959876	0.346854
CG11373	0	0	0	0	0	0	0	0	0	0	0	-1.29816	0	1	1
CG11374	5.48671	7.92059	4.44145	5.90074	5.83518	2.60345	2.39311	2.71347	4.9087	2.98274	0.926937	2.38155	11.7488	0.000931326	0.0178038
CG11377	21.448	15.6082	24.1812	22.3385	22.3259	25.7741	33.9387	20.0797	20.4099	23.6755	-0.230511	4.61025	3.86425	0.0525082	0.23854
CG11378	24.6902	29.5857	26.402	27.1856	24.6092	27.5966	27.8471	29.8482	31.0023	25.9126	-0.0992292	4.74913	0.756094	0.386942	0.744122
CG11379	0	0	0	0.210741	0	0	0	0	0	0	1.51444	-1.24184	1.67311	0.236514	0.559103
CG1138	0	0	0	0	0.253703	0	0	0	0	0	1.53218	-1.291	2.00228	0.236514	0.559103
CG11380	0.997584	0.698875	1.48048	2.31815	1.77592	0.52069	0.652667	2.44212	1.55012	0.372843	0.453935	1.05799	1.16546	0.283315	0.617621
CG11381	0	0	0	0	0	0	0.217556	0	0	0.186421	-2.2124	-0.596603	2.84801	0.097688	0.346854
CG11382	0.748188	0	0	0	0	0	0	0	0	0.559264	0.0833914	-0.811252	0.0038503	0.950707	1
CG11384	0	0	0.246747	0	0	0	0	0.271347	0	0	0.00313069	-1.16638	2.42635e-05	0.996089	1
CG11388	145.897	135.815	129.049	129.606	129.896	113.51	131.404	115.322	127.11	122.106	0.136717	6.85171	3.33532	0.0712302	0.290095
CG1139	0.249396	0	0.493495	0.421482	0.507407	0	0.217556	1.08539	0	0.372843	0.0144316	-0.400082	0.000291203	0.986424	1
CG11391	1.24698	4.65917	0	0	0.253703	0.52069	0.217556	0	0.258353	0.372843	2.0442	2.83244	0.709405	0.401946	0.761508
CG11395	34.4166	57.7737	38.2458	74.6022	43.3833	33.8448	82.6712	46.4003	48.5703	14.168	0.146652	6.37588	0.139051	0.710131	1
CG11396	26.1866	23.7618	26.402	28.2393	33.2351	27.8569	33.5036	26.0493	25.5769	29.2682	-0.0489024	4.71742	0.217845	0.641851	1
CG11398	7.73127	4.89213	6.41543	7.16519	5.07407	6.50862	9.3549	7.05502	8.00894	8.20254	-0.326066	2.80146	3.37045	0.0697848	0.286171
CG11399	90.0319	86.6606	74.2709	78.3956	83.7221	71.0742	58.305	74.0777	67.6884	72.5179	0.265633	6.20105	9.05663	0.00342207	0.0411509
CG11400	21.6974	25.1595	21.467	41.7267	23.087	15.3603	28.2823	23.3358	16.7929	9.50749	0.526234	5.27972	3.39818	0.0686664	0.282902
CG11403	1.24698	1.63071	3.20772	2.95037	3.55185	3.64483	2.61067	4.6129	3.87529	6.52475	-0.761881	1.95935	7.23748	0.00855616	0.0762893
CG11404	0	0.232958	0.246747	0.210741	0.253703	0	0	0.271347	0.516706	0.372843	-0.26558	-0.826314	0.0727138	0.788063	1
CG11406	5.73611	3.26142	0.986989	2.95037	2.79074	3.64483	1.08778	1.35673	2.32517	3.35559	0.404893	1.26252	1.71988	0.193152	0.535438
CG11407	62.349	52.8816	60.4531	66.5941	58.3518	33.8448	32.8509	31.2049	22.9934	31.8781	0.974771	5.66476	47.0095	9.66625e-10	3.99894e-07
CG11409	2.24456	1.39775	1.97398	1.47519	1.77592	1.04138	2.17556	2.44212	0.775058	2.79632	-0.0906943	1.38374	0.0584756	0.80949	1
CG11412	34.666	42.3984	48.3625	40.0407	37.5481	47.6431	47.6447	47.4857	47.7953	46.7918	-0.224965	5.46305	3.35486	0.0704223	0.287586
CG11413	5.9855	4.89213	9.86989	6.11148	9.13332	4.94655	6.30912	3.52751	3.87529	4.66054	0.609032	2.63717	4.45418	0.0376806	0.197519
CG11414	38.6564	50.0861	53.2974	52.4745	41.8611	59.0983	43.7287	45.5863	51.1538	50.1474	-0.0771814	5.71926	0.658638	0.419252	0.782681
CG11417	1.49638	3.96029	6.66218	6.53296	3.29814	7.55	6.74423	9.22579	7.49223	8.01612	-0.81145	3.03368	5.16605	0.0254912	0.152392
CG11418	8.47946	11.6479	12.3374	11.8015	13.7	17.9638	15.0114	13.296	13.176	13.0495	-0.320063	3.63914	5.63847	0.0197649	0.129731
CG1142	5.9855	10.7161	13.5711	10.3263	10.4018	13.2776	16.9694	18.9943	10.8508	17.8965	-0.614674	3.68731	9.97304	0.00218274	0.0301991
CG11423	0.498792	0.232958	0	0.421482	0.76111	0.260345	0.217556	0.271347	1.80847	0	-0.331906	-0.497649	0.159062	0.691044	1
CG11425	17.4577	19.1026	11.3504	14.9626	15.4759	33.0638	31.328	33.647	35.6527	29.641	-1.05597	4.94032	16.1181	0.000125636	0.00455861
CG11426	2453.56	2334.48	2567.65	2533.31	2436.57	2652.13	2681.81	2341.18	2453.58	2601.14	-0.0465776	11.0573	0.156754	0.69313	1
CG1143	4.98792	6.98875	10.1166	5.90074	7.6111	8.59138	9.3549	8.41175	6.71717	6.89759	-0.167594	3.29229	0.667048	0.416309	0.779362
CG11436	11.4722	11.415	9.3764	9.90482	11.6704	10.6741	13.706	8.41175	9.04235	13.0495	-0.039674	3.39024	0.0862663	0.769677	1
CG11437	1.49638	1.16479	0.986989	1.0537	0	2.86379	1.74045	1.35673	5.16706	2.79632	-1.52598	1.44443	15.4003	0.000173197	0.00561445
CG11438	9.22765	11.415	10.8569	10.1156	4.82036	9.63276	6.09156	8.6831	16.0179	8.57538	-0.061672	3.76074	0.112966	0.80289	1
CG11444	27.1842	23.9947	36.5186	34.3507	31.2055	42.4362	52.4309	40.702	36.6861	35.7929	-0.440368	5.25013	10.7675	0.00148662	0.0241658
CG11447	11.4722	11.415	13.5711	6.95445	7.3574	9.11207	16.9694	14.3814	13.4343	10.0668	-0.334833	3.43547	4.27795	0.041573	0.208326
CG11448	225.953	263.476	294.37	245.934	271.97	278.048	205.155	296.039	277.213	306.104	-0.0658931	8.02675	0.858088	0.356832	0.707499
CG11449	0.997584	0.698875	0.740242	1.0537	0	2.86379	2.82823	2.17077	7.75058	3.16916	-2.35686	1.57752	33.3155	1.17765e-07	2.40258e-05
CG11453	1.49638	0.931834	0.493495	0.632222	0.507407	0.52069	0	1.08539	0.516706	0.745686	0.501258	0.899586	1.25455	0.33163	0.677724
CG11454	12.4698	13.9775	18.2593	14.9626	12.9389	14.8397	22.1907	15.7381	16.2762	19.015	-0.283177	3.96558	4.59898	0.0347736	0.186561
CG11455	172.083	136.281	147.061	135.506	129.135	115.333	174.48	137.301	119.617	142.612	0.0615549	6.98771	0.401292	0.528082	0.907941
CG11456	23.4432	23.9947	15.7918	18.7559	17.2518	17.9638	21.1029	11.3966	16.7929	16.2187	0.245201	4.31193	3.9171	0.050953	0.234082
CG11458	213.483	60.3363	97.7119	97.3622	116.45	42.4362	66.3545	67.0227	49.087	41.572	1.13523	7.21074	12.7571	0.000580188	0.0128882
CG11459	0.748188	2.32958	0.740242	3.16111	3.80555	2.86379	4.56867	4.34155	0.775058	0.186421	-0.189113	2.61929	0.0282677	0.86687	1
CG1146	66.8381	69.4216	74.0242	56.2678	82.4536	63.0035	70.9232	64.0378	58.9044	63.9425	0.119634	5.86716	1.16765	0.282864	0.617241
CG11470	0	0	0.246747	0	0.253703	0	0	0	0.258353	0.186421	0.0362227	-1.10541	0.000899299	0.988109	1
CG11474	37.9082	34.7108	41.4536	43.6233	39.324	39.0517	60.263	46.129	36.4277	45.114	-0.206148	5.33623	4.9624	0.0284791	0.163364
CG11475	1.49638	2.09663	1.72723	0.842963	0.76111	2.08276	1.30533	1.89943	1.03341	0.745686	-0.00182845	1.17676	1.50766e-05	0.996911	1
CG11486	270.345	297.721	231.202	238.137	268.672	228.322	168.606	254.523	226.575	217.927	0.253593	7.95774	11.1198	0.00125579	0.0216808
CG11498	5.73611	6.52284	9.86989	5.90074	7.10369	7.28966	3.69845	6.78367	3.61694	4.10127	0.473555	2.35922	4.91007	0.0293054	0.166675
CG11504	14.7144	13.0457	21.2203	15.8056	13.1926	23.1707	24.3663	29.3055	26.6103	28.1496	-0.754545	4.45027	19.0459	3.49214e-05	0.00182541
CG11505	189.292	193.356	169.515	179.762	213.365	151.26	109.866	175.561	182.397	186.421	0.230868	7.5563	5.42345	0.0221815	0.13959
CG11509	9.97584	7.22171	8.8829	8.42963	10.1481	12.4966	4.78623	12.482	9.55905	10.2532	-0.143557	3.3523	0.509251	0.47737	0.852176
CG11523	8.47946	11.415	9.86989	16.227	12.6852	14.319	16.0991	14.9241	16.0179	16.9643	-0.412824	3.8403	7.3059	0.00826101	0.0746122
CG11526	73.073	73.8478	78.4656	73.3378	72.0518	76.5414	60.6981	75.4344	79.3143	79.7884	-0.003579	6.18239	0.00244934	0.963653	1
CG11529	0.498792	0.232958	0.493495	0.421482	0.253703	1.04138	2.17556	0.81404	0.775058	1.11853	-1.60235	1.39749	7.76217	0.00654561	0.0634715
CG11534	17.7071	17.7048	22.9475	19.3882	18.2666	19.0052	16.3167	18.4516	22.9934	19.015	0.00536478	4.11005	0.00189066	0.965417	1
CG11537	306.508	325.443	262.786	289.769	320.174	306.686	248.884	323.988	316.482	324.373	-0.0149028	8.3748	0.0438245	0.834669	1
CG11539	3.99033	4.65917	4.6882	2.73963	3.29814	4.94655	7.17934	4.0702	4.65035	4.47411	-0.392719	2.20742	3.15369	0.0792448	0.312109
CG11550	105.245	86.6606	89.816	94.2011	83.2147	61.7017	71.5759	46.943	51.4122	77.9241	0.5639	6.09425	12.0573	0.00080516	0.0161748
CG11555	3.74094	7.68763	10.3634	12.223	6.59629	7.28966	13.4885	9.76849	9.8174	9.50749	-0.290516	3.35254	2.17468	0.143901	0.446244
CG11560	12.7192	11.182	14.0646	11.5907	11.9241	14.5793	18.0571	14.9241	10.8508	12.4902	-0.207131	3.66985	2.13702	0.147377	0.452426
CG11562	7.23248	6.05692	12.5841	10.7478	11.1629	9.89311	13.4885	11.1252	10.8508	11.931	-0.265803	3.45799	2.35953	0.128142	0.413522
CG11563	8.97825	7.92059	7.40242	11.8015	7.10369	11.7155	14.7938	8.41175	6.20047	8.57538	-0.199791	3.37861	0.922757	0.339409	0.687474
CG11566	0	0	0	0	0	0	0	0	0	0	0	-1.30545	0	1	1
CG11570	0	0	0	0	0	0	0	0	0	0	0	-1.23573	0	1	1
CG11576	54.3683	50.319	47.6222	47.4167	49.2185	46.8621	48.9501	46.129	41.0781	49.0288	0.0997522	5.55636	1.47314	0.228129	0.559103
CG11577	29.4287	30.9835	29.6097	27.8178	36.5333	29.6793	40.9005	27.1347	23.2517	28.5225	0.0418184	4.94699	0.156724	0.746313	1
CG11581	0	0	0	0	0	0	0	0	0	0	0	-1.30545	0	1	1
CG11583	8.47946	9.78426	11.1036	8.85111	8.11851	13.0172	13.4885	11.6679	8.00894	9.88033	-0.273548	3.45951	2.10125	0.150767	0.458617
CG11584	0	0	0	0	0	0.52069	0	0	0	0	-2.25493	-1.24103	1.99585	0.17102	0.496571
CG11585	0.748188	1.16479	0.493495	0	0.507407	0	0.217556	0.271347	0.258353	1.67779	0.118811	-0.465457	0.022164	0.882012	1
CG11586	14.9638	17.2389	20.2333	17.913	12.9389	23.6914	22.8434	25.7779	20.6682	21.9977	-0.461329	4.39157	6.2379	0.0143825	0.107443
CG11588	0	0	0	0	0	0	0	0	0	0	0	-1.30545	0	1	1
CG11590	9.72644	7.92059	13.0776	8.21889	10.4018	10.6741	10.6602	13.0246	9.04235	8.20254	-0.0611656	3.29748	0.125419	0.724085	1
CG11593	44.8913	44.2621	41.7003	46.5737	47.6962	43.2173	39.5952	46.943	46.5035	45.114	0.0250947	5.54131	0.104248	0.747563	1
CG11594	20.9493	27.4891	38.7393	47.8382	28.1611	37.2293	68.3125	33.9184	32.0357	20.8792	-0.232603	5.86694	0.756814	0.386717	0.74386
CG11596	19.7023	22.8299	17.7658	18.1237	19.2815	20.8276	23.9311	21.9791	22.4767	17.3372	-0.122197	4.46541	0.976637	0.325766	0.670252
CG11597	9.22765	9.31834	5.18169	5.69	6.08888	6.50862	6.52667	5.69828	8.26729	5.59264	0.126156	2.75985	0.36865	0.545319	0.924495
CG11598	0	0.465917	0	0	0	0	0	0	0	0	2.24783	-1.18425	3.16362	0.0941171	0.34456
CG11600	0	0	0	0	0	0	0	0	0	0	0	-1.25488	0	1	1
CG11601	26.6854	29.1198	20.48	25.0782	28.1611	19.5259	33.286	17.6375	22.735	19.7607	0.193393	4.69927	2.33992	0.129717	0.416783
CG11608	0	0	0	0	0	0	0	0	0	0	0	-1.30545	0	1	1
CG1161	89.0343	80.3707	90.803	86.193	81.9462	91.3811	114.869	105.011	90.9402	96.1934	-0.218849	6.3586	6.94326	0.00995656	0.0842556
CG11617	10.4746	6.7558	13.5711	8.64037	9.13332	10.4138	12.8358	12.7533	10.0758	12.6767	-0.280594	3.28775	2.70502	0.103634	0.360393
CG11619	11.4722	7.92059	6.41543	9.48333	11.4167	8.59138	8.26712	6.24098	6.71717	8.57538	0.273522	3.33613	2.23638	0.138408	0.434932
CG11626	0.498792	1.63071	1.23374	1.68593	1.77592	1.30172	0.870223	1.89943	2.58353	1.11853	-0.146594	1.49975	0.196857	0.744425	1
CG11629	0	0	0	0	0	0	0	0	0	0	0	-1.30545	0	1	1
CG11630	0	0	0.246747	0	0	0	0	0.271347	0	0	0.00314113	-1.16048	3.07878e-05	0.995591	1
CG11634	0	0	0	0	0	0	0	0	0	0	0	-1.29804	0	1	1
CG11635	0.748188	0.232958	0	0	0.253703	0.52069	0.652667	0	1.55012	0.559264	-1.36183	-0.540043	2.22203	0.139664	0.437482
CG11638	43.8937	44.0292	53.2974	48.8919	50.487	50.5069	46.7745	57.2542	42.6282	60.9598	-0.103023	5.76561	0.694511	0.406912	0.767526
CG11652	20.2011	17.006	18.0126	14.5411	16.4907	16.4017	17.1869	16.0095	17.0513	16.5915	0.0484283	4.45438	0.177265	0.699294	1
CG11655	25.4384	20.7333	18.0126	21.2848	17.7592	25.5138	22.6258	24.6926	21.4433	22.3706	-0.174104	4.53852	1.98589	0.162328	0.480792
CG11656	0	0	0	0	0	0	0	0	0	0	0	-1.16532	0	1	1
CG11658	119.959	111.354	112.023	99.8911	103.765	86.1742	98.5528	109.081	81.8978	93.3971	0.221298	6.61518	8.79524	0.00389576	0.0447865
CG11659	0	0	0	0	0	0	0	0	0	0	0	-1.2632	0	1	1
CG11663	0	0	0	0	0	0	0	0	0	0	0	-1.30545	0	1	1
CG11664	0	0	0	0	0	0	0	0	0	0	0	-1.30545	0	1	1
CG11665	166.846	136.048	106.842	117.172	135.478	95.0259	110.736	92.8006	96.6239	101.04	0.415412	6.74813	13.6688	0.00038046	0.00994156
CG11666	0	0	0	0	0	0	0	0	0	0	0	-1.2982	0	1	1
CG11668	7.48188	5.82396	8.14266	6.7437	6.34258	6.76897	9.3549	5.96963	6.20047	7.8297	-0.0762024	3.18321	0.141223	0.707982	1
CG11670	0	0	0	0	0	0	0	0	0	0	0	-1.26917	0	1	1
CG11671	0	0	0	0	0	0	0	0	0	0	0	-0.943543	0	1	1
CG11672	0	0	0	0.210741	0	0	0.217556	0.81404	0	0	-1.58151	-0.344313	0.473124	0.496065	0.871894
CG11674	0.249396	0.232958	0	0.210741	0.507407	0.260345	0.435112	1.62808	0.258353	0.559264	-1.27742	1.647	1.69178	0.196794	0.542468
CG11679	4.48913	7.68763	6.16868	6.32222	5.07407	7.28966	10.4427	5.42694	6.45882	6.89759	-0.298223	2.81822	2.10552	0.150357	0.458155
CG11686	47.6346	31.9153	23.9345	31.6111	29.1759	21.0879	27.6296	15.4668	20.1515	15.1001	0.72288	4.32082	15.0947	0.000198743	0.00617915
CG11693	0	0.232958	0.986989	0.421482	1.01481	0.260345	0.435112	0.542694	1.29176	0.372843	-0.111206	-0.640104	0.0228989	0.880203	1
CG11694	0	0	0	0	0	0	0	0	0	0	0	-1.30545	0	1	1
CG11695	11.2228	12.3468	17.2723	15.1733	13.9537	24.4724	20.2327	21.7077	22.4767	21.6249	-0.656246	4.18668	14.9877	0.000208576	0.00641332
CG11696	9.72644	11.182	14.3113	15.1733	10.9092	15.881	11.9656	15.1954	13.4343	16.5915	-0.249954	3.85042	3.13139	0.080295	0.315429
CG11697	0	0	0	0	0	0	0	0	0	0	0	-1.28335	0	1	1
CG11698	0	0	0	0	0	0	0	0	0	0	0	-1.25524	0	1	1
CG11699	23.4432	24.4606	32.8174	26.5533	22.0722	30.2	40.2478	30.1195	32.0357	30.946	-0.339316	4.8116	8.41456	0.00471081	0.0505832
CG11700	2.24456	2.56254	1.48048	1.26444	1.52222	1.30172	2.82823	1.62808	0.775058	0.745686	0.310426	1.37136	0.590696	0.444227	0.811753
CG11703	0	0	0	0	0	0	0	0	0	0	0	-1.30545	0	1	1
CG11710	15.2132	16.3071	22.7008	18.7559	23.087	21.0879	20.0151	18.4516	18.8598	24.0484	-0.0983016	4.49104	0.750932	0.38856	0.746194
CG11714	0.249396	0.698875	0.246747	0	0	0	0	0	0.258353	0	1.85961	-0.707026	2.92427	0.0908136	0.342666
CG1172	18.2059	24.4606	25.1682	21.7063	25.1166	24.2121	18.7098	26.0493	19.6348	22.557	0.0467243	4.90677	0.186036	0.667301	1
CG11722	19.2035	14.6764	13.3244	15.5948	15.9833	16.4017	25.0189	18.4516	12.4009	21.252	-0.255325	3.93336	3.22418	0.0760232	0.302844
CG11723	25.9372	20.7333	20.7268	17.07	21.5648	19.5259	26.3243	16.8235	19.1181	21.0656	0.0365784	4.32976	0.111756	0.876859	1
CG11726	0	0	0	0	0	0	0	0.271347	0	0	-1.52674	-1.28351	1.5772	0.241564	0.559103
CG11737	43.1455	42.3984	38.2458	44.4663	41.3536	37.2293	36.9845	36.0891	31.2607	33.5559	0.259998	5.17339	5.29318	0.0237957	0.145963
CG11739	60.3538	70.8194	62.4271	79.0278	63.9332	72.8966	104.209	67.294	71.5637	60.9598	-0.162581	6.45832	1.12606	0.291548	0.628645
CG11741	1.49638	3.02846	1.23374	4.42556	0.507407	3.38448	7.17934	3.25616	0.516706	1.49137	-0.532504	1.97037	0.760385	0.385604	0.742655
CG11752	117.964	76.8763	82.1669	71.0196	67.7388	78.1035	118.568	86.0169	75.439	92.0922	-0.117449	6.17695	0.771384	0.382204	0.73816
CG11753	34.1672	22.364	26.402	21.0741	22.8333	22.65	31.5456	19.537	20.4099	21.6249	0.126054	4.51148	0.836832	0.362828	0.715096
CG11755	7.73127	6.7558	6.16868	7.79741	8.62591	6.76897	6.74423	6.51232	4.13364	5.77906	0.30663	2.65281	2.35922	0.128166	0.413522
CG11756	0	0	0	0	0	0	0	0	0	0	0	-1.24246	0	1	1
CG11760	1.74577	0.931834	0.986989	0.421482	0.507407	0.52069	0.652667	1.08539	1.03341	0.186421	0.42526	0.43335	0.663015	0.417716	0.780948
CG11762	0	0	0	0	0	0	0	0	0	0	0	-1.24226	0	1	1
CG11768	0.498792	0.465917	0	0.421482	0	0	0	0	0	0.186421	2.11479	-0.798798	3.19265	0.0774463	0.306546
CG11771	65.5911	60.5692	73.5307	63.0115	62.411	61.9621	63.0912	61.053	70.0136	73.0772	-0.0194314	5.98614	0.0753599	0.784336	1
CG11777	5.48671	4.19325	5.18169	5.05778	6.59629	5.98793	6.52667	5.69828	4.65035	8.20254	-0.243264	2.55969	1.2882	0.259491	0.58403
CG11779	59.3562	55.6771	57.4921	50.7885	49.9796	53.1104	64.6141	61.5957	51.6706	60.9598	-0.0967344	5.66048	1.36499	0.245859	0.564873
CG11781	14.7144	14.9093	10.1166	10.7478	8.87962	13.0172	16.7518	9.76849	8.00894	11.3717	0.00494168	3.50468	0.000916333	0.97592	1
CG11786	0	0	0	0	0	0	0	0	0.258353	0	-1.52224	-1.10953	1.81452	0.241564	0.559103
CG11788	3.74094	3.49438	4.6882	5.90074	3.80555	4.42586	6.30912	5.42694	5.42541	5.77906	-0.336299	2.24569	2.00441	0.160405	0.476402
CG11790	56.8623	57.7737	48.6092	59.0074	50.487	47.1224	69.4003	45.5863	49.6037	50.893	0.0530508	5.63097	0.338492	0.562203	0.934138
CG11791	131.93	134.65	124.607	129.816	129.135	103.097	131.839	107.453	104.375	102.905	0.241782	6.82548	6.43029	0.0130015	0.100219
CG11796	62.349	44.4951	66.6218	77.3419	57.0833	28.3776	51.7783	35.0037	22.735	13.2359	1.03134	6.19024	16.8328	9.15286e-05	0.00361828
CG11802	24.6902	23.7618	28.1292	22.3385	27.9074	30.981	34.8089	27.1347	23.2517	33.9287	-0.248758	4.67915	4.1697	0.0441754	0.21418
CG11807	53.3707	48.9213	42.4405	44.0448	43.8907	42.1759	53.0836	38.8026	40.8197	41.572	0.102345	5.39831	1.26638	0.263536	0.589406
CG11808	1.49638	1.63071	2.46747	3.37185	2.53703	6.24828	4.78623	2.71347	5.94211	4.66054	-1.0649	2.03587	12.4718	0.000662862	0.0141675
CG11811	23.1938	24.2277	30.1032	20.4419	25.8777	23.1707	30.8929	26.3206	23.2517	28.1496	-0.0949134	4.7097	0.808977	0.370901	0.724265
CG11815	0	0	0	0	0	0	0	0	0	0	0	-1.30545	0	1	1
CG11816	0.249396	0.232958	0.493495	0	0	0	0	0	0.258353	0	1.57728	-0.889266	1.76582	0.187534	0.526229
CG11825	0.498792	0.232958	0.740242	0.842963	0.76111	0.260345	1.30533	0.81404	0.516706	0.559264	-0.174222	1.12931	0.110823	0.740008	1
CG11828	0.249396	0.465917	0.246747	0	0.507407	0.260345	0.652667	0.271347	0.775058	0.559264	-0.776659	-0.255339	1.13105	0.290488	0.626967
CG11835	22.9444	19.1026	25.415	16.227	19.2815	30.7207	24.5838	22.7931	28.6772	28.1496	-0.39246	4.29585	4.64963	0.0338142	0.18352
CG11836	3.74094	4.65917	3.70121	2.52889	3.04444	2.86379	5.22134	2.71347	4.392	3.35559	-0.0788455	2.09792	0.0683737	0.794336	1
CG11837	5.48671	3.72734	3.70121	3.79333	4.56666	6.24828	7.3969	5.69828	6.97552	3.72843	-0.490662	2.53133	5.28932	0.0238454	0.146121
CG11839	2.99275	3.72734	4.6882	2.95037	2.53703	2.86379	6.52667	4.34155	3.10023	6.15191	-0.463932	2.27813	3.94274	0.0502168	0.231462
CG11841	13.7168	18.6367	18.2593	23.3922	19.0278	21.3483	26.1067	16.8235	18.8598	15.1001	-0.0741936	4.62547	0.0814129	0.776069	1
CG11842	6.2349	14.4434	4.1947	12.8552	10.4018	10.4138	21.7556	8.6831	3.61694	3.16916	0.023585	4.35199	0.00244283	0.960694	1
CG11843	0.249396	0.698875	1.48048	1.0537	1.77592	1.82241	1.08778	0.271347	3.10023	0.559264	-0.350303	0.564365	0.484967	0.488034	0.864375
CG11851	16.7095	14.2105	8.8829	14.1196	13.9537	7.55	12.6182	13.5673	9.8174	12.8631	0.261073	3.68715	1.7482	0.189561	0.52926
CG11852	5.9855	5.35805	6.16868	8.21889	6.08888	4.68621	4.56867	4.0702	5.16706	1.86421	0.669162	2.79312	6.304	0.0138915	0.105067
CG11854	0.997584	0.232958	0.493495	1.0537	0.76111	0.260345	0.217556	1.08539	0.258353	1.11853	0.235782	0.270091	0.157925	0.692045	1
CG11857	104.746	97.6096	82.1669	92.9367	104.526	80.7069	98.7703	79.776	78.0225	79.4155	0.209124	6.43884	8.07541	0.00558627	0.0570108
CG11858	2.74336	4.89213	7.40242	5.90074	3.04444	10.6741	8.91979	10.8539	7.49223	8.38896	-0.934305	3.01654	18.6356	4.16715e-05	0.00208113
CG11864	0	0	0	0	0	0	0	0	0	0	0	-1.30545	0	1	1
CG11865	0	0	0	0	0	0	0	0.271347	0	0	-1.52674	-1.27661	1.65189	0.241564	0.559103
CG11873	159.613	199.18	169.022	184.609	190.278	176.774	90.0681	187.229	204.099	211.961	0.0534705	7.52608	0.26148	0.610398	0.976298
CG11876	346.66	268.834	333.602	263.215	270.955	314.497	382.246	309.878	297.622	337.609	-0.147081	8.14185	2.19419	0.142137	0.442794
CG11878	0	0.232958	0	0	0.253703	0	0	0.81404	0.258353	0	-0.855184	-0.355931	0.511961	0.476203	0.850828
CG11880	88.7849	92.0186	78.2189	72.4948	77.6332	66.9086	68.3125	65.3946	70.7887	68.2302	0.268098	6.04937	11.2553	0.00117719	0.0207865
CG11882	3.49154	2.7955	2.46747	2.31815	2.53703	3.12414	3.48089	1.89943	1.29176	2.42348	0.137344	2.328	0.315286	0.645818	1
CG11883	116.967	106.229	104.127	104.317	127.359	98.6707	89.633	101.212	100.758	100.481	0.187629	6.83847	7.11208	0.00912605	0.0796242
CG11885	8.23007	6.05692	7.40242	4.42556	4.31296	5.72759	7.61445	4.88424	6.20047	6.89759	-0.0545951	2.50323	0.0584322	0.809559	1
CG11889	0	0	0	0	0	0	0	0	0	0	0	-1.29058	0	1	1
CG11891	0	0	0	0	0	0	0	0	0	0	0	-1.30545	0	1	1
CG11892	5.23731	5.35805	4.93495	3.16111	1.52222	2.3431	4.78623	6.51232	3.61694	2.6099	0.0346266	1.34934	0.00912193	0.92413	1
CG11893	0.249396	0	0	0	0	0	0.435112	0	0	0	-0.703949	1.96362	0.482448	0.568582	0.93523
CG11897	39.654	47.2906	46.6352	38.5656	39.8314	45.3	31.7631	38.8026	49.087	44.5547	0.0176097	5.56421	0.0186009	0.891831	1
CG11898	0	0	0	0	0	0	0	0	0.258353	0	-1.52201	-0.935074	1.46512	0.241564	0.559103
CG11899	19.2035	25.1595	32.8174	43.6233	20.8037	40.3535	54.1714	28.4914	37.9779	28.8953	-0.417237	5.8856	2.6048	0.110155	0.374349
CG11902	31.1745	30.0516	35.0381	37.3011	31.9666	30.4604	23.9311	36.6318	30.4856	33.3694	0.0982849	4.96367	0.916592	0.341019	0.689249
CG11905	0.498792	0	0.246747	0.210741	0.507407	0	0.217556	0.271347	0.516706	0.186421	0.262498	-0.457943	0.0772246	0.781752	1
CG11906	11.4722	10.7161	13.8179	11.38	10.9092	12.2362	10.2251	13.8387	13.4343	12.3038	-0.0865286	3.77375	0.332832	0.565483	0.93523
CG11911	0.249396	0	0	0	0.253703	0	0	0	0	0	2.25581	0.885354	1.65977	0.203918	0.555059
CG11912	0	0	0	0	0	0	0	0	0	0	0	-0.879899	0	1	1
CG11913	0.498792	0.465917	0.246747	0.632222	1.01481	0.52069	0.217556	0.542694	0	0.372843	0.752819	-0.568715	0.943235	0.334134	0.680432
CG11920	9.72644	7.22171	5.92194	6.53296	7.8648	6.24828	13.2709	8.1404	6.97552	6.71117	-0.157194	3.05901	0.660299	0.418668	0.781853
CG11927	10.9734	11.6479	14.5581	12.4337	12.1778	15.3603	19.1449	14.6527	16.2762	16.5915	-0.411063	3.83168	9.74728	0.00243679	0.0325561
CG11929	0	0	0	0	0	0	0	0	0	0	0	-1.26525	0	1	1
CG11951	17.4577	14.6764	13.8179	16.8593	17.5055	9.37242	12.6182	8.6831	15.7595	7.08401	0.591797	3.97554	8.32462	0.00492807	0.0523045
CG11961	36.1624	35.8756	34.5446	35.8259	34.7574	30.7207	36.5494	29.0341	34.6193	31.5052	0.124275	5.13933	1.55614	0.215572	0.559103
CG11964	9.97584	16.5401	23.441	18.1237	12.4315	26.5552	22.1907	21.7077	24.8019	23.4891	-0.556358	4.34834	9.17256	0.00323152	0.0394264
CG11966	0	0	0	0	0	0	0	0	0.258353	0	-1.5223	-1.14771	1.54872	0.241564	0.559103
CG11970	39.654	44.2621	47.1287	44.2556	41.6074	48.4241	30.2403	48.8424	48.5703	44.5547	-0.0214725	5.37971	0.0498326	0.921321	1
CG11975	45.3901	38.2052	34.0511	38.1441	39.0703	28.1172	40.4654	30.6622	31.7774	28.3361	0.288752	5.09765	6.93016	0.0100242	0.0846844
CG11977	0	0	0	0	0	0	0	0	0	0	0	-1.19954	0	1	1
CG11980	21.1987	27.955	21.7138	25.9211	21.8185	22.65	36.5494	27.406	29.4522	24.794	-0.246817	4.61669	3.83562	0.0533717	0.240633
CG11982	46.1382	41.6996	55.7649	51.6315	43.8907	54.6724	51.1256	50.1992	48.312	51.0795	-0.0945591	5.52815	1.05126	0.308054	0.649378
CG11983	4.98792	1.63071	3.45446	4.00407	0.76111	3.64483	5.00378	3.25616	1.55012	5.03338	-0.33142	2.05235	1.61645	0.20697	0.559103
CG11984	146.146	135.815	211.709	149.837	158.057	204.631	146.85	195.641	191.181	200.589	-0.228118	7.45499	3.81703	0.0539405	0.242479
CG11985	12.2204	9.08538	13.3244	12.4337	9.64073	8.85173	13.0533	10.5825	10.3341	11.931	0.0447348	3.54583	0.0813141	0.799297	1
CG11986	3.74094	5.591	2.71422	5.05778	7.10369	4.16552	6.09156	5.15559	5.42541	6.33833	-0.174944	2.66241	0.750074	0.38883	0.746381
CG11997	2.99275	2.32958	2.46747	1.26444	1.77592	2.60345	2.39311	0	0.258353	1.67779	0.598442	0.440799	1.58537	0.21135	0.559103
CG11999	15.9613	14.2105	13.0776	13.6981	12.4315	16.1414	25.6716	17.3662	15.7595	20.3199	-0.462926	4.02638	8.93349	0.0036373	0.0429063
CG12003	0	0	0	0	0	0	0	0	0	0	0	-1.29152	0	1	1
CG12004	187.296	160.508	145.581	154.684	167.698	128.09	162.732	151.683	140.802	153.238	0.146623	7.28193	3.49579	0.0648819	0.272033
CG12006	52.8719	49.1542	54.5312	49.1026	48.711	48.1638	46.5569	45.3149	46.5035	43.4362	0.145801	5.69449	3.46027	0.0662321	0.275657
CG12007	21.6974	23.2958	26.8955	22.9707	24.1018	26.0345	29.5876	23.3358	29.1939	24.2348	-0.154522	4.60522	2.15742	0.145483	0.448569
CG12009	0	0	0	0	0	0.260345	0	0	0	0.186421	-2.22446	-1.05345	3.23776	0.097688	0.346854
CG12010	5.23731	9.08538	4.1947	6.7437	5.58147	8.59138	6.09156	6.78367	5.42541	4.84696	-0.0257963	2.68208	0.0129769	0.998396	1
CG12011	1.49638	0	0.740242	0.210741	0.507407	0.52069	0.652667	0	0.775058	1.30495	-0.225779	0.134776	0.0660289	0.797815	1
CG12012	33.1697	29.5857	23.6877	23.1815	30.6981	21.6086	32.8509	27.6774	24.0268	21.9977	0.128794	4.7813	1.20945	0.274469	0.604881
CG12014	7.23248	7.45467	9.12965	5.26852	5.32777	8.59138	10.4427	5.96963	8.26729	9.13465	-0.312026	3.22013	3.54726	0.0629782	0.266551
CG12016	0.249396	0.232958	0	0.210741	0	0	0	0	0	0.186421	1.23127	-0.632519	0.789337	0.376746	0.731664
CG12017	0	0.232958	0	0.421482	0	0	0.435112	0	0.258353	0	0.000444301	-0.546845	5.60289e-06	0.998117	1
CG12018	4.48913	3.72734	5.67519	3.37185	3.55185	6.24828	3.69845	4.88424	6.71717	5.77906	-0.391206	2.45828	2.3008	0.132925	0.423352
CG12020	0	0	0	0	0	0	0	0	0	0	0	-1.2834	0	1	1
CG12024	82.0513	61.734	78.2189	72.4948	70.0221	76.8017	89.8505	72.1783	71.3054	74.3821	-0.0780851	6.15795	1.14104	0.288382	0.624228
CG12025	189.292	186.367	172.97	180.183	200.679	149.178	187.316	142.457	137.702	170.576	0.238422	7.52963	6.74437	0.0110374	0.0910876
CG12027	0	0	0	0	0	0	0.217556	0	0.258353	0	-2.23851	-1.13404	2.73274	0.103607	0.360393
CG12034	22.695	22.597	24.1812	20.8633	23.8481	24.7328	26.3243	21.7077	20.4099	24.4212	-0.0459871	4.59472	0.137813	0.711366	1
CG12035	0	0	0	0	0	0	0	0	0	0	0	-1.29805	0	1	1
CG12038	36.1624	38.9041	43.4275	33.297	36.2796	47.1224	51.7783	40.9734	35.911	44.5547	-0.23079	5.18618	5.07414	0.0267964	0.157106
CG12042	22.695	25.1595	29.3629	24.0244	25.1166	28.8983	26.9769	27.6774	29.9689	36.1658	-0.247787	4.81574	6.50493	0.0125037	0.0984589
CG12050	19.9517	19.8015	18.9995	20.8633	19.7889	17.9638	19.58	16.2808	12.6593	18.0829	0.229269	4.27887	2.61657	0.109366	0.372579
CG12054	138.664	149.326	140.893	134.663	162.878	140.847	104.427	142.457	144.936	142.24	0.106388	7.22641	1.94887	0.166254	0.488481
CG12056	13.218	16.5401	15.0516	18.7559	16.7444	17.4431	21.3205	16.2808	21.1849	19.015	-0.245392	4.09513	4.16586	0.0442709	0.214245
CG12057	0	0	0	0	0	0	0	0.271347	0	0	-1.51924	0.826683	1.0786	0.302735	0.642213
CG12061	0	0	0	0	0	0.260345	0	0	0	0.186421	-2.2243	-1.18131	3.28808	0.097688	0.346854
CG12065	55.3659	64.2965	70.8165	65.5404	67.2314	74.1983	61.7858	80.59	73.6305	69.3488	-0.151989	5.94661	2.47684	0.119157	0.393589
CG12069	0	0	0	0	0	0	0	0	0	0	0	-1.27714	0	1	1
CG12071	71.3272	87.8254	125.841	96.73	94.1239	115.853	94.4192	130.246	121.426	133.291	-0.322771	6.67601	5.42819	0.022125	0.139444
CG12075	52.6225	52.6486	56.0116	47.8382	57.0833	48.4241	30.4578	35.8178	45.2117	46.7918	0.363948	5.55366	12.6133	0.000620442	0.0134956
CG12078	0	0	0	0	0	0	0	0	0	0	0	-1.26954	0	1	1
CG1208	43.3949	37.2734	26.6487	26.9748	32.7277	21.6086	27.412	21.7077	22.9934	18.2693	0.576007	4.38812	9.14838	0.00327033	0.0397838
CG12081	27.4336	23.7618	28.1292	23.1815	21.5648	26.0345	27.1945	31.4762	26.0936	26.6583	-0.147202	4.6548	2.1617	0.145088	0.448043
CG12082	23.6926	22.364	35.7784	26.5533	25.3703	42.4362	30.4578	35.0037	37.4612	34.6744	-0.426797	4.90229	11.0487	0.00129919	0.0222204
CG12084	95.768	95.0471	100.92	103.474	104.779	102.836	67.6599	92.8006	102.049	106.26	0.0845922	6.57966	1.35225	0.248058	0.567978
CG12090	157.369	171.457	165.567	150.68	163.385	163.497	104.427	167.692	172.838	175.795	0.0441659	7.43769	0.323792	0.570801	0.93716
CG12091	189.79	194.986	197.891	171.754	194.337	238.997	236.048	209.751	196.865	231.349	-0.23083	7.60576	10.9837	0.00134021	0.0225331
CG12093	29.4287	24.2277	30.1032	29.9252	23.8481	29.1586	37.4196	32.0189	25.5769	27.5904	-0.141848	4.87401	2.09812	0.151068	0.458771
CG12096	24.6902	18.6367	20.2333	21.4956	16.4907	22.3897	20.6678	24.9639	21.96	25.1669	-0.181091	4.37147	2.3122	0.131981	0.421066
CG12099	179.814	185.435	212.203	186.927	181.398	216.867	202.544	194.556	207.457	212.52	-0.128691	7.60514	3.41826	0.0678687	0.280653
CG12104	9.47704	10.0172	13.3244	12.8552	13.7	14.0586	20.6678	11.6679	10.3341	12.3038	-0.222101	3.83348	1.76635	0.187302	0.526024
CG12105	4.73852	4.65917	4.6882	4.42556	4.31296	5.72759	3.04578	4.88424	2.58353	3.91485	0.186762	2.40244	0.408656	0.524329	0.903704
CG12106	14.465	13.2786	12.8309	11.8015	13.7	12.7569	15.664	11.3966	11.8842	15.1001	-0.0242704	3.63862	0.0297439	0.863472	1
CG12107	32.4215	29.8187	27.6357	29.7144	22.8333	25.7741	36.7669	34.1897	25.3186	32.0645	-0.115282	4.79313	0.979792	0.32499	0.669388
CG12111	0.498792	0	0	0	0	0	0	0	0	0.186421	0.767828	-0.877672	0.350882	0.555148	0.928004
CG12112	4.23973	5.35805	7.89591	7.58667	6.84999	8.07069	6.09156	3.79886	7.75058	5.77906	0.0241819	2.83742	0.0110453	0.916541	1
CG12115	0.249396	0.232958	0	0	0	0.260345	0.217556	0	0	0	0.0145669	-1.07378	0.000167228	0.989723	1
CG12116	53.1213	124.4	156.685	241.298	102.242	99.1914	187.533	95.2427	104.633	56.1128	0.323418	7.16738	0.877294	0.351532	0.701013
CG12118	58.1092	54.5123	55.0247	52.2637	49.4722	43.7379	55.0416	42.3301	46.7618	42.8769	0.222386	5.38536	4.61516	0.0344641	0.185602
CG12119	42.1479	27.955	23.9345	21.2848	17.7592	27.0759	37.8547	31.2049	14.2094	40.6399	-0.193116	5.13091	0.279408	0.598433	0.963982
CG12121	99.0102	105.763	95.4912	102.841	98.6906	84.3517	111.171	101.212	88.615	96.3799	0.0583898	6.51305	0.834879	0.363386	0.71579
CG12123	10.4746	10.949	11.8439	8.85111	8.87962	7.81035	16.0991	12.7533	8.52564	10.8124	-0.14157	3.39824	0.981166	0.324652	0.668965
CG12125	24.9396	30.0516	26.1552	25.9211	23.5944	22.9103	26.3243	22.7931	26.0936	29.0817	0.0355565	4.73819	0.100092	0.781466	1
CG12126	0	0	0	0	0	0	0	0	0	0	0	-1.30545	0	1	1
CG12128	15.4625	17.4719	15.5451	16.0163	17.2518	19.0052	12.1831	15.7381	15.5012	15.8458	0.0657164	4.20619	0.244209	0.622426	0.986948
CG12129	12.4698	12.1138	14.8048	14.7519	8.87962	12.4966	20.0151	14.3814	16.0179	16.0322	-0.325991	3.95387	4.29196	0.0412483	0.207297
CG1213	306.508	241.578	227.995	272.699	236.452	184.845	164.037	140.829	179.555	157.526	0.636561	7.52475	21.0711	1.47739e-05	0.000984552
CG12133	0	0	0	0	0	0	0	0	0	0	0	-1.2276	0	1	1
CG12134	1.74577	4.42621	4.93495	3.58259	2.79074	6.76897	4.56867	4.6129	5.16706	3.91485	-0.499966	2.53503	3.47447	0.0656886	0.274214
CG12147	0	0	0	0	0.253703	0	0	0	0	0	1.53216	-1.25635	2.03747	0.236514	0.559103
CG12155	21.1987	25.3925	26.8955	31.4004	27.1463	34.8862	30.4578	28.7628	33.3275	28.7089	-0.238313	4.85911	5.70569	0.0190678	0.127121
CG12158	294.038	203.839	298.071	292.508	229.094	263.99	354.398	289.798	221.408	336.304	-0.154629	8.07607	1.03627	0.311507	0.654021
CG12159	25.6878	21.4322	18.9995	17.7022	21.3111	19.2655	27.1945	16.8235	21.4433	18.4557	0.0227061	4.49437	0.0404101	0.9041	1
CG12162	60.8526	52.6486	55.0247	51.6315	47.9499	63.7845	68.5301	67.8367	53.479	63.9425	-0.244826	5.67106	6.4969	0.0125563	0.0986979
CG12163	224.706	237.618	284.5	264.48	228.84	289.243	299.139	287.356	293.23	271.616	-0.215902	8.00131	5.4486	0.0218835	0.138548
CG12164	0	0.232958	0.246747	0	0.253703	0.52069	0.652667	0.271347	0	0.186421	-1.06814	0.686846	1.46693	0.229104	0.559103
CG12170	27.1842	23.5288	23.441	22.1278	22.3259	29.6793	29.8051	27.406	28.9355	26.6583	-0.26446	4.5868	5.24422	0.0244341	0.148352
CG12171	17.2083	12.8127	17.5191	14.7519	15.4759	18.4845	19.58	13.296	18.8598	17.5236	-0.178001	4.07034	1.22883	0.270684	0.59954
CG12173	14.2156	11.6479	15.2983	14.9626	10.9092	14.8397	18.4922	14.3814	15.2428	13.6088	-0.190386	3.91887	1.89057	0.172662	0.499632
CG12177	33.4191	27.955	31.3369	26.9748	23.5944	35.6672	43.076	36.0891	32.2941	37.8435	-0.370438	4.71396	8.10804	0.00549514	0.0563947
CG12179	2.99275	3.26142	4.44145	4.84704	8.37221	4.42586	4.56867	8.1404	5.42541	6.71117	-0.293743	2.80912	1.70685	0.194831	0.538578
CG1218	6.73369	7.22171	7.64917	5.90074	6.84999	7.55	9.3549	12.482	8.26729	10.8124	-0.49897	3.17584	5.27134	0.0240783	0.147206
CG12182	17.4577	21.1992	17.5191	12.8552	15.9833	14.5793	15.4465	14.11	13.951	14.9137	0.216092	3.89928	2.79391	0.0982093	0.347966
CG12184	0	0	0.246747	0	0	0.260345	0.217556	0	0	0.186421	-1.17009	-0.887792	1.14459	0.313253	0.654352
CG12194	145.148	122.536	96.2315	102.209	106.048	91.3811	102.686	102.569	82.1562	116.327	0.206783	6.65929	4.8672	0.0300014	0.169138
CG12200	0	0	0	0.210741	0	0	0	0	0	0	1.51483	-1.01058	1.60738	0.236514	0.559103
CG12203	148.889	107.161	141.633	129.816	120.255	149.178	176.22	133.503	124.526	149.696	-0.17961	6.92512	2.69385	0.10434	0.362093
CG12204	1.49638	1.16479	2.71422	5.69	2.28333	6.76897	5.65645	4.34155	4.392	4.28769	-0.897642	2.22231	6.50005	0.0125356	0.0985819
CG12206	0.249396	0.465917	0.986989	0.210741	0.253703	1.04138	0.435112	0.542694	0.516706	0.186421	-0.274455	0.60611	0.202972	0.678661	1
CG12207	95.5186	91.5527	86.1148	88.9326	98.6906	89.819	102.034	89.8158	86.5482	95.0749	-0.00873908	6.58759	0.0198743	0.888214	1
CG12209	0	0	0.246747	0	0	0	0	0.542694	0.258353	0.559264	-2.05213	-0.951016	3.67317	0.0585714	0.255101
CG12213	52.8719	70.5864	78.7124	70.1767	70.0221	80.7069	76.1445	79.2333	84.9981	85.9403	-0.249435	6.2462	8.75102	0.00398241	0.0453132
CG12219	13.218	13.0457	12.3374	12.0122	15.9833	21.0879	14.7938	16.0095	20.1515	17.1508	-0.419986	3.94798	7.85145	0.00625586	0.061427
CG12224	5.23731	8.15355	8.14266	10.7478	7.3574	6.76897	9.3549	5.15559	5.42541	4.66054	0.3419	2.92525	1.55407	0.215875	0.559103
CG12229	0	0.232958	0	0	0	0.52069	0	0	0	0	-0.729704	-0.941001	0.31362	0.576973	0.942817
CG12231	0	0	0	0.210741	0	0	0	0	0	0.372843	-0.679635	-1.20714	0.290492	0.592955	0.95847
CG12236	35.1648	42.8644	44.6613	43.6233	49.2185	42.1759	33.5036	44.2295	58.9044	49.4017	-0.0816247	5.47183	0.624336	0.431585	0.796285
CG12237	72.3248	68.4898	65.8815	62.1685	63.1721	75.2397	82.6712	78.1479	75.9557	82.5847	-0.24998	6.13705	11.3366	0.00113248	0.0203011
CG12239	163.105	196.151	409.847	252.257	205.5	473.307	313.28	454.777	470.46	523.285	-0.86529	8.52481	8.81495	0.00385779	0.0444724
CG12241	36.1624	28.6539	32.0772	33.5078	31.7129	33.5845	30.2403	29.0341	38.4946	32.8102	-0.0177748	5.08259	0.0377762	0.846345	1
CG12253	16.9589	10.7161	12.8309	9.06185	12.9389	11.4552	14.5762	10.8539	12.4009	14.9137	-0.0510803	3.61126	0.104994	0.746693	1
CG12256	1.74577	2.56254	2.71422	2.31815	2.02963	3.64483	2.82823	2.71347	0.775058	2.23706	-0.0965093	2.02262	0.05587	0.813701	1
CG12259	4.23973	4.42621	9.12965	6.32222	6.84999	8.07069	6.74423	10.3112	7.23388	8.57538	-0.399802	2.91993	2.99438	0.0870923	0.332373
CG12262	103.749	107.161	94.9977	95.0441	92.348	112.469	126.617	106.097	92.2319	79.2291	-0.0657792	6.99319	0.105122	0.746544	1
CG12263	42.6467	35.6426	27.6357	32.0326	30.6981	26.8155	28.7174	28.7628	34.3609	22.1841	0.263614	4.85497	5.11617	0.026191	0.154804
CG12264	50.378	51.4838	56.5051	56.9	49.9796	57.7966	77.6674	53.184	53.2207	64.5018	-0.209974	5.68563	5.51989	0.0210612	0.135185
CG12267	6.48429	6.7558	4.44145	7.58667	5.58147	6.24828	10.2251	8.6831	6.71717	5.77906	-0.279079	2.90103	2.08836	0.152011	0.460534
CG12268	5.73611	4.19325	7.89591	6.53296	5.07407	4.42586	4.35112	2.98482	8.00894	5.03338	0.245707	2.78874	0.923232	0.339285	0.687323
CG12269	53.3707	59.8703	76.4917	67.8585	50.7407	64.5655	115.74	88.7304	65.3632	89.6687	-0.461219	6.07295	11.0793	0.00128032	0.021965
CG1227	8.23007	8.38651	8.8829	10.3263	10.1481	12.4966	16.3167	13.0246	7.49223	11.1853	-0.397062	3.45997	4.52938	0.03614	0.191726
CG12272	39.654	36.3415	40.2198	40.2515	37.2944	35.6672	34.1563	40.4307	34.8776	36.9114	0.09076	5.18319	0.959725	0.329967	0.676189
CG12278	0	0	0.246747	0.842963	0.507407	0.781035	0.652667	0.271347	0	0.559264	-0.463494	-0.556099	0.360068	0.550025	0.924495
CG12279	7.98067	10.4831	9.12965	8.21889	8.62591	12.7569	16.0991	11.9393	9.3007	10.9989	-0.460208	3.44521	9.83322	0.00233665	0.031725
CG12288	1.24698	1.16479	1.48048	3.37185	1.01481	2.3431	2.82823	1.62808	2.84188	2.05064	-0.46904	1.28117	1.15796	0.284858	0.619769
CG12289	0	0	0	0	0	0	0	0	0	0	0	-1.30545	0	1	1
CG12290	48.8816	51.2509	47.1287	42.9911	52.7703	46.081	27.412	40.1593	41.3364	36.9114	0.343347	5.57521	9.85015	0.00231743	0.0315665
CG12299	30.1769	31.2164	48.3625	39.1978	38.5629	49.2052	34.5914	40.4307	47.0202	48.4696	-0.228496	5.3565	3.37654	0.0695374	0.285576
CG12301	2.49396	3.96029	6.41543	6.7437	5.58147	9.11207	6.52667	8.1404	9.8174	7.45686	-0.688103	3.22453	7.21298	0.00866451	0.0769683
CG12304	29.4287	31.4494	29.1162	33.5078	34.5037	29.1586	43.076	29.3055	32.2941	33.5559	-0.0860293	4.98934	0.822405	0.366978	0.719376
CG12307	0	0	0	0	0	0	0	0.271347	0	0	-1.52674	-1.28329	1.69468	0.241564	0.559103
CG12309	0	0	0	0	0	0	0	0	0	0	0	-1.24038	0	1	1
CG1231	6.48429	2.7955	7.64917	5.90074	4.56666	5.98793	7.61445	9.22579	6.45882	8.57538	-0.470209	2.81691	5.77951	0.0183318	0.123993
CG12310	0	24.4606	0	16.227	4.05925	1.56207	0	0	4.13364	0	3.01824	0.284939	5.32696	0.025853	0.153896
CG12316	19.9517	28.8869	30.1032	28.6607	30.1907	38.7914	23.7136	30.1195	41.0781	41.1991	-0.343492	4.98621	5.58323	0.020358	0.13245
CG12320	7.23248	7.68763	6.16868	9.90482	7.6111	7.02931	9.57246	8.1404	8.52564	9.32107	-0.141948	2.91774	0.604352	0.439027	0.805661
CG12321	13.218	13.5116	13.8179	12.4337	11.1629	14.8397	19.7976	13.296	15.2428	16.5915	-0.318757	3.71864	3.97994	0.0491687	0.228158
CG12325	13.9662	13.2786	10.1166	11.5907	13.1926	12.7569	12.1831	13.8387	15.2428	11.1853	-0.0646804	3.76814	0.198126	0.665578	1
CG1233	33.9178	37.7393	42.4405	43.8341	32.474	41.1345	33.0685	37.4459	38.4946	36.1658	0.0344824	5.3005	0.170731	0.680477	1
CG12333	61.8502	61.501	62.9206	58.5859	64.4407	65.0862	73.0988	64.8519	67.9468	71.7722	-0.149516	5.87062	2.49641	0.117728	0.390722
CG12338	42.3973	33.3131	34.2979	42.7804	32.2203	40.6138	47.4272	35.8178	29.9689	31.5052	-0.00152328	5.39873	8.10695e-05	0.992837	1
CG1234	10.9734	10.2502	12.3374	16.0163	14.4611	11.9759	10.4427	14.9241	14.4678	10.4396	0.0517089	3.8029	0.0945912	0.759153	1
CG12341	25.189	18.8696	19.7398	18.3344	16.9981	15.1	24.5838	16.8235	15.2428	18.8286	0.122852	4.18665	0.934549	0.336358	0.683396
CG12343	17.4577	16.773	20.7268	16.0163	19.2815	17.4431	33.286	24.4212	19.3765	23.8619	-0.397638	4.38142	8.65452	0.0041785	0.0468143
CG12344	18.9541	17.4719	11.3504	17.7022	15.4759	14.319	17.4045	9.76849	10.3341	13.6088	0.300247	4.04125	1.9105	0.170439	0.49593
CG12347	0	0	0	0	0	0	0	0	0	0	0	-1.28385	0	1	1
CG12355	84.2958	68.9557	40.4666	57.9537	62.6647	37.75	63.9614	52.3699	51.4122	53.6894	0.275561	5.65567	3.49558	0.0648899	0.272033
CG1236	14.465	14.2105	14.3113	17.4915	12.9389	16.9224	21.3205	12.2106	15.5012	14.168	-0.125772	4.02841	0.821983	0.3671	0.719448
CG12360	78.3103	74.0808	75.5047	84.0856	88.7962	66.3879	65.0492	61.3244	82.6729	65.4339	0.234049	6.27453	12.7279	0.000588138	0.0130102
CG12362	0.498792	0.232958	0	0	0	0	0	0.271347	0	0	1.21181	-0.819014	1.01625	0.3162	0.657612
CG12374	0.249396	0	0	0.210741	0	0	0	53.184	0	0.186421	-6.39619	4.01347	10.9087	0.00146704	0.0239875
CG12375	24.4408	23.0629	19.493	24.6567	26.6389	23.431	34.1563	24.4212	25.3186	23.4891	-0.146561	4.63608	1.47248	0.228232	0.559103
CG12376	0	0	0	0	0	0	0	0	0	0	0	-1.24852	0	1	1
CG12379	1.74577	2.09663	3.70121	2.52889	2.02963	3.64483	3.26334	0.81404	3.10023	3.16916	-0.219722	1.65678	0.543938	0.462786	0.835242
CG12384	73.8212	67.092	63.6608	57.3215	49.9796	58.5776	89.1979	68.9221	47.7953	59.8413	-0.0580627	5.91714	0.313692	0.57686	0.942817
CG1239	5.23731	4.65917	4.44145	3.79333	2.53703	8.59138	8.04956	6.24098	3.87529	4.66054	-0.596808	2.56457	5.13278	0.0259558	0.153906
CG12391	15.9613	17.2389	29.8564	21.0741	13.9537	31.2414	30.6754	36.9032	31.7774	37.6571	-0.777502	4.84019	12.5492	0.000639285	0.0138335
CG12393	25.189	28.4209	31.8304	29.9252	26.8926	32.5431	39.16	30.6622	29.9689	26.4718	-0.157358	4.82486	1.54331	0.217457	0.559103
CG12395	0	0.232958	0	0	0	0	0	0	0	0	1.5243	-1.26917	1.77665	0.236514	0.559103
CG12398	0	0	0	0	0	0	0	0.271347	0.516706	0	-2.74394	-1.11011	4.76032	0.0425212	0.209883
CG12400	153.877	112.519	139.165	124.126	111.883	126.788	189.274	131.875	111.608	148.578	-0.144057	6.91478	1.85407	0.17682	0.506978
CG12402	36.6612	31.9153	32.0772	33.297	40.8462	30.4604	35.0265	31.2049	26.6103	30.946	0.177818	5.11907	2.70608	0.103568	0.360393
CG12404	42.1479	40.5348	31.8304	40.2515	41.0999	33.0638	40.6829	31.2049	32.0357	30.7595	0.222784	5.08198	4.96434	0.028449	0.163248
CG12413	8.47946	4.89213	11.1036	11.8015	8.87962	10.1535	8.26712	12.2106	9.55905	13.6088	-0.253208	3.39891	1.88821	0.172926	0.500007
CG12420	0	0	0.246747	0.210741	0.253703	0.260345	0.217556	0	0.516706	0.186421	-0.632374	-0.346332	0.531645	0.490249	0.865935
CG12426	0.249396	0.232958	0	0	0.253703	0	0.217556	0.271347	0.516706	0	-0.357233	-1.05818	0.125936	0.723796	1
CG12428	14.7144	21.1992	20.2333	17.7022	17.7592	15.881	19.3625	20.6224	18.6014	18.4557	-0.0199756	4.87943	0.010517	0.918554	1
CG12438	0	0	0	0	0	0	0	0	0	0	0	-1.26934	0	1	1
CG12439	0	0	0	0	0	0	0	0	0	0	0	-1.29814	0	1	1
CG12446	0	0	0	0	0	0	0	0	0	0	0	-1.2484	0	1	1
CG12448	0.249396	0	0	0	0.253703	0	0	0	0.258353	0	0.73869	-0.851837	0.330775	0.566756	0.93523
CG1246	0.997584	0.465917	0.740242	0.632222	0	0.52069	0.217556	1.35673	0.258353	0.186421	0.230526	0.163108	0.0828751	0.774122	1
CG12464	0	0	0	0	0	0	0	0	0	0	0	-1.30545	0	1	1
CG12470	0.498792	0.232958	0.246747	0.632222	0.507407	1.04138	1.30533	1.89943	1.03341	1.30495	-1.56733	0.646943	9.45231	0.00281564	0.0360898
CG12477	0	0	0	0	0	0	0	0	0	0	0	-1.22648	0	1	1
CG12479	0	0	0	0	0	0	0	0	0	0	0	-1.29133	0	1	1
CG12480	0.249396	0	0	0	0	0	0	0	0	0	1.53055	-1.16784	1.63462	0.236514	0.559103
CG12481	0	0	0	0	0	0	0	0	0	0	0	-1.30545	0	1	1
CG12483	3.24215	2.56254	2.46747	1.26444	3.80555	2.3431	2.82823	2.17077	2.06682	0.745686	0.397666	1.29718	0.888264	0.348553	0.697632
CG12484	134.175	151.889	145.828	145.833	143.089	156.207	100.511	164.436	132.535	157.899	0.0191881	6.98961	0.0723721	0.788549	1
CG12490	0	0	0	0	0	0	0	0	0	0	0	-1.07803	0	1	1
CG12491	0	0	0	0	0	0	0	0	0	0	0	-1.30545	0	1	1
CG12493	0	0.931834	0	0.210741	0	0.260345	0	0.271347	0	0.372843	0.306358	-0.747851	0.0852345	0.771019	1
CG12496	0	0	0	0	0	0	0	0	0	0	0	-1.24806	0	1	1
CG12498	0	0	0	0	0	0	0	0.271347	0	0	-1.52664	-1.23493	1.57481	0.241564	0.559103
CG12499	18.2059	19.1026	16.0386	22.1278	14.9685	15.881	11.3129	15.7381	19.3765	14.7273	0.239991	4.27434	1.7035	0.195265	0.539332
CG12502	103.749	108.326	106.842	102.631	111.883	105.96	79.6254	125.362	108.25	121.174	-0.0183948	6.75538	0.0580672	0.810143	1
CG12506	0.249396	171.224	0	15.1733	0.76111	3.38448	0	0	0.516706	0	5.65046	1.63259	11.5123	0.00159309	0.0249766
CG12507	0.997584	0.232958	0.246747	0	0.253703	0.260345	0.435112	0.542694	0.516706	0	0.00553483	-0.593637	6.02157e-05	0.993826	1
CG12511	0	0	0	0	0	0	0	0	0	0	0	-1.28365	0	1	1
CG12512	48.6322	43.7962	51.3234	55.6356	48.4573	52.85	52.8661	50.7419	43.92	46.0461	0.0093017	5.51549	0.00661619	0.935358	1
CG12516	0	0	0	0	0	0	0	0	0	0	0	-1.29089	0	1	1
CG12517	0	0	0	0.210741	0	0	0	0	0	0	1.51483	-1.00964	1.35654	0.248813	0.568633
CG12519	0.249396	0	0	0	0	0	0.217556	0	0	0.186421	-0.678423	-1.17899	0.314339	0.577476	0.943213
CG12520	0.997584	1.63071	2.96097	0.842963	1.01481	0.260345	0.870223	1.08539	1.29176	0.745686	0.79102	0.379263	2.79642	0.0980604	0.347586
CG12521	0	0.232958	0.246747	0.210741	0	0	0	0.271347	0.516706	0	-0.0206487	-1.0586	0.000248415	0.987467	1
CG12522	0.249396	0	0.493495	0.632222	0.507407	0	1.52289	0.271347	0	0.745686	-0.487737	-0.083964	0.386671	0.536292	0.915646
CG12523	0	0	0	0	0	0.52069	0	0	0	0	-2.2549	-1.23487	3.16117	0.097688	0.346854
CG12531	271.093	277.687	205.541	217.695	255.479	181.46	138.801	221.962	207.974	225.57	0.331061	7.96295	8.98174	0.00355134	0.04213
CG12535	0.249396	0	0	0.210741	0	0	0.217556	0	0.258353	0.186421	-0.454225	-0.84726	0.173005	0.678526	1
CG12538	0	0	0	0	0	0	0	0	0	0	0	-1.29828	0	1	1
CG12539	0	0	0.493495	0	0	0	0	0	0	0	2.25766	-1.06429	2.45243	0.122042	0.399881
CG12540	0	0	0	0	0	0	0	0	0	0	0	-1.2495	0	1	1
CG12541	42.1479	43.0973	33.5576	33.297	41.8611	34.1052	43.9463	32.833	28.6772	37.0979	0.130222	5.32239	1.10219	0.296687	0.635546
CG12546	0	0	0	0	0	0	0	0	0	0	0	-1.30545	0	1	1
CG12547	164.601	150.025	101.413	117.804	143.089	93.4638	126.617	100.127	89.3901	89.8551	0.437809	6.85636	10.9072	0.00139024	0.0230472
CG12560	13.9662	11.182	9.3764	10.7478	14.9685	8.85173	15.2289	11.9393	6.20047	8.01612	0.256974	3.60512	1.76542	0.187418	0.526084
CG12567	109.485	91.5527	65.6348	80.2922	103.511	50.7673	67.6599	64.8519	52.1873	52.9437	0.642517	6.30905	17.0533	8.30541e-05	0.00336379
CG12576	142.654	130.69	108.816	109.796	131.926	89.0379	99.6406	88.4591	97.399	104.396	0.379889	6.89955	23.168	6.1857e-06	0.00056637
CG12581	117.964	98.0755	102.4	103.052	110.868	92.4224	78.1025	93.886	94.0404	94.3292	0.233609	6.76455	8.15136	0.00537651	0.0555827
CG12582	68.3345	63.5977	66.6218	72.9163	65.4555	63.7845	66.137	66.2086	70.5303	56.1128	0.0636714	6.11199	0.508043	0.477891	0.852791
CG12589	0	0	0	0	0	0	0	0.271347	0.258353	0	-2.25744	-1.18775	3.21118	0.097688	0.346854
CG12590	2.74336	1.63071	0.740242	1.26444	1.01481	2.08276	0.435112	1.35673	1.55012	0.932107	0.241096	0.528099	0.265684	0.607547	0.972854
CG12592	0	0	0	0	0	0	0	0	0	0	0	-0.938341	0	1	1
CG12594	52.3731	55.4441	44.908	49.9456	52.0092	48.4241	41.118	51.8272	39.2696	48.8424	0.150532	5.55105	3.75336	0.0559393	0.247212
CG12605	155.872	188.696	144.347	190.931	229.348	149.438	112.476	160.909	179.297	177.846	0.221316	7.54733	4.29791	0.0411112	0.206879
CG12607	0	0	0	0	0	0	0	0	0	0	0	-1.13745	0	1	1
CG12608	14.7144	17.9378	22.2073	22.9707	16.4907	27.0759	31.328	25.7779	19.1181	22.9298	-0.417722	4.39446	8.27625	0.00504922	0.0533581
CG12609	0	0	0	0.210741	0	0	0	0	0	0	1.51457	-1.173	1.51614	0.236514	0.559103
CG12617	0	0	0	0	0	0	0	0	0	0	0	-0.984795	0	1	1
CG12620	0	0	0	0	0	0	0	0	0	0	0	-1.29802	0	1	1
CG12637	0	0	0	0	0	0	0	0	0	0	0	-1.27062	0	1	1
CG12640	0	0	0.246747	0	0	0	0	0	0.258353	0.186421	-0.694319	-1.0568	0.314224	0.576682	0.942722
CG12643	2.49396	3.49438	4.1947	5.47926	3.04444	2.86379	5.87401	1.89943	2.06682	2.23706	0.316986	2.72142	0.842311	0.361269	0.713284
CG12645	0	0	0	0	0	0	0	0	0	0	0	-1.09544	0	1	1
CG1265	58.1092	42.1655	43.4275	34.983	35.7722	38.0104	55.6943	39.6166	39.0113	37.8435	0.0262832	5.26507	0.0428616	0.836469	1
CG12655	5.73611	6.28988	5.18169	2.73963	5.07407	5.2069	6.30912	3.52751	6.97552	5.59264	-0.15582	3.01251	0.395294	0.531174	0.910996
CG12659	5.48671	2.32958	2.71422	2.10741	3.29814	1.56207	2.82823	1.62808	2.32517	1.30495	0.709688	1.68953	5.03899	0.0273141	0.159074
CG12661	0	0	0	0	0	0	0	0	0	0	0	-1.27674	0	1	1
CG12662	0	0	0	0	0	0	0	0	0.258353	0	-1.52251	-1.26239	1.90395	0.241564	0.559103
CG12672	0.748188	2.09663	1.72723	1.26444	1.52222	1.30172	1.958	2.17077	2.06682	2.79632	-0.492145	1.57464	1.89588	0.172067	0.498296
CG12674	0	0	0	0.210741	0	0	0	0	0	0	1.51437	-1.27761	1.98127	0.236514	0.559103
CG12679	0	0	0	0	0	0	0	0	0	0	0	-1.30545	0	1	1
CG12680	0.249396	0	0	0	0.253703	0	0	0	0	0	2.26114	-1.24823	3.6056	0.0941171	0.34456
CG12681	0	0.232958	0.246747	0.210741	0	0.781035	0	0	0.516706	0	-0.677513	-0.955143	0.352904	0.554357	0.927302
CG12682	0	0	0	0	0	0	0	0	0	0	0	-1.22849	0	1	1
CG12684	0	0	0	0	0	0.260345	0	0	0	0	-1.52313	-1.23676	1.76204	0.241564	0.559103
CG12688	0	0.465917	0	0	0.507407	0.260345	0.217556	0.271347	0	0.186421	0.0271652	-0.862322	0.000763723	0.983184	1
CG12689	0	0	0.246747	0	0	0	0.435112	0.271347	0	0.186421	-1.52823	-0.886428	1.73828	0.19081	0.531769
CG12691	0	0	0	0	0	0	0	0	0	0	0	-1.30545	0	1	1
CG12692	0	0	0	0	0	0	0	0	0	0	0	-1.29072	0	1	1
CG12693	0	0	0	0	0.253703	0	0	0	0.258353	0	0.00980602	-1.03137	7.57274e-05	0.993079	1
CG12698	0	0.232958	0	0.210741	0.253703	0.52069	0	0	0	0.372843	-0.330148	-1.02949	0.116281	0.734168	1
CG12699	0	0	0	0	0	0	0	0	0	0	0	-1.23213	0	1	1
CG12702	0	0.232958	0.246747	0.421482	0	0	0.217556	0	0.775058	0.186421	-0.283926	-0.0853266	0.0789612	0.779376	1
CG12708	0	0	0	0.210741	0	0	0.217556	0.542694	0	0	-1.2136	-0.43545	0.834483	0.364064	0.716334
CG1271	20.2011	23.7618	25.1682	22.3385	16.9981	26.8155	29.1525	26.3206	28.4188	20.3199	-0.26791	4.47957	4.81135	0.0309344	0.17231
CG12713	1.99517	3.26142	1.97398	2.31815	2.53703	4.68621	2.61067	2.44212	2.58353	3.72843	-0.407067	1.67398	2.06411	0.154383	0.465142
CG12715	0	0	0	0	0	0	0	0	0.258353	0	-1.52231	-1.1543	1.48513	0.241564	0.559103
CG12716	0.748188	0.931834	0.986989	0.421482	0.253703	1.30172	1.08778	1.08539	0.516706	0.745686	-0.480784	2.05259	0.906323	0.343724	0.693042
CG12717	15.7119	17.006	15.2983	21.917	10.6555	15.3603	11.9656	20.0797	18.6014	18.4557	-0.0592277	4.23802	0.139186	0.712739	1
CG12721	0	0.232958	0	0.421482	0	0.52069	0	0	0	0	0.463392	-0.231704	0.112343	0.738426	1
CG12723	0	0	0.246747	0	0	0.260345	0.217556	0	0.258353	0	-1.19708	-0.969256	0.931323	0.337614	0.685015
CG12725	0	0	0	0.210741	0	0.52069	0	0	0.258353	0	-1.22754	-1.24748	1.1361	0.313253	0.654352
CG12728	14.2156	18.1708	11.8439	11.1693	9.89443	9.11207	17.8396	8.95445	7.75058	9.69391	0.281568	3.68123	2.78932	0.0984816	0.348365
CG12729	0	0	0	0	0	0	0	0	0	0	0	-1.29111	0	1	1
CG1273	0.249396	0.931834	0	0	0	0	0	0	0	0	3.37713	-0.696323	6.05112	0.0159686	0.114539
CG12730	57.6105	47.2906	34.0511	47.2059	37.5481	41.3948	48.0798	39.0739	40.8197	37.6571	0.112224	5.32781	0.939119	0.335186	0.681825
CG12736	41.1503	43.7962	44.6613	38.7763	36.5333	38.531	55.6943	39.6166	37.7195	44.5547	-0.0797867	5.04449	0.62521	0.431264	0.796096
CG12744	1.74577	2.7955	2.96097	1.68593	1.77592	2.60345	2.61067	1.08539	2.06682	2.42348	0.00784792	1.30819	0.000400205	0.984085	1
CG12746	58.8574	54.9782	67.362	47.6274	59.3666	53.8914	66.7896	50.7419	48.312	54.4351	0.0690775	5.71474	0.667083	0.416297	0.779362
CG1275	233.684	198.947	165.814	173.44	170.489	166.1	197.106	178.546	157.854	161.255	0.130312	7.40053	2.12654	0.148361	0.453928
CG12766	1.74577	2.09663	2.46747	1.89667	1.52222	1.82241	4.56867	3.52751	1.03341	1.86421	-0.395817	1.31608	1.07179	0.303405	0.642983
CG12768	20.2011	20.7333	16.0386	16.227	19.5352	20.0466	21.9731	23.8785	23.7685	27.4039	-0.339802	4.32939	7.56194	0.00724745	0.067953
CG12769	71.5766	71.9842	56.7519	59.2182	68.7536	57.2759	51.3432	62.1384	60.4545	62.0783	0.162374	5.99418	2.61874	0.109221	0.372433
CG12772	24.4408	33.546	30.3499	29.9252	32.2203	38.2707	26.9769	34.461	39.528	35.0472	-0.209252	4.97713	4.83478	0.0305392	0.171304
CG12773	41.3997	42.8644	33.5576	38.5656	38.8166	37.2293	28.4998	29.8482	42.6282	38.03	0.147594	5.3027	1.68385	0.197837	0.543923
CG12780	0	0	0	0	0	0	0	0.271347	0	0	-1.52607	-0.973315	0.910684	0.345246	0.694853
CG12782	0	0	0	0	0	0	0	0	0	0	0	-1.30545	0	1	1
CG12783	0	0	0.246747	0	0.253703	0.260345	0	0	0.516706	0.745686	-1.51376	-0.39427	2.95129	0.0903618	0.341578
CG12784	0	0	0	0	0	0	0	0	0	0	0	-1.30545	0	1	1
CG12788	0	0	0	0	0	0	0	0	0	0	0	-1.30545	0	1	1
CG12795	19.2035	21.6651	24.1812	22.76	25.624	19.5259	23.496	20.0797	22.735	24.6076	0.0345696	4.38094	0.0665324	0.817957	1
CG12796	0	0	0.246747	0	0.253703	0	0	0	0	0	2.26006	-1.14165	3.0242	0.0941171	0.34456
CG12811	10.724	17.4719	13.5711	16.8593	13.4463	10.6741	21.538	18.1802	16.7929	13.6088	-0.160935	4.03726	0.814159	0.36938	0.722306
CG12814	76.0658	74.5467	60.6998	72.7056	81.1851	53.8914	63.3087	56.9828	63.5548	51.0795	0.339053	6.1415	10.3726	0.00179819	0.0269848
CG12817	16.2107	17.2389	14.0646	14.3304	15.9833	16.1414	19.7976	15.7381	12.9176	13.7952	-0.011642	4.49268	0.00869693	0.925913	1
CG12818	2.24456	4.89213	6.90893	3.16111	4.82036	5.2069	8.70223	7.32636	5.42541	5.2198	-0.535407	2.49872	3.08217	0.0826673	0.321277
CG12822	40.6515	37.7393	41.4536	39.4085	39.0703	57.0155	48.9501	47.2143	37.2028	44.7411	-0.245164	5.34887	8.1079	0.00549551	0.0563947
CG12824	0	0.232958	0	0.210741	0	0	0.435112	0.271347	0	0.186421	-0.818654	-0.590414	0.536296	0.465936	0.838592
CG12825	4.48913	5.12509	3.20772	0.632222	2.79074	1.30172	2.61067	1.35673	1.29176	1.86421	0.902119	1.77443	6.14771	0.0150822	0.110746
CG12826	0.249396	0.232958	0.246747	0	0	0	0.435112	0	0	0.186421	0.0509276	-0.76485	0.00173088	0.966914	1
CG12828	0.249396	0.232958	0	0	0	0	0	0.271347	0	0	0.727167	-1.19932	0.363817	0.55137	0.924495
CG12831	0	0	0	0	0	0	0	0	0	0.186421	-1.49051	-1.20611	1.7347	0.241564	0.559103
CG12836	1.74577	0.931834	1.97398	0.842963	1.77592	1.04138	1.30533	0.81404	0.775058	1.49137	0.376211	0.544089	0.580495	0.448175	0.816537
CG12848	10.4746	10.2502	16.2853	10.537	8.11851	20.8276	22.8434	18.7229	19.6348	17.5236	-0.83705	3.86631	32.4705	1.61433e-07	3.10377e-05
CG12849	0	0	0	0	0	0	0	0	0	0	0	-1.2908	0	1	1
CG12851	62.349	90.6209	73.5307	66.5941	88.5425	68.9914	58.5225	62.1384	75.1807	71.7722	0.180643	6.19339	4.30733	0.0408953	0.206103
CG12853	0	0	0	0	0	0	0.435112	0	0	0	-2.22395	-1.02952	3.21657	0.097688	0.346854
CG12857	1.49638	1.39775	0.986989	0.842963	0.76111	0.52069	1.30533	1.62808	0.775058	1.67779	-0.125685	0.350386	0.0799724	0.778005	1
CG12858	391.302	412.104	343.719	349.408	374.72	337.407	250.189	338.369	342.576	362.03	0.198652	8.51991	5.84851	0.0176709	0.121589
CG12859	96.7656	67.325	83.6473	65.9619	63.6795	79.9259	117.045	78.1479	68.9802	90.4144	-0.206399	6.16417	2.98567	0.0875456	0.333571
CG12860	0	0	0	0	0	0	0	0	0	0	0	-1.22343	0	1	1
CG12861	0	0	0	0	0	0	0	0	0	0	0	-1.29807	0	1	1
CG12862	0	0	0	0	0	0	0	0	0	0.186421	-1.49026	-1.27716	1.97077	0.241564	0.559103
CG12863	4.23973	7.68763	7.15567	6.95445	6.08888	6.50862	6.74423	7.05502	8.00894	7.8297	-0.167891	2.83231	0.747363	0.389685	0.747101
CG12866	0	0	0	0	0	0	0	0	0	0	0	-1.27693	0	1	1
CG12868	16.2107	16.3071	12.5841	15.5948	12.9389	9.37242	16.0991	11.3966	10.5925	11.3717	0.319242	3.69989	3.61365	0.0606113	0.260763
CG12869	2.74336	1.63071	1.48048	0.632222	1.52222	1.30172	1.30533	1.35673	1.80847	1.67779	0.0850328	0.956804	0.0573998	0.853921	1
CG1287	0.498792	0	0	0.210741	0.507407	0.52069	0	0.542694	1.03341	0	-0.653563	-0.51765	0.50938	0.477314	0.852175
CG12877	18.2059	14.6764	26.8955	15.8056	22.5796	27.5966	19.7976	21.9791	22.9934	25.3533	-0.265464	4.49029	2.52983	0.115333	0.385525
CG1288	0	0	0	0	0	0	0	0	0	0	0	-1.29066	0	1	1
CG12880	2.74336	2.32958	1.97398	2.52889	2.02963	2.86379	1.958	1.62808	1.55012	2.05064	0.206057	1.36513	0.39722	0.530177	0.90966
CG12883	5.23731	3.72734	5.18169	6.11148	5.58147	5.72759	6.09156	4.6129	4.13364	5.2198	-0.000458544	2.44264	3.93784e-06	0.998421	1
CG12885	1.49638	2.32958	3.70121	1.0537	1.26852	2.60345	2.17556	2.44212	2.58353	2.98274	-0.383196	1.28155	1.0089	0.317947	0.659675
CG12895	37.9082	32.1483	31.8304	27.1856	28.6685	29.419	41.3356	28.4914	23.5101	29.4546	0.0471615	4.68665	0.162494	0.703407	1
CG12896	2.74336	0.931834	2.46747	2.10741	2.53703	2.3431	3.69845	1.89943	1.80847	1.49137	-0.0659957	1.29917	0.0248668	0.875064	1
CG12898	0	0	0	0	0	0	0	0	0	0	0	-1.20839	0	1	1
CG12902	0	0	0	0	0	0	0	0	0	0	0	-1.30545	0	1	1
CG12907	0	0	0	0	0	0	0	0	0	0	0	-1.30545	0	1	1
CG12909	0.997584	2.32958	2.71422	1.47519	2.53703	4.42586	3.916	3.25616	2.84188	2.6099	-0.754015	1.97551	4.27036	0.04175	0.208837
CG1291	15.4625	17.7048	23.6877	23.1815	22.0722	20.8276	22.1907	20.8937	24.0268	19.5742	-0.0718892	4.19737	0.304793	0.582306	0.948138
CG12910	8.72886	9.08538	9.12965	9.06185	9.64073	12.7569	12.4007	10.5825	12.1426	16.4051	-0.501925	4.01145	13.4527	0.000420278	0.0104925
CG12911	0.498792	0.232958	0.246747	0.632222	0.76111	0.260345	0.217556	0.542694	0.775058	0.745686	-0.103467	-0.0961456	0.0245813	0.875777	1
CG12912	0	0	0	0	0	0	0	0	0	0	0	-1.30545	0	1	1
CG12913	26.6854	32.8471	28.8694	27.8178	30.6981	28.6379	30.2403	29.0341	31.519	33.5559	-0.060277	4.74976	0.386494	0.53577	0.915407
CG12914	0	0	0	0	0	0	0	0	0	0	0	-1.25519	0	1	1
CG12917	0	0	0	0	0	0	0	0	0	0	0	-0.990932	0	1	1
CG12920	0	0	0	0	0.253703	0	0	0	0	0.186421	0.041501	-1.18697	0.000767277	0.991591	1
CG12923	0.498792	0.698875	0.493495	0.632222	0	0.52069	0.435112	0.271347	0	0.186421	0.694435	-0.325357	1.00202	0.319592	0.661979
CG12926	20.2011	21.1992	26.6487	24.2352	18.2666	28.8983	41.7707	31.7476	25.8353	34.1151	-0.556177	4.37645	19.4406	2.94853e-05	0.0016013
CG12929	4.23973	4.19325	4.6882	3.79333	3.55185	1.82241	6.30912	4.34155	4.65035	3.91485	-0.0481445	2.10552	0.0414039	0.839234	1
CG12934	0	0.232958	0.493495	0.421482	0.253703	0.260345	0.435112	0.271347	0.258353	0.559264	-0.348724	-0.656807	0.14784	0.701545	1
CG12935	8.23007	7.92059	6.90893	8.42963	6.59629	3.90517	10.2251	7.05502	7.49223	5.96549	0.13407	2.84676	0.45671	0.500954	0.876788
CG12942	7.23248	6.7558	6.90893	6.32222	5.07407	10.4138	8.48468	6.51232	10.3341	8.76181	-0.460651	3.09117	4.49057	0.0369266	0.194665
CG12945	47.1358	44.961	31.5837	39.83	43.637	33.8448	44.5989	34.461	35.6527	36.9114	0.157105	5.34478	1.90034	0.171568	0.497628
CG12947	5.73611	4.65917	2.22073	6.11148	4.05925	2.86379	3.26334	4.0702	6.20047	5.77906	0.0382893	2.53112	0.0285262	0.866269	1
CG12948	7.48188	9.5513	11.3504	11.5907	7.6111	13.0172	13.706	8.95445	12.4009	10.2532	-0.288823	3.47158	3.56391	0.0623754	0.265687
CG12950	137.916	150.957	127.568	124.759	150.7	117.936	104.862	125.634	121.684	129.563	0.20608	7.06924	4.66509	0.0335269	0.182701
CG12951	0	0	0	0	0	0	0	0	0	0	0	-1.25749	0	1	1
CG12963	0	0.232958	0	0	0	0	0	0	0	0	1.52444	-0.718971	1.24806	0.26768	0.594698
CG12964	0.748188	0.465917	0.740242	0.632222	1.52222	0.52069	0.870223	0.542694	1.29176	0.932107	-0.0404319	0.309609	0.00923073	0.92368	1
CG12970	0	0.232958	0	0.421482	0	0	0.870223	0	0.516706	0	-0.885755	-0.717586	0.870451	0.353531	0.703822
CG12971	0	0.232958	0	0	0.253703	0	0	0	0	0.186421	0.763647	-0.916839	0.399208	0.55137	0.924495
CG12974	1.49638	0.232958	0.493495	0.632222	2.02963	1.30172	1.08778	0.81404	0.258353	0.186421	0.417259	0.0195064	0.405142	0.526113	0.905712
CG12975	16.7095	15.1423	9.62315	12.0122	12.4315	10.6741	20.8854	17.3662	10.8508	17.8965	-0.24554	3.89906	2.68222	0.105079	0.363753
CG12983	0	0	0	0	0	0	0	0	0.258353	0	-1.52247	-1.24143	1.73344	0.241564	0.559103
CG12984	0	0	0	0	0	0	0	0	0	0	0	-1.23474	0	1	1
CG12985	1.24698	0.465917	1.23374	0.842963	1.01481	2.08276	1.52289	0.542694	0.258353	0.559264	-0.0491275	0.746813	0.0115083	0.914816	1
CG12986	0	0	0	0	0	0	0	0	0	0	0	-1.20795	0	1	1
CG1299	67.5863	52.8816	62.1803	50.7885	59.874	51.2879	49.3852	49.1138	47.0202	42.6905	0.292574	5.81636	5.6199	0.0199622	0.130637
CG12990	0	0.232958	0	0	0	0	0	0.271347	0	0.372843	-1.1645	-1.05847	1.09111	0.313253	0.654352
CG12991	108.487	105.53	94.0107	100.945	108.839	72.8966	72.011	71.6356	69.2385	76.2464	0.515504	6.48997	39.7456	1.15252e-08	3.50513e-06
CG12992	1.24698	1.16479	0.493495	1.47519	1.52222	0.52069	0.435112	0.271347	0.258353	0.559264	1.44906	0.329138	6.35438	0.013529	0.103145
CG12994	12.9686	16.773	13.3244	15.8056	13.9537	19.0052	17.8396	19.537	18.0847	19.2014	-0.36015	4.10101	7.092	0.00922091	0.080207
CG12995	0.748188	0	0.493495	1.0537	0.507407	1.04138	0.870223	0.271347	0	0.372843	0.132731	-0.234583	0.0324208	0.857592	1
CG12998	0.498792	0.465917	0	0	0.253703	0.781035	0.652667	0.81404	0.258353	0.372843	-1.16536	-0.139538	1.96345	0.164695	0.485607
CG13000	0	0	0	0	0.253703	0	0	0	0	0	1.53213	-1.23423	1.55117	0.236514	0.559103
CG13001	13.4674	13.2786	13.0776	9.90482	15.9833	13.5379	13.706	16.2808	11.3675	18.4557	-0.167765	3.71005	1.4303	0.234958	0.559103
CG13002	0	0	0	0	0.76111	1.04138	0	0	0	0	-0.360755	-0.942274	0.0812172	0.776438	1
CG13003	34.1672	26.0914	28.1292	32.6648	27.1463	18.7448	19.7976	23.6072	19.3765	22.557	0.508943	4.57795	12.7991	0.000568945	0.012757
CG13004	9.72644	14.6764	7.64917	12.8552	11.4167	9.37242	12.4007	10.5825	8.26729	9.50749	0.169347	3.66857	1.1057	0.295925	0.634364
CG13005	6.2349	3.96029	8.8829	5.69	5.32777	7.28966	6.30912	5.69828	5.94211	7.45686	-0.12671	2.58915	0.372664	0.543144	0.922633
CG13008	0.997584	0.931834	1.48048	1.68593	1.77592	1.04138	1.52289	1.35673	1.55012	1.67779	-0.0648507	1.00196	0.0263175	0.871503	1
CG13010	0	0	0	0.632222	0	0	0	0.271347	0.258353	0	0.453314	-0.413692	0.171751	0.679579	1
CG13012	16.4601	12.1138	9.3764	13.9089	9.64073	11.7155	14.5762	8.6831	11.8842	11.5581	0.0711585	3.48127	0.176442	0.675483	1
CG13014	8.72886	6.05692	9.12965	6.32222	6.59629	7.55	6.96179	4.88424	5.42541	7.45686	0.178208	2.7176	0.726051	0.396501	0.755384
CG13016	12.2204	13.5116	9.3764	11.8015	8.87962	8.07069	12.8358	8.41175	7.75058	9.13465	0.266584	3.28829	2.10337	0.150564	0.458489
CG13018	3.24215	3.26142	6.66218	6.32222	5.32777	4.68621	6.30912	4.88424	2.32517	4.84696	0.0997059	2.20517	0.153129	0.696517	1
CG13021	0	0	0	0	0	0	0	0.271347	0.258353	0	-2.25749	-1.19947	2.67349	0.109303	0.372579
CG13022	4.23973	3.49438	3.20772	4.00407	4.05925	3.90517	2.17556	2.44212	3.61694	4.47411	0.183798	2.19113	0.448722	0.504713	0.881798
CG13023	1.49638	1.63071	1.23374	1.89667	0.507407	1.04138	1.30533	1.62808	2.32517	1.86421	-0.256957	0.262667	0.312421	0.577631	0.943282
CG13024	7.73127	7.45467	8.38941	6.7437	6.84999	8.07069	6.96179	7.59771	6.97552	6.33833	0.0521412	2.98261	0.0808827	0.776779	1
CG13025	10.724	10.949	10.6101	10.537	11.1629	11.9759	11.748	11.6679	14.2094	12.6767	-0.206078	3.4409	1.18455	0.279432	0.6116
CG13026	13.218	5.82396	5.67519	5.26852	8.11851	5.72759	9.57246	7.59771	5.68376	6.15191	0.122792	2.83306	0.167144	0.683666	1
CG13028	0	0.232958	0	0	0	0.260345	0	0.271347	0	0	-0.73386	-1.21293	0.379056	0.568582	0.93523
CG13029	0	0	0	0	0.253703	0	0	0.271347	0	0	0.00559314	-1.16892	4.5466e-05	0.994646	1
CG13031	0	0.232958	0	0	0	0	0	0	0	0	1.52433	-1.15352	1.54648	0.236514	0.559103
CG13032	0	0.232958	0.740242	0.421482	0.253703	0.781035	0.217556	0	0.516706	0.186421	-0.00214683	-0.666681	1.59847e-06	0.998994	1
CG13033	0	0	0	0	0	0	0.217556	0	0	0	-1.50664	-1.1124	1.37869	0.245028	0.563982
CG13038	0.249396	0.232958	0	0	0	0	0	0	0	0	2.2535	-0.731458	2.82301	0.0968637	0.346854
CG13039	0	0	0	0	0	0	0	0	0	0	0	-1.30545	0	1	1
CG1304	0	0	0	0	0	0	0	0	0	0	0	-1.13041	0	1	1
CG13040	0	0	0.246747	0	0	0	0	0	0.258353	0	0.00716281	-1.24777	5.52215e-05	0.994125	1
CG13041	0	0	0	0.210741	0.253703	0	0	0.81404	0	0	-0.504085	-0.824135	0.182501	0.670393	1
CG13042	0.249396	0.465917	0	0.210741	0.253703	0	0.217556	0	0	0.186421	1.16336	-0.57349	1.23487	0.269518	0.597591
CG13043	0	0.698875	0.740242	1.26444	0.253703	0.52069	0.435112	0.271347	0.258353	0	1.03342	0.651828	1.5774	0.212492	0.559103
CG13044	0.249396	0	0.493495	0	0.507407	0	0.435112	0.81404	0	0	0.0148406	0.296861	0.00016595	0.989753	1
CG13045	0	0.232958	0	0	0	0	0	0	0	0	1.52431	-1.22163	1.60187	0.236514	0.559103
CG13046	3.49154	3.02846	3.45446	1.89667	2.79074	1.82241	3.04578	3.52751	5.68376	3.72843	-0.283733	1.21909	0.756649	0.386768	0.743874
CG13047	0.249396	0.232958	0.493495	0.210741	0	0.260345	0.217556	0	0	0.372843	0.335563	-0.913246	0.133326	0.721831	1
CG13048	0	0	0	0	0	0	0.217556	0	0	0	-1.5065	-1.27753	1.72487	0.241564	0.559103
CG13049	0.249396	0.232958	0	0	0	0	0	0.271347	0	0.186421	0.0259071	-0.996379	0.000459099	0.988109	1
CG13050	0	0	0	0	0	0	0	0	0	0	0	-1.29936	0	1	1
CG13051	0.249396	0.465917	0.493495	0.210741	0.76111	0.260345	1.08778	0.81404	0.516706	0.932107	-0.739523	-0.249509	1.22231	0.27195	0.60131
CG13053	0	0.232958	0.493495	0	0	0.260345	0.435112	0	0	0.186421	-0.318701	-0.918142	0.0891729	0.765976	1
CG13054	2.24456	2.09663	1.97398	2.10741	1.01481	3.12414	2.17556	2.98482	3.35859	3.16916	-0.635301	1.39639	4.25551	0.0420986	0.209751
CG13055	1.99517	4.19325	4.1947	4.84704	5.32777	6.50862	5.4389	5.69828	3.61694	4.47411	-0.313756	2.57197	1.91556	0.16988	0.495446
CG13056	1.49638	0.931834	0.986989	0.842963	0.507407	0.781035	1.30533	0.542694	0.516706	0.372843	0.422324	0.0565903	0.556137	0.457827	0.829244
CG13058	0.249396	0	0	0	0.507407	0.260345	0.217556	0	0	0	0.506875	-1.05371	0.234977	0.641691	1
CG13059	0	0.232958	0.246747	0	0.253703	0	0.217556	0.271347	0	0	0.496001	-0.93312	0.210804	0.647396	1
CG13060	0	0	0	0	0.253703	0	0.217556	0	0	0	0.0254883	-1.18113	0.000338566	0.991591	1
CG13062	0	0	0.740242	0.632222	0	0	0.217556	0.271347	0.516706	0.372843	0.0134002	-0.196052	0.000265687	0.987032	1
CG13063	0	0	0	0	0	0	0	0	0	0	0	-1.21183	0	1	1
CG13064	0	0	0	0	0	0	0	0	0	0	0	-1.25512	0	1	1
CG13065	0	0	0	0	0	0.260345	0	0	0	0	-1.52273	-1.00364	1.59587	0.241564	0.559103
CG13066	0	0	0	0	0	0	0.435112	0	0	0.186421	-2.68446	-1.21547	4.78557	0.0425212	0.209883
CG13067	29.4287	19.3356	28.1292	24.6567	14.2074	26.0345	25.454	18.9943	17.3096	20.6928	0.0927044	3.99454	0.266052	0.607299	0.972736
CG13068	0.997584	0.465917	0.740242	1.26444	0.76111	0.781035	1.30533	0.542694	1.03341	0.372843	0.0805848	-0.346767	0.0203047	0.887018	1
CG13069	1.24698	0.698875	0	0.632222	0	0	0.652667	0.542694	0.258353	0.372843	0.458111	-0.235619	0.389478	0.534204	0.913644
CG1307	21.6974	24.6936	27.389	30.9789	24.6092	37.2293	43.5112	28.2201	34.6193	35.0472	-0.465198	4.88922	13.5373	0.000404211	0.0102911
CG13070	0	0	0	0	0	0	0	0	0	0	0	-1.26296	0	1	1
CG13071	19.4529	15.1423	17.5191	16.0163	12.1778	13.7983	18.9274	13.8387	17.0513	18.0829	-0.0296181	3.35607	0.0245453	0.875868	1
CG13073	0.498792	0.465917	0	0.632222	0.507407	0.260345	0	0	0	0	2.63323	-0.613091	6.15498	0.0150245	0.110609
CG13074	0.498792	0.232958	0	0	0.253703	0.260345	0	0.542694	0.258353	0.372843	-0.503369	-0.562265	0.321332	0.572265	0.938825
CG13075	0.249396	0	0	0	0	0	0.652667	0.271347	0	0.186421	-1.81136	-0.741611	2.87183	0.0937118	0.34456
CG13077	53.6201	49.3872	50.8299	50.7885	49.2185	42.1759	48.5149	35.5464	42.8866	43.809	0.251311	5.35061	4.17523	0.0440384	0.214012
CG13078	0	0	0	0	0	0	0	0	0	0.372843	-2.19423	-1.19265	2.43268	0.126873	0.410643
CG13081	0.249396	0	0	0	0	0	0	0	0	0.186421	0.0392917	-0.998734	0.000813798	0.991591	1
CG13082	3.24215	2.32958	2.22073	2.52889	2.02963	6.50862	3.48089	3.52751	3.87529	2.98274	-0.702168	2.22543	4.69421	0.0329929	0.180882
CG13083	0	0	0	0	0	0	0	1.35673	0	0	-3.39397	0.61937	4.35862	0.0414524	0.208033
CG13084	0	0	0	0	0	0.52069	0	0.81404	0	0	-3.39304	0.420458	5.29739	0.0241291	0.147356
CG13085	0.249396	0.698875	0.246747	0.421482	1.26852	0.781035	1.08778	1.08539	0.258353	0.932107	-0.527855	0.464311	1.16276	0.289839	0.626212
CG13086	1.24698	3.26142	1.72723	3.58259	1.26852	1.56207	4.35112	2.71347	2.32517	0.372843	0.014371	2.25365	0.000898486	0.976156	1
CG13088	3.99033	4.65917	5.18169	4.6363	6.34258	3.64483	4.35112	1.89943	6.71717	3.16916	0.325335	2.17693	2.01257	0.159566	0.475599
CG1309	114.972	90.8538	87.1018	91.2508	87.0203	74.9793	104.209	89.5445	76.7308	85.9403	0.126072	6.36573	2.00472	0.160373	0.476392
CG13090	9.72644	6.7558	8.14266	10.537	8.11851	8.85173	11.0953	7.59771	8.78399	8.38896	-0.0477334	3.19044	0.0788212	0.779567	1
CG13091	0.249396	0	0	0	0	0	0	0	0	0.186421	0.0397845	-1.13883	0.000569119	0.991591	1
CG13096	7.23248	8.61946	9.62315	9.27259	5.32777	11.9759	11.3129	10.3112	10.0758	10.626	-0.43261	3.52015	2.77481	0.0993479	0.35022
CG13097	4.23973	9.08538	16.7788	10.3263	7.10369	11.7155	9.57246	14.11	13.176	15.2866	-0.42367	3.64396	3.00321	0.0866357	0.331084
CG13101	17.7071	12.1138	10.6101	12.223	11.4167	4.68621	8.04956	4.6129	7.23388	5.03338	1.10562	3.27198	21.4294	1.27139e-05	0.00090153
CG13102	0	0	0	0	0	0	0	0	0	0	0	-0.893564	0	1	1
CG13108	6.98309	10.4831	18.9995	11.38	13.1926	19.7862	18.7098	16.5522	16.2762	20.1335	-0.58702	3.94586	8.6236	0.00424342	0.0471626
CG1311	58.608	58.7055	43.921	40.0407	44.1444	33.3241	36.7669	32.0189	41.8531	33.3694	0.468165	5.59418	15.6184	0.000157049	0.0052963
CG13110	0	0	0	0	0	0	0	0	0	0	0	-1.30545	0	1	1
CG13113	0	0	0	0	0	0	0	0	0	0	0	-1.06921	0	1	1
CG13114	0	0.232958	0	0.210741	0	0	0	0.81404	0	0	-0.504323	-0.444282	0.149652	0.699961	1
CG13116	24.6902	21.1992	21.467	21.917	21.8185	20.3069	23.9311	21.4364	25.0602	16.9643	0.0476426	4.35128	0.120057	0.729808	1
CG13117	51.625	43.3303	56.5051	53.7389	51.2481	68.4707	77.0148	64.5805	62.7797	63.7561	-0.392653	5.74924	14.3946	0.00027295	0.00776879
CG13123	3.99033	2.56254	4.44145	4.6363	3.29814	3.64483	6.52667	3.52751	3.61694	2.79632	-0.0864202	2.02766	0.113307	0.737219	1
CG13124	565.131	497.832	462.158	413.473	469.098	415.771	419.23	387.755	406.906	426.346	0.227557	8.60158	8.43309	0.0046673	0.0503352
CG13126	14.2156	13.9775	12.8309	13.0659	14.7148	14.0586	11.3129	11.3966	13.951	13.4223	0.100312	3.68289	0.726656	0.4185	0.781627
CG13127	0	0	0	0	0	0	0	0	0	0	0	-1.30545	0	1	1
CG13131	0	0	0	0	0	0	0	0	0	0	0	-1.28377	0	1	1
CG13133	12.9686	0.465917	2.46747	0	0.507407	2.08276	3.69845	3.25616	0.775058	3.35559	0.252103	2.83977	0.0948878	0.758788	1
CG13135	0	0	0	0	0	0	0	0	0.258353	0	-1.52246	-1.23722	1.59648	0.241564	0.559103
CG13137	0	0	0	0	0.253703	0	0	0	0	0	1.5321	-1.20792	1.82427	0.236514	0.559103
CG13138	0	0	0	0	0	0	0	0	0	0	0	-1.14913	0	1	1
CG1314	0.249396	0	0	0	0	0	0.435112	0	0.516706	0	-1.54922	-1.02484	1.91098	0.170948	0.496517
CG13142	6.98309	11.415	5.67519	6.95445	6.59629	8.59138	8.91979	7.05502	6.20047	6.52475	0.0158673	3.14287	0.00712586	0.93292	1
CG13144	0.748188	1.39775	1.23374	1.26444	1.01481	2.60345	3.26334	0.81404	2.32517	1.49137	-0.874236	1.02906	3.58014	0.0617938	0.264243
CG13148	6.73369	7.45467	7.15567	6.53296	8.11851	9.89311	11.3129	11.1252	6.71717	7.8297	-0.379118	2.91461	3.58579	0.0615926	0.263763
CG1315	0.997584	2.56254	3.70121	6.32222	1.77592	6.50862	9.3549	4.88424	5.42541	2.23706	-0.842762	2.82227	4.04877	0.0472908	0.222889
CG13151	3.49154	3.26142	7.89591	5.69	5.32777	5.72759	8.48468	6.78367	7.75058	6.71117	-0.466633	2.74104	4.31421	0.0407382	0.205497
CG13154	0	0	0	0.210741	0	0	0.217556	0.271347	0.258353	0	-1.21494	-1.02273	0.995414	0.321316	0.664687
CG13155	0	0.232958	0	0	0.253703	0	0.217556	0	0	0.186421	0.0463183	-1.21435	0.00149232	0.988109	1
CG13157	0	0	0	0	0	0	0	0	0	0	0	-1.30545	0	1	1
CG13159	0	0	0	0	0	0	0	0	0	0	0	-1.11158	0	1	1
CG1316	150.136	164.236	187.775	155.105	169.22	187.448	187.316	206.766	196.09	200.962	-0.243821	7.44342	10.7461	0.00150199	0.0242741
CG13160	0	0	0	0	0	0	0	0	0	0	0	-1.17032	0	1	1
CG13163	6.2349	6.98875	6.90893	6.53296	8.37221	8.33104	11.9656	10.0398	8.52564	7.08401	-0.389087	3.11214	5.40242	0.0224341	0.14059
CG13168	2.24456	2.56254	3.45446	1.0537	1.26852	1.56207	1.30533	2.44212	1.80847	3.16916	0.0175945	1.40823	0.00260368	0.971523	1
CG1317	258.374	246.936	208.008	232.658	229.348	214.524	159.904	199.983	198.415	200.217	0.272806	7.71275	14.1394	0.000306649	0.00842253
CG13170	0	0.232958	0.246747	0	0.253703	0	0	0	0	0.186421	1.2476	-1.12944	1.17641	0.299476	0.637482
CG13171	0	0	0	0	0	0	0	0	0	0	0	-1.28406	0	1	1
CG13175	0	0	0	0	0	0	0	0	0	0	0	-1.30545	0	1	1
CG13177	0.249396	1.63071	1.48048	0.210741	1.26852	1.82241	1.74045	0.81404	0.516706	1.67779	-0.470685	0.972399	0.209967	0.647934	1
CG13178	1.74577	1.16479	0.493495	0.421482	1.01481	1.30172	0.435112	0.81404	0.516706	0.745686	0.335753	0.821126	0.354535	0.5531	0.926096
CG13183	0.997584	0.931834	0.740242	0.421482	1.52222	0	0.435112	0.542694	0	0.745686	1.25513	0.758494	5.96627	0.028793	0.164511
CG13185	26.436	34.0119	28.6227	31.6111	29.937	42.4362	18.2747	29.3055	39.0113	24.4212	-0.0173707	5.11366	0.00976905	0.921493	1
CG13186	0	0	0	0	0	0	0	0	0	0	0	-1.27663	0	1	1
CG13188	6.73369	6.7558	3.94796	5.90074	5.32777	6.24828	4.13356	6.24098	6.71717	6.15191	-0.0334633	3.11898	0.0264789	0.890116	1
CG1319	29.9275	27.0232	25.415	24.0244	19.7889	23.1707	30.0227	20.8937	22.9934	19.7607	0.110431	4.64228	0.940004	0.334959	0.681613
CG13192	23.942	20.2674	16.5321	16.227	14.9685	11.4552	20.8854	13.0246	12.4009	13.9816	0.349708	3.86303	5.83599	0.0177889	0.121849
CG13193	0	0	0	0	0	0	0	0	0.258353	0	-1.52235	-1.17318	1.75445	0.241564	0.559103
CG13196	0	0	0.246747	0	0.253703	0	0	0	0	0	2.26019	-1.22705	3.49639	0.0941171	0.34456
CG13197	35.1648	28.4209	37.9991	30.1359	30.1907	27.5966	37.6372	32.2903	31.0023	37.6571	-0.0423995	5.01902	0.198565	0.656986	1
CG13198	0	0	0	0	0	0	0.217556	0	0.258353	0	-2.2385	-1.11478	3.07584	0.097688	0.346854
[truncated: 14,728 more rows]
